# Supplementary material for: Diversity and Distinctive Characteristics of the Global RNA Virome in Urban Environments
Source: Research Square preprint supplement (doi:10.21203/rs.3.rs-6735172/v1), 2025-06-26
Supplement: Supplementary file 2 [file 23e83939b82333f720592e04.docx]

**Figures S1**

**
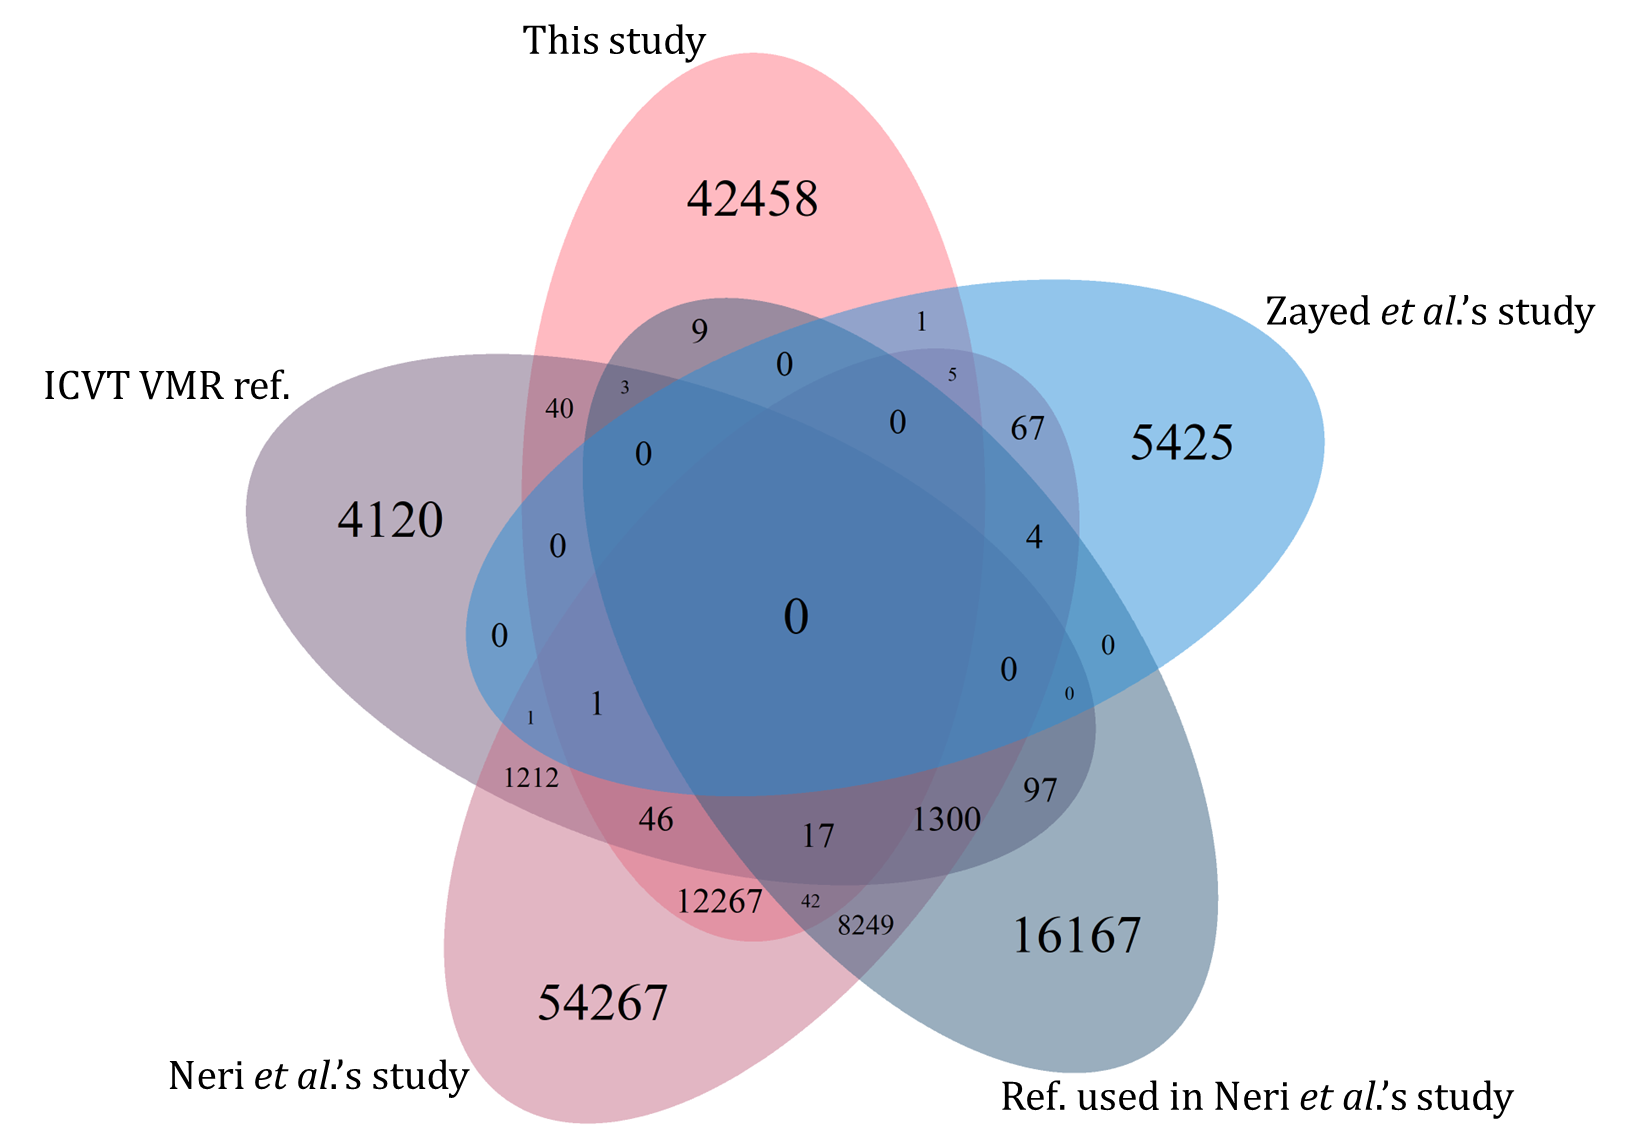
**

Figure S1. A Venn diagram illustrating the novelty of the urban RNA virome and its overlap with four previously published RNA virome datasets.

**Figures S2**

**
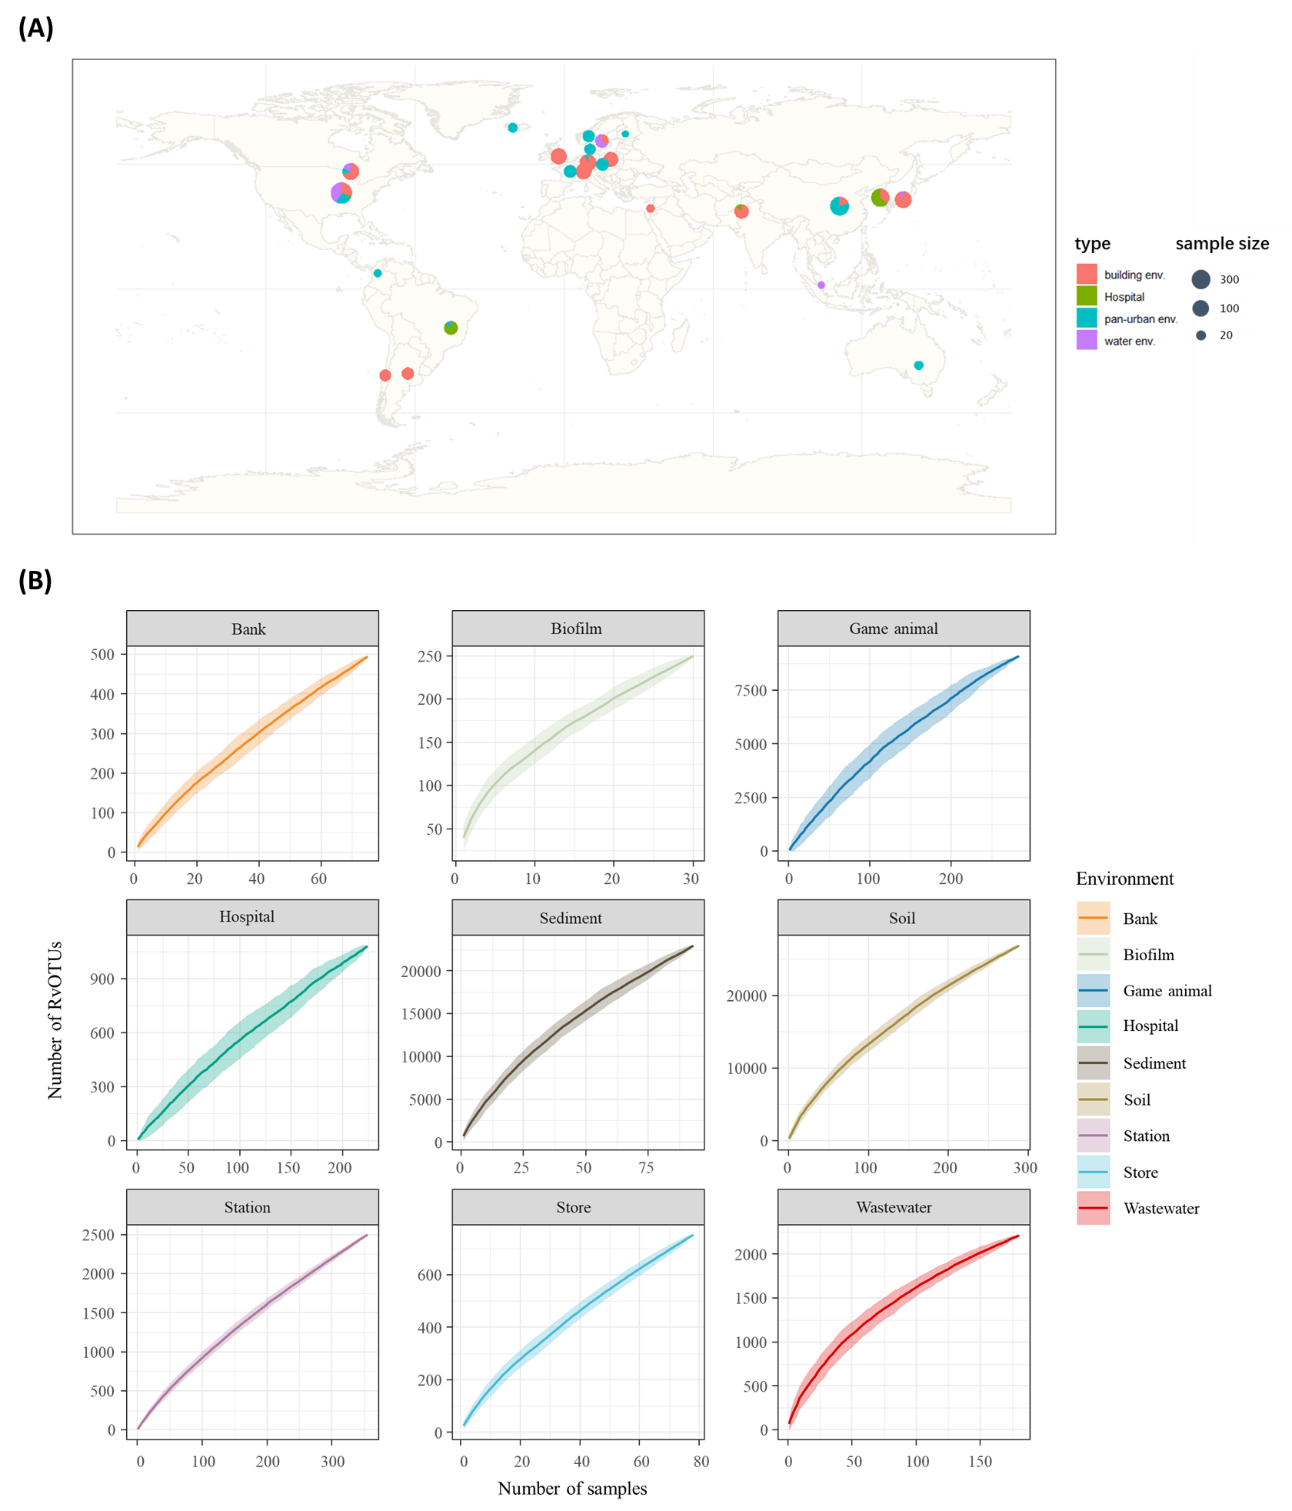
**

Figure S2. Urban-RvOTU rarefaction curves of samples collected from different environments. The values were obtained via bootstrapping.

**Figure S3**


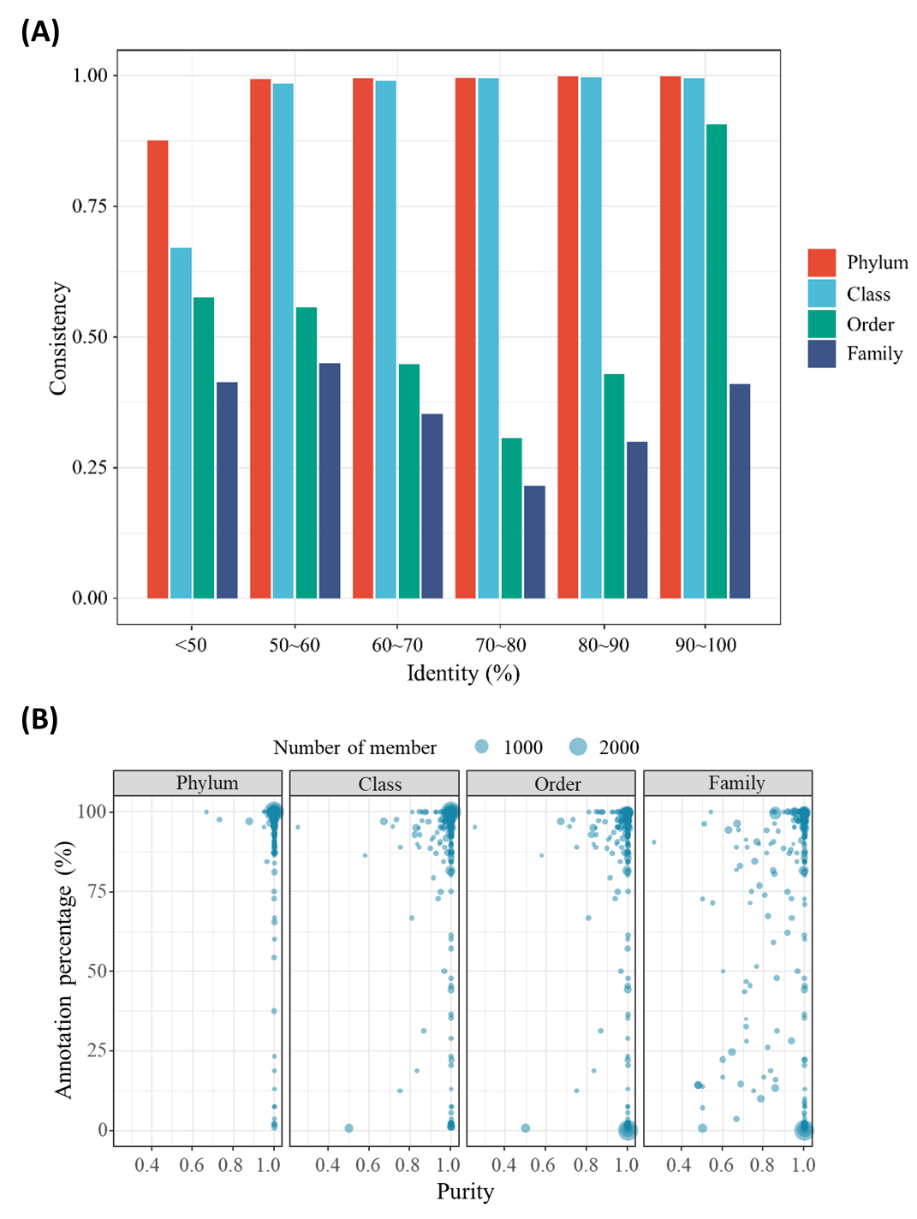


Figure S3. (A) Consistency of taxonomic classification results between geNomad and the best-hit approach across various taxonomic levels. (B) Annotation purity of the RCR95 representatives in the clusters, which were formed using a sequence identity threshold of 0.3, across different taxonomic levels. The size of the points indicated the number of RCR95 representatives in the related cluster.

**Figure S4**


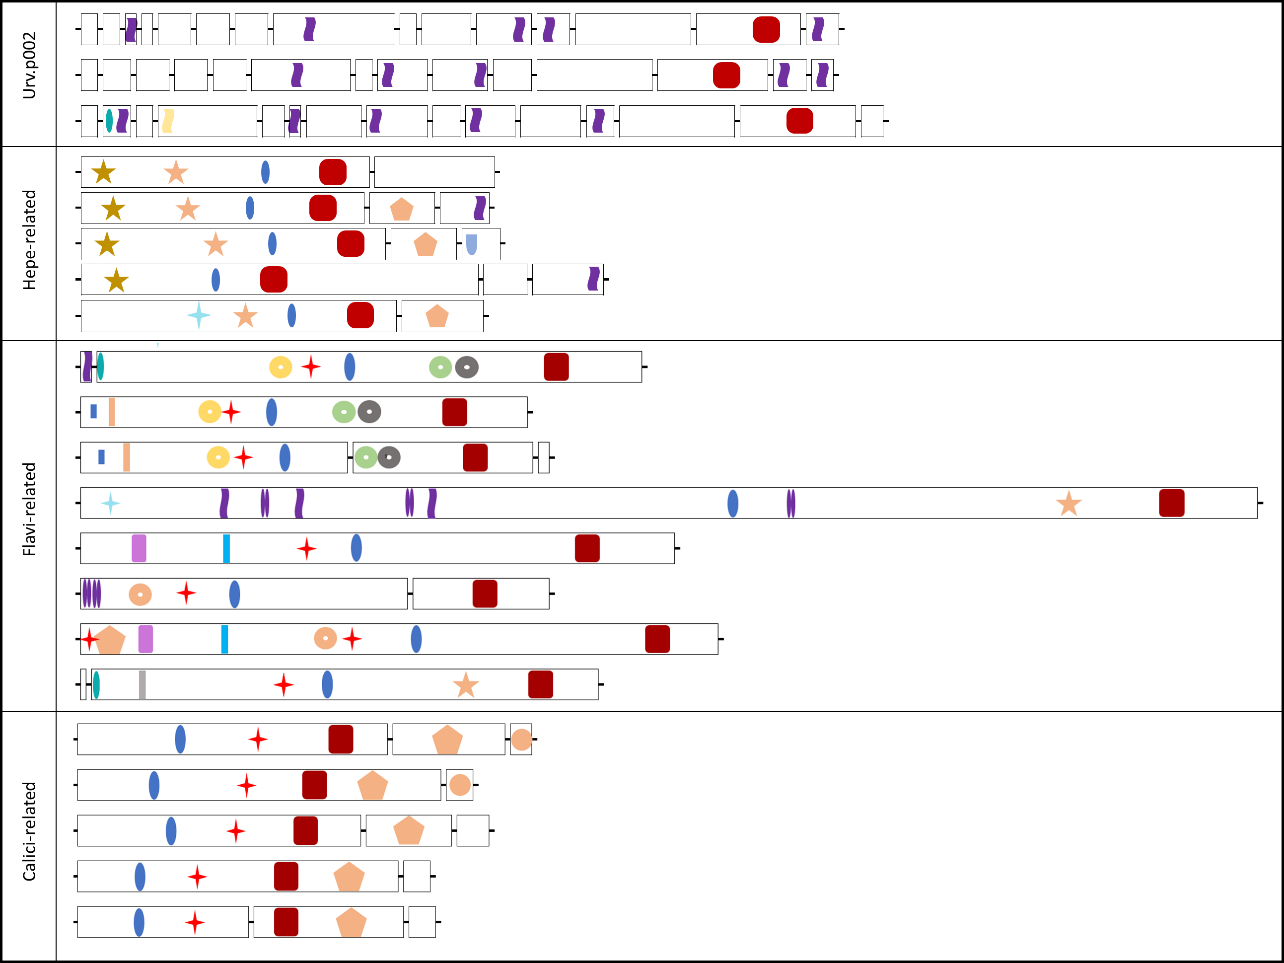


Figure S4. Diversity of protein domains in RNA viruses. Homologous domains are shown as the same shape and color, which were illustrated on the bottom.

**Figure S5**


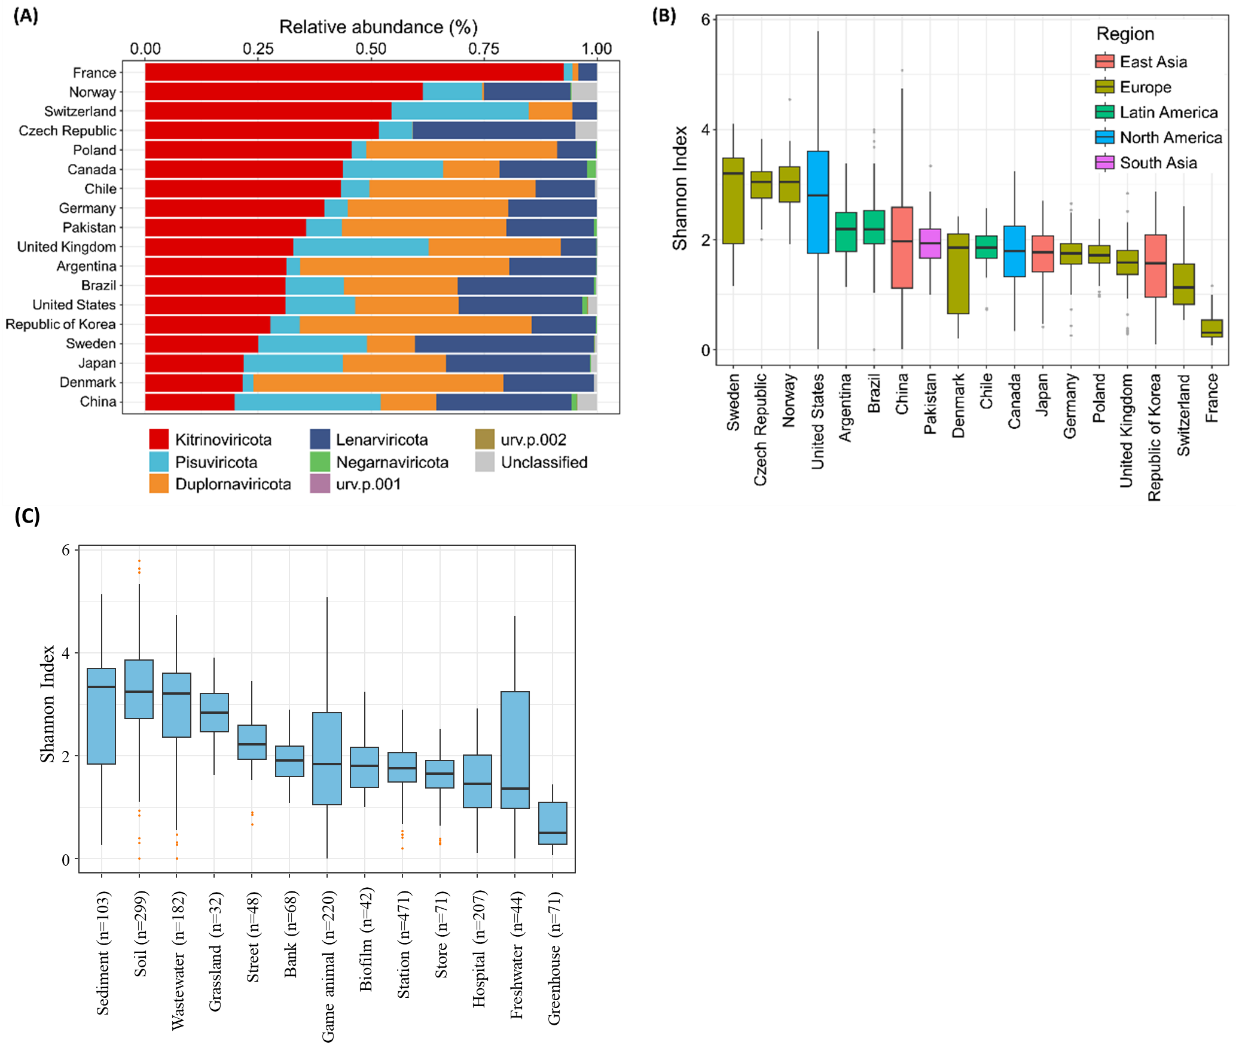


Figure S5. (A) Composition and diversity of the RNA viral community across different countries. (B) The alpha diversity of the viral community was measured using the Shannon index. (C) Shannon diversity index (SDI) of samples collected from different environments. The SDI was calculated using the “*diversity*” function in the Vegan package. The numbers in parentheses indicate the sample size.

**Figure S6**


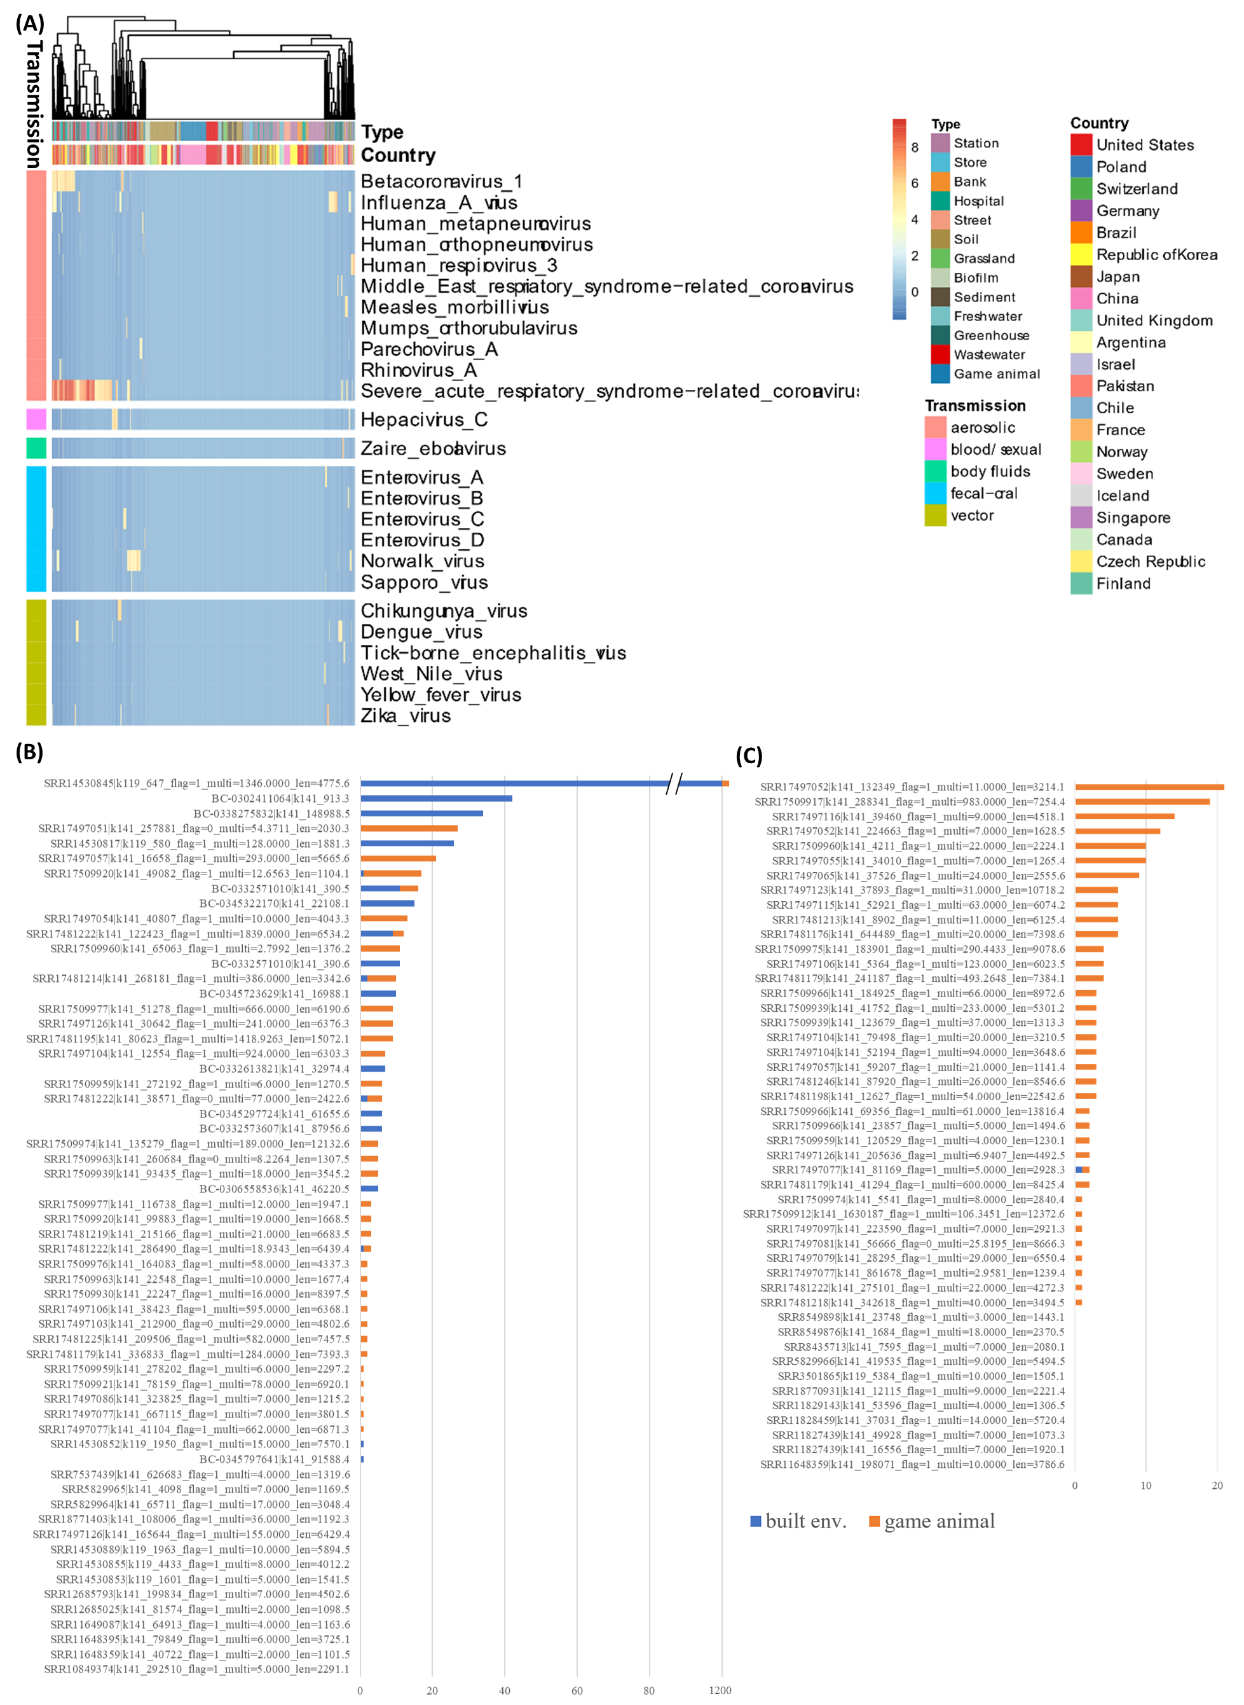


Figure S6. (A) Heatmap of Z-scored mean abundance of various human pathogenic RNA viruses in each sample. Samples are color-coded by country and environment, and clustered based on abundance patterns. Viruses are grouped and color-coded according to their transmission type. (B) Numbers of samples in which 60 human-associated RCR95s were detected. (C) Numbers of samples in which 47 mammalian-associated RCR95s were detected.

**Figure S7**


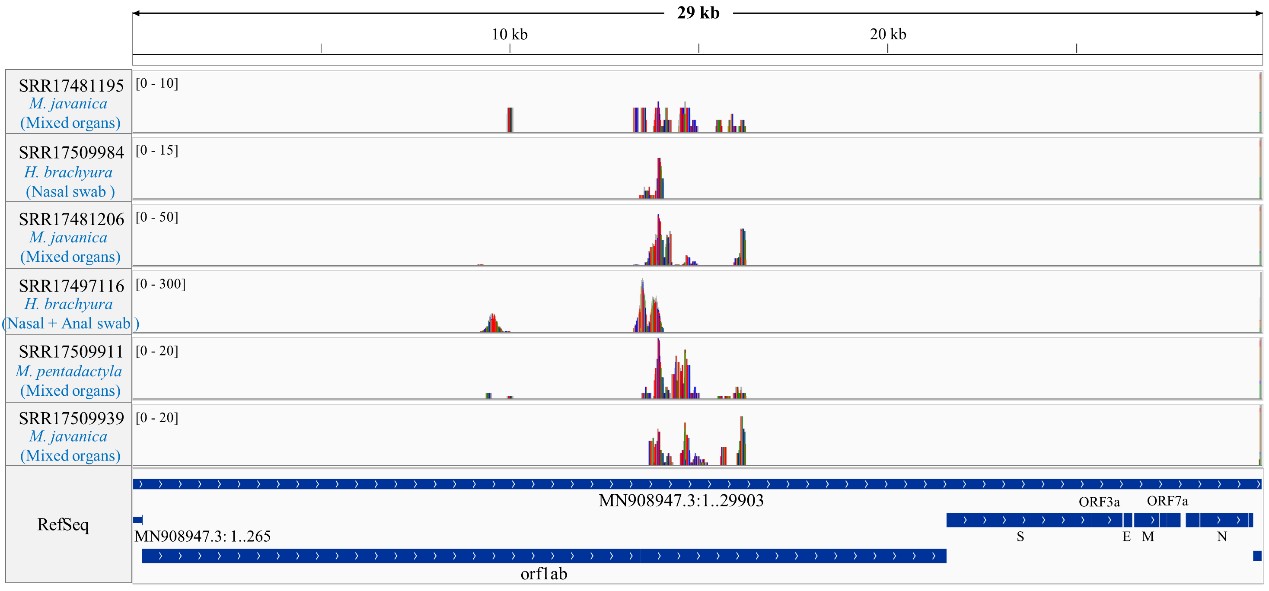


Figure S7. Distribution of reads from six samples collected from different body parts of game animals, mapped back to the SARS-CoV-2 reference genome.

**Figure S8**


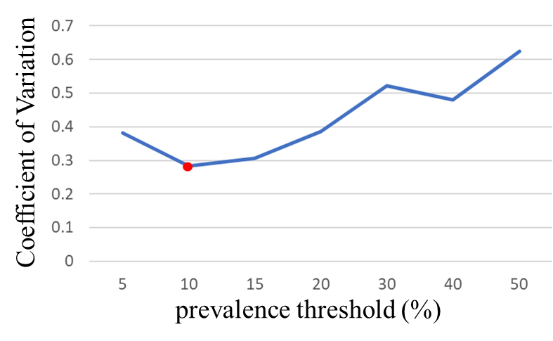


Figure S8. Calculating the coefficient of variation of the sizes of core-viromes from different environment sets. A relatively balanced number of core-viromes was obtained across all environment set under the prevalence threshold of 10%.
