# Supplementary material for: Diversity and Distinctive Characteristics of the Global RNA Virome in Urban Environments
Source: Research Square preprint supplement (doi:10.21203/rs.3.rs-6735172/v1), 2025-06-26
Supplement: Supplementary file 3 [file 3f6b94dc5ac4d4d6375796f8.xlsx]

## Sheet: Supplementary Table 6
Table S5. FADE analysis results showing sites under directional selection results in the RdRPs
phylum	amino acid	site index	rate	bias	prob [bias>0]	bayes factor [bias>0]	composition	substitutions
dupl	I	338	0.89	9.57	1	2824.78	A2,E2,I57,K2,L19,Q8,R2,S13,T9,V2	I->E(1)K(1)L(1)Q(1)R(1)S(2)T(1)V(1), L->I(2)V(1), S->A(1)E(1)I(1)K(1), T->A(1)Q(1)R(1)
kitr	F	432	0.72	7.62	1	172.97	A19,D6,F42,G187,H2,L2,R1,S14,V1,W8	A->D(1)F(1)S(1), F->A(1)L(1), G->A(4)D(1)F(1)H(2)L(1)R(1)S(4)V(1)W(2), S->A(1), W->F(2)
kitr	F	832	0.69	3.03	1	107.86	F251,I5,K1,L1,M1,P3,S1,Y5	F->I(1)L(1)P(1)Y(3), I->M(1), P->K(1)S(1)
kitr	G	338	0.75	5.34	1	710.71	C4,D74,G20,H5,I1,L2,M1,N36,P2,Q2,S63,T66,V5	C->G(1), D->G(1)H(1)N(1), N->D(4)G(4)M(1)T(2), P->D(1), S->C(1)D(1)G(3)L(2)N(2)P(1)Q(2)T(5), T->D(1)G(1)I(1)S(4)V(5)
kitr	G	546	1.01	3.21	1	218.37	A80,C23,F10,G22,H1,I42,K1,L52,M16,P4,Q5,R3,S3,T2,V16,Y1	A->C(4)G(12)H(1)I(5)K(1)L(1)M(7)P(1)Q(2)R(1)T(2)V(5)Y(1), C->L(1)M(1)V(1), I->L(1)V(1), L->A(2)C(1)F(2)I(3)V(1), M->F(1)Q(1)S(1)V(1), V->C(1)F(1)I(2)P(1)
kitr	G	557	1.22	2.84	1	100.26	A6,C35,D1,E4,F19,G16,H1,I7,L7,M1,N2,Q8,R7,S60,T40,V51,Y13	C->A(1)F(2)L(2)T(1)V(2), I->L(1), L->I(1), Q->A(1)D(1)R(1), S->A(2)C(2)E(1)F(1)G(11)H(1)N(1)Q(2)R(3)T(3)Y(1), T->A(1)C(2)F(1)L(1)Q(1)R(1)S(4)V(3)Y(1), V->A(1)C(1)E(1)F(3)G(1)I(4)L(2)M(1)N(1)S(1)T(1)Y(3)
kitr	T	434	0.56	1.75	1	221.26	A1,C26,G73,H1,I5,K3,S45,T122,V1,Y5	C->I(1)K(1)Y(1), G->S(3), I->V(1), S->C(1)G(2)I(1)T(6), T->A(1)H(1)S(4)
kitr	Y	355	0.74	2.45	1	469.86	A10,F13,I5,L30,M55,Q1,S1,V1,W5,Y160	A->Y(1), L->F(2)M(1), M->A(1)L(6)S(1)Y(4), Y->F(5)I(1)L(1)M(2)Q(1)V(1)W(3)
lena	C	253	1.1	3.24	1	141.35	A235,C14,D7,E1,F130,G6,H5,I13,L43,M3,N3,Q1,R1,S20,T5,V45,W2,Y1	A->C(7)D(2)G(4)S(11)T(3)V(4)W(2), F->A(1)I(1)L(7)M(1)N(1)Q(1)V(1)Y(1), H->N(1), I->V(1), L->C(2)F(1)H(1)I(2)M(2)R(1), S->D(1), V->A(3)C(1)E(1)F(3)I(1)L(3)N(1)T(2)
lena	C	455	1.23	15.52	1	894.15	A19,C111,D29,E117,F7,G1,H2,I4,K8,L14,M1,N19,Q6,R11,S49,T117,V20,W1,Y6	A->D(1), C->A(6)L(2)S(8)T(8), D->E(1)K(1)Y(1), E->A(4)D(13)F(1)G(1)H(1)I(2)K(7)L(3)N(2)Q(4)R(6)S(7)T(3)V(4)W(1)Y(2), L->C(1)V(1), R->H(1)N(1)S(1), S->C(1)F(1)T(3)V(1), T->A(4)C(8)L(4)M(1)S(11)V(4), V->C(1)I(2)L(1), Y->F(1)
lena	C	741	0.92	6.09	1	3125.15	A87,C268,E1,G2,N2,S132,T53,V1	A->C(1)G(2)S(5)T(1), C->A(1)N(2)S(3)T(4), S->A(7)C(1)T(11), T->A(2)E(1)S(3)V(1)
lena	C	747	1.13	3.67	1	364.58	A34,C12,F1,G2,I204,L145,M4,S5,T5,V134	A->C(2)F(1)G(1)M(1)S(3), I->A(10)C(4)L(22)M(3)V(20), L->G(1)V(4), V->A(4)C(4)I(3)L(6)T(5)
lena	C	748	1.19	2.76	1	441.65	A145,C55,F7,G3,I37,L9,M4,S18,T5,V71,W4,Y188	A->C(9)F(2)G(3)I(1)L(3)M(1)S(14)T(3)V(11)W(1)Y(3), C->I(1)L(1)S(1)V(2), I->A(1)V(1), L->C(1), M->A(1), V->A(4)C(1)I(10)S(1)T(1), Y->C(3)F(5)I(1)T(1)W(1)
lena	C	923	0.69	6.71	1	4716.42	A10,C10,F32,G1,I51,K1,L6,S2,T2,V233,Y195	F->A(2)G(1)I(2)T(1)V(1)Y(2), I->L(1)V(2), V->A(6)C(10)F(4)I(22)K(1)L(4)S(1)T(1), Y->F(1)L(1)S(1)
lena	C	964	1.13	6.5	1	276.29	A10,C27,E1,F97,H1,I28,L144,M3,N4,T3,V195,Y19	C->A(2)F(1)L(1)V(1), F->C(1)H(1)I(2)L(5)N(2)V(5)Y(11), I->F(1)M(1), L->A(1)C(8)F(8)I(2)M(2)N(2)T(1)V(4)Y(1), V->A(3)E(1)I(8)L(6)T(2)Y(1), Y->C(1)F(1)
lena	C	974	0.45	8.94	1	166.02	A1,C26,D1,F256,G2,H8,I5,L15,M1,P1,Y210	F->C(3)H(2)I(1)L(1)Y(12), H->C(1), I->H(1), L->A(1)D(1)G(2)I(1)M(1)P(1)Y(1), Y->F(1)
lena	C	998	0.29	9.83	1	130.01	A153,C5,F7,G3,I1,K13,L35,R284,S2,T16,V7	A->C(4)F(5)G(3)I(1)L(10)R(1)S(1)T(2)V(4), L->A(2)V(1), R->K(7)L(1), T->A(1)C(1)S(1)
lena	D	203	0.92	36.18	1	399.09	D97,G1,K2,P20,R2,S14,T1	D->G(1)R(1)S(9)T(1), P->D(2)K(2)R(1)
lena	D	229	1.57	23.06	1	3.46003e+07	A2,D238,E2,F1,G13,H4,I1,K2,N11,P1,Q1,R6,S15,T52,Y2	D->A(2)E(2)F(1)G(4)H(3)K(1)N(5)P(1)Q(1)R(1)S(9)T(19), G->R(1), R->H(1)K(1)S(1), S->T(1), T->I(1)N(2)S(2)Y(2)
lena	D	267	1.67	14.27	1	536.83	C1,D538,E1,P1	D->C(1)E(1)P(1)
lena	D	537	2.81	6.92	1	393925	A8,C7,D144,E112,F10,G57,H3,I4,K32,L5,M2,N31,P22,Q3,R14,S48,T10,V30,Y2	D->A(1)C(1)E(3)G(6)K(2)N(11)S(5)T(2), E->A(3)C(2)D(22)G(5)H(2)I(2)K(10)L(2)M(1)N(6)P(7)Q(2)R(6)S(11)T(6)V(13)Y(1), F->A(1), G->D(3)M(1)Q(1)R(1)S(3)V(1), K->E(1)G(1)I(1)N(2)R(1)S(1)V(1)Y(1), N->D(1), P->D(1)F(1)L(1)N(1), R->D(2)L(1)N(1)S(2), S->A(1)C(2)H(1)K(1)L(1)N(1)T(1), V->C(2)I(1)P(1)T(1)
lena	D	905	2.81	2.51	1	179.2	A8,C2,D38,E4,F14,G3,H52,I122,K3,L153,M6,N4,P8,Q2,R8,S5,T23,V47,W8,Y7	A->P(1), D->N(1)R(1)S(2), H->A(1)D(12)E(1)F(1)I(4)K(1)L(5)N(1)P(1)Q(1)S(1)T(5)Y(2), I->A(1)F(2)K(1)L(13)M(4)R(1)S(1)V(14)W(1)Y(1), L->A(3)C(2)D(1)E(3)F(8)G(2)H(2)I(5)K(1)M(2)N(1)P(5)Q(1)R(4)T(4)V(4)Y(2), T->D(1)G(1)N(1)P(1)V(2)Y(1), V->F(1)I(1)L(2)S(1), W->D(1)L(1)Y(1)
lena	D	1302	2.81	0.96	1	858.66	A4,C2,D238,E65,G95,H2,K7,L4,N29,P11,Q10,R15,S17,T9,V3,W2	D->C(1)E(9)L(1)N(7)P(3)Q(3)S(6)T(2)V(2)W(1), E->A(1)C(1)D(4)G(6)H(1)K(4)L(1)N(5)P(3)Q(4)R(4)S(2)T(1), G->A(3)D(3)E(3)H(1)N(4)P(2)Q(1)R(6)S(3)T(3), N->G(1)K(1)P(1)W(1), Q->L(1), T->L(1)N(1)V(1)
lena	F	76	0.7	16.51	1	18306.2	F20,W62,Y9	F->Y(1), W->F(7)Y(4), Y->F(2)
lena	F	136	0.12	41.48	1	492.53	F2,K129,P1	K->F(2)P(1)
lena	F	360	1.22	2.6	1	9405.45	C2,F276,H1,I5,L220,M25,T2,V9,W1,Y3	F->C(1)I(2)L(16)T(2)V(1)W(1), L->C(1)F(15)I(3)M(9)V(6)Y(2), Y->H(1)
lena	F	737	0.36	21.38	1	6405.6	F537,L5,W4	F->L(1)W(2)
lena	F	917	0.08	45.61	1	11808800000000	C1,F98,H1,K5,L5,N229,Y207	F->Y(4), Y->C(1)F(24)H(1)K(1)L(1)N(1)
lena	F	966	0.32	13.7	1	2.11142e+07	A13,C2,F93,G3,I1,L406,M8,S1,T2,W1,Y1	A->F(1)L(1)Y(1), F->C(1)I(1)L(1)W(1), L->A(1)C(1)F(15)G(1)M(5)S(1)T(1), M->T(1)
lena	F	998	0.29	13.35	1	1653.96	A153,C5,F7,G3,I1,K13,L35,R284,S2,T16,V7	A->C(4)F(5)G(3)I(1)L(10)R(1)S(1)T(2)V(4), L->A(2)V(1), R->K(7)L(1), T->A(1)C(1)S(1)
lena	F	1007	0.62	6.84	1	3.20014e+08	C1,D42,E2,F86,H151,I10,L15,M1,N2,R4,S3,V9,W11,Y193	D->N(1)V(1), F->L(1)V(1)W(1)Y(9), H->D(6)E(2)I(4)L(4)N(1)R(4)S(2)V(4)Y(1), L->F(1), V->I(1), Y->C(1)F(28)H(3)I(3)L(3)M(1)S(1)W(6)
lena	I	144	0.4	7.06	1	338.74	I128,L5,M1,V3	I->L(1)V(3), L->M(1)
lena	I	255	0.63	8.51	1	1.63109e+08	A5,F2,G35,I282,K4,L112,M4,V96	A->V(2), G->A(2)F(1)I(1), I->F(1)G(1)K(1)L(14)M(1)V(35), K->A(1), L->I(12)M(2), V->I(2)L(1)M(1)
lena	I	359	1.2	1.62	1	2.04764e+06	A15,C3,F6,I247,L163,M46,S1,T1,V61,W1	I->A(4)F(1)L(5)V(9), L->A(6)C(1)F(2)I(10)M(3)V(11)W(1), M->A(2)L(11)V(2), V->A(3)C(2)F(1)I(4)L(3)M(2)S(1)T(1)
lena	I	739	0.91	2.58	1	76586.3	A1,F16,G2,I301,L23,M10,R1,T9,V180,W3	F->V(1), I->A(1)F(5)L(7)M(3)T(3)V(38)W(1), L->V(1), M->G(1)T(1), V->I(15)L(1)M(3)T(1), W->G(1)R(1)
lena	I	916	0.25	5.98	1	13205.6	A2,C4,F5,I138,L1,M1,T5,V390	F->M(1), I->T(1)V(24), V->A(2)C(2)F(2)I(21)L(1)T(2)
lena	I	923	0.74	1	1	198.97	A10,C10,F32,G1,I51,K1,L6,S2,T2,V233,Y195	F->A(2)G(1)I(2)T(1)V(1)Y(2), I->L(1)V(2), V->A(6)C(10)F(4)I(22)K(1)L(4)S(1)T(1), Y->F(1)L(1)S(1)
lena	I	1000	0.36	15.31	1	8.1094e+06	A41,F11,I131,K1,L7,M1,S287,T1,V50	A->L(1)V(2), F->I(2)K(1)S(1), I->A(3)L(3)M(1)V(16), S->A(6)T(1), V->I(2)L(1)
lena	M	146	1.01	11.72	1	703.04	A4,E2,I100,K3,M21,P1,V5,Y1	I->A(2)E(2)K(2)M(7)P(1)V(5)Y(1), M->K(1)
lena	M	219	0.92	17.26	1	27581.7	A3,E1,F2,I1,K10,L31,M82,N1,R2	K->A(1)E(1)L(1)N(1)R(1), M->A(2)F(2)I(1)K(1)L(15)R(1)
lena	M	268	0.14	11.77	1	1681.55	F5,H1,L292,M23,S1,W1,Y218	L->F(1)H(1)M(6)S(1)Y(1), M->L(1), Y->F(4)L(2)W(1)
lena	M	725	0.47	8.43	1	9.69101e+07	A2,F1,G1,H1,I16,L266,M53,P2,Q174,R1,S1,T2,V20,Y6	I->M(1)T(1), L->A(1)F(1)H(1)I(10)M(9)P(1)Q(1)S(1)V(5)Y(1), M->Q(1)Y(1), Q->M(8)T(1)V(1), V->A(1)G(1)I(2)L(1)M(1)P(1)R(1)
lena	M	727	0.32	11.83	1	4300.53	A3,G1,H1,I1,K285,L1,M12,N161,R50,S11,T6,V9,W4,Y1	K->A(2)I(1)L(1)M(5)R(2)S(1), N->R(4)S(5)T(4), R->A(1)K(1)N(2)S(1)T(1)V(2)W(2), V->H(1)M(1)T(1), W->G(1)Y(1)
lena	M	740	0.09	16.9	1	5224.85	E187,L238,M9,N5,Q107	E->L(2)M(3)N(1)Q(6), L->M(1), M->L(1), Q->E(3)M(2)
lena	M	752	1.23	7.12	1	1249357406	A22,C5,D3,E2,F4,G14,I155,K5,L37,M52,N4,Q3,R37,S16,T90,V91,W1,Y2	A->G(1)K(1)N(1)S(1)T(1)V(1), I->C(2)E(1)F(1)G(1)L(10)M(6)Q(1)R(2)T(3)V(8)W(1)Y(1), K->R(1), L->F(1)Q(1)V(1), M->I(1)K(2)L(2)Q(1)R(1)S(1)T(3)V(1), R->G(1)L(1), S->E(1)N(1), T->D(1)M(8)N(2)V(2), V->A(4)C(1)D(2)F(2)G(1)I(7)K(1)L(7)M(4)R(7)S(4)T(4)Y(1)
lena	M	1003	1.23	7.09	1	303.59	A33,C4,E7,G56,H2,I14,K64,L18,M56,Q9,R5,S3,T170,V84,Y2	A->G(2)T(1)V(1)Y(1), E->Q(1), G->A(2)I(2)K(3)L(1)R(1)V(1), H->G(1), K->A(3)E(1)G(4)I(1)M(1)Q(1)R(4)S(2)T(1)V(4)Y(1), L->M(1), M->A(1)I(2)L(6)T(3)V(4), T->A(2)E(4)I(3)L(2)M(2)Q(5)S(1)V(13), V->A(2)C(4)E(1)G(1)H(1)I(5)L(4)M(5)
lena	N	73	1.4	25.87	1	847.15	K1,N66,P23,V1	P->K(1)N(2)V(1)
lena	N	100	1.02	46.16	1	4546.16	E1,F1,N57,P1,R1,S21	N->E(1)F(1)P(1)R(1)S(6), S->N(1)
lena	N	378	1.23	3.07	1	134.91	A3,C2,D70,E54,F29,G29,H4,I10,K3,L231,M2,N22,P5,Q1,R28,S8,T2,V14,W10,Y12	D->E(1)G(3)N(2)Q(1)R(1)Y(1), E->D(13)F(2)G(9)K(1)L(4)N(5)P(1)R(2)S(1)T(1)V(2)Y(2), F->Y(1), G->D(1), L->A(1)C(1)F(10)H(1)I(9)M(2)S(1)V(6)W(4)Y(2), P->S(1), R->A(2)C(1)D(1)E(1)G(1)H(3)I(1)K(2)L(3)N(3)P(1)S(1)T(1)
lena	N	726	1.23	2.85	1	19765.2	A44,C1,D1,E15,F2,G3,H11,I1,K100,L7,M1,N21,Q36,R180,S29,T86,V8	A->N(3)R(1)S(6), E->N(1)S(1), H->F(1)G(1), K->A(1)E(3)N(1)R(10), Q->A(1)G(1)K(3)L(1)R(3)S(1), R->A(4)E(4)F(1)G(1)H(7)K(25)L(4)N(13)Q(5)S(6)T(11)V(3), S->C(1)D(1)K(1), T->A(2)I(1)K(4)L(2)M(1)N(1)Q(5)R(8)S(6)V(3)
lena	N	733	0.21	22.45	1	1325774434	A8,C1,E2,G5,L1,N32,S490,T7	A->E(2)G(1), S->A(3)C(1)G(2)L(1)N(12)T(2), T->S(1)
lena	N	917	0.61	7.64	1	66561.5	C1,F98,H1,K5,L5,N229,Y207	F->Y(4), Y->C(1)F(24)H(1)K(1)L(1)N(1)
lena	N	976	0.83	7.06	1	3.1093e+06	A14,C1,D16,E19,G15,H204,I1,K7,L3,N28,P2,Q2,R24,S62,T123,V3,Y1	A->H(1), D->E(1), E->D(1)G(1)H(1)K(1)L(1)N(2), H->D(1)N(1)S(1), N->D(1)H(1), R->A(1)D(2)E(1)G(4)K(2)S(4)T(1), S->A(1)C(1)D(3)G(3)H(1)I(1)K(1)N(1)P(2)Q(1)T(3)Y(1), T->A(3)D(3)E(6)G(3)H(1)K(3)L(2)N(14)Q(1)R(3)S(3)V(3)
lena	N	1362	1.03	6.72	1	2276.13	A2,D61,F1,G6,H2,I42,K18,L1,N21,P325,R6,S7,T7,V16,Y2	A->Y(1), D->G(1)K(1)N(8)P(2)S(2), I->H(1)L(1)P(3)T(1)V(5)Y(1), K->R(1), N->R(1), P->A(1)D(7)G(3)H(1)I(2)K(5)N(2)R(1)S(1)T(2)V(4), S->T(1), T->R(1), V->F(1)I(2)
lena	N	1372	2.81	1.12	1	564.46	A4,C3,D3,F9,G2,H3,I47,K12,L106,M2,N175,P19,Q3,R32,S6,T7,V72,W7,Y26	H->R(1)Y(1), I->F(2)L(3)R(2)T(2)V(8)Y(3), K->R(1), L->C(1)F(6)I(8)K(2)M(1)P(3)R(6)S(1)T(1)V(8)W(1)Y(6), N->D(1)G(1)H(1)K(2)Q(1)R(1)S(3)T(1)V(1)W(3)Y(2), P->D(1)K(1)V(1), R->A(2)D(1)G(1)L(2)N(1)P(1)Q(1)Y(1), S->C(1), T->S(1), V->A(2)C(1)I(2)K(2)L(4)M(1)R(3)T(2), Y->F(1)I(1)N(1)Q(1)W(1)
lena	W	76	1.08	36.02	1	7461.61	F20,W62,Y9	F->Y(1), W->F(7)Y(4), Y->F(2)
lena	W	186	2.91	2.68	1	174.09	E1,F15,G1,H1,I1,L39,N3,P16,Q1,R2,V1,W32,Y15	E->P(1)Q(1), F->V(1), L->F(4)G(1)I(1)N(3)P(2)R(2)Y(3), P->L(1), W->F(1)L(1)P(1)Y(1), Y->E(1)F(1)H(1)L(1)
lena	W	252	1.23	2.81	1	1.15868e+07	A2,D1,F70,H23,I3,K1,L146,M6,R2,S2,T2,V6,W225,Y43	F->A(1)H(1)I(1)L(13)M(1)V(1)W(2)Y(9), H->D(1)L(4)S(1)Y(2), L->A(1)F(4)H(1)M(3)R(2)S(1)T(2)V(1)W(2)Y(7), V->I(1), W->F(1)I(1)L(1)M(2)Y(3), Y->F(1)K(1)V(1)
lena	W	353	2.81	2.8	1	9.85023e+06	A73,C74,D2,E3,F5,G3,I7,K1,L72,M9,N45,P7,Q4,R10,S10,T26,V32,W144,Y14	A->D(1)F(1)G(1)M(1)S(2)W(2), C->A(1)I(1)L(3)P(1)R(1)T(4)V(1), L->A(1)C(4)E(2)I(2)M(2)Q(2)R(1)T(3)V(6)W(4)Y(2), N->C(3)F(1)L(1)M(1)R(1)Y(1), P->T(1), Q->N(1), R->A(1)L(1)S(2)V(2), S->C(1), T->A(1)D(1)L(2)N(1), V->A(4)G(1)I(4)K(1)L(3)P(1)Q(1)T(2), W->A(1)E(1)F(3)G(1)L(1)M(1)N(4)R(1)S(1)T(1)V(2)Y(9)
lena	Y	518	1.22	4.02	1	7323060387	A5,C7,D4,E1,F3,H10,I19,K1,L140,M4,N30,P1,Q15,R1,S4,T5,V64,W3,Y224	A->S(1), H->D(2)I(2)N(1)P(1)R(1)Y(2), I->L(1)Q(1)V(1), L->A(2)C(4)D(1)F(3)H(1)I(8)K(1)M(2)Q(1)S(1)T(2)V(5)Y(3), N->C(1)D(1)Q(3)S(2)V(1)W(1), Q->T(1)W(1), V->I(1)L(6)M(2)T(1), Y->E(1)I(1)L(1)T(1)V(1)W(1)
lena	Y	728	0.3	7.82	1	4.16966e+08	A1,F250,G236,H5,K1,L5,R1,V2,W1,Y44	F->A(1)G(1)H(1)L(3)V(1)W(1)Y(22), G->R(1), L->K(1)V(1), Y->F(4)
lena	Y	748	1.22	1.04	1	107.46	A145,C55,F7,G3,I37,L9,M4,S18,T5,V71,W4,Y188	A->C(9)F(2)G(3)I(1)L(3)M(1)S(14)T(3)V(11)W(1)Y(3), C->I(1)L(1)S(1)V(2), I->A(1)V(1), L->C(1), M->A(1), V->A(4)C(1)I(10)S(1)T(1), Y->C(3)F(5)I(1)T(1)W(1)
lena	Y	917	0.15	47.61	1	1.57242e+06	C1,F98,H1,K5,L5,N229,Y207	F->Y(4), Y->C(1)F(24)H(1)K(1)L(1)N(1)
lena	Y	923	0.97	2.54	1	9039.8	A10,C10,F32,G1,I51,K1,L6,S2,T2,V233,Y195	F->A(2)G(1)I(2)T(1)V(1)Y(2), I->L(1)V(2), V->A(6)C(10)F(4)I(22)K(1)L(4)S(1)T(1), Y->F(1)L(1)S(1)
lena	Y	974	0.48	2.67	1	33367.8	A1,C26,D1,F256,G2,H8,I5,L15,M1,P1,Y210	F->C(3)H(2)I(1)L(1)Y(12), H->C(1), I->H(1), L->A(1)D(1)G(2)I(1)M(1)P(1)Y(1), Y->F(1)
nega	C	212	0.07	46.62	1	17485400000000	C69,G17,L4,N221,S120	L->N(1), N->C(10), S->C(2)G(1)L(1)N(3)
nega	C	893	0.07	42.63	1	522.74	C2,D19,E208,K137,S20,T2	D->E(2), E->D(1), K->E(1)S(1)T(1), S->C(2)E(1)T(1)
nega	C	894	0.25	6.54	1	227.92	C16,F1,I1,L1,M1,P1,S63,T302,V1	S->C(2)T(1)V(1), T->C(3)F(1)I(1)L(1)M(1)P(1)S(13)
nega	D	60	0.7	30.37	1	323.04	D36,I1,K3,L16,V1	D->K(1)L(1), K->V(1), L->D(1)I(1)
nega	D	207	1.02	20.68	1	191.38	D428,E1	D->E(1)
nega	D	235	1.02	1.72	1	267.47	A31,C1,D175,E7,G51,H3,I2,K13,L3,N35,P51,R12,S38,T3	A->R(1)S(5), D->A(1)E(5)G(5)N(8)T(1), G->A(1)D(2), H->N(1), K->L(2)S(2)T(1), L->I(1), N->C(1)D(1), P->A(1)D(4)E(1)H(1)K(1)R(2)S(4)T(1), R->K(1), S->A(1)E(1)G(1)I(1)R(1)
nega	F	211	0.3	5.91	1	10096.9	F89,K1,L1,R3,W292,Y45	F->Y(1), R->K(1)L(1), W->F(9)R(1)Y(2), Y->F(4)
nega	F	215	0.68	6.99	1	273.99	A1,D45,F145,H56,I1,L4,M38,N2,Q67,W70,Y1	F->H(3)L(1)M(3)Q(2)W(7)Y(1), H->A(1)D(1)F(2)M(3)N(2)Q(4)W(1), M->I(1)L(2)Q(3), Q->L(1), W->F(2)Q(2)
nega	F	223	0.93	2.64	1	1220.01	A5,C3,F76,G2,H1,I105,L34,M61,N3,P4,Q1,R1,S2,T7,V87,Y38	A->G(1), I->A(2)C(1)F(9)L(9)M(5)R(1)S(1)T(2)V(16)Y(1), L->F(2)I(1)V(1), M->A(1)F(5)H(1)I(1)L(9)P(1)Q(1)T(2)V(2)Y(2), P->G(1), V->I(2)P(2)S(1)T(3), Y->A(1)F(2)I(1)M(1)N(1)
nega	G	210	0.27	6.88	1	188.2	A9,E52,G8,K308,Q12,R10,S26,T4,V1	E->Q(1)S(1), K->A(6)E(1)G(5)Q(3)R(2)S(6)T(3)V(1), R->G(1)S(1), S->A(1)T(1)
nega	G	224	0.84	4.14	1	130.65	A49,C16,E1,F124,G81,H2,I50,L45,M29,S7,T15,V4,W2,Y5	A->E(1)F(2)G(3)I(1)L(1)S(2)T(1), C->A(2)G(1)M(1)S(1)V(1)W(1), F->A(2)C(3)G(2)H(1)I(1)L(3)M(1)Y(2), G->A(1), I->F(2)H(1)L(3)T(2)V(3)W(1), L->F(2)M(4), M->A(3)L(2)S(3)Y(1), T->F(1)S(1)
nega	G	372	0.83	7.42	1	471386	A9,D11,E36,F2,G50,H11,I6,K24,L9,M1,N1,P43,Q3,R187,S20,T1,W1,Y15	A->G(1)I(1), E->A(4)D(5)F(1)G(7)K(1)P(1)Q(1)R(1)S(2)W(1), G->P(1), H->P(1)R(1)Y(1), K->E(1)G(2)I(1)L(1)M(1)R(2), L->I(2)K(1), P->A(1), R->A(1)D(1)E(3)G(3)H(2)K(4)L(1)N(1)P(3)S(5)T(1)Y(2), S->A(1)D(1)K(1)Q(2), Y->F(1)R(1)
nega	G	520	0.75	10.6	1	25913.2	A18,C5,D5,E1,F1,G222,H7,I14,K1,L8,N66,Q1,S23,T15,V42,Y14	A->C(2)G(1)L(1)N(1)S(1)T(1)V(3), G->A(2)E(1)H(2)I(1)N(5)Y(1), H->N(1), I->V(1), N->D(5)G(5)K(1)S(3)Y(3), S->C(1)H(1)V(1), V->I(6)L(1)T(2), Y->F(1)G(1)H(1)Q(1)
nega	G	527	1.51	28.56	1	30746.7	G442,K1,L1	G->K(1)L(1)
nega	G	720	1.05	5.59	1	914.17	A9,C7,F16,G74,H5,I102,K1,L20,M3,P1,S24,T24,V102,W8,Y46	C->G(1), F->I(1), G->F(1), I->A(2)C(3)F(4)G(1)L(2)M(1)S(1)T(4)V(5)W(1)Y(1), L->F(2)H(1)I(1)M(1)T(1)V(2), S->A(1)C(1)F(1)G(2)V(1), T->P(1)V(1), V->A(2)C(2)G(2)I(9)L(5)M(1)T(2)W(1)Y(2), Y->F(5)G(1)H(2)I(2)K(1)L(1)S(1)T(1)V(1)
nega	G	1178	2.23	2.51	1	220.54	A2,D11,E5,G267,K1,L4,N33,R3,S5,T2,V1,Y1	D->E(1)G(1), G->A(1)D(1)E(2)L(1)N(3)S(1)V(1), L->S(1), N->A(1)D(2)E(2)G(3)K(1)R(3)S(3)T(2)Y(1)
nega	I	528	0.38	1.05	0.99	100.69	C1,F68,I67,L172,M71,N30,Q3,V2,W3,Y27	F->C(1)L(1)M(1), I->L(1)M(1), L->F(1)I(10)M(1)Q(2)V(2)Y(1), M->I(1)L(4)N(1)Q(1), N->M(1), Y->F(4)L(3)W(1)
nega	I	1082	0.3	6.35	1	1025.01	A30,C2,E197,F6,G1,I45,L1,M7,N21,Q1,S5,T22,V37,Y13	A->G(1)N(1)S(2)T(2)V(1), C->A(1), E->Q(1)T(1)V(1)Y(1), I->A(3)E(1)L(1)M(2)N(2)S(1)V(2), N->I(1)S(1)T(1), T->I(1)N(1), V->A(1)C(1)F(1)I(9)M(1)T(1)Y(1), Y->F(1)
nega	K	583	0.57	2.81	1	901612	A18,D13,E1,F65,H1,I7,K233,L3,M10,N2,P6,R5,S1,T2,Y76	A->K(1)P(1)R(1)S(1), F->I(1)N(1), K->A(1)R(2)T(1), M->A(1)L(1), Y->A(2)D(3)E(1)F(5)H(1)K(3)L(2)M(2)N(1)P(1)T(1)
nega	K	890	0.41	3.01	1	24761.9	D5,E1,H49,I1,K193,M1,N78,R1,S48,V11	D->I(1), H->K(2)N(3), K->N(3), N->D(1)H(2)K(2)S(3), S->E(1)R(1)V(1), V->D(1)M(1)
nega	K	1089	0.21	2.35	1	230.49	E1,G54,K215,N1,Q9,R12,S92,T1	K->R(2), R->K(1), S->E(1)G(1)K(2)N(1)Q(1)R(1)T(1)
nega	N	205	0.4	6.75	1	170.96	A5,E11,H17,I3,M1,N83,Q2,S174,T54,V32	H->S(1), N->E(3)H(1)M(1)Q(2)S(9)V(5), S->A(3)I(1)N(5)T(2)V(2), T->N(1)S(1)V(1), V->I(2)T(1)
nega	N	212	0.14	40.97	1	3068.03	C69,G17,L4,N221,S120	L->N(1), N->C(10), S->C(2)G(1)L(1)N(3)
nega	N	709	2.81	1.1	1	24136.2	A4,D17,E53,G160,H4,I4,K18,L2,N114,P14,Q10,R26,S3,T12,Y1	D->K(1), E->A(1)D(9)G(3)H(1)I(2)K(1)N(4)P(3)Q(4)R(2)T(4), G->A(1)D(4)E(3)H(1)K(4)N(9)Q(1)T(1), K->N(1)R(2), N->A(2)D(3)G(8)H(1)K(3)L(1)P(3)Q(1)R(2)S(1), P->G(1)I(1)Q(1), R->E(1)H(1)K(3)L(1)N(1)P(1)Q(1)Y(1), T->I(1)K(1)R(1)S(2)
nega	P	97	1.01	30.66	1	1265.44	A1,G12,P42,S1	G->P(1), P->A(1)G(1)S(1)
nega	P	222	2.81	0.93	1	222.75	A57,C4,D15,E26,F14,G8,H7,I32,K4,L53,M3,N1,P150,Q7,R11,S5,T2,V21,W5,Y4	A->C(2)D(1)E(3)F(3)I(5)K(1)L(5)N(1)P(1)Q(1)S(1)T(1)V(2), C->V(1), D->I(1), E->D(2)L(2)P(1)R(1)S(1), F->I(1)L(2)V(1)W(2), I->E(2)M(1)V(2), L->F(1)H(1)I(4)M(1)P(1)V(1), P->A(3)D(8)E(6)F(2)G(6)H(4)K(2)L(3)M(1)Q(1)R(7)S(2)T(1)V(1)Y(2), Q->L(1), R->L(1)W(1), V->A(1)C(1)E(2)I(4)K(1)R(1)
nega	P	381	1.2	2.56	1	3245.28	A3,C2,D1,E42,F1,G6,H1,I8,K23,L64,M2,N5,P139,Q1,R13,S5,T2,V10,Y5	E->A(1)D(1)G(4)K(3)L(1)N(2)P(2)R(1)S(3)T(1)V(1)Y(2), I->F(1), K->N(2)Q(1)R(3)Y(1), L->A(1)C(1)I(4)K(1)M(2)R(1)V(1)Y(2), P->A(1)E(2)I(2)L(1)R(1)V(2), R->H(1)K(2), S->C(1)N(1), V->I(1)T(1)
nega	P	382	1.22	2.81	1	4.89246e+07	A34,D2,E11,F2,G7,H2,I24,K5,L6,M46,N2,P170,Q2,R2,S6,T7,V1,W1	A->D(1)E(1)G(3)I(2)K(3)M(1)N(1)Q(1)R(1)S(3)T(2)V(1)W(1), E->H(1)K(1)R(1)T(1), I->D(1)F(1)M(2)S(1), K->S(1), M->F(1)H(1)I(3)L(4), P->A(3)I(1)L(1)M(1)Q(1), T->N(1)S(1)
nega	P	506	2.81	2.56	1	1060.49	A6,D5,E7,F7,G1,H5,I36,K14,L30,M10,N11,P91,Q4,S24,T11,V33,W1,Y10	A->I(1), D->M(1), E->Q(1)W(1)Y(1), F->L(1), H->Q(1), I->E(1)K(1)L(4)M(2)V(4)Y(2), K->D(1)L(1)N(1), L->F(1)I(4), M->A(1)H(1)I(1)L(2), N->F(1)K(1), P->A(1)E(1)F(1)G(1)H(2)I(1)Q(1)S(4)T(3)V(5)Y(1), S->A(1)K(2)N(1)T(1)V(1), T->A(1)N(1)S(1)V(1), V->A(1)I(4)K(1)L(1)N(1)Q(1)S(1)T(1), Y->D(1)F(1)H(1)N(1)
nega	P	1201	2.81	2.49	1	14164.6	A14,C2,D12,E7,F9,G22,I25,K21,L92,M7,N4,P58,Q5,R8,S14,T2,V70,W15,Y53	A->D(1)G(1)M(1)P(1)S(1)V(2)W(2), D->N(1)S(1), E->D(1)K(1)Q(1)S(1), F->I(1), G->I(1), I->F(2)L(2)N(1)V(1), K->A(1)L(2)V(1), L->G(2)I(4)K(2)M(2)P(1)Q(1)R(2)V(2)W(1)Y(2), M->A(1), P->A(1)E(2)F(2)L(4)Q(1)S(1)V(1), Q->K(1), S->A(1)G(1)Q(1)Y(1), V->C(1)E(1)F(1)G(7)I(11)K(3)L(3)M(1)N(1)P(3)R(1)S(2)T(2)W(2), W->F(1)V(1), Y->C(1)L(5)N(1)R(5)
pisu	W	97	0.54	13.17	1	36501	F5,G3,H2,L2,V1,W21,Y138	Y->F(5)G(1)H(2)L(2)V(1)W(9)
pisu	W	353	0.3	8.18	1	543.61	C69,F321,M1,Q3,W38,Y36	C->W(1), F->C(2)M(1)Q(1)W(6)Y(22), W->F(2)
urv001	D	48	0.59	8.89	1	27015.7	A5,C1,D22,E11,G39,K17,L2,M3,N1,P2,R377,S3,T11,V1,Y1	D->G(1), E->D(2)K(1)S(1)T(1), G->C(1)S(1), R->A(2)D(10)E(4)G(4)K(15)L(2)M(3)N(1)P(2)S(1)T(6)V(1)Y(1)
urv001	D	491	2.81	2.37	1	1878.54	A8,C3,D78,E14,F2,G415,H2,K3,L5,N26,Q9,R4,S14,T27,Y1	A->F(1)L(1), D->E(1)G(1)N(3)Q(1)S(1), E->D(1)K(1)Q(1)S(2)T(2), G->A(4)C(2)D(18)E(5)F(1)H(1)K(2)L(3)N(11)Q(6)R(3)S(7)T(9)Y(1), N->A(1)R(1), S->C(1)H(1)N(1)T(1), T->A(1)D(1)L(1)N(1)Q(1)
urv001	D	781	2.81	2.81	1	407050980	A1,C3,D128,E13,F1,G50,H11,I9,K45,L7,M4,N301,Q8,R12,S17,T12,V1,Y2	D->C(1)E(2)G(1)H(1)L(1)N(3)Q(1)R(1)S(3), E->A(1)K(1)Q(1)S(1), G->D(1)R(1)T(1)Y(1), H->L(1), I->V(1), K->I(1)M(1)R(4)S(1), L->I(1), N->C(2)D(47)E(5)F(1)G(14)H(7)I(4)K(17)L(4)M(1)Q(1)R(4)S(7)T(9)Y(1), Q->S(1)
urv001	D	1137	0.4	4.58	1	1073.43	A1,D68,E175,F2,G1,H1,K9,Q9,T3,V4,W1	D->E(1)H(1)K(1)Q(1), E->A(1)D(15)F(2)G(1)K(4)Q(4)T(3)V(4)W(1)
urv001	W	466	0.7	6.41	1	287.26	A3,C5,D1,E6,F4,G8,H15,I3,K23,L2,M2,N28,P3,Q9,R482,S2,T8,V14,W9,Y9	E->A(1), G->T(1), H->K(1)R(1), K->H(2), N->C(1)F(1)Q(1)R(1)S(1), Q->T(1), R->C(3)D(1)E(3)F(3)G(3)H(3)I(3)K(16)L(2)M(2)N(11)P(1)Q(5)S(1)T(4)V(8)W(7)Y(5)
urv001	W	1203	1.07	24.82	1	325.68	A1,E4,F3,I10,L118,T1,V5,W5	L->A(1)E(1)F(2)I(8)T(1)V(1)W(4)
urv002	A	251	1.18	9.81	1	2680.25	A37,C1,E1,F1,I1,L13,M1,N1,V3	A->F(1)L(4)M(1)N(1)V(1), L->E(1), V->C(1)I(1)
