# Supplementary material for: Diversity and Distinctive Characteristics of the Global RNA Virome in Urban Environments
Source: Research Square preprint supplement (doi:10.21203/rs.3.rs-6735172/v1), 2025-06-26
Supplement: Supplementary file 4 [file 3f75747dbb0a14f3493399dd.xlsx]

## Sheet: Supplementary Table 11
ICTV Best-hits of RdRPs
RdRP	Besthit ID	Identity	Kingdom	Phylum	Class	Order	Family	Genus	Species	taxid	Genome.composition	Host.source	Host.source.revised	virion_host	core-virome of built env.	core-virome of non-built env.	core-virome of water env.
6134-CEM-0887|k141_1378.4	AF332868	100	Orthornavirae	Kitrinoviricota	Alsuviricetes	Martellivirales	Virgaviridae	Tobamovirus	Tomato mosaic virus	12253	ssRNA(+)	plants	Plants
6134-CEM-0887|k141_267.3	KT383474	100	Orthornavirae	Kitrinoviricota	Alsuviricetes	Martellivirales	Virgaviridae	Tobamovirus	Tomato brown rugose fruit virus	1761477	ssRNA(+)	plants	Plants		yes
6134-CEM-0887|k141_849.2	KC610514	61.16	Orthornavirae	Duplornaviricota	Chrymotiviricetes	Ghabrivirales	Totiviridae	Totivirus	Scheffersomyces segobiensis virus L	1300323	dsRNA	fungi	Fungi		yes
6134-CEM-0890|k141_15417.5	MN532632	49.24	Orthornavirae	Lenarviricota	Miaviricetes	Ourlivirales	Botourmiaviridae	Epsilonscleroulivirus	Epsilonscleroulivirus plasmoparae	2955871	ssRNA(+)	other (specify)	Others
6134-CEM-0890|k141_30236.1	JX971978	88.65	Orthornavirae	Pisuviricota	Duplopiviricetes	Durnavirales	Partitiviridae	Betapartitivirus	Red clover cryptic virus 2	1323524	dsRNA	plants	Plants
6134-CEM-0890|k141_32197.1	X01678	99.11	Orthornavirae	Kitrinoviricota	Alsuviricetes	Martellivirales	Bromoviridae	Bromovirus	Brome mosaic virus	12302	ssRNA(+)	plants	Plants
6134-CEM-0890|k141_43330.3	BK010429	79.31	Orthornavirae	Lenarviricota	Howeltoviricetes	Cryppavirales	Mitoviridae	Duamitovirus	Duamitovirus dapi1	2955778	ssRNA(+)	plants	Plants
6134-CEM-0890|k141_43761.1	MF375475	78.91	Orthornavirae	Lenarviricota	Howeltoviricetes	Cryppavirales	Mitoviridae	Duamitovirus	Duamitovirus chqu1	2955775	ssRNA(+)	plants	Plants
6134-CEM-0895|k141_62.2	KC610514	53.33	Orthornavirae	Duplornaviricota	Chrymotiviricetes	Ghabrivirales	Totiviridae	Totivirus	Scheffersomyces segobiensis virus L	1300323	dsRNA	fungi	Fungi
6134-CEM-0896|k141_186.1	KC610514	61.16	Orthornavirae	Duplornaviricota	Chrymotiviricetes	Ghabrivirales	Totiviridae	Totivirus	Scheffersomyces segobiensis virus L	1300323	dsRNA	fungi	Fungi		yes
6134-CEM-0923|k141_2167.3	AF332868	99.35	Orthornavirae	Kitrinoviricota	Alsuviricetes	Martellivirales	Virgaviridae	Tobamovirus	Tomato mosaic virus	12253	ssRNA(+)	plants	Plants
6134-CEM-0923|k141_2453.4	BK010429	53.45	Orthornavirae	Lenarviricota	Howeltoviricetes	Cryppavirales	Mitoviridae	Duamitovirus	Duamitovirus dapi1	2955778	ssRNA(+)	plants	Plants
6134-CEM-0923|k141_30000.4	MN532593	62.04	Orthornavirae	Lenarviricota	Miaviricetes	Ourlivirales	Botourmiaviridae	Magoulivirus	Magoulivirus betaplasmoparae	2956154	ssRNA(+)	other (specify)	Others
6134-CEM-0923|k141_32165.6	MN532605	58.65	Orthornavirae	Lenarviricota	Miaviricetes	Ourlivirales	Botourmiaviridae	Magoulivirus	Magoulivirus xiplasmoparae	2956177	ssRNA(+)	other (specify)	Others
6134-CEM-0923|k141_34875.6	MF375475	79.69	Orthornavirae	Lenarviricota	Howeltoviricetes	Cryppavirales	Mitoviridae	Duamitovirus	Duamitovirus chqu1	2955775	ssRNA(+)	plants	Plants
6134-CEM-0923|k141_38390.3	X06728	100	Orthornavirae	Kitrinoviricota	Alsuviricetes	Tymovirales	Alphaflexiviridae	Potexvirus	White clover mosaic virus	12188	ssRNA(+)	plants	Plants		yes
6134-CEM-0923|k141_44629.4	X01678	99.11	Orthornavirae	Kitrinoviricota	Alsuviricetes	Martellivirales	Bromoviridae	Bromovirus	Brome mosaic virus	12302	ssRNA(+)	plants	Plants
6134-CEM-0923|k141_66376.6	D12505	100	Orthornavirae	Kitrinoviricota	Alsuviricetes	Martellivirales	Virgaviridae	Tobamovirus	Cucumber green mottle mosaic virus	12235	ssRNA(+)	plants	Plants
6134-CEM-0930|k141_2196.2	U90136	37.01	Orthornavirae	Lenarviricota	Amabiliviricetes	Wolframvirales	Narnaviridae	Narnavirus	Saccharomyces 23S RNA narnavirus	198599	ssRNA(+)	fungi	Fungi
6134-CEM-0930|k141_2352.5	HM560703	72.81	Orthornavirae	Pisuviricota	Duplopiviricetes	Durnavirales	Partitiviridae	Deltapartitivirus	Beet cryptic virus 2	912029	dsRNA	plants	Plants
6134-CEM-0930|k141_2441.5	AF039063	48.44	Orthornavirae	Lenarviricota	Amabiliviricetes	Wolframvirales	Narnaviridae	Narnavirus	Saccharomyces 20S RNA narnavirus	186772	ssRNA(+)	fungi	Fungi
6134-CEM-0930|k141_2446.1	U90136	33.82	Orthornavirae	Lenarviricota	Amabiliviricetes	Wolframvirales	Narnaviridae	Narnavirus	Saccharomyces 23S RNA narnavirus	198599	ssRNA(+)	fungi	Fungi
6134-CEM-0930|k141_2574.5	U90136	44.28	Orthornavirae	Lenarviricota	Amabiliviricetes	Wolframvirales	Narnaviridae	Narnavirus	Saccharomyces 23S RNA narnavirus	198599	ssRNA(+)	fungi	Fungi
6134-CEM-0930|k141_3347.4	AJ440010	40.19	Orthornavirae	Kitrinoviricota	Alsuviricetes	Martellivirales	Closteroviridae	Olivavirus	Olive leaf yellowing-associated virus	82791	ssRNA(+)	plants	Plants
6134-CEM-0930|k141_5895.3	U90136	36.51	Orthornavirae	Lenarviricota	Amabiliviricetes	Wolframvirales	Narnaviridae	Narnavirus	Saccharomyces 23S RNA narnavirus	198599	ssRNA(+)	fungi	Fungi
6134-CEM-0930|k141_5948.2	U90136	37.01	Orthornavirae	Lenarviricota	Amabiliviricetes	Wolframvirales	Narnaviridae	Narnavirus	Saccharomyces 23S RNA narnavirus	198599	ssRNA(+)	fungi	Fungi
6134-CEM-0930|k141_6060.3	M33002	46.4	Orthornavirae	Kitrinoviricota	Tolucaviricetes	Tolivirales	Tombusviridae	Alphanecrovirus	Tobacco necrosis virus A	12055	ssRNA(+)	plants	Plants
6134-CEM-0930|k141_6394.5	EU919669	32.17	Orthornavirae	Kitrinoviricota	Alsuviricetes	Martellivirales	Bromoviridae	Ilarvirus	Lilac ring mottle virus	37125	ssRNA(+)	plants	Plants
6134-CEM-0930|k141_6459.6	AF039063	46.83	Orthornavirae	Lenarviricota	Amabiliviricetes	Wolframvirales	Narnaviridae	Narnavirus	Saccharomyces 20S RNA narnavirus	186772	ssRNA(+)	fungi	Fungi
6134-CEM-0930|k141_908.4	U90136	37.93	Orthornavirae	Lenarviricota	Amabiliviricetes	Wolframvirales	Narnaviridae	Narnavirus	Saccharomyces 23S RNA narnavirus	198599	ssRNA(+)	fungi	Fungi
6134-CEM-0935|k141_540.3	KC610514	59.17	Orthornavirae	Duplornaviricota	Chrymotiviricetes	Ghabrivirales	Totiviridae	Totivirus	Scheffersomyces segobiensis virus L	1300323	dsRNA	fungi	Fungi
6134-CEM-0936|k141_140.6	KC610514	61.16	Orthornavirae	Duplornaviricota	Chrymotiviricetes	Ghabrivirales	Totiviridae	Totivirus	Scheffersomyces segobiensis virus L	1300323	dsRNA	fungi	Fungi
6134-CEM-0936|k141_1545.4	FJ528584	46.55	Orthornavirae	Pisuviricota	Pisoniviricetes	Picornavirales	Solinviviridae	Invictavirus	Solenopsis invicta virus 3	631345	ssRNA(+)	invertebrates	Invertebrates
6134-CEM-0936|k141_815.1	MN908947	100	Orthornavirae	Pisuviricota	Pisoniviricetes	Nidovirales	Coronaviridae	Betacoronavirus	Severe acute respiratory syndrome-related coronavirus	694009	ssRNA(+)	vertebrates	Vertebrates	human
6134-CEM-0936|k141_921.2	KC610514	61.16	Orthornavirae	Duplornaviricota	Chrymotiviricetes	Ghabrivirales	Totiviridae	Totivirus	Scheffersomyces segobiensis virus L	1300323	dsRNA	fungi	Fungi
6134-CEM-0951|k141_1910.1	KC610514	61.16	Orthornavirae	Duplornaviricota	Chrymotiviricetes	Ghabrivirales	Totiviridae	Totivirus	Scheffersomyces segobiensis virus L	1300323	dsRNA	fungi	Fungi
6134-CEM-0951|k141_423.5	KC610514	60.33	Orthornavirae	Duplornaviricota	Chrymotiviricetes	Ghabrivirales	Totiviridae	Totivirus	Scheffersomyces segobiensis virus L	1300323	dsRNA	fungi	Fungi
6134-CEM-0954|k141_10788.4	X01678	99.11	Orthornavirae	Kitrinoviricota	Alsuviricetes	Martellivirales	Bromoviridae	Bromovirus	Brome mosaic virus	12302	ssRNA(+)	plants	Plants
6134-CEM-0954|k141_14575.6	MN532653	61.72	Orthornavirae	Lenarviricota	Miaviricetes	Ourlivirales	Botourmiaviridae	Scleroulivirus	Scleroulivirus zetaplasmoparae	2956423	ssRNA(+)	other (specify)	Others
6134-CEM-0954|k141_21724.4	MK584845	66.35	Orthornavirae	Lenarviricota	Miaviricetes	Ourlivirales	Botourmiaviridae	Magoulivirus	Acremonium magoulivirus	2843642	ssRNA(+)	fungi	Fungi
6134-CEM-0954|k141_582.6	D12505	100	Orthornavirae	Kitrinoviricota	Alsuviricetes	Martellivirales	Virgaviridae	Tobamovirus	Cucumber green mottle mosaic virus	12235	ssRNA(+)	plants	Plants
6134-CEM-0954|k141_9036.1	U90136	35.2	Orthornavirae	Lenarviricota	Amabiliviricetes	Wolframvirales	Narnaviridae	Narnavirus	Saccharomyces 23S RNA narnavirus	198599	ssRNA(+)	fungi	Fungi
6134-CEM-0967|k141_2813.4	KC610514	60.33	Orthornavirae	Duplornaviricota	Chrymotiviricetes	Ghabrivirales	Totiviridae	Totivirus	Scheffersomyces segobiensis virus L	1300323	dsRNA	fungi	Fungi
6134-CEM-0967|k141_4589.4	V01408	100	Orthornavirae	Kitrinoviricota	Alsuviricetes	Martellivirales	Virgaviridae	Tobamovirus	Tobacco mosaic virus	12242	ssRNA(+)	plants	Plants
6134-CEM-0969|k141_1123.1	HQ228213	29.73	Orthornavirae	Duplornaviricota	Chrymotiviricetes	Ghabrivirales	Chrysoviridae	Betachrysovirus	Betachrysovirus fugramineari	2560478	dsRNA	fungi	Fungi
6134-CEM-0974|k141_5684.1	KC610514	61.16	Orthornavirae	Duplornaviricota	Chrymotiviricetes	Ghabrivirales	Totiviridae	Totivirus	Scheffersomyces segobiensis virus L	1300323	dsRNA	fungi	Fungi
6134-CEM-0986|k141_1223.3	EF198241	50	Orthornavirae	Pisuviricota	Pisoniviricetes	Picornavirales	Marnaviridae	Sogarnavirus	Jericarnavirus A	2560534	ssRNA(+)	marine (S)	Others
6134-CEM-0986|k141_1241.1	KF412901	50.44	Orthornavirae	Pisuviricota	Pisoniviricetes	Picornavirales	Marnaviridae	Locarnavirus	Sanfarnavirus 2	2560739	ssRNA(+)	marine (S)	Others
6134-CEM-0986|k141_1278.3	JN661160	34.92	Orthornavirae	Pisuviricota	Pisoniviricetes	Picornavirales	Marnaviridae	Locarnavirus	Sanfarnavirus 1	2560738	ssRNA(+)	marine (S)	Others
6134-CEM-0986|k141_282.5	AJ557804	52.79	Orthornavirae	Kitrinoviricota	Tolucaviricetes	Tolivirales	Tombusviridae	Aureusvirus	Johnsongrass chlorotic stripe mosaic virus	229149	ssRNA(+)	plants	Plants
6134-CEM-0986|k141_337.1	AF452884	24.07	Orthornavirae	Kitrinoviricota	Tolucaviricetes	Tolivirales	Tombusviridae	Betanecrovirus	Beet black scorch virus	196375	ssRNA(+)	plants	Plants
6134-CEM-0986|k141_627.4	MN532596	38.05	Orthornavirae	Lenarviricota	Miaviricetes	Ourlivirales	Botourmiaviridae	Magoulivirus	Magoulivirus epsilonplasmoparae	2956156	ssRNA(+)	other (specify)	Others
6134-CEM-0986|k141_720.4	AF183905	31.72	Orthornavirae	Pisuviricota	Pisoniviricetes	Picornavirales	Dicistroviridae	Triatovirus	Black queen cell virus	92395	ssRNA(+)	invertebrates	Invertebrates
6134-CEM-0986|k141_879.4	U57305	35.37	Orthornavirae	Kitrinoviricota	Tolucaviricetes	Tolivirales	Tombusviridae	Umbravirus	Carrot mottle mimic virus	47736	ssRNA(+)	plants	Plants		yes
6134-CEM-0986|k141_980.6	AB375474	46.24	Orthornavirae	Pisuviricota	Pisoniviricetes	Picornavirales	Marnaviridae	Bacillarnavirus	Chaetoceros tenuissimus RNA virus 01	497136	ssRNA(+)	algae	Algae
6134-CEM-0988|k141_1088.3	JN661160	34.92	Orthornavirae	Pisuviricota	Pisoniviricetes	Picornavirales	Marnaviridae	Locarnavirus	Sanfarnavirus 1	2560738	ssRNA(+)	marine (S)	Others
6134-CEM-0988|k141_1233.6	EF198241	49.46	Orthornavirae	Pisuviricota	Pisoniviricetes	Picornavirales	Marnaviridae	Sogarnavirus	Jericarnavirus A	2560534	ssRNA(+)	marine (S)	Others
6134-CEM-0988|k141_1339.5	EF198242	46.77	Orthornavirae	Pisuviricota	Pisoniviricetes	Picornavirales	Marnaviridae	Locarnavirus	Jericarnavirus B	2560535	ssRNA(+)	marine (S)	Others		yes
6134-CEM-0988|k141_1432.3	KF412901	49.72	Orthornavirae	Pisuviricota	Pisoniviricetes	Picornavirales	Marnaviridae	Locarnavirus	Sanfarnavirus 2	2560739	ssRNA(+)	marine (S)	Others
6134-CEM-0988|k141_1562.3	EF198241	48.92	Orthornavirae	Pisuviricota	Pisoniviricetes	Picornavirales	Marnaviridae	Sogarnavirus	Jericarnavirus A	2560534	ssRNA(+)	marine (S)	Others
6134-CEM-0988|k141_1603.2	U57305	35.37	Orthornavirae	Kitrinoviricota	Tolucaviricetes	Tolivirales	Tombusviridae	Umbravirus	Carrot mottle mimic virus	47736	ssRNA(+)	plants	Plants
6134-CEM-0988|k141_1796.5	AF183905	31.72	Orthornavirae	Pisuviricota	Pisoniviricetes	Picornavirales	Dicistroviridae	Triatovirus	Black queen cell virus	92395	ssRNA(+)	invertebrates	Invertebrates
6134-CEM-0988|k141_1814.1	AJ557804	52.79	Orthornavirae	Kitrinoviricota	Tolucaviricetes	Tolivirales	Tombusviridae	Aureusvirus	Johnsongrass chlorotic stripe mosaic virus	229149	ssRNA(+)	plants	Plants
6134-CEM-0988|k141_857.3	EU770620	42.86	Orthornavirae	Lenarviricota	Miaviricetes	Ourlivirales	Botourmiaviridae	Ourmiavirus	Epirus cherry virus	544686	ssRNA(+)	plants	Plants
6134-CEM-0988|k141_867.2	AF452884	24.07	Orthornavirae	Kitrinoviricota	Tolucaviricetes	Tolivirales	Tombusviridae	Betanecrovirus	Beet black scorch virus	196375	ssRNA(+)	plants	Plants
6134-CEM-0990|k141_7722.6	MF375475	80.61	Orthornavirae	Lenarviricota	Howeltoviricetes	Cryppavirales	Mitoviridae	Duamitovirus	Duamitovirus chqu1	2955775	ssRNA(+)	plants	Plants
6134-CEM-0991|k141_4404.2	EU118277	37.5	Orthornavirae	Pisuviricota	Duplopiviricetes	Durnavirales	Partitiviridae	Gammapartitivirus	Aspergillus ochraceous virus	358008	dsRNA	fungi	Fungi
6134-CEM-0995|k141_1238.2	AF277675	38.46	Orthornavirae	Pisuviricota	Pisoniviricetes	Picornavirales	Dicistroviridae	Aparavirus	Taura syndrome virus	142102	ssRNA(+)	invertebrates	Invertebrates
6134-CEM-0995|k141_1395.4	AB193726	41.54	Orthornavirae	Pisuviricota	Pisoniviricetes	Picornavirales	Marnaviridae	Labyrnavirus	Aurantiochytrium single-stranded RNA virus 01	674971	ssRNA(+)	algae	Algae
6134-CEM-0995|k141_1402.6	AF183905	31.72	Orthornavirae	Pisuviricota	Pisoniviricetes	Picornavirales	Dicistroviridae	Triatovirus	Black queen cell virus	92395	ssRNA(+)	invertebrates	Invertebrates
6134-CEM-0995|k141_1432.5	AB375474	46.02	Orthornavirae	Pisuviricota	Pisoniviricetes	Picornavirales	Marnaviridae	Bacillarnavirus	Chaetoceros tenuissimus RNA virus 01	497136	ssRNA(+)	algae	Algae
6134-CEM-0995|k141_1616.6	U57305	35.37	Orthornavirae	Kitrinoviricota	Tolucaviricetes	Tolivirales	Tombusviridae	Umbravirus	Carrot mottle mimic virus	47736	ssRNA(+)	plants	Plants
6134-CEM-0995|k141_1781.1	KF412901	49.72	Orthornavirae	Pisuviricota	Pisoniviricetes	Picornavirales	Marnaviridae	Locarnavirus	Sanfarnavirus 2	2560739	ssRNA(+)	marine (S)	Others
6134-CEM-0995|k141_2011.2	MN532666	36.31	Orthornavirae	Lenarviricota	Miaviricetes	Ourlivirales	Botourmiaviridae	Scleroulivirus	Scleroulivirus sigmaplasmoparae	2956420	ssRNA(+)	other (specify)	Others
6134-CEM-0995|k141_2381.2	AB639040	42.73	Orthornavirae	Pisuviricota	Pisoniviricetes	Picornavirales	Marnaviridae	Sogarnavirus	Chaetarnavirus 2	2560376	ssRNA(+)	algae	Algae
6134-CEM-0995|k141_261.5	JN661160	34.92	Orthornavirae	Pisuviricota	Pisoniviricetes	Picornavirales	Marnaviridae	Locarnavirus	Sanfarnavirus 1	2560738	ssRNA(+)	marine (S)	Others
6134-CEM-0995|k141_278.1	AF452884	24.07	Orthornavirae	Kitrinoviricota	Tolucaviricetes	Tolivirales	Tombusviridae	Betanecrovirus	Beet black scorch virus	196375	ssRNA(+)	plants	Plants
6134-CEM-0995|k141_437.1	EF198241	49.46	Orthornavirae	Pisuviricota	Pisoniviricetes	Picornavirales	Marnaviridae	Sogarnavirus	Jericarnavirus A	2560534	ssRNA(+)	marine (S)	Others
6134-CEM-0995|k141_830.2	AJ557804	52.79	Orthornavirae	Kitrinoviricota	Tolucaviricetes	Tolivirales	Tombusviridae	Aureusvirus	Johnsongrass chlorotic stripe mosaic virus	229149	ssRNA(+)	plants	Plants
6134-CEM-0995|k141_86.3	MN532596	35.13	Orthornavirae	Lenarviricota	Miaviricetes	Ourlivirales	Botourmiaviridae	Magoulivirus	Magoulivirus epsilonplasmoparae	2956156	ssRNA(+)	other (specify)	Others
6134-CEM-0995|k141_916.5	M33002	55.56	Orthornavirae	Kitrinoviricota	Tolucaviricetes	Tolivirales	Tombusviridae	Alphanecrovirus	Tobacco necrosis virus A	12055	ssRNA(+)	plants	Plants
6134-CEM-0996|k141_1074.4	AF183905	31.72	Orthornavirae	Pisuviricota	Pisoniviricetes	Picornavirales	Dicistroviridae	Triatovirus	Black queen cell virus	92395	ssRNA(+)	invertebrates	Invertebrates
6134-CEM-0996|k141_1150.2	EF198241	49.46	Orthornavirae	Pisuviricota	Pisoniviricetes	Picornavirales	Marnaviridae	Sogarnavirus	Jericarnavirus A	2560534	ssRNA(+)	marine (S)	Others
6134-CEM-0996|k141_1484.4	EF198242	46.77	Orthornavirae	Pisuviricota	Pisoniviricetes	Picornavirales	Marnaviridae	Locarnavirus	Jericarnavirus B	2560535	ssRNA(+)	marine (S)	Others
6134-CEM-0996|k141_1620.3	AF014388	35.75	Orthornavirae	Pisuviricota	Pisoniviricetes	Picornavirales	Dicistroviridae	Cripavirus	Drosophila C virus	64279	ssRNA(+)	invertebrates	Invertebrates
6134-CEM-0996|k141_2058.1	KF412901	49.72	Orthornavirae	Pisuviricota	Pisoniviricetes	Picornavirales	Marnaviridae	Locarnavirus	Sanfarnavirus 2	2560739	ssRNA(+)	marine (S)	Others
6134-CEM-0996|k141_2273.3	AJ557804	52.79	Orthornavirae	Kitrinoviricota	Tolucaviricetes	Tolivirales	Tombusviridae	Aureusvirus	Johnsongrass chlorotic stripe mosaic virus	229149	ssRNA(+)	plants	Plants
6134-CEM-0996|k141_2652.3	U57305	35.37	Orthornavirae	Kitrinoviricota	Tolucaviricetes	Tolivirales	Tombusviridae	Umbravirus	Carrot mottle mimic virus	47736	ssRNA(+)	plants	Plants
6134-CEM-0996|k141_2886.5	AB639040	46.33	Orthornavirae	Pisuviricota	Pisoniviricetes	Picornavirales	Marnaviridae	Sogarnavirus	Chaetarnavirus 2	2560376	ssRNA(+)	algae	Algae
6134-CEM-0996|k141_2954.1	JN205461	31.86	Orthornavirae	Pisuviricota	Pisoniviricetes	Picornavirales	Picornaviridae	Enterovirus	Rhinovirus C	463676	ssRNA(+)	vertebrates	Vertebrates	human
6134-CEM-0996|k141_3047.1	MN532666	36.31	Orthornavirae	Lenarviricota	Miaviricetes	Ourlivirales	Botourmiaviridae	Scleroulivirus	Scleroulivirus sigmaplasmoparae	2956420	ssRNA(+)	other (specify)	Others
6134-CEM-0996|k141_3359.5	AF277675	40.62	Orthornavirae	Pisuviricota	Pisoniviricetes	Picornavirales	Dicistroviridae	Aparavirus	Taura syndrome virus	142102	ssRNA(+)	invertebrates	Invertebrates
6134-CEM-0996|k141_3429.2	JN661160	34.92	Orthornavirae	Pisuviricota	Pisoniviricetes	Picornavirales	Marnaviridae	Locarnavirus	Sanfarnavirus 1	2560738	ssRNA(+)	marine (S)	Others
6134-CEM-0996|k141_3507.6	KT727024	51.24	Orthornavirae	Pisuviricota	Pisoniviricetes	Picornavirales	Marnaviridae	Sogarnavirus	Palmarnavirus 156	2560621	ssRNA(+)	marine (S)	Others
6134-CEM-0996|k141_3695.2	KF478836	49.19	Orthornavirae	Pisuviricota	Pisoniviricetes	Picornavirales	Marnaviridae	Locarnavirus	Sanfarnavirus 3	2560740	ssRNA(+)	marine (S)	Others
6134-CEM-0996|k141_3715.2	AF452884	24.07	Orthornavirae	Kitrinoviricota	Tolucaviricetes	Tolivirales	Tombusviridae	Betanecrovirus	Beet black scorch virus	196375	ssRNA(+)	plants	Plants
6134-CEM-0996|k141_880.1	AF171942	43.37	Orthornavirae	Kitrinoviricota	Magsaviricetes	Nodamuvirales	Nodaviridae	Alphanodavirus	Pariacoto virus	103782	ssRNA(+)	invertebrates	Invertebrates
6134-CEM-0996|k141_975.3	MN532665	29.33	Orthornavirae	Lenarviricota	Miaviricetes	Ourlivirales	Botourmiaviridae	Scleroulivirus	Scleroulivirus rhoplasmoparae	2956419	ssRNA(+)	other (specify)	Others
6134-CEM-0999|k141_1338.6	EF219380	42.55	Orthornavirae	Pisuviricota	Pisoniviricetes	Picornavirales	Dicistroviridae	Aparavirus	Israeli acute paralysis virus	294365	ssRNA(+)	invertebrates	Invertebrates
6134-CEM-0999|k141_849.5	MN605482	31.25	Orthornavirae	Lenarviricota	Miaviricetes	Ourlivirales	Botourmiaviridae	Botoulivirus	Botoulivirus etabotrytidis	2955524	ssRNA(+)	fungi	Fungi
6134-CEM-1009|k141_8239.6	KC610514	60.33	Orthornavirae	Duplornaviricota	Chrymotiviricetes	Ghabrivirales	Totiviridae	Totivirus	Scheffersomyces segobiensis virus L	1300323	dsRNA	fungi	Fungi
6134-CEM-1010|k141_1056.1	JN661160	34.92	Orthornavirae	Pisuviricota	Pisoniviricetes	Picornavirales	Marnaviridae	Locarnavirus	Sanfarnavirus 1	2560738	ssRNA(+)	marine (S)	Others
6134-CEM-1010|k141_281.4	AF452884	24.07	Orthornavirae	Kitrinoviricota	Tolucaviricetes	Tolivirales	Tombusviridae	Betanecrovirus	Beet black scorch virus	196375	ssRNA(+)	plants	Plants
6134-CEM-1010|k141_868.1	EF198241	50	Orthornavirae	Pisuviricota	Pisoniviricetes	Picornavirales	Marnaviridae	Sogarnavirus	Jericarnavirus A	2560534	ssRNA(+)	marine (S)	Others
6134-CEM-1012|k141_1283.1	AF452884	24.07	Orthornavirae	Kitrinoviricota	Tolucaviricetes	Tolivirales	Tombusviridae	Betanecrovirus	Beet black scorch virus	196375	ssRNA(+)	plants	Plants
6134-CEM-1012|k141_1706.3	AF183905	31.72	Orthornavirae	Pisuviricota	Pisoniviricetes	Picornavirales	Dicistroviridae	Triatovirus	Black queen cell virus	92395	ssRNA(+)	invertebrates	Invertebrates
6134-CEM-1012|k141_1883.6	AB639040	50.38	Orthornavirae	Pisuviricota	Pisoniviricetes	Picornavirales	Marnaviridae	Sogarnavirus	Chaetarnavirus 2	2560376	ssRNA(+)	algae	Algae
6134-CEM-1012|k141_189.2	EF198242	33.96	Orthornavirae	Pisuviricota	Pisoniviricetes	Picornavirales	Marnaviridae	Locarnavirus	Jericarnavirus B	2560535	ssRNA(+)	marine (S)	Others
6134-CEM-1012|k141_197.2	AY038069	39.82	Orthornavirae	Kitrinoviricota	Tolucaviricetes	Tolivirales	Tombusviridae	Pelarspovirus	Pelargonium chlorotic ring pattern virus	167021	ssRNA(+)	plants	Plants
6134-CEM-1012|k141_2432.3	EF198241	50	Orthornavirae	Pisuviricota	Pisoniviricetes	Picornavirales	Marnaviridae	Sogarnavirus	Jericarnavirus A	2560534	ssRNA(+)	marine (S)	Others
6134-CEM-1012|k141_2928.5	KF412901	50.82	Orthornavirae	Pisuviricota	Pisoniviricetes	Picornavirales	Marnaviridae	Locarnavirus	Sanfarnavirus 2	2560739	ssRNA(+)	marine (S)	Others
6134-CEM-1012|k141_2959.4	EF198242	46.77	Orthornavirae	Pisuviricota	Pisoniviricetes	Picornavirales	Marnaviridae	Locarnavirus	Jericarnavirus B	2560535	ssRNA(+)	marine (S)	Others
6134-CEM-1012|k141_3387.2	JN661160	34.92	Orthornavirae	Pisuviricota	Pisoniviricetes	Picornavirales	Marnaviridae	Locarnavirus	Sanfarnavirus 1	2560738	ssRNA(+)	marine (S)	Others
6134-CEM-1012|k141_749.1	MN532665	29.33	Orthornavirae	Lenarviricota	Miaviricetes	Ourlivirales	Botourmiaviridae	Scleroulivirus	Scleroulivirus rhoplasmoparae	2956419	ssRNA(+)	other (specify)	Others
6134-CEM-1012|k141_775.6	JQ922308	41.94	Orthornavirae	Negarnaviricota	Insthoviricetes	Articulavirales	Orthomyxoviridae	Gammainfluenzavirus	Gammainfluenzavirus influenzae	NA	ssRNA(-)	vertebrates	Vertebrates
6134-CEM-1018|k141_934.2	KC610514	60.33	Orthornavirae	Duplornaviricota	Chrymotiviricetes	Ghabrivirales	Totiviridae	Totivirus	Scheffersomyces segobiensis virus L	1300323	dsRNA	fungi	Fungi
6134-CEM-1019|k141_1474.4	EF198241	49.46	Orthornavirae	Pisuviricota	Pisoniviricetes	Picornavirales	Marnaviridae	Sogarnavirus	Jericarnavirus A	2560534	ssRNA(+)	marine (S)	Others
6134-CEM-1019|k141_1560.5	AB971661	42.96	Orthornavirae	Pisuviricota	Pisoniviricetes	Picornavirales	Marnaviridae	Sogarnavirus	Chaetenuissarnavirus II	NA	ssRNA(+)	algae	Algae
6134-CEM-1019|k141_1746.4	AF452884	36.36	Orthornavirae	Kitrinoviricota	Tolucaviricetes	Tolivirales	Tombusviridae	Betanecrovirus	Beet black scorch virus	196375	ssRNA(+)	plants	Plants
6134-CEM-1019|k141_1936.2	AF452884	24.07	Orthornavirae	Kitrinoviricota	Tolucaviricetes	Tolivirales	Tombusviridae	Betanecrovirus	Beet black scorch virus	196375	ssRNA(+)	plants	Plants
6134-CEM-1019|k141_2061.3	JN661160	34.92	Orthornavirae	Pisuviricota	Pisoniviricetes	Picornavirales	Marnaviridae	Locarnavirus	Sanfarnavirus 1	2560738	ssRNA(+)	marine (S)	Others
6134-CEM-1019|k141_579.5	AF183905	31.72	Orthornavirae	Pisuviricota	Pisoniviricetes	Picornavirales	Dicistroviridae	Triatovirus	Black queen cell virus	92395	ssRNA(+)	invertebrates	Invertebrates
6134-CEM-1019|k141_672.4	KP900921	33.93	Orthornavirae	Lenarviricota	Miaviricetes	Ourlivirales	Botourmiaviridae	Magoulivirus	Rhizoctonia magoulivirus 1	2560704	ssRNA(+)	fungi	Fungi
6134-CEM-1019|k141_782.2	KF412901	49.72	Orthornavirae	Pisuviricota	Pisoniviricetes	Picornavirales	Marnaviridae	Locarnavirus	Sanfarnavirus 2	2560739	ssRNA(+)	marine (S)	Others
6134-CEM-1024|k141_24371.6	V01408	100	Orthornavirae	Kitrinoviricota	Alsuviricetes	Martellivirales	Virgaviridae	Tobamovirus	Tobacco mosaic virus	12242	ssRNA(+)	plants	Plants
6134-CEM-1024|k141_27929.2	KC610514	61.16	Orthornavirae	Duplornaviricota	Chrymotiviricetes	Ghabrivirales	Totiviridae	Totivirus	Scheffersomyces segobiensis virus L	1300323	dsRNA	fungi	Fungi
6134-CEM-1024|k141_4762.5	D12505	100	Orthornavirae	Kitrinoviricota	Alsuviricetes	Martellivirales	Virgaviridae	Tobamovirus	Cucumber green mottle mosaic virus	12235	ssRNA(+)	plants	Plants
6134-CEM-1024|k141_6996.2	X01678	97.32	Orthornavirae	Kitrinoviricota	Alsuviricetes	Martellivirales	Bromoviridae	Bromovirus	Brome mosaic virus	12302	ssRNA(+)	plants	Plants
6134-CEM-1031|k141_2475.3	AM040148	44.09	Orthornavirae	Pisuviricota	Duplopiviricetes	Durnavirales	Partitiviridae	Gammapartitivirus	Penicillium stoloniferum virus S	216371	dsRNA	fungi	Fungi
6134-CEM-1031|k141_4075.5	MN448505	31.58	Orthornavirae	Lenarviricota	Howeltoviricetes	Cryppavirales	Mitoviridae	Triamitovirus	Triamitovirus rhso39	2956551	ssRNA(+)	fungi	Fungi
6134-CEM-1033|k141_300.6	JN661160	34.92	Orthornavirae	Pisuviricota	Pisoniviricetes	Picornavirales	Marnaviridae	Locarnavirus	Sanfarnavirus 1	2560738	ssRNA(+)	marine (S)	Others
6134-CEM-1033|k141_429.3	AF452884	24.07	Orthornavirae	Kitrinoviricota	Tolucaviricetes	Tolivirales	Tombusviridae	Betanecrovirus	Beet black scorch virus	196375	ssRNA(+)	plants	Plants
6134-CEM-1033|k141_468.6	EF198241	50.78	Orthornavirae	Pisuviricota	Pisoniviricetes	Picornavirales	Marnaviridae	Sogarnavirus	Jericarnavirus A	2560534	ssRNA(+)	marine (S)	Others
6134-CEM-1036|k141_127.4	MN532625	64.15	Orthornavirae	Lenarviricota	Miaviricetes	Ourlivirales	Botourmiaviridae	Betascleroulivirus	Betascleroulivirus deltaplasmoparae	2955480	ssRNA(+)	other (specify)	Others
6134-CEM-1036|k141_74.6	KP900921	70.08	Orthornavirae	Lenarviricota	Miaviricetes	Ourlivirales	Botourmiaviridae	Magoulivirus	Rhizoctonia magoulivirus 1	2560704	ssRNA(+)	fungi	Fungi
6134-CEM-1037|k141_153.4	BK013438	44.44	Orthornavirae	Lenarviricota	Leviviricetes	Timlovirales	Steitzviridae	Stehnavirus	Stehnavirus chorovicinum	2846386	ssRNA(+)	bacteria	Bacteria
6134-CEM-1037|k141_23981.2	X01678	99.11	Orthornavirae	Kitrinoviricota	Alsuviricetes	Martellivirales	Bromoviridae	Bromovirus	Brome mosaic virus	12302	ssRNA(+)	plants	Plants
6134-CEM-1037|k141_5545.2	D12505	100	Orthornavirae	Kitrinoviricota	Alsuviricetes	Martellivirales	Virgaviridae	Tobamovirus	Cucumber green mottle mosaic virus	12235	ssRNA(+)	plants	Plants
6134-CEM-1039|k141_4161.4	D12505	100	Orthornavirae	Kitrinoviricota	Alsuviricetes	Martellivirales	Virgaviridae	Tobamovirus	Cucumber green mottle mosaic virus	12235	ssRNA(+)	plants	Plants
6134-CEM-1041|k141_181.2	AF452884	26.42	Orthornavirae	Kitrinoviricota	Tolucaviricetes	Tolivirales	Tombusviridae	Betanecrovirus	Beet black scorch virus	196375	ssRNA(+)	plants	Plants
6134-CEM-1041|k141_182.6	EF198241	50.78	Orthornavirae	Pisuviricota	Pisoniviricetes	Picornavirales	Marnaviridae	Sogarnavirus	Jericarnavirus A	2560534	ssRNA(+)	marine (S)	Others
6134-CEM-1041|k141_450.6	AB973945	43.75	Orthornavirae	Pisuviricota	Pisoniviricetes	Picornavirales	Marnaviridae	Kusarnavirus	Astarnavirus	2560308	ssRNA(+)	algae	Algae
6134-CEM-1041|k141_468.6	EF198242	33.96	Orthornavirae	Pisuviricota	Pisoniviricetes	Picornavirales	Marnaviridae	Locarnavirus	Jericarnavirus B	2560535	ssRNA(+)	marine (S)	Others
6134-CEM-1041|k141_721.4	X83964	56.52	Orthornavirae	Kitrinoviricota	Tolucaviricetes	Tolivirales	Tombusviridae	Avenavirus	Oat chlorotic stunt virus	146762	ssRNA	plants	Plants
6134-CEM-1042|k141_1992.1	AF452884	24.07	Orthornavirae	Kitrinoviricota	Tolucaviricetes	Tolivirales	Tombusviridae	Betanecrovirus	Beet black scorch virus	196375	ssRNA(+)	plants	Plants
6134-CEM-1042|k141_2107.1	AB971661	42.96	Orthornavirae	Pisuviricota	Pisoniviricetes	Picornavirales	Marnaviridae	Sogarnavirus	Chaetenuissarnavirus II	NA	ssRNA(+)	algae	Algae
6134-CEM-1042|k141_3213.2	X83964	50.91	Orthornavirae	Kitrinoviricota	Tolucaviricetes	Tolivirales	Tombusviridae	Avenavirus	Oat chlorotic stunt virus	146762	ssRNA	plants	Plants
6134-CEM-1042|k141_3359.3	EF219380	33.68	Orthornavirae	Pisuviricota	Pisoniviricetes	Picornavirales	Dicistroviridae	Aparavirus	Israeli acute paralysis virus	294365	ssRNA(+)	invertebrates	Invertebrates
6134-CEM-1042|k141_3574.5	MN532665	29.25	Orthornavirae	Lenarviricota	Miaviricetes	Ourlivirales	Botourmiaviridae	Scleroulivirus	Scleroulivirus rhoplasmoparae	2956419	ssRNA(+)	other (specify)	Others
6134-CEM-1042|k141_444.2	EF198241	49.46	Orthornavirae	Pisuviricota	Pisoniviricetes	Picornavirales	Marnaviridae	Sogarnavirus	Jericarnavirus A	2560534	ssRNA(+)	marine (S)	Others
6134-CEM-1042|k141_666.4	JN661160	34.92	Orthornavirae	Pisuviricota	Pisoniviricetes	Picornavirales	Marnaviridae	Locarnavirus	Sanfarnavirus 1	2560738	ssRNA(+)	marine (S)	Others
6134-CEM-1042|k141_722.5	U57305	35.37	Orthornavirae	Kitrinoviricota	Tolucaviricetes	Tolivirales	Tombusviridae	Umbravirus	Carrot mottle mimic virus	47736	ssRNA(+)	plants	Plants
6134-CEM-1047|k141_852.3	D12505	100	Orthornavirae	Kitrinoviricota	Alsuviricetes	Martellivirales	Virgaviridae	Tobamovirus	Cucumber green mottle mosaic virus	12235	ssRNA(+)	plants	Plants
6134-CEM-1048|k141_3105.3	D12505	100	Orthornavirae	Kitrinoviricota	Alsuviricetes	Martellivirales	Virgaviridae	Tobamovirus	Cucumber green mottle mosaic virus	12235	ssRNA(+)	plants	Plants
6134-CEM-1049|k141_1141.5	JN661160	34.92	Orthornavirae	Pisuviricota	Pisoniviricetes	Picornavirales	Marnaviridae	Locarnavirus	Sanfarnavirus 1	2560738	ssRNA(+)	marine (S)	Others
6134-CEM-1049|k141_1266.2	AB639040	43.4	Orthornavirae	Pisuviricota	Pisoniviricetes	Picornavirales	Marnaviridae	Sogarnavirus	Chaetarnavirus 2	2560376	ssRNA(+)	algae	Algae
6134-CEM-1049|k141_1397.4	AF183905	31.72	Orthornavirae	Pisuviricota	Pisoniviricetes	Picornavirales	Dicistroviridae	Triatovirus	Black queen cell virus	92395	ssRNA(+)	invertebrates	Invertebrates
6134-CEM-1049|k141_1615.1	MN532665	29.33	Orthornavirae	Lenarviricota	Miaviricetes	Ourlivirales	Botourmiaviridae	Scleroulivirus	Scleroulivirus rhoplasmoparae	2956419	ssRNA(+)	other (specify)	Others
6134-CEM-1049|k141_179.4	X83964	50.91	Orthornavirae	Kitrinoviricota	Tolucaviricetes	Tolivirales	Tombusviridae	Avenavirus	Oat chlorotic stunt virus	146762	ssRNA	plants	Plants
6134-CEM-1049|k141_1809.2	EF198241	49.46	Orthornavirae	Pisuviricota	Pisoniviricetes	Picornavirales	Marnaviridae	Sogarnavirus	Jericarnavirus A	2560534	ssRNA(+)	marine (S)	Others
6134-CEM-1049|k141_1836.1	X83964	53.89	Orthornavirae	Kitrinoviricota	Tolucaviricetes	Tolivirales	Tombusviridae	Avenavirus	Oat chlorotic stunt virus	146762	ssRNA	plants	Plants
6134-CEM-1049|k141_353.5	AF277675	40.62	Orthornavirae	Pisuviricota	Pisoniviricetes	Picornavirales	Dicistroviridae	Aparavirus	Taura syndrome virus	142102	ssRNA(+)	invertebrates	Invertebrates
6134-CEM-1049|k141_391.3	AF452884	35.19	Orthornavirae	Kitrinoviricota	Tolucaviricetes	Tolivirales	Tombusviridae	Betanecrovirus	Beet black scorch virus	196375	ssRNA(+)	plants	Plants
6134-CEM-1049|k141_652.1	KF412901	49.72	Orthornavirae	Pisuviricota	Pisoniviricetes	Picornavirales	Marnaviridae	Locarnavirus	Sanfarnavirus 2	2560739	ssRNA(+)	marine (S)	Others
6134-CEM-1049|k141_757.5	AF277675	34.25	Orthornavirae	Pisuviricota	Pisoniviricetes	Picornavirales	Dicistroviridae	Aparavirus	Taura syndrome virus	142102	ssRNA(+)	invertebrates	Invertebrates
6134-CEM-1049|k141_769.1	EF198242	46.77	Orthornavirae	Pisuviricota	Pisoniviricetes	Picornavirales	Marnaviridae	Locarnavirus	Jericarnavirus B	2560535	ssRNA(+)	marine (S)	Others
6134-CEM-1049|k141_812.4	AF452884	26.42	Orthornavirae	Kitrinoviricota	Tolucaviricetes	Tolivirales	Tombusviridae	Betanecrovirus	Beet black scorch virus	196375	ssRNA(+)	plants	Plants
6134-CEM-1054|k141_5607.4	BK013605	36.72	Orthornavirae	Lenarviricota	Leviviricetes	Norzivirales	Fiersviridae	Nuihimevirus	Nuihimevirus lutadaptatum	2845693	ssRNA(+)	bacteria	Bacteria
6134-CEM-1054|k141_8886.2	V01408	100	Orthornavirae	Kitrinoviricota	Alsuviricetes	Martellivirales	Virgaviridae	Tobamovirus	Tobacco mosaic virus	12242	ssRNA(+)	plants	Plants
6134-CEM-1054|k141_9957.6	MN605476	78.85	Orthornavirae	Lenarviricota	Miaviricetes	Ourlivirales	Botourmiaviridae	Betascleroulivirus	Betascleroulivirus botrytidis	2955479	ssRNA(+)	fungi	Fungi
6134-CEM-1057|k141_1101.1	MN532596	34.25	Orthornavirae	Lenarviricota	Miaviricetes	Ourlivirales	Botourmiaviridae	Magoulivirus	Magoulivirus epsilonplasmoparae	2956156	ssRNA(+)	other (specify)	Others
6134-CEM-1057|k141_1208.2	JN661160	34.92	Orthornavirae	Pisuviricota	Pisoniviricetes	Picornavirales	Marnaviridae	Locarnavirus	Sanfarnavirus 1	2560738	ssRNA(+)	marine (S)	Others
6134-CEM-1057|k141_1242.1	U57305	35.37	Orthornavirae	Kitrinoviricota	Tolucaviricetes	Tolivirales	Tombusviridae	Umbravirus	Carrot mottle mimic virus	47736	ssRNA(+)	plants	Plants
6134-CEM-1057|k141_1255.4	AJ557804	52.79	Orthornavirae	Kitrinoviricota	Tolucaviricetes	Tolivirales	Tombusviridae	Aureusvirus	Johnsongrass chlorotic stripe mosaic virus	229149	ssRNA(+)	plants	Plants
6134-CEM-1057|k141_1278.1	AF452884	24.07	Orthornavirae	Kitrinoviricota	Tolucaviricetes	Tolivirales	Tombusviridae	Betanecrovirus	Beet black scorch virus	196375	ssRNA(+)	plants	Plants
6134-CEM-1057|k141_177.4	KT727024	45.59	Orthornavirae	Pisuviricota	Pisoniviricetes	Picornavirales	Marnaviridae	Sogarnavirus	Palmarnavirus 156	2560621	ssRNA(+)	marine (S)	Others
6134-CEM-1057|k141_366.2	EF198242	49.21	Orthornavirae	Pisuviricota	Pisoniviricetes	Picornavirales	Marnaviridae	Locarnavirus	Jericarnavirus B	2560535	ssRNA(+)	marine (S)	Others
6134-CEM-1057|k141_811.6	AF183905	31.72	Orthornavirae	Pisuviricota	Pisoniviricetes	Picornavirales	Dicistroviridae	Triatovirus	Black queen cell virus	92395	ssRNA(+)	invertebrates	Invertebrates
6134-CEM-1059|k141_1072.2	EF198241	59.57	Orthornavirae	Pisuviricota	Pisoniviricetes	Picornavirales	Marnaviridae	Sogarnavirus	Jericarnavirus A	2560534	ssRNA(+)	marine (S)	Others
6134-CEM-1059|k141_2073.3	AF452884	27.36	Orthornavirae	Kitrinoviricota	Tolucaviricetes	Tolivirales	Tombusviridae	Betanecrovirus	Beet black scorch virus	196375	ssRNA(+)	plants	Plants
6134-CEM-1059|k141_2376.3	JN661160	34.92	Orthornavirae	Pisuviricota	Pisoniviricetes	Picornavirales	Marnaviridae	Locarnavirus	Sanfarnavirus 1	2560738	ssRNA(+)	marine (S)	Others
6134-CEM-1059|k141_647.6	MN532665	29.6	Orthornavirae	Lenarviricota	Miaviricetes	Ourlivirales	Botourmiaviridae	Scleroulivirus	Scleroulivirus rhoplasmoparae	2956419	ssRNA(+)	other (specify)	Others
6134-CEM-1062|k141_1152.2	JN117276	32.52	Orthornavirae	Pisuviricota	Duplopiviricetes	Durnavirales	Partitiviridae	Deltapartitivirus	Pepper cryptic virus 1	369643	dsRNA	plants	Plants
6134-CEM-1072|k141_1264.4	AF277675	40.62	Orthornavirae	Pisuviricota	Pisoniviricetes	Picornavirales	Dicistroviridae	Aparavirus	Taura syndrome virus	142102	ssRNA(+)	invertebrates	Invertebrates
6134-CEM-1072|k141_1777.3	MN532665	29.6	Orthornavirae	Lenarviricota	Miaviricetes	Ourlivirales	Botourmiaviridae	Scleroulivirus	Scleroulivirus rhoplasmoparae	2956419	ssRNA(+)	other (specify)	Others
6134-CEM-1072|k141_179.2	U57305	35.37	Orthornavirae	Kitrinoviricota	Tolucaviricetes	Tolivirales	Tombusviridae	Umbravirus	Carrot mottle mimic virus	47736	ssRNA(+)	plants	Plants
6134-CEM-1072|k141_2838.3	AJ557804	52.79	Orthornavirae	Kitrinoviricota	Tolucaviricetes	Tolivirales	Tombusviridae	Aureusvirus	Johnsongrass chlorotic stripe mosaic virus	229149	ssRNA(+)	plants	Plants
6134-CEM-1072|k141_2934.4	AF183905	31.72	Orthornavirae	Pisuviricota	Pisoniviricetes	Picornavirales	Dicistroviridae	Triatovirus	Black queen cell virus	92395	ssRNA(+)	invertebrates	Invertebrates
6134-CEM-1072|k141_3034.6	X83964	52.69	Orthornavirae	Kitrinoviricota	Tolucaviricetes	Tolivirales	Tombusviridae	Avenavirus	Oat chlorotic stunt virus	146762	ssRNA	plants	Plants
6134-CEM-1072|k141_3363.5	EF198241	50.78	Orthornavirae	Pisuviricota	Pisoniviricetes	Picornavirales	Marnaviridae	Sogarnavirus	Jericarnavirus A	2560534	ssRNA(+)	marine (S)	Others
6134-CEM-1072|k141_3455.4	JN661160	34.92	Orthornavirae	Pisuviricota	Pisoniviricetes	Picornavirales	Marnaviridae	Locarnavirus	Sanfarnavirus 1	2560738	ssRNA(+)	marine (S)	Others
6134-CEM-1072|k141_3921.1	AF452884	24.07	Orthornavirae	Kitrinoviricota	Tolucaviricetes	Tolivirales	Tombusviridae	Betanecrovirus	Beet black scorch virus	196375	ssRNA(+)	plants	Plants
6134-CEM-1072|k141_4172.5	EF198242	46.77	Orthornavirae	Pisuviricota	Pisoniviricetes	Picornavirales	Marnaviridae	Locarnavirus	Jericarnavirus B	2560535	ssRNA(+)	marine (S)	Others
6134-CEM-1073|k141_222.5	X78602	26.17	Orthornavirae	Kitrinoviricota	Alsuviricetes	Martellivirales	Virgaviridae	Pecluvirus	Peanut clump virus	28355	ssRNA(+)	plants	Plants
6134-CEM-1073|k141_584.5	EF198241	50	Orthornavirae	Pisuviricota	Pisoniviricetes	Picornavirales	Marnaviridae	Sogarnavirus	Jericarnavirus A	2560534	ssRNA(+)	marine (S)	Others
6134-CEM-1074|k141_1162.6	EF198241	48.92	Orthornavirae	Pisuviricota	Pisoniviricetes	Picornavirales	Marnaviridae	Sogarnavirus	Jericarnavirus A	2560534	ssRNA(+)	marine (S)	Others
6134-CEM-1074|k141_1383.3	AF452884	24.07	Orthornavirae	Kitrinoviricota	Tolucaviricetes	Tolivirales	Tombusviridae	Betanecrovirus	Beet black scorch virus	196375	ssRNA(+)	plants	Plants
6134-CEM-1074|k141_694.3	JN661160	34.92	Orthornavirae	Pisuviricota	Pisoniviricetes	Picornavirales	Marnaviridae	Locarnavirus	Sanfarnavirus 1	2560738	ssRNA(+)	marine (S)	Others
6134-CEM-1082|k141_1208.2	AF452884	26.42	Orthornavirae	Kitrinoviricota	Tolucaviricetes	Tolivirales	Tombusviridae	Betanecrovirus	Beet black scorch virus	196375	ssRNA(+)	plants	Plants
6134-CEM-1082|k141_1270.2	X83964	50.91	Orthornavirae	Kitrinoviricota	Tolucaviricetes	Tolivirales	Tombusviridae	Avenavirus	Oat chlorotic stunt virus	146762	ssRNA	plants	Plants
6134-CEM-1082|k141_1408.5	JN661160	34.92	Orthornavirae	Pisuviricota	Pisoniviricetes	Picornavirales	Marnaviridae	Locarnavirus	Sanfarnavirus 1	2560738	ssRNA(+)	marine (S)	Others
6134-CEM-1082|k141_1711.5	EF198241	50	Orthornavirae	Pisuviricota	Pisoniviricetes	Picornavirales	Marnaviridae	Sogarnavirus	Jericarnavirus A	2560534	ssRNA(+)	marine (S)	Others
6134-CEM-1082|k141_363.4	KF412901	50.82	Orthornavirae	Pisuviricota	Pisoniviricetes	Picornavirales	Marnaviridae	Locarnavirus	Sanfarnavirus 2	2560739	ssRNA(+)	marine (S)	Others
6134-CEM-1082|k141_540.3	KP900921	33.93	Orthornavirae	Lenarviricota	Miaviricetes	Ourlivirales	Botourmiaviridae	Magoulivirus	Rhizoctonia magoulivirus 1	2560704	ssRNA(+)	fungi	Fungi
6134-CEM-1087|k141_373.1	AF452884	24.07	Orthornavirae	Kitrinoviricota	Tolucaviricetes	Tolivirales	Tombusviridae	Betanecrovirus	Beet black scorch virus	196375	ssRNA(+)	plants	Plants
6134-CEM-1087|k141_429.4	JN661160	34.92	Orthornavirae	Pisuviricota	Pisoniviricetes	Picornavirales	Marnaviridae	Locarnavirus	Sanfarnavirus 1	2560738	ssRNA(+)	marine (S)	Others
6134-CEM-1087|k141_744.1	EF198241	49.46	Orthornavirae	Pisuviricota	Pisoniviricetes	Picornavirales	Marnaviridae	Sogarnavirus	Jericarnavirus A	2560534	ssRNA(+)	marine (S)	Others
6134-CEM-1087|k141_818.1	EF517277	35.97	Orthornavirae	Pisuviricota	Pisoniviricetes	Picornavirales	Iflaviridae	Iflavirus	Brevicoryne brassicae virus	1993638	ssRNA(+)	invertebrates	Invertebrates
6134-CEM-1087|k141_881.6	U57305	35.37	Orthornavirae	Kitrinoviricota	Tolucaviricetes	Tolivirales	Tombusviridae	Umbravirus	Carrot mottle mimic virus	47736	ssRNA(+)	plants	Plants
6134-CEM-1087|k141_893.4	MN532665	29.33	Orthornavirae	Lenarviricota	Miaviricetes	Ourlivirales	Botourmiaviridae	Scleroulivirus	Scleroulivirus rhoplasmoparae	2956419	ssRNA(+)	other (specify)	Others
6134-CEM-1087|k141_954.2	EF198242	33.96	Orthornavirae	Pisuviricota	Pisoniviricetes	Picornavirales	Marnaviridae	Locarnavirus	Jericarnavirus B	2560535	ssRNA(+)	marine (S)	Others
6134-CEM-1088|k141_1030.5	AF183905	31.72	Orthornavirae	Pisuviricota	Pisoniviricetes	Picornavirales	Dicistroviridae	Triatovirus	Black queen cell virus	92395	ssRNA(+)	invertebrates	Invertebrates
6134-CEM-1088|k141_1045.5	AJ557804	52.79	Orthornavirae	Kitrinoviricota	Tolucaviricetes	Tolivirales	Tombusviridae	Aureusvirus	Johnsongrass chlorotic stripe mosaic virus	229149	ssRNA(+)	plants	Plants
6134-CEM-1088|k141_1218.3	U57305	35.98	Orthornavirae	Kitrinoviricota	Tolucaviricetes	Tolivirales	Tombusviridae	Umbravirus	Carrot mottle mimic virus	47736	ssRNA(+)	plants	Plants
6134-CEM-1088|k141_169.1	AF452884	24.07	Orthornavirae	Kitrinoviricota	Tolucaviricetes	Tolivirales	Tombusviridae	Betanecrovirus	Beet black scorch virus	196375	ssRNA(+)	plants	Plants
6134-CEM-1088|k141_1697.1	JN661160	34.92	Orthornavirae	Pisuviricota	Pisoniviricetes	Picornavirales	Marnaviridae	Locarnavirus	Sanfarnavirus 1	2560738	ssRNA(+)	marine (S)	Others
6134-CEM-1088|k141_247.6	EF198241	50	Orthornavirae	Pisuviricota	Pisoniviricetes	Picornavirales	Marnaviridae	Sogarnavirus	Jericarnavirus A	2560534	ssRNA(+)	marine (S)	Others
6134-CEM-1088|k141_254.4	KC610514	61.16	Orthornavirae	Duplornaviricota	Chrymotiviricetes	Ghabrivirales	Totiviridae	Totivirus	Scheffersomyces segobiensis virus L	1300323	dsRNA	fungi	Fungi
6134-CEM-1088|k141_280.6	MN532596	38.05	Orthornavirae	Lenarviricota	Miaviricetes	Ourlivirales	Botourmiaviridae	Magoulivirus	Magoulivirus epsilonplasmoparae	2956156	ssRNA(+)	other (specify)	Others
6134-CEM-1088|k141_625.2	AB971661	42.96	Orthornavirae	Pisuviricota	Pisoniviricetes	Picornavirales	Marnaviridae	Sogarnavirus	Chaetenuissarnavirus II	NA	ssRNA(+)	algae	Algae
6134-CEM-1092|k141_21345.5	X01678	100	Orthornavirae	Kitrinoviricota	Alsuviricetes	Martellivirales	Bromoviridae	Bromovirus	Brome mosaic virus	12302	ssRNA(+)	plants	Plants
6134-CEM-1092|k141_22382.2	X01678	99.11	Orthornavirae	Kitrinoviricota	Alsuviricetes	Martellivirales	Bromoviridae	Bromovirus	Brome mosaic virus	12302	ssRNA(+)	plants	Plants
6134-CEM-1094|k141_300.3	AF452884	24.07	Orthornavirae	Kitrinoviricota	Tolucaviricetes	Tolivirales	Tombusviridae	Betanecrovirus	Beet black scorch virus	196375	ssRNA(+)	plants	Plants
6134-CEM-1094|k141_871.4	JN661160	34.92	Orthornavirae	Pisuviricota	Pisoniviricetes	Picornavirales	Marnaviridae	Locarnavirus	Sanfarnavirus 1	2560738	ssRNA(+)	marine (S)	Others
6134-CEM-1095|k141_198.2	X78602	26.17	Orthornavirae	Kitrinoviricota	Alsuviricetes	Martellivirales	Virgaviridae	Pecluvirus	Peanut clump virus	28355	ssRNA(+)	plants	Plants
6134-CEM-1095|k141_960.6	AB017037	34.91	Orthornavirae	Pisuviricota	Pisoniviricetes	Picornavirales	Dicistroviridae	Triatovirus	Himetobi P virus	81583	ssRNA(+)	invertebrates	Invertebrates
6134-CEM-1098|k141_1462.5	BK010428	100	Orthornavirae	Lenarviricota	Howeltoviricetes	Cryppavirales	Mitoviridae	Duamitovirus	Duamitovirus casa1	2955773	ssRNA(+)	plants	Plants
6134-CEM-1098|k141_1485.6	MN532632	53.9	Orthornavirae	Lenarviricota	Miaviricetes	Ourlivirales	Botourmiaviridae	Epsilonscleroulivirus	Epsilonscleroulivirus plasmoparae	2955871	ssRNA(+)	other (specify)	Others
6134-CEM-1098|k141_5585.4	AY843307	24.64	Orthornavirae	Pisuviricota	Pisoniviricetes	Picornavirales	Picornaviridae	Enterovirus	Enterovirus B	138949	ssRNA(+)	vertebrates	Vertebrates	human
6134-CEM-1100|k141_1237.6	BK010429	53.45	Orthornavirae	Lenarviricota	Howeltoviricetes	Cryppavirales	Mitoviridae	Duamitovirus	Duamitovirus dapi1	2955778	ssRNA(+)	plants	Plants
6134-CEM-1100|k141_5029.6	X01678	99.11	Orthornavirae	Kitrinoviricota	Alsuviricetes	Martellivirales	Bromoviridae	Bromovirus	Brome mosaic virus	12302	ssRNA(+)	plants	Plants
6134-CEM-1103|k141_107.3	AF452884	24.07	Orthornavirae	Kitrinoviricota	Tolucaviricetes	Tolivirales	Tombusviridae	Betanecrovirus	Beet black scorch virus	196375	ssRNA(+)	plants	Plants
6134-CEM-1103|k141_402.1	KT727024	46.38	Orthornavirae	Pisuviricota	Pisoniviricetes	Picornavirales	Marnaviridae	Sogarnavirus	Palmarnavirus 156	2560621	ssRNA(+)	marine (S)	Others
6134-CEM-1105|k141_3674.6	KC610514	61.67	Orthornavirae	Duplornaviricota	Chrymotiviricetes	Ghabrivirales	Totiviridae	Totivirus	Scheffersomyces segobiensis virus L	1300323	dsRNA	fungi	Fungi
6134-CEM-1106|k141_34542.6	D12505	100	Orthornavirae	Kitrinoviricota	Alsuviricetes	Martellivirales	Virgaviridae	Tobamovirus	Cucumber green mottle mosaic virus	12235	ssRNA(+)	plants	Plants
6134-CEM-1106|k141_708.1	KF482072	55.9	Orthornavirae	Kitrinoviricota	Tolucaviricetes	Tolivirales	Tombusviridae	Aureusvirus	Yam spherical virus	1421055	ssRNA(+)	plants	Plants
6134-CEM-1108|k141_11124.3	X01678	98.7	Orthornavirae	Kitrinoviricota	Alsuviricetes	Martellivirales	Bromoviridae	Bromovirus	Brome mosaic virus	12302	ssRNA(+)	plants	Plants
6134-CEM-1108|k141_21360.2	MN532645	58.12	Orthornavirae	Lenarviricota	Miaviricetes	Ourlivirales	Botourmiaviridae	Botoulivirus	Botoulivirus deltaplasmoparae	2955521	ssRNA(+)	other (specify)	Others
6134-CEM-1108|k141_21765.5	MK584842	62.61	Orthornavirae	Lenarviricota	Miaviricetes	Ourlivirales	Botourmiaviridae	Botoulivirus	Epicoccum botoulivirus	2844155	ssRNA(+)	fungi	Fungi
6134-CEM-1108|k141_24892.4	BK010429	50.63	Orthornavirae	Lenarviricota	Howeltoviricetes	Cryppavirales	Mitoviridae	Duamitovirus	Duamitovirus dapi1	2955778	ssRNA(+)	plants	Plants
6134-CEM-1108|k141_25569.5	MN532659	69.5	Orthornavirae	Lenarviricota	Miaviricetes	Ourlivirales	Botourmiaviridae	Scleroulivirus	Scleroulivirus lambdaplasmoparae	2956413	ssRNA(+)	other (specify)	Others
6134-CEM-1111|k141_1217.4	AF452884	24.07	Orthornavirae	Kitrinoviricota	Tolucaviricetes	Tolivirales	Tombusviridae	Betanecrovirus	Beet black scorch virus	196375	ssRNA(+)	plants	Plants
6134-CEM-1111|k141_1267.4	U57305	35.37	Orthornavirae	Kitrinoviricota	Tolucaviricetes	Tolivirales	Tombusviridae	Umbravirus	Carrot mottle mimic virus	47736	ssRNA(+)	plants	Plants
6134-CEM-1111|k141_1754.6	EF198242	46.77	Orthornavirae	Pisuviricota	Pisoniviricetes	Picornavirales	Marnaviridae	Locarnavirus	Jericarnavirus B	2560535	ssRNA(+)	marine (S)	Others
6134-CEM-1111|k141_2098.6	BK013980	46.67	Orthornavirae	Lenarviricota	Leviviricetes	Timlovirales	Steitzviridae	Tehnicivirus	Tehnicivirus edaphenecus	2846430	ssRNA(+)	bacteria	Bacteria
6134-CEM-1111|k141_2542.1	MN532665	29.6	Orthornavirae	Lenarviricota	Miaviricetes	Ourlivirales	Botourmiaviridae	Scleroulivirus	Scleroulivirus rhoplasmoparae	2956419	ssRNA(+)	other (specify)	Others
6134-CEM-1111|k141_2774.4	JN661160	34.92	Orthornavirae	Pisuviricota	Pisoniviricetes	Picornavirales	Marnaviridae	Locarnavirus	Sanfarnavirus 1	2560738	ssRNA(+)	marine (S)	Others
6134-CEM-1111|k141_763.1	AJ557804	52.79	Orthornavirae	Kitrinoviricota	Tolucaviricetes	Tolivirales	Tombusviridae	Aureusvirus	Johnsongrass chlorotic stripe mosaic virus	229149	ssRNA(+)	plants	Plants
6134-CEM-1111|k141_805.6	KT727024	46.34	Orthornavirae	Pisuviricota	Pisoniviricetes	Picornavirales	Marnaviridae	Sogarnavirus	Palmarnavirus 156	2560621	ssRNA(+)	marine (S)	Others
6134-CEM-1113|k141_1021.3	AF218039	48.35	Orthornavirae	Pisuviricota	Pisoniviricetes	Picornavirales	Dicistroviridae	Cripavirus	Cricket paralysis virus	12136	ssRNA(+)	invertebrates	Invertebrates
6134-CEM-1113|k141_1033.3	EF198242	50	Orthornavirae	Pisuviricota	Pisoniviricetes	Picornavirales	Marnaviridae	Locarnavirus	Jericarnavirus B	2560535	ssRNA(+)	marine (S)	Others
6134-CEM-1113|k141_2104.4	EF198242	33.96	Orthornavirae	Pisuviricota	Pisoniviricetes	Picornavirales	Marnaviridae	Locarnavirus	Jericarnavirus B	2560535	ssRNA(+)	marine (S)	Others
6134-CEM-1113|k141_3873.3	AF452884	24.07	Orthornavirae	Kitrinoviricota	Tolucaviricetes	Tolivirales	Tombusviridae	Betanecrovirus	Beet black scorch virus	196375	ssRNA(+)	plants	Plants
6134-CEM-1113|k141_5640.2	AF183905	31.52	Orthornavirae	Pisuviricota	Pisoniviricetes	Picornavirales	Dicistroviridae	Triatovirus	Black queen cell virus	92395	ssRNA(+)	invertebrates	Invertebrates
6134-CEM-1113|k141_5664.2	U57305	35.37	Orthornavirae	Kitrinoviricota	Tolucaviricetes	Tolivirales	Tombusviridae	Umbravirus	Carrot mottle mimic virus	47736	ssRNA(+)	plants	Plants
6134-CEM-1113|k141_7990.2	EF198241	49.46	Orthornavirae	Pisuviricota	Pisoniviricetes	Picornavirales	Marnaviridae	Sogarnavirus	Jericarnavirus A	2560534	ssRNA(+)	marine (S)	Others
6134-CEM-1113|k141_8677.6	JN661160	34.92	Orthornavirae	Pisuviricota	Pisoniviricetes	Picornavirales	Marnaviridae	Locarnavirus	Sanfarnavirus 1	2560738	ssRNA(+)	marine (S)	Others
6134-CEM-1118|k141_1055.1	JN661160	34.92	Orthornavirae	Pisuviricota	Pisoniviricetes	Picornavirales	Marnaviridae	Locarnavirus	Sanfarnavirus 1	2560738	ssRNA(+)	marine (S)	Others
6134-CEM-1118|k141_1490.5	AF171942	43.8	Orthornavirae	Kitrinoviricota	Magsaviricetes	Nodamuvirales	Nodaviridae	Alphanodavirus	Pariacoto virus	103782	ssRNA(+)	invertebrates	Invertebrates
6134-CEM-1118|k141_2716.3	U57305	35.37	Orthornavirae	Kitrinoviricota	Tolucaviricetes	Tolivirales	Tombusviridae	Umbravirus	Carrot mottle mimic virus	47736	ssRNA(+)	plants	Plants
6134-CEM-1118|k141_2720.3	AF183905	31.72	Orthornavirae	Pisuviricota	Pisoniviricetes	Picornavirales	Dicistroviridae	Triatovirus	Black queen cell virus	92395	ssRNA(+)	invertebrates	Invertebrates
6134-CEM-1118|k141_2790.3	EU770620	42.86	Orthornavirae	Lenarviricota	Miaviricetes	Ourlivirales	Botourmiaviridae	Ourmiavirus	Epirus cherry virus	544686	ssRNA(+)	plants	Plants
6134-CEM-1118|k141_2862.6	EF198241	50	Orthornavirae	Pisuviricota	Pisoniviricetes	Picornavirales	Marnaviridae	Sogarnavirus	Jericarnavirus A	2560534	ssRNA(+)	marine (S)	Others
6134-CEM-1118|k141_2987.2	AF452884	24.07	Orthornavirae	Kitrinoviricota	Tolucaviricetes	Tolivirales	Tombusviridae	Betanecrovirus	Beet black scorch virus	196375	ssRNA(+)	plants	Plants
6134-CEM-1118|k141_3020.4	AB375474	46.24	Orthornavirae	Pisuviricota	Pisoniviricetes	Picornavirales	Marnaviridae	Bacillarnavirus	Chaetoceros tenuissimus RNA virus 01	497136	ssRNA(+)	algae	Algae
6134-CEM-1118|k141_318.6	AJ557804	52.79	Orthornavirae	Kitrinoviricota	Tolucaviricetes	Tolivirales	Tombusviridae	Aureusvirus	Johnsongrass chlorotic stripe mosaic virus	229149	ssRNA(+)	plants	Plants
6134-CEM-1118|k141_372.3	KF412901	49.72	Orthornavirae	Pisuviricota	Pisoniviricetes	Picornavirales	Marnaviridae	Locarnavirus	Sanfarnavirus 2	2560739	ssRNA(+)	marine (S)	Others
6134-CEM-1118|k141_38.1	X83964	52.69	Orthornavirae	Kitrinoviricota	Tolucaviricetes	Tolivirales	Tombusviridae	Avenavirus	Oat chlorotic stunt virus	146762	ssRNA	plants	Plants
6134-CEM-1119|k141_218.5	EF198241	50	Orthornavirae	Pisuviricota	Pisoniviricetes	Picornavirales	Marnaviridae	Sogarnavirus	Jericarnavirus A	2560534	ssRNA(+)	marine (S)	Others
6134-CEM-1127|k141_348.6	EF198241	50	Orthornavirae	Pisuviricota	Pisoniviricetes	Picornavirales	Marnaviridae	Sogarnavirus	Jericarnavirus A	2560534	ssRNA(+)	marine (S)	Others
6134-CEM-1127|k141_351.4	U57305	35.37	Orthornavirae	Kitrinoviricota	Tolucaviricetes	Tolivirales	Tombusviridae	Umbravirus	Carrot mottle mimic virus	47736	ssRNA(+)	plants	Plants
6134-CEM-1128|k141_375.6	EU770623	41.07	Orthornavirae	Lenarviricota	Miaviricetes	Ourlivirales	Botourmiaviridae	Ourmiavirus	Ourmia melon virus	186786	ssRNA(+)	plants	Plants
6134-CEM-1128|k141_992.1	EF198241	50	Orthornavirae	Pisuviricota	Pisoniviricetes	Picornavirales	Marnaviridae	Sogarnavirus	Jericarnavirus A	2560534	ssRNA(+)	marine (S)	Others
6134-CEM-1129|k141_19762.1	JN661160	34.92	Orthornavirae	Pisuviricota	Pisoniviricetes	Picornavirales	Marnaviridae	Locarnavirus	Sanfarnavirus 1	2560738	ssRNA(+)	marine (S)	Others
6134-CEM-1129|k141_2358.6	AJ557804	52.79	Orthornavirae	Kitrinoviricota	Tolucaviricetes	Tolivirales	Tombusviridae	Aureusvirus	Johnsongrass chlorotic stripe mosaic virus	229149	ssRNA(+)	plants	Plants
6134-CEM-1129|k141_4891.5	EF198241	49.46	Orthornavirae	Pisuviricota	Pisoniviricetes	Picornavirales	Marnaviridae	Sogarnavirus	Jericarnavirus A	2560534	ssRNA(+)	marine (S)	Others
6134-CEM-1129|k141_501.1	AF452884	24.07	Orthornavirae	Kitrinoviricota	Tolucaviricetes	Tolivirales	Tombusviridae	Betanecrovirus	Beet black scorch virus	196375	ssRNA(+)	plants	Plants
6134-CEM-1129|k141_6110.3	MN532665	29.6	Orthornavirae	Lenarviricota	Miaviricetes	Ourlivirales	Botourmiaviridae	Scleroulivirus	Scleroulivirus rhoplasmoparae	2956419	ssRNA(+)	other (specify)	Others
6134-CEM-1129|k141_9110.2	AF183905	31.72	Orthornavirae	Pisuviricota	Pisoniviricetes	Picornavirales	Dicistroviridae	Triatovirus	Black queen cell virus	92395	ssRNA(+)	invertebrates	Invertebrates
6134-CEM-1134|k141_108.1	EF198241	50	Orthornavirae	Pisuviricota	Pisoniviricetes	Picornavirales	Marnaviridae	Sogarnavirus	Jericarnavirus A	2560534	ssRNA(+)	marine (S)	Others
6134-CEM-1134|k141_580.5	U57305	35.37	Orthornavirae	Kitrinoviricota	Tolucaviricetes	Tolivirales	Tombusviridae	Umbravirus	Carrot mottle mimic virus	47736	ssRNA(+)	plants	Plants
6134-CEM-1134|k141_68.5	AF452884	24.07	Orthornavirae	Kitrinoviricota	Tolucaviricetes	Tolivirales	Tombusviridae	Betanecrovirus	Beet black scorch virus	196375	ssRNA(+)	plants	Plants
6134-CEM-1135|k141_212.2	JN661160	34.92	Orthornavirae	Pisuviricota	Pisoniviricetes	Picornavirales	Marnaviridae	Locarnavirus	Sanfarnavirus 1	2560738	ssRNA(+)	marine (S)	Others
6134-CEM-1135|k141_634.2	AF452884	24.07	Orthornavirae	Kitrinoviricota	Tolucaviricetes	Tolivirales	Tombusviridae	Betanecrovirus	Beet black scorch virus	196375	ssRNA(+)	plants	Plants
6134-CEM-1140|k141_15690.2	X01678	98.82	Orthornavirae	Kitrinoviricota	Alsuviricetes	Martellivirales	Bromoviridae	Bromovirus	Brome mosaic virus	12302	ssRNA(+)	plants	Plants
6134-CEM-1140|k141_16738.2	BK010429	53.45	Orthornavirae	Lenarviricota	Howeltoviricetes	Cryppavirales	Mitoviridae	Duamitovirus	Duamitovirus dapi1	2955778	ssRNA(+)	plants	Plants
6134-CEM-1140|k141_25751.3	X06728	100	Orthornavirae	Kitrinoviricota	Alsuviricetes	Tymovirales	Alphaflexiviridae	Potexvirus	White clover mosaic virus	12188	ssRNA(+)	plants	Plants
6134-CEM-1140|k141_30362.3	KC610514	60.33	Orthornavirae	Duplornaviricota	Chrymotiviricetes	Ghabrivirales	Totiviridae	Totivirus	Scheffersomyces segobiensis virus L	1300323	dsRNA	fungi	Fungi
6134-CEM-1140|k141_34430.5	AB844264	76.36	Orthornavirae	Kitrinoviricota	Alsuviricetes	Martellivirales	Endornaviridae	Alphaendornavirus	Basella alba alphaendornavirus 1	1384490	ssRNA(+)	plants	Plants
6134-CEM-1140|k141_608.4	GU991616	36.1	Orthornavirae	Kitrinoviricota	Tolucaviricetes	Tolivirales	Carmotetraviridae	Alphacarmotetravirus	Providence virus	213633	ssRNA(+)	invertebrates	Invertebrates	non_human_mammalia
6134-CEM-1141|k141_1203.3	MN532665	29.33	Orthornavirae	Lenarviricota	Miaviricetes	Ourlivirales	Botourmiaviridae	Scleroulivirus	Scleroulivirus rhoplasmoparae	2956419	ssRNA(+)	other (specify)	Others
6134-CEM-1141|k141_1211.1	JN661160	34.92	Orthornavirae	Pisuviricota	Pisoniviricetes	Picornavirales	Marnaviridae	Locarnavirus	Sanfarnavirus 1	2560738	ssRNA(+)	marine (S)	Others
6134-CEM-1141|k141_1240.2	L16015	58.41	Orthornavirae	Kitrinoviricota	Tolucaviricetes	Tolivirales	Tombusviridae	Betacarmovirus	Cardamine chlorotic fleck virus	31711	ssRNA(+)	plants	Plants
6134-CEM-1141|k141_1295.5	EF198242	47.49	Orthornavirae	Pisuviricota	Pisoniviricetes	Picornavirales	Marnaviridae	Locarnavirus	Jericarnavirus B	2560535	ssRNA(+)	marine (S)	Others
6134-CEM-1141|k141_1348.1	EF198241	50	Orthornavirae	Pisuviricota	Pisoniviricetes	Picornavirales	Marnaviridae	Sogarnavirus	Jericarnavirus A	2560534	ssRNA(+)	marine (S)	Others
6134-CEM-1141|k141_392.5	AF183905	31.72	Orthornavirae	Pisuviricota	Pisoniviricetes	Picornavirales	Dicistroviridae	Triatovirus	Black queen cell virus	92395	ssRNA(+)	invertebrates	Invertebrates
6134-CEM-1141|k141_495.2	AF452884	24.07	Orthornavirae	Kitrinoviricota	Tolucaviricetes	Tolivirales	Tombusviridae	Betanecrovirus	Beet black scorch virus	196375	ssRNA(+)	plants	Plants
6134-CEM-1141|k141_640.5	MN532666	36.31	Orthornavirae	Lenarviricota	Miaviricetes	Ourlivirales	Botourmiaviridae	Scleroulivirus	Scleroulivirus sigmaplasmoparae	2956420	ssRNA(+)	other (specify)	Others
6134-CEM-1141|k141_834.1	U57305	35.37	Orthornavirae	Kitrinoviricota	Tolucaviricetes	Tolivirales	Tombusviridae	Umbravirus	Carrot mottle mimic virus	47736	ssRNA(+)	plants	Plants
6134-CEM-1143|k141_559.1	EF198241	50	Orthornavirae	Pisuviricota	Pisoniviricetes	Picornavirales	Marnaviridae	Sogarnavirus	Jericarnavirus A	2560534	ssRNA(+)	marine (S)	Others
6134-CEM-1143|k141_648.4	AF452884	26.09	Orthornavirae	Kitrinoviricota	Tolucaviricetes	Tolivirales	Tombusviridae	Betanecrovirus	Beet black scorch virus	196375	ssRNA(+)	plants	Plants
6134-CEM-1144|k141_1002.2	JN661160	34.92	Orthornavirae	Pisuviricota	Pisoniviricetes	Picornavirales	Marnaviridae	Locarnavirus	Sanfarnavirus 1	2560738	ssRNA(+)	marine (S)	Others
6134-CEM-1144|k141_270.5	EF198241	59.57	Orthornavirae	Pisuviricota	Pisoniviricetes	Picornavirales	Marnaviridae	Sogarnavirus	Jericarnavirus A	2560534	ssRNA(+)	marine (S)	Others
6134-CEM-1144|k141_315.5	KF412901	49.72	Orthornavirae	Pisuviricota	Pisoniviricetes	Picornavirales	Marnaviridae	Locarnavirus	Sanfarnavirus 2	2560739	ssRNA(+)	marine (S)	Others
6134-CEM-1144|k141_32.6	EF198242	49.21	Orthornavirae	Pisuviricota	Pisoniviricetes	Picornavirales	Marnaviridae	Locarnavirus	Jericarnavirus B	2560535	ssRNA(+)	marine (S)	Others
6134-CEM-1144|k141_340.4	U57305	35.37	Orthornavirae	Kitrinoviricota	Tolucaviricetes	Tolivirales	Tombusviridae	Umbravirus	Carrot mottle mimic virus	47736	ssRNA(+)	plants	Plants
6134-CEM-1144|k141_41.3	MN532665	29.6	Orthornavirae	Lenarviricota	Miaviricetes	Ourlivirales	Botourmiaviridae	Scleroulivirus	Scleroulivirus rhoplasmoparae	2956419	ssRNA(+)	other (specify)	Others
6134-CEM-1144|k141_747.3	AJ557804	52.79	Orthornavirae	Kitrinoviricota	Tolucaviricetes	Tolivirales	Tombusviridae	Aureusvirus	Johnsongrass chlorotic stripe mosaic virus	229149	ssRNA(+)	plants	Plants
6134-CEM-1144|k141_960.5	AF183905	31.72	Orthornavirae	Pisuviricota	Pisoniviricetes	Picornavirales	Dicistroviridae	Triatovirus	Black queen cell virus	92395	ssRNA(+)	invertebrates	Invertebrates
6134-CEM-1144|k141_989.2	AF452884	26.42	Orthornavirae	Kitrinoviricota	Tolucaviricetes	Tolivirales	Tombusviridae	Betanecrovirus	Beet black scorch virus	196375	ssRNA(+)	plants	Plants
6134-CEM-1145|k141_1523.2	AF183905	31.72	Orthornavirae	Pisuviricota	Pisoniviricetes	Picornavirales	Dicistroviridae	Triatovirus	Black queen cell virus	92395	ssRNA(+)	invertebrates	Invertebrates
6134-CEM-1145|k141_2572.1	AF452884	24.07	Orthornavirae	Kitrinoviricota	Tolucaviricetes	Tolivirales	Tombusviridae	Betanecrovirus	Beet black scorch virus	196375	ssRNA(+)	plants	Plants
6134-CEM-1145|k141_2836.1	EF589670	56.57	Orthornavirae	Kitrinoviricota	Tolucaviricetes	Tolivirales	Tombusviridae	Aureusvirus	Maize white line mosaic virus	445227	ssRNA(+)	plants	Plants
6134-CEM-1145|k141_322.5	EF198242	46.77	Orthornavirae	Pisuviricota	Pisoniviricetes	Picornavirales	Marnaviridae	Locarnavirus	Jericarnavirus B	2560535	ssRNA(+)	marine (S)	Others
6134-CEM-1145|k141_3562.5	JN661160	34.92	Orthornavirae	Pisuviricota	Pisoniviricetes	Picornavirales	Marnaviridae	Locarnavirus	Sanfarnavirus 1	2560738	ssRNA(+)	marine (S)	Others
6134-CEM-1145|k141_4179.6	EF198241	49.46	Orthornavirae	Pisuviricota	Pisoniviricetes	Picornavirales	Marnaviridae	Sogarnavirus	Jericarnavirus A	2560534	ssRNA(+)	marine (S)	Others
6134-CEM-1145|k141_4249.4	U57305	35.37	Orthornavirae	Kitrinoviricota	Tolucaviricetes	Tolivirales	Tombusviridae	Umbravirus	Carrot mottle mimic virus	47736	ssRNA(+)	plants	Plants
6134-CEM-1147|k141_1581.6	MG721540	30.77	Orthornavirae	Lenarviricota	Howeltoviricetes	Cryppavirales	Mitoviridae	Duamitovirus	Duamitovirus bevu1	2955768	ssRNA(+)	plants	Plants
6134-CEM-1148|k141_4027.1	X06728	99.32	Orthornavirae	Kitrinoviricota	Alsuviricetes	Tymovirales	Alphaflexiviridae	Potexvirus	White clover mosaic virus	12188	ssRNA(+)	plants	Plants
6134-CEM-1148|k141_612.2	FJ528584	44.79	Orthornavirae	Pisuviricota	Pisoniviricetes	Picornavirales	Solinviviridae	Invictavirus	Solenopsis invicta virus 3	631345	ssRNA(+)	invertebrates	Invertebrates
6134-CEM-1149|k141_283.1	EF198241	50	Orthornavirae	Pisuviricota	Pisoniviricetes	Picornavirales	Marnaviridae	Sogarnavirus	Jericarnavirus A	2560534	ssRNA(+)	marine (S)	Others
6134-CEM-1149|k141_79.4	JN661160	34.92	Orthornavirae	Pisuviricota	Pisoniviricetes	Picornavirales	Marnaviridae	Locarnavirus	Sanfarnavirus 1	2560738	ssRNA(+)	marine (S)	Others
6134-CEM-1152|k141_2091.5	AF452884	26.42	Orthornavirae	Kitrinoviricota	Tolucaviricetes	Tolivirales	Tombusviridae	Betanecrovirus	Beet black scorch virus	196375	ssRNA(+)	plants	Plants
6134-CEM-1152|k141_2449.2	EF198242	50.42	Orthornavirae	Pisuviricota	Pisoniviricetes	Picornavirales	Marnaviridae	Locarnavirus	Jericarnavirus B	2560535	ssRNA(+)	marine (S)	Others
6134-CEM-1152|k141_2658.5	AF183905	31.72	Orthornavirae	Pisuviricota	Pisoniviricetes	Picornavirales	Dicistroviridae	Triatovirus	Black queen cell virus	92395	ssRNA(+)	invertebrates	Invertebrates
6134-CEM-1152|k141_2891.3	U57305	35.37	Orthornavirae	Kitrinoviricota	Tolucaviricetes	Tolivirales	Tombusviridae	Umbravirus	Carrot mottle mimic virus	47736	ssRNA(+)	plants	Plants
6134-CEM-1152|k141_3600.6	AB193726	41.54	Orthornavirae	Pisuviricota	Pisoniviricetes	Picornavirales	Marnaviridae	Labyrnavirus	Aurantiochytrium single-stranded RNA virus 01	674971	ssRNA(+)	algae	Algae
6134-CEM-1152|k141_3917.1	EF198241	50	Orthornavirae	Pisuviricota	Pisoniviricetes	Picornavirales	Marnaviridae	Sogarnavirus	Jericarnavirus A	2560534	ssRNA(+)	marine (S)	Others
6134-CEM-1152|k141_4543.1	JN661160	34.92	Orthornavirae	Pisuviricota	Pisoniviricetes	Picornavirales	Marnaviridae	Locarnavirus	Sanfarnavirus 1	2560738	ssRNA(+)	marine (S)	Others
6134-CEM-1152|k141_4589.3	EF198242	33.96	Orthornavirae	Pisuviricota	Pisoniviricetes	Picornavirales	Marnaviridae	Locarnavirus	Jericarnavirus B	2560535	ssRNA(+)	marine (S)	Others
6134-CEM-1152|k141_569.5	MN532665	29.6	Orthornavirae	Lenarviricota	Miaviricetes	Ourlivirales	Botourmiaviridae	Scleroulivirus	Scleroulivirus rhoplasmoparae	2956419	ssRNA(+)	other (specify)	Others
6134-CEM-1152|k141_727.2	AJ557804	52.17	Orthornavirae	Kitrinoviricota	Tolucaviricetes	Tolivirales	Tombusviridae	Aureusvirus	Johnsongrass chlorotic stripe mosaic virus	229149	ssRNA(+)	plants	Plants
6134-CEM-1152|k141_878.4	M33002	55.56	Orthornavirae	Kitrinoviricota	Tolucaviricetes	Tolivirales	Tombusviridae	Alphanecrovirus	Tobacco necrosis virus A	12055	ssRNA(+)	plants	Plants
6134-CEM-1154|k141_15506.5	X76931	33.61	Orthornavirae	Pisuviricota	Pisoniviricetes	Sobelivirales	Solemoviridae	Polerovirus	Cucurbit aphid-borne yellows virus	91753	ssRNA(+)	plants	Plants
6134-CEM-1154|k141_24929.6	AB844264	76.36	Orthornavirae	Kitrinoviricota	Alsuviricetes	Martellivirales	Endornaviridae	Alphaendornavirus	Basella alba alphaendornavirus 1	1384490	ssRNA(+)	plants	Plants
6134-CEM-1154|k141_3782.4	AF039063	100	Orthornavirae	Lenarviricota	Amabiliviricetes	Wolframvirales	Narnaviridae	Narnavirus	Saccharomyces 20S RNA narnavirus	186772	ssRNA(+)	fungi	Fungi
6134-CEM-1154|k141_7005.1	AF332868	100	Orthornavirae	Kitrinoviricota	Alsuviricetes	Martellivirales	Virgaviridae	Tobamovirus	Tomato mosaic virus	12253	ssRNA(+)	plants	Plants
6134-CEM-1156|k141_16217.5	X01678	99.11	Orthornavirae	Kitrinoviricota	Alsuviricetes	Martellivirales	Bromoviridae	Bromovirus	Brome mosaic virus	12302	ssRNA(+)	plants	Plants
6134-CEM-1156|k141_4815.3	FJ528584	44.79	Orthornavirae	Pisuviricota	Pisoniviricetes	Picornavirales	Solinviviridae	Invictavirus	Solenopsis invicta virus 3	631345	ssRNA(+)	invertebrates	Invertebrates
6134-CEM-1157|k141_601.6	AF452884	24.07	Orthornavirae	Kitrinoviricota	Tolucaviricetes	Tolivirales	Tombusviridae	Betanecrovirus	Beet black scorch virus	196375	ssRNA(+)	plants	Plants
6134-CEM-1157|k141_628.3	EF198241	50	Orthornavirae	Pisuviricota	Pisoniviricetes	Picornavirales	Marnaviridae	Sogarnavirus	Jericarnavirus A	2560534	ssRNA(+)	marine (S)	Others
6134-CEM-1157|k141_920.2	JN661160	34.92	Orthornavirae	Pisuviricota	Pisoniviricetes	Picornavirales	Marnaviridae	Locarnavirus	Sanfarnavirus 1	2560738	ssRNA(+)	marine (S)	Others
6134-CEM-1158|k141_352.6	JN661160	34.92	Orthornavirae	Pisuviricota	Pisoniviricetes	Picornavirales	Marnaviridae	Locarnavirus	Sanfarnavirus 1	2560738	ssRNA(+)	marine (S)	Others
6134-CEM-1158|k141_483.1	EF198241	50	Orthornavirae	Pisuviricota	Pisoniviricetes	Picornavirales	Marnaviridae	Sogarnavirus	Jericarnavirus A	2560534	ssRNA(+)	marine (S)	Others
6134-CEM-1159|k141_168.1	D12505	100	Orthornavirae	Kitrinoviricota	Alsuviricetes	Martellivirales	Virgaviridae	Tobamovirus	Cucumber green mottle mosaic virus	12235	ssRNA(+)	plants	Plants
6134-CEM-1162|k141_1493.1	JN117276	99.39	Orthornavirae	Pisuviricota	Duplopiviricetes	Durnavirales	Partitiviridae	Deltapartitivirus	Pepper cryptic virus 1	369643	dsRNA	plants	Plants
6134-CEM-1162|k141_2025.6	KX977569	100	Orthornavirae	Kitrinoviricota	Alsuviricetes	Martellivirales	Endornaviridae	Alphaendornavirus	Bell pepper alphaendornavirus	354328	ssRNA(+)	plants	Plants
6134-CEM-1162|k141_2056.6	LC195294	98.76	Orthornavirae	Pisuviricota	Duplopiviricetes	Durnavirales	Partitiviridae	Deltapartitivirus	Pepper cryptic virus 2	1050903	dsRNA	plants	Plants
6134-CEM-1162|k141_2167.6	D00355	98.17	Orthornavirae	Kitrinoviricota	Alsuviricetes	Martellivirales	Bromoviridae	Cucumovirus	Cucumber mosaic virus	12305	ssRNA(+)	plants	Plants
6134-CEM-1162|k141_2586.3	M81413	100	Orthornavirae	Kitrinoviricota	Alsuviricetes	Martellivirales	Virgaviridae	Tobamovirus	Pepper mild mottle virus	12239	ssRNA(+)	plants	Plants	human
6134-CEM-1162|k141_594.3	AF014388	38.26	Orthornavirae	Pisuviricota	Pisoniviricetes	Picornavirales	Dicistroviridae	Cripavirus	Drosophila C virus	64279	ssRNA(+)	invertebrates	Invertebrates
6134-CEM-1162|k141_7.6	D00355	96.33	Orthornavirae	Kitrinoviricota	Alsuviricetes	Martellivirales	Bromoviridae	Cucumovirus	Cucumber mosaic virus	12305	ssRNA(+)	plants	Plants
6134-CEM-1164|k141_12684.5	BK013438	44.67	Orthornavirae	Lenarviricota	Leviviricetes	Timlovirales	Steitzviridae	Stehnavirus	Stehnavirus chorovicinum	2846386	ssRNA(+)	bacteria	Bacteria
6134-CEM-1164|k141_24800.4	BK013395	61.11	Orthornavirae	Lenarviricota	Leviviricetes	Norzivirales	Fiersviridae	Noehsivirus	Noehsivirus tellurivivens	2845692	ssRNA(+)	bacteria	Bacteria
6134-CEM-1164|k141_37133.4	BK010429	79.31	Orthornavirae	Lenarviricota	Howeltoviricetes	Cryppavirales	Mitoviridae	Duamitovirus	Duamitovirus dapi1	2955778	ssRNA(+)	plants	Plants
6134-CEM-1164|k141_6108.4	BK010429	53.45	Orthornavirae	Lenarviricota	Howeltoviricetes	Cryppavirales	Mitoviridae	Duamitovirus	Duamitovirus dapi1	2955778	ssRNA(+)	plants	Plants
6134-CEM-1164|k141_6905.3	BK010428	100	Orthornavirae	Lenarviricota	Howeltoviricetes	Cryppavirales	Mitoviridae	Duamitovirus	Duamitovirus casa1	2955773	ssRNA(+)	plants	Plants
6134-CEM-1165|k141_2988.3	V01408	100	Orthornavirae	Kitrinoviricota	Alsuviricetes	Martellivirales	Virgaviridae	Tobamovirus	Tobacco mosaic virus	12242	ssRNA(+)	plants	Plants
6134-CEM-1166|k141_12348.1	MK372903	64.29	Orthornavirae	Lenarviricota	Howeltoviricetes	Cryppavirales	Mitoviridae	Duamitovirus	Duamitovirus rhso34	2955833	ssRNA(+)	fungi	Fungi
6134-CEM-1166|k141_31383.2	X01678	100	Orthornavirae	Kitrinoviricota	Alsuviricetes	Martellivirales	Bromoviridae	Bromovirus	Brome mosaic virus	12302	ssRNA(+)	plants	Plants
6134-CEM-1168|k141_26222.3	X01678	100	Orthornavirae	Kitrinoviricota	Alsuviricetes	Martellivirales	Bromoviridae	Bromovirus	Brome mosaic virus	12302	ssRNA(+)	plants	Plants
6134-CEM-1168|k141_26602.6	AF332868	100	Orthornavirae	Kitrinoviricota	Alsuviricetes	Martellivirales	Virgaviridae	Tobamovirus	Tomato mosaic virus	12253	ssRNA(+)	plants	Plants
6134-CEM-1170|k141_18964.3	M81413	99.35	Orthornavirae	Kitrinoviricota	Alsuviricetes	Martellivirales	Virgaviridae	Tobamovirus	Pepper mild mottle virus	12239	ssRNA(+)	plants	Plants	human
6134-CEM-1170|k141_20064.5	BK010429	53.45	Orthornavirae	Lenarviricota	Howeltoviricetes	Cryppavirales	Mitoviridae	Duamitovirus	Duamitovirus dapi1	2955778	ssRNA(+)	plants	Plants
6134-CEM-1170|k141_802.2	X01678	100	Orthornavirae	Kitrinoviricota	Alsuviricetes	Martellivirales	Bromoviridae	Bromovirus	Brome mosaic virus	12302	ssRNA(+)	plants	Plants
6134-CEM-1171|k141_1073.3	BK010426	60.68	Orthornavirae	Lenarviricota	Howeltoviricetes	Cryppavirales	Mitoviridae	Duamitovirus	Duamitovirus peex1	2955799	ssRNA(+)	plants	Plants
6134-CEM-1171|k141_11693.4	MF375475	79.69	Orthornavirae	Lenarviricota	Howeltoviricetes	Cryppavirales	Mitoviridae	Duamitovirus	Duamitovirus chqu1	2955775	ssRNA(+)	plants	Plants
6134-CEM-1171|k141_38797.1	X01678	99.11	Orthornavirae	Kitrinoviricota	Alsuviricetes	Martellivirales	Bromoviridae	Bromovirus	Brome mosaic virus	12302	ssRNA(+)	plants	Plants
6134-CEM-1171|k141_44626.2	BK010429	53.45	Orthornavirae	Lenarviricota	Howeltoviricetes	Cryppavirales	Mitoviridae	Duamitovirus	Duamitovirus dapi1	2955778	ssRNA(+)	plants	Plants
6134-CEM-1171|k141_61448.6	D12505	100	Orthornavirae	Kitrinoviricota	Alsuviricetes	Martellivirales	Virgaviridae	Tobamovirus	Cucumber green mottle mosaic virus	12235	ssRNA(+)	plants	Plants
6134-CEM-1173|k141_23873.1	X01678	99.11	Orthornavirae	Kitrinoviricota	Alsuviricetes	Martellivirales	Bromoviridae	Bromovirus	Brome mosaic virus	12302	ssRNA(+)	plants	Plants
6134-CEM-1173|k141_7469.1	MN532631	28.17	Orthornavirae	Lenarviricota	Miaviricetes	Ourlivirales	Botourmiaviridae	Scleroulivirus	Scleroulivirus alphaplasmoparae	2956405	ssRNA(+)	other (specify)	Others
6134-CEM-1174|k141_3320.1	JQ700308	31.51	Orthornavirae	Pisuviricota	Pisoniviricetes	Sobelivirales	Solemoviridae	Polerovirus	Suakwa aphid-borne yellows virus	646010	ssRNA(+)	plants	Plants
6134-CEM-1174|k141_36785.2	X01678	99.11	Orthornavirae	Kitrinoviricota	Alsuviricetes	Martellivirales	Bromoviridae	Bromovirus	Brome mosaic virus	12302	ssRNA(+)	plants	Plants
6134-CEM-1174|k141_40856.2	X06728	100	Orthornavirae	Kitrinoviricota	Alsuviricetes	Tymovirales	Alphaflexiviridae	Potexvirus	White clover mosaic virus	12188	ssRNA(+)	plants	Plants
6134-CEM-1174|k141_4763.1	AF014388	33.68	Orthornavirae	Pisuviricota	Pisoniviricetes	Picornavirales	Dicistroviridae	Cripavirus	Drosophila C virus	64279	ssRNA(+)	invertebrates	Invertebrates
6134-CEM-1174|k141_51766.5	M81413	100	Orthornavirae	Kitrinoviricota	Alsuviricetes	Martellivirales	Virgaviridae	Tobamovirus	Pepper mild mottle virus	12239	ssRNA(+)	plants	Plants	human
6134-CEM-1176|k141_1071.6	JN661160	34.92	Orthornavirae	Pisuviricota	Pisoniviricetes	Picornavirales	Marnaviridae	Locarnavirus	Sanfarnavirus 1	2560738	ssRNA(+)	marine (S)	Others
6134-CEM-1176|k141_1314.2	AB639040	40.76	Orthornavirae	Pisuviricota	Pisoniviricetes	Picornavirales	Marnaviridae	Sogarnavirus	Chaetarnavirus 2	2560376	ssRNA(+)	algae	Algae
6134-CEM-1176|k141_1409.5	MN532666	36.31	Orthornavirae	Lenarviricota	Miaviricetes	Ourlivirales	Botourmiaviridae	Scleroulivirus	Scleroulivirus sigmaplasmoparae	2956420	ssRNA(+)	other (specify)	Others
6134-CEM-1176|k141_1472.2	KF412901	49.72	Orthornavirae	Pisuviricota	Pisoniviricetes	Picornavirales	Marnaviridae	Locarnavirus	Sanfarnavirus 2	2560739	ssRNA(+)	marine (S)	Others
6134-CEM-1176|k141_1545.6	AY038069	39.82	Orthornavirae	Kitrinoviricota	Tolucaviricetes	Tolivirales	Tombusviridae	Pelarspovirus	Pelargonium chlorotic ring pattern virus	167021	ssRNA(+)	plants	Plants
6134-CEM-1176|k141_274.6	EF198241	49.46	Orthornavirae	Pisuviricota	Pisoniviricetes	Picornavirales	Marnaviridae	Sogarnavirus	Jericarnavirus A	2560534	ssRNA(+)	marine (S)	Others
6134-CEM-1176|k141_2983.1	AF452884	24.07	Orthornavirae	Kitrinoviricota	Tolucaviricetes	Tolivirales	Tombusviridae	Betanecrovirus	Beet black scorch virus	196375	ssRNA(+)	plants	Plants
6134-CEM-1176|k141_527.4	AF183905	31.72	Orthornavirae	Pisuviricota	Pisoniviricetes	Picornavirales	Dicistroviridae	Triatovirus	Black queen cell virus	92395	ssRNA(+)	invertebrates	Invertebrates
BC-0247284139|k141_1089.1	MN908947	100	Orthornavirae	Pisuviricota	Pisoniviricetes	Nidovirales	Coronaviridae	Betacoronavirus	Severe acute respiratory syndrome-related coronavirus	694009	ssRNA(+)	vertebrates	Vertebrates	human
BC-0247284139|k141_16989.1	KC610514	61.16	Orthornavirae	Duplornaviricota	Chrymotiviricetes	Ghabrivirales	Totiviridae	Totivirus	Scheffersomyces segobiensis virus L	1300323	dsRNA	fungi	Fungi
BC-0247284139|k141_2597.2	KC610514	60.33	Orthornavirae	Duplornaviricota	Chrymotiviricetes	Ghabrivirales	Totiviridae	Totivirus	Scheffersomyces segobiensis virus L	1300323	dsRNA	fungi	Fungi
BC-0247284139|k141_361.5	M81413	99.35	Orthornavirae	Kitrinoviricota	Alsuviricetes	Martellivirales	Virgaviridae	Tobamovirus	Pepper mild mottle virus	12239	ssRNA(+)	plants	Plants	human
BC-0247284139|k141_5435.4	BK010428	100	Orthornavirae	Lenarviricota	Howeltoviricetes	Cryppavirales	Mitoviridae	Duamitovirus	Duamitovirus casa1	2955773	ssRNA(+)	plants	Plants
BC-0247284139|k141_7722.3	AF332868	99.35	Orthornavirae	Kitrinoviricota	Alsuviricetes	Martellivirales	Virgaviridae	Tobamovirus	Tomato mosaic virus	12253	ssRNA(+)	plants	Plants
BC-0247284151|k141_1073.4	KC610514	61.16	Orthornavirae	Duplornaviricota	Chrymotiviricetes	Ghabrivirales	Totiviridae	Totivirus	Scheffersomyces segobiensis virus L	1300323	dsRNA	fungi	Fungi
BC-0247284151|k141_13989.2	KC610514	60.33	Orthornavirae	Duplornaviricota	Chrymotiviricetes	Ghabrivirales	Totiviridae	Totivirus	Scheffersomyces segobiensis virus L	1300323	dsRNA	fungi	Fungi
BC-0247284151|k141_20518.1	M81413	99.35	Orthornavirae	Kitrinoviricota	Alsuviricetes	Martellivirales	Virgaviridae	Tobamovirus	Pepper mild mottle virus	12239	ssRNA(+)	plants	Plants	human
BC-0247284151|k141_20636.5	KC610514	52.5	Orthornavirae	Duplornaviricota	Chrymotiviricetes	Ghabrivirales	Totiviridae	Totivirus	Scheffersomyces segobiensis virus L	1300323	dsRNA	fungi	Fungi
BC-0247284151|k141_25840.4	BK010428	100	Orthornavirae	Lenarviricota	Howeltoviricetes	Cryppavirales	Mitoviridae	Duamitovirus	Duamitovirus casa1	2955773	ssRNA(+)	plants	Plants
BC-0247284151|k141_34442.5	KC610514	50.83	Orthornavirae	Duplornaviricota	Chrymotiviricetes	Ghabrivirales	Totiviridae	Totivirus	Scheffersomyces segobiensis virus L	1300323	dsRNA	fungi	Fungi
BC-0247284151|k141_3704.6	KC610514	61.16	Orthornavirae	Duplornaviricota	Chrymotiviricetes	Ghabrivirales	Totiviridae	Totivirus	Scheffersomyces segobiensis virus L	1300323	dsRNA	fungi	Fungi
BC-0247284151|k141_9932.4	KC610514	61.16	Orthornavirae	Duplornaviricota	Chrymotiviricetes	Ghabrivirales	Totiviridae	Totivirus	Scheffersomyces segobiensis virus L	1300323	dsRNA	fungi	Fungi
BC-0247290208|k141_18883.3	M81413	100	Orthornavirae	Kitrinoviricota	Alsuviricetes	Martellivirales	Virgaviridae	Tobamovirus	Pepper mild mottle virus	12239	ssRNA(+)	plants	Plants	human
BC-0247290208|k141_29147.6	M29671	98.77	Orthornavirae	Kitrinoviricota	Tolucaviricetes	Tolivirales	Tombusviridae	Gammacarmovirus	Melon necrotic spot virus	11987	ssRNA(+)	plants	Plants
BC-0247290208|k141_7547.1	BK010428	100	Orthornavirae	Lenarviricota	Howeltoviricetes	Cryppavirales	Mitoviridae	Duamitovirus	Duamitovirus casa1	2955773	ssRNA(+)	plants	Plants
BC-0247290208|k141_9810.5	AF332868	99.35	Orthornavirae	Kitrinoviricota	Alsuviricetes	Martellivirales	Virgaviridae	Tobamovirus	Tomato mosaic virus	12253	ssRNA(+)	plants	Plants
BC-0247290436|k141_10254.4	MN532613	62.39	Orthornavirae	Lenarviricota	Miaviricetes	Ourlivirales	Botourmiaviridae	Magoulivirus	Magoulivirus jiplasmoparae	2956162	ssRNA(+)	other (specify)	Others
BC-0247290436|k141_11272.1	X83964	53.01	Orthornavirae	Kitrinoviricota	Tolucaviricetes	Tolivirales	Tombusviridae	Avenavirus	Oat chlorotic stunt virus	146762	ssRNA	plants	Plants
BC-0247290436|k141_14268.3	KC610514	58.62	Orthornavirae	Duplornaviricota	Chrymotiviricetes	Ghabrivirales	Totiviridae	Totivirus	Scheffersomyces segobiensis virus L	1300323	dsRNA	fungi	Fungi
BC-0247290436|k141_25339.4	KC610514	61.16	Orthornavirae	Duplornaviricota	Chrymotiviricetes	Ghabrivirales	Totiviridae	Totivirus	Scheffersomyces segobiensis virus L	1300323	dsRNA	fungi	Fungi
BC-0247290436|k141_26785.1	KT456287	99.09	Orthornavirae	Kitrinoviricota	Alsuviricetes	Martellivirales	Endornaviridae	Alphaendornavirus	Phaseolus vulgaris alphaendornavirus 1	1188792	ssRNA(+)	plants	Plants
BC-0247290436|k141_589.6	KC610514	60.33	Orthornavirae	Duplornaviricota	Chrymotiviricetes	Ghabrivirales	Totiviridae	Totivirus	Scheffersomyces segobiensis virus L	1300323	dsRNA	fungi	Fungi
BC-0247292208|k141_13200.5	BK013605	46.15	Orthornavirae	Lenarviricota	Leviviricetes	Norzivirales	Fiersviridae	Nuihimevirus	Nuihimevirus lutadaptatum	2845693	ssRNA(+)	bacteria	Bacteria
BC-0247292208|k141_13713.5	MN532662	96.58	Orthornavirae	Lenarviricota	Miaviricetes	Ourlivirales	Botourmiaviridae	Scleroulivirus	Scleroulivirus xiplasmoparae	2956422	ssRNA(+)	other (specify)	Others
BC-0247292208|k141_14427.3	MN473199	73.64	Orthornavirae	Lenarviricota	Miaviricetes	Ourlivirales	Botourmiaviridae	Penoulivirus	Phoma penoulivirus	2845834	ssRNA(+)	fungi	Fungi
BC-0247292208|k141_15300.1	MN532627	99.2	Orthornavirae	Lenarviricota	Miaviricetes	Ourlivirales	Botourmiaviridae	Betascleroulivirus	Betascleroulivirus zetaplasmoparae	2955489	ssRNA(+)	other (specify)	Others
BC-0247292798|k141_15363.1	KC610514	56.73	Orthornavirae	Duplornaviricota	Chrymotiviricetes	Ghabrivirales	Totiviridae	Totivirus	Scheffersomyces segobiensis virus L	1300323	dsRNA	fungi	Fungi
BC-0247292798|k141_17687.6	M34077	100	Orthornavirae	Kitrinoviricota	Alsuviricetes	Martellivirales	Virgaviridae	Tobamovirus	Tobacco mild green mosaic virus	12241	ssRNA(+)	plants	Plants
BC-0247292798|k141_201.1	M29671	98.77	Orthornavirae	Kitrinoviricota	Tolucaviricetes	Tolivirales	Tombusviridae	Gammacarmovirus	Melon necrotic spot virus	11987	ssRNA(+)	plants	Plants
BC-0247292798|k141_25883.2	KC610514	60.33	Orthornavirae	Duplornaviricota	Chrymotiviricetes	Ghabrivirales	Totiviridae	Totivirus	Scheffersomyces segobiensis virus L	1300323	dsRNA	fungi	Fungi
BC-0247292798|k141_29176.2	M81413	100	Orthornavirae	Kitrinoviricota	Alsuviricetes	Martellivirales	Virgaviridae	Tobamovirus	Pepper mild mottle virus	12239	ssRNA(+)	plants	Plants	human
BC-0247292798|k141_8416.5	AF332868	99.35	Orthornavirae	Kitrinoviricota	Alsuviricetes	Martellivirales	Virgaviridae	Tobamovirus	Tomato mosaic virus	12253	ssRNA(+)	plants	Plants
BC-0247292800|k141_22434.2	X83964	53.01	Orthornavirae	Kitrinoviricota	Tolucaviricetes	Tolivirales	Tombusviridae	Avenavirus	Oat chlorotic stunt virus	146762	ssRNA	plants	Plants
BC-0247292800|k141_3548.2	KC610514	61.16	Orthornavirae	Duplornaviricota	Chrymotiviricetes	Ghabrivirales	Totiviridae	Totivirus	Scheffersomyces segobiensis virus L	1300323	dsRNA	fungi	Fungi
BC-0247293195|k141_112685.1	MG721540	61.95	Orthornavirae	Lenarviricota	Howeltoviricetes	Cryppavirales	Mitoviridae	Duamitovirus	Duamitovirus bevu1	2955768	ssRNA(+)	plants	Plants
BC-0247293332|k141_12260.3	MG967280	36.13	Orthornavirae	Kitrinoviricota	Tolucaviricetes	Tolivirales	Tombusviridae	Aureusvirus	Elderberry aureusvirus 1	2304214	ssRNA(+)	plants	Plants
BC-0247293332|k141_12832.5	MN908947	100	Orthornavirae	Pisuviricota	Pisoniviricetes	Nidovirales	Coronaviridae	Betacoronavirus	Severe acute respiratory syndrome-related coronavirus	694009	ssRNA(+)	vertebrates	Vertebrates	human
BC-0247293402|k141_1111.3	KT598247	58.41	Orthornavirae	Lenarviricota	Miaviricetes	Ourlivirales	Botourmiaviridae	Scleroulivirus	Soybean scleroulivirus 2	2560775	ssRNA(+)	fungi	Fungi
BC-0247293402|k141_2392.4	LC413501	61.26	Orthornavirae	Lenarviricota	Miaviricetes	Ourlivirales	Botourmiaviridae	Penoulivirus	Pyricularia penoulivirus	2846014	ssRNA(+)	fungi	Fungi
BC-0247293402|k141_5217.1	MN605476	66.89	Orthornavirae	Lenarviricota	Miaviricetes	Ourlivirales	Botourmiaviridae	Betascleroulivirus	Betascleroulivirus botrytidis	2955479	ssRNA(+)	fungi	Fungi
BC-0247293402|k141_5248.5	V01408	100	Orthornavirae	Kitrinoviricota	Alsuviricetes	Martellivirales	Virgaviridae	Tobamovirus	Tobacco mosaic virus	12242	ssRNA(+)	plants	Plants
BC-0247293598|k141_2729.3	KC610514	48.33	Orthornavirae	Duplornaviricota	Chrymotiviricetes	Ghabrivirales	Totiviridae	Totivirus	Scheffersomyces segobiensis virus L	1300323	dsRNA	fungi	Fungi
BC-0247293598|k141_3126.3	U01060	53.77	Orthornavirae	Duplornaviricota	Chrymotiviricetes	Ghabrivirales	Totiviridae	Totivirus	Saccharomyces cerevisiae virus LBCLa	2170233	dsRNA	fungi	Fungi
BC-0247293598|k141_4251.6	MN908947	100	Orthornavirae	Pisuviricota	Pisoniviricetes	Nidovirales	Coronaviridae	Betacoronavirus	Severe acute respiratory syndrome-related coronavirus	694009	ssRNA(+)	vertebrates	Vertebrates	human
BC-0247293598|k141_4986.3	KC610514	63.39	Orthornavirae	Duplornaviricota	Chrymotiviricetes	Ghabrivirales	Totiviridae	Totivirus	Scheffersomyces segobiensis virus L	1300323	dsRNA	fungi	Fungi
BC-0247293598|k141_8567.1	U01060	45.83	Orthornavirae	Duplornaviricota	Chrymotiviricetes	Ghabrivirales	Totiviridae	Totivirus	Saccharomyces cerevisiae virus LBCLa	2170233	dsRNA	fungi	Fungi
BC-0247293836|k141_10412.4	X83964	45.51	Orthornavirae	Kitrinoviricota	Tolucaviricetes	Tolivirales	Tombusviridae	Avenavirus	Oat chlorotic stunt virus	146762	ssRNA	plants	Plants
BC-0247293836|k141_15525.1	BK013605	55.24	Orthornavirae	Lenarviricota	Leviviricetes	Norzivirales	Fiersviridae	Nuihimevirus	Nuihimevirus lutadaptatum	2845693	ssRNA(+)	bacteria	Bacteria
BC-0247293836|k141_16870.4	FN669168	32.47	Orthornavirae	Kitrinoviricota	Alsuviricetes	Martellivirales	Bromoviridae	Ilarvirus	Lilac leaf chlorosis virus	722755	ssRNA(+)	plants	Plants
BC-0247293836|k141_16926.1	MN532659	68.1	Orthornavirae	Lenarviricota	Miaviricetes	Ourlivirales	Botourmiaviridae	Scleroulivirus	Scleroulivirus lambdaplasmoparae	2956413	ssRNA(+)	other (specify)	Others
BC-0247293836|k141_2481.6	V01408	100	Orthornavirae	Kitrinoviricota	Alsuviricetes	Martellivirales	Virgaviridae	Tobamovirus	Tobacco mosaic virus	12242	ssRNA(+)	plants	Plants
BC-0247293836|k141_27924.6	BK010429	51.3	Orthornavirae	Lenarviricota	Howeltoviricetes	Cryppavirales	Mitoviridae	Duamitovirus	Duamitovirus dapi1	2955778	ssRNA(+)	plants	Plants
BC-0247293836|k141_32321.6	AF484251	93.84	Orthornavirae	Kitrinoviricota	Alsuviricetes	Tymovirales	Alphaflexiviridae	Potexvirus	Pepino mosaic virus	112229	ssRNA(+)	plants	Plants
BC-0247293836|k141_41759.4	AJ295949	28.99	Orthornavirae	Kitrinoviricota	Alsuviricetes	Martellivirales	Virgaviridae	Tobamovirus	Zucchini green mottle mosaic virus	111418	ssRNA(+)	plants	Plants
BC-0247293836|k141_41842.5	MN532664	68.42	Orthornavirae	Lenarviricota	Miaviricetes	Ourlivirales	Botourmiaviridae	Scleroulivirus	Scleroulivirus piplasmoparae	2956418	ssRNA(+)	other (specify)	Others
BC-0247293836|k141_44023.6	AB017503	30.25	Orthornavirae	Kitrinoviricota	Alsuviricetes	Martellivirales	Virgaviridae	Tobamovirus	Wasabi mottle virus	1169032	ssRNA(+)	plants	Plants
BC-0247293836|k141_45559.4	AJ514833	37.58	Orthornavirae	Kitrinoviricota	Tolucaviricetes	Tolivirales	Tombusviridae	Alphacarmovirus	Pelargonium flower break virus	35291	ssRNA(+)	plants	Plants
BC-0247293836|k141_45680.3	BK010429	54.39	Orthornavirae	Lenarviricota	Howeltoviricetes	Cryppavirales	Mitoviridae	Duamitovirus	Duamitovirus dapi1	2955778	ssRNA(+)	plants	Plants
BC-0247293836|k141_45988.5	JN997473	54.05	Orthornavirae	Duplornaviricota	Chrymotiviricetes	Ghabrivirales	Totiviridae	Totivirus	Xanthophyllomyces dendrorhous virus L1B	1167691	dsRNA	fungi	Fungi
BC-0247293836|k141_48851.1	X15511	54.96	Orthornavirae	Kitrinoviricota	Tolucaviricetes	Tolivirales	Tombusviridae	Tombusvirus	Cymbidium ringspot virus	12144	ssRNA(+)	plants	Plants
BC-0247293836|k141_50517.6	FR687854	70.8	Orthornavirae	Pisuviricota	Duplopiviricetes	Durnavirales	Partitiviridae	Deltapartitivirus	Fig cryptic virus	882768	dsRNA	plants	Plants
BC-0247293836|k141_58078.3	AB573435	34.18	Orthornavirae	Kitrinoviricota	Alsuviricetes	Hepelivirales	Hepeviridae	Paslahepevirus	Paslahepevirus balayani	1678143	ssRNA(+)	vertebrates	Vertebrates	human
BC-0247293836|k141_63906.5	AJ295949	27.78	Orthornavirae	Kitrinoviricota	Alsuviricetes	Martellivirales	Virgaviridae	Tobamovirus	Zucchini green mottle mosaic virus	111418	ssRNA(+)	plants	Plants
BC-0247293836|k141_63913.4	MN532662	96.58	Orthornavirae	Lenarviricota	Miaviricetes	Ourlivirales	Botourmiaviridae	Scleroulivirus	Scleroulivirus xiplasmoparae	2956422	ssRNA(+)	other (specify)	Others
BC-0247293836|k141_65643.4	AB923924	26.45	Orthornavirae	Kitrinoviricota	Alsuviricetes	Martellivirales	Closteroviridae	Olivavirus	Persimmon virus B	1493829	ssRNA(+)	plants	Plants
BC-0247293836|k141_67394.5	MN532596	65.14	Orthornavirae	Lenarviricota	Miaviricetes	Ourlivirales	Botourmiaviridae	Magoulivirus	Magoulivirus epsilonplasmoparae	2956156	ssRNA(+)	other (specify)	Others
BC-0247293836|k141_78170.6	MT353902	24.75	Orthornavirae	Negarnaviricota	Ellioviricetes	Bunyavirales	Phenuiviridae	Laulavirus	Grapevine laulavirus 4	2844686	ssRNA(-)	fungi	Fungi
BC-0247293836|k141_78738.5	MN532605	57.69	Orthornavirae	Lenarviricota	Miaviricetes	Ourlivirales	Botourmiaviridae	Magoulivirus	Magoulivirus xiplasmoparae	2956177	ssRNA(+)	other (specify)	Others
BC-0247293836|k141_8013.2	MF362666	24.79	Orthornavirae	Kitrinoviricota	Alsuviricetes	Martellivirales	Endornaviridae	Alphaendornavirus	Helianthus annuus alphaendornavirus	2184469	ssRNA(+)	plants	Plants
BC-0247293836|k141_81276.6	J04357	46.85	Orthornavirae	Kitrinoviricota	Tolucaviricetes	Tolivirales	Tombusviridae	Dianthovirus	Red clover necrotic mosaic virus	12267	ssRNA(+)	plants	Plants
BC-0247293836|k141_86655.6	BK010429	53.91	Orthornavirae	Lenarviricota	Howeltoviricetes	Cryppavirales	Mitoviridae	Duamitovirus	Duamitovirus dapi1	2955778	ssRNA(+)	plants	Plants
BC-0247294223|k141_2757.4	MN908947	100	Orthornavirae	Pisuviricota	Pisoniviricetes	Nidovirales	Coronaviridae	Betacoronavirus	Severe acute respiratory syndrome-related coronavirus	694009	ssRNA(+)	vertebrates	Vertebrates	human
BC-0247294385|k141_23220.6	V01408	100	Orthornavirae	Kitrinoviricota	Alsuviricetes	Martellivirales	Virgaviridae	Tobamovirus	Tobacco mosaic virus	12242	ssRNA(+)	plants	Plants
BC-0247294385|k141_23929.1	AB569997	63.54	Orthornavirae	Pisuviricota	Duplopiviricetes	Durnavirales	Partitiviridae	Alphapartitivirus	Rosellinia necatrix partitivirus 2	859651	dsRNA	fungi	Fungi
BC-0247295148|k141_14158.3	MN532662	96.58	Orthornavirae	Lenarviricota	Miaviricetes	Ourlivirales	Botourmiaviridae	Scleroulivirus	Scleroulivirus xiplasmoparae	2956422	ssRNA(+)	other (specify)	Others
BC-0247295148|k141_18275.5	MN532677	86.57	Orthornavirae	Lenarviricota	Miaviricetes	Ourlivirales	Botourmiaviridae	Penoulivirus	Penoulivirus thetaplasmoparae	2956296	ssRNA(+)	other (specify)	Others
BC-0247295148|k141_18462.2	AY303787	79.23	Orthornavirae	Pisuviricota	Pisoniviricetes	Picornavirales	Secoviridae	Nepovirus	Raspberry ringspot virus	12809	ssRNA(+)	plants	Plants
BC-0247295148|k141_26514.1	BK010429	53.91	Orthornavirae	Lenarviricota	Howeltoviricetes	Cryppavirales	Mitoviridae	Duamitovirus	Duamitovirus dapi1	2955778	ssRNA(+)	plants	Plants
BC-0247295148|k141_31855.5	MN532659	65.81	Orthornavirae	Lenarviricota	Miaviricetes	Ourlivirales	Botourmiaviridae	Scleroulivirus	Scleroulivirus lambdaplasmoparae	2956413	ssRNA(+)	other (specify)	Others
BC-0247295148|k141_33500.3	X83964	50.45	Orthornavirae	Kitrinoviricota	Tolucaviricetes	Tolivirales	Tombusviridae	Avenavirus	Oat chlorotic stunt virus	146762	ssRNA	plants	Plants
BC-0247295148|k141_37040.1	AJ295949	27.64	Orthornavirae	Kitrinoviricota	Alsuviricetes	Martellivirales	Virgaviridae	Tobamovirus	Zucchini green mottle mosaic virus	111418	ssRNA(+)	plants	Plants
BC-0247295148|k141_38981.5	AJ295948	27.86	Orthornavirae	Kitrinoviricota	Alsuviricetes	Martellivirales	Virgaviridae	Tobamovirus	Kyuri green mottle mosaic virus	111970	ssRNA(+)	plants	Plants
BC-0247295148|k141_41108.5	MN473199	80	Orthornavirae	Lenarviricota	Miaviricetes	Ourlivirales	Botourmiaviridae	Penoulivirus	Phoma penoulivirus	2845834	ssRNA(+)	fungi	Fungi
BC-0247295148|k141_5250.5	AY100482	52.35	Orthornavirae	Kitrinoviricota	Tolucaviricetes	Tolivirales	Tombusviridae	Tombusvirus	Eggplant mottled crinkle virus	270256	ssRNA(+)	plants	Plants
BC-0247295148|k141_655.3	BK010429	54.31	Orthornavirae	Lenarviricota	Howeltoviricetes	Cryppavirales	Mitoviridae	Duamitovirus	Duamitovirus dapi1	2955778	ssRNA(+)	plants	Plants
BC-0302366298|k141_10173.3	MG721540	57.52	Orthornavirae	Lenarviricota	Howeltoviricetes	Cryppavirales	Mitoviridae	Duamitovirus	Duamitovirus bevu1	2955768	ssRNA(+)	plants	Plants
BC-0302366298|k141_10204.4	MG721540	68.81	Orthornavirae	Lenarviricota	Howeltoviricetes	Cryppavirales	Mitoviridae	Duamitovirus	Duamitovirus bevu1	2955768	ssRNA(+)	plants	Plants
BC-0302366298|k141_109864.6	AF218039	46.7	Orthornavirae	Pisuviricota	Pisoniviricetes	Picornavirales	Dicistroviridae	Cripavirus	Cricket paralysis virus	12136	ssRNA(+)	invertebrates	Invertebrates
BC-0302366298|k141_127254.4	AF039063	34.33	Orthornavirae	Lenarviricota	Amabiliviricetes	Wolframvirales	Narnaviridae	Narnavirus	Saccharomyces 20S RNA narnavirus	186772	ssRNA(+)	fungi	Fungi
BC-0302366298|k141_130806.2	MN532589	29.05	Orthornavirae	Lenarviricota	Miaviricetes	Ourlivirales	Botourmiaviridae	Betabotoulivirus	Betabotoulivirus betaplasmoparae	2955433	ssRNA(+)	other (specify)	Others
BC-0302366298|k141_136003.5	AF039063	31.78	Orthornavirae	Lenarviricota	Amabiliviricetes	Wolframvirales	Narnaviridae	Narnavirus	Saccharomyces 20S RNA narnavirus	186772	ssRNA(+)	fungi	Fungi
BC-0302366298|k141_146197.6	EF091714	100	Orthornavirae	Pisuviricota	Pisoniviricetes	Sobelivirales	Solemoviridae	Sobemovirus	Ryegrass mottle virus	119910	ssRNA(+)	plants	Plants
BC-0302366298|k141_18635.5	MN908947	100	Orthornavirae	Pisuviricota	Pisoniviricetes	Nidovirales	Coronaviridae	Betacoronavirus	Severe acute respiratory syndrome-related coronavirus	694009	ssRNA(+)	vertebrates	Vertebrates	human
BC-0302366298|k141_26761.1	V01408	100	Orthornavirae	Kitrinoviricota	Alsuviricetes	Martellivirales	Virgaviridae	Tobamovirus	Tobacco mosaic virus	12242	ssRNA(+)	plants	Plants
BC-0302366298|k141_33393.2	V01408	99.35	Orthornavirae	Kitrinoviricota	Alsuviricetes	Martellivirales	Virgaviridae	Tobamovirus	Tobacco mosaic virus	12242	ssRNA(+)	plants	Plants
BC-0302366298|k141_38991.2	D32136	65.58	Orthornavirae	Kitrinoviricota	Alsuviricetes	Martellivirales	Endornaviridae	Alphaendornavirus	Oryza sativa alphaendornavirus	362693	ssRNA(+)	plants	Plants
BC-0302366298|k141_43551.5	U15729	94.54	Orthornavirae	Kitrinoviricota	Alsuviricetes	Martellivirales	Bromoviridae	Cucumovirus	Peanut stunt virus	12313	ssRNA(+)	plants	Plants
BC-0302366298|k141_56490.2	V01408	98.7	Orthornavirae	Kitrinoviricota	Alsuviricetes	Martellivirales	Virgaviridae	Tobamovirus	Tobacco mosaic virus	12242	ssRNA(+)	plants	Plants
BC-0302366298|k141_58386.1	AB569997	54.4	Orthornavirae	Pisuviricota	Duplopiviricetes	Durnavirales	Partitiviridae	Alphapartitivirus	Rosellinia necatrix partitivirus 2	859651	dsRNA	fungi	Fungi
BC-0302366298|k141_59815.1	MN532659	66.67	Orthornavirae	Lenarviricota	Miaviricetes	Ourlivirales	Botourmiaviridae	Scleroulivirus	Scleroulivirus lambdaplasmoparae	2956413	ssRNA(+)	other (specify)	Others
BC-0302366298|k141_69522.2	MN532662	96.33	Orthornavirae	Lenarviricota	Miaviricetes	Ourlivirales	Botourmiaviridae	Scleroulivirus	Scleroulivirus xiplasmoparae	2956422	ssRNA(+)	other (specify)	Others
BC-0302366298|k141_77358.5	MG721540	61.95	Orthornavirae	Lenarviricota	Howeltoviricetes	Cryppavirales	Mitoviridae	Duamitovirus	Duamitovirus bevu1	2955768	ssRNA(+)	plants	Plants
BC-0302366298|k141_81020.4	FR851461	95.92	Orthornavirae	Pisuviricota	Pisoniviricetes	Picornavirales	Secoviridae	Nepovirus	Cherry leaf roll virus	12615	ssRNA(+)	plants	Plants
BC-0302366298|k141_87773.6	M34077	99.35	Orthornavirae	Kitrinoviricota	Alsuviricetes	Martellivirales	Virgaviridae	Tobamovirus	Tobacco mild green mosaic virus	12241	ssRNA(+)	plants	Plants
BC-0302366298|k141_88788.4	X01678	100	Orthornavirae	Kitrinoviricota	Alsuviricetes	Martellivirales	Bromoviridae	Bromovirus	Brome mosaic virus	12302	ssRNA(+)	plants	Plants
BC-0302366298|k141_96010.6	MN532589	30.41	Orthornavirae	Lenarviricota	Miaviricetes	Ourlivirales	Botourmiaviridae	Betabotoulivirus	Betabotoulivirus betaplasmoparae	2955433	ssRNA(+)	other (specify)	Others
BC-0302366298|k141_9895.3	AB569997	63.54	Orthornavirae	Pisuviricota	Duplopiviricetes	Durnavirales	Partitiviridae	Alphapartitivirus	Rosellinia necatrix partitivirus 2	859651	dsRNA	fungi	Fungi
BC-0302366368|k141_103571.4	MN532663	93.16	Orthornavirae	Lenarviricota	Miaviricetes	Ourlivirales	Botourmiaviridae	Scleroulivirus	Scleroulivirus omicronplasmoparae	2956417	ssRNA(+)	other (specify)	Others
BC-0302366368|k141_103924.4	MN532662	97.44	Orthornavirae	Lenarviricota	Miaviricetes	Ourlivirales	Botourmiaviridae	Scleroulivirus	Scleroulivirus xiplasmoparae	2956422	ssRNA(+)	other (specify)	Others
BC-0302366368|k141_105272.6	HQ871931	90.99	Orthornavirae	Kitrinoviricota	Magsaviricetes	Nodamuvirales	Sinhaliviridae	Sinaivirus	Lake Sinai virus 1	1041806	ssRNA(+)	invertebrates	Invertebrates
BC-0302366368|k141_10885.4	AJ489744	99.62	Orthornavirae	Pisuviricota	Pisoniviricetes	Picornavirales	Iflaviridae	Iflavirus	Deformed wing virus	198112	ssRNA(+)	invertebrates	Invertebrates
BC-0302366368|k141_15203.3	AF039063	31.78	Orthornavirae	Lenarviricota	Amabiliviricetes	Wolframvirales	Narnaviridae	Narnavirus	Saccharomyces 20S RNA narnavirus	186772	ssRNA(+)	fungi	Fungi
BC-0302366368|k141_21173.2	FR851461	97.01	Orthornavirae	Pisuviricota	Pisoniviricetes	Picornavirales	Secoviridae	Nepovirus	Cherry leaf roll virus	12615	ssRNA(+)	plants	Plants
BC-0302366368|k141_21640.4	AB569997	54.4	Orthornavirae	Pisuviricota	Duplopiviricetes	Durnavirales	Partitiviridae	Alphapartitivirus	Rosellinia necatrix partitivirus 2	859651	dsRNA	fungi	Fungi
BC-0302366368|k141_25116.1	KC610514	61.16	Orthornavirae	Duplornaviricota	Chrymotiviricetes	Ghabrivirales	Totiviridae	Totivirus	Scheffersomyces segobiensis virus L	1300323	dsRNA	fungi	Fungi
BC-0302366368|k141_3390.4	AB569997	63.54	Orthornavirae	Pisuviricota	Duplopiviricetes	Durnavirales	Partitiviridae	Alphapartitivirus	Rosellinia necatrix partitivirus 2	859651	dsRNA	fungi	Fungi
BC-0302366368|k141_35094.5	MN532616	63.3	Orthornavirae	Lenarviricota	Miaviricetes	Ourlivirales	Botourmiaviridae	Magoulivirus	Magoulivirus omegaplasmoparae	2956168	ssRNA(+)	other (specify)	Others
BC-0302366368|k141_56711.5	FR851461	93.81	Orthornavirae	Pisuviricota	Pisoniviricetes	Picornavirales	Secoviridae	Nepovirus	Cherry leaf roll virus	12615	ssRNA(+)	plants	Plants
BC-0302366368|k141_69692.1	MN908947	100	Orthornavirae	Pisuviricota	Pisoniviricetes	Nidovirales	Coronaviridae	Betacoronavirus	Severe acute respiratory syndrome-related coronavirus	694009	ssRNA(+)	vertebrates	Vertebrates	human
BC-0302366368|k141_7265.1	KC610514	61.16	Orthornavirae	Duplornaviricota	Chrymotiviricetes	Ghabrivirales	Totiviridae	Totivirus	Scheffersomyces segobiensis virus L	1300323	dsRNA	fungi	Fungi
BC-0302366368|k141_76050.4	MN532613	100	Orthornavirae	Lenarviricota	Miaviricetes	Ourlivirales	Botourmiaviridae	Magoulivirus	Magoulivirus jiplasmoparae	2956162	ssRNA(+)	other (specify)	Others
BC-0302366368|k141_7730.5	AF039063	54.62	Orthornavirae	Lenarviricota	Amabiliviricetes	Wolframvirales	Narnaviridae	Narnavirus	Saccharomyces 20S RNA narnavirus	186772	ssRNA(+)	fungi	Fungi
BC-0302366368|k141_78250.4	MN532594	31.18	Orthornavirae	Lenarviricota	Miaviricetes	Ourlivirales	Botourmiaviridae	Magoulivirus	Magoulivirus gammaplasmoparae	2956159	ssRNA(+)	other (specify)	Others
BC-0302366368|k141_9210.2	KC610514	52.5	Orthornavirae	Duplornaviricota	Chrymotiviricetes	Ghabrivirales	Totiviridae	Totivirus	Scheffersomyces segobiensis virus L	1300323	dsRNA	fungi	Fungi
BC-0302366368|k141_97485.1	MN532677	86.94	Orthornavirae	Lenarviricota	Miaviricetes	Ourlivirales	Botourmiaviridae	Penoulivirus	Penoulivirus thetaplasmoparae	2956296	ssRNA(+)	other (specify)	Others
BC-0302366368|k141_99180.4	U15729	94.54	Orthornavirae	Kitrinoviricota	Alsuviricetes	Martellivirales	Bromoviridae	Cucumovirus	Peanut stunt virus	12313	ssRNA(+)	plants	Plants
BC-0302366650|k141_105724.4	KX884002	32.37	Orthornavirae	Negarnaviricota	Chunqiuviricetes	Muvirales	Qinviridae	Yingvirus	Yingvirus wenzhouense	2507503	ssRNA(-)	invertebrates	Invertebrates
BC-0302366650|k141_118590.6	AY496069	91.23	Orthornavirae	Kitrinoviricota	Alsuviricetes	Martellivirales	Bromoviridae	Ilarvirus	Parietaria mottle virus	64958	ssRNA(+)	plants	Plants
BC-0302366650|k141_126942.2	MN908947	100	Orthornavirae	Pisuviricota	Pisoniviricetes	Nidovirales	Coronaviridae	Betacoronavirus	Severe acute respiratory syndrome-related coronavirus	694009	ssRNA(+)	vertebrates	Vertebrates	human
BC-0302366650|k141_127793.1	AY496069	91.3	Orthornavirae	Kitrinoviricota	Alsuviricetes	Martellivirales	Bromoviridae	Ilarvirus	Parietaria mottle virus	64958	ssRNA(+)	plants	Plants
BC-0302366650|k141_133120.1	AB569997	63.54	Orthornavirae	Pisuviricota	Duplopiviricetes	Durnavirales	Partitiviridae	Alphapartitivirus	Rosellinia necatrix partitivirus 2	859651	dsRNA	fungi	Fungi
BC-0302366650|k141_133819.4	MG721540	57.52	Orthornavirae	Lenarviricota	Howeltoviricetes	Cryppavirales	Mitoviridae	Duamitovirus	Duamitovirus bevu1	2955768	ssRNA(+)	plants	Plants
BC-0302366650|k141_17394.5	MK279481	59.09	Orthornavirae	Lenarviricota	Miaviricetes	Ourlivirales	Botourmiaviridae	Penoulivirus	Aspergillus penoulivirus	2843742	ssRNA(+)	fungi	Fungi
BC-0302366650|k141_29328.4	EU770623	63.7	Orthornavirae	Lenarviricota	Miaviricetes	Ourlivirales	Botourmiaviridae	Ourmiavirus	Ourmia melon virus	186786	ssRNA(+)	plants	Plants
BC-0302366650|k141_2979.2	KU187189	37.81	Orthornavirae	Kitrinoviricota	Tolucaviricetes	Tolivirales	Tombusviridae	Tombusvirus	Pelargonium leaf curl virus	35280	ssRNA(+)	plants	Plants
BC-0302366650|k141_29921.1	KY056254	21.74	Orthornavirae	Pisuviricota	Pisoniviricetes	Nidovirales	Mesoniviridae	Alphamesonivirus	Alphamesonivirus 10	2734511	ssRNA(+)	invertebrates	Invertebrates	non_human_mammalia
BC-0302366650|k141_39222.5	V01408	100	Orthornavirae	Kitrinoviricota	Alsuviricetes	Martellivirales	Virgaviridae	Tobamovirus	Tobacco mosaic virus	12242	ssRNA(+)	plants	Plants
BC-0302366650|k141_48147.6	MK584847	56.25	Orthornavirae	Lenarviricota	Miaviricetes	Ourlivirales	Botourmiaviridae	Magoulivirus	Cladosporium magoulivirus 2	2843962	ssRNA(+)	fungi	Fungi
BC-0302366650|k141_51255.4	AB569997	54.4	Orthornavirae	Pisuviricota	Duplopiviricetes	Durnavirales	Partitiviridae	Alphapartitivirus	Rosellinia necatrix partitivirus 2	859651	dsRNA	fungi	Fungi
BC-0302366650|k141_5273.5	MG020024	28.68	Orthornavirae	Kitrinoviricota	Alsuviricetes	Hepelivirales	Hepeviridae	Rocahepevirus	Rocahepevirus eothenomi	NA	ssRNA(+)	vertebrates	Vertebrates
BC-0302366650|k141_57863.4	U22521	31.25	Orthornavirae	Pisuviricota	Pisoniviricetes	Picornavirales	Picornaviridae	Enterovirus	Enterovirus A	138948	ssRNA(+)	vertebrates	Vertebrates	human
BC-0302366650|k141_67351.6	MG721540	52.08	Orthornavirae	Lenarviricota	Howeltoviricetes	Cryppavirales	Mitoviridae	Duamitovirus	Duamitovirus bevu1	2955768	ssRNA(+)	plants	Plants
BC-0302366650|k141_87177.1	MN532595	52.94	Orthornavirae	Lenarviricota	Miaviricetes	Ourlivirales	Botourmiaviridae	Magoulivirus	Magoulivirus deltaplasmoparae	2956155	ssRNA(+)	other (specify)	Others
BC-0302366650|k141_9095.6	U15729	94.54	Orthornavirae	Kitrinoviricota	Alsuviricetes	Martellivirales	Bromoviridae	Cucumovirus	Peanut stunt virus	12313	ssRNA(+)	plants	Plants
BC-0302366650|k141_94209.2	FR851461	96.43	Orthornavirae	Pisuviricota	Pisoniviricetes	Picornavirales	Secoviridae	Nepovirus	Cherry leaf roll virus	12615	ssRNA(+)	plants	Plants
BC-0302366650|k141_97602.2	MG721540	65.52	Orthornavirae	Lenarviricota	Howeltoviricetes	Cryppavirales	Mitoviridae	Duamitovirus	Duamitovirus bevu1	2955768	ssRNA(+)	plants	Plants
BC-0302368124|k141_107785.4	U15729	94.54	Orthornavirae	Kitrinoviricota	Alsuviricetes	Martellivirales	Bromoviridae	Cucumovirus	Peanut stunt virus	12313	ssRNA(+)	plants	Plants
BC-0302368124|k141_112000.4	AY881628	29.14	Orthornavirae	Kitrinoviricota	Alsuviricetes	Martellivirales	Closteroviridae	Closterovirus	Grapevine leafroll-associated virus 2	64003	ssRNA(+)	plants	Plants
BC-0302368124|k141_118553.4	AY496069	91.3	Orthornavirae	Kitrinoviricota	Alsuviricetes	Martellivirales	Bromoviridae	Ilarvirus	Parietaria mottle virus	64958	ssRNA(+)	plants	Plants
BC-0302368124|k141_126720.2	FR851461	96.43	Orthornavirae	Pisuviricota	Pisoniviricetes	Picornavirales	Secoviridae	Nepovirus	Cherry leaf roll virus	12615	ssRNA(+)	plants	Plants
BC-0302368124|k141_153329.4	AY496069	89.57	Orthornavirae	Kitrinoviricota	Alsuviricetes	Martellivirales	Bromoviridae	Ilarvirus	Parietaria mottle virus	64958	ssRNA(+)	plants	Plants
BC-0302368124|k141_161849.3	X01678	99.11	Orthornavirae	Kitrinoviricota	Alsuviricetes	Martellivirales	Bromoviridae	Bromovirus	Brome mosaic virus	12302	ssRNA(+)	plants	Plants
BC-0302368124|k141_182639.3	AB569997	63.54	Orthornavirae	Pisuviricota	Duplopiviricetes	Durnavirales	Partitiviridae	Alphapartitivirus	Rosellinia necatrix partitivirus 2	859651	dsRNA	fungi	Fungi
BC-0302368124|k141_183919.5	AF452884	34.12	Orthornavirae	Kitrinoviricota	Tolucaviricetes	Tolivirales	Tombusviridae	Betanecrovirus	Beet black scorch virus	196375	ssRNA(+)	plants	Plants
BC-0302368124|k141_186703.6	EF198242	27.32	Orthornavirae	Pisuviricota	Pisoniviricetes	Picornavirales	Marnaviridae	Locarnavirus	Jericarnavirus B	2560535	ssRNA(+)	marine (S)	Others
BC-0302368124|k141_193770.2	LC195294	67.9	Orthornavirae	Pisuviricota	Duplopiviricetes	Durnavirales	Partitiviridae	Deltapartitivirus	Pepper cryptic virus 2	1050903	dsRNA	plants	Plants
BC-0302368124|k141_33836.2	MK682513	27.94	Orthornavirae	Lenarviricota	Howeltoviricetes	Cryppavirales	Mitoviridae	Unuamitovirus	Unuamitovirus enmu1	2956593	ssRNA(+)	fungi	Fungi
BC-0302368124|k141_39552.4	MN386962	61.06	Orthornavirae	Lenarviricota	Miaviricetes	Ourlivirales	Botourmiaviridae	Penoulivirus	Penoulivirus malus	2956295	ssRNA(+)	plants	Plants
BC-0302368124|k141_4042.2	AB569997	54.4	Orthornavirae	Pisuviricota	Duplopiviricetes	Durnavirales	Partitiviridae	Alphapartitivirus	Rosellinia necatrix partitivirus 2	859651	dsRNA	fungi	Fungi
BC-0302368124|k141_4772.2	MN532613	99.1	Orthornavirae	Lenarviricota	Miaviricetes	Ourlivirales	Botourmiaviridae	Magoulivirus	Magoulivirus jiplasmoparae	2956162	ssRNA(+)	other (specify)	Others
BC-0302372746|k141_5478.6	MN908947	100	Orthornavirae	Pisuviricota	Pisoniviricetes	Nidovirales	Coronaviridae	Betacoronavirus	Severe acute respiratory syndrome-related coronavirus	694009	ssRNA(+)	vertebrates	Vertebrates	human
BC-0302372746|k141_999.4	U07551	48.99	Orthornavirae	Pisuviricota	Pisoniviricetes	Sobelivirales	Barnaviridae	Barnavirus	Mushroom bacilliform virus	32625	ssRNA(+)	fungi	Fungi
BC-0302375695|k141_13536.4	KJ415259	96.45	Orthornavirae	Kitrinoviricota	Alsuviricetes	Tymovirales	Betaflexiviridae	Carlavirus	Gaillardia latent virus	1468172	ssRNA(+)	plants	Plants
BC-0302375695|k141_13669.2	EU770623	62.33	Orthornavirae	Lenarviricota	Miaviricetes	Ourlivirales	Botourmiaviridae	Ourmiavirus	Ourmia melon virus	186786	ssRNA(+)	plants	Plants
BC-0302375695|k141_17193.1	JF729471	27.35	Orthornavirae	Kitrinoviricota	Alsuviricetes	Martellivirales	Virgaviridae	Tobamovirus	Rattail cactus necrosis-associated virus	1123754	ssRNA(+)	plants	Plants		yes
BC-0302375695|k141_1881.3	AY535004	32.05	Orthornavirae	Kitrinoviricota	Alsuviricetes	Hepelivirales	Hepeviridae	Avihepevirus	Avihepevirus magniiecur	1678144	ssRNA(+)	vertebrates	Vertebrates	non_human_mammalia
BC-0302375695|k141_21030.4	KX884062	46.4	Orthornavirae	Pisuviricota	Duplopiviricetes	Durnavirales	Picobirnaviridae	Orthopicobirnavirus	Orthopicobirnavirus beihaiense	NA	dsRNA	invertebrates	Invertebrates
BC-0302375695|k141_7004.2	V01408	100	Orthornavirae	Kitrinoviricota	Alsuviricetes	Martellivirales	Virgaviridae	Tobamovirus	Tobacco mosaic virus	12242	ssRNA(+)	plants	Plants
BC-0302375699|k141_12998.2	AJ295948	27.86	Orthornavirae	Kitrinoviricota	Alsuviricetes	Martellivirales	Virgaviridae	Tobamovirus	Kyuri green mottle mosaic virus	111970	ssRNA(+)	plants	Plants
BC-0302375699|k141_20194.6	V01408	100	Orthornavirae	Kitrinoviricota	Alsuviricetes	Martellivirales	Virgaviridae	Tobamovirus	Tobacco mosaic virus	12242	ssRNA(+)	plants	Plants
BC-0302375699|k141_2755.3	MN532677	86.73	Orthornavirae	Lenarviricota	Miaviricetes	Ourlivirales	Botourmiaviridae	Penoulivirus	Penoulivirus thetaplasmoparae	2956296	ssRNA(+)	other (specify)	Others
BC-0302375699|k141_58399.6	AY830918	48.24	Orthornavirae	Kitrinoviricota	Tolucaviricetes	Tolivirales	Tombusviridae	Tombusvirus	Grapevine Algerian latent virus	208084	ssRNA(+)	plants	Plants
BC-0302375699|k141_5868.4	HQ389540	28.69	Orthornavirae	Kitrinoviricota	Alsuviricetes	Martellivirales	Virgaviridae	Tobamovirus	Passion fruit mosaic virus	1032457	ssRNA(+)	plants	Plants
BC-0302375699|k141_69586.1	X83964	42.86	Orthornavirae	Kitrinoviricota	Tolucaviricetes	Tolivirales	Tombusviridae	Avenavirus	Oat chlorotic stunt virus	146762	ssRNA	plants	Plants
BC-0302382673|k141_1655.4	MN908947	100	Orthornavirae	Pisuviricota	Pisoniviricetes	Nidovirales	Coronaviridae	Betacoronavirus	Severe acute respiratory syndrome-related coronavirus	694009	ssRNA(+)	vertebrates	Vertebrates	human
BC-0302384150|k141_10210.6	M34077	100	Orthornavirae	Kitrinoviricota	Alsuviricetes	Martellivirales	Virgaviridae	Tobamovirus	Tobacco mild green mosaic virus	12241	ssRNA(+)	plants	Plants
BC-0302384150|k141_15515.1	HQ158596	69.75	Orthornavirae	Duplornaviricota	Chrymotiviricetes	Ghabrivirales	Totiviridae	Totivirus	Tuber aestivum virus 1	927810	dsRNA	fungi	Fungi
BC-0302384150|k141_15713.1	AF277675	36.09	Orthornavirae	Pisuviricota	Pisoniviricetes	Picornavirales	Dicistroviridae	Aparavirus	Taura syndrome virus	142102	ssRNA(+)	invertebrates	Invertebrates
BC-0302384150|k141_16855.3	MN532642	33.33	Orthornavirae	Lenarviricota	Miaviricetes	Ourlivirales	Botourmiaviridae	Betabotoulivirus	Betabotoulivirus etaplasmoparae	2955436	ssRNA(+)	other (specify)	Others
BC-0302384150|k141_19363.3	AF092924	32.19	Orthornavirae	Pisuviricota	Pisoniviricetes	Picornavirales	Iflaviridae	Iflavirus	Sacbrood virus	89463	ssRNA(+)	invertebrates	Invertebrates
BC-0302384150|k141_21164.1	U01060	60	Orthornavirae	Duplornaviricota	Chrymotiviricetes	Ghabrivirales	Totiviridae	Totivirus	Saccharomyces cerevisiae virus LBCLa	2170233	dsRNA	fungi	Fungi
BC-0302384150|k141_26746.4	J04692	71.9	Orthornavirae	Duplornaviricota	Chrymotiviricetes	Ghabrivirales	Totiviridae	Totivirus	Saccharomyces cerevisiae virus L-A	11008	dsRNA	fungi	Fungi
BC-0302384150|k141_49217.1	HE613269	32.99	Orthornavirae	Pisuviricota	Pisoniviricetes	Picornavirales	Secoviridae	Nepovirus	Grapevine deformation virus	233784	ssRNA(+)	plants	Plants
BC-0302384150|k141_51295.4	KC610514	61.16	Orthornavirae	Duplornaviricota	Chrymotiviricetes	Ghabrivirales	Totiviridae	Totivirus	Scheffersomyces segobiensis virus L	1300323	dsRNA	fungi	Fungi
BC-0302384150|k141_51451.3	U01060	62.39	Orthornavirae	Duplornaviricota	Chrymotiviricetes	Ghabrivirales	Totiviridae	Totivirus	Saccharomyces cerevisiae virus LBCLa	2170233	dsRNA	fungi	Fungi
BC-0302384150|k141_60441.5	AF484251	93.66	Orthornavirae	Kitrinoviricota	Alsuviricetes	Tymovirales	Alphaflexiviridae	Potexvirus	Pepino mosaic virus	112229	ssRNA(+)	plants	Plants
BC-0302384150|k141_60949.2	JX508291	56.93	Orthornavirae	Kitrinoviricota	Alsuviricetes	Tymovirales	Tymoviridae	Tymovirus	Andean potato latent virus	73819	ssRNA(+)	plants	Plants
BC-0302384150|k141_66349.6	KC610514	61.16	Orthornavirae	Duplornaviricota	Chrymotiviricetes	Ghabrivirales	Totiviridae	Totivirus	Scheffersomyces segobiensis virus L	1300323	dsRNA	fungi	Fungi
BC-0302384150|k141_67050.5	EF589670	58.38	Orthornavirae	Kitrinoviricota	Tolucaviricetes	Tolivirales	Tombusviridae	Aureusvirus	Maize white line mosaic virus	445227	ssRNA(+)	plants	Plants
BC-0302384150|k141_70134.2	KC610514	56.67	Orthornavirae	Duplornaviricota	Chrymotiviricetes	Ghabrivirales	Totiviridae	Totivirus	Scheffersomyces segobiensis virus L	1300323	dsRNA	fungi	Fungi
BC-0302384150|k141_73432.5	M81413	100	Orthornavirae	Kitrinoviricota	Alsuviricetes	Martellivirales	Virgaviridae	Tobamovirus	Pepper mild mottle virus	12239	ssRNA(+)	plants	Plants	human
BC-0302384150|k141_78477.1	U01060	60.83	Orthornavirae	Duplornaviricota	Chrymotiviricetes	Ghabrivirales	Totiviridae	Totivirus	Saccharomyces cerevisiae virus LBCLa	2170233	dsRNA	fungi	Fungi
BC-0302384150|k141_81141.3	MN908947	100	Orthornavirae	Pisuviricota	Pisoniviricetes	Nidovirales	Coronaviridae	Betacoronavirus	Severe acute respiratory syndrome-related coronavirus	694009	ssRNA(+)	vertebrates	Vertebrates	human
BC-0302384160|k141_45477.3	AB569997	63.54	Orthornavirae	Pisuviricota	Duplopiviricetes	Durnavirales	Partitiviridae	Alphapartitivirus	Rosellinia necatrix partitivirus 2	859651	dsRNA	fungi	Fungi
BC-0302384160|k141_51070.3	MG721540	61.95	Orthornavirae	Lenarviricota	Howeltoviricetes	Cryppavirales	Mitoviridae	Duamitovirus	Duamitovirus bevu1	2955768	ssRNA(+)	plants	Plants
BC-0302384160|k141_66425.1	LC195294	67.9	Orthornavirae	Pisuviricota	Duplopiviricetes	Durnavirales	Partitiviridae	Deltapartitivirus	Pepper cryptic virus 2	1050903	dsRNA	plants	Plants
BC-0302384208|k141_12876.5	AF332868	99.35	Orthornavirae	Kitrinoviricota	Alsuviricetes	Martellivirales	Virgaviridae	Tobamovirus	Tomato mosaic virus	12253	ssRNA(+)	plants	Plants
BC-0302384208|k141_19861.4	MN908947	100	Orthornavirae	Pisuviricota	Pisoniviricetes	Nidovirales	Coronaviridae	Betacoronavirus	Severe acute respiratory syndrome-related coronavirus	694009	ssRNA(+)	vertebrates	Vertebrates	human
BC-0302384208|k141_22993.6	MH732933	33.96	Orthornavirae	Lenarviricota	Howeltoviricetes	Cryppavirales	Mitoviridae	Duamitovirus	Duamitovirus rhir1	2955801	ssRNA(+)	fungi	Fungi
BC-0302384208|k141_34639.2	JN997472	56.1	Orthornavirae	Duplornaviricota	Chrymotiviricetes	Ghabrivirales	Totiviridae	Totivirus	Xanthophyllomyces dendrorhous virus L1A	1167690	dsRNA	fungi	Fungi
BC-0302384208|k141_49375.1	V01408	100	Orthornavirae	Kitrinoviricota	Alsuviricetes	Martellivirales	Virgaviridae	Tobamovirus	Tobacco mosaic virus	12242	ssRNA(+)	plants	Plants
BC-0302384208|k141_50010.1	BK013833	70.14	Orthornavirae	Lenarviricota	Leviviricetes	Norzivirales	Fiersviridae	Radbaivirus	Radbaivirus telluricola	2846026	ssRNA(+)	bacteria	Bacteria
BC-0302384208|k141_51933.3	AY613852	32.78	Orthornavirae	Kitrinoviricota	Tolucaviricetes	Tolivirales	Tombusviridae	Pelarspovirus	Pelargonium line pattern virus	167019	ssRNA(+)	plants	Plants
BC-0302384208|k141_9665.1	D55668	33.04	Orthornavirae	Pisuviricota	Duplopiviricetes	Durnavirales	Partitiviridae	Gammapartitivirus	Fusarium solani virus 1	1511847	dsRNA	fungi	Fungi
BC-0302384323|k141_169047.3	AB569997	54.4	Orthornavirae	Pisuviricota	Duplopiviricetes	Durnavirales	Partitiviridae	Alphapartitivirus	Rosellinia necatrix partitivirus 2	859651	dsRNA	fungi	Fungi
BC-0302384323|k141_39482.4	LC195294	71.68	Orthornavirae	Pisuviricota	Duplopiviricetes	Durnavirales	Partitiviridae	Deltapartitivirus	Pepper cryptic virus 2	1050903	dsRNA	plants	Plants
BC-0302384323|k141_46742.5	BK010348	68.91	Orthornavirae	Pisuviricota	Duplopiviricetes	Durnavirales	Amalgaviridae	Amalgavirus	Allium cepa amalgavirus 2	2058779	dsRNA	plants	Plants
BC-0302384323|k141_60705.2	AB569997	63.54	Orthornavirae	Pisuviricota	Duplopiviricetes	Durnavirales	Partitiviridae	Alphapartitivirus	Rosellinia necatrix partitivirus 2	859651	dsRNA	fungi	Fungi
BC-0302384770|k141_41066.6	MG721540	64.71	Orthornavirae	Lenarviricota	Howeltoviricetes	Cryppavirales	Mitoviridae	Duamitovirus	Duamitovirus bevu1	2955768	ssRNA(+)	plants	Plants
BC-0302384770|k141_42352.5	AB569997	63.54	Orthornavirae	Pisuviricota	Duplopiviricetes	Durnavirales	Partitiviridae	Alphapartitivirus	Rosellinia necatrix partitivirus 2	859651	dsRNA	fungi	Fungi
BC-0302385148|k141_100513.2	S63913	68.32	Orthornavirae	Pisuviricota	Duplopiviricetes	Durnavirales	Partitiviridae	Deltapartitivirus	Beet cryptic virus 3	29257	dsRNA	plants	Plants
BC-0302385148|k141_102421.4	AB569997	63.54	Orthornavirae	Pisuviricota	Duplopiviricetes	Durnavirales	Partitiviridae	Alphapartitivirus	Rosellinia necatrix partitivirus 2	859651	dsRNA	fungi	Fungi
BC-0302385148|k141_63478.4	LC195294	67.9	Orthornavirae	Pisuviricota	Duplopiviricetes	Durnavirales	Partitiviridae	Deltapartitivirus	Pepper cryptic virus 2	1050903	dsRNA	plants	Plants
BC-0302385148|k141_70488.6	MG721540	64.71	Orthornavirae	Lenarviricota	Howeltoviricetes	Cryppavirales	Mitoviridae	Duamitovirus	Duamitovirus bevu1	2955768	ssRNA(+)	plants	Plants
BC-0302385192|k141_100998.6	BK010429	64.65	Orthornavirae	Lenarviricota	Howeltoviricetes	Cryppavirales	Mitoviridae	Duamitovirus	Duamitovirus dapi1	2955778	ssRNA(+)	plants	Plants
BC-0302385192|k141_101181.4	M34077	100	Orthornavirae	Kitrinoviricota	Alsuviricetes	Martellivirales	Virgaviridae	Tobamovirus	Tobacco mild green mosaic virus	12241	ssRNA(+)	plants	Plants
BC-0302385192|k141_104030.6	FR851461	95.41	Orthornavirae	Pisuviricota	Pisoniviricetes	Picornavirales	Secoviridae	Nepovirus	Cherry leaf roll virus	12615	ssRNA(+)	plants	Plants
BC-0302385192|k141_109173.6	LC195294	67.9	Orthornavirae	Pisuviricota	Duplopiviricetes	Durnavirales	Partitiviridae	Deltapartitivirus	Pepper cryptic virus 2	1050903	dsRNA	plants	Plants
BC-0302385192|k141_110814.3	AB569997	63.54	Orthornavirae	Pisuviricota	Duplopiviricetes	Durnavirales	Partitiviridae	Alphapartitivirus	Rosellinia necatrix partitivirus 2	859651	dsRNA	fungi	Fungi
BC-0302385192|k141_135873.2	U22521	29.85	Orthornavirae	Pisuviricota	Pisoniviricetes	Picornavirales	Picornaviridae	Enterovirus	Enterovirus A	138948	ssRNA(+)	vertebrates	Vertebrates	human
BC-0302385192|k141_161641.4	MG721540	64.71	Orthornavirae	Lenarviricota	Howeltoviricetes	Cryppavirales	Mitoviridae	Duamitovirus	Duamitovirus bevu1	2955768	ssRNA(+)	plants	Plants
BC-0302385192|k141_167660.1	KR997836	36.15	Orthornavirae	Lenarviricota	Miaviricetes	Ourlivirales	Botourmiaviridae	Penoulivirus	Phomosis penoulivirus	2845835	ssRNA(+)	fungi	Fungi
BC-0302385192|k141_213591.2	S63913	68.32	Orthornavirae	Pisuviricota	Duplopiviricetes	Durnavirales	Partitiviridae	Deltapartitivirus	Beet cryptic virus 3	29257	dsRNA	plants	Plants
BC-0302385192|k141_62995.5	FR851461	96.43	Orthornavirae	Pisuviricota	Pisoniviricetes	Picornavirales	Secoviridae	Nepovirus	Cherry leaf roll virus	12615	ssRNA(+)	plants	Plants
BC-0302385563|k141_27206.4	V01408	100	Orthornavirae	Kitrinoviricota	Alsuviricetes	Martellivirales	Virgaviridae	Tobamovirus	Tobacco mosaic virus	12242	ssRNA(+)	plants	Plants
BC-0302385563|k141_38545.3	M34077	98.7	Orthornavirae	Kitrinoviricota	Alsuviricetes	Martellivirales	Virgaviridae	Tobamovirus	Tobacco mild green mosaic virus	12241	ssRNA(+)	plants	Plants
BC-0302385563|k141_41874.2	KC610514	61.16	Orthornavirae	Duplornaviricota	Chrymotiviricetes	Ghabrivirales	Totiviridae	Totivirus	Scheffersomyces segobiensis virus L	1300323	dsRNA	fungi	Fungi
BC-0302385563|k141_43511.4	V01408	100	Orthornavirae	Kitrinoviricota	Alsuviricetes	Martellivirales	Virgaviridae	Tobamovirus	Tobacco mosaic virus	12242	ssRNA(+)	plants	Plants
BC-0302385563|k141_4687.4	KC610514	60.33	Orthornavirae	Duplornaviricota	Chrymotiviricetes	Ghabrivirales	Totiviridae	Totivirus	Scheffersomyces segobiensis virus L	1300323	dsRNA	fungi	Fungi
BC-0302385563|k141_48411.3	AF484251	92.96	Orthornavirae	Kitrinoviricota	Alsuviricetes	Tymovirales	Alphaflexiviridae	Potexvirus	Pepino mosaic virus	112229	ssRNA(+)	plants	Plants
BC-0302385563|k141_56412.5	KT383474	100	Orthornavirae	Kitrinoviricota	Alsuviricetes	Martellivirales	Virgaviridae	Tobamovirus	Tomato brown rugose fruit virus	1761477	ssRNA(+)	plants	Plants
BC-0302385563|k141_63866.2	MN908947	100	Orthornavirae	Pisuviricota	Pisoniviricetes	Nidovirales	Coronaviridae	Betacoronavirus	Severe acute respiratory syndrome-related coronavirus	694009	ssRNA(+)	vertebrates	Vertebrates	human
BC-0302385564|k141_128129.2	AB569997	63.54	Orthornavirae	Pisuviricota	Duplopiviricetes	Durnavirales	Partitiviridae	Alphapartitivirus	Rosellinia necatrix partitivirus 2	859651	dsRNA	fungi	Fungi
BC-0302385564|k141_89652.2	MG721540	59.81	Orthornavirae	Lenarviricota	Howeltoviricetes	Cryppavirales	Mitoviridae	Duamitovirus	Duamitovirus bevu1	2955768	ssRNA(+)	plants	Plants
BC-0302386225|k141_13102.6	KT598226	33.82	Orthornavirae	Kitrinoviricota	Alsuviricetes	Tymovirales	Deltaflexiviridae	Deltaflexivirus	Soybean-associated deltaflexivirus 1	2169866	ssRNA(+)	plants	Plants
BC-0302386225|k141_16974.4	MK279481	60.18	Orthornavirae	Lenarviricota	Miaviricetes	Ourlivirales	Botourmiaviridae	Penoulivirus	Aspergillus penoulivirus	2843742	ssRNA(+)	fungi	Fungi
BC-0302386225|k141_44414.3	HQ389540	29.88	Orthornavirae	Kitrinoviricota	Alsuviricetes	Martellivirales	Virgaviridae	Tobamovirus	Passion fruit mosaic virus	1032457	ssRNA(+)	plants	Plants
BC-0302386225|k141_45758.6	HQ871931	90.99	Orthornavirae	Kitrinoviricota	Magsaviricetes	Nodamuvirales	Sinhaliviridae	Sinaivirus	Lake Sinai virus 1	1041806	ssRNA(+)	invertebrates	Invertebrates
BC-0302386225|k141_56588.1	AB569997	63.54	Orthornavirae	Pisuviricota	Duplopiviricetes	Durnavirales	Partitiviridae	Alphapartitivirus	Rosellinia necatrix partitivirus 2	859651	dsRNA	fungi	Fungi
BC-0302386225|k141_65328.6	MG721540	61.95	Orthornavirae	Lenarviricota	Howeltoviricetes	Cryppavirales	Mitoviridae	Duamitovirus	Duamitovirus bevu1	2955768	ssRNA(+)	plants	Plants
BC-0302386225|k141_71582.6	AJ295948	27.86	Orthornavirae	Kitrinoviricota	Alsuviricetes	Martellivirales	Virgaviridae	Tobamovirus	Kyuri green mottle mosaic virus	111970	ssRNA(+)	plants	Plants
BC-0302386225|k141_72102.6	LT221868	79.65	Orthornavirae	Kitrinoviricota	Alsuviricetes	Martellivirales	Mayoviridae	Idaeovirus	Idaeovirus ligustri	2560648	ssRNA(+)	plants	Plants
BC-0302386225|k141_907.4	U22521	29.85	Orthornavirae	Pisuviricota	Pisoniviricetes	Picornavirales	Picornaviridae	Enterovirus	Enterovirus A	138948	ssRNA(+)	vertebrates	Vertebrates	human
BC-0302386425|k141_4024.2	MN908947	100	Orthornavirae	Pisuviricota	Pisoniviricetes	Nidovirales	Coronaviridae	Betacoronavirus	Severe acute respiratory syndrome-related coronavirus	694009	ssRNA(+)	vertebrates	Vertebrates	human
BC-0302386497|k141_6359.1	MN908947	100	Orthornavirae	Pisuviricota	Pisoniviricetes	Nidovirales	Coronaviridae	Betacoronavirus	Severe acute respiratory syndrome-related coronavirus	694009	ssRNA(+)	vertebrates	Vertebrates	human
BC-0302389496|k141_104881.3	MK682513	34.18	Orthornavirae	Lenarviricota	Howeltoviricetes	Cryppavirales	Mitoviridae	Unuamitovirus	Unuamitovirus enmu1	2956593	ssRNA(+)	fungi	Fungi
BC-0302389496|k141_12068.4	AY496069	89.62	Orthornavirae	Kitrinoviricota	Alsuviricetes	Martellivirales	Bromoviridae	Ilarvirus	Parietaria mottle virus	64958	ssRNA(+)	plants	Plants
BC-0302389496|k141_15797.4	MN532622	71.15	Orthornavirae	Lenarviricota	Miaviricetes	Ourlivirales	Botourmiaviridae	Betascleroulivirus	Betascleroulivirus betaplasmoparae	2955478	ssRNA(+)	other (specify)	Others
BC-0302389496|k141_16482.6	X82547	93.62	Orthornavirae	Kitrinoviricota	Alsuviricetes	Tymovirales	Betaflexiviridae	Capillovirus	Cherry virus A	42882	ssRNA(+)	plants	Plants
BC-0302389496|k141_1652.1	MN532677	86.94	Orthornavirae	Lenarviricota	Miaviricetes	Ourlivirales	Botourmiaviridae	Penoulivirus	Penoulivirus thetaplasmoparae	2956296	ssRNA(+)	other (specify)	Others
BC-0302389496|k141_18268.1	MN473199	61.42	Orthornavirae	Lenarviricota	Miaviricetes	Ourlivirales	Botourmiaviridae	Penoulivirus	Phoma penoulivirus	2845834	ssRNA(+)	fungi	Fungi
BC-0302389496|k141_21823.4	X85989	44.91	Orthornavirae	Kitrinoviricota	Tolucaviricetes	Tolivirales	Tombusviridae	Alphanecrovirus	Olive latent virus 1	47669	ssRNA(+)	plants	Plants
BC-0302389496|k141_26317.2	AY881628	24.67	Orthornavirae	Kitrinoviricota	Alsuviricetes	Martellivirales	Closteroviridae	Closterovirus	Grapevine leafroll-associated virus 2	64003	ssRNA(+)	plants	Plants
BC-0302389496|k141_3292.5	AJ295948	29.5	Orthornavirae	Kitrinoviricota	Alsuviricetes	Martellivirales	Virgaviridae	Tobamovirus	Kyuri green mottle mosaic virus	111970	ssRNA(+)	plants	Plants
BC-0302389496|k141_33487.6	AB025903	41.89	Orthornavirae	Pisuviricota	Duplopiviricetes	Durnavirales	Partitiviridae	Alphapartitivirus	Helicobasidium mompa partitivirus V70	344866	dsRNA	fungi	Fungi
BC-0302389496|k141_34020.2	AJ012005	28.57	Orthornavirae	Kitrinoviricota	Alsuviricetes	Martellivirales	Virgaviridae	Furovirus	Chinese wheat mosaic virus	83544	ssRNA(+)	plants	Plants
BC-0302389496|k141_34958.1	MN532659	70.18	Orthornavirae	Lenarviricota	Miaviricetes	Ourlivirales	Botourmiaviridae	Scleroulivirus	Scleroulivirus lambdaplasmoparae	2956413	ssRNA(+)	other (specify)	Others
BC-0302389496|k141_37030.1	AB176964	32.04	Orthornavirae	Duplornaviricota	Chrymotiviricetes	Ghabrivirales	Totiviridae	Victorivirus	Magnaporthe oryzae virus 1	271257	dsRNA	fungi	Fungi
BC-0302389496|k141_43379.6	MN473199	73.64	Orthornavirae	Lenarviricota	Miaviricetes	Ourlivirales	Botourmiaviridae	Penoulivirus	Phoma penoulivirus	2845834	ssRNA(+)	fungi	Fungi
BC-0302389496|k141_44734.1	FR687854	70.8	Orthornavirae	Pisuviricota	Duplopiviricetes	Durnavirales	Partitiviridae	Deltapartitivirus	Fig cryptic virus	882768	dsRNA	plants	Plants
BC-0302389496|k141_44993.3	V01408	100	Orthornavirae	Kitrinoviricota	Alsuviricetes	Martellivirales	Virgaviridae	Tobamovirus	Tobacco mosaic virus	12242	ssRNA(+)	plants	Plants
BC-0302389496|k141_47206.1	AY616760	50.6	Orthornavirae	Kitrinoviricota	Tolucaviricetes	Tolivirales	Tombusviridae	Alphanecrovirus	Olive mild mosaic virus	295090	ssRNA(+)	plants	Plants
BC-0302389496|k141_47352.6	MN532596	63.3	Orthornavirae	Lenarviricota	Miaviricetes	Ourlivirales	Botourmiaviridae	Magoulivirus	Magoulivirus epsilonplasmoparae	2956156	ssRNA(+)	other (specify)	Others
BC-0302389496|k141_51995.6	M34077	100	Orthornavirae	Kitrinoviricota	Alsuviricetes	Martellivirales	Virgaviridae	Tobamovirus	Tobacco mild green mosaic virus	12241	ssRNA(+)	plants	Plants
BC-0302389496|k141_52617.1	MN532653	62.31	Orthornavirae	Lenarviricota	Miaviricetes	Ourlivirales	Botourmiaviridae	Scleroulivirus	Scleroulivirus zetaplasmoparae	2956423	ssRNA(+)	other (specify)	Others
BC-0302389496|k141_58723.3	BK010429	54.39	Orthornavirae	Lenarviricota	Howeltoviricetes	Cryppavirales	Mitoviridae	Duamitovirus	Duamitovirus dapi1	2955778	ssRNA(+)	plants	Plants
BC-0302389496|k141_66274.4	V01408	100	Orthornavirae	Kitrinoviricota	Alsuviricetes	Martellivirales	Virgaviridae	Tobamovirus	Tobacco mosaic virus	12242	ssRNA(+)	plants	Plants
BC-0302389496|k141_70372.4	J04357	43.12	Orthornavirae	Kitrinoviricota	Tolucaviricetes	Tolivirales	Tombusviridae	Dianthovirus	Red clover necrotic mosaic virus	12267	ssRNA(+)	plants	Plants
BC-0302389496|k141_71880.1	X15511	54.32	Orthornavirae	Kitrinoviricota	Tolucaviricetes	Tolivirales	Tombusviridae	Tombusvirus	Cymbidium ringspot virus	12144	ssRNA(+)	plants	Plants
BC-0302389496|k141_83697.1	MN532594	66.04	Orthornavirae	Lenarviricota	Miaviricetes	Ourlivirales	Botourmiaviridae	Magoulivirus	Magoulivirus gammaplasmoparae	2956159	ssRNA(+)	other (specify)	Others
BC-0302389496|k141_84471.2	MF362666	24.79	Orthornavirae	Kitrinoviricota	Alsuviricetes	Martellivirales	Endornaviridae	Alphaendornavirus	Helianthus annuus alphaendornavirus	2184469	ssRNA(+)	plants	Plants
BC-0302389496|k141_87188.1	LC413501	70.91	Orthornavirae	Lenarviricota	Miaviricetes	Ourlivirales	Botourmiaviridae	Penoulivirus	Pyricularia penoulivirus	2846014	ssRNA(+)	fungi	Fungi
BC-0302389496|k141_89232.2	MN532632	62.16	Orthornavirae	Lenarviricota	Miaviricetes	Ourlivirales	Botourmiaviridae	Epsilonscleroulivirus	Epsilonscleroulivirus plasmoparae	2955871	ssRNA(+)	other (specify)	Others
BC-0302389496|k141_94780.4	D86123	54.94	Orthornavirae	Kitrinoviricota	Tolucaviricetes	Tolivirales	Tombusviridae	Betacarmovirus	Japanese iris necrotic ring virus	77344	ssRNA(+)	plants	Plants
BC-0302389496|k141_97685.2	AY100482	52.35	Orthornavirae	Kitrinoviricota	Tolucaviricetes	Tolivirales	Tombusviridae	Tombusvirus	Eggplant mottled crinkle virus	270256	ssRNA(+)	plants	Plants
BC-0302391435|k141_11700.3	MT353902	28.07	Orthornavirae	Negarnaviricota	Ellioviricetes	Bunyavirales	Phenuiviridae	Laulavirus	Grapevine laulavirus 4	2844686	ssRNA(-)	fungi	Fungi
BC-0302391435|k141_23962.6	LT221868	79.65	Orthornavirae	Kitrinoviricota	Alsuviricetes	Martellivirales	Mayoviridae	Idaeovirus	Idaeovirus ligustri	2560648	ssRNA(+)	plants	Plants
BC-0302391435|k141_25691.1	BK010429	54.39	Orthornavirae	Lenarviricota	Howeltoviricetes	Cryppavirales	Mitoviridae	Duamitovirus	Duamitovirus dapi1	2955778	ssRNA(+)	plants	Plants
BC-0302391435|k141_25982.3	MG721540	61.95	Orthornavirae	Lenarviricota	Howeltoviricetes	Cryppavirales	Mitoviridae	Duamitovirus	Duamitovirus bevu1	2955768	ssRNA(+)	plants	Plants
BC-0302391435|k141_30262.4	LC195294	67.9	Orthornavirae	Pisuviricota	Duplopiviricetes	Durnavirales	Partitiviridae	Deltapartitivirus	Pepper cryptic virus 2	1050903	dsRNA	plants	Plants
BC-0302391435|k141_3343.6	MG721540	62.16	Orthornavirae	Lenarviricota	Howeltoviricetes	Cryppavirales	Mitoviridae	Duamitovirus	Duamitovirus bevu1	2955768	ssRNA(+)	plants	Plants
BC-0302391435|k141_35315.5	MK372894	42.86	Orthornavirae	Lenarviricota	Howeltoviricetes	Cryppavirales	Mitoviridae	Duamitovirus	Duamitovirus rhso25	2955803	ssRNA(+)	fungi	Fungi
BC-0302391435|k141_439.2	AB569997	63.54	Orthornavirae	Pisuviricota	Duplopiviricetes	Durnavirales	Partitiviridae	Alphapartitivirus	Rosellinia necatrix partitivirus 2	859651	dsRNA	fungi	Fungi
BC-0302391435|k141_53280.4	AF014388	43.08	Orthornavirae	Pisuviricota	Pisoniviricetes	Picornavirales	Dicistroviridae	Cripavirus	Drosophila C virus	64279	ssRNA(+)	invertebrates	Invertebrates
BC-0302391435|k141_55521.2	KX015962	36.67	Orthornavirae	Kitrinoviricota	Alsuviricetes	Tymovirales	Deltaflexiviridae	Deltaflexivirus	Fusarium deltaflexivirus 1	2169864	ssRNA(+)	fungi	Fungi
BC-0302391435|k141_5664.2	MT591564	85.6	Orthornavirae	Pisuviricota	Pisoniviricetes	Picornavirales	Secoviridae	Nepovirus	Blueberry leaf mottle virus	38172	ssRNA(+)	plants	Plants
BC-0302391435|k141_65369.4	MK682513	27.94	Orthornavirae	Lenarviricota	Howeltoviricetes	Cryppavirales	Mitoviridae	Unuamitovirus	Unuamitovirus enmu1	2956593	ssRNA(+)	fungi	Fungi
BC-0302391435|k141_671.6	X06728	99.32	Orthornavirae	Kitrinoviricota	Alsuviricetes	Tymovirales	Alphaflexiviridae	Potexvirus	White clover mosaic virus	12188	ssRNA(+)	plants	Plants
BC-0302391435|k141_76700.4	V01408	99.35	Orthornavirae	Kitrinoviricota	Alsuviricetes	Martellivirales	Virgaviridae	Tobamovirus	Tobacco mosaic virus	12242	ssRNA(+)	plants	Plants
BC-0302391435|k141_81250.1	KT598226	33.82	Orthornavirae	Kitrinoviricota	Alsuviricetes	Tymovirales	Deltaflexiviridae	Deltaflexivirus	Soybean-associated deltaflexivirus 1	2169866	ssRNA(+)	plants	Plants
BC-0302391435|k141_85152.6	M34077	100	Orthornavirae	Kitrinoviricota	Alsuviricetes	Martellivirales	Virgaviridae	Tobamovirus	Tobacco mild green mosaic virus	12241	ssRNA(+)	plants	Plants
BC-0302391435|k141_86940.3	EF375551	98.7	Orthornavirae	Kitrinoviricota	Alsuviricetes	Martellivirales	Virgaviridae	Tobamovirus	Rehmannia mosaic virus	425279	ssRNA(+)	plants	Plants
BC-0302391435|k141_93028.1	V01408	100	Orthornavirae	Kitrinoviricota	Alsuviricetes	Martellivirales	Virgaviridae	Tobamovirus	Tobacco mosaic virus	12242	ssRNA(+)	plants	Plants
BC-0302391435|k141_93101.1	AY535004	37.97	Orthornavirae	Kitrinoviricota	Alsuviricetes	Hepelivirales	Hepeviridae	Avihepevirus	Avihepevirus magniiecur	1678144	ssRNA(+)	vertebrates	Vertebrates	non_human_mammalia
BC-0302391435|k141_94283.6	S63913	68.32	Orthornavirae	Pisuviricota	Duplopiviricetes	Durnavirales	Partitiviridae	Deltapartitivirus	Beet cryptic virus 3	29257	dsRNA	plants	Plants
BC-0302396242|k141_103289.4	MT353902	24.43	Orthornavirae	Negarnaviricota	Ellioviricetes	Bunyavirales	Phenuiviridae	Laulavirus	Grapevine laulavirus 4	2844686	ssRNA(-)	fungi	Fungi
BC-0302396242|k141_111720.3	EF589670	54.38	Orthornavirae	Kitrinoviricota	Tolucaviricetes	Tolivirales	Tombusviridae	Aureusvirus	Maize white line mosaic virus	445227	ssRNA(+)	plants	Plants
BC-0302396242|k141_24293.1	AB569997	63.54	Orthornavirae	Pisuviricota	Duplopiviricetes	Durnavirales	Partitiviridae	Alphapartitivirus	Rosellinia necatrix partitivirus 2	859651	dsRNA	fungi	Fungi
BC-0302396242|k141_32261.5	MF360790	26.8	Orthornavirae	Negarnaviricota	Monjiviricetes	Mononegavirales	Rhabdoviridae	Betaricinrhavirus	Betaricinrhavirus scapularis	2846146	ssRNA(-)	invertebrates	Invertebrates
BC-0302396242|k141_39853.6	LT221868	79.65	Orthornavirae	Kitrinoviricota	Alsuviricetes	Martellivirales	Mayoviridae	Idaeovirus	Idaeovirus ligustri	2560648	ssRNA(+)	plants	Plants
BC-0302396242|k141_41854.2	BK010429	48.25	Orthornavirae	Lenarviricota	Howeltoviricetes	Cryppavirales	Mitoviridae	Duamitovirus	Duamitovirus dapi1	2955778	ssRNA(+)	plants	Plants
BC-0302396242|k141_45535.6	S63913	68.32	Orthornavirae	Pisuviricota	Duplopiviricetes	Durnavirales	Partitiviridae	Deltapartitivirus	Beet cryptic virus 3	29257	dsRNA	plants	Plants
BC-0302396242|k141_65017.4	MT591564	90.48	Orthornavirae	Pisuviricota	Pisoniviricetes	Picornavirales	Secoviridae	Nepovirus	Blueberry leaf mottle virus	38172	ssRNA(+)	plants	Plants
BC-0302396242|k141_70970.1	HQ389540	29.88	Orthornavirae	Kitrinoviricota	Alsuviricetes	Martellivirales	Virgaviridae	Tobamovirus	Passion fruit mosaic virus	1032457	ssRNA(+)	plants	Plants
BC-0302396242|k141_74109.1	BK010429	45.22	Orthornavirae	Lenarviricota	Howeltoviricetes	Cryppavirales	Mitoviridae	Duamitovirus	Duamitovirus dapi1	2955778	ssRNA(+)	plants	Plants
BC-0302396242|k141_88748.1	MG721540	61.95	Orthornavirae	Lenarviricota	Howeltoviricetes	Cryppavirales	Mitoviridae	Duamitovirus	Duamitovirus bevu1	2955768	ssRNA(+)	plants	Plants
BC-0302396242|k141_89478.6	LC195294	67.9	Orthornavirae	Pisuviricota	Duplopiviricetes	Durnavirales	Partitiviridae	Deltapartitivirus	Pepper cryptic virus 2	1050903	dsRNA	plants	Plants
BC-0302396242|k141_92350.1	X85989	39.26	Orthornavirae	Kitrinoviricota	Tolucaviricetes	Tolivirales	Tombusviridae	Alphanecrovirus	Olive latent virus 1	47669	ssRNA(+)	plants	Plants
BC-0302396242|k141_99190.1	FR851461	92.86	Orthornavirae	Pisuviricota	Pisoniviricetes	Picornavirales	Secoviridae	Nepovirus	Cherry leaf roll virus	12615	ssRNA(+)	plants	Plants
BC-0302396250|k141_27015.5	MT353902	28.07	Orthornavirae	Negarnaviricota	Ellioviricetes	Bunyavirales	Phenuiviridae	Laulavirus	Grapevine laulavirus 4	2844686	ssRNA(-)	fungi	Fungi
BC-0302396250|k141_29986.1	FR851461	91.33	Orthornavirae	Pisuviricota	Pisoniviricetes	Picornavirales	Secoviridae	Nepovirus	Cherry leaf roll virus	12615	ssRNA(+)	plants	Plants
BC-0302396250|k141_50740.1	LT221868	79.65	Orthornavirae	Kitrinoviricota	Alsuviricetes	Martellivirales	Mayoviridae	Idaeovirus	Idaeovirus ligustri	2560648	ssRNA(+)	plants	Plants
BC-0302396250|k141_62364.3	MN557005	76	Orthornavirae	Negarnaviricota	Monjiviricetes	Mononegavirales	Mymonaviridae	Penicillimonavirus	Penicillimonavirus etaplasmoparae	2845791	ssRNA(-)	protist	Others
BC-0302396250|k141_65938.3	MG721540	61.95	Orthornavirae	Lenarviricota	Howeltoviricetes	Cryppavirales	Mitoviridae	Duamitovirus	Duamitovirus bevu1	2955768	ssRNA(+)	plants	Plants
BC-0302396250|k141_73301.4	BK010429	48.25	Orthornavirae	Lenarviricota	Howeltoviricetes	Cryppavirales	Mitoviridae	Duamitovirus	Duamitovirus dapi1	2955778	ssRNA(+)	plants	Plants
BC-0302396250|k141_73340.5	AB569997	63.54	Orthornavirae	Pisuviricota	Duplopiviricetes	Durnavirales	Partitiviridae	Alphapartitivirus	Rosellinia necatrix partitivirus 2	859651	dsRNA	fungi	Fungi
BC-0302396250|k141_79039.4	AY535016	33.14	Orthornavirae	Negarnaviricota	Milneviricetes	Serpentovirales	Aspiviridae	Ophiovirus	Ophiovirus lactucae	2170047	ssRNA(-)	plants	Plants
BC-0302396692|k141_14858.2	MN908947	100	Orthornavirae	Pisuviricota	Pisoniviricetes	Nidovirales	Coronaviridae	Betacoronavirus	Severe acute respiratory syndrome-related coronavirus	694009	ssRNA(+)	vertebrates	Vertebrates	human
BC-0302396692|k141_1492.1	MK682517	30.41	Orthornavirae	Lenarviricota	Howeltoviricetes	Cryppavirales	Mitoviridae	Unuamitovirus	Unuamitovirus enmu5	2956597	ssRNA(+)	fungi	Fungi
BC-0302396692|k141_14978.3	MN532631	62.93	Orthornavirae	Lenarviricota	Miaviricetes	Ourlivirales	Botourmiaviridae	Scleroulivirus	Scleroulivirus alphaplasmoparae	2956405	ssRNA(+)	other (specify)	Others
BC-0302396692|k141_21558.4	KP900921	62.07	Orthornavirae	Lenarviricota	Miaviricetes	Ourlivirales	Botourmiaviridae	Magoulivirus	Rhizoctonia magoulivirus 1	2560704	ssRNA(+)	fungi	Fungi
BC-0302396692|k141_2317.2	MN532664	88.89	Orthornavirae	Lenarviricota	Miaviricetes	Ourlivirales	Botourmiaviridae	Scleroulivirus	Scleroulivirus piplasmoparae	2956418	ssRNA(+)	other (specify)	Others
BC-0302396692|k141_23885.3	MN473199	73.64	Orthornavirae	Lenarviricota	Miaviricetes	Ourlivirales	Botourmiaviridae	Penoulivirus	Phoma penoulivirus	2845834	ssRNA(+)	fungi	Fungi
BC-0302396692|k141_2676.6	AF329080	95.09	Orthornavirae	Kitrinoviricota	Magsaviricetes	Nodamuvirales	Nodaviridae	Alphanodavirus	Boolarra virus	12286	ssRNA(+)	invertebrates	Invertebrates
BC-0302396692|k141_30059.6	KY432927	26.07	Orthornavirae	Pisuviricota	Pisoniviricetes	Picornavirales	Picornaviridae	Parabovirus	Parabovirus B	NA	ssRNA(+)	vertebrates	Vertebrates
BC-0302396692|k141_32186.2	AF171942	34.73	Orthornavirae	Kitrinoviricota	Magsaviricetes	Nodamuvirales	Nodaviridae	Alphanodavirus	Pariacoto virus	103782	ssRNA(+)	invertebrates	Invertebrates
BC-0302396692|k141_37385.6	U22521	30.16	Orthornavirae	Pisuviricota	Pisoniviricetes	Picornavirales	Picornaviridae	Enterovirus	Enterovirus A	138948	ssRNA(+)	vertebrates	Vertebrates	human
BC-0302396692|k141_40722.2	U90136	29.86	Orthornavirae	Lenarviricota	Amabiliviricetes	Wolframvirales	Narnaviridae	Narnavirus	Saccharomyces 23S RNA narnavirus	198599	ssRNA(+)	fungi	Fungi
BC-0302396692|k141_59128.5	MN532632	53.92	Orthornavirae	Lenarviricota	Miaviricetes	Ourlivirales	Botourmiaviridae	Epsilonscleroulivirus	Epsilonscleroulivirus plasmoparae	2955871	ssRNA(+)	other (specify)	Others
BC-0302396692|k141_69706.3	AM999771	41.49	Orthornavirae	Pisuviricota	Duplopiviricetes	Durnavirales	Partitiviridae	Alphapartitivirus	Chondrostereum purpureum cryptic virus 1	529380	dsRNA	fungi	Fungi
BC-0302396692|k141_71292.3	MN532614	60.55	Orthornavirae	Lenarviricota	Miaviricetes	Ourlivirales	Botourmiaviridae	Magoulivirus	Magoulivirus psiplasmoparae	2956171	ssRNA(+)	other (specify)	Others
BC-0302396692|k141_82442.1	LC413501	27.92	Orthornavirae	Lenarviricota	Miaviricetes	Ourlivirales	Botourmiaviridae	Penoulivirus	Pyricularia penoulivirus	2846014	ssRNA(+)	fungi	Fungi
BC-0302396692|k141_969.1	AM711119	38.79	Orthornavirae	Kitrinoviricota	Tolucaviricetes	Tolivirales	Tombusviridae	Tombusvirus	Eggplant mottled crinkle virus	270256	ssRNA(+)	plants	Plants
BC-0302396692|k141_97732.4	MN532594	50.96	Orthornavirae	Lenarviricota	Miaviricetes	Ourlivirales	Botourmiaviridae	Magoulivirus	Magoulivirus gammaplasmoparae	2956159	ssRNA(+)	other (specify)	Others
BC-0302402878|k141_100333.2	KJ418374	77.78	Orthornavirae	Duplornaviricota	Chrymotiviricetes	Ghabrivirales	Chrysoviridae	Alphachrysovirus	Alphachrysovirus perseae	2955248	dsRNA	plants (S)	Plants
BC-0302402878|k141_102486.1	LC195294	67.9	Orthornavirae	Pisuviricota	Duplopiviricetes	Durnavirales	Partitiviridae	Deltapartitivirus	Pepper cryptic virus 2	1050903	dsRNA	plants	Plants
BC-0302402878|k141_107219.6	S63913	68.32	Orthornavirae	Pisuviricota	Duplopiviricetes	Durnavirales	Partitiviridae	Deltapartitivirus	Beet cryptic virus 3	29257	dsRNA	plants	Plants
BC-0302402878|k141_107439.5	JN997473	55.37	Orthornavirae	Duplornaviricota	Chrymotiviricetes	Ghabrivirales	Totiviridae	Totivirus	Xanthophyllomyces dendrorhous virus L1B	1167691	dsRNA	fungi	Fungi
BC-0302402878|k141_116975.1	U90136	31.25	Orthornavirae	Lenarviricota	Amabiliviricetes	Wolframvirales	Narnaviridae	Narnavirus	Saccharomyces 23S RNA narnavirus	198599	ssRNA(+)	fungi	Fungi
BC-0302402878|k141_119575.1	M34077	100	Orthornavirae	Kitrinoviricota	Alsuviricetes	Martellivirales	Virgaviridae	Tobamovirus	Tobacco mild green mosaic virus	12241	ssRNA(+)	plants	Plants
BC-0302402878|k141_26253.1	AB569997	63.02	Orthornavirae	Pisuviricota	Duplopiviricetes	Durnavirales	Partitiviridae	Alphapartitivirus	Rosellinia necatrix partitivirus 2	859651	dsRNA	fungi	Fungi
BC-0302402878|k141_27429.2	MT591564	89.68	Orthornavirae	Pisuviricota	Pisoniviricetes	Picornavirales	Secoviridae	Nepovirus	Blueberry leaf mottle virus	38172	ssRNA(+)	plants	Plants
BC-0302402878|k141_47560.5	V01408	100	Orthornavirae	Kitrinoviricota	Alsuviricetes	Martellivirales	Virgaviridae	Tobamovirus	Tobacco mosaic virus	12242	ssRNA(+)	plants	Plants
BC-0302402878|k141_49754.6	AF014388	43.08	Orthornavirae	Pisuviricota	Pisoniviricetes	Picornavirales	Dicistroviridae	Cripavirus	Drosophila C virus	64279	ssRNA(+)	invertebrates	Invertebrates
BC-0302402878|k141_54763.5	MG721540	64.71	Orthornavirae	Lenarviricota	Howeltoviricetes	Cryppavirales	Mitoviridae	Duamitovirus	Duamitovirus bevu1	2955768	ssRNA(+)	plants	Plants
BC-0302402878|k141_6137.4	EF375551	100	Orthornavirae	Kitrinoviricota	Alsuviricetes	Martellivirales	Virgaviridae	Tobamovirus	Rehmannia mosaic virus	425279	ssRNA(+)	plants	Plants
BC-0302402878|k141_62358.1	MG721540	61.95	Orthornavirae	Lenarviricota	Howeltoviricetes	Cryppavirales	Mitoviridae	Duamitovirus	Duamitovirus bevu1	2955768	ssRNA(+)	plants	Plants
BC-0302402878|k141_76270.6	MK372894	42.24	Orthornavirae	Lenarviricota	Howeltoviricetes	Cryppavirales	Mitoviridae	Duamitovirus	Duamitovirus rhso25	2955803	ssRNA(+)	fungi	Fungi
BC-0302402878|k141_77772.6	MW289237	46.46	Orthornavirae	Pisuviricota	Pisoniviricetes	Picornavirales	Secoviridae	Waikavirus	Waikavirus PoLV1	2956677	ssRNA(+)	plants	Plants
BC-0302402878|k141_85094.5	LT221868	79.65	Orthornavirae	Kitrinoviricota	Alsuviricetes	Martellivirales	Mayoviridae	Idaeovirus	Idaeovirus ligustri	2560648	ssRNA(+)	plants	Plants
BC-0302402878|k141_87025.3	FN691934	81.62	Orthornavirae	Pisuviricota	Pisoniviricetes	Picornavirales	Secoviridae	Nepovirus	Grapevine Bulgarian latent virus	748667	ssRNA(+)	plants	Plants
BC-0302402878|k141_90002.4	MT353902	24.43	Orthornavirae	Negarnaviricota	Ellioviricetes	Bunyavirales	Phenuiviridae	Laulavirus	Grapevine laulavirus 4	2844686	ssRNA(-)	fungi	Fungi
BC-0302402878|k141_97755.4	V01408	100	Orthornavirae	Kitrinoviricota	Alsuviricetes	Martellivirales	Virgaviridae	Tobamovirus	Tobacco mosaic virus	12242	ssRNA(+)	plants	Plants
BC-0302403564|k141_15399.6	MT353902	24.65	Orthornavirae	Negarnaviricota	Ellioviricetes	Bunyavirales	Phenuiviridae	Laulavirus	Grapevine laulavirus 4	2844686	ssRNA(-)	fungi	Fungi
BC-0302403564|k141_17159.6	MG721540	61.95	Orthornavirae	Lenarviricota	Howeltoviricetes	Cryppavirales	Mitoviridae	Duamitovirus	Duamitovirus bevu1	2955768	ssRNA(+)	plants	Plants
BC-0302403564|k141_2003.2	MT591564	85.83	Orthornavirae	Pisuviricota	Pisoniviricetes	Picornavirales	Secoviridae	Nepovirus	Blueberry leaf mottle virus	38172	ssRNA(+)	plants	Plants
BC-0302403564|k141_25019.6	MN532636	31.25	Orthornavirae	Lenarviricota	Miaviricetes	Ourlivirales	Botourmiaviridae	Gammascleroulivirus	Gammascleroulivirus alphaplasmoparae	2955940	ssRNA(+)	other (specify)	Others
BC-0302403564|k141_34984.6	S63913	68.32	Orthornavirae	Pisuviricota	Duplopiviricetes	Durnavirales	Partitiviridae	Deltapartitivirus	Beet cryptic virus 3	29257	dsRNA	plants	Plants
BC-0302403564|k141_350.1	Y13463	32.65	Orthornavirae	Kitrinoviricota	Tolucaviricetes	Tolivirales	Tombusviridae	Gallantivirus	Galinsoga mosaic virus	60714	ssRNA(+)	plants	Plants
BC-0302403564|k141_35569.1	U15729	98.98	Orthornavirae	Kitrinoviricota	Alsuviricetes	Martellivirales	Bromoviridae	Cucumovirus	Peanut stunt virus	12313	ssRNA(+)	plants	Plants
BC-0302403564|k141_36848.4	KT581451	31.01	Orthornavirae	Kitrinoviricota	Alsuviricetes	Tymovirales	Deltaflexiviridae	Deltaflexivirus	Sclerotinia deltaflexivirus 1	2169865	ssRNA(+)	fungi	Fungi
BC-0302403564|k141_41717.5	LT221868	79.65	Orthornavirae	Kitrinoviricota	Alsuviricetes	Martellivirales	Mayoviridae	Idaeovirus	Idaeovirus ligustri	2560648	ssRNA(+)	plants	Plants
BC-0302403564|k141_50524.2	D32136	88.5	Orthornavirae	Kitrinoviricota	Alsuviricetes	Martellivirales	Endornaviridae	Alphaendornavirus	Oryza sativa alphaendornavirus	362693	ssRNA(+)	plants	Plants
BC-0302403564|k141_52069.3	U22521	29.85	Orthornavirae	Pisuviricota	Pisoniviricetes	Picornavirales	Picornaviridae	Enterovirus	Enterovirus A	138948	ssRNA(+)	vertebrates	Vertebrates	human
BC-0302403564|k141_81032.4	HQ158596	58.68	Orthornavirae	Duplornaviricota	Chrymotiviricetes	Ghabrivirales	Totiviridae	Totivirus	Tuber aestivum virus 1	927810	dsRNA	fungi	Fungi
BC-0302403564|k141_90182.2	D32136	100	Orthornavirae	Kitrinoviricota	Alsuviricetes	Martellivirales	Endornaviridae	Alphaendornavirus	Oryza sativa alphaendornavirus	362693	ssRNA(+)	plants	Plants
BC-0302403564|k141_98727.4	AB569997	63.54	Orthornavirae	Pisuviricota	Duplopiviricetes	Durnavirales	Partitiviridae	Alphapartitivirus	Rosellinia necatrix partitivirus 2	859651	dsRNA	fungi	Fungi
BC-0302406558|k141_14558.2	MN532613	100	Orthornavirae	Lenarviricota	Miaviricetes	Ourlivirales	Botourmiaviridae	Magoulivirus	Magoulivirus jiplasmoparae	2956162	ssRNA(+)	other (specify)	Others
BC-0302406558|k141_23624.6	KX884062	55.13	Orthornavirae	Pisuviricota	Duplopiviricetes	Durnavirales	Picobirnaviridae	Orthopicobirnavirus	Orthopicobirnavirus beihaiense	NA	dsRNA	invertebrates	Invertebrates
BC-0302406874|k141_1107.2	MN532601	69.3	Orthornavirae	Lenarviricota	Miaviricetes	Ourlivirales	Botourmiaviridae	Magoulivirus	Magoulivirus kappaplasmoparae	2956163	ssRNA(+)	other (specify)	Others
BC-0302406874|k141_1275.4	BK010429	44.83	Orthornavirae	Lenarviricota	Howeltoviricetes	Cryppavirales	Mitoviridae	Duamitovirus	Duamitovirus dapi1	2955778	ssRNA(+)	plants	Plants
BC-0302406874|k141_16755.2	MT062429	66.37	Orthornavirae	Lenarviricota	Miaviricetes	Ourlivirales	Botourmiaviridae	Magoulivirus	Magoulivirus alphamacrophominae	2956150	ssRNA(+)	fungi	Fungi
BC-0302406874|k141_231.4	MN532626	59.72	Orthornavirae	Lenarviricota	Miaviricetes	Ourlivirales	Botourmiaviridae	Betascleroulivirus	Betascleroulivirus epsilonplasmoparae	2955481	ssRNA(+)	other (specify)	Others
BC-0302406874|k141_2894.3	MN532609	75	Orthornavirae	Lenarviricota	Miaviricetes	Ourlivirales	Botourmiaviridae	Magoulivirus	Magoulivirus sigmaplasmoparae	2956173	ssRNA(+)	other (specify)	Others
BC-0302406874|k141_313.4	X83964	52.94	Orthornavirae	Kitrinoviricota	Tolucaviricetes	Tolivirales	Tombusviridae	Avenavirus	Oat chlorotic stunt virus	146762	ssRNA	plants	Plants
BC-0302406874|k141_5120.2	MN532661	58.27	Orthornavirae	Lenarviricota	Miaviricetes	Ourlivirales	Botourmiaviridae	Scleroulivirus	Scleroulivirus niplasmoparae	2956415	ssRNA(+)	other (specify)	Others
BC-0302406874|k141_5795.4	MN532591	32.51	Orthornavirae	Lenarviricota	Miaviricetes	Ourlivirales	Botourmiaviridae	Betabotoulivirus	Betabotoulivirus gammaplasmoparae	2955437	ssRNA(+)	other (specify)	Others
BC-0302406874|k141_8913.1	MN532604	66.67	Orthornavirae	Lenarviricota	Miaviricetes	Ourlivirales	Botourmiaviridae	Magoulivirus	Magoulivirus niplasmoparae	2956167	ssRNA(+)	other (specify)	Others
BC-0302406874|k141_9256.2	BK010429	54.32	Orthornavirae	Lenarviricota	Howeltoviricetes	Cryppavirales	Mitoviridae	Duamitovirus	Duamitovirus dapi1	2955778	ssRNA(+)	plants	Plants
BC-0302407946|k141_122908.2	BK010429	54.31	Orthornavirae	Lenarviricota	Howeltoviricetes	Cryppavirales	Mitoviridae	Duamitovirus	Duamitovirus dapi1	2955778	ssRNA(+)	plants	Plants
BC-0302407946|k141_124800.6	MN532610	30.36	Orthornavirae	Lenarviricota	Miaviricetes	Ourlivirales	Botourmiaviridae	Magoulivirus	Magoulivirus tauplasmoparae	2956174	ssRNA(+)	other (specify)	Others
BC-0302407946|k141_125389.1	AY100482	48.82	Orthornavirae	Kitrinoviricota	Tolucaviricetes	Tolivirales	Tombusviridae	Tombusvirus	Eggplant mottled crinkle virus	270256	ssRNA(+)	plants	Plants
BC-0302407946|k141_127297.4	BK010429	44.83	Orthornavirae	Lenarviricota	Howeltoviricetes	Cryppavirales	Mitoviridae	Duamitovirus	Duamitovirus dapi1	2955778	ssRNA(+)	plants	Plants
BC-0302407946|k141_132192.1	JN997473	67.77	Orthornavirae	Duplornaviricota	Chrymotiviricetes	Ghabrivirales	Totiviridae	Totivirus	Xanthophyllomyces dendrorhous virus L1B	1167691	dsRNA	fungi	Fungi
BC-0302407946|k141_24292.2	X82547	90.07	Orthornavirae	Kitrinoviricota	Alsuviricetes	Tymovirales	Betaflexiviridae	Capillovirus	Cherry virus A	42882	ssRNA(+)	plants	Plants
BC-0302407946|k141_26322.2	MN605481	26.72	Orthornavirae	Lenarviricota	Miaviricetes	Ourlivirales	Botourmiaviridae	Botoulivirus	Botoulivirus zetabotrytidis	2955529	ssRNA(+)	fungi	Fungi
BC-0302407946|k141_66666.2	MG721540	64.29	Orthornavirae	Lenarviricota	Howeltoviricetes	Cryppavirales	Mitoviridae	Duamitovirus	Duamitovirus bevu1	2955768	ssRNA(+)	plants	Plants
BC-0302407946|k141_74588.2	X82547	94.44	Orthornavirae	Kitrinoviricota	Alsuviricetes	Tymovirales	Betaflexiviridae	Capillovirus	Cherry virus A	42882	ssRNA(+)	plants	Plants
BC-0302407946|k141_78878.4	BK010429	44.83	Orthornavirae	Lenarviricota	Howeltoviricetes	Cryppavirales	Mitoviridae	Duamitovirus	Duamitovirus dapi1	2955778	ssRNA(+)	plants	Plants
BC-0302407946|k141_79099.2	J04692	56.67	Orthornavirae	Duplornaviricota	Chrymotiviricetes	Ghabrivirales	Totiviridae	Totivirus	Saccharomyces cerevisiae virus L-A	11008	dsRNA	fungi	Fungi
BC-0302407946|k141_84645.4	MF375889	25.16	Orthornavirae	Lenarviricota	Miaviricetes	Ourlivirales	Botourmiaviridae	Betabotoulivirus	Betabotoulivirus entoleucae	2844153	ssRNA(+)	fungi	Fungi
BC-0302407946|k141_87669.4	BK010429	56.99	Orthornavirae	Lenarviricota	Howeltoviricetes	Cryppavirales	Mitoviridae	Duamitovirus	Duamitovirus dapi1	2955778	ssRNA(+)	plants	Plants
BC-0302407946|k141_99077.6	BK010429	43.92	Orthornavirae	Lenarviricota	Howeltoviricetes	Cryppavirales	Mitoviridae	Duamitovirus	Duamitovirus dapi1	2955778	ssRNA(+)	plants	Plants
BC-0302408155|k141_137.1	BK010429	56.99	Orthornavirae	Lenarviricota	Howeltoviricetes	Cryppavirales	Mitoviridae	Duamitovirus	Duamitovirus dapi1	2955778	ssRNA(+)	plants	Plants
BC-0302408155|k141_1753.4	LC195294	72.22	Orthornavirae	Pisuviricota	Duplopiviricetes	Durnavirales	Partitiviridae	Deltapartitivirus	Pepper cryptic virus 2	1050903	dsRNA	plants	Plants
BC-0302408155|k141_2225.1	J04692	56.1	Orthornavirae	Duplornaviricota	Chrymotiviricetes	Ghabrivirales	Totiviridae	Totivirus	Saccharomyces cerevisiae virus L-A	11008	dsRNA	fungi	Fungi
BC-0302408155|k141_3003.6	MG721540	64.29	Orthornavirae	Lenarviricota	Howeltoviricetes	Cryppavirales	Mitoviridae	Duamitovirus	Duamitovirus bevu1	2955768	ssRNA(+)	plants	Plants
BC-0302408226|k141_1243.2	BK010429	56.99	Orthornavirae	Lenarviricota	Howeltoviricetes	Cryppavirales	Mitoviridae	Duamitovirus	Duamitovirus dapi1	2955778	ssRNA(+)	plants	Plants
BC-0302409392|k141_10595.1	V01408	99.35	Orthornavirae	Kitrinoviricota	Alsuviricetes	Martellivirales	Virgaviridae	Tobamovirus	Tobacco mosaic virus	12242	ssRNA(+)	plants	Plants
BC-0302409392|k141_3250.5	KT598226	36.57	Orthornavirae	Kitrinoviricota	Alsuviricetes	Tymovirales	Deltaflexiviridae	Deltaflexivirus	Soybean-associated deltaflexivirus 1	2169866	ssRNA(+)	plants	Plants
BC-0302409392|k141_47441.2	KC610514	60.33	Orthornavirae	Duplornaviricota	Chrymotiviricetes	Ghabrivirales	Totiviridae	Totivirus	Scheffersomyces segobiensis virus L	1300323	dsRNA	fungi	Fungi
BC-0302409422|k141_17106.1	V01408	100	Orthornavirae	Kitrinoviricota	Alsuviricetes	Martellivirales	Virgaviridae	Tobamovirus	Tobacco mosaic virus	12242	ssRNA(+)	plants	Plants
BC-0302409422|k141_32834.6	MN605481	29.45	Orthornavirae	Lenarviricota	Miaviricetes	Ourlivirales	Botourmiaviridae	Botoulivirus	Botoulivirus zetabotrytidis	2955529	ssRNA(+)	fungi	Fungi
BC-0302409434|k141_10224.3	KC610514	60.33	Orthornavirae	Duplornaviricota	Chrymotiviricetes	Ghabrivirales	Totiviridae	Totivirus	Scheffersomyces segobiensis virus L	1300323	dsRNA	fungi	Fungi
BC-0302409434|k141_16504.6	KC610514	51.67	Orthornavirae	Duplornaviricota	Chrymotiviricetes	Ghabrivirales	Totiviridae	Totivirus	Scheffersomyces segobiensis virus L	1300323	dsRNA	fungi	Fungi
BC-0302409434|k141_16883.1	KC610514	61.16	Orthornavirae	Duplornaviricota	Chrymotiviricetes	Ghabrivirales	Totiviridae	Totivirus	Scheffersomyces segobiensis virus L	1300323	dsRNA	fungi	Fungi
BC-0302409434|k141_19503.5	MN908947	100	Orthornavirae	Pisuviricota	Pisoniviricetes	Nidovirales	Coronaviridae	Betacoronavirus	Severe acute respiratory syndrome-related coronavirus	694009	ssRNA(+)	vertebrates	Vertebrates	human
BC-0302409457|k141_32068.6	MK584838	53.19	Orthornavirae	Lenarviricota	Miaviricetes	Ourlivirales	Botourmiaviridae	Magoulivirus	Cladosporium magoulivirus 1	2843961	ssRNA(+)	fungi	Fungi
BC-0302409457|k141_33314.5	Y13463	48.49	Orthornavirae	Kitrinoviricota	Tolucaviricetes	Tolivirales	Tombusviridae	Gallantivirus	Galinsoga mosaic virus	60714	ssRNA(+)	plants	Plants
BC-0302409457|k141_3345.6	MN908947	100	Orthornavirae	Pisuviricota	Pisoniviricetes	Nidovirales	Coronaviridae	Betacoronavirus	Severe acute respiratory syndrome-related coronavirus	694009	ssRNA(+)	vertebrates	Vertebrates	human
BC-0302409457|k141_35675.4	DQ355023	96.1	Orthornavirae	Kitrinoviricota	Alsuviricetes	Martellivirales	Virgaviridae	Tobamovirus	Bell pepper mottle virus	368735	ssRNA(+)	plants	Plants
BC-0302409457|k141_41746.4	U22521	29.85	Orthornavirae	Pisuviricota	Pisoniviricetes	Picornavirales	Picornaviridae	Enterovirus	Enterovirus A	138948	ssRNA(+)	vertebrates	Vertebrates	human
BC-0302409457|k141_4814.4	MN605481	29.45	Orthornavirae	Lenarviricota	Miaviricetes	Ourlivirales	Botourmiaviridae	Botoulivirus	Botoulivirus zetabotrytidis	2955529	ssRNA(+)	fungi	Fungi
BC-0302409457|k141_53043.3	V01408	99.35	Orthornavirae	Kitrinoviricota	Alsuviricetes	Martellivirales	Virgaviridae	Tobamovirus	Tobacco mosaic virus	12242	ssRNA(+)	plants	Plants
BC-0302409457|k141_62423.6	KT598226	33.33	Orthornavirae	Kitrinoviricota	Alsuviricetes	Tymovirales	Deltaflexiviridae	Deltaflexivirus	Soybean-associated deltaflexivirus 1	2169866	ssRNA(+)	plants	Plants
BC-0302409457|k141_65182.6	KT598226	53.24	Orthornavirae	Kitrinoviricota	Alsuviricetes	Tymovirales	Deltaflexiviridae	Deltaflexivirus	Soybean-associated deltaflexivirus 1	2169866	ssRNA(+)	plants	Plants
BC-0302409457|k141_68237.1	KX977569	23.42	Orthornavirae	Kitrinoviricota	Alsuviricetes	Martellivirales	Endornaviridae	Alphaendornavirus	Bell pepper alphaendornavirus	354328	ssRNA(+)	plants	Plants
BC-0302409457|k141_75535.5	KT598226	31.03	Orthornavirae	Kitrinoviricota	Alsuviricetes	Tymovirales	Deltaflexiviridae	Deltaflexivirus	Soybean-associated deltaflexivirus 1	2169866	ssRNA(+)	plants	Plants
BC-0302409457|k141_80797.1	AJ295948	29.14	Orthornavirae	Kitrinoviricota	Alsuviricetes	Martellivirales	Virgaviridae	Tobamovirus	Kyuri green mottle mosaic virus	111970	ssRNA(+)	plants	Plants
BC-0302409459|k141_26604.1	KF412901	31.95	Orthornavirae	Pisuviricota	Pisoniviricetes	Picornavirales	Marnaviridae	Locarnavirus	Sanfarnavirus 2	2560739	ssRNA(+)	marine (S)	Others
BC-0302409459|k141_49096.2	KX884002	30.26	Orthornavirae	Negarnaviricota	Chunqiuviricetes	Muvirales	Qinviridae	Yingvirus	Yingvirus wenzhouense	2507503	ssRNA(-)	invertebrates	Invertebrates
BC-0302409459|k141_49584.2	FR687854	70.8	Orthornavirae	Pisuviricota	Duplopiviricetes	Durnavirales	Partitiviridae	Deltapartitivirus	Fig cryptic virus	882768	dsRNA	plants	Plants
BC-0302409459|k141_5048.4	EU770623	40.22	Orthornavirae	Lenarviricota	Miaviricetes	Ourlivirales	Botourmiaviridae	Ourmiavirus	Ourmia melon virus	186786	ssRNA(+)	plants	Plants
BC-0302409459|k141_54148.1	JN117276	69.75	Orthornavirae	Pisuviricota	Duplopiviricetes	Durnavirales	Partitiviridae	Deltapartitivirus	Pepper cryptic virus 1	369643	dsRNA	plants	Plants
BC-0302409575|k141_3786.1	MG721540	64.29	Orthornavirae	Lenarviricota	Howeltoviricetes	Cryppavirales	Mitoviridae	Duamitovirus	Duamitovirus bevu1	2955768	ssRNA(+)	plants	Plants
BC-0302409575|k141_48.5	M22445	35.15	Orthornavirae	Kitrinoviricota	Tolucaviricetes	Tolivirales	Tombusviridae	Betacarmovirus	Turnip crinkle virus	11988	ssRNA(+)	plants	Plants
BC-0302410057|k141_11092.5	MN532602	66.97	Orthornavirae	Lenarviricota	Miaviricetes	Ourlivirales	Botourmiaviridae	Magoulivirus	Magoulivirus lambdaplasmoparae	2956164	ssRNA(+)	other (specify)	Others
BC-0302410057|k141_11395.1	MN532616	58.26	Orthornavirae	Lenarviricota	Miaviricetes	Ourlivirales	Botourmiaviridae	Magoulivirus	Magoulivirus omegaplasmoparae	2956168	ssRNA(+)	other (specify)	Others
BC-0302410057|k141_12296.2	JF716350	48.11	Orthornavirae					Botybirnavirus	Botrytis porri botybirnavirus 1	1918014	dsRNA	fungi	Fungi
BC-0302410057|k141_12806.4	JN700748	41.72	Orthornavirae	Kitrinoviricota	Tolucaviricetes	Tolivirales	Tombusviridae	Tombusvirus	Moroccan pepper virus	208086	ssRNA(+)	plants	Plants
BC-0302410057|k141_13211.6	M22445	33.68	Orthornavirae	Kitrinoviricota	Tolucaviricetes	Tolivirales	Tombusviridae	Betacarmovirus	Turnip crinkle virus	11988	ssRNA(+)	plants	Plants
BC-0302410057|k141_16754.5	BK010429	44.34	Orthornavirae	Lenarviricota	Howeltoviricetes	Cryppavirales	Mitoviridae	Duamitovirus	Duamitovirus dapi1	2955778	ssRNA(+)	plants	Plants
BC-0302410057|k141_18800.3	AJ295949	28	Orthornavirae	Kitrinoviricota	Alsuviricetes	Martellivirales	Virgaviridae	Tobamovirus	Zucchini green mottle mosaic virus	111418	ssRNA(+)	plants	Plants
BC-0302410057|k141_19339.4	MN532632	63.36	Orthornavirae	Lenarviricota	Miaviricetes	Ourlivirales	Botourmiaviridae	Epsilonscleroulivirus	Epsilonscleroulivirus plasmoparae	2955871	ssRNA(+)	other (specify)	Others
BC-0302410057|k141_19343.1	MN532614	30.25	Orthornavirae	Lenarviricota	Miaviricetes	Ourlivirales	Botourmiaviridae	Magoulivirus	Magoulivirus psiplasmoparae	2956171	ssRNA(+)	other (specify)	Others
BC-0302410057|k141_19432.3	MK584831	32.95	Orthornavirae	Lenarviricota	Howeltoviricetes	Cryppavirales	Mitoviridae	Duamitovirus	Duamitovirus nepa1	2955791	ssRNA(+)	fungi	Fungi
BC-0302410057|k141_23513.5	KX015962	34.51	Orthornavirae	Kitrinoviricota	Alsuviricetes	Tymovirales	Deltaflexiviridae	Deltaflexivirus	Fusarium deltaflexivirus 1	2169864	ssRNA(+)	fungi	Fungi
BC-0302410057|k141_26548.4	U22521	28.36	Orthornavirae	Pisuviricota	Pisoniviricetes	Picornavirales	Picornaviridae	Enterovirus	Enterovirus A	138948	ssRNA(+)	vertebrates	Vertebrates	human
BC-0302410057|k141_27187.5	MN532613	62.63	Orthornavirae	Lenarviricota	Miaviricetes	Ourlivirales	Botourmiaviridae	Magoulivirus	Magoulivirus jiplasmoparae	2956162	ssRNA(+)	other (specify)	Others
BC-0302410057|k141_28987.3	MN532616	58.72	Orthornavirae	Lenarviricota	Miaviricetes	Ourlivirales	Botourmiaviridae	Magoulivirus	Magoulivirus omegaplasmoparae	2956168	ssRNA(+)	other (specify)	Others
BC-0302410057|k141_30914.4	MN605476	82.69	Orthornavirae	Lenarviricota	Miaviricetes	Ourlivirales	Botourmiaviridae	Betascleroulivirus	Betascleroulivirus botrytidis	2955479	ssRNA(+)	fungi	Fungi
BC-0302410057|k141_33106.3	MN532604	57.26	Orthornavirae	Lenarviricota	Miaviricetes	Ourlivirales	Botourmiaviridae	Magoulivirus	Magoulivirus niplasmoparae	2956167	ssRNA(+)	other (specify)	Others
BC-0302410057|k141_33909.2	U90136	33.12	Orthornavirae	Lenarviricota	Amabiliviricetes	Wolframvirales	Narnaviridae	Narnavirus	Saccharomyces 23S RNA narnavirus	198599	ssRNA(+)	fungi	Fungi
BC-0302410057|k141_33954.6	J04692	55.83	Orthornavirae	Duplornaviricota	Chrymotiviricetes	Ghabrivirales	Totiviridae	Totivirus	Saccharomyces cerevisiae virus L-A	11008	dsRNA	fungi	Fungi
BC-0302410057|k141_35096.2	MN532604	60.19	Orthornavirae	Lenarviricota	Miaviricetes	Ourlivirales	Botourmiaviridae	Magoulivirus	Magoulivirus niplasmoparae	2956167	ssRNA(+)	other (specify)	Others
BC-0302410057|k141_37727.3	JN620802	46.58	Orthornavirae	Pisuviricota	Pisoniviricetes	Sobelivirales	Solemoviridae	Sobemovirus	Artemisia virus A	1133751	ssRNA(+)	plants	Plants
BC-0302410057|k141_3815.5	MN532656	60.31	Orthornavirae	Lenarviricota	Miaviricetes	Ourlivirales	Botourmiaviridae	Scleroulivirus	Scleroulivirus thetaplasmoparae	2956421	ssRNA(+)	other (specify)	Others
BC-0302410057|k141_40078.2	KX015962	36.56	Orthornavirae	Kitrinoviricota	Alsuviricetes	Tymovirales	Deltaflexiviridae	Deltaflexivirus	Fusarium deltaflexivirus 1	2169864	ssRNA(+)	fungi	Fungi
BC-0302410057|k141_40432.4	KR106177	25.41	Orthornavirae	Negarnaviricota	Ellioviricetes	Bunyavirales	Phenuiviridae	Phlebovirus	Corfou phlebovirus	2844015	ssRNA(-)	invertebrates	Invertebrates
BC-0302410057|k141_42088.1	U22521	29.85	Orthornavirae	Pisuviricota	Pisoniviricetes	Picornavirales	Picornaviridae	Enterovirus	Enterovirus A	138948	ssRNA(+)	vertebrates	Vertebrates	human
BC-0302410057|k141_4311.1	LC413501	61.4	Orthornavirae	Lenarviricota	Miaviricetes	Ourlivirales	Botourmiaviridae	Penoulivirus	Pyricularia penoulivirus	2846014	ssRNA(+)	fungi	Fungi
BC-0302410057|k141_43304.2	LC195294	72.22	Orthornavirae	Pisuviricota	Duplopiviricetes	Durnavirales	Partitiviridae	Deltapartitivirus	Pepper cryptic virus 2	1050903	dsRNA	plants	Plants
BC-0302410057|k141_43455.1	KT598226	34.56	Orthornavirae	Kitrinoviricota	Alsuviricetes	Tymovirales	Deltaflexiviridae	Deltaflexivirus	Soybean-associated deltaflexivirus 1	2169866	ssRNA(+)	plants	Plants
BC-0302410057|k141_49044.4	LC195294	50.46	Orthornavirae	Pisuviricota	Duplopiviricetes	Durnavirales	Partitiviridae	Deltapartitivirus	Pepper cryptic virus 2	1050903	dsRNA	plants	Plants
BC-0302410057|k141_49093.6	MN532604	65.77	Orthornavirae	Lenarviricota	Miaviricetes	Ourlivirales	Botourmiaviridae	Magoulivirus	Magoulivirus niplasmoparae	2956167	ssRNA(+)	other (specify)	Others
BC-0302410057|k141_49131.1	BK013438	41.83	Orthornavirae	Lenarviricota	Leviviricetes	Timlovirales	Steitzviridae	Stehnavirus	Stehnavirus chorovicinum	2846386	ssRNA(+)	bacteria	Bacteria
BC-0302410057|k141_49182.6	HQ677625	38.18	Orthornavirae	Kitrinoviricota	Tolucaviricetes	Tolivirales	Tombusviridae	Alphacarmovirus	Honeysuckle ringspot virus	943272	ssRNA(+)	plants	Plants
BC-0302410057|k141_49937.3	BK010736	35.9	Orthornavirae	Lenarviricota	Howeltoviricetes	Cryppavirales	Mitoviridae	Unuamitovirus	Unuamitovirus enmu8	2956600	ssRNA(+)	fungi	Fungi
BC-0302410057|k141_50357.4	MN532612	73.15	Orthornavirae	Lenarviricota	Miaviricetes	Ourlivirales	Botourmiaviridae	Magoulivirus	Magoulivirus fiplasmoparae	2956158	ssRNA(+)	other (specify)	Others
BC-0302410057|k141_54189.1	KX280012	32.84	Orthornavirae	Negarnaviricota	Ellioviricetes	Bunyavirales	Leishbuviridae	Shilevirus	Shilevirus leptomonadis	2560552	ssRNA(-)	protozoa	Others
BC-0302410057|k141_55679.4	JX197071	37.5	Orthornavirae	Kitrinoviricota	Tolucaviricetes	Tolivirales	Tombusviridae	Tombusvirus	Moroccan pepper virus	208086	ssRNA(+)	plants	Plants
BC-0302410057|k141_59460.5	L16015	39.6	Orthornavirae	Kitrinoviricota	Tolucaviricetes	Tolivirales	Tombusviridae	Betacarmovirus	Cardamine chlorotic fleck virus	31711	ssRNA(+)	plants	Plants
BC-0302410057|k141_59914.5	MK584842	64.35	Orthornavirae	Lenarviricota	Miaviricetes	Ourlivirales	Botourmiaviridae	Botoulivirus	Epicoccum botoulivirus	2844155	ssRNA(+)	fungi	Fungi
BC-0302410057|k141_60265.3	AY100482	34.94	Orthornavirae	Kitrinoviricota	Tolucaviricetes	Tolivirales	Tombusviridae	Tombusvirus	Eggplant mottled crinkle virus	270256	ssRNA(+)	plants	Plants
BC-0302410057|k141_64463.4	AF278535	90.18	Orthornavirae	Kitrinoviricota	Alsuviricetes	Martellivirales	Bromoviridae	Ilarvirus	Prunus necrotic ringspot virus	37733	ssRNA(+)	plants	Plants
BC-0302410057|k141_6498.4	MH206615	32.24	Orthornavirae	Kitrinoviricota	Alsuviricetes	Martellivirales	Closteroviridae	Ampelovirus	Air potato ampelovirus 1	2560290	ssRNA(+)	plants	Plants
BC-0302410057|k141_66609.5	BK010429	52.81	Orthornavirae	Lenarviricota	Howeltoviricetes	Cryppavirales	Mitoviridae	Duamitovirus	Duamitovirus dapi1	2955778	ssRNA(+)	plants	Plants
BC-0302410057|k141_68029.3	MF440375	81.92	Orthornavirae	Kitrinoviricota	Alsuviricetes	Tymovirales	Betaflexiviridae	Prunevirus	Actinidia seed borne latent virus	2560282	ssRNA(+)	plants	Plants
BC-0302410057|k141_68033.3	MN532611	70.08	Orthornavirae	Lenarviricota	Miaviricetes	Ourlivirales	Botourmiaviridae	Magoulivirus	Magoulivirus ipsilonplasmoparae	2956161	ssRNA(+)	other (specify)	Others
BC-0302410057|k141_73204.1	KT598226	34.33	Orthornavirae	Kitrinoviricota	Alsuviricetes	Tymovirales	Deltaflexiviridae	Deltaflexivirus	Soybean-associated deltaflexivirus 1	2169866	ssRNA(+)	plants	Plants
BC-0302410057|k141_73716.3	KT921181	33.09	Orthornavirae	Lenarviricota	Howeltoviricetes	Cryppavirales	Mitoviridae	Unuamitovirus	Unuamitovirus crri3	2956589	ssRNA(+)	fungi	Fungi
BC-0302410057|k141_74501.6	AF452884	45.78	Orthornavirae	Kitrinoviricota	Tolucaviricetes	Tolivirales	Tombusviridae	Betanecrovirus	Beet black scorch virus	196375	ssRNA(+)	plants	Plants
BC-0302410057|k141_75158.1	AF525933	34.07	Orthornavirae	Negarnaviricota	Milneviricetes	Serpentovirales	Aspiviridae	Ophiovirus	Ophiovirus mirafioriense	2170048	ssRNA(-)	plants	Plants
BC-0302410057|k141_75470.5	MN532638	62.1	Orthornavirae	Lenarviricota	Miaviricetes	Ourlivirales	Botourmiaviridae	Betascleroulivirus	Betascleroulivirus lambdaplasmoparae	2955486	ssRNA(+)	other (specify)	Others
BC-0302410057|k141_8892.4	U67839	36.72	Orthornavirae	Pisuviricota	Pisoniviricetes	Picornavirales	Secoviridae	Waikavirus	Maize chlorotic dwarf virus	51354	ssRNA(+)	plants	Plants
BC-0302410119|k141_111849.2	AB110977	47.83	Orthornavirae	Lenarviricota	Howeltoviricetes	Cryppavirales	Mitoviridae	Unuamitovirus	Unuamitovirus hemo1	2956613	ssRNA(+)	fungi	Fungi
BC-0302410119|k141_114189.5	LC195294	42.39	Orthornavirae	Pisuviricota	Duplopiviricetes	Durnavirales	Partitiviridae	Deltapartitivirus	Pepper cryptic virus 2	1050903	dsRNA	plants	Plants
BC-0302410119|k141_118561.1	MK372894	40.99	Orthornavirae	Lenarviricota	Howeltoviricetes	Cryppavirales	Mitoviridae	Duamitovirus	Duamitovirus rhso25	2955803	ssRNA(+)	fungi	Fungi
BC-0302410119|k141_121457.1	MG721540	64.29	Orthornavirae	Lenarviricota	Howeltoviricetes	Cryppavirales	Mitoviridae	Duamitovirus	Duamitovirus bevu1	2955768	ssRNA(+)	plants	Plants
BC-0302410119|k141_121691.2	J04692	55.28	Orthornavirae	Duplornaviricota	Chrymotiviricetes	Ghabrivirales	Totiviridae	Totivirus	Saccharomyces cerevisiae virus L-A	11008	dsRNA	fungi	Fungi
BC-0302410119|k141_23391.2	BK010429	44.83	Orthornavirae	Lenarviricota	Howeltoviricetes	Cryppavirales	Mitoviridae	Duamitovirus	Duamitovirus dapi1	2955778	ssRNA(+)	plants	Plants
BC-0302410119|k141_24042.2	BK013438	41.83	Orthornavirae	Lenarviricota	Leviviricetes	Timlovirales	Steitzviridae	Stehnavirus	Stehnavirus chorovicinum	2846386	ssRNA(+)	bacteria	Bacteria
BC-0302410119|k141_24229.6	MG256173	48.65	Orthornavirae	Lenarviricota	Howeltoviricetes	Cryppavirales	Mitoviridae	Duamitovirus	Duamitovirus gima1	2955783	ssRNA(+)	fungi	Fungi
BC-0302410119|k141_41225.5	BK010429	57.14	Orthornavirae	Lenarviricota	Howeltoviricetes	Cryppavirales	Mitoviridae	Duamitovirus	Duamitovirus dapi1	2955778	ssRNA(+)	plants	Plants
BC-0302410119|k141_43027.5	BK010429	44.25	Orthornavirae	Lenarviricota	Howeltoviricetes	Cryppavirales	Mitoviridae	Duamitovirus	Duamitovirus dapi1	2955778	ssRNA(+)	plants	Plants
BC-0302410119|k141_57766.1	BK010429	56.99	Orthornavirae	Lenarviricota	Howeltoviricetes	Cryppavirales	Mitoviridae	Duamitovirus	Duamitovirus dapi1	2955778	ssRNA(+)	plants	Plants
BC-0302410119|k141_57845.3	MN532632	53.92	Orthornavirae	Lenarviricota	Miaviricetes	Ourlivirales	Botourmiaviridae	Epsilonscleroulivirus	Epsilonscleroulivirus plasmoparae	2955871	ssRNA(+)	other (specify)	Others
BC-0302410119|k141_60498.5	BK010429	54.31	Orthornavirae	Lenarviricota	Howeltoviricetes	Cryppavirales	Mitoviridae	Duamitovirus	Duamitovirus dapi1	2955778	ssRNA(+)	plants	Plants
BC-0302410119|k141_72987.3	MG721540	62.5	Orthornavirae	Lenarviricota	Howeltoviricetes	Cryppavirales	Mitoviridae	Duamitovirus	Duamitovirus bevu1	2955768	ssRNA(+)	plants	Plants
BC-0302410119|k141_75383.2	MG256173	47.37	Orthornavirae	Lenarviricota	Howeltoviricetes	Cryppavirales	Mitoviridae	Duamitovirus	Duamitovirus gima1	2955783	ssRNA(+)	fungi	Fungi
BC-0302410119|k141_88828.6	M22445	33.42	Orthornavirae	Kitrinoviricota	Tolucaviricetes	Tolivirales	Tombusviridae	Betacarmovirus	Turnip crinkle virus	11988	ssRNA(+)	plants	Plants
BC-0302410205|k141_3305.2	MN473199	92.98	Orthornavirae	Lenarviricota	Miaviricetes	Ourlivirales	Botourmiaviridae	Penoulivirus	Phoma penoulivirus	2845834	ssRNA(+)	fungi	Fungi
BC-0302410205|k141_3836.5	JF729471	27.35	Orthornavirae	Kitrinoviricota	Alsuviricetes	Martellivirales	Virgaviridae	Tobamovirus	Rattail cactus necrosis-associated virus	1123754	ssRNA(+)	plants	Plants
BC-0302410205|k141_4808.6	LC413502	57.48	Orthornavirae	Lenarviricota	Miaviricetes	Ourlivirales	Botourmiaviridae	Betascleroulivirus	Betascleroulivirus pyriculariae	2846015	ssRNA(+)	fungi	Fungi
BC-0302410212|k141_13694.5	KT581451	33.33	Orthornavirae	Kitrinoviricota	Alsuviricetes	Tymovirales	Deltaflexiviridae	Deltaflexivirus	Sclerotinia deltaflexivirus 1	2169865	ssRNA(+)	fungi	Fungi
BC-0302410212|k141_5030.3	KC610514	60.33	Orthornavirae	Duplornaviricota	Chrymotiviricetes	Ghabrivirales	Totiviridae	Totivirus	Scheffersomyces segobiensis virus L	1300323	dsRNA	fungi	Fungi
BC-0302410212|k141_7337.5	MG721540	61.95	Orthornavirae	Lenarviricota	Howeltoviricetes	Cryppavirales	Mitoviridae	Duamitovirus	Duamitovirus bevu1	2955768	ssRNA(+)	plants	Plants
BC-0302410476|k141_15798.3	V01408	99.35	Orthornavirae	Kitrinoviricota	Alsuviricetes	Martellivirales	Virgaviridae	Tobamovirus	Tobacco mosaic virus	12242	ssRNA(+)	plants	Plants
BC-0302410476|k141_17258.5	MN295969	58.93	Orthornavirae	Pisuviricota	Duplopiviricetes	Durnavirales	Hypoviridae	Alphahypovirus	Alphahypovirus sacchari	2955289	ssRNA	fungi	Fungi
BC-0302410476|k141_21674.2	KT581451	34.69	Orthornavirae	Kitrinoviricota	Alsuviricetes	Tymovirales	Deltaflexiviridae	Deltaflexivirus	Sclerotinia deltaflexivirus 1	2169865	ssRNA(+)	fungi	Fungi
BC-0302410476|k141_29779.6	MN557004	62.5	Orthornavirae	Negarnaviricota	Monjiviricetes	Mononegavirales	Mymonaviridae	Plasmopamonavirus	Plasmopamonavirus plasmoparae	2845860	ssRNA(-)	protist	Others
BC-0302410476|k141_35023.2	MN532645	74.79	Orthornavirae	Lenarviricota	Miaviricetes	Ourlivirales	Botourmiaviridae	Botoulivirus	Botoulivirus deltaplasmoparae	2955521	ssRNA(+)	other (specify)	Others
BC-0302410476|k141_35479.4	MN532631	62.93	Orthornavirae	Lenarviricota	Miaviricetes	Ourlivirales	Botourmiaviridae	Scleroulivirus	Scleroulivirus alphaplasmoparae	2956405	ssRNA(+)	other (specify)	Others
BC-0302410476|k141_35812.5	HQ343295	62.62	Orthornavirae	Duplornaviricota	Chrymotiviricetes	Ghabrivirales	Chrysoviridae	Betachrysovirus	Betachrysovirus fugramineari	2560478	dsRNA	fungi	Fungi
BC-0302410476|k141_38439.5	AY616760	35.98	Orthornavirae	Kitrinoviricota	Tolucaviricetes	Tolivirales	Tombusviridae	Alphanecrovirus	Olive mild mosaic virus	295090	ssRNA(+)	plants	Plants
BC-0302410476|k141_4055.6	KT598226	36.57	Orthornavirae	Kitrinoviricota	Alsuviricetes	Tymovirales	Deltaflexiviridae	Deltaflexivirus	Soybean-associated deltaflexivirus 1	2169866	ssRNA(+)	plants	Plants
BC-0302410476|k141_42518.1	MN473199	65.96	Orthornavirae	Lenarviricota	Miaviricetes	Ourlivirales	Botourmiaviridae	Penoulivirus	Phoma penoulivirus	2845834	ssRNA(+)	fungi	Fungi
BC-0302410476|k141_42518.2	MN715322	66.13	Orthornavirae	Lenarviricota	Miaviricetes	Ourlivirales	Botourmiaviridae	Penoulivirus	Sclerotinia penoulivirus	2846164	ssRNA(+)	fungi	Fungi
BC-0302410476|k141_8332.2	AB569997	64.03	Orthornavirae	Pisuviricota	Duplopiviricetes	Durnavirales	Partitiviridae	Alphapartitivirus	Rosellinia necatrix partitivirus 2	859651	dsRNA	fungi	Fungi
BC-0302410490|k141_119196.1	FR687854	70.8	Orthornavirae	Pisuviricota	Duplopiviricetes	Durnavirales	Partitiviridae	Deltapartitivirus	Fig cryptic virus	882768	dsRNA	plants	Plants
BC-0302410490|k141_1471.4	M81413	100	Orthornavirae	Kitrinoviricota	Alsuviricetes	Martellivirales	Virgaviridae	Tobamovirus	Pepper mild mottle virus	12239	ssRNA(+)	plants	Plants	human
BC-0302410490|k141_27866.2	AY881628	26.63	Orthornavirae	Kitrinoviricota	Alsuviricetes	Martellivirales	Closteroviridae	Closterovirus	Grapevine leafroll-associated virus 2	64003	ssRNA(+)	plants	Plants
BC-0302410490|k141_38175.3	MN532662	97.44	Orthornavirae	Lenarviricota	Miaviricetes	Ourlivirales	Botourmiaviridae	Scleroulivirus	Scleroulivirus xiplasmoparae	2956422	ssRNA(+)	other (specify)	Others
BC-0302410490|k141_43578.1	V01408	100	Orthornavirae	Kitrinoviricota	Alsuviricetes	Martellivirales	Virgaviridae	Tobamovirus	Tobacco mosaic virus	12242	ssRNA(+)	plants	Plants
BC-0302410490|k141_49259.3	M20162	33.33	Orthornavirae	Kitrinoviricota	Alsuviricetes	Martellivirales	Togaviridae	Alphavirus	Ross River virus	11029	ssRNA(+)	invertebrates	Invertebrates	human
BC-0302410490|k141_56509.3	X02986	30.3	Orthornavirae	Kitrinoviricota	Tolucaviricetes	Tolivirales	Tombusviridae	Alphacarmovirus	Carnation mottle virus	11986	ssRNA(+)	plants	Plants
BC-0302410490|k141_84531.3	KX884002	30.26	Orthornavirae	Negarnaviricota	Chunqiuviricetes	Muvirales	Qinviridae	Yingvirus	Yingvirus wenzhouense	2507503	ssRNA(-)	invertebrates	Invertebrates
BC-0302410490|k141_90674.3	JN117276	69.75	Orthornavirae	Pisuviricota	Duplopiviricetes	Durnavirales	Partitiviridae	Deltapartitivirus	Pepper cryptic virus 1	369643	dsRNA	plants	Plants
BC-0302410490|k141_9415.4	MN532609	68.87	Orthornavirae	Lenarviricota	Miaviricetes	Ourlivirales	Botourmiaviridae	Magoulivirus	Magoulivirus sigmaplasmoparae	2956173	ssRNA(+)	other (specify)	Others
BC-0302410490|k141_96245.1	MN473199	73.64	Orthornavirae	Lenarviricota	Miaviricetes	Ourlivirales	Botourmiaviridae	Penoulivirus	Phoma penoulivirus	2845834	ssRNA(+)	fungi	Fungi
BC-0302410517|k141_119528.4	MG721540	64.71	Orthornavirae	Lenarviricota	Howeltoviricetes	Cryppavirales	Mitoviridae	Duamitovirus	Duamitovirus bevu1	2955768	ssRNA(+)	plants	Plants
BC-0302410517|k141_123384.4	AB569997	63.54	Orthornavirae	Pisuviricota	Duplopiviricetes	Durnavirales	Partitiviridae	Alphapartitivirus	Rosellinia necatrix partitivirus 2	859651	dsRNA	fungi	Fungi
BC-0302410517|k141_147723.2	DQ143874	53.44	Orthornavirae	Pisuviricota	Pisoniviricetes	Picornavirales	Secoviridae	Cheravirus	Stocky prune virus	340196	ssRNA(+)	plants	Plants
BC-0302410517|k141_230.2	MG721540	61.95	Orthornavirae	Lenarviricota	Howeltoviricetes	Cryppavirales	Mitoviridae	Duamitovirus	Duamitovirus bevu1	2955768	ssRNA(+)	plants	Plants
BC-0302410517|k141_3808.6	AB569997	54.4	Orthornavirae	Pisuviricota	Duplopiviricetes	Durnavirales	Partitiviridae	Alphapartitivirus	Rosellinia necatrix partitivirus 2	859651	dsRNA	fungi	Fungi
BC-0302410517|k141_78388.3	AJ295948	27.86	Orthornavirae	Kitrinoviricota	Alsuviricetes	Martellivirales	Virgaviridae	Tobamovirus	Kyuri green mottle mosaic virus	111970	ssRNA(+)	plants	Plants
BC-0302410523|k141_2290.4	MN532658	67.83	Orthornavirae	Lenarviricota	Miaviricetes	Ourlivirales	Botourmiaviridae	Scleroulivirus	Scleroulivirus kappaplasmoparae	2956412	ssRNA(+)	other (specify)	Others
BC-0302410523|k141_8000.2	MN532632	61.9	Orthornavirae	Lenarviricota	Miaviricetes	Ourlivirales	Botourmiaviridae	Epsilonscleroulivirus	Epsilonscleroulivirus plasmoparae	2955871	ssRNA(+)	other (specify)	Others
BC-0302410523|k141_9290.3	MN532632	60.53	Orthornavirae	Lenarviricota	Miaviricetes	Ourlivirales	Botourmiaviridae	Epsilonscleroulivirus	Epsilonscleroulivirus plasmoparae	2955871	ssRNA(+)	other (specify)	Others
BC-0302410532|k141_10493.6	U20976	42.72	Orthornavirae	Kitrinoviricota	Tolucaviricetes	Tolivirales	Tombusviridae	Gammacarmovirus	Cowpea mottle virus	12627	ssRNA(+)	plants	Plants
BC-0302410532|k141_18730.3	V01408	100	Orthornavirae	Kitrinoviricota	Alsuviricetes	Martellivirales	Virgaviridae	Tobamovirus	Tobacco mosaic virus	12242	ssRNA(+)	plants	Plants
BC-0302410532|k141_2419.1	M81413	99.35	Orthornavirae	Kitrinoviricota	Alsuviricetes	Martellivirales	Virgaviridae	Tobamovirus	Pepper mild mottle virus	12239	ssRNA(+)	plants	Plants	human
BC-0302410747|k141_106499.1	MN532638	77.32	Orthornavirae	Lenarviricota	Miaviricetes	Ourlivirales	Botourmiaviridae	Betascleroulivirus	Betascleroulivirus lambdaplasmoparae	2955486	ssRNA(+)	other (specify)	Others
BC-0302410747|k141_14347.1	JN117276	69.75	Orthornavirae	Pisuviricota	Duplopiviricetes	Durnavirales	Partitiviridae	Deltapartitivirus	Pepper cryptic virus 1	369643	dsRNA	plants	Plants
BC-0302410747|k141_15429.6	MN625832	83.64	Orthornavirae	Duplornaviricota	Chrymotiviricetes	Ghabrivirales	Chrysoviridae	Alphachrysovirus	Alphachrysovirus chrysothricis	2955242	dsRNA	fungi	Fungi
BC-0302410747|k141_18580.3	KC921392	47.27	Orthornavirae	Pisuviricota	Pisoniviricetes	Sobelivirales	Solemoviridae	Polerovirus	Maize yellow dwarf virus RMV	2170101	ssRNA(+)	plants	Plants
BC-0302410747|k141_19411.1	JN620802	41.07	Orthornavirae	Pisuviricota	Pisoniviricetes	Sobelivirales	Solemoviridae	Sobemovirus	Artemisia virus A	1133751	ssRNA(+)	plants	Plants
BC-0302410747|k141_19766.4	X76931	98.59	Orthornavirae	Pisuviricota	Pisoniviricetes	Sobelivirales	Solemoviridae	Polerovirus	Cucurbit aphid-borne yellows virus	91753	ssRNA(+)	plants	Plants
BC-0302410747|k141_27714.1	LC144945	70	Orthornavirae	Kitrinoviricota	Alsuviricetes	Martellivirales	Endornaviridae	Alphaendornavirus	Winged bean alphaendornavirus 1	2169693	ssRNA(+)	plants	Plants
BC-0302410747|k141_28089.4	HQ871931	31.65	Orthornavirae	Kitrinoviricota	Magsaviricetes	Nodamuvirales	Sinhaliviridae	Sinaivirus	Lake Sinai virus 1	1041806	ssRNA(+)	invertebrates	Invertebrates
BC-0302410747|k141_347.5	GU182408	23.91	Orthornavirae	Pisuviricota	Pisoniviricetes	Picornavirales	Picornaviridae	Oscivirus	Oscivirus A	1511781	ssRNA(+)	vertebrates	Vertebrates	non_mammalia_vertebrates
BC-0302410747|k141_37591.5	KT598226	78.3	Orthornavirae	Kitrinoviricota	Alsuviricetes	Tymovirales	Deltaflexiviridae	Deltaflexivirus	Soybean-associated deltaflexivirus 1	2169866	ssRNA(+)	plants	Plants
BC-0302410747|k141_38613.2	X83964	53.33	Orthornavirae	Kitrinoviricota	Tolucaviricetes	Tolivirales	Tombusviridae	Avenavirus	Oat chlorotic stunt virus	146762	ssRNA	plants	Plants
BC-0302410747|k141_42322.1	MN532638	76.29	Orthornavirae	Lenarviricota	Miaviricetes	Ourlivirales	Botourmiaviridae	Betascleroulivirus	Betascleroulivirus lambdaplasmoparae	2955486	ssRNA(+)	other (specify)	Others
BC-0302410747|k141_42336.4	HQ389540	30.73	Orthornavirae	Kitrinoviricota	Alsuviricetes	Martellivirales	Virgaviridae	Tobamovirus	Passion fruit mosaic virus	1032457	ssRNA(+)	plants	Plants
BC-0302410747|k141_48135.1	BK013560	67.72	Orthornavirae	Lenarviricota	Leviviricetes	Timlovirales	Steitzviridae	Gredihovirus	Gredihovirus neotellurenecus	2844749	ssRNA(+)	bacteria	Bacteria
BC-0302410747|k141_50182.4	KX159470	53.09	Orthornavirae	Kitrinoviricota	Tolucaviricetes	Tolivirales	Tombusviridae	Luteovirus	Cherry associated luteovirus	1912598	ssRNA(+)	plants	Plants
BC-0302410747|k141_61692.5	AY616760	45.73	Orthornavirae	Kitrinoviricota	Tolucaviricetes	Tolivirales	Tombusviridae	Alphanecrovirus	Olive mild mosaic virus	295090	ssRNA(+)	plants	Plants
BC-0302410747|k141_63007.6	AF195000	33.33	Orthornavirae	Kitrinoviricota	Alsuviricetes	Tymovirales	Tymoviridae	Tymovirus	Chayote mosaic virus	71030	ssRNA(+)	plants	Plants
BC-0302410747|k141_66255.2	V01408	100	Orthornavirae	Kitrinoviricota	Alsuviricetes	Martellivirales	Virgaviridae	Tobamovirus	Tobacco mosaic virus	12242	ssRNA(+)	plants	Plants
BC-0302410747|k141_69440.5	U22521	29.85	Orthornavirae	Pisuviricota	Pisoniviricetes	Picornavirales	Picornaviridae	Enterovirus	Enterovirus A	138948	ssRNA(+)	vertebrates	Vertebrates	human
BC-0302410747|k141_7437.5	MN386962	37.66	Orthornavirae	Lenarviricota	Miaviricetes	Ourlivirales	Botourmiaviridae	Penoulivirus	Penoulivirus malus	2956295	ssRNA(+)	plants	Plants
BC-0302410747|k141_77562.3	AJ295949	27.14	Orthornavirae	Kitrinoviricota	Alsuviricetes	Martellivirales	Virgaviridae	Tobamovirus	Zucchini green mottle mosaic virus	111418	ssRNA(+)	plants	Plants
BC-0302410747|k141_79795.4	AJ557804	57.76	Orthornavirae	Kitrinoviricota	Tolucaviricetes	Tolivirales	Tombusviridae	Aureusvirus	Johnsongrass chlorotic stripe mosaic virus	229149	ssRNA(+)	plants	Plants
BC-0302410747|k141_81155.3	X83964	53.94	Orthornavirae	Kitrinoviricota	Tolucaviricetes	Tolivirales	Tombusviridae	Avenavirus	Oat chlorotic stunt virus	146762	ssRNA	plants	Plants
BC-0302410747|k141_86332.1	KP901095	45.24	Orthornavirae	Kitrinoviricota	Tolucaviricetes	Tolivirales	Tombusviridae	Alphanecrovirus	Potato necrosis virus	1725329	ssRNA(+)	plants	Plants
BC-0302410747|k141_89653.6	X87115	58.38	Orthornavirae	Kitrinoviricota	Tolucaviricetes	Tolivirales	Tombusviridae	Aureusvirus	Pothos latent virus	44562	ssRNA(+)	plants	Plants
BC-0302410747|k141_94345.4	M33002	50.62	Orthornavirae	Kitrinoviricota	Tolucaviricetes	Tolivirales	Tombusviridae	Alphanecrovirus	Tobacco necrosis virus A	12055	ssRNA(+)	plants	Plants
BC-0302410747|k141_95012.4	KT581451	37.36	Orthornavirae	Kitrinoviricota	Alsuviricetes	Tymovirales	Deltaflexiviridae	Deltaflexivirus	Sclerotinia deltaflexivirus 1	2169865	ssRNA(+)	fungi	Fungi
BC-0302410755|k141_34355.5	MN532662	96.58	Orthornavirae	Lenarviricota	Miaviricetes	Ourlivirales	Botourmiaviridae	Scleroulivirus	Scleroulivirus xiplasmoparae	2956422	ssRNA(+)	other (specify)	Others
BC-0302410755|k141_36800.1	MN532635	75	Orthornavirae	Lenarviricota	Miaviricetes	Ourlivirales	Botourmiaviridae	Betascleroulivirus	Betascleroulivirus kappaplasmoparae	2955485	ssRNA(+)	other (specify)	Others
BC-0302410755|k141_37064.6	EF375551	98.7	Orthornavirae	Kitrinoviricota	Alsuviricetes	Martellivirales	Virgaviridae	Tobamovirus	Rehmannia mosaic virus	425279	ssRNA(+)	plants	Plants
BC-0302410755|k141_38057.6	AJ271595	24.5	Orthornavirae	Kitrinoviricota	Alsuviricetes	Tymovirales	Tymoviridae		Poinsettia mosaic virus	113553	ssRNA(+)	plants	Plants
BC-0302410755|k141_49480.2	MN473199	73.64	Orthornavirae	Lenarviricota	Miaviricetes	Ourlivirales	Botourmiaviridae	Penoulivirus	Phoma penoulivirus	2845834	ssRNA(+)	fungi	Fungi
BC-0302410755|k141_69582.4	J04357	38.04	Orthornavirae	Kitrinoviricota	Tolucaviricetes	Tolivirales	Tombusviridae	Dianthovirus	Red clover necrotic mosaic virus	12267	ssRNA(+)	plants	Plants
BC-0302410755|k141_70824.3	MN532671	57.14	Orthornavirae	Lenarviricota	Miaviricetes	Ourlivirales	Botourmiaviridae	Penoulivirus	Penoulivirus gammaplasmoparae	2956292	ssRNA(+)	other (specify)	Others
BC-0302410755|k141_75757.5	M81413	100	Orthornavirae	Kitrinoviricota	Alsuviricetes	Martellivirales	Virgaviridae	Tobamovirus	Pepper mild mottle virus	12239	ssRNA(+)	plants	Plants	human
BC-0302410755|k141_80716.1	X02986	99.38	Orthornavirae	Kitrinoviricota	Tolucaviricetes	Tolivirales	Tombusviridae	Alphacarmovirus	Carnation mottle virus	11986	ssRNA(+)	plants	Plants
BC-0302410770|k141_111495.6	MN532626	37.26	Orthornavirae	Lenarviricota	Miaviricetes	Ourlivirales	Botourmiaviridae	Betascleroulivirus	Betascleroulivirus epsilonplasmoparae	2955481	ssRNA(+)	other (specify)	Others
BC-0302410770|k141_116853.6	MN532593	61.95	Orthornavirae	Lenarviricota	Miaviricetes	Ourlivirales	Botourmiaviridae	Magoulivirus	Magoulivirus betaplasmoparae	2956154	ssRNA(+)	other (specify)	Others
BC-0302410770|k141_119657.2	DQ356949	30.77	Orthornavirae	Kitrinoviricota	Alsuviricetes	Martellivirales	Virgaviridae	Tobamovirus	Maracuja mosaic virus	368736	ssRNA(+)	plants	Plants
BC-0302410770|k141_122476.1	JN052073	30.71	Orthornavirae	Pisuviricota	Pisoniviricetes	Picornavirales	Secoviridae	Sadwavirus	Chocolate lily virus A	1120751	ssRNA(+)	plants	Plants
BC-0302410770|k141_124517.6	X83964	53.33	Orthornavirae	Kitrinoviricota	Tolucaviricetes	Tolivirales	Tombusviridae	Avenavirus	Oat chlorotic stunt virus	146762	ssRNA	plants	Plants
BC-0302410770|k141_13746.6	KT598226	79.25	Orthornavirae	Kitrinoviricota	Alsuviricetes	Tymovirales	Deltaflexiviridae	Deltaflexivirus	Soybean-associated deltaflexivirus 1	2169866	ssRNA(+)	plants	Plants
BC-0302410770|k141_138651.2	AJ271595	23.91	Orthornavirae	Kitrinoviricota	Alsuviricetes	Tymovirales	Tymoviridae		Poinsettia mosaic virus	113553	ssRNA(+)	plants	Plants
BC-0302410770|k141_141258.5	D84410	50	Orthornavirae	Kitrinoviricota	Alsuviricetes	Hepelivirales	Benyviridae	Benyvirus	Beet necrotic yellow vein virus	31721	ssRNA(+)	plants	Plants
BC-0302410770|k141_2197.6	EF554577	26.05	Orthornavirae	Kitrinoviricota	Alsuviricetes	Tymovirales	Tymoviridae	Tymovirus	Okra mosaic virus	70822	ssRNA(+)	plants	Plants
BC-0302410770|k141_40742.4	X83964	47.27	Orthornavirae	Kitrinoviricota	Tolucaviricetes	Tolivirales	Tombusviridae	Avenavirus	Oat chlorotic stunt virus	146762	ssRNA	plants	Plants
BC-0302410770|k141_42899.6	AJ295948	27.36	Orthornavirae	Kitrinoviricota	Alsuviricetes	Martellivirales	Virgaviridae	Tobamovirus	Kyuri green mottle mosaic virus	111970	ssRNA(+)	plants	Plants
BC-0302410770|k141_44880.2	V01408	100	Orthornavirae	Kitrinoviricota	Alsuviricetes	Martellivirales	Virgaviridae	Tobamovirus	Tobacco mosaic virus	12242	ssRNA(+)	plants	Plants
BC-0302410770|k141_5424.4	MN532595	63.3	Orthornavirae	Lenarviricota	Miaviricetes	Ourlivirales	Botourmiaviridae	Magoulivirus	Magoulivirus deltaplasmoparae	2956155	ssRNA(+)	other (specify)	Others
BC-0302410770|k141_59813.4	U03387	87.01	Orthornavirae	Kitrinoviricota	Alsuviricetes	Martellivirales	Virgaviridae	Tobamovirus	Turnip vein-clearing virus	29272	ssRNA(+)	plants	Plants		yes	yes	yes
BC-0302410770|k141_68173.5	AJ607402	58.56	Orthornavirae	Kitrinoviricota	Tolucaviricetes	Tolivirales	Tombusviridae	Tombusvirus	Pelargonium necrotic spot virus	255587	ssRNA(+)	plants	Plants
BC-0302410770|k141_90203.4	KP901095	46.06	Orthornavirae	Kitrinoviricota	Tolucaviricetes	Tolivirales	Tombusviridae	Alphanecrovirus	Potato necrosis virus	1725329	ssRNA(+)	plants	Plants
BC-0302410781|k141_104019.2	MN473199	81.08	Orthornavirae	Lenarviricota	Miaviricetes	Ourlivirales	Botourmiaviridae	Penoulivirus	Phoma penoulivirus	2845834	ssRNA(+)	fungi	Fungi
BC-0302410781|k141_123182.6	HF677705	27.78	Orthornavirae	Pisuviricota	Pisoniviricetes	Picornavirales	Picornaviridae	Parechovirus	Parechovirus C	2031165	ssRNA(+)	vertebrates	Vertebrates	non_human_mammalia
BC-0302410781|k141_124255.6	X83964	53.01	Orthornavirae	Kitrinoviricota	Tolucaviricetes	Tolivirales	Tombusviridae	Avenavirus	Oat chlorotic stunt virus	146762	ssRNA	plants	Plants
BC-0302410781|k141_125115.6	J04357	46.85	Orthornavirae	Kitrinoviricota	Tolucaviricetes	Tolivirales	Tombusviridae	Dianthovirus	Red clover necrotic mosaic virus	12267	ssRNA(+)	plants	Plants
BC-0302410781|k141_126420.2	MF362666	24.79	Orthornavirae	Kitrinoviricota	Alsuviricetes	Martellivirales	Endornaviridae	Alphaendornavirus	Helianthus annuus alphaendornavirus	2184469	ssRNA(+)	plants	Plants
BC-0302410781|k141_1579.6	MG721540	61.95	Orthornavirae	Lenarviricota	Howeltoviricetes	Cryppavirales	Mitoviridae	Duamitovirus	Duamitovirus bevu1	2955768	ssRNA(+)	plants	Plants
BC-0302410781|k141_16167.5	KX159470	53.42	Orthornavirae	Kitrinoviricota	Tolucaviricetes	Tolivirales	Tombusviridae	Luteovirus	Cherry associated luteovirus	1912598	ssRNA(+)	plants	Plants
BC-0302410781|k141_19261.4	MN532643	69.49	Orthornavirae	Lenarviricota	Miaviricetes	Ourlivirales	Botourmiaviridae	Botoulivirus	Botoulivirus betaplasmoparae	2955519	ssRNA(+)	other (specify)	Others
BC-0302410781|k141_30943.2	MN532677	86.73	Orthornavirae	Lenarviricota	Miaviricetes	Ourlivirales	Botourmiaviridae	Penoulivirus	Penoulivirus thetaplasmoparae	2956296	ssRNA(+)	other (specify)	Others
BC-0302410781|k141_35842.2	MN532632	56.93	Orthornavirae	Lenarviricota	Miaviricetes	Ourlivirales	Botourmiaviridae	Epsilonscleroulivirus	Epsilonscleroulivirus plasmoparae	2955871	ssRNA(+)	other (specify)	Others
BC-0302410781|k141_40790.5	MN532662	96.58	Orthornavirae	Lenarviricota	Miaviricetes	Ourlivirales	Botourmiaviridae	Scleroulivirus	Scleroulivirus xiplasmoparae	2956422	ssRNA(+)	other (specify)	Others
BC-0302410781|k141_50851.4	JF495127	38.22	Orthornavirae	Pisuviricota	Pisoniviricetes	Sobelivirales	Solemoviridae	Sobemovirus	Soybean yellow common mosaic virus	1080798	ssRNA(+)	plants	Plants
BC-0302410781|k141_56758.1	U90136	32.8	Orthornavirae	Lenarviricota	Amabiliviricetes	Wolframvirales	Narnaviridae	Narnavirus	Saccharomyces 23S RNA narnavirus	198599	ssRNA(+)	fungi	Fungi
BC-0302410781|k141_60241.6	LT221868	99.11	Orthornavirae	Kitrinoviricota	Alsuviricetes	Martellivirales	Mayoviridae	Idaeovirus	Idaeovirus ligustri	2560648	ssRNA(+)	plants	Plants
BC-0302410781|k141_7135.5	BK013685	64.8	Orthornavirae	Lenarviricota	Leviviricetes	Norzivirales	Duinviridae	Samuneavirus	Samuneavirus asiocola	2846144	ssRNA(+)	bacteria	Bacteria
BC-0302410781|k141_72820.3	BK010429	51.3	Orthornavirae	Lenarviricota	Howeltoviricetes	Cryppavirales	Mitoviridae	Duamitovirus	Duamitovirus dapi1	2955778	ssRNA(+)	plants	Plants
BC-0302410781|k141_735.3	D86123	54.04	Orthornavirae	Kitrinoviricota	Tolucaviricetes	Tolivirales	Tombusviridae	Betacarmovirus	Japanese iris necrotic ring virus	77344	ssRNA(+)	plants	Plants
BC-0302410781|k141_74721.2	JN117276	69.75	Orthornavirae	Pisuviricota	Duplopiviricetes	Durnavirales	Partitiviridae	Deltapartitivirus	Pepper cryptic virus 1	369643	dsRNA	plants	Plants
BC-0302410781|k141_76263.6	MK584843	70.25	Orthornavirae	Lenarviricota	Miaviricetes	Ourlivirales	Botourmiaviridae	Penoulivirus	Phaeoacremonium penoulivirus	2845807	ssRNA(+)	fungi	Fungi
BC-0302410781|k141_78255.5	U03387	87.01	Orthornavirae	Kitrinoviricota	Alsuviricetes	Martellivirales	Virgaviridae	Tobamovirus	Turnip vein-clearing virus	29272	ssRNA(+)	plants	Plants
BC-0302410781|k141_83535.1	V01408	100	Orthornavirae	Kitrinoviricota	Alsuviricetes	Martellivirales	Virgaviridae	Tobamovirus	Tobacco mosaic virus	12242	ssRNA(+)	plants	Plants
BC-0302410781|k141_8699.3	KT598226	92.59	Orthornavirae	Kitrinoviricota	Alsuviricetes	Tymovirales	Deltaflexiviridae	Deltaflexivirus	Soybean-associated deltaflexivirus 1	2169866	ssRNA(+)	plants	Plants
BC-0302410781|k141_92766.5	MG721540	64.29	Orthornavirae	Lenarviricota	Howeltoviricetes	Cryppavirales	Mitoviridae	Duamitovirus	Duamitovirus bevu1	2955768	ssRNA(+)	plants	Plants
BC-0302410801|k141_12055.1	MN532600	67.27	Orthornavirae	Lenarviricota	Miaviricetes	Ourlivirales	Botourmiaviridae	Magoulivirus	Magoulivirus iotaplasmoparae	2956160	ssRNA(+)	other (specify)	Others
BC-0302410801|k141_4353.3	KC610514	54.17	Orthornavirae	Duplornaviricota	Chrymotiviricetes	Ghabrivirales	Totiviridae	Totivirus	Scheffersomyces segobiensis virus L	1300323	dsRNA	fungi	Fungi
BC-0302410801|k141_7315.1	V01408	100	Orthornavirae	Kitrinoviricota	Alsuviricetes	Martellivirales	Virgaviridae	Tobamovirus	Tobacco mosaic virus	12242	ssRNA(+)	plants	Plants
BC-0302410801|k141_7451.4	KC610514	60.33	Orthornavirae	Duplornaviricota	Chrymotiviricetes	Ghabrivirales	Totiviridae	Totivirus	Scheffersomyces segobiensis virus L	1300323	dsRNA	fungi	Fungi
BC-0302410801|k141_7631.6	D00355	97.25	Orthornavirae	Kitrinoviricota	Alsuviricetes	Martellivirales	Bromoviridae	Cucumovirus	Cucumber mosaic virus	12305	ssRNA(+)	plants	Plants
BC-0302410801|k141_7706.5	M81413	100	Orthornavirae	Kitrinoviricota	Alsuviricetes	Martellivirales	Virgaviridae	Tobamovirus	Pepper mild mottle virus	12239	ssRNA(+)	plants	Plants	human
BC-0302410805|k141_106253.2	LC195294	67.9	Orthornavirae	Pisuviricota	Duplopiviricetes	Durnavirales	Partitiviridae	Deltapartitivirus	Pepper cryptic virus 2	1050903	dsRNA	plants	Plants
BC-0302410805|k141_166261.4	LT221868	79.65	Orthornavirae	Kitrinoviricota	Alsuviricetes	Martellivirales	Mayoviridae	Idaeovirus	Idaeovirus ligustri	2560648	ssRNA(+)	plants	Plants
BC-0302410805|k141_2229.2	AB569997	63.54	Orthornavirae	Pisuviricota	Duplopiviricetes	Durnavirales	Partitiviridae	Alphapartitivirus	Rosellinia necatrix partitivirus 2	859651	dsRNA	fungi	Fungi
BC-0302410805|k141_23683.6	V01408	100	Orthornavirae	Kitrinoviricota	Alsuviricetes	Martellivirales	Virgaviridae	Tobamovirus	Tobacco mosaic virus	12242	ssRNA(+)	plants	Plants
BC-0302410805|k141_51930.1	MG721540	61.95	Orthornavirae	Lenarviricota	Howeltoviricetes	Cryppavirales	Mitoviridae	Duamitovirus	Duamitovirus bevu1	2955768	ssRNA(+)	plants	Plants
BC-0302410808|k141_21219.3	MG721540	61.95	Orthornavirae	Lenarviricota	Howeltoviricetes	Cryppavirales	Mitoviridae	Duamitovirus	Duamitovirus bevu1	2955768	ssRNA(+)	plants	Plants
BC-0302410808|k141_25685.5	MN605476	80.77	Orthornavirae	Lenarviricota	Miaviricetes	Ourlivirales	Botourmiaviridae	Betascleroulivirus	Betascleroulivirus botrytidis	2955479	ssRNA(+)	fungi	Fungi
BC-0302410808|k141_5618.6	MN532631	62.93	Orthornavirae	Lenarviricota	Miaviricetes	Ourlivirales	Botourmiaviridae	Scleroulivirus	Scleroulivirus alphaplasmoparae	2956405	ssRNA(+)	other (specify)	Others
BC-0302410808|k141_6874.6	V01408	100	Orthornavirae	Kitrinoviricota	Alsuviricetes	Martellivirales	Virgaviridae	Tobamovirus	Tobacco mosaic virus	12242	ssRNA(+)	plants	Plants
BC-0302410809|k141_235.5	MN532613	100	Orthornavirae	Lenarviricota	Miaviricetes	Ourlivirales	Botourmiaviridae	Magoulivirus	Magoulivirus jiplasmoparae	2956162	ssRNA(+)	other (specify)	Others
BC-0302410944|k141_101607.3	AF278535	97.37	Orthornavirae	Kitrinoviricota	Alsuviricetes	Martellivirales	Bromoviridae	Ilarvirus	Prunus necrotic ringspot virus	37733	ssRNA(+)	plants	Plants
BC-0302410944|k141_101621.3	KF543244	26.58	Orthornavirae	Negarnaviricota	Ellioviricetes	Bunyavirales	Phenuiviridae	Goukovirus	Cumuto goukovirus	1980546	ssRNA(-)	invertebrates	Invertebrates
BC-0302410944|k141_112752.6	MG721540	62.5	Orthornavirae	Lenarviricota	Howeltoviricetes	Cryppavirales	Mitoviridae	Duamitovirus	Duamitovirus bevu1	2955768	ssRNA(+)	plants	Plants
BC-0302410944|k141_114809.3	KR997836	34.96	Orthornavirae	Lenarviricota	Miaviricetes	Ourlivirales	Botourmiaviridae	Penoulivirus	Phomosis penoulivirus	2845835	ssRNA(+)	fungi	Fungi
BC-0302410944|k141_116148.6	MN532614	70.8	Orthornavirae	Lenarviricota	Miaviricetes	Ourlivirales	Botourmiaviridae	Magoulivirus	Magoulivirus psiplasmoparae	2956171	ssRNA(+)	other (specify)	Others
BC-0302410944|k141_123490.5	MN532656	62.5	Orthornavirae	Lenarviricota	Miaviricetes	Ourlivirales	Botourmiaviridae	Scleroulivirus	Scleroulivirus thetaplasmoparae	2956421	ssRNA(+)	other (specify)	Others
BC-0302410944|k141_129309.3	MN532614	69.72	Orthornavirae	Lenarviricota	Miaviricetes	Ourlivirales	Botourmiaviridae	Magoulivirus	Magoulivirus psiplasmoparae	2956171	ssRNA(+)	other (specify)	Others
BC-0302410944|k141_130912.2	KX977569	29.58	Orthornavirae	Kitrinoviricota	Alsuviricetes	Martellivirales	Endornaviridae	Alphaendornavirus	Bell pepper alphaendornavirus	354328	ssRNA(+)	plants	Plants
BC-0302410944|k141_132833.3	MN532602	68.91	Orthornavirae	Lenarviricota	Miaviricetes	Ourlivirales	Botourmiaviridae	Magoulivirus	Magoulivirus lambdaplasmoparae	2956164	ssRNA(+)	other (specify)	Others
BC-0302410944|k141_14388.5	MN532604	52.78	Orthornavirae	Lenarviricota	Miaviricetes	Ourlivirales	Botourmiaviridae	Magoulivirus	Magoulivirus niplasmoparae	2956167	ssRNA(+)	other (specify)	Others
BC-0302410944|k141_16417.5	AB923924	25.26	Orthornavirae	Kitrinoviricota	Alsuviricetes	Martellivirales	Closteroviridae	Olivavirus	Persimmon virus B	1493829	ssRNA(+)	plants	Plants
BC-0302410944|k141_1885.3	HQ389540	30.73	Orthornavirae	Kitrinoviricota	Alsuviricetes	Martellivirales	Virgaviridae	Tobamovirus	Passion fruit mosaic virus	1032457	ssRNA(+)	plants	Plants
BC-0302410944|k141_19793.4	MN532614	72.64	Orthornavirae	Lenarviricota	Miaviricetes	Ourlivirales	Botourmiaviridae	Magoulivirus	Magoulivirus psiplasmoparae	2956171	ssRNA(+)	other (specify)	Others
BC-0302410944|k141_21266.5	BK010429	53.45	Orthornavirae	Lenarviricota	Howeltoviricetes	Cryppavirales	Mitoviridae	Duamitovirus	Duamitovirus dapi1	2955778	ssRNA(+)	plants	Plants
BC-0302410944|k141_23619.5	KT238881	34.15	Orthornavirae	Pisuviricota	Pisoniviricetes	Picornavirales	Secoviridae	Waikavirus	Bellflower vein chlorosis virus	1720595	ssRNA(+)	plants	Plants
BC-0302410944|k141_23646.2	V01408	100	Orthornavirae	Kitrinoviricota	Alsuviricetes	Martellivirales	Virgaviridae	Tobamovirus	Tobacco mosaic virus	12242	ssRNA(+)	plants	Plants
BC-0302410944|k141_27623.2	MN532625	56.8	Orthornavirae	Lenarviricota	Miaviricetes	Ourlivirales	Botourmiaviridae	Betascleroulivirus	Betascleroulivirus deltaplasmoparae	2955480	ssRNA(+)	other (specify)	Others
BC-0302410944|k141_31471.6	MN557000	79.68	Orthornavirae	Negarnaviricota	Monjiviricetes	Mononegavirales	Mymonaviridae	Penicillimonavirus	Penicillimonavirus deltaplasmoparae	2845789	ssRNA(-)	protist	Others
BC-0302410944|k141_32218.5	KT598226	64.71	Orthornavirae	Kitrinoviricota	Alsuviricetes	Tymovirales	Deltaflexiviridae	Deltaflexivirus	Soybean-associated deltaflexivirus 1	2169866	ssRNA(+)	plants	Plants
BC-0302410944|k141_32414.6	U03387	87.01	Orthornavirae	Kitrinoviricota	Alsuviricetes	Martellivirales	Virgaviridae	Tobamovirus	Turnip vein-clearing virus	29272	ssRNA(+)	plants	Plants
BC-0302410944|k141_35279.1	J04357	43.12	Orthornavirae	Kitrinoviricota	Tolucaviricetes	Tolivirales	Tombusviridae	Dianthovirus	Red clover necrotic mosaic virus	12267	ssRNA(+)	plants	Plants
BC-0302410944|k141_35484.5	MG721540	63.39	Orthornavirae	Lenarviricota	Howeltoviricetes	Cryppavirales	Mitoviridae	Duamitovirus	Duamitovirus bevu1	2955768	ssRNA(+)	plants	Plants
BC-0302410944|k141_36148.5	MK605686	73.15	Orthornavirae	Kitrinoviricota	Alsuviricetes	Tymovirales	Gammaflexiviridae	Xylavirus	Xylavirus EntGFV-2	2956703	ssRNA(+)	fungi	Fungi
BC-0302410944|k141_43380.1	U90136	23.66	Orthornavirae	Lenarviricota	Amabiliviricetes	Wolframvirales	Narnaviridae	Narnavirus	Saccharomyces 23S RNA narnavirus	198599	ssRNA(+)	fungi	Fungi
BC-0302410944|k141_45118.5	MN532614	69.72	Orthornavirae	Lenarviricota	Miaviricetes	Ourlivirales	Botourmiaviridae	Magoulivirus	Magoulivirus psiplasmoparae	2956171	ssRNA(+)	other (specify)	Others
BC-0302410944|k141_52772.5	KC904540	33.33	Orthornavirae	Kitrinoviricota	Alsuviricetes	Martellivirales	Closteroviridae	Ampelovirus	Blackberry vein banding-associated virus	1381464	ssRNA(+)	plants	Plants
BC-0302410944|k141_5428.1	MT062429	66.36	Orthornavirae	Lenarviricota	Miaviricetes	Ourlivirales	Botourmiaviridae	Magoulivirus	Magoulivirus alphamacrophominae	2956150	ssRNA(+)	fungi	Fungi
BC-0302410944|k141_54314.1	BK010429	54.31	Orthornavirae	Lenarviricota	Howeltoviricetes	Cryppavirales	Mitoviridae	Duamitovirus	Duamitovirus dapi1	2955778	ssRNA(+)	plants	Plants
BC-0302410944|k141_56462.5	KR997836	38.02	Orthornavirae	Lenarviricota	Miaviricetes	Ourlivirales	Botourmiaviridae	Penoulivirus	Phomosis penoulivirus	2845835	ssRNA(+)	fungi	Fungi
BC-0302410944|k141_57125.2	LT221868	99	Orthornavirae	Kitrinoviricota	Alsuviricetes	Martellivirales	Mayoviridae	Idaeovirus	Idaeovirus ligustri	2560648	ssRNA(+)	plants	Plants
BC-0302410944|k141_57178.5	AY613852	29.3	Orthornavirae	Kitrinoviricota	Tolucaviricetes	Tolivirales	Tombusviridae	Pelarspovirus	Pelargonium line pattern virus	167019	ssRNA(+)	plants	Plants
BC-0302410944|k141_59747.1	MN605476	71.89	Orthornavirae	Lenarviricota	Miaviricetes	Ourlivirales	Botourmiaviridae	Betascleroulivirus	Betascleroulivirus botrytidis	2955479	ssRNA(+)	fungi	Fungi
BC-0302410944|k141_59781.2	U90136	26.58	Orthornavirae	Lenarviricota	Amabiliviricetes	Wolframvirales	Narnaviridae	Narnavirus	Saccharomyces 23S RNA narnavirus	198599	ssRNA(+)	fungi	Fungi
BC-0302410944|k141_61890.3	BK010429	54.31	Orthornavirae	Lenarviricota	Howeltoviricetes	Cryppavirales	Mitoviridae	Duamitovirus	Duamitovirus dapi1	2955778	ssRNA(+)	plants	Plants
BC-0302410944|k141_63669.3	MN557004	57.14	Orthornavirae	Negarnaviricota	Monjiviricetes	Mononegavirales	Mymonaviridae	Plasmopamonavirus	Plasmopamonavirus plasmoparae	2845860	ssRNA(-)	protist	Others
BC-0302410944|k141_65292.4	AJ295948	27.86	Orthornavirae	Kitrinoviricota	Alsuviricetes	Martellivirales	Virgaviridae	Tobamovirus	Kyuri green mottle mosaic virus	111970	ssRNA(+)	plants	Plants
BC-0302410944|k141_726.6	MN532641	29.13	Orthornavirae	Lenarviricota	Miaviricetes	Ourlivirales	Botourmiaviridae	Betabotoulivirus	Betabotoulivirus zetaplasmoparae	2955439	ssRNA(+)	other (specify)	Others
BC-0302410944|k141_78652.1	MG721540	61.61	Orthornavirae	Lenarviricota	Howeltoviricetes	Cryppavirales	Mitoviridae	Duamitovirus	Duamitovirus bevu1	2955768	ssRNA(+)	plants	Plants
BC-0302410944|k141_80794.1	MN532604	66.67	Orthornavirae	Lenarviricota	Miaviricetes	Ourlivirales	Botourmiaviridae	Magoulivirus	Magoulivirus niplasmoparae	2956167	ssRNA(+)	other (specify)	Others
BC-0302410944|k141_81351.4	MN532611	57.9	Orthornavirae	Lenarviricota	Miaviricetes	Ourlivirales	Botourmiaviridae	Magoulivirus	Magoulivirus ipsilonplasmoparae	2956161	ssRNA(+)	other (specify)	Others
BC-0302410944|k141_83279.2	AF039063	32.52	Orthornavirae	Lenarviricota	Amabiliviricetes	Wolframvirales	Narnaviridae	Narnavirus	Saccharomyces 20S RNA narnavirus	186772	ssRNA(+)	fungi	Fungi
BC-0302410944|k141_86244.2	MN473199	76.25	Orthornavirae	Lenarviricota	Miaviricetes	Ourlivirales	Botourmiaviridae	Penoulivirus	Phoma penoulivirus	2845834	ssRNA(+)	fungi	Fungi
BC-0302410944|k141_8823.2	U90136	28.48	Orthornavirae	Lenarviricota	Amabiliviricetes	Wolframvirales	Narnaviridae	Narnavirus	Saccharomyces 23S RNA narnavirus	198599	ssRNA(+)	fungi	Fungi
BC-0302410944|k141_88278.1	EU980442	37.97	Orthornavirae	Pisuviricota	Pisoniviricetes	Picornavirales	Secoviridae	Sequivirus	Carrot necrotic dieback virus	680112	ssRNA(+)	plants	Plants
BC-0302410944|k141_88676.1	MN532662	96.58	Orthornavirae	Lenarviricota	Miaviricetes	Ourlivirales	Botourmiaviridae	Scleroulivirus	Scleroulivirus xiplasmoparae	2956422	ssRNA(+)	other (specify)	Others
BC-0302410944|k141_89686.1	MN532622	75.96	Orthornavirae	Lenarviricota	Miaviricetes	Ourlivirales	Botourmiaviridae	Betascleroulivirus	Betascleroulivirus betaplasmoparae	2955478	ssRNA(+)	other (specify)	Others
BC-0302410944|k141_89822.1	MN532614	69.72	Orthornavirae	Lenarviricota	Miaviricetes	Ourlivirales	Botourmiaviridae	Magoulivirus	Magoulivirus psiplasmoparae	2956171	ssRNA(+)	other (specify)	Others
BC-0302410944|k141_91097.2	U22521	29.85	Orthornavirae	Pisuviricota	Pisoniviricetes	Picornavirales	Picornaviridae	Enterovirus	Enterovirus A	138948	ssRNA(+)	vertebrates	Vertebrates	human
BC-0302410944|k141_93667.5	MN605476	76.92	Orthornavirae	Lenarviricota	Miaviricetes	Ourlivirales	Botourmiaviridae	Betascleroulivirus	Betascleroulivirus botrytidis	2955479	ssRNA(+)	fungi	Fungi
BC-0302410944|k141_96792.2	BK010429	52.17	Orthornavirae	Lenarviricota	Howeltoviricetes	Cryppavirales	Mitoviridae	Duamitovirus	Duamitovirus dapi1	2955778	ssRNA(+)	plants	Plants
BC-0302410944|k141_97606.6	MN473199	74.11	Orthornavirae	Lenarviricota	Miaviricetes	Ourlivirales	Botourmiaviridae	Penoulivirus	Phoma penoulivirus	2845834	ssRNA(+)	fungi	Fungi
BC-0302410944|k141_99944.3	MN532614	72.64	Orthornavirae	Lenarviricota	Miaviricetes	Ourlivirales	Botourmiaviridae	Magoulivirus	Magoulivirus psiplasmoparae	2956171	ssRNA(+)	other (specify)	Others
BC-0302411025|k141_17230.2	EF375551	98.7	Orthornavirae	Kitrinoviricota	Alsuviricetes	Martellivirales	Virgaviridae	Tobamovirus	Rehmannia mosaic virus	425279	ssRNA(+)	plants	Plants
BC-0302411025|k141_27697.5	X02986	99.38	Orthornavirae	Kitrinoviricota	Tolucaviricetes	Tolivirales	Tombusviridae	Alphacarmovirus	Carnation mottle virus	11986	ssRNA(+)	plants	Plants
BC-0302411025|k141_43077.6	M81413	100	Orthornavirae	Kitrinoviricota	Alsuviricetes	Martellivirales	Virgaviridae	Tobamovirus	Pepper mild mottle virus	12239	ssRNA(+)	plants	Plants	human
BC-0302411025|k141_5338.1	V01408	100	Orthornavirae	Kitrinoviricota	Alsuviricetes	Martellivirales	Virgaviridae	Tobamovirus	Tobacco mosaic virus	12242	ssRNA(+)	plants	Plants
BC-0302411025|k141_5578.2	U22521	29.85	Orthornavirae	Pisuviricota	Pisoniviricetes	Picornavirales	Picornaviridae	Enterovirus	Enterovirus A	138948	ssRNA(+)	vertebrates	Vertebrates	human
BC-0302411025|k141_56327.5	FR687854	70.8	Orthornavirae	Pisuviricota	Duplopiviricetes	Durnavirales	Partitiviridae	Deltapartitivirus	Fig cryptic virus	882768	dsRNA	plants	Plants
BC-0302411025|k141_62464.3	AB113347	56.99	Orthornavirae	Pisuviricota	Duplopiviricetes	Durnavirales	Partitiviridae	Betapartitivirus	Rosellinia necatrix virus 1	674984	dsRNA	fungi	Fungi
BC-0302411025|k141_67430.3	KT598226	35.08	Orthornavirae	Kitrinoviricota	Alsuviricetes	Tymovirales	Deltaflexiviridae	Deltaflexivirus	Soybean-associated deltaflexivirus 1	2169866	ssRNA(+)	plants	Plants
BC-0302411025|k141_7933.4	KX977569	23.42	Orthornavirae	Kitrinoviricota	Alsuviricetes	Martellivirales	Endornaviridae	Alphaendornavirus	Bell pepper alphaendornavirus	354328	ssRNA(+)	plants	Plants
BC-0302411034|k141_103219.4	MN532595	63.3	Orthornavirae	Lenarviricota	Miaviricetes	Ourlivirales	Botourmiaviridae	Magoulivirus	Magoulivirus deltaplasmoparae	2956155	ssRNA(+)	other (specify)	Others
BC-0302411034|k141_12354.6	X01572	25.96	Orthornavirae	Kitrinoviricota	Alsuviricetes	Martellivirales	Bromoviridae	Alfamovirus	Alfalfa mosaic virus	12321	ssRNA(+)	plants	Plants
BC-0302411034|k141_15871.4	MF358731	27.97	Orthornavirae	Pisuviricota	Pisoniviricetes	Picornavirales	Picornaviridae	Ludopivirus	Ludopivirus A	NA	ssRNA(+)	vertebrates	Vertebrates
BC-0302411034|k141_16556.1	MN532650	55.24	Orthornavirae	Lenarviricota	Miaviricetes	Ourlivirales	Botourmiaviridae	Scleroulivirus	Scleroulivirus epsilonplasmoparae	2956408	ssRNA(+)	other (specify)	Others
BC-0302411034|k141_16837.4	AB465308	38.31	Orthornavirae	Pisuviricota	Duplopiviricetes	Durnavirales	Partitiviridae	Alphapartitivirus	Flammulina velutipes browning virus	568090	dsRNA	fungi	Fungi
BC-0302411034|k141_17697.6	JN566124	27.87	Orthornavirae	Kitrinoviricota	Alsuviricetes	Martellivirales	Virgaviridae	Tobamovirus	Clitoria yellow mottle virus	1128119	ssRNA(+)	plants	Plants
BC-0302411034|k141_23252.5	X85989	41.07	Orthornavirae	Kitrinoviricota	Tolucaviricetes	Tolivirales	Tombusviridae	Alphanecrovirus	Olive latent virus 1	47669	ssRNA(+)	plants	Plants
BC-0302411034|k141_27603.6	X83964	52.12	Orthornavirae	Kitrinoviricota	Tolucaviricetes	Tolivirales	Tombusviridae	Avenavirus	Oat chlorotic stunt virus	146762	ssRNA	plants	Plants
BC-0302411034|k141_37213.1	KR080326	28.12	Orthornavirae	Kitrinoviricota	Alsuviricetes	Martellivirales	Endornaviridae	Alphaendornavirus	Hot pepper alphaendornavirus	1711684	ssRNA(+)	plants	Plants
BC-0302411034|k141_41742.2	KX884000	24.43	Orthornavirae	Negarnaviricota	Chunqiuviricetes	Muvirales	Qinviridae	Yingvirus	Yingvirus charybdis	2507499	ssRNA(-)	invertebrates	Invertebrates
BC-0302411034|k141_45435.4	BK013751	57.03	Orthornavirae	Lenarviricota	Leviviricetes	Norzivirales	Duinviridae	Kahshuvirus	Kahshuvirus borborenecus	2845039	ssRNA(+)	bacteria	Bacteria
BC-0302411034|k141_54518.5	MK584828	66.47	Orthornavirae	Lenarviricota	Howeltoviricetes	Cryppavirales	Mitoviridae	Duamitovirus	Duamitovirus epni1	2955779	ssRNA(+)	fungi	Fungi
BC-0302411034|k141_58118.5	MK372900	58.54	Orthornavirae	Lenarviricota	Howeltoviricetes	Cryppavirales	Mitoviridae	Duamitovirus	Duamitovirus rhso31	2955806	ssRNA(+)	fungi	Fungi
BC-0302411034|k141_59796.3	HQ389540	31	Orthornavirae	Kitrinoviricota	Alsuviricetes	Martellivirales	Virgaviridae	Tobamovirus	Passion fruit mosaic virus	1032457	ssRNA(+)	plants	Plants
BC-0302411034|k141_65331.2	M34077	99.32	Orthornavirae	Kitrinoviricota	Alsuviricetes	Martellivirales	Virgaviridae	Tobamovirus	Tobacco mild green mosaic virus	12241	ssRNA(+)	plants	Plants
BC-0302411034|k141_72242.2	MK372900	54.97	Orthornavirae	Lenarviricota	Howeltoviricetes	Cryppavirales	Mitoviridae	Duamitovirus	Duamitovirus rhso31	2955806	ssRNA(+)	fungi	Fungi
BC-0302411034|k141_73749.3	Y10973	30.11	Orthornavirae	Pisuviricota	Stelpaviricetes	Patatavirales	Potyviridae	Bymovirus	Barley mild mosaic virus	12466	ssRNA(+)	plants	Plants
BC-0302411034|k141_88200.4	MK372894	52.79	Orthornavirae	Lenarviricota	Howeltoviricetes	Cryppavirales	Mitoviridae	Duamitovirus	Duamitovirus rhso25	2955803	ssRNA(+)	fungi	Fungi
BC-0302411034|k141_91351.6	MN532672	54.51	Orthornavirae	Lenarviricota	Miaviricetes	Ourlivirales	Botourmiaviridae	Penoulivirus	Penoulivirus deltaplasmoparae	2956288	ssRNA(+)	other (specify)	Others
BC-0302411034|k141_93093.4	KX884032	22.78	Orthornavirae	Negarnaviricota	Yunchangviricetes	Goujianvirales	Yueviridae	Yuyuevirus	Yuyuevirus beihaiense	2508254	ssRNA(-)	invertebrates	Invertebrates
BC-0302411039|k141_16090.2	M34077	100	Orthornavirae	Kitrinoviricota	Alsuviricetes	Martellivirales	Virgaviridae	Tobamovirus	Tobacco mild green mosaic virus	12241	ssRNA(+)	plants	Plants
BC-0302411039|k141_21295.1	KC610514	62.19	Orthornavirae	Duplornaviricota	Chrymotiviricetes	Ghabrivirales	Totiviridae	Totivirus	Scheffersomyces segobiensis virus L	1300323	dsRNA	fungi	Fungi
BC-0302411039|k141_41092.2	V01408	98.7	Orthornavirae	Kitrinoviricota	Alsuviricetes	Martellivirales	Virgaviridae	Tobamovirus	Tobacco mosaic virus	12242	ssRNA(+)	plants	Plants
BC-0302411039|k141_7097.4	KJ562187	28.57	Orthornavirae	Kitrinoviricota	Alsuviricetes	Hepelivirales	Hepeviridae	Chirohepevirus	Chirohepevirus rhinolophi	NA	ssRNA(+)	vertebrates	Vertebrates
BC-0302411041|k141_13249.5	MN532601	70.69	Orthornavirae	Lenarviricota	Miaviricetes	Ourlivirales	Botourmiaviridae	Magoulivirus	Magoulivirus kappaplasmoparae	2956163	ssRNA(+)	other (specify)	Others
BC-0302411041|k141_30046.3	V01408	100	Orthornavirae	Kitrinoviricota	Alsuviricetes	Martellivirales	Virgaviridae	Tobamovirus	Tobacco mosaic virus	12242	ssRNA(+)	plants	Plants
BC-0302411041|k141_4005.6	MN532662	88.68	Orthornavirae	Lenarviricota	Miaviricetes	Ourlivirales	Botourmiaviridae	Scleroulivirus	Scleroulivirus xiplasmoparae	2956422	ssRNA(+)	other (specify)	Others
BC-0302411041|k141_4060.4	MN532613	99.1	Orthornavirae	Lenarviricota	Miaviricetes	Ourlivirales	Botourmiaviridae	Magoulivirus	Magoulivirus jiplasmoparae	2956162	ssRNA(+)	other (specify)	Others
BC-0302411041|k141_41378.2	MN532677	86.73	Orthornavirae	Lenarviricota	Miaviricetes	Ourlivirales	Botourmiaviridae	Penoulivirus	Penoulivirus thetaplasmoparae	2956296	ssRNA(+)	other (specify)	Others
BC-0302411048|k141_16654.4	X83964	56.02	Orthornavirae	Kitrinoviricota	Tolucaviricetes	Tolivirales	Tombusviridae	Avenavirus	Oat chlorotic stunt virus	146762	ssRNA	plants	Plants
BC-0302411048|k141_25280.2	KC610514	61.16	Orthornavirae	Duplornaviricota	Chrymotiviricetes	Ghabrivirales	Totiviridae	Totivirus	Scheffersomyces segobiensis virus L	1300323	dsRNA	fungi	Fungi
BC-0302411048|k141_25769.6	V01408	100	Orthornavirae	Kitrinoviricota	Alsuviricetes	Martellivirales	Virgaviridae	Tobamovirus	Tobacco mosaic virus	12242	ssRNA(+)	plants	Plants
BC-0302411048|k141_4614.1	AF484251	94.52	Orthornavirae	Kitrinoviricota	Alsuviricetes	Tymovirales	Alphaflexiviridae	Potexvirus	Pepino mosaic virus	112229	ssRNA(+)	plants	Plants
BC-0302411048|k141_47399.4	U22521	31.34	Orthornavirae	Pisuviricota	Pisoniviricetes	Picornavirales	Picornaviridae	Enterovirus	Enterovirus A	138948	ssRNA(+)	vertebrates	Vertebrates	human
BC-0302411048|k141_51153.2	KT383474	100	Orthornavirae	Kitrinoviricota	Alsuviricetes	Martellivirales	Virgaviridae	Tobamovirus	Tomato brown rugose fruit virus	1761477	ssRNA(+)	plants	Plants
BC-0302411048|k141_54834.4	JN117276	76.92	Orthornavirae	Pisuviricota	Duplopiviricetes	Durnavirales	Partitiviridae	Deltapartitivirus	Pepper cryptic virus 1	369643	dsRNA	plants	Plants
BC-0302411054|k141_4662.3	U01060	57.26	Orthornavirae	Duplornaviricota	Chrymotiviricetes	Ghabrivirales	Totiviridae	Totivirus	Saccharomyces cerevisiae virus LBCLa	2170233	dsRNA	fungi	Fungi
BC-0302411054|k141_5850.6	U62546	34.97	Orthornavirae	Kitrinoviricota	Tolucaviricetes	Tolivirales	Tombusviridae	Betanecrovirus	Tobacco necrosis virus D	12056	ssRNA(+)	plants	Plants
BC-0302411054|k141_6861.2	U01060	52.5	Orthornavirae	Duplornaviricota	Chrymotiviricetes	Ghabrivirales	Totiviridae	Totivirus	Saccharomyces cerevisiae virus LBCLa	2170233	dsRNA	fungi	Fungi
BC-0302411054|k141_7567.1	BK013632	68.67	Orthornavirae	Lenarviricota	Leviviricetes	Timlovirales	Steitzviridae	Gihfavirus	Gihfavirus pelohabitans	2844652	ssRNA(+)	bacteria	Bacteria
BC-0302411064|k141_21348.1	BK013687	67.11	Orthornavirae	Lenarviricota	Leviviricetes	Norzivirales	Fiersviridae	Vinehtivirus	Vinehtivirus limicola	2846613	ssRNA(+)	bacteria	Bacteria
BC-0302411064|k141_25237.3	V01408	100	Orthornavirae	Kitrinoviricota	Alsuviricetes	Martellivirales	Virgaviridae	Tobamovirus	Tobacco mosaic virus	12242	ssRNA(+)	plants	Plants
BC-0302411064|k141_27737.4	AY613852	29.69	Orthornavirae	Kitrinoviricota	Tolucaviricetes	Tolivirales	Tombusviridae	Pelarspovirus	Pelargonium line pattern virus	167019	ssRNA(+)	plants	Plants
BC-0302411064|k141_33537.1	EU081018	87.12	Orthornavirae	Kitrinoviricota	Tolucaviricetes	Tolivirales	Tombusviridae	Panicovirus	Cocksfoot mild mosaic virus	479060	ssRNA(+)	plants	Plants
BC-0302411064|k141_39630.2	HQ871931	31.63	Orthornavirae	Kitrinoviricota	Magsaviricetes	Nodamuvirales	Sinhaliviridae	Sinaivirus	Lake Sinai virus 1	1041806	ssRNA(+)	invertebrates	Invertebrates
BC-0302411064|k141_46694.2	MN532641	31.36	Orthornavirae	Lenarviricota	Miaviricetes	Ourlivirales	Botourmiaviridae	Betabotoulivirus	Betabotoulivirus zetaplasmoparae	2955439	ssRNA(+)	other (specify)	Others
BC-0302411064|k141_55339.6	MK507958	29.38	Orthornavirae	Lenarviricota	Miaviricetes	Ourlivirales	Botourmiaviridae	Penoulivirus	Magnaporthe penoulivirus	2845557	ssRNA(+)	fungi	Fungi
BC-0302411064|k141_55525.5	KR349343	32.11	Orthornavirae	Kitrinoviricota	Alsuviricetes	Tymovirales	Betaflexiviridae	Carlavirus	Atractylodes mottle virus	1702121	ssRNA(+)	plants	Plants
BC-0302411064|k141_56759.5	AF484251	93.66	Orthornavirae	Kitrinoviricota	Alsuviricetes	Tymovirales	Alphaflexiviridae	Potexvirus	Pepino mosaic virus	112229	ssRNA(+)	plants	Plants
BC-0302411064|k141_58842.2	M34077	100	Orthornavirae	Kitrinoviricota	Alsuviricetes	Martellivirales	Virgaviridae	Tobamovirus	Tobacco mild green mosaic virus	12241	ssRNA(+)	plants	Plants
BC-0302411064|k141_67326.6	BK013732	60.84	Orthornavirae	Lenarviricota	Leviviricetes	Norzivirales	Fiersviridae	Soetuvirus	Soetuvirus lutenecus	2846237	ssRNA(+)	bacteria	Bacteria
BC-0302411064|k141_68864.2	HQ871931	31.63	Orthornavirae	Kitrinoviricota	Magsaviricetes	Nodamuvirales	Sinhaliviridae	Sinaivirus	Lake Sinai virus 1	1041806	ssRNA(+)	invertebrates	Invertebrates
BC-0302411064|k141_81190.3	AJ781168	38.12	Orthornavirae	Pisuviricota	Duplopiviricetes	Durnavirales	Partitiviridae	Alphapartitivirus	Cherry chlorotic rusty spot associated partitivirus	284688	dsRNA	fungi	Fungi
BC-0302411064|k141_81732.5	MN532600	51.19	Orthornavirae	Lenarviricota	Miaviricetes	Ourlivirales	Botourmiaviridae	Magoulivirus	Magoulivirus iotaplasmoparae	2956160	ssRNA(+)	other (specify)	Others
BC-0302411064|k141_913.3	AB033998	82.22	Orthornavirae	Pisuviricota	Stelpaviricetes	Stellavirales	Astroviridae	Avastrovirus	Avastrovirus 2	1239438	ssRNA(+)	vertebrates	Vertebrates	human
BC-0302411065|k141_15500.6	AY616760	55.22	Orthornavirae	Kitrinoviricota	Tolucaviricetes	Tolivirales	Tombusviridae	Alphanecrovirus	Olive mild mosaic virus	295090	ssRNA(+)	plants	Plants
BC-0302411065|k141_19492.5	MN532657	98.26	Orthornavirae	Lenarviricota	Miaviricetes	Ourlivirales	Botourmiaviridae	Scleroulivirus	Scleroulivirus iotaplasmoparae	2956411	ssRNA(+)	other (specify)	Others
BC-0302411065|k141_32304.3	V01408	99.35	Orthornavirae	Kitrinoviricota	Alsuviricetes	Martellivirales	Virgaviridae	Tobamovirus	Tobacco mosaic virus	12242	ssRNA(+)	plants	Plants
BC-0302411065|k141_7603.2	AB569997	64.03	Orthornavirae	Pisuviricota	Duplopiviricetes	Durnavirales	Partitiviridae	Alphapartitivirus	Rosellinia necatrix partitivirus 2	859651	dsRNA	fungi	Fungi
BC-0302411068|k141_26732.5	MN532662	96.43	Orthornavirae	Lenarviricota	Miaviricetes	Ourlivirales	Botourmiaviridae	Scleroulivirus	Scleroulivirus xiplasmoparae	2956422	ssRNA(+)	other (specify)	Others
BC-0302411068|k141_27050.6	KX884002	30.26	Orthornavirae	Negarnaviricota	Chunqiuviricetes	Muvirales	Qinviridae	Yingvirus	Yingvirus wenzhouense	2507503	ssRNA(-)	invertebrates	Invertebrates
BC-0302411068|k141_28808.2	JN117276	69.75	Orthornavirae	Pisuviricota	Duplopiviricetes	Durnavirales	Partitiviridae	Deltapartitivirus	Pepper cryptic virus 1	369643	dsRNA	plants	Plants
BC-0302411068|k141_42852.1	V01408	100	Orthornavirae	Kitrinoviricota	Alsuviricetes	Martellivirales	Virgaviridae	Tobamovirus	Tobacco mosaic virus	12242	ssRNA(+)	plants	Plants
BC-0302411068|k141_8445.5	MN532613	99.15	Orthornavirae	Lenarviricota	Miaviricetes	Ourlivirales	Botourmiaviridae	Magoulivirus	Magoulivirus jiplasmoparae	2956162	ssRNA(+)	other (specify)	Others
BC-0302411068|k141_9815.6	X02986	99.38	Orthornavirae	Kitrinoviricota	Tolucaviricetes	Tolivirales	Tombusviridae	Alphacarmovirus	Carnation mottle virus	11986	ssRNA(+)	plants	Plants
BC-0302411076|k141_14585.3	MG721540	63.48	Orthornavirae	Lenarviricota	Howeltoviricetes	Cryppavirales	Mitoviridae	Duamitovirus	Duamitovirus bevu1	2955768	ssRNA(+)	plants	Plants
BC-0302411076|k141_17246.2	X82547	93.62	Orthornavirae	Kitrinoviricota	Alsuviricetes	Tymovirales	Betaflexiviridae	Capillovirus	Cherry virus A	42882	ssRNA(+)	plants	Plants
BC-0302411076|k141_1777.2	KC811837	29.91	Orthornavirae	Pisuviricota	Pisoniviricetes	Picornavirales	Picornaviridae	Megrivirus	Megrivirus B	2170005	ssRNA(+)	vertebrates	Vertebrates	non_mammalia_vertebrates
BC-0302411076|k141_20133.5	AB569997	54.92	Orthornavirae	Pisuviricota	Duplopiviricetes	Durnavirales	Partitiviridae	Alphapartitivirus	Rosellinia necatrix partitivirus 2	859651	dsRNA	fungi	Fungi
BC-0302411076|k141_2347.4	MG721540	61.95	Orthornavirae	Lenarviricota	Howeltoviricetes	Cryppavirales	Mitoviridae	Duamitovirus	Duamitovirus bevu1	2955768	ssRNA(+)	plants	Plants
BC-0302411076|k141_29073.4	U30944	27.53	Orthornavirae	Kitrinoviricota	Alsuviricetes	Martellivirales	Virgaviridae	Tobamovirus	Youcai mosaic virus	228578	ssRNA(+)	plants	Plants
BC-0302411076|k141_29155.2	FR687854	70.8	Orthornavirae	Pisuviricota	Duplopiviricetes	Durnavirales	Partitiviridae	Deltapartitivirus	Fig cryptic virus	882768	dsRNA	plants	Plants
BC-0302411076|k141_31425.6	MF362666	25.21	Orthornavirae	Kitrinoviricota	Alsuviricetes	Martellivirales	Endornaviridae	Alphaendornavirus	Helianthus annuus alphaendornavirus	2184469	ssRNA(+)	plants	Plants
BC-0302411076|k141_38594.3	AB017503	30.25	Orthornavirae	Kitrinoviricota	Alsuviricetes	Martellivirales	Virgaviridae	Tobamovirus	Wasabi mottle virus	1169032	ssRNA(+)	plants	Plants
BC-0302411076|k141_3940.5	KX884062	42.67	Orthornavirae	Pisuviricota	Duplopiviricetes	Durnavirales	Picobirnaviridae	Orthopicobirnavirus	Orthopicobirnavirus beihaiense	NA	dsRNA	invertebrates	Invertebrates
BC-0302411076|k141_41833.4	AY881628	24.67	Orthornavirae	Kitrinoviricota	Alsuviricetes	Martellivirales	Closteroviridae	Closterovirus	Grapevine leafroll-associated virus 2	64003	ssRNA(+)	plants	Plants
BC-0302411076|k141_42384.3	AB923924	26.45	Orthornavirae	Kitrinoviricota	Alsuviricetes	Martellivirales	Closteroviridae	Olivavirus	Persimmon virus B	1493829	ssRNA(+)	plants	Plants
BC-0302411076|k141_50076.1	AY616760	45.73	Orthornavirae	Kitrinoviricota	Tolucaviricetes	Tolivirales	Tombusviridae	Alphanecrovirus	Olive mild mosaic virus	295090	ssRNA(+)	plants	Plants
BC-0302411076|k141_59568.3	HQ389540	31.22	Orthornavirae	Kitrinoviricota	Alsuviricetes	Martellivirales	Virgaviridae	Tobamovirus	Passion fruit mosaic virus	1032457	ssRNA(+)	plants	Plants
BC-0302411076|k141_59713.3	MK584842	68.97	Orthornavirae	Lenarviricota	Miaviricetes	Ourlivirales	Botourmiaviridae	Botoulivirus	Epicoccum botoulivirus	2844155	ssRNA(+)	fungi	Fungi
BC-0302411076|k141_69401.5	AJ440010	37.29	Orthornavirae	Kitrinoviricota	Alsuviricetes	Martellivirales	Closteroviridae	Olivavirus	Olive leaf yellowing-associated virus	82791	ssRNA(+)	plants	Plants
BC-0302411076|k141_73669.1	AJ781168	38.12	Orthornavirae	Pisuviricota	Duplopiviricetes	Durnavirales	Partitiviridae	Alphapartitivirus	Cherry chlorotic rusty spot associated partitivirus	284688	dsRNA	fungi	Fungi
BC-0302411076|k141_74286.3	JF729471	23.83	Orthornavirae	Kitrinoviricota	Alsuviricetes	Martellivirales	Virgaviridae	Tobamovirus	Rattail cactus necrosis-associated virus	1123754	ssRNA(+)	plants	Plants
BC-0302411076|k141_79015.3	MN532595	63.3	Orthornavirae	Lenarviricota	Miaviricetes	Ourlivirales	Botourmiaviridae	Magoulivirus	Magoulivirus deltaplasmoparae	2956155	ssRNA(+)	other (specify)	Others
BC-0302411076|k141_79831.4	X83964	52.41	Orthornavirae	Kitrinoviricota	Tolucaviricetes	Tolivirales	Tombusviridae	Avenavirus	Oat chlorotic stunt virus	146762	ssRNA	plants	Plants
BC-0302411076|k141_81645.5	MF580384	48.47	Orthornavirae	Kitrinoviricota	Tolucaviricetes	Tolivirales	Tombusviridae	Luteovirus	Apple associated luteovirus	2054409	ssRNA(+)	plants	Plants
BC-0302411076|k141_84583.5	MK584842	60.71	Orthornavirae	Lenarviricota	Miaviricetes	Ourlivirales	Botourmiaviridae	Botoulivirus	Epicoccum botoulivirus	2844155	ssRNA(+)	fungi	Fungi
BC-0302411076|k141_89427.3	V01408	100	Orthornavirae	Kitrinoviricota	Alsuviricetes	Martellivirales	Virgaviridae	Tobamovirus	Tobacco mosaic virus	12242	ssRNA(+)	plants	Plants
BC-0302411076|k141_90009.5	L13218	30.29	Orthornavirae	Duplornaviricota	Chrymotiviricetes	Ghabrivirales	Totiviridae	Giardiavirus	Giardia lamblia virus	29255	dsRNA	protozoa	Others
BC-0302411080|k141_16416.1	M81413	100	Orthornavirae	Kitrinoviricota	Alsuviricetes	Martellivirales	Virgaviridae	Tobamovirus	Pepper mild mottle virus	12239	ssRNA(+)	plants	Plants	human
BC-0302411080|k141_32977.4	JN815251	21.56	Orthornavirae	Pisuviricota	Pisoniviricetes	Picornavirales	Picornaviridae	Enterovirus	Rhinovirus C	463676	ssRNA(+)	vertebrates	Vertebrates	human
BC-0302411080|k141_33916.5	X01572	25.96	Orthornavirae	Kitrinoviricota	Alsuviricetes	Martellivirales	Bromoviridae	Alfamovirus	Alfalfa mosaic virus	12321	ssRNA(+)	plants	Plants
BC-0302411080|k141_3517.1	MN532675	39.15	Orthornavirae	Lenarviricota	Miaviricetes	Ourlivirales	Botourmiaviridae	Penoulivirus	Penoulivirus zetaplasmoparae	2956297	ssRNA(+)	other (specify)	Others
BC-0302411080|k141_35614.4	EU127904	40.38	Orthornavirae	Kitrinoviricota	Tolucaviricetes	Tolivirales	Tombusviridae	Aureusvirus	Cucumber leaf spot virus	165432	ssRNA(+)	plants	Plants
BC-0302411080|k141_46639.1	HQ541738	56.34	Orthornavirae	Negarnaviricota	Ellioviricetes	Bunyavirales	Phenuiviridae	Goukovirus	Gouleako goukovirus	1980547	ssRNA(-)	invertebrates	Invertebrates
BC-0302411080|k141_47450.5	MN532616	51.61	Orthornavirae	Lenarviricota	Miaviricetes	Ourlivirales	Botourmiaviridae	Magoulivirus	Magoulivirus omegaplasmoparae	2956168	ssRNA(+)	other (specify)	Others
BC-0302411080|k141_47450.6	LT593139	60.31	Orthornavirae	Lenarviricota	Miaviricetes	Ourlivirales	Botourmiaviridae	Magoulivirus	Magnaporthe magoulivirus 1	2560575	ssRNA(+)	fungi	Fungi
BC-0302411080|k141_8628.2	Y13463	38.71	Orthornavirae	Kitrinoviricota	Tolucaviricetes	Tolivirales	Tombusviridae	Gallantivirus	Galinsoga mosaic virus	60714	ssRNA(+)	plants	Plants
BC-0302411084|k141_15720.5	KC610514	61.16	Orthornavirae	Duplornaviricota	Chrymotiviricetes	Ghabrivirales	Totiviridae	Totivirus	Scheffersomyces segobiensis virus L	1300323	dsRNA	fungi	Fungi
BC-0302411084|k141_17399.6	M33002	95.71	Orthornavirae	Kitrinoviricota	Tolucaviricetes	Tolivirales	Tombusviridae	Alphanecrovirus	Tobacco necrosis virus A	12055	ssRNA(+)	plants	Plants
BC-0302411084|k141_3956.3	V01408	99	Orthornavirae	Kitrinoviricota	Alsuviricetes	Martellivirales	Virgaviridae	Tobamovirus	Tobacco mosaic virus	12242	ssRNA(+)	plants	Plants
BC-0302411084|k141_8589.5	EU151723	46.5	Orthornavirae	Kitrinoviricota	Tolucaviricetes	Tolivirales	Tombusviridae	Umbravirus	Opium poppy mosaic virus	473784	ssRNA(+)	plants	Plants
BC-0302411096|k141_17026.1	BK010429	54.31	Orthornavirae	Lenarviricota	Howeltoviricetes	Cryppavirales	Mitoviridae	Duamitovirus	Duamitovirus dapi1	2955778	ssRNA(+)	plants	Plants
BC-0302411096|k141_17704.1	MK507958	29.38	Orthornavirae	Lenarviricota	Miaviricetes	Ourlivirales	Botourmiaviridae	Penoulivirus	Magnaporthe penoulivirus	2845557	ssRNA(+)	fungi	Fungi
BC-0302411096|k141_18500.2	BK010429	52.17	Orthornavirae	Lenarviricota	Howeltoviricetes	Cryppavirales	Mitoviridae	Duamitovirus	Duamitovirus dapi1	2955778	ssRNA(+)	plants	Plants
BC-0302411097|k141_22319.3	MN532644	52.34	Orthornavirae	Lenarviricota	Miaviricetes	Ourlivirales	Botourmiaviridae	Botoulivirus	Botoulivirus gammaplasmoparae	2955527	ssRNA(+)	other (specify)	Others
BC-0302411097|k141_26091.5	BK010429	54.39	Orthornavirae	Lenarviricota	Howeltoviricetes	Cryppavirales	Mitoviridae	Duamitovirus	Duamitovirus dapi1	2955778	ssRNA(+)	plants	Plants
BC-0302411097|k141_35380.3	AB973945	47.47	Orthornavirae	Pisuviricota	Pisoniviricetes	Picornavirales	Marnaviridae	Kusarnavirus	Astarnavirus	2560308	ssRNA(+)	algae	Algae
BC-0302411097|k141_49002.2	MN605477	77.88	Orthornavirae	Lenarviricota	Miaviricetes	Ourlivirales	Botourmiaviridae	Botoulivirus	Botoulivirus betabotrytidis	2955518	ssRNA(+)	fungi	Fungi
BC-0302411097|k141_50468.2	BK010429	51.3	Orthornavirae	Lenarviricota	Howeltoviricetes	Cryppavirales	Mitoviridae	Duamitovirus	Duamitovirus dapi1	2955778	ssRNA(+)	plants	Plants
BC-0302411097|k141_63696.3	MN532646	63.16	Orthornavirae	Lenarviricota	Miaviricetes	Ourlivirales	Botourmiaviridae	Botoulivirus	Botoulivirus epsilonplasmoparae	2955523	ssRNA(+)	other (specify)	Others
BC-0302411097|k141_68136.2	MF362666	66.97	Orthornavirae	Kitrinoviricota	Alsuviricetes	Martellivirales	Endornaviridae	Alphaendornavirus	Helianthus annuus alphaendornavirus	2184469	ssRNA(+)	plants	Plants
BC-0302411097|k141_68161.5	V01408	100	Orthornavirae	Kitrinoviricota	Alsuviricetes	Martellivirales	Virgaviridae	Tobamovirus	Tobacco mosaic virus	12242	ssRNA(+)	plants	Plants
BC-0302411097|k141_68478.5	X02986	99.11	Orthornavirae	Kitrinoviricota	Tolucaviricetes	Tolivirales	Tombusviridae	Alphacarmovirus	Carnation mottle virus	11986	ssRNA(+)	plants	Plants
BC-0302411104|k141_10411.1	LC413501	27.92	Orthornavirae	Lenarviricota	Miaviricetes	Ourlivirales	Botourmiaviridae	Penoulivirus	Pyricularia penoulivirus	2846014	ssRNA(+)	fungi	Fungi
BC-0302411104|k141_23932.6	BK014117	59.24	Orthornavirae	Lenarviricota	Leviviricetes	Timlovirales	Steitzviridae	Alehxovirus	Alehxovirus asiovicinum	2843664	ssRNA(+)	bacteria	Bacteria
BC-0302411104|k141_27291.5	V01408	100	Orthornavirae	Kitrinoviricota	Alsuviricetes	Martellivirales	Virgaviridae	Tobamovirus	Tobacco mosaic virus	12242	ssRNA(+)	plants	Plants
BC-0302411104|k141_31922.6	X85989	44.51	Orthornavirae	Kitrinoviricota	Tolucaviricetes	Tolivirales	Tombusviridae	Alphanecrovirus	Olive latent virus 1	47669	ssRNA(+)	plants	Plants
BC-0302411104|k141_3221.1	MN605476	76.35	Orthornavirae	Lenarviricota	Miaviricetes	Ourlivirales	Botourmiaviridae	Betascleroulivirus	Betascleroulivirus botrytidis	2955479	ssRNA(+)	fungi	Fungi
BC-0302411104|k141_36708.6	AF329080	95.68	Orthornavirae	Kitrinoviricota	Magsaviricetes	Nodamuvirales	Nodaviridae	Alphanodavirus	Boolarra virus	12286	ssRNA(+)	invertebrates	Invertebrates
BC-0302411104|k141_39320.3	X83964	56.02	Orthornavirae	Kitrinoviricota	Tolucaviricetes	Tolivirales	Tombusviridae	Avenavirus	Oat chlorotic stunt virus	146762	ssRNA	plants	Plants
BC-0302411104|k141_46137.3	D86123	35.03	Orthornavirae	Kitrinoviricota	Tolucaviricetes	Tolivirales	Tombusviridae	Betacarmovirus	Japanese iris necrotic ring virus	77344	ssRNA(+)	plants	Plants
BC-0302411104|k141_51444.3	MN532677	86.73	Orthornavirae	Lenarviricota	Miaviricetes	Ourlivirales	Botourmiaviridae	Penoulivirus	Penoulivirus thetaplasmoparae	2956296	ssRNA(+)	other (specify)	Others
BC-0302411104|k141_53162.1	KC610514	61.16	Orthornavirae	Duplornaviricota	Chrymotiviricetes	Ghabrivirales	Totiviridae	Totivirus	Scheffersomyces segobiensis virus L	1300323	dsRNA	fungi	Fungi
BC-0302411104|k141_64771.2	MT353902	58.28	Orthornavirae	Negarnaviricota	Ellioviricetes	Bunyavirales	Phenuiviridae	Laulavirus	Grapevine laulavirus 4	2844686	ssRNA(-)	fungi	Fungi
BC-0302411104|k141_67054.1	BK013576	55.17	Orthornavirae	Lenarviricota	Leviviricetes	Timlovirales	Steitzviridae	Chorovirus	Chorovirus peladaptatum	2843945	ssRNA(+)	bacteria	Bacteria
BC-0302411104|k141_67992.5	HQ389540	28.28	Orthornavirae	Kitrinoviricota	Alsuviricetes	Martellivirales	Virgaviridae	Tobamovirus	Passion fruit mosaic virus	1032457	ssRNA(+)	plants	Plants
BC-0302411223|k141_1001.6	MG721540	61.95	Orthornavirae	Lenarviricota	Howeltoviricetes	Cryppavirales	Mitoviridae	Duamitovirus	Duamitovirus bevu1	2955768	ssRNA(+)	plants	Plants
BC-0302411223|k141_14411.6	X01678	100	Orthornavirae	Kitrinoviricota	Alsuviricetes	Martellivirales	Bromoviridae	Bromovirus	Brome mosaic virus	12302	ssRNA(+)	plants	Plants
BC-0302411223|k141_14940.5	HQ389540	31.22	Orthornavirae	Kitrinoviricota	Alsuviricetes	Martellivirales	Virgaviridae	Tobamovirus	Passion fruit mosaic virus	1032457	ssRNA(+)	plants	Plants
BC-0302411223|k141_1635.5	KT823701	29.13	Orthornavirae	Kitrinoviricota	Alsuviricetes	Martellivirales	Endornaviridae	Alphaendornavirus	Rhizoctonia solani alphaendornavirus 2	2734348	ssRNA(+)	fungi	Fungi
BC-0302411223|k141_3323.4	AB113347	52.59	Orthornavirae	Pisuviricota	Duplopiviricetes	Durnavirales	Partitiviridae	Betapartitivirus	Rosellinia necatrix virus 1	674984	dsRNA	fungi	Fungi
BC-0302411223|k141_7665.2	AJ295948	29.14	Orthornavirae	Kitrinoviricota	Alsuviricetes	Martellivirales	Virgaviridae	Tobamovirus	Kyuri green mottle mosaic virus	111970	ssRNA(+)	plants	Plants
BC-0302411223|k141_808.1	MN532661	60.16	Orthornavirae	Lenarviricota	Miaviricetes	Ourlivirales	Botourmiaviridae	Scleroulivirus	Scleroulivirus niplasmoparae	2956415	ssRNA(+)	other (specify)	Others
BC-0302411223|k141_8599.3	AF171942	41.82	Orthornavirae	Kitrinoviricota	Magsaviricetes	Nodamuvirales	Nodaviridae	Alphanodavirus	Pariacoto virus	103782	ssRNA(+)	invertebrates	Invertebrates
BC-0302411266|k141_103127.2	X02986	100	Orthornavirae	Kitrinoviricota	Tolucaviricetes	Tolivirales	Tombusviridae	Alphacarmovirus	Carnation mottle virus	11986	ssRNA(+)	plants	Plants
BC-0302411266|k141_111541.2	KX884002	30.26	Orthornavirae	Negarnaviricota	Chunqiuviricetes	Muvirales	Qinviridae	Yingvirus	Yingvirus wenzhouense	2507503	ssRNA(-)	invertebrates	Invertebrates
BC-0302411266|k141_112034.3	KT598226	35.08	Orthornavirae	Kitrinoviricota	Alsuviricetes	Tymovirales	Deltaflexiviridae	Deltaflexivirus	Soybean-associated deltaflexivirus 1	2169866	ssRNA(+)	plants	Plants
BC-0302411266|k141_123822.1	JN566124	28.08	Orthornavirae	Kitrinoviricota	Alsuviricetes	Martellivirales	Virgaviridae	Tobamovirus	Clitoria yellow mottle virus	1128119	ssRNA(+)	plants	Plants
BC-0302411266|k141_125639.4	J04357	41.88	Orthornavirae	Kitrinoviricota	Tolucaviricetes	Tolivirales	Tombusviridae	Dianthovirus	Red clover necrotic mosaic virus	12267	ssRNA(+)	plants	Plants
BC-0302411266|k141_126942.1	MG721540	62.5	Orthornavirae	Lenarviricota	Howeltoviricetes	Cryppavirales	Mitoviridae	Duamitovirus	Duamitovirus bevu1	2955768	ssRNA(+)	plants	Plants
BC-0302411266|k141_14491.2	AJ295948	29.5	Orthornavirae	Kitrinoviricota	Alsuviricetes	Martellivirales	Virgaviridae	Tobamovirus	Kyuri green mottle mosaic virus	111970	ssRNA(+)	plants	Plants
BC-0302411266|k141_28116.1	JN117276	69.75	Orthornavirae	Pisuviricota	Duplopiviricetes	Durnavirales	Partitiviridae	Deltapartitivirus	Pepper cryptic virus 1	369643	dsRNA	plants	Plants
BC-0302411266|k141_3302.5	MN532595	64.22	Orthornavirae	Lenarviricota	Miaviricetes	Ourlivirales	Botourmiaviridae	Magoulivirus	Magoulivirus deltaplasmoparae	2956155	ssRNA(+)	other (specify)	Others
BC-0302411266|k141_44035.2	BK010429	55.17	Orthornavirae	Lenarviricota	Howeltoviricetes	Cryppavirales	Mitoviridae	Duamitovirus	Duamitovirus dapi1	2955778	ssRNA(+)	plants	Plants
BC-0302411266|k141_49292.1	AY303787	77.45	Orthornavirae	Pisuviricota	Pisoniviricetes	Picornavirales	Secoviridae	Nepovirus	Raspberry ringspot virus	12809	ssRNA(+)	plants	Plants
BC-0302411266|k141_50430.5	FR687854	70.8	Orthornavirae	Pisuviricota	Duplopiviricetes	Durnavirales	Partitiviridae	Deltapartitivirus	Fig cryptic virus	882768	dsRNA	plants	Plants
BC-0302411266|k141_55919.4	BK010429	57.02	Orthornavirae	Lenarviricota	Howeltoviricetes	Cryppavirales	Mitoviridae	Duamitovirus	Duamitovirus dapi1	2955778	ssRNA(+)	plants	Plants
BC-0302411266|k141_55960.2	BK010429	53.91	Orthornavirae	Lenarviricota	Howeltoviricetes	Cryppavirales	Mitoviridae	Duamitovirus	Duamitovirus dapi1	2955778	ssRNA(+)	plants	Plants
BC-0302411266|k141_79764.6	MN532609	66.67	Orthornavirae	Lenarviricota	Miaviricetes	Ourlivirales	Botourmiaviridae	Magoulivirus	Magoulivirus sigmaplasmoparae	2956173	ssRNA(+)	other (specify)	Others
BC-0302411266|k141_79952.5	AJ295948	27.86	Orthornavirae	Kitrinoviricota	Alsuviricetes	Martellivirales	Virgaviridae	Tobamovirus	Kyuri green mottle mosaic virus	111970	ssRNA(+)	plants	Plants
BC-0302411266|k141_81517.6	KF412901	31.95	Orthornavirae	Pisuviricota	Pisoniviricetes	Picornavirales	Marnaviridae	Locarnavirus	Sanfarnavirus 2	2560739	ssRNA(+)	marine (S)	Others
BC-0302411266|k141_8874.6	X83964	53.94	Orthornavirae	Kitrinoviricota	Tolucaviricetes	Tolivirales	Tombusviridae	Avenavirus	Oat chlorotic stunt virus	146762	ssRNA	plants	Plants
BC-0302411266|k141_94785.2	MN532662	96.58	Orthornavirae	Lenarviricota	Miaviricetes	Ourlivirales	Botourmiaviridae	Scleroulivirus	Scleroulivirus xiplasmoparae	2956422	ssRNA(+)	other (specify)	Others
BC-0302411266|k141_95991.3	EU770623	40	Orthornavirae	Lenarviricota	Miaviricetes	Ourlivirales	Botourmiaviridae	Ourmiavirus	Ourmia melon virus	186786	ssRNA(+)	plants	Plants
BC-0302411294|k141_101629.5	V01408	100	Orthornavirae	Kitrinoviricota	Alsuviricetes	Martellivirales	Virgaviridae	Tobamovirus	Tobacco mosaic virus	12242	ssRNA(+)	plants	Plants
BC-0302411294|k141_18243.3	HQ667979	100	Orthornavirae	Kitrinoviricota	Alsuviricetes	Martellivirales	Virgaviridae	Tobamovirus	Ribgrass mosaic virus	51680	ssRNA(+)	plants	Plants
BC-0302411294|k141_26953.6	X83964	54.54	Orthornavirae	Kitrinoviricota	Tolucaviricetes	Tolivirales	Tombusviridae	Avenavirus	Oat chlorotic stunt virus	146762	ssRNA	plants	Plants
BC-0302411294|k141_29008.6	JX123318	30.62	Orthornavirae	Pisuviricota	Pisoniviricetes	Sobelivirales	Solemoviridae	Sobemovirus	Papaya lethal yellowing virus	685899	ssRNA(+)	plants	Plants
BC-0302411294|k141_43745.6	MN473199	72.73	Orthornavirae	Lenarviricota	Miaviricetes	Ourlivirales	Botourmiaviridae	Penoulivirus	Phoma penoulivirus	2845834	ssRNA(+)	fungi	Fungi
BC-0302411294|k141_44671.6	X83964	52.73	Orthornavirae	Kitrinoviricota	Tolucaviricetes	Tolivirales	Tombusviridae	Avenavirus	Oat chlorotic stunt virus	146762	ssRNA	plants	Plants
BC-0302411294|k141_49006.5	FR687854	70.8	Orthornavirae	Pisuviricota	Duplopiviricetes	Durnavirales	Partitiviridae	Deltapartitivirus	Fig cryptic virus	882768	dsRNA	plants	Plants
BC-0302411294|k141_55907.3	BK013993	56.33	Orthornavirae	Lenarviricota	Leviviricetes	Timlovirales	Steitzviridae	Lehptavirus	Lehptavirus agrihabitans	2845485	ssRNA(+)	bacteria	Bacteria
BC-0302411294|k141_56233.3	X02986	100	Orthornavirae	Kitrinoviricota	Tolucaviricetes	Tolivirales	Tombusviridae	Alphacarmovirus	Carnation mottle virus	11986	ssRNA(+)	plants	Plants
BC-0302411294|k141_64441.1	Z69910	45.86	Orthornavirae	Kitrinoviricota	Tolucaviricetes	Tolivirales	Tombusviridae	Umbravirus	Groundnut rosette virus	47740	ssRNA(+)	plants	Plants
BC-0302411294|k141_64701.3	AB733585	44.67	Orthornavirae	Kitrinoviricota	Alsuviricetes	Martellivirales	Closteroviridae	Bluvavirus	Blueberry virus A	1206566	ssRNA(+)	plants	Plants
BC-0302411294|k141_73531.5	V01408	99.35	Orthornavirae	Kitrinoviricota	Alsuviricetes	Martellivirales	Virgaviridae	Tobamovirus	Tobacco mosaic virus	12242	ssRNA(+)	plants	Plants
BC-0302411294|k141_74546.4	KT598226	34.88	Orthornavirae	Kitrinoviricota	Alsuviricetes	Tymovirales	Deltaflexiviridae	Deltaflexivirus	Soybean-associated deltaflexivirus 1	2169866	ssRNA(+)	plants	Plants
BC-0302411294|k141_78102.3	MN532613	100	Orthornavirae	Lenarviricota	Miaviricetes	Ourlivirales	Botourmiaviridae	Magoulivirus	Magoulivirus jiplasmoparae	2956162	ssRNA(+)	other (specify)	Others
BC-0302411294|k141_81646.2	BK014012	59.24	Orthornavirae	Lenarviricota	Leviviricetes	Timlovirales	Steitzviridae	Gredihovirus	Gredihovirus arvadaptatum	2844695	ssRNA(+)	bacteria	Bacteria
BC-0302411294|k141_82291.4	MN532604	77.32	Orthornavirae	Lenarviricota	Miaviricetes	Ourlivirales	Botourmiaviridae	Magoulivirus	Magoulivirus niplasmoparae	2956167	ssRNA(+)	other (specify)	Others
BC-0302411294|k141_97370.5	EU770623	62.33	Orthornavirae	Lenarviricota	Miaviricetes	Ourlivirales	Botourmiaviridae	Ourmiavirus	Ourmia melon virus	186786	ssRNA(+)	plants	Plants
BC-0302411302|k141_11508.1	AF484251	93.66	Orthornavirae	Kitrinoviricota	Alsuviricetes	Tymovirales	Alphaflexiviridae	Potexvirus	Pepino mosaic virus	112229	ssRNA(+)	plants	Plants
BC-0302411302|k141_11837.1	MN532612	100	Orthornavirae	Lenarviricota	Miaviricetes	Ourlivirales	Botourmiaviridae	Magoulivirus	Magoulivirus fiplasmoparae	2956158	ssRNA(+)	other (specify)	Others
BC-0302411302|k141_15544.2	MN532613	100	Orthornavirae	Lenarviricota	Miaviricetes	Ourlivirales	Botourmiaviridae	Magoulivirus	Magoulivirus jiplasmoparae	2956162	ssRNA(+)	other (specify)	Others
BC-0302411302|k141_15713.3	M33002	95.71	Orthornavirae	Kitrinoviricota	Tolucaviricetes	Tolivirales	Tombusviridae	Alphanecrovirus	Tobacco necrosis virus A	12055	ssRNA(+)	plants	Plants
BC-0302411302|k141_17786.6	MN532662	95.54	Orthornavirae	Lenarviricota	Miaviricetes	Ourlivirales	Botourmiaviridae	Scleroulivirus	Scleroulivirus xiplasmoparae	2956422	ssRNA(+)	other (specify)	Others
BC-0302411302|k141_21999.3	AJ295949	29.65	Orthornavirae	Kitrinoviricota	Alsuviricetes	Martellivirales	Virgaviridae	Tobamovirus	Zucchini green mottle mosaic virus	111418	ssRNA(+)	plants	Plants
BC-0302411302|k141_22713.1	MN532590	77.78	Orthornavirae	Lenarviricota	Miaviricetes	Ourlivirales	Botourmiaviridae	Botoulivirus	Botoulivirus alphaplasmoparae	2955517	ssRNA(+)	other (specify)	Others
BC-0302411302|k141_23353.3	JN700748	45.83	Orthornavirae	Kitrinoviricota	Tolucaviricetes	Tolivirales	Tombusviridae	Tombusvirus	Moroccan pepper virus	208086	ssRNA(+)	plants	Plants
BC-0302411302|k141_23822.5	MN473199	72.81	Orthornavirae	Lenarviricota	Miaviricetes	Ourlivirales	Botourmiaviridae	Penoulivirus	Phoma penoulivirus	2845834	ssRNA(+)	fungi	Fungi
BC-0302411302|k141_31275.6	MN532666	88.03	Orthornavirae	Lenarviricota	Miaviricetes	Ourlivirales	Botourmiaviridae	Scleroulivirus	Scleroulivirus sigmaplasmoparae	2956420	ssRNA(+)	other (specify)	Others
BC-0302411302|k141_31543.6	V01408	100	Orthornavirae	Kitrinoviricota	Alsuviricetes	Martellivirales	Virgaviridae	Tobamovirus	Tobacco mosaic virus	12242	ssRNA(+)	plants	Plants
BC-0302411302|k141_36348.1	EU151723	46.5	Orthornavirae	Kitrinoviricota	Tolucaviricetes	Tolivirales	Tombusviridae	Umbravirus	Opium poppy mosaic virus	473784	ssRNA(+)	plants	Plants
BC-0302411302|k141_41792.1	KC610514	60.33	Orthornavirae	Duplornaviricota	Chrymotiviricetes	Ghabrivirales	Totiviridae	Totivirus	Scheffersomyces segobiensis virus L	1300323	dsRNA	fungi	Fungi
BC-0302411302|k141_6950.6	KC610514	60.33	Orthornavirae	Duplornaviricota	Chrymotiviricetes	Ghabrivirales	Totiviridae	Totivirus	Scheffersomyces segobiensis virus L	1300323	dsRNA	fungi	Fungi
BC-0302411303|k141_27496.6	V01408	99.35	Orthornavirae	Kitrinoviricota	Alsuviricetes	Martellivirales	Virgaviridae	Tobamovirus	Tobacco mosaic virus	12242	ssRNA(+)	plants	Plants
BC-0302411303|k141_3665.1	MG721540	61.95	Orthornavirae	Lenarviricota	Howeltoviricetes	Cryppavirales	Mitoviridae	Duamitovirus	Duamitovirus bevu1	2955768	ssRNA(+)	plants	Plants
BC-0302411310|k141_12186.2	BK014054	60.28	Orthornavirae	Lenarviricota	Leviviricetes	Norzivirales	Fiersviridae	Keghovirus	Keghovirus borborovivens	2845044	ssRNA(+)	bacteria	Bacteria
BC-0302411310|k141_18062.2	MN532658	64.42	Orthornavirae	Lenarviricota	Miaviricetes	Ourlivirales	Botourmiaviridae	Scleroulivirus	Scleroulivirus kappaplasmoparae	2956412	ssRNA(+)	other (specify)	Others
BC-0302411310|k141_18587.1	V01408	100	Orthornavirae	Kitrinoviricota	Alsuviricetes	Martellivirales	Virgaviridae	Tobamovirus	Tobacco mosaic virus	12242	ssRNA(+)	plants	Plants
BC-0302411310|k141_9280.4	KP900921	60	Orthornavirae	Lenarviricota	Miaviricetes	Ourlivirales	Botourmiaviridae	Magoulivirus	Rhizoctonia magoulivirus 1	2560704	ssRNA(+)	fungi	Fungi
BC-0302411344|k141_15843.6	KJ950914	40.74	Orthornavirae	Kitrinoviricota	Flasuviricetes	Amarillovirales	Flaviviridae	Pestivirus	Pestivirus J	2170089	ssRNA(+)	vertebrates	Vertebrates	non_human_mammalia
BC-0302411344|k141_18529.1	AF484251	99.3	Orthornavirae	Kitrinoviricota	Alsuviricetes	Tymovirales	Alphaflexiviridae	Potexvirus	Pepino mosaic virus	112229	ssRNA(+)	plants	Plants
BC-0302411344|k141_26372.3	MK372907	35.78	Orthornavirae	Lenarviricota	Miaviricetes	Ourlivirales	Botourmiaviridae	Rhizoulivirus	Rhizoulivirus betarhizoctoniae	2956369	ssRNA(+)	fungi	Fungi
BC-0302411344|k141_27893.4	V01408	100	Orthornavirae	Kitrinoviricota	Alsuviricetes	Martellivirales	Virgaviridae	Tobamovirus	Tobacco mosaic virus	12242	ssRNA(+)	plants	Plants
BC-0302411344|k141_9562.3	AF484251	93.66	Orthornavirae	Kitrinoviricota	Alsuviricetes	Tymovirales	Alphaflexiviridae	Potexvirus	Pepino mosaic virus	112229	ssRNA(+)	plants	Plants
BC-0302411445|k141_16166.4	MN532613	98.31	Orthornavirae	Lenarviricota	Miaviricetes	Ourlivirales	Botourmiaviridae	Magoulivirus	Magoulivirus jiplasmoparae	2956162	ssRNA(+)	other (specify)	Others
BC-0302411445|k141_16446.2	EU854568	34.15	Orthornavirae	Pisuviricota	Pisoniviricetes	Picornavirales	Picornaviridae	Parechovirus	Parechovirus B	1803957	ssRNA(+)	vertebrates	Vertebrates	human
BC-0302411445|k141_17463.2	MN605476	66.89	Orthornavirae	Lenarviricota	Miaviricetes	Ourlivirales	Botourmiaviridae	Betascleroulivirus	Betascleroulivirus botrytidis	2955479	ssRNA(+)	fungi	Fungi
BC-0302411445|k141_22143.3	V01408	100	Orthornavirae	Kitrinoviricota	Alsuviricetes	Martellivirales	Virgaviridae	Tobamovirus	Tobacco mosaic virus	12242	ssRNA(+)	plants	Plants
BC-0302411445|k141_23207.5	MN532646	56.3	Orthornavirae	Lenarviricota	Miaviricetes	Ourlivirales	Botourmiaviridae	Botoulivirus	Botoulivirus epsilonplasmoparae	2955523	ssRNA(+)	other (specify)	Others
BC-0302411445|k141_4852.2	MN386962	36.74	Orthornavirae	Lenarviricota	Miaviricetes	Ourlivirales	Botourmiaviridae	Penoulivirus	Penoulivirus malus	2956295	ssRNA(+)	plants	Plants
BC-0302411445|k141_6414.3	MN532604	57.76	Orthornavirae	Lenarviricota	Miaviricetes	Ourlivirales	Botourmiaviridae	Magoulivirus	Magoulivirus niplasmoparae	2956167	ssRNA(+)	other (specify)	Others
BC-0302411445|k141_772.3	KR080326	24.73	Orthornavirae	Kitrinoviricota	Alsuviricetes	Martellivirales	Endornaviridae	Alphaendornavirus	Hot pepper alphaendornavirus	1711684	ssRNA(+)	plants	Plants
BC-0302411522|k141_10576.1	MN532643	95.8	Orthornavirae	Lenarviricota	Miaviricetes	Ourlivirales	Botourmiaviridae	Botoulivirus	Botoulivirus betaplasmoparae	2955519	ssRNA(+)	other (specify)	Others
BC-0302411522|k141_11035.1	MN532590	89.65	Orthornavirae	Lenarviricota	Miaviricetes	Ourlivirales	Botourmiaviridae	Botoulivirus	Botoulivirus alphaplasmoparae	2955517	ssRNA(+)	other (specify)	Others
BC-0302411522|k141_17225.3	MN532624	67.7	Orthornavirae	Lenarviricota	Miaviricetes	Ourlivirales	Botourmiaviridae	Betascleroulivirus	Betascleroulivirus gammaplasmoparae	2955483	ssRNA(+)	other (specify)	Others
BC-0302411522|k141_17350.1	MN532627	65.54	Orthornavirae	Lenarviricota	Miaviricetes	Ourlivirales	Botourmiaviridae	Betascleroulivirus	Betascleroulivirus zetaplasmoparae	2955489	ssRNA(+)	other (specify)	Others
BC-0302411522|k141_2216.3	EU770623	34.46	Orthornavirae	Lenarviricota	Miaviricetes	Ourlivirales	Botourmiaviridae	Ourmiavirus	Ourmia melon virus	186786	ssRNA(+)	plants	Plants
BC-0302411522|k141_604.3	EU770623	33.33	Orthornavirae	Lenarviricota	Miaviricetes	Ourlivirales	Botourmiaviridae	Ourmiavirus	Ourmia melon virus	186786	ssRNA(+)	plants	Plants
BC-0302411522|k141_8484.4	AY089993	79.65	Orthornavirae	Pisuviricota	Duplopiviricetes	Durnavirales	Partitiviridae	Gammapartitivirus	Gremmeniella abietina RNA virus MS1	191436	dsRNA	fungi	Fungi
BC-0302411552|k141_102973.2	L07884	34.58	Orthornavirae	Kitrinoviricota	Tolucaviricetes	Tolivirales	Tombusviridae	Dianthovirus	Sweet clover necrotic mosaic virus	28348	ssRNA(+)	plants	Plants
BC-0302411552|k141_104751.4	MG721540	61.95	Orthornavirae	Lenarviricota	Howeltoviricetes	Cryppavirales	Mitoviridae	Duamitovirus	Duamitovirus bevu1	2955768	ssRNA(+)	plants	Plants
BC-0302411552|k141_107563.1	X06728	100	Orthornavirae	Kitrinoviricota	Alsuviricetes	Tymovirales	Alphaflexiviridae	Potexvirus	White clover mosaic virus	12188	ssRNA(+)	plants	Plants
BC-0302411552|k141_109899.5	MK682518	35.05	Orthornavirae	Lenarviricota	Howeltoviricetes	Cryppavirales	Mitoviridae	Unuamitovirus	Unuamitovirus enmu6	2956598	ssRNA(+)	fungi	Fungi
BC-0302411552|k141_11073.3	AJ295949	29.37	Orthornavirae	Kitrinoviricota	Alsuviricetes	Martellivirales	Virgaviridae	Tobamovirus	Zucchini green mottle mosaic virus	111418	ssRNA(+)	plants	Plants
BC-0302411552|k141_112726.3	MN715322	58.82	Orthornavirae	Lenarviricota	Miaviricetes	Ourlivirales	Botourmiaviridae	Penoulivirus	Sclerotinia penoulivirus	2846164	ssRNA(+)	fungi	Fungi
BC-0302411552|k141_11854.6	MG721540	58.76	Orthornavirae	Lenarviricota	Howeltoviricetes	Cryppavirales	Mitoviridae	Duamitovirus	Duamitovirus bevu1	2955768	ssRNA(+)	plants	Plants
BC-0302411552|k141_14596.5	V01408	100	Orthornavirae	Kitrinoviricota	Alsuviricetes	Martellivirales	Virgaviridae	Tobamovirus	Tobacco mosaic virus	12242	ssRNA(+)	plants	Plants
BC-0302411552|k141_26099.3	S51557	27.66	Orthornavirae	Kitrinoviricota	Alsuviricetes	Martellivirales	Mayoviridae	Idaeovirus	Idaeovirus rubi	2955987	ssRNA(+)	plants	Plants
BC-0302411552|k141_26684.3	BK010429	54.31	Orthornavirae	Lenarviricota	Howeltoviricetes	Cryppavirales	Mitoviridae	Duamitovirus	Duamitovirus dapi1	2955778	ssRNA(+)	plants	Plants
BC-0302411552|k141_28483.5	MN532663	69.23	Orthornavirae	Lenarviricota	Miaviricetes	Ourlivirales	Botourmiaviridae	Scleroulivirus	Scleroulivirus omicronplasmoparae	2956417	ssRNA(+)	other (specify)	Others
BC-0302411552|k141_29503.1	BK010429	53.04	Orthornavirae	Lenarviricota	Howeltoviricetes	Cryppavirales	Mitoviridae	Duamitovirus	Duamitovirus dapi1	2955778	ssRNA(+)	plants	Plants
BC-0302411552|k141_31498.5	MK728654	23	Orthornavirae	Negarnaviricota	Ellioviricetes	Bunyavirales	Phenuiviridae	Rubodvirus	Grapevine rubodvirus 2	2844688	ssRNA(-)	plants	Plants
BC-0302411552|k141_33422.2	EF375551	98.05	Orthornavirae	Kitrinoviricota	Alsuviricetes	Martellivirales	Virgaviridae	Tobamovirus	Rehmannia mosaic virus	425279	ssRNA(+)	plants	Plants
BC-0302411552|k141_44713.2	FR687854	70.8	Orthornavirae	Pisuviricota	Duplopiviricetes	Durnavirales	Partitiviridae	Deltapartitivirus	Fig cryptic virus	882768	dsRNA	plants	Plants
BC-0302411552|k141_49819.2	EU980442	37.97	Orthornavirae	Pisuviricota	Pisoniviricetes	Picornavirales	Secoviridae	Sequivirus	Carrot necrotic dieback virus	680112	ssRNA(+)	plants	Plants
BC-0302411552|k141_53810.4	D86123	34.76	Orthornavirae	Kitrinoviricota	Tolucaviricetes	Tolivirales	Tombusviridae	Betacarmovirus	Japanese iris necrotic ring virus	77344	ssRNA(+)	plants	Plants
BC-0302411552|k141_54758.6	AY613852	29.3	Orthornavirae	Kitrinoviricota	Tolucaviricetes	Tolivirales	Tombusviridae	Pelarspovirus	Pelargonium line pattern virus	167019	ssRNA(+)	plants	Plants
BC-0302411552|k141_60328.3	MN532662	68.38	Orthornavirae	Lenarviricota	Miaviricetes	Ourlivirales	Botourmiaviridae	Scleroulivirus	Scleroulivirus xiplasmoparae	2956422	ssRNA(+)	other (specify)	Others
BC-0302411552|k141_61304.4	X82547	93.62	Orthornavirae	Kitrinoviricota	Alsuviricetes	Tymovirales	Betaflexiviridae	Capillovirus	Cherry virus A	42882	ssRNA(+)	plants	Plants
BC-0302411552|k141_73515.3	MN532589	78.54	Orthornavirae	Lenarviricota	Miaviricetes	Ourlivirales	Botourmiaviridae	Betabotoulivirus	Betabotoulivirus betaplasmoparae	2955433	ssRNA(+)	other (specify)	Others
BC-0302411552|k141_7822.1	MT062430	59.09	Orthornavirae	Lenarviricota	Miaviricetes	Ourlivirales	Botourmiaviridae	Magoulivirus	Magoulivirus betamacrophominae	2956153	ssRNA(+)	fungi	Fungi
BC-0302411552|k141_80613.5	MN532669	65.79	Orthornavirae	Lenarviricota	Miaviricetes	Ourlivirales	Botourmiaviridae	Penoulivirus	Penoulivirus alphaplasmoparae	2956285	ssRNA(+)	other (specify)	Others
BC-0302411552|k141_81599.6	MN701059	37.5	Orthornavirae	Pisuviricota	Pisoniviricetes	Picornavirales	Secoviridae	Waikavirus	Waikavirus BCWVA	2956674	ssRNA(+)	plants	Plants
BC-0302411552|k141_95112.1	V01408	100	Orthornavirae	Kitrinoviricota	Alsuviricetes	Martellivirales	Virgaviridae	Tobamovirus	Tobacco mosaic virus	12242	ssRNA(+)	plants	Plants
BC-0302411552|k141_96141.1	MK584843	100	Orthornavirae	Lenarviricota	Miaviricetes	Ourlivirales	Botourmiaviridae	Penoulivirus	Phaeoacremonium penoulivirus	2845807	ssRNA(+)	fungi	Fungi
BC-0302411552|k141_9693.6	KP901095	42.77	Orthornavirae	Kitrinoviricota	Tolucaviricetes	Tolivirales	Tombusviridae	Alphanecrovirus	Potato necrosis virus	1725329	ssRNA(+)	plants	Plants
BC-0302411554|k141_16563.1	V01408	100	Orthornavirae	Kitrinoviricota	Alsuviricetes	Martellivirales	Virgaviridae	Tobamovirus	Tobacco mosaic virus	12242	ssRNA(+)	plants	Plants
BC-0302411554|k141_6710.3	BK014101	57.86	Orthornavirae	Lenarviricota	Leviviricetes	Norzivirales	Fiersviridae	Lohmavirus	Lohmavirus borborovivens	2845531	ssRNA(+)	bacteria	Bacteria
BC-0302411570|k141_12327.6	AY535016	31.98	Orthornavirae	Negarnaviricota	Milneviricetes	Serpentovirales	Aspiviridae	Ophiovirus	Ophiovirus lactucae	2170047	ssRNA(-)	plants	Plants
BC-0302411570|k141_12901.1	JN117278	99.38	Orthornavirae	Pisuviricota	Duplopiviricetes	Durnavirales	Partitiviridae	Deltapartitivirus	Pepper cryptic virus 2	1050903	dsRNA	plants	Plants
BC-0302411570|k141_20806.4	JN117276	70.18	Orthornavirae	Pisuviricota	Duplopiviricetes	Durnavirales	Partitiviridae	Deltapartitivirus	Pepper cryptic virus 1	369643	dsRNA	plants	Plants
BC-0302411570|k141_37254.2	KU187189	99.03	Orthornavirae	Kitrinoviricota	Tolucaviricetes	Tolivirales	Tombusviridae	Tombusvirus	Pelargonium leaf curl virus	35280	ssRNA(+)	plants	Plants
BC-0302411570|k141_47887.3	MN532643	47.06	Orthornavirae	Lenarviricota	Miaviricetes	Ourlivirales	Botourmiaviridae	Botoulivirus	Botoulivirus betaplasmoparae	2955519	ssRNA(+)	other (specify)	Others
BC-0302411570|k141_48671.2	V01408	100	Orthornavirae	Kitrinoviricota	Alsuviricetes	Martellivirales	Virgaviridae	Tobamovirus	Tobacco mosaic virus	12242	ssRNA(+)	plants	Plants
BC-0302411570|k141_51235.4	MN532622	32.43	Orthornavirae	Lenarviricota	Miaviricetes	Ourlivirales	Botourmiaviridae	Betascleroulivirus	Betascleroulivirus betaplasmoparae	2955478	ssRNA(+)	other (specify)	Others
BC-0302411570|k141_5382.2	U03387	87.01	Orthornavirae	Kitrinoviricota	Alsuviricetes	Martellivirales	Virgaviridae	Tobamovirus	Turnip vein-clearing virus	29272	ssRNA(+)	plants	Plants
BC-0302411570|k141_75210.5	KR080326	67.5	Orthornavirae	Kitrinoviricota	Alsuviricetes	Martellivirales	Endornaviridae	Alphaendornavirus	Hot pepper alphaendornavirus	1711684	ssRNA(+)	plants	Plants
BC-0302411580|k141_13491.5	U07551	33.78	Orthornavirae	Pisuviricota	Pisoniviricetes	Sobelivirales	Barnaviridae	Barnavirus	Mushroom bacilliform virus	32625	ssRNA(+)	fungi	Fungi
BC-0302411580|k141_15054.1	BK010429	54.39	Orthornavirae	Lenarviricota	Howeltoviricetes	Cryppavirales	Mitoviridae	Duamitovirus	Duamitovirus dapi1	2955778	ssRNA(+)	plants	Plants
BC-0302411580|k141_19196.6	JN998606	28.38	Orthornavirae	Kitrinoviricota	Alsuviricetes	Hepelivirales	Hepeviridae	Rocahepevirus	Rocahepevirus ratti	1678145	ssRNA(+)	vertebrates	Vertebrates	human
BC-0302411580|k141_20409.3	AJ295949	29.37	Orthornavirae	Kitrinoviricota	Alsuviricetes	Martellivirales	Virgaviridae	Tobamovirus	Zucchini green mottle mosaic virus	111418	ssRNA(+)	plants	Plants
BC-0302411580|k141_31996.2	V01408	100	Orthornavirae	Kitrinoviricota	Alsuviricetes	Martellivirales	Virgaviridae	Tobamovirus	Tobacco mosaic virus	12242	ssRNA(+)	plants	Plants
BC-0302411580|k141_34098.4	X76931	37.5	Orthornavirae	Pisuviricota	Pisoniviricetes	Sobelivirales	Solemoviridae	Polerovirus	Cucurbit aphid-borne yellows virus	91753	ssRNA(+)	plants	Plants
BC-0302411580|k141_41862.5	EU043335	23.26	Orthornavirae	Kitrinoviricota	Alsuviricetes	Martellivirales	Virgaviridae	Tobamovirus	Cactus mild mottle virus	229030	ssRNA(+)	plants	Plants
BC-0302411580|k141_4922.2	MK584847	67.27	Orthornavirae	Lenarviricota	Miaviricetes	Ourlivirales	Botourmiaviridae	Magoulivirus	Cladosporium magoulivirus 2	2843962	ssRNA(+)	fungi	Fungi
BC-0302411580|k141_57229.5	DQ356949	30.32	Orthornavirae	Kitrinoviricota	Alsuviricetes	Martellivirales	Virgaviridae	Tobamovirus	Maracuja mosaic virus	368736	ssRNA(+)	plants	Plants
BC-0302411580|k141_61258.4	X15511	54.32	Orthornavirae	Kitrinoviricota	Tolucaviricetes	Tolivirales	Tombusviridae	Tombusvirus	Cymbidium ringspot virus	12144	ssRNA(+)	plants	Plants
BC-0302411580|k141_6449.4	Y10973	34.71	Orthornavirae	Pisuviricota	Stelpaviricetes	Patatavirales	Potyviridae	Bymovirus	Barley mild mosaic virus	12466	ssRNA(+)	plants	Plants
BC-0302411580|k141_65084.3	MN532605	28.71	Orthornavirae	Lenarviricota	Miaviricetes	Ourlivirales	Botourmiaviridae	Magoulivirus	Magoulivirus xiplasmoparae	2956177	ssRNA(+)	other (specify)	Others
BC-0302411580|k141_66979.2	MN532616	55.17	Orthornavirae	Lenarviricota	Miaviricetes	Ourlivirales	Botourmiaviridae	Magoulivirus	Magoulivirus omegaplasmoparae	2956168	ssRNA(+)	other (specify)	Others
BC-0302411580|k141_69038.5	MN532590	87.93	Orthornavirae	Lenarviricota	Miaviricetes	Ourlivirales	Botourmiaviridae	Botoulivirus	Botoulivirus alphaplasmoparae	2955517	ssRNA(+)	other (specify)	Others
BC-0302411580|k141_693.5	KR349343	32.11	Orthornavirae	Kitrinoviricota	Alsuviricetes	Tymovirales	Betaflexiviridae	Carlavirus	Atractylodes mottle virus	1702121	ssRNA(+)	plants	Plants
BC-0302411580|k141_73625.5	JF716350	45.24	Orthornavirae					Botybirnavirus	Botrytis porri botybirnavirus 1	1918014	dsRNA	fungi	Fungi
BC-0302411580|k141_76843.2	MN532636	39.53	Orthornavirae	Lenarviricota	Miaviricetes	Ourlivirales	Botourmiaviridae	Gammascleroulivirus	Gammascleroulivirus alphaplasmoparae	2955940	ssRNA(+)	other (specify)	Others
BC-0302411580|k141_77674.5	HQ389540	30.73	Orthornavirae	Kitrinoviricota	Alsuviricetes	Martellivirales	Virgaviridae	Tobamovirus	Passion fruit mosaic virus	1032457	ssRNA(+)	plants	Plants
BC-0302411580|k141_80044.3	MK584845	74.53	Orthornavirae	Lenarviricota	Miaviricetes	Ourlivirales	Botourmiaviridae	Magoulivirus	Acremonium magoulivirus	2843642	ssRNA(+)	fungi	Fungi
BC-0302411580|k141_875.4	MN532622	71.15	Orthornavirae	Lenarviricota	Miaviricetes	Ourlivirales	Botourmiaviridae	Betascleroulivirus	Betascleroulivirus betaplasmoparae	2955478	ssRNA(+)	other (specify)	Others
BC-0302411580|k141_9595.5	MN532595	63.3	Orthornavirae	Lenarviricota	Miaviricetes	Ourlivirales	Botourmiaviridae	Magoulivirus	Magoulivirus deltaplasmoparae	2956155	ssRNA(+)	other (specify)	Others
BC-0302411589|k141_19522.5	V01408	100	Orthornavirae	Kitrinoviricota	Alsuviricetes	Martellivirales	Virgaviridae	Tobamovirus	Tobacco mosaic virus	12242	ssRNA(+)	plants	Plants
BC-0302411589|k141_19615.1	V01408	100	Orthornavirae	Kitrinoviricota	Alsuviricetes	Martellivirales	Virgaviridae	Tobamovirus	Tobacco mosaic virus	12242	ssRNA(+)	plants	Plants
BC-0302411589|k141_21944.1	KT383474	100	Orthornavirae	Kitrinoviricota	Alsuviricetes	Martellivirales	Virgaviridae	Tobamovirus	Tomato brown rugose fruit virus	1761477	ssRNA(+)	plants	Plants
BC-0302411589|k141_4200.4	X83964	52.73	Orthornavirae	Kitrinoviricota	Tolucaviricetes	Tolivirales	Tombusviridae	Avenavirus	Oat chlorotic stunt virus	146762	ssRNA	plants	Plants
BC-0302411589|k141_62296.3	U22521	29.85	Orthornavirae	Pisuviricota	Pisoniviricetes	Picornavirales	Picornaviridae	Enterovirus	Enterovirus A	138948	ssRNA(+)	vertebrates	Vertebrates	human
BC-0302411589|k141_64076.1	V01408	100	Orthornavirae	Kitrinoviricota	Alsuviricetes	Martellivirales	Virgaviridae	Tobamovirus	Tobacco mosaic virus	12242	ssRNA(+)	plants	Plants
BC-0302411589|k141_6729.5	AF484251	93.66	Orthornavirae	Kitrinoviricota	Alsuviricetes	Tymovirales	Alphaflexiviridae	Potexvirus	Pepino mosaic virus	112229	ssRNA(+)	plants	Plants
BC-0302411589|k141_70247.2	FR687854	70.8	Orthornavirae	Pisuviricota	Duplopiviricetes	Durnavirales	Partitiviridae	Deltapartitivirus	Fig cryptic virus	882768	dsRNA	plants	Plants
BC-0302411589|k141_77915.4	HQ667979	100	Orthornavirae	Kitrinoviricota	Alsuviricetes	Martellivirales	Virgaviridae	Tobamovirus	Ribgrass mosaic virus	51680	ssRNA(+)	plants	Plants
BC-0302411788|k141_405.1	MN908947	100	Orthornavirae	Pisuviricota	Pisoniviricetes	Nidovirales	Coronaviridae	Betacoronavirus	Severe acute respiratory syndrome-related coronavirus	694009	ssRNA(+)	vertebrates	Vertebrates	human
BC-0302411830|k141_1296.2	HQ871931	31.65	Orthornavirae	Kitrinoviricota	Magsaviricetes	Nodamuvirales	Sinhaliviridae	Sinaivirus	Lake Sinai virus 1	1041806	ssRNA(+)	invertebrates	Invertebrates
BC-0302411830|k141_13957.2	AY163842	41.52	Orthornavirae	Kitrinoviricota	Tolucaviricetes	Tolivirales	Tombusviridae	Tombusvirus	Cucumber Bulgarian latent virus	2560401	ssRNA(+)	plants	Plants
BC-0302411830|k141_14938.6	AJ295948	27.86	Orthornavirae	Kitrinoviricota	Alsuviricetes	Martellivirales	Virgaviridae	Tobamovirus	Kyuri green mottle mosaic virus	111970	ssRNA(+)	plants	Plants
BC-0302411830|k141_21071.6	EU770623	37.89	Orthornavirae	Lenarviricota	Miaviricetes	Ourlivirales	Botourmiaviridae	Ourmiavirus	Ourmia melon virus	186786	ssRNA(+)	plants	Plants
BC-0302411830|k141_36043.3	MN532601	61.21	Orthornavirae	Lenarviricota	Miaviricetes	Ourlivirales	Botourmiaviridae	Magoulivirus	Magoulivirus kappaplasmoparae	2956163	ssRNA(+)	other (specify)	Others
BC-0302411830|k141_42358.1	MK804171	27.62	Orthornavirae	Kitrinoviricota	Alsuviricetes	Martellivirales	Kitaviridae	Cilevirus	Passion fruit green spot virus	989895	ssRNA(+)	plants	Plants
BC-0302411830|k141_44633.2	AJ012005	28.57	Orthornavirae	Kitrinoviricota	Alsuviricetes	Martellivirales	Virgaviridae	Furovirus	Chinese wheat mosaic virus	83544	ssRNA(+)	plants	Plants
BC-0302411830|k141_46625.1	MN532622	32.43	Orthornavirae	Lenarviricota	Miaviricetes	Ourlivirales	Botourmiaviridae	Betascleroulivirus	Betascleroulivirus betaplasmoparae	2955478	ssRNA(+)	other (specify)	Others
BC-0302411830|k141_47917.5	BK010429	51.3	Orthornavirae	Lenarviricota	Howeltoviricetes	Cryppavirales	Mitoviridae	Duamitovirus	Duamitovirus dapi1	2955778	ssRNA(+)	plants	Plants
BC-0302411830|k141_50889.1	KX280012	28.57	Orthornavirae	Negarnaviricota	Ellioviricetes	Bunyavirales	Leishbuviridae	Shilevirus	Shilevirus leptomonadis	2560552	ssRNA(-)	protozoa	Others
BC-0302411830|k141_51593.4	V01408	100	Orthornavirae	Kitrinoviricota	Alsuviricetes	Martellivirales	Virgaviridae	Tobamovirus	Tobacco mosaic virus	12242	ssRNA(+)	plants	Plants
BC-0302411830|k141_53999.4	DQ288865	39.04	Orthornavirae	Pisuviricota	Pisoniviricetes	Picornavirales	Dicistroviridae	Triatovirus	Homalodisca coagulata virus 1	2170238	ssRNA(+)	invertebrates	Invertebrates
BC-0302411830|k141_56085.6	U90136	39.53	Orthornavirae	Lenarviricota	Amabiliviricetes	Wolframvirales	Narnaviridae	Narnavirus	Saccharomyces 23S RNA narnavirus	198599	ssRNA(+)	fungi	Fungi
BC-0302411841|k141_407.6	M81413	100	Orthornavirae	Kitrinoviricota	Alsuviricetes	Martellivirales	Virgaviridae	Tobamovirus	Pepper mild mottle virus	12239	ssRNA(+)	plants	Plants	human
BC-0302411872|k141_100938.6	V01408	100	Orthornavirae	Kitrinoviricota	Alsuviricetes	Martellivirales	Virgaviridae	Tobamovirus	Tobacco mosaic virus	12242	ssRNA(+)	plants	Plants
BC-0302411872|k141_111990.2	MF362666	24.79	Orthornavirae	Kitrinoviricota	Alsuviricetes	Martellivirales	Endornaviridae	Alphaendornavirus	Helianthus annuus alphaendornavirus	2184469	ssRNA(+)	plants	Plants
BC-0302411872|k141_114092.2	KT598226	90.74	Orthornavirae	Kitrinoviricota	Alsuviricetes	Tymovirales	Deltaflexiviridae	Deltaflexivirus	Soybean-associated deltaflexivirus 1	2169866	ssRNA(+)	plants	Plants
BC-0302411872|k141_115662.3	J04357	42.5	Orthornavirae	Kitrinoviricota	Tolucaviricetes	Tolivirales	Tombusviridae	Dianthovirus	Red clover necrotic mosaic virus	12267	ssRNA(+)	plants	Plants
BC-0302411872|k141_18058.1	JF495127	38.22	Orthornavirae	Pisuviricota	Pisoniviricetes	Sobelivirales	Solemoviridae	Sobemovirus	Soybean yellow common mosaic virus	1080798	ssRNA(+)	plants	Plants
BC-0302411872|k141_21228.5	MG721540	62.5	Orthornavirae	Lenarviricota	Howeltoviricetes	Cryppavirales	Mitoviridae	Duamitovirus	Duamitovirus bevu1	2955768	ssRNA(+)	plants	Plants
BC-0302411872|k141_23454.1	MN532613	100	Orthornavirae	Lenarviricota	Miaviricetes	Ourlivirales	Botourmiaviridae	Magoulivirus	Magoulivirus jiplasmoparae	2956162	ssRNA(+)	other (specify)	Others
BC-0302411872|k141_31038.3	S51557	27.66	Orthornavirae	Kitrinoviricota	Alsuviricetes	Martellivirales	Mayoviridae	Idaeovirus	Idaeovirus rubi	2955987	ssRNA(+)	plants	Plants
BC-0302411872|k141_56765.3	BK014054	60.28	Orthornavirae	Lenarviricota	Leviviricetes	Norzivirales	Fiersviridae	Keghovirus	Keghovirus borborovivens	2845044	ssRNA(+)	bacteria	Bacteria
BC-0302411872|k141_57540.5	MN532658	78.45	Orthornavirae	Lenarviricota	Miaviricetes	Ourlivirales	Botourmiaviridae	Scleroulivirus	Scleroulivirus kappaplasmoparae	2956412	ssRNA(+)	other (specify)	Others		yes
BC-0302411872|k141_58143.4	KR349343	29.55	Orthornavirae	Kitrinoviricota	Alsuviricetes	Tymovirales	Betaflexiviridae	Carlavirus	Atractylodes mottle virus	1702121	ssRNA(+)	plants	Plants
BC-0302411872|k141_69875.3	KX774630	26.26	Orthornavirae	Negarnaviricota	Ellioviricetes	Bunyavirales	Phenuiviridae	Laulavirus	Laurel Lake laulavirus	2560549	ssRNA(-)	invertebrates	Invertebrates
BC-0302411872|k141_74342.5	MN532601	69.67	Orthornavirae	Lenarviricota	Miaviricetes	Ourlivirales	Botourmiaviridae	Magoulivirus	Magoulivirus kappaplasmoparae	2956163	ssRNA(+)	other (specify)	Others
BC-0302411872|k141_99055.4	X83964	54.22	Orthornavirae	Kitrinoviricota	Tolucaviricetes	Tolivirales	Tombusviridae	Avenavirus	Oat chlorotic stunt virus	146762	ssRNA	plants	Plants
BC-0302411919|k141_4379.5	KX774630	26.26	Orthornavirae	Negarnaviricota	Ellioviricetes	Bunyavirales	Phenuiviridae	Laulavirus	Laurel Lake laulavirus	2560549	ssRNA(-)	invertebrates	Invertebrates
BC-0302412756|k141_12562.6	V01408	100	Orthornavirae	Kitrinoviricota	Alsuviricetes	Martellivirales	Virgaviridae	Tobamovirus	Tobacco mosaic virus	12242	ssRNA(+)	plants	Plants
BC-0302412756|k141_13514.4	U22521	29.85	Orthornavirae	Pisuviricota	Pisoniviricetes	Picornavirales	Picornaviridae	Enterovirus	Enterovirus A	138948	ssRNA(+)	vertebrates	Vertebrates	human
BC-0302412756|k141_13615.2	KT598226	35.08	Orthornavirae	Kitrinoviricota	Alsuviricetes	Tymovirales	Deltaflexiviridae	Deltaflexivirus	Soybean-associated deltaflexivirus 1	2169866	ssRNA(+)	plants	Plants
BC-0302412756|k141_1642.6	MK372903	68.18	Orthornavirae	Lenarviricota	Howeltoviricetes	Cryppavirales	Mitoviridae	Duamitovirus	Duamitovirus rhso34	2955833	ssRNA(+)	fungi	Fungi
BC-0302412756|k141_16787.2	KR997836	38.46	Orthornavirae	Lenarviricota	Miaviricetes	Ourlivirales	Botourmiaviridae	Penoulivirus	Phomosis penoulivirus	2845835	ssRNA(+)	fungi	Fungi
BC-0302412756|k141_22118.4	BK010429	54.31	Orthornavirae	Lenarviricota	Howeltoviricetes	Cryppavirales	Mitoviridae	Duamitovirus	Duamitovirus dapi1	2955778	ssRNA(+)	plants	Plants
BC-0302412756|k141_24278.3	D55668	31.14	Orthornavirae	Pisuviricota	Duplopiviricetes	Durnavirales	Partitiviridae	Gammapartitivirus	Fusarium solani virus 1	1511847	dsRNA	fungi	Fungi
BC-0302412756|k141_27792.2	BK010429	52.17	Orthornavirae	Lenarviricota	Howeltoviricetes	Cryppavirales	Mitoviridae	Duamitovirus	Duamitovirus dapi1	2955778	ssRNA(+)	plants	Plants
BC-0302412756|k141_2996.1	BK010429	53.45	Orthornavirae	Lenarviricota	Howeltoviricetes	Cryppavirales	Mitoviridae	Duamitovirus	Duamitovirus dapi1	2955778	ssRNA(+)	plants	Plants
BC-0302412756|k141_30762.2	AY033436	36.96	Orthornavirae	Pisuviricota	Duplopiviricetes	Durnavirales	Partitiviridae	Gammapartitivirus	Discula destructiva virus 2	160484	dsRNA	fungi	Fungi
BC-0302412756|k141_36798.6	MG721540	62.5	Orthornavirae	Lenarviricota	Howeltoviricetes	Cryppavirales	Mitoviridae	Duamitovirus	Duamitovirus bevu1	2955768	ssRNA(+)	plants	Plants
BC-0302412756|k141_37617.3	AY830918	46.11	Orthornavirae	Kitrinoviricota	Tolucaviricetes	Tolivirales	Tombusviridae	Tombusvirus	Grapevine Algerian latent virus	208084	ssRNA(+)	plants	Plants
BC-0302412756|k141_38335.5	LC413502	57.48	Orthornavirae	Lenarviricota	Miaviricetes	Ourlivirales	Botourmiaviridae	Betascleroulivirus	Betascleroulivirus pyriculariae	2846015	ssRNA(+)	fungi	Fungi
BC-0302412756|k141_46549.5	AJ295949	27.27	Orthornavirae	Kitrinoviricota	Alsuviricetes	Martellivirales	Virgaviridae	Tobamovirus	Zucchini green mottle mosaic virus	111418	ssRNA(+)	plants	Plants
BC-0302412756|k141_48076.1	KT598226	35.08	Orthornavirae	Kitrinoviricota	Alsuviricetes	Tymovirales	Deltaflexiviridae	Deltaflexivirus	Soybean-associated deltaflexivirus 1	2169866	ssRNA(+)	plants	Plants
BC-0302412756|k141_4815.4	U22521	29.85	Orthornavirae	Pisuviricota	Pisoniviricetes	Picornavirales	Picornaviridae	Enterovirus	Enterovirus A	138948	ssRNA(+)	vertebrates	Vertebrates	human
BC-0302412756|k141_50194.4	BK010429	53.45	Orthornavirae	Lenarviricota	Howeltoviricetes	Cryppavirales	Mitoviridae	Duamitovirus	Duamitovirus dapi1	2955778	ssRNA(+)	plants	Plants
BC-0302412756|k141_58057.1	KR997836	37.07	Orthornavirae	Lenarviricota	Miaviricetes	Ourlivirales	Botourmiaviridae	Penoulivirus	Phomosis penoulivirus	2845835	ssRNA(+)	fungi	Fungi
BC-0302412756|k141_67223.6	MN532675	60.22	Orthornavirae	Lenarviricota	Miaviricetes	Ourlivirales	Botourmiaviridae	Penoulivirus	Penoulivirus zetaplasmoparae	2956297	ssRNA(+)	other (specify)	Others
BC-0302412756|k141_76586.6	BK010429	53.45	Orthornavirae	Lenarviricota	Howeltoviricetes	Cryppavirales	Mitoviridae	Duamitovirus	Duamitovirus dapi1	2955778	ssRNA(+)	plants	Plants
BC-0302412756|k141_79416.6	BK010429	53.04	Orthornavirae	Lenarviricota	Howeltoviricetes	Cryppavirales	Mitoviridae	Duamitovirus	Duamitovirus dapi1	2955778	ssRNA(+)	plants	Plants
BC-0302412756|k141_9202.2	MK584828	64.46	Orthornavirae	Lenarviricota	Howeltoviricetes	Cryppavirales	Mitoviridae	Duamitovirus	Duamitovirus epni1	2955779	ssRNA(+)	fungi	Fungi
BC-0302412843|k141_1420.3	MG721540	61.95	Orthornavirae	Lenarviricota	Howeltoviricetes	Cryppavirales	Mitoviridae	Duamitovirus	Duamitovirus bevu1	2955768	ssRNA(+)	plants	Plants
BC-0302412843|k141_149.6	KC610514	60.33	Orthornavirae	Duplornaviricota	Chrymotiviricetes	Ghabrivirales	Totiviridae	Totivirus	Scheffersomyces segobiensis virus L	1300323	dsRNA	fungi	Fungi
BC-0302412843|k141_1518.3	V01408	100	Orthornavirae	Kitrinoviricota	Alsuviricetes	Martellivirales	Virgaviridae	Tobamovirus	Tobacco mosaic virus	12242	ssRNA(+)	plants	Plants
BC-0302412843|k141_18891.4	KT598226	35.08	Orthornavirae	Kitrinoviricota	Alsuviricetes	Tymovirales	Deltaflexiviridae	Deltaflexivirus	Soybean-associated deltaflexivirus 1	2169866	ssRNA(+)	plants	Plants
BC-0302412843|k141_7523.4	HQ389540	31.22	Orthornavirae	Kitrinoviricota	Alsuviricetes	Martellivirales	Virgaviridae	Tobamovirus	Passion fruit mosaic virus	1032457	ssRNA(+)	plants	Plants
BC-0302412843|k141_906.2	AF171942	41.82	Orthornavirae	Kitrinoviricota	Magsaviricetes	Nodamuvirales	Nodaviridae	Alphanodavirus	Pariacoto virus	103782	ssRNA(+)	invertebrates	Invertebrates
BC-0302412855|k141_104533.6	V01408	99.35	Orthornavirae	Kitrinoviricota	Alsuviricetes	Martellivirales	Virgaviridae	Tobamovirus	Tobacco mosaic virus	12242	ssRNA(+)	plants	Plants
BC-0302412855|k141_105981.2	MN532662	96.58	Orthornavirae	Lenarviricota	Miaviricetes	Ourlivirales	Botourmiaviridae	Scleroulivirus	Scleroulivirus xiplasmoparae	2956422	ssRNA(+)	other (specify)	Others
BC-0302412855|k141_107810.2	MN386962	42.48	Orthornavirae	Lenarviricota	Miaviricetes	Ourlivirales	Botourmiaviridae	Penoulivirus	Penoulivirus malus	2956295	ssRNA(+)	plants	Plants
BC-0302412855|k141_108070.3	AY616760	56.79	Orthornavirae	Kitrinoviricota	Tolucaviricetes	Tolivirales	Tombusviridae	Alphanecrovirus	Olive mild mosaic virus	295090	ssRNA(+)	plants	Plants
BC-0302412855|k141_109971.1	MN532675	58.03	Orthornavirae	Lenarviricota	Miaviricetes	Ourlivirales	Botourmiaviridae	Penoulivirus	Penoulivirus zetaplasmoparae	2956297	ssRNA(+)	other (specify)	Others
BC-0302412855|k141_110244.4	V01408	100	Orthornavirae	Kitrinoviricota	Alsuviricetes	Martellivirales	Virgaviridae	Tobamovirus	Tobacco mosaic virus	12242	ssRNA(+)	plants	Plants
BC-0302412855|k141_110403.4	X83964	55.42	Orthornavirae	Kitrinoviricota	Tolucaviricetes	Tolivirales	Tombusviridae	Avenavirus	Oat chlorotic stunt virus	146762	ssRNA	plants	Plants
BC-0302412855|k141_115597.1	MF580384	48.49	Orthornavirae	Kitrinoviricota	Tolucaviricetes	Tolivirales	Tombusviridae	Luteovirus	Apple associated luteovirus	2054409	ssRNA(+)	plants	Plants
BC-0302412855|k141_116322.6	BK010429	50	Orthornavirae	Lenarviricota	Howeltoviricetes	Cryppavirales	Mitoviridae	Duamitovirus	Duamitovirus dapi1	2955778	ssRNA(+)	plants	Plants
BC-0302412855|k141_116698.5	D84410	36.89	Orthornavirae	Kitrinoviricota	Alsuviricetes	Hepelivirales	Benyviridae	Benyvirus	Beet necrotic yellow vein virus	31721	ssRNA(+)	plants	Plants
BC-0302412855|k141_118263.4	MK584842	64.65	Orthornavirae	Lenarviricota	Miaviricetes	Ourlivirales	Botourmiaviridae	Botoulivirus	Epicoccum botoulivirus	2844155	ssRNA(+)	fungi	Fungi
BC-0302412855|k141_122398.1	X02986	35.65	Orthornavirae	Kitrinoviricota	Tolucaviricetes	Tolivirales	Tombusviridae	Alphacarmovirus	Carnation mottle virus	11986	ssRNA(+)	plants	Plants
BC-0302412855|k141_125062.5	MN532660	30.08	Orthornavirae	Lenarviricota	Miaviricetes	Ourlivirales	Botourmiaviridae	Scleroulivirus	Scleroulivirus miplasmoparae	2956414	ssRNA(+)	other (specify)	Others
BC-0302412855|k141_127038.5	X13063	90	Orthornavirae	Pisuviricota	Pisoniviricetes	Sobelivirales	Solemoviridae	Polerovirus	Turnip yellows virus	131083	ssRNA(+)	plants	Plants
BC-0302412855|k141_127419.1	BK010429	54.39	Orthornavirae	Lenarviricota	Howeltoviricetes	Cryppavirales	Mitoviridae	Duamitovirus	Duamitovirus dapi1	2955778	ssRNA(+)	plants	Plants
BC-0302412855|k141_132529.6	BK010429	53.04	Orthornavirae	Lenarviricota	Howeltoviricetes	Cryppavirales	Mitoviridae	Duamitovirus	Duamitovirus dapi1	2955778	ssRNA(+)	plants	Plants
BC-0302412855|k141_13273.4	MG721540	61.95	Orthornavirae	Lenarviricota	Howeltoviricetes	Cryppavirales	Mitoviridae	Duamitovirus	Duamitovirus bevu1	2955768	ssRNA(+)	plants	Plants
BC-0302412855|k141_135696.5	BK010429	54.31	Orthornavirae	Lenarviricota	Howeltoviricetes	Cryppavirales	Mitoviridae	Duamitovirus	Duamitovirus dapi1	2955778	ssRNA(+)	plants	Plants
BC-0302412855|k141_136463.2	JX971978	54.68	Orthornavirae	Pisuviricota	Duplopiviricetes	Durnavirales	Partitiviridae	Betapartitivirus	Red clover cryptic virus 2	1323524	dsRNA	plants	Plants
BC-0302412855|k141_16988.6	MN532595	63.3	Orthornavirae	Lenarviricota	Miaviricetes	Ourlivirales	Botourmiaviridae	Magoulivirus	Magoulivirus deltaplasmoparae	2956155	ssRNA(+)	other (specify)	Others
BC-0302412855|k141_18068.1	BK010429	51.3	Orthornavirae	Lenarviricota	Howeltoviricetes	Cryppavirales	Mitoviridae	Duamitovirus	Duamitovirus dapi1	2955778	ssRNA(+)	plants	Plants
BC-0302412855|k141_18901.1	AY303787	78.14	Orthornavirae	Pisuviricota	Pisoniviricetes	Picornavirales	Secoviridae	Nepovirus	Raspberry ringspot virus	12809	ssRNA(+)	plants	Plants
BC-0302412855|k141_28949.2	BK013580	44	Orthornavirae	Lenarviricota	Leviviricetes	Norzivirales	Fiersviridae	Cehakivirus	Cehakivirus limihabitans	2843924	ssRNA(+)	bacteria	Bacteria
BC-0302412855|k141_30869.4	AJ557804	35.09	Orthornavirae	Kitrinoviricota	Tolucaviricetes	Tolivirales	Tombusviridae	Aureusvirus	Johnsongrass chlorotic stripe mosaic virus	229149	ssRNA(+)	plants	Plants
BC-0302412855|k141_41958.2	BR001666	49.18	Orthornavirae	Negarnaviricota	Monjiviricetes	Mononegavirales	Rhabdoviridae	Replylivirus	Replylivirus allogus	2956359	ssRNA(-)	vertebrates	Vertebrates
BC-0302412855|k141_46035.1	KT581451	33.33	Orthornavirae	Kitrinoviricota	Alsuviricetes	Tymovirales	Deltaflexiviridae	Deltaflexivirus	Sclerotinia deltaflexivirus 1	2169865	ssRNA(+)	fungi	Fungi
BC-0302412855|k141_51237.6	MN532616	57.94	Orthornavirae	Lenarviricota	Miaviricetes	Ourlivirales	Botourmiaviridae	Magoulivirus	Magoulivirus omegaplasmoparae	2956168	ssRNA(+)	other (specify)	Others
BC-0302412855|k141_51857.3	S51557	30.19	Orthornavirae	Kitrinoviricota	Alsuviricetes	Martellivirales	Mayoviridae	Idaeovirus	Idaeovirus rubi	2955987	ssRNA(+)	plants	Plants
BC-0302412855|k141_52884.2	J04692	73.77	Orthornavirae	Duplornaviricota	Chrymotiviricetes	Ghabrivirales	Totiviridae	Totivirus	Saccharomyces cerevisiae virus L-A	11008	dsRNA	fungi	Fungi
BC-0302412855|k141_63069.4	MN532631	57.63	Orthornavirae	Lenarviricota	Miaviricetes	Ourlivirales	Botourmiaviridae	Scleroulivirus	Scleroulivirus alphaplasmoparae	2956405	ssRNA(+)	other (specify)	Others
BC-0302412855|k141_82753.1	MK682518	36.42	Orthornavirae	Lenarviricota	Howeltoviricetes	Cryppavirales	Mitoviridae	Unuamitovirus	Unuamitovirus enmu6	2956598	ssRNA(+)	fungi	Fungi
BC-0302412855|k141_87003.3	AB573435	31.25	Orthornavirae	Kitrinoviricota	Alsuviricetes	Hepelivirales	Hepeviridae	Paslahepevirus	Paslahepevirus balayani	1678143	ssRNA(+)	vertebrates	Vertebrates	human
BC-0302412855|k141_91214.1	MN605476	73.08	Orthornavirae	Lenarviricota	Miaviricetes	Ourlivirales	Botourmiaviridae	Betascleroulivirus	Betascleroulivirus botrytidis	2955479	ssRNA(+)	fungi	Fungi
BC-0302412855|k141_92622.1	FR687854	44.86	Orthornavirae	Pisuviricota	Duplopiviricetes	Durnavirales	Partitiviridae	Deltapartitivirus	Fig cryptic virus	882768	dsRNA	plants	Plants
BC-0302412855|k141_97037.1	GU182408	23.91	Orthornavirae	Pisuviricota	Pisoniviricetes	Picornavirales	Picornaviridae	Oscivirus	Oscivirus A	1511781	ssRNA(+)	vertebrates	Vertebrates	non_mammalia_vertebrates
BC-0302412858|k141_4054.1	AF484251	93.66	Orthornavirae	Kitrinoviricota	Alsuviricetes	Tymovirales	Alphaflexiviridae	Potexvirus	Pepino mosaic virus	112229	ssRNA(+)	plants	Plants
BC-0302412858|k141_9367.3	MG721540	61.95	Orthornavirae	Lenarviricota	Howeltoviricetes	Cryppavirales	Mitoviridae	Duamitovirus	Duamitovirus bevu1	2955768	ssRNA(+)	plants	Plants
BC-0302412862|k141_100035.2	LC195294	67.9	Orthornavirae	Pisuviricota	Duplopiviricetes	Durnavirales	Partitiviridae	Deltapartitivirus	Pepper cryptic virus 2	1050903	dsRNA	plants	Plants
BC-0302412862|k141_115674.2	V01408	99.35	Orthornavirae	Kitrinoviricota	Alsuviricetes	Martellivirales	Virgaviridae	Tobamovirus	Tobacco mosaic virus	12242	ssRNA(+)	plants	Plants
BC-0302412862|k141_142990.2	AB569997	63.54	Orthornavirae	Pisuviricota	Duplopiviricetes	Durnavirales	Partitiviridae	Alphapartitivirus	Rosellinia necatrix partitivirus 2	859651	dsRNA	fungi	Fungi
BC-0302412862|k141_67390.5	MG721540	64.71	Orthornavirae	Lenarviricota	Howeltoviricetes	Cryppavirales	Mitoviridae	Duamitovirus	Duamitovirus bevu1	2955768	ssRNA(+)	plants	Plants
BC-0302412865|k141_106831.6	AB569997	54.4	Orthornavirae	Pisuviricota	Duplopiviricetes	Durnavirales	Partitiviridae	Alphapartitivirus	Rosellinia necatrix partitivirus 2	859651	dsRNA	fungi	Fungi
BC-0302412865|k141_118758.2	MK682513	27.94	Orthornavirae	Lenarviricota	Howeltoviricetes	Cryppavirales	Mitoviridae	Unuamitovirus	Unuamitovirus enmu1	2956593	ssRNA(+)	fungi	Fungi
BC-0302412865|k141_48742.2	LC195294	67.9	Orthornavirae	Pisuviricota	Duplopiviricetes	Durnavirales	Partitiviridae	Deltapartitivirus	Pepper cryptic virus 2	1050903	dsRNA	plants	Plants
BC-0302412865|k141_52252.5	MG721540	64.71	Orthornavirae	Lenarviricota	Howeltoviricetes	Cryppavirales	Mitoviridae	Duamitovirus	Duamitovirus bevu1	2955768	ssRNA(+)	plants	Plants
BC-0302412865|k141_96380.2	AB569997	63.54	Orthornavirae	Pisuviricota	Duplopiviricetes	Durnavirales	Partitiviridae	Alphapartitivirus	Rosellinia necatrix partitivirus 2	859651	dsRNA	fungi	Fungi
BC-0302412880|k141_3118.2	BK013632	68.67	Orthornavirae	Lenarviricota	Leviviricetes	Timlovirales	Steitzviridae	Gihfavirus	Gihfavirus pelohabitans	2844652	ssRNA(+)	bacteria	Bacteria
BC-0302412880|k141_3374.5	U62546	34.36	Orthornavirae	Kitrinoviricota	Tolucaviricetes	Tolivirales	Tombusviridae	Betanecrovirus	Tobacco necrosis virus D	12056	ssRNA(+)	plants	Plants
BC-0302412880|k141_4205.1	AM999771	42.02	Orthornavirae	Pisuviricota	Duplopiviricetes	Durnavirales	Partitiviridae	Alphapartitivirus	Chondrostereum purpureum cryptic virus 1	529380	dsRNA	fungi	Fungi
BC-0302412880|k141_4642.2	U01060	52.5	Orthornavirae	Duplornaviricota	Chrymotiviricetes	Ghabrivirales	Totiviridae	Totivirus	Saccharomyces cerevisiae virus LBCLa	2170233	dsRNA	fungi	Fungi
BC-0302412880|k141_4876.2	KC610514	61.16	Orthornavirae	Duplornaviricota	Chrymotiviricetes	Ghabrivirales	Totiviridae	Totivirus	Scheffersomyces segobiensis virus L	1300323	dsRNA	fungi	Fungi
BC-0302412883|k141_12533.1	BK014170	59.31	Orthornavirae	Lenarviricota	Leviviricetes	Norzivirales	Fiersviridae	Owenocuvirus	Owenocuvirus pelohabitans	2845720	ssRNA(+)	bacteria	Bacteria
BC-0302412883|k141_25675.4	MK682513	37.32	Orthornavirae	Lenarviricota	Howeltoviricetes	Cryppavirales	Mitoviridae	Unuamitovirus	Unuamitovirus enmu1	2956593	ssRNA(+)	fungi	Fungi
BC-0302412883|k141_30811.6	AF484251	93.66	Orthornavirae	Kitrinoviricota	Alsuviricetes	Tymovirales	Alphaflexiviridae	Potexvirus	Pepino mosaic virus	112229	ssRNA(+)	plants	Plants
BC-0302412883|k141_37664.6	MN908947	100	Orthornavirae	Pisuviricota	Pisoniviricetes	Nidovirales	Coronaviridae	Betacoronavirus	Severe acute respiratory syndrome-related coronavirus	694009	ssRNA(+)	vertebrates	Vertebrates	human
BC-0302412883|k141_7084.1	V01408	100	Orthornavirae	Kitrinoviricota	Alsuviricetes	Martellivirales	Virgaviridae	Tobamovirus	Tobacco mosaic virus	12242	ssRNA(+)	plants	Plants
BC-0302412896|k141_14357.2	BK013395	62.84	Orthornavirae	Lenarviricota	Leviviricetes	Norzivirales	Fiersviridae	Noehsivirus	Noehsivirus tellurivivens	2845692	ssRNA(+)	bacteria	Bacteria
BC-0302412896|k141_15139.3	BK013751	48.05	Orthornavirae	Lenarviricota	Leviviricetes	Norzivirales	Duinviridae	Kahshuvirus	Kahshuvirus borborenecus	2845039	ssRNA(+)	bacteria	Bacteria
BC-0302412896|k141_25918.6	V01408	99.35	Orthornavirae	Kitrinoviricota	Alsuviricetes	Martellivirales	Virgaviridae	Tobamovirus	Tobacco mosaic virus	12242	ssRNA(+)	plants	Plants
BC-0302412896|k141_26449.5	AF171942	41.82	Orthornavirae	Kitrinoviricota	Magsaviricetes	Nodamuvirales	Nodaviridae	Alphanodavirus	Pariacoto virus	103782	ssRNA(+)	invertebrates	Invertebrates
BC-0302412896|k141_5744.6	MN532638	77.32	Orthornavirae	Lenarviricota	Miaviricetes	Ourlivirales	Botourmiaviridae	Betascleroulivirus	Betascleroulivirus lambdaplasmoparae	2955486	ssRNA(+)	other (specify)	Others
BC-0302412896|k141_6052.4	KC610514	60.33	Orthornavirae	Duplornaviricota	Chrymotiviricetes	Ghabrivirales	Totiviridae	Totivirus	Scheffersomyces segobiensis virus L	1300323	dsRNA	fungi	Fungi
BC-0302412897|k141_15276.1	V01408	100	Orthornavirae	Kitrinoviricota	Alsuviricetes	Martellivirales	Virgaviridae	Tobamovirus	Tobacco mosaic virus	12242	ssRNA(+)	plants	Plants
BC-0302412918|k141_10061.3	V01408	100	Orthornavirae	Kitrinoviricota	Alsuviricetes	Martellivirales	Virgaviridae	Tobamovirus	Tobacco mosaic virus	12242	ssRNA(+)	plants	Plants
BC-0302412931|k141_16843.5	EF589670	57.41	Orthornavirae	Kitrinoviricota	Tolucaviricetes	Tolivirales	Tombusviridae	Aureusvirus	Maize white line mosaic virus	445227	ssRNA(+)	plants	Plants
BC-0302412931|k141_27532.1	AY100482	52.35	Orthornavirae	Kitrinoviricota	Tolucaviricetes	Tolivirales	Tombusviridae	Tombusvirus	Eggplant mottled crinkle virus	270256	ssRNA(+)	plants	Plants
BC-0302412931|k141_34260.2	AF452884	54.6	Orthornavirae	Kitrinoviricota	Tolucaviricetes	Tolivirales	Tombusviridae	Betanecrovirus	Beet black scorch virus	196375	ssRNA(+)	plants	Plants
BC-0302412931|k141_40061.5	V01408	100	Orthornavirae	Kitrinoviricota	Alsuviricetes	Martellivirales	Virgaviridae	Tobamovirus	Tobacco mosaic virus	12242	ssRNA(+)	plants	Plants
BC-0302412931|k141_46848.4	MK584847	69.09	Orthornavirae	Lenarviricota	Miaviricetes	Ourlivirales	Botourmiaviridae	Magoulivirus	Cladosporium magoulivirus 2	2843962	ssRNA(+)	fungi	Fungi
BC-0302412931|k141_48545.3	X83964	56.14	Orthornavirae	Kitrinoviricota	Tolucaviricetes	Tolivirales	Tombusviridae	Avenavirus	Oat chlorotic stunt virus	146762	ssRNA	plants	Plants
BC-0302412931|k141_54178.2	FR687854	44.86	Orthornavirae	Pisuviricota	Duplopiviricetes	Durnavirales	Partitiviridae	Deltapartitivirus	Fig cryptic virus	882768	dsRNA	plants	Plants
BC-0302412931|k141_62220.4	KX977569	23.42	Orthornavirae	Kitrinoviricota	Alsuviricetes	Martellivirales	Endornaviridae	Alphaendornavirus	Bell pepper alphaendornavirus	354328	ssRNA(+)	plants	Plants
BC-0302412931|k141_62638.1	MN532616	52.03	Orthornavirae	Lenarviricota	Miaviricetes	Ourlivirales	Botourmiaviridae	Magoulivirus	Magoulivirus omegaplasmoparae	2956168	ssRNA(+)	other (specify)	Others
BC-0302412931|k141_69574.1	AY004291	41.75	Orthornavirae	Pisuviricota	Pisoniviricetes	Sobelivirales	Solemoviridae	Sobemovirus	Sesbania mosaic virus	12558	ssRNA(+)	plants	Plants
BC-0302412931|k141_70525.4	MF580384	48.47	Orthornavirae	Kitrinoviricota	Tolucaviricetes	Tolivirales	Tombusviridae	Luteovirus	Apple associated luteovirus	2054409	ssRNA(+)	plants	Plants
BC-0302412931|k141_8417.1	HQ389540	29.46	Orthornavirae	Kitrinoviricota	Alsuviricetes	Martellivirales	Virgaviridae	Tobamovirus	Passion fruit mosaic virus	1032457	ssRNA(+)	plants	Plants
BC-0302412935|k141_104579.1	MN532677	87.31	Orthornavirae	Lenarviricota	Miaviricetes	Ourlivirales	Botourmiaviridae	Penoulivirus	Penoulivirus thetaplasmoparae	2956296	ssRNA(+)	other (specify)	Others
BC-0302412935|k141_109550.6	MN532662	88.54	Orthornavirae	Lenarviricota	Miaviricetes	Ourlivirales	Botourmiaviridae	Scleroulivirus	Scleroulivirus xiplasmoparae	2956422	ssRNA(+)	other (specify)	Others
BC-0302412935|k141_109666.1	KF412901	31.95	Orthornavirae	Pisuviricota	Pisoniviricetes	Picornavirales	Marnaviridae	Locarnavirus	Sanfarnavirus 2	2560739	ssRNA(+)	marine (S)	Others
BC-0302412935|k141_112343.6	KF031038	90.18	Orthornavirae	Kitrinoviricota	Alsuviricetes	Martellivirales	Bromoviridae	Ilarvirus	Blueberry shock virus	747056	ssRNA(+)	plants	Plants
BC-0302412935|k141_115010.4	U90136	41.46	Orthornavirae	Lenarviricota	Amabiliviricetes	Wolframvirales	Narnaviridae	Narnavirus	Saccharomyces 23S RNA narnavirus	198599	ssRNA(+)	fungi	Fungi
BC-0302412935|k141_119593.2	HQ677625	38.18	Orthornavirae	Kitrinoviricota	Tolucaviricetes	Tolivirales	Tombusviridae	Alphacarmovirus	Honeysuckle ringspot virus	943272	ssRNA(+)	plants	Plants
BC-0302412935|k141_120464.2	KX884002	30.26	Orthornavirae	Negarnaviricota	Chunqiuviricetes	Muvirales	Qinviridae	Yingvirus	Yingvirus wenzhouense	2507503	ssRNA(-)	invertebrates	Invertebrates
BC-0302412935|k141_121339.2	MG721540	61.95	Orthornavirae	Lenarviricota	Howeltoviricetes	Cryppavirales	Mitoviridae	Duamitovirus	Duamitovirus bevu1	2955768	ssRNA(+)	plants	Plants
BC-0302412935|k141_123934.3	JN117276	69.75	Orthornavirae	Pisuviricota	Duplopiviricetes	Durnavirales	Partitiviridae	Deltapartitivirus	Pepper cryptic virus 1	369643	dsRNA	plants	Plants
BC-0302412935|k141_124345.5	MN473199	92.11	Orthornavirae	Lenarviricota	Miaviricetes	Ourlivirales	Botourmiaviridae	Penoulivirus	Phoma penoulivirus	2845834	ssRNA(+)	fungi	Fungi
BC-0302412935|k141_13285.1	AF266518	32.72	Orthornavirae	Kitrinoviricota	Tolucaviricetes	Tolivirales	Tombusviridae	Zeavirus	Maize necrotic streak virus	137556	ssRNA(+)	plants	Plants
BC-0302412935|k141_132952.2	KT581451	38.71	Orthornavirae	Kitrinoviricota	Alsuviricetes	Tymovirales	Deltaflexiviridae	Deltaflexivirus	Sclerotinia deltaflexivirus 1	2169865	ssRNA(+)	fungi	Fungi
BC-0302412935|k141_135460.2	X15511	35.37	Orthornavirae	Kitrinoviricota	Tolucaviricetes	Tolivirales	Tombusviridae	Tombusvirus	Cymbidium ringspot virus	12144	ssRNA(+)	plants	Plants
BC-0302412935|k141_141212.2	AY303787	79.23	Orthornavirae	Pisuviricota	Pisoniviricetes	Picornavirales	Secoviridae	Nepovirus	Raspberry ringspot virus	12809	ssRNA(+)	plants	Plants
BC-0302412935|k141_143589.6	AY303787	80.67	Orthornavirae	Pisuviricota	Pisoniviricetes	Picornavirales	Secoviridae	Nepovirus	Raspberry ringspot virus	12809	ssRNA(+)	plants	Plants
BC-0302412935|k141_21666.4	MN532636	61.76	Orthornavirae	Lenarviricota	Miaviricetes	Ourlivirales	Botourmiaviridae	Gammascleroulivirus	Gammascleroulivirus alphaplasmoparae	2955940	ssRNA(+)	other (specify)	Others
BC-0302412935|k141_2484.1	V01408	100	Orthornavirae	Kitrinoviricota	Alsuviricetes	Martellivirales	Virgaviridae	Tobamovirus	Tobacco mosaic virus	12242	ssRNA(+)	plants	Plants
BC-0302412935|k141_39187.4	X02986	98.98	Orthornavirae	Kitrinoviricota	Tolucaviricetes	Tolivirales	Tombusviridae	Alphacarmovirus	Carnation mottle virus	11986	ssRNA(+)	plants	Plants
BC-0302412935|k141_40978.3	U90136	30.58	Orthornavirae	Lenarviricota	Amabiliviricetes	Wolframvirales	Narnaviridae	Narnavirus	Saccharomyces 23S RNA narnavirus	198599	ssRNA(+)	fungi	Fungi
BC-0302412935|k141_46467.1	AY881628	28.35	Orthornavirae	Kitrinoviricota	Alsuviricetes	Martellivirales	Closteroviridae	Closterovirus	Grapevine leafroll-associated virus 2	64003	ssRNA(+)	plants	Plants
BC-0302412935|k141_50107.2	FR687854	70.8	Orthornavirae	Pisuviricota	Duplopiviricetes	Durnavirales	Partitiviridae	Deltapartitivirus	Fig cryptic virus	882768	dsRNA	plants	Plants
BC-0302412935|k141_56865.1	AF277675	41.99	Orthornavirae	Pisuviricota	Pisoniviricetes	Picornavirales	Dicistroviridae	Aparavirus	Taura syndrome virus	142102	ssRNA(+)	invertebrates	Invertebrates
BC-0302412935|k141_57084.5	J04357	43.12	Orthornavirae	Kitrinoviricota	Tolucaviricetes	Tolivirales	Tombusviridae	Dianthovirus	Red clover necrotic mosaic virus	12267	ssRNA(+)	plants	Plants
BC-0302412935|k141_59799.4	U22521	31.34	Orthornavirae	Pisuviricota	Pisoniviricetes	Picornavirales	Picornaviridae	Enterovirus	Enterovirus A	138948	ssRNA(+)	vertebrates	Vertebrates	human
BC-0302412935|k141_75338.2	AF047013	57.44	Orthornavirae	Pisuviricota	Duplopiviricetes	Durnavirales	Partitiviridae	Betapartitivirus	Fusarium poae virus 1	75747	dsRNA	fungi	Fungi
BC-0302412935|k141_7833.2	KT581451	32.56	Orthornavirae	Kitrinoviricota	Alsuviricetes	Tymovirales	Deltaflexiviridae	Deltaflexivirus	Sclerotinia deltaflexivirus 1	2169865	ssRNA(+)	fungi	Fungi
BC-0302412935|k141_78364.1	AY615211	31.51	Orthornavirae	Pisuviricota	Duplopiviricetes	Durnavirales	Partitiviridae	Gammapartitivirus	Gremmeniella abietina RNA virus MS1	191436	dsRNA	fungi	Fungi
BC-0302412935|k141_83330.3	BK010429	57.02	Orthornavirae	Lenarviricota	Howeltoviricetes	Cryppavirales	Mitoviridae	Duamitovirus	Duamitovirus dapi1	2955778	ssRNA(+)	plants	Plants
BC-0302412935|k141_88927.5	MN532677	86.94	Orthornavirae	Lenarviricota	Miaviricetes	Ourlivirales	Botourmiaviridae	Penoulivirus	Penoulivirus thetaplasmoparae	2956296	ssRNA(+)	other (specify)	Others
BC-0302413047|k141_2340.6	MN617764	74.54	Orthornavirae	Pisuviricota	Duplopiviricetes	Durnavirales	Fusariviridae	Alphafusarivirus	Alphafusarivirus botrytidis	2955262	ssRNA(+)	fungi	Fungi
BC-0302413048|k141_212.4	MN908947	100	Orthornavirae	Pisuviricota	Pisoniviricetes	Nidovirales	Coronaviridae	Betacoronavirus	Severe acute respiratory syndrome-related coronavirus	694009	ssRNA(+)	vertebrates	Vertebrates	human
BC-0302413057|k141_12676.4	BK013636	65.44	Orthornavirae	Lenarviricota	Leviviricetes	Norzivirales	Fiersviridae	Cauhldivirus	Cauhldivirus limadaptatum	2843919	ssRNA(+)	bacteria	Bacteria
BC-0302413057|k141_2152.6	MG721540	61.95	Orthornavirae	Lenarviricota	Howeltoviricetes	Cryppavirales	Mitoviridae	Duamitovirus	Duamitovirus bevu1	2955768	ssRNA(+)	plants	Plants
BC-0302413057|k141_24337.1	X01678	100	Orthornavirae	Kitrinoviricota	Alsuviricetes	Martellivirales	Bromoviridae	Bromovirus	Brome mosaic virus	12302	ssRNA(+)	plants	Plants
BC-0302413057|k141_26140.3	X15511	54.6	Orthornavirae	Kitrinoviricota	Tolucaviricetes	Tolivirales	Tombusviridae	Tombusvirus	Cymbidium ringspot virus	12144	ssRNA(+)	plants	Plants
BC-0302413057|k141_36629.2	MT353902	24.43	Orthornavirae	Negarnaviricota	Ellioviricetes	Bunyavirales	Phenuiviridae	Laulavirus	Grapevine laulavirus 4	2844686	ssRNA(-)	fungi	Fungi
BC-0302413057|k141_9032.2	KX884062	45.81	Orthornavirae	Pisuviricota	Duplopiviricetes	Durnavirales	Picobirnaviridae	Orthopicobirnavirus	Orthopicobirnavirus beihaiense	NA	dsRNA	invertebrates	Invertebrates
BC-0302413061|k141_24734.1	BK013751	53.85	Orthornavirae	Lenarviricota	Leviviricetes	Norzivirales	Duinviridae	Kahshuvirus	Kahshuvirus borborenecus	2845039	ssRNA(+)	bacteria	Bacteria
BC-0302413061|k141_7159.6	MN605476	77.03	Orthornavirae	Lenarviricota	Miaviricetes	Ourlivirales	Botourmiaviridae	Betascleroulivirus	Betascleroulivirus botrytidis	2955479	ssRNA(+)	fungi	Fungi
BC-0302413066|k141_10157.2	HQ389540	31.22	Orthornavirae	Kitrinoviricota	Alsuviricetes	Martellivirales	Virgaviridae	Tobamovirus	Passion fruit mosaic virus	1032457	ssRNA(+)	plants	Plants
BC-0302413066|k141_102766.3	EU770623	24.91	Orthornavirae	Lenarviricota	Miaviricetes	Ourlivirales	Botourmiaviridae	Ourmiavirus	Ourmia melon virus	186786	ssRNA(+)	plants	Plants
BC-0302413066|k141_114599.2	KX883996	26.23	Orthornavirae	Negarnaviricota	Chunqiuviricetes	Muvirales	Qinviridae	Yingvirus	Yingvirus sanxiaense	2507501	ssRNA(-)	invertebrates	Invertebrates
BC-0302413066|k141_114651.3	MN473199	78.07	Orthornavirae	Lenarviricota	Miaviricetes	Ourlivirales	Botourmiaviridae	Penoulivirus	Phoma penoulivirus	2845834	ssRNA(+)	fungi	Fungi
BC-0302413066|k141_116121.2	MN532677	82.35	Orthornavirae	Lenarviricota	Miaviricetes	Ourlivirales	Botourmiaviridae	Penoulivirus	Penoulivirus thetaplasmoparae	2956296	ssRNA(+)	other (specify)	Others
BC-0302413066|k141_125357.4	MG721540	62.5	Orthornavirae	Lenarviricota	Howeltoviricetes	Cryppavirales	Mitoviridae	Duamitovirus	Duamitovirus bevu1	2955768	ssRNA(+)	plants	Plants
BC-0302413066|k141_129525.4	MN532632	64.13	Orthornavirae	Lenarviricota	Miaviricetes	Ourlivirales	Botourmiaviridae	Epsilonscleroulivirus	Epsilonscleroulivirus plasmoparae	2955871	ssRNA(+)	other (specify)	Others
BC-0302413066|k141_134188.4	MN532604	67.59	Orthornavirae	Lenarviricota	Miaviricetes	Ourlivirales	Botourmiaviridae	Magoulivirus	Magoulivirus niplasmoparae	2956167	ssRNA(+)	other (specify)	Others
BC-0302413066|k141_138413.4	MT353902	24.43	Orthornavirae	Negarnaviricota	Ellioviricetes	Bunyavirales	Phenuiviridae	Laulavirus	Grapevine laulavirus 4	2844686	ssRNA(-)	fungi	Fungi
BC-0302413066|k141_138927.1	MN605476	69.52	Orthornavirae	Lenarviricota	Miaviricetes	Ourlivirales	Botourmiaviridae	Betascleroulivirus	Betascleroulivirus botrytidis	2955479	ssRNA(+)	fungi	Fungi
BC-0302413066|k141_141236.6	LC057247	32.24	Orthornavirae	Kitrinoviricota	Alsuviricetes	Hepelivirales	Hepeviridae	Rocahepevirus	Rocahepevirus ratti	1678145	ssRNA(+)	vertebrates	Vertebrates	human
BC-0302413066|k141_147119.2	MN532616	62.38	Orthornavirae	Lenarviricota	Miaviricetes	Ourlivirales	Botourmiaviridae	Magoulivirus	Magoulivirus omegaplasmoparae	2956168	ssRNA(+)	other (specify)	Others
BC-0302413066|k141_19081.3	MG967280	54.66	Orthornavirae	Kitrinoviricota	Tolucaviricetes	Tolivirales	Tombusviridae	Aureusvirus	Elderberry aureusvirus 1	2304214	ssRNA(+)	plants	Plants
BC-0302413066|k141_41858.5	MG721540	63.39	Orthornavirae	Lenarviricota	Howeltoviricetes	Cryppavirales	Mitoviridae	Duamitovirus	Duamitovirus bevu1	2955768	ssRNA(+)	plants	Plants
BC-0302413066|k141_47282.6	BK010429	53.91	Orthornavirae	Lenarviricota	Howeltoviricetes	Cryppavirales	Mitoviridae	Duamitovirus	Duamitovirus dapi1	2955778	ssRNA(+)	plants	Plants
BC-0302413066|k141_57006.5	HQ852052	32.68	Orthornavirae	Kitrinoviricota	Alsuviricetes	Martellivirales	Kitaviridae	Higrevirus	Hibiscus green spot virus 2	1513278	ssRNA(+)	plants	Plants
BC-0302413066|k141_57498.5	AB017503	30.25	Orthornavirae	Kitrinoviricota	Alsuviricetes	Martellivirales	Virgaviridae	Tobamovirus	Wasabi mottle virus	1169032	ssRNA(+)	plants	Plants
BC-0302413066|k141_61202.2	HQ888865	40.25	Orthornavirae	Kitrinoviricota	Magsaviricetes	Nodamuvirales	Sinhaliviridae	Sinaivirus	Lake Sinai virus 2	1041831	ssRNA(+)	invertebrates	Invertebrates
BC-0302413066|k141_67080.2	X83964	52.41	Orthornavirae	Kitrinoviricota	Tolucaviricetes	Tolivirales	Tombusviridae	Avenavirus	Oat chlorotic stunt virus	146762	ssRNA	plants	Plants
BC-0302413066|k141_68345.4	BK010429	61.32	Orthornavirae	Lenarviricota	Howeltoviricetes	Cryppavirales	Mitoviridae	Duamitovirus	Duamitovirus dapi1	2955778	ssRNA(+)	plants	Plants
BC-0302413066|k141_71571.5	V01408	100	Orthornavirae	Kitrinoviricota	Alsuviricetes	Martellivirales	Virgaviridae	Tobamovirus	Tobacco mosaic virus	12242	ssRNA(+)	plants	Plants
BC-0302413066|k141_7221.5	FR687854	70.8	Orthornavirae	Pisuviricota	Duplopiviricetes	Durnavirales	Partitiviridae	Deltapartitivirus	Fig cryptic virus	882768	dsRNA	plants	Plants
BC-0302413066|k141_82247.5	AM940437	46.83	Orthornavirae	Pisuviricota	Pisoniviricetes	Sobelivirales	Solemoviridae	Sobemovirus	Sowbane mosaic virus	378833	ssRNA(+)	plants	Plants
BC-0302413066|k141_9275.6	MN532613	99.15	Orthornavirae	Lenarviricota	Miaviricetes	Ourlivirales	Botourmiaviridae	Magoulivirus	Magoulivirus jiplasmoparae	2956162	ssRNA(+)	other (specify)	Others
BC-0302413066|k141_9522.5	GU345042	29.14	Orthornavirae	Kitrinoviricota	Alsuviricetes	Hepelivirales	Hepeviridae	Rocahepevirus	Rocahepevirus ratti	1678145	ssRNA(+)	vertebrates	Vertebrates	human
BC-0302413079|k141_21081.2	MN532630	75.34	Orthornavirae	Lenarviricota	Miaviricetes	Ourlivirales	Botourmiaviridae	Betascleroulivirus	Betascleroulivirus iotaplasmoparae	2955484	ssRNA(+)	other (specify)	Others
BC-0302413079|k141_21541.6	KX774630	26.26	Orthornavirae	Negarnaviricota	Ellioviricetes	Bunyavirales	Phenuiviridae	Laulavirus	Laurel Lake laulavirus	2560549	ssRNA(-)	invertebrates	Invertebrates
BC-0302413079|k141_2360.2	MH206615	35.58	Orthornavirae	Kitrinoviricota	Alsuviricetes	Martellivirales	Closteroviridae	Ampelovirus	Air potato ampelovirus 1	2560290	ssRNA(+)	plants	Plants
BC-0302413079|k141_24698.2	AY616760	50.6	Orthornavirae	Kitrinoviricota	Tolucaviricetes	Tolivirales	Tombusviridae	Alphanecrovirus	Olive mild mosaic virus	295090	ssRNA(+)	plants	Plants
BC-0302413079|k141_34621.2	AY616760	45.73	Orthornavirae	Kitrinoviricota	Tolucaviricetes	Tolivirales	Tombusviridae	Alphanecrovirus	Olive mild mosaic virus	295090	ssRNA(+)	plants	Plants
BC-0302413079|k141_41198.3	AY881628	28.89	Orthornavirae	Kitrinoviricota	Alsuviricetes	Martellivirales	Closteroviridae	Closterovirus	Grapevine leafroll-associated virus 2	64003	ssRNA(+)	plants	Plants
BC-0302413079|k141_4652.1	MN532677	88.69	Orthornavirae	Lenarviricota	Miaviricetes	Ourlivirales	Botourmiaviridae	Penoulivirus	Penoulivirus thetaplasmoparae	2956296	ssRNA(+)	other (specify)	Others
BC-0302413079|k141_5499.5	D11028	82.5	Orthornavirae	Kitrinoviricota	Tolucaviricetes	Tolivirales	Tombusviridae	Luteovirus	Barley yellow dwarf virus MAV	2169984	ssRNA(+)	plants	Plants
BC-0302413079|k141_55100.3	MN605479	58.68	Orthornavirae	Lenarviricota	Miaviricetes	Ourlivirales	Botourmiaviridae	Botoulivirus	Botoulivirus deltabotrytidis	2955520	ssRNA(+)	fungi	Fungi
BC-0302413079|k141_55276.5	AF039063	33	Orthornavirae	Lenarviricota	Amabiliviricetes	Wolframvirales	Narnaviridae	Narnavirus	Saccharomyces 20S RNA narnavirus	186772	ssRNA(+)	fungi	Fungi
BC-0302413079|k141_5662.4	X15511	43.56	Orthornavirae	Kitrinoviricota	Tolucaviricetes	Tolivirales	Tombusviridae	Tombusvirus	Cymbidium ringspot virus	12144	ssRNA(+)	plants	Plants
BC-0302413079|k141_58734.3	AF452884	43.37	Orthornavirae	Kitrinoviricota	Tolucaviricetes	Tolivirales	Tombusviridae	Betanecrovirus	Beet black scorch virus	196375	ssRNA(+)	plants	Plants
BC-0302413079|k141_60020.6	DQ399259	28.2	Orthornavirae	Kitrinoviricota	Alsuviricetes	Martellivirales	Closteroviridae	Ampelovirus	Pineapple mealybug wilt-associated virus 3	373861	ssRNA(+)	plants	Plants
BC-0302413079|k141_64262.5	U90136	29.93	Orthornavirae	Lenarviricota	Amabiliviricetes	Wolframvirales	Narnaviridae	Narnavirus	Saccharomyces 23S RNA narnavirus	198599	ssRNA(+)	fungi	Fungi
BC-0302413079|k141_67996.6	AY616760	37.17	Orthornavirae	Kitrinoviricota	Tolucaviricetes	Tolivirales	Tombusviridae	Alphanecrovirus	Olive mild mosaic virus	295090	ssRNA(+)	plants	Plants
BC-0302413079|k141_68048.5	KX578717	35.9	Orthornavirae	Kitrinoviricota	Alsuviricetes	Hepelivirales	Hepeviridae	Paslahepevirus	Paslahepevirus balayani	1678143	ssRNA(+)	vertebrates	Vertebrates	human
BC-0302413079|k141_68599.5	MN532614	69.64	Orthornavirae	Lenarviricota	Miaviricetes	Ourlivirales	Botourmiaviridae	Magoulivirus	Magoulivirus psiplasmoparae	2956171	ssRNA(+)	other (specify)	Others
BC-0302413079|k141_72344.5	AJ295949	29.37	Orthornavirae	Kitrinoviricota	Alsuviricetes	Martellivirales	Virgaviridae	Tobamovirus	Zucchini green mottle mosaic virus	111418	ssRNA(+)	plants	Plants
BC-0302413099|k141_10404.3	AF525933	28.16	Orthornavirae	Negarnaviricota	Milneviricetes	Serpentovirales	Aspiviridae	Ophiovirus	Ophiovirus mirafioriense	2170048	ssRNA(-)	plants	Plants
BC-0302413099|k141_17535.2	MK279481	59.11	Orthornavirae	Lenarviricota	Miaviricetes	Ourlivirales	Botourmiaviridae	Penoulivirus	Aspergillus penoulivirus	2843742	ssRNA(+)	fungi	Fungi
BC-0302413099|k141_1799.4	AY535016	33.14	Orthornavirae	Negarnaviricota	Milneviricetes	Serpentovirales	Aspiviridae	Ophiovirus	Ophiovirus lactucae	2170047	ssRNA(-)	plants	Plants
BC-0302413099|k141_19832.2	V01408	100	Orthornavirae	Kitrinoviricota	Alsuviricetes	Martellivirales	Virgaviridae	Tobamovirus	Tobacco mosaic virus	12242	ssRNA(+)	plants	Plants
BC-0302413099|k141_19837.3	AF484251	93.66	Orthornavirae	Kitrinoviricota	Alsuviricetes	Tymovirales	Alphaflexiviridae	Potexvirus	Pepino mosaic virus	112229	ssRNA(+)	plants	Plants
BC-0302413099|k141_30620.6	MK584842	57.98	Orthornavirae	Lenarviricota	Miaviricetes	Ourlivirales	Botourmiaviridae	Botoulivirus	Epicoccum botoulivirus	2844155	ssRNA(+)	fungi	Fungi
BC-0302413099|k141_38648.1	MN473199	76.13	Orthornavirae	Lenarviricota	Miaviricetes	Ourlivirales	Botourmiaviridae	Penoulivirus	Phoma penoulivirus	2845834	ssRNA(+)	fungi	Fungi
BC-0302413099|k141_41022.3	BK013776	48.15	Orthornavirae	Lenarviricota	Leviviricetes	Timlovirales	Steitzviridae	Cebevirus	Cebevirus agrenecus	2843922	ssRNA(+)	bacteria	Bacteria
BC-0302413099|k141_48286.3	X06728	100	Orthornavirae	Kitrinoviricota	Alsuviricetes	Tymovirales	Alphaflexiviridae	Potexvirus	White clover mosaic virus	12188	ssRNA(+)	plants	Plants
BC-0302413099|k141_55420.2	BK013403	38.67	Orthornavirae	Lenarviricota	Leviviricetes	Norzivirales	Atkinsviridae	Yekorevirus	Yekorevirus terrivivens	2846676	ssRNA(+)	bacteria	Bacteria
BC-0302413099|k141_629.6	M81413	100	Orthornavirae	Kitrinoviricota	Alsuviricetes	Martellivirales	Virgaviridae	Tobamovirus	Pepper mild mottle virus	12239	ssRNA(+)	plants	Plants	human
BC-0302413099|k141_63863.3	MG721540	62.5	Orthornavirae	Lenarviricota	Howeltoviricetes	Cryppavirales	Mitoviridae	Duamitovirus	Duamitovirus bevu1	2955768	ssRNA(+)	plants	Plants
BC-0302413099|k141_8560.4	EU081018	87.12	Orthornavirae	Kitrinoviricota	Tolucaviricetes	Tolivirales	Tombusviridae	Panicovirus	Cocksfoot mild mosaic virus	479060	ssRNA(+)	plants	Plants
BC-0302413101|k141_10119.3	JN117276	69.75	Orthornavirae	Pisuviricota	Duplopiviricetes	Durnavirales	Partitiviridae	Deltapartitivirus	Pepper cryptic virus 1	369643	dsRNA	plants	Plants
BC-0302413101|k141_10671.4	BK010429	54.31	Orthornavirae	Lenarviricota	Howeltoviricetes	Cryppavirales	Mitoviridae	Duamitovirus	Duamitovirus dapi1	2955778	ssRNA(+)	plants	Plants
BC-0302413101|k141_11084.4	D00915	33.62	Orthornavirae	Pisuviricota	Pisoniviricetes	Picornavirales	Secoviridae	Nepovirus	Grapevine fanleaf virus	12274	ssRNA(+)	plants	Plants
BC-0302413101|k141_11150.6	BK010429	53.04	Orthornavirae	Lenarviricota	Howeltoviricetes	Cryppavirales	Mitoviridae	Duamitovirus	Duamitovirus dapi1	2955778	ssRNA(+)	plants	Plants
BC-0302413101|k141_11232.3	KC811837	29.91	Orthornavirae	Pisuviricota	Pisoniviricetes	Picornavirales	Picornaviridae	Megrivirus	Megrivirus B	2170005	ssRNA(+)	vertebrates	Vertebrates	non_mammalia_vertebrates
BC-0302413101|k141_13304.5	MN532595	63.3	Orthornavirae	Lenarviricota	Miaviricetes	Ourlivirales	Botourmiaviridae	Magoulivirus	Magoulivirus deltaplasmoparae	2956155	ssRNA(+)	other (specify)	Others
BC-0302413101|k141_14271.6	AJ295948	29.14	Orthornavirae	Kitrinoviricota	Alsuviricetes	Martellivirales	Virgaviridae	Tobamovirus	Kyuri green mottle mosaic virus	111970	ssRNA(+)	plants	Plants
BC-0302413101|k141_21835.1	V01408	100	Orthornavirae	Kitrinoviricota	Alsuviricetes	Martellivirales	Virgaviridae	Tobamovirus	Tobacco mosaic virus	12242	ssRNA(+)	plants	Plants
BC-0302413101|k141_21925.2	AF092924	40	Orthornavirae	Pisuviricota	Pisoniviricetes	Picornavirales	Iflaviridae	Iflavirus	Sacbrood virus	89463	ssRNA(+)	invertebrates	Invertebrates
BC-0302413101|k141_23571.6	AY147260	32.69	Orthornavirae	Kitrinoviricota	Alsuviricetes	Tymovirales	Alphaflexiviridae	Sclerodarnavirus	Sclerotinia sclerotiorum debilitation-associated RNA virus	213034	ssRNA(+)	fungi	Fungi
BC-0302413101|k141_29942.6	MG721540	61.95	Orthornavirae	Lenarviricota	Howeltoviricetes	Cryppavirales	Mitoviridae	Duamitovirus	Duamitovirus bevu1	2955768	ssRNA(+)	plants	Plants
BC-0302413101|k141_39342.2	MN532662	97.44	Orthornavirae	Lenarviricota	Miaviricetes	Ourlivirales	Botourmiaviridae	Scleroulivirus	Scleroulivirus xiplasmoparae	2956422	ssRNA(+)	other (specify)	Others
BC-0302413101|k141_46209.3	AY830918	53.75	Orthornavirae	Kitrinoviricota	Tolucaviricetes	Tolivirales	Tombusviridae	Tombusvirus	Grapevine Algerian latent virus	208084	ssRNA(+)	plants	Plants
BC-0302413101|k141_51396.6	BK010429	54.39	Orthornavirae	Lenarviricota	Howeltoviricetes	Cryppavirales	Mitoviridae	Duamitovirus	Duamitovirus dapi1	2955778	ssRNA(+)	plants	Plants
BC-0302413101|k141_52197.5	FR687854	58.04	Orthornavirae	Pisuviricota	Duplopiviricetes	Durnavirales	Partitiviridae	Deltapartitivirus	Fig cryptic virus	882768	dsRNA	plants	Plants
BC-0302413101|k141_52771.5	AJ557804	58.75	Orthornavirae	Kitrinoviricota	Tolucaviricetes	Tolivirales	Tombusviridae	Aureusvirus	Johnsongrass chlorotic stripe mosaic virus	229149	ssRNA(+)	plants	Plants
BC-0302413101|k141_54649.5	AB017503	30.25	Orthornavirae	Kitrinoviricota	Alsuviricetes	Martellivirales	Virgaviridae	Tobamovirus	Wasabi mottle virus	1169032	ssRNA(+)	plants	Plants
BC-0302413101|k141_5621.6	BK013520	68.59	Orthornavirae	Lenarviricota	Leviviricetes	Timlovirales	Steitzviridae	Bahnicevirus	Bahnicevirus solicola	2843817	ssRNA(+)	bacteria	Bacteria
BC-0302413101|k141_57443.2	X82547	95.7	Orthornavirae	Kitrinoviricota	Alsuviricetes	Tymovirales	Betaflexiviridae	Capillovirus	Cherry virus A	42882	ssRNA(+)	plants	Plants
BC-0302413101|k141_63013.2	BK010429	51.3	Orthornavirae	Lenarviricota	Howeltoviricetes	Cryppavirales	Mitoviridae	Duamitovirus	Duamitovirus dapi1	2955778	ssRNA(+)	plants	Plants
BC-0302413101|k141_63845.4	AF452884	52.44	Orthornavirae	Kitrinoviricota	Tolucaviricetes	Tolivirales	Tombusviridae	Betanecrovirus	Beet black scorch virus	196375	ssRNA(+)	plants	Plants
BC-0302413101|k141_67111.1	FR687854	44.86	Orthornavirae	Pisuviricota	Duplopiviricetes	Durnavirales	Partitiviridae	Deltapartitivirus	Fig cryptic virus	882768	dsRNA	plants	Plants
BC-0302413101|k141_69088.2	AY881628	24.67	Orthornavirae	Kitrinoviricota	Alsuviricetes	Martellivirales	Closteroviridae	Closterovirus	Grapevine leafroll-associated virus 2	64003	ssRNA(+)	plants	Plants
BC-0302413101|k141_73763.6	X83964	53.33	Orthornavirae	Kitrinoviricota	Tolucaviricetes	Tolivirales	Tombusviridae	Avenavirus	Oat chlorotic stunt virus	146762	ssRNA	plants	Plants
BC-0302413101|k141_82994.4	MG721540	63.39	Orthornavirae	Lenarviricota	Howeltoviricetes	Cryppavirales	Mitoviridae	Duamitovirus	Duamitovirus bevu1	2955768	ssRNA(+)	plants	Plants
BC-0302413101|k141_87395.1	FR687854	70.8	Orthornavirae	Pisuviricota	Duplopiviricetes	Durnavirales	Partitiviridae	Deltapartitivirus	Fig cryptic virus	882768	dsRNA	plants	Plants
BC-0302413102|k141_118160.2	AB569997	63.54	Orthornavirae	Pisuviricota	Duplopiviricetes	Durnavirales	Partitiviridae	Alphapartitivirus	Rosellinia necatrix partitivirus 2	859651	dsRNA	fungi	Fungi
BC-0302413102|k141_126521.5	MK682513	27.94	Orthornavirae	Lenarviricota	Howeltoviricetes	Cryppavirales	Mitoviridae	Unuamitovirus	Unuamitovirus enmu1	2956593	ssRNA(+)	fungi	Fungi
BC-0302413102|k141_149966.2	BK010429	52.59	Orthornavirae	Lenarviricota	Howeltoviricetes	Cryppavirales	Mitoviridae	Duamitovirus	Duamitovirus dapi1	2955778	ssRNA(+)	plants	Plants
BC-0302413102|k141_155761.3	MK682513	31.71	Orthornavirae	Lenarviricota	Howeltoviricetes	Cryppavirales	Mitoviridae	Unuamitovirus	Unuamitovirus enmu1	2956593	ssRNA(+)	fungi	Fungi
BC-0302413102|k141_54462.5	LC195294	67.9	Orthornavirae	Pisuviricota	Duplopiviricetes	Durnavirales	Partitiviridae	Deltapartitivirus	Pepper cryptic virus 2	1050903	dsRNA	plants	Plants
BC-0302413102|k141_67862.4	MG721540	61.95	Orthornavirae	Lenarviricota	Howeltoviricetes	Cryppavirales	Mitoviridae	Duamitovirus	Duamitovirus bevu1	2955768	ssRNA(+)	plants	Plants
BC-0302413124|k141_14296.4	KC610514	60.83	Orthornavirae	Duplornaviricota	Chrymotiviricetes	Ghabrivirales	Totiviridae	Totivirus	Scheffersomyces segobiensis virus L	1300323	dsRNA	fungi	Fungi
BC-0302413124|k141_22337.5	AM040148	42.86	Orthornavirae	Pisuviricota	Duplopiviricetes	Durnavirales	Partitiviridae	Gammapartitivirus	Penicillium stoloniferum virus S	216371	dsRNA	fungi	Fungi
BC-0302413124|k141_30804.5	M81413	100	Orthornavirae	Kitrinoviricota	Alsuviricetes	Martellivirales	Virgaviridae	Tobamovirus	Pepper mild mottle virus	12239	ssRNA(+)	plants	Plants	human
BC-0302413124|k141_31237.4	AF150629	43.23	Orthornavirae	Pisuviricota	Pisoniviricetes	Picornavirales	Dicistroviridae	Aparavirus	Acute bee paralysis virus	92444	ssRNA(+)	invertebrates	Invertebrates
BC-0302413124|k141_32180.5	AJ781168	44.5	Orthornavirae	Pisuviricota	Duplopiviricetes	Durnavirales	Partitiviridae	Alphapartitivirus	Cherry chlorotic rusty spot associated partitivirus	284688	dsRNA	fungi	Fungi
BC-0302413124|k141_34962.3	AY089993	37.72	Orthornavirae	Pisuviricota	Duplopiviricetes	Durnavirales	Partitiviridae	Gammapartitivirus	Gremmeniella abietina RNA virus MS1	191436	dsRNA	fungi	Fungi
BC-0302413124|k141_51267.6	KR349343	32.11	Orthornavirae	Kitrinoviricota	Alsuviricetes	Tymovirales	Betaflexiviridae	Carlavirus	Atractylodes mottle virus	1702121	ssRNA(+)	plants	Plants
BC-0302413124|k141_53127.2	AJ781168	38.12	Orthornavirae	Pisuviricota	Duplopiviricetes	Durnavirales	Partitiviridae	Alphapartitivirus	Cherry chlorotic rusty spot associated partitivirus	284688	dsRNA	fungi	Fungi
BC-0302413124|k141_54030.5	AM087202	40.38	Orthornavirae	Pisuviricota	Duplopiviricetes	Durnavirales	Partitiviridae	Gammapartitivirus	Ophiostoma partitivirus 1	347482	dsRNA	fungi	Fungi
BC-0302413124|k141_5881.4	MN532622	75.96	Orthornavirae	Lenarviricota	Miaviricetes	Ourlivirales	Botourmiaviridae	Betascleroulivirus	Betascleroulivirus betaplasmoparae	2955478	ssRNA(+)	other (specify)	Others
BC-0302413523|k141_17431.5	M22445	33.42	Orthornavirae	Kitrinoviricota	Tolucaviricetes	Tolivirales	Tombusviridae	Betacarmovirus	Turnip crinkle virus	11988	ssRNA(+)	plants	Plants
BC-0302413523|k141_20726.5	MN532593	58.9	Orthornavirae	Lenarviricota	Miaviricetes	Ourlivirales	Botourmiaviridae	Magoulivirus	Magoulivirus betaplasmoparae	2956154	ssRNA(+)	other (specify)	Others
BC-0302413523|k141_23300.4	BK010429	44.83	Orthornavirae	Lenarviricota	Howeltoviricetes	Cryppavirales	Mitoviridae	Duamitovirus	Duamitovirus dapi1	2955778	ssRNA(+)	plants	Plants
BC-0302413523|k141_23336.4	MG256173	46.05	Orthornavirae	Lenarviricota	Howeltoviricetes	Cryppavirales	Mitoviridae	Duamitovirus	Duamitovirus gima1	2955783	ssRNA(+)	fungi	Fungi
BC-0302413523|k141_23489.2	MG256173	50	Orthornavirae	Lenarviricota	Howeltoviricetes	Cryppavirales	Mitoviridae	Duamitovirus	Duamitovirus gima1	2955783	ssRNA(+)	fungi	Fungi
BC-0302413523|k141_26335.4	MG721540	64.29	Orthornavirae	Lenarviricota	Howeltoviricetes	Cryppavirales	Mitoviridae	Duamitovirus	Duamitovirus bevu1	2955768	ssRNA(+)	plants	Plants
BC-0302413523|k141_27424.3	L16015	39.6	Orthornavirae	Kitrinoviricota	Tolucaviricetes	Tolivirales	Tombusviridae	Betacarmovirus	Cardamine chlorotic fleck virus	31711	ssRNA(+)	plants	Plants
BC-0302413523|k141_35590.6	KY357500	45.61	Orthornavirae	Lenarviricota	Howeltoviricetes	Cryppavirales	Mitoviridae	Unuamitovirus	Unuamitovirus agbi1	NA	ssRNA(+)	fungi	Fungi
BC-0302413523|k141_37271.1	MG256173	48.03	Orthornavirae	Lenarviricota	Howeltoviricetes	Cryppavirales	Mitoviridae	Duamitovirus	Duamitovirus gima1	2955783	ssRNA(+)	fungi	Fungi
BC-0302413523|k141_60117.5	X83964	46.71	Orthornavirae	Kitrinoviricota	Tolucaviricetes	Tolivirales	Tombusviridae	Avenavirus	Oat chlorotic stunt virus	146762	ssRNA	plants	Plants
BC-0302413523|k141_78630.6	MK804171	27.07	Orthornavirae	Kitrinoviricota	Alsuviricetes	Martellivirales	Kitaviridae	Cilevirus	Passion fruit green spot virus	989895	ssRNA(+)	plants	Plants
BC-0302413523|k141_79682.1	L13218	28.49	Orthornavirae	Duplornaviricota	Chrymotiviricetes	Ghabrivirales	Totiviridae	Giardiavirus	Giardia lamblia virus	29255	dsRNA	protozoa	Others
BC-0302413523|k141_81931.4	AY830918	54.04	Orthornavirae	Kitrinoviricota	Tolucaviricetes	Tolivirales	Tombusviridae	Tombusvirus	Grapevine Algerian latent virus	208084	ssRNA(+)	plants	Plants
BC-0302413523|k141_83018.3	BK010429	54.31	Orthornavirae	Lenarviricota	Howeltoviricetes	Cryppavirales	Mitoviridae	Duamitovirus	Duamitovirus dapi1	2955778	ssRNA(+)	plants	Plants
BC-0302413523|k141_85077.5	MG721540	48.24	Orthornavirae	Lenarviricota	Howeltoviricetes	Cryppavirales	Mitoviridae	Duamitovirus	Duamitovirus bevu1	2955768	ssRNA(+)	plants	Plants
BC-0302413523|k141_85300.5	MN605476	70.09	Orthornavirae	Lenarviricota	Miaviricetes	Ourlivirales	Botourmiaviridae	Betascleroulivirus	Betascleroulivirus botrytidis	2955479	ssRNA(+)	fungi	Fungi
BC-0302413525|k141_11879.3	EF634323	30.56	Orthornavirae	Duplornaviricota	Resentoviricetes	Reovirales	Spinareoviridae	Cypovirus	Cypovirus 5	205899	dsRNA	invertebrates	Invertebrates
BC-0302413525|k141_12037.5	MG721540	64.29	Orthornavirae	Lenarviricota	Howeltoviricetes	Cryppavirales	Mitoviridae	Duamitovirus	Duamitovirus bevu1	2955768	ssRNA(+)	plants	Plants
BC-0302413525|k141_1928.2	BK010429	54.88	Orthornavirae	Lenarviricota	Howeltoviricetes	Cryppavirales	Mitoviridae	Duamitovirus	Duamitovirus dapi1	2955778	ssRNA(+)	plants	Plants
BC-0302413538|k141_2215.2	BK010429	52.81	Orthornavirae	Lenarviricota	Howeltoviricetes	Cryppavirales	Mitoviridae	Duamitovirus	Duamitovirus dapi1	2955778	ssRNA(+)	plants	Plants
BC-0302413538|k141_2556.2	AY100482	48.82	Orthornavirae	Kitrinoviricota	Tolucaviricetes	Tolivirales	Tombusviridae	Tombusvirus	Eggplant mottled crinkle virus	270256	ssRNA(+)	plants	Plants
BC-0302413538|k141_3033.1	X94560	46.99	Orthornavirae	Kitrinoviricota	Tolucaviricetes	Tolivirales	Tombusviridae	Betanecrovirus	Leek white stripe virus	45224	ssRNA(+)	plants	Plants
BC-0302413538|k141_466.2	LC195294	71.61	Orthornavirae	Pisuviricota	Duplopiviricetes	Durnavirales	Partitiviridae	Deltapartitivirus	Pepper cryptic virus 2	1050903	dsRNA	plants	Plants
BC-0302413538|k141_546.4	MN532591	30.98	Orthornavirae	Lenarviricota	Miaviricetes	Ourlivirales	Botourmiaviridae	Betabotoulivirus	Betabotoulivirus gammaplasmoparae	2955437	ssRNA(+)	other (specify)	Others
BC-0302413538|k141_757.1	L07884	50.33	Orthornavirae	Kitrinoviricota	Tolucaviricetes	Tolivirales	Tombusviridae	Dianthovirus	Sweet clover necrotic mosaic virus	28348	ssRNA(+)	plants	Plants
BC-0302413540|k141_13787.2	HQ677625	38.18	Orthornavirae	Kitrinoviricota	Tolucaviricetes	Tolivirales	Tombusviridae	Alphacarmovirus	Honeysuckle ringspot virus	943272	ssRNA(+)	plants	Plants
BC-0302413540|k141_158.4	AB017503	30.43	Orthornavirae	Kitrinoviricota	Alsuviricetes	Martellivirales	Virgaviridae	Tobamovirus	Wasabi mottle virus	1169032	ssRNA(+)	plants	Plants
BC-0302413540|k141_16839.5	KC792591	25.59	Orthornavirae	Lenarviricota	Howeltoviricetes	Cryppavirales	Mitoviridae	Triamitovirus	Triamitovirus rhso1	2956548	ssRNA(+)	fungi	Fungi
BC-0302413540|k141_17622.4	U22521	28.36	Orthornavirae	Pisuviricota	Pisoniviricetes	Picornavirales	Picornaviridae	Enterovirus	Enterovirus A	138948	ssRNA(+)	vertebrates	Vertebrates	human
BC-0302413540|k141_18544.6	MN532604	60.19	Orthornavirae	Lenarviricota	Miaviricetes	Ourlivirales	Botourmiaviridae	Magoulivirus	Magoulivirus niplasmoparae	2956167	ssRNA(+)	other (specify)	Others
BC-0302413540|k141_20119.2	KX015962	34.51	Orthornavirae	Kitrinoviricota	Alsuviricetes	Tymovirales	Deltaflexiviridae	Deltaflexivirus	Fusarium deltaflexivirus 1	2169864	ssRNA(+)	fungi	Fungi
BC-0302413540|k141_24242.5	MK279481	65.77	Orthornavirae	Lenarviricota	Miaviricetes	Ourlivirales	Botourmiaviridae	Penoulivirus	Aspergillus penoulivirus	2843742	ssRNA(+)	fungi	Fungi
BC-0302413540|k141_24845.4	MN532612	73.15	Orthornavirae	Lenarviricota	Miaviricetes	Ourlivirales	Botourmiaviridae	Magoulivirus	Magoulivirus fiplasmoparae	2956158	ssRNA(+)	other (specify)	Others
BC-0302413540|k141_24862.4	LC413501	60.87	Orthornavirae	Lenarviricota	Miaviricetes	Ourlivirales	Botourmiaviridae	Penoulivirus	Pyricularia penoulivirus	2846014	ssRNA(+)	fungi	Fungi
BC-0302413540|k141_25254.1	MG256174	30.69	Orthornavirae	Lenarviricota	Howeltoviricetes	Cryppavirales	Mitoviridae	Duamitovirus	Duamitovirus gima2	2955784	ssRNA(+)	fungi	Fungi
BC-0302413540|k141_27346.4	KT598226	34.33	Orthornavirae	Kitrinoviricota	Alsuviricetes	Tymovirales	Deltaflexiviridae	Deltaflexivirus	Soybean-associated deltaflexivirus 1	2169866	ssRNA(+)	plants	Plants
BC-0302413540|k141_27604.2	LC195294	72.22	Orthornavirae	Pisuviricota	Duplopiviricetes	Durnavirales	Partitiviridae	Deltapartitivirus	Pepper cryptic virus 2	1050903	dsRNA	plants	Plants
BC-0302413540|k141_29316.3	MH536648	70.25	Orthornavirae	Pisuviricota	Duplopiviricetes	Durnavirales	Curvulaviridae	Orthocurvulavirus	Trichoderma harzianum orthocurvulavirus 1	2846570	dsRNA	fungi	Fungi
BC-0302413540|k141_30349.2	JF716350	48.11	Orthornavirae					Botybirnavirus	Botrytis porri botybirnavirus 1	1918014	dsRNA	fungi	Fungi
BC-0302413540|k141_30925.6	AY100482	35.54	Orthornavirae	Kitrinoviricota	Tolucaviricetes	Tolivirales	Tombusviridae	Tombusvirus	Eggplant mottled crinkle virus	270256	ssRNA(+)	plants	Plants
BC-0302413540|k141_31260.4	MK584842	64.35	Orthornavirae	Lenarviricota	Miaviricetes	Ourlivirales	Botourmiaviridae	Botoulivirus	Epicoccum botoulivirus	2844155	ssRNA(+)	fungi	Fungi
BC-0302413540|k141_31716.4	U30944	27.42	Orthornavirae	Kitrinoviricota	Alsuviricetes	Martellivirales	Virgaviridae	Tobamovirus	Youcai mosaic virus	228578	ssRNA(+)	plants	Plants
BC-0302413540|k141_32783.4	MN532616	57.63	Orthornavirae	Lenarviricota	Miaviricetes	Ourlivirales	Botourmiaviridae	Magoulivirus	Magoulivirus omegaplasmoparae	2956168	ssRNA(+)	other (specify)	Others
BC-0302413540|k141_3455.5	KT598226	34.56	Orthornavirae	Kitrinoviricota	Alsuviricetes	Tymovirales	Deltaflexiviridae	Deltaflexivirus	Soybean-associated deltaflexivirus 1	2169866	ssRNA(+)	plants	Plants
BC-0302413540|k141_40115.1	L16015	39.6	Orthornavirae	Kitrinoviricota	Tolucaviricetes	Tolivirales	Tombusviridae	Betacarmovirus	Cardamine chlorotic fleck virus	31711	ssRNA(+)	plants	Plants
BC-0302413540|k141_40280.1	J04692	56.1	Orthornavirae	Duplornaviricota	Chrymotiviricetes	Ghabrivirales	Totiviridae	Totivirus	Saccharomyces cerevisiae virus L-A	11008	dsRNA	fungi	Fungi
BC-0302413540|k141_40563.4	MN605476	82.69	Orthornavirae	Lenarviricota	Miaviricetes	Ourlivirales	Botourmiaviridae	Betascleroulivirus	Betascleroulivirus botrytidis	2955479	ssRNA(+)	fungi	Fungi
BC-0302413540|k141_42458.4	MN532614	72.64	Orthornavirae	Lenarviricota	Miaviricetes	Ourlivirales	Botourmiaviridae	Magoulivirus	Magoulivirus psiplasmoparae	2956171	ssRNA(+)	other (specify)	Others
BC-0302413540|k141_43580.4	AB573435	26.47	Orthornavirae	Kitrinoviricota	Alsuviricetes	Hepelivirales	Hepeviridae	Paslahepevirus	Paslahepevirus balayani	1678143	ssRNA(+)	vertebrates	Vertebrates	human
BC-0302413540|k141_44918.4	EF589670	59.48	Orthornavirae	Kitrinoviricota	Tolucaviricetes	Tolivirales	Tombusviridae	Aureusvirus	Maize white line mosaic virus	445227	ssRNA(+)	plants	Plants
BC-0302413540|k141_45890.4	MN532616	63.06	Orthornavirae	Lenarviricota	Miaviricetes	Ourlivirales	Botourmiaviridae	Magoulivirus	Magoulivirus omegaplasmoparae	2956168	ssRNA(+)	other (specify)	Others
BC-0302413540|k141_46701.6	KT598226	35.08	Orthornavirae	Kitrinoviricota	Alsuviricetes	Tymovirales	Deltaflexiviridae	Deltaflexivirus	Soybean-associated deltaflexivirus 1	2169866	ssRNA(+)	plants	Plants
BC-0302413540|k141_47415.3	MG721540	64.29	Orthornavirae	Lenarviricota	Howeltoviricetes	Cryppavirales	Mitoviridae	Duamitovirus	Duamitovirus bevu1	2955768	ssRNA(+)	plants	Plants
BC-0302413540|k141_47951.4	U22521	29.85	Orthornavirae	Pisuviricota	Pisoniviricetes	Picornavirales	Picornaviridae	Enterovirus	Enterovirus A	138948	ssRNA(+)	vertebrates	Vertebrates	human
BC-0302413540|k141_52644.5	MN532602	65	Orthornavirae	Lenarviricota	Miaviricetes	Ourlivirales	Botourmiaviridae	Magoulivirus	Magoulivirus lambdaplasmoparae	2956164	ssRNA(+)	other (specify)	Others
BC-0302413540|k141_53565.5	U90136	28.31	Orthornavirae	Lenarviricota	Amabiliviricetes	Wolframvirales	Narnaviridae	Narnavirus	Saccharomyces 23S RNA narnavirus	198599	ssRNA(+)	fungi	Fungi
BC-0302413540|k141_57717.1	BK010736	35.9	Orthornavirae	Lenarviricota	Howeltoviricetes	Cryppavirales	Mitoviridae	Unuamitovirus	Unuamitovirus enmu8	2956600	ssRNA(+)	fungi	Fungi
BC-0302413540|k141_58939.5	M22445	33.68	Orthornavirae	Kitrinoviricota	Tolucaviricetes	Tolivirales	Tombusviridae	Betacarmovirus	Turnip crinkle virus	11988	ssRNA(+)	plants	Plants
BC-0302413540|k141_62120.3	AJ295949	28	Orthornavirae	Kitrinoviricota	Alsuviricetes	Martellivirales	Virgaviridae	Tobamovirus	Zucchini green mottle mosaic virus	111418	ssRNA(+)	plants	Plants
BC-0302413540|k141_66096.5	MN532604	66.96	Orthornavirae	Lenarviricota	Miaviricetes	Ourlivirales	Botourmiaviridae	Magoulivirus	Magoulivirus niplasmoparae	2956167	ssRNA(+)	other (specify)	Others
BC-0302413540|k141_66244.5	KT921181	33.09	Orthornavirae	Lenarviricota	Howeltoviricetes	Cryppavirales	Mitoviridae	Unuamitovirus	Unuamitovirus crri3	2956589	ssRNA(+)	fungi	Fungi
BC-0302413540|k141_66817.5	MN532626	61.9	Orthornavirae	Lenarviricota	Miaviricetes	Ourlivirales	Botourmiaviridae	Betascleroulivirus	Betascleroulivirus epsilonplasmoparae	2955481	ssRNA(+)	other (specify)	Others
BC-0302413540|k141_68398.6	AJ557804	54.04	Orthornavirae	Kitrinoviricota	Tolucaviricetes	Tolivirales	Tombusviridae	Aureusvirus	Johnsongrass chlorotic stripe mosaic virus	229149	ssRNA(+)	plants	Plants
BC-0302413540|k141_68897.4	LC195294	50.46	Orthornavirae	Pisuviricota	Duplopiviricetes	Durnavirales	Partitiviridae	Deltapartitivirus	Pepper cryptic virus 2	1050903	dsRNA	plants	Plants
BC-0302413540|k141_70016.1	BK013438	41.83	Orthornavirae	Lenarviricota	Leviviricetes	Timlovirales	Steitzviridae	Stehnavirus	Stehnavirus chorovicinum	2846386	ssRNA(+)	bacteria	Bacteria
BC-0302413540|k141_7128.4	MF362666	26.74	Orthornavirae	Kitrinoviricota	Alsuviricetes	Martellivirales	Endornaviridae	Alphaendornavirus	Helianthus annuus alphaendornavirus	2184469	ssRNA(+)	plants	Plants
BC-0302413540|k141_72256.5	MN532607	35.8	Orthornavirae	Lenarviricota	Miaviricetes	Ourlivirales	Botourmiaviridae	Magoulivirus	Magoulivirus piplasmoparae	2956170	ssRNA(+)	other (specify)	Others
BC-0302413540|k141_73478.3	KT598226	34.85	Orthornavirae	Kitrinoviricota	Alsuviricetes	Tymovirales	Deltaflexiviridae	Deltaflexivirus	Soybean-associated deltaflexivirus 1	2169866	ssRNA(+)	plants	Plants
BC-0302413540|k141_75248.4	MK584831	32.37	Orthornavirae	Lenarviricota	Howeltoviricetes	Cryppavirales	Mitoviridae	Duamitovirus	Duamitovirus nepa1	2955791	ssRNA(+)	fungi	Fungi
BC-0302413540|k141_77144.1	KX015962	36.56	Orthornavirae	Kitrinoviricota	Alsuviricetes	Tymovirales	Deltaflexiviridae	Deltaflexivirus	Fusarium deltaflexivirus 1	2169864	ssRNA(+)	fungi	Fungi
BC-0302413540|k141_77232.1	BK010429	54.31	Orthornavirae	Lenarviricota	Howeltoviricetes	Cryppavirales	Mitoviridae	Duamitovirus	Duamitovirus dapi1	2955778	ssRNA(+)	plants	Plants
BC-0302413540|k141_8122.2	AY535016	31.98	Orthornavirae	Negarnaviricota	Milneviricetes	Serpentovirales	Aspiviridae	Ophiovirus	Ophiovirus lactucae	2170047	ssRNA(-)	plants	Plants
BC-0302413542|k141_100488.2	X83964	46.71	Orthornavirae	Kitrinoviricota	Tolucaviricetes	Tolivirales	Tombusviridae	Avenavirus	Oat chlorotic stunt virus	146762	ssRNA	plants	Plants
BC-0302413542|k141_105352.4	X02986	31.62	Orthornavirae	Kitrinoviricota	Tolucaviricetes	Tolivirales	Tombusviridae	Alphacarmovirus	Carnation mottle virus	11986	ssRNA(+)	plants	Plants
BC-0302413542|k141_16506.2	BK010736	35.9	Orthornavirae	Lenarviricota	Howeltoviricetes	Cryppavirales	Mitoviridae	Unuamitovirus	Unuamitovirus enmu8	2956600	ssRNA(+)	fungi	Fungi
BC-0302413542|k141_1795.1	MG256173	51.35	Orthornavirae	Lenarviricota	Howeltoviricetes	Cryppavirales	Mitoviridae	Duamitovirus	Duamitovirus gima1	2955783	ssRNA(+)	fungi	Fungi
BC-0302413542|k141_24067.1	BK010429	54.31	Orthornavirae	Lenarviricota	Howeltoviricetes	Cryppavirales	Mitoviridae	Duamitovirus	Duamitovirus dapi1	2955778	ssRNA(+)	plants	Plants
BC-0302413542|k141_26666.4	MG721540	64.29	Orthornavirae	Lenarviricota	Howeltoviricetes	Cryppavirales	Mitoviridae	Duamitovirus	Duamitovirus bevu1	2955768	ssRNA(+)	plants	Plants
BC-0302413542|k141_32844.2	MN532606	26.32	Orthornavirae	Lenarviricota	Miaviricetes	Ourlivirales	Botourmiaviridae	Magoulivirus	Magoulivirus omicronplasmoparae	2956169	ssRNA(+)	other (specify)	Others
BC-0302413542|k141_47462.1	JX197071	40.61	Orthornavirae	Kitrinoviricota	Tolucaviricetes	Tolivirales	Tombusviridae	Tombusvirus	Moroccan pepper virus	208086	ssRNA(+)	plants	Plants
BC-0302413542|k141_521.4	MG721540	62.5	Orthornavirae	Lenarviricota	Howeltoviricetes	Cryppavirales	Mitoviridae	Duamitovirus	Duamitovirus bevu1	2955768	ssRNA(+)	plants	Plants
BC-0302413542|k141_59076.2	BK010429	56.99	Orthornavirae	Lenarviricota	Howeltoviricetes	Cryppavirales	Mitoviridae	Duamitovirus	Duamitovirus dapi1	2955778	ssRNA(+)	plants	Plants
BC-0302413542|k141_60355.6	MK605686	70	Orthornavirae	Kitrinoviricota	Alsuviricetes	Tymovirales	Gammaflexiviridae	Xylavirus	Xylavirus EntGFV-2	2956703	ssRNA(+)	fungi	Fungi
BC-0302413542|k141_73836.3	MG256173	48.03	Orthornavirae	Lenarviricota	Howeltoviricetes	Cryppavirales	Mitoviridae	Duamitovirus	Duamitovirus gima1	2955783	ssRNA(+)	fungi	Fungi
BC-0302413542|k141_74522.5	D86123	48.76	Orthornavirae	Kitrinoviricota	Tolucaviricetes	Tolivirales	Tombusviridae	Betacarmovirus	Japanese iris necrotic ring virus	77344	ssRNA(+)	plants	Plants
BC-0302413542|k141_7531.3	MK372894	40.99	Orthornavirae	Lenarviricota	Howeltoviricetes	Cryppavirales	Mitoviridae	Duamitovirus	Duamitovirus rhso25	2955803	ssRNA(+)	fungi	Fungi
BC-0302413542|k141_75441.6	MN532602	57.41	Orthornavirae	Lenarviricota	Miaviricetes	Ourlivirales	Botourmiaviridae	Magoulivirus	Magoulivirus lambdaplasmoparae	2956164	ssRNA(+)	other (specify)	Others
BC-0302413542|k141_76012.2	MG020024	26.97	Orthornavirae	Kitrinoviricota	Alsuviricetes	Hepelivirales	Hepeviridae	Rocahepevirus	Rocahepevirus eothenomi	NA	ssRNA(+)	vertebrates	Vertebrates
BC-0302413542|k141_8185.1	MG256173	46.05	Orthornavirae	Lenarviricota	Howeltoviricetes	Cryppavirales	Mitoviridae	Duamitovirus	Duamitovirus gima1	2955783	ssRNA(+)	fungi	Fungi
BC-0302413542|k141_89391.3	MK804171	27.07	Orthornavirae	Kitrinoviricota	Alsuviricetes	Martellivirales	Kitaviridae	Cilevirus	Passion fruit green spot virus	989895	ssRNA(+)	plants	Plants
BC-0302413542|k141_95474.2	MK372894	46.95	Orthornavirae	Lenarviricota	Howeltoviricetes	Cryppavirales	Mitoviridae	Duamitovirus	Duamitovirus rhso25	2955803	ssRNA(+)	fungi	Fungi
BC-0302413546|k141_13309.4	BK010429	45.69	Orthornavirae	Lenarviricota	Howeltoviricetes	Cryppavirales	Mitoviridae	Duamitovirus	Duamitovirus dapi1	2955778	ssRNA(+)	plants	Plants
BC-0302413546|k141_14403.2	BK010429	55.91	Orthornavirae	Lenarviricota	Howeltoviricetes	Cryppavirales	Mitoviridae	Duamitovirus	Duamitovirus dapi1	2955778	ssRNA(+)	plants	Plants
BC-0302413546|k141_14501.4	BK010429	48.05	Orthornavirae	Lenarviricota	Howeltoviricetes	Cryppavirales	Mitoviridae	Duamitovirus	Duamitovirus dapi1	2955778	ssRNA(+)	plants	Plants
BC-0302413546|k141_9476.6	MN386962	60.18	Orthornavirae	Lenarviricota	Miaviricetes	Ourlivirales	Botourmiaviridae	Penoulivirus	Penoulivirus malus	2956295	ssRNA(+)	plants	Plants
BC-0302413555|k141_104430.3	MN532657	66.67	Orthornavirae	Lenarviricota	Miaviricetes	Ourlivirales	Botourmiaviridae	Scleroulivirus	Scleroulivirus iotaplasmoparae	2956411	ssRNA(+)	other (specify)	Others
BC-0302413555|k141_110371.6	MN473199	72.73	Orthornavirae	Lenarviricota	Miaviricetes	Ourlivirales	Botourmiaviridae	Penoulivirus	Phoma penoulivirus	2845834	ssRNA(+)	fungi	Fungi
BC-0302413555|k141_11460.4	MN532611	62.04	Orthornavirae	Lenarviricota	Miaviricetes	Ourlivirales	Botourmiaviridae	Magoulivirus	Magoulivirus ipsilonplasmoparae	2956161	ssRNA(+)	other (specify)	Others
BC-0302413555|k141_115220.6	MN532611	67.89	Orthornavirae	Lenarviricota	Miaviricetes	Ourlivirales	Botourmiaviridae	Magoulivirus	Magoulivirus ipsilonplasmoparae	2956161	ssRNA(+)	other (specify)	Others
BC-0302413555|k141_116000.2	D55668	34.78	Orthornavirae	Pisuviricota	Duplopiviricetes	Durnavirales	Partitiviridae	Gammapartitivirus	Fusarium solani virus 1	1511847	dsRNA	fungi	Fungi
BC-0302413555|k141_118494.2	MN043682	32.81	Orthornavirae	Lenarviricota	Howeltoviricetes	Cryppavirales	Mitoviridae	Triamitovirus	Triamitovirus gesu1	2956545	ssRNA(+)	fungi	Fungi
BC-0302413555|k141_119630.5	MN532665	61.54	Orthornavirae	Lenarviricota	Miaviricetes	Ourlivirales	Botourmiaviridae	Scleroulivirus	Scleroulivirus rhoplasmoparae	2956419	ssRNA(+)	other (specify)	Others
BC-0302413555|k141_119856.5	MK279481	64.86	Orthornavirae	Lenarviricota	Miaviricetes	Ourlivirales	Botourmiaviridae	Penoulivirus	Aspergillus penoulivirus	2843742	ssRNA(+)	fungi	Fungi
BC-0302413555|k141_119901.1	MN532665	62.71	Orthornavirae	Lenarviricota	Miaviricetes	Ourlivirales	Botourmiaviridae	Scleroulivirus	Scleroulivirus rhoplasmoparae	2956419	ssRNA(+)	other (specify)	Others
BC-0302413555|k141_120073.4	MK507958	61.74	Orthornavirae	Lenarviricota	Miaviricetes	Ourlivirales	Botourmiaviridae	Penoulivirus	Magnaporthe penoulivirus	2845557	ssRNA(+)	fungi	Fungi
BC-0302413555|k141_122651.3	KT598226	33.58	Orthornavirae	Kitrinoviricota	Alsuviricetes	Tymovirales	Deltaflexiviridae	Deltaflexivirus	Soybean-associated deltaflexivirus 1	2169866	ssRNA(+)	plants	Plants
BC-0302413555|k141_128598.5	MN585278	78.77	Orthornavirae	Negarnaviricota	Ellioviricetes	Bunyavirales	Discoviridae	Orthodiscovirus	Orthodiscovirus hispaniae	2956243	ssRNA(-)	other (specify)	Others
BC-0302413555|k141_128880.2	BK010429	55.91	Orthornavirae	Lenarviricota	Howeltoviricetes	Cryppavirales	Mitoviridae	Duamitovirus	Duamitovirus dapi1	2955778	ssRNA(+)	plants	Plants
BC-0302413555|k141_132022.6	MN532607	35.8	Orthornavirae	Lenarviricota	Miaviricetes	Ourlivirales	Botourmiaviridae	Magoulivirus	Magoulivirus piplasmoparae	2956170	ssRNA(+)	other (specify)	Others
BC-0302413555|k141_14664.2	D55668	66.86	Orthornavirae	Pisuviricota	Duplopiviricetes	Durnavirales	Partitiviridae	Gammapartitivirus	Fusarium solani virus 1	1511847	dsRNA	fungi	Fungi
BC-0302413555|k141_15778.4	MK584842	31.43	Orthornavirae	Lenarviricota	Miaviricetes	Ourlivirales	Botourmiaviridae	Botoulivirus	Epicoccum botoulivirus	2844155	ssRNA(+)	fungi	Fungi
BC-0302413555|k141_18278.6	MN532665	61.54	Orthornavirae	Lenarviricota	Miaviricetes	Ourlivirales	Botourmiaviridae	Scleroulivirus	Scleroulivirus rhoplasmoparae	2956419	ssRNA(+)	other (specify)	Others
BC-0302413555|k141_183.4	MN532606	26.15	Orthornavirae	Lenarviricota	Miaviricetes	Ourlivirales	Botourmiaviridae	Magoulivirus	Magoulivirus omicronplasmoparae	2956169	ssRNA(+)	other (specify)	Others
BC-0302413555|k141_18751.3	MN532656	63.3	Orthornavirae	Lenarviricota	Miaviricetes	Ourlivirales	Botourmiaviridae	Scleroulivirus	Scleroulivirus thetaplasmoparae	2956421	ssRNA(+)	other (specify)	Others
BC-0302413555|k141_18761.1	MN532595	57.27	Orthornavirae	Lenarviricota	Miaviricetes	Ourlivirales	Botourmiaviridae	Magoulivirus	Magoulivirus deltaplasmoparae	2956155	ssRNA(+)	other (specify)	Others
BC-0302413555|k141_21838.6	MN532614	23.97	Orthornavirae	Lenarviricota	Miaviricetes	Ourlivirales	Botourmiaviridae	Magoulivirus	Magoulivirus psiplasmoparae	2956171	ssRNA(+)	other (specify)	Others
BC-0302413555|k141_22436.2	MN532594	65.71	Orthornavirae	Lenarviricota	Miaviricetes	Ourlivirales	Botourmiaviridae	Magoulivirus	Magoulivirus gammaplasmoparae	2956159	ssRNA(+)	other (specify)	Others
BC-0302413555|k141_23097.4	MN532665	62.07	Orthornavirae	Lenarviricota	Miaviricetes	Ourlivirales	Botourmiaviridae	Scleroulivirus	Scleroulivirus rhoplasmoparae	2956419	ssRNA(+)	other (specify)	Others
BC-0302413555|k141_2559.5	MN473199	73.64	Orthornavirae	Lenarviricota	Miaviricetes	Ourlivirales	Botourmiaviridae	Penoulivirus	Phoma penoulivirus	2845834	ssRNA(+)	fungi	Fungi
BC-0302413555|k141_25860.3	MN473199	74.11	Orthornavirae	Lenarviricota	Miaviricetes	Ourlivirales	Botourmiaviridae	Penoulivirus	Phoma penoulivirus	2845834	ssRNA(+)	fungi	Fungi
BC-0302413555|k141_27231.2	MN532613	47.66	Orthornavirae	Lenarviricota	Miaviricetes	Ourlivirales	Botourmiaviridae	Magoulivirus	Magoulivirus jiplasmoparae	2956162	ssRNA(+)	other (specify)	Others
BC-0302413555|k141_30576.3	MN532614	70.75	Orthornavirae	Lenarviricota	Miaviricetes	Ourlivirales	Botourmiaviridae	Magoulivirus	Magoulivirus psiplasmoparae	2956171	ssRNA(+)	other (specify)	Others
BC-0302413555|k141_32985.1	MN532632	57.41	Orthornavirae	Lenarviricota	Miaviricetes	Ourlivirales	Botourmiaviridae	Epsilonscleroulivirus	Epsilonscleroulivirus plasmoparae	2955871	ssRNA(+)	other (specify)	Others
BC-0302413555|k141_33387.1	MN532591	31.72	Orthornavirae	Lenarviricota	Miaviricetes	Ourlivirales	Botourmiaviridae	Betabotoulivirus	Betabotoulivirus gammaplasmoparae	2955437	ssRNA(+)	other (specify)	Others
BC-0302413555|k141_34947.3	LC413502	66.04	Orthornavirae	Lenarviricota	Miaviricetes	Ourlivirales	Botourmiaviridae	Betascleroulivirus	Betascleroulivirus pyriculariae	2846015	ssRNA(+)	fungi	Fungi
BC-0302413555|k141_37641.5	MN605477	71.3	Orthornavirae	Lenarviricota	Miaviricetes	Ourlivirales	Botourmiaviridae	Botoulivirus	Botoulivirus betabotrytidis	2955518	ssRNA(+)	fungi	Fungi
BC-0302413555|k141_43300.1	MF375889	26.61	Orthornavirae	Lenarviricota	Miaviricetes	Ourlivirales	Botourmiaviridae	Betabotoulivirus	Betabotoulivirus entoleucae	2844153	ssRNA(+)	fungi	Fungi
BC-0302413555|k141_44008.5	BK010429	53.01	Orthornavirae	Lenarviricota	Howeltoviricetes	Cryppavirales	Mitoviridae	Duamitovirus	Duamitovirus dapi1	2955778	ssRNA(+)	plants	Plants
BC-0302413555|k141_45330.2	AY100482	48.82	Orthornavirae	Kitrinoviricota	Tolucaviricetes	Tolivirales	Tombusviridae	Tombusvirus	Eggplant mottled crinkle virus	270256	ssRNA(+)	plants	Plants
BC-0302413555|k141_45872.3	MN532648	27.89	Orthornavirae	Lenarviricota	Miaviricetes	Ourlivirales	Botourmiaviridae	Botoulivirus	Botoulivirus zetaplasmoparae	2955530	ssRNA(+)	other (specify)	Others
BC-0302413555|k141_4920.1	AF525933	27.91	Orthornavirae	Negarnaviricota	Milneviricetes	Serpentovirales	Aspiviridae	Ophiovirus	Ophiovirus mirafioriense	2170048	ssRNA(-)	plants	Plants
BC-0302413555|k141_51011.5	AY089993	84.68	Orthornavirae	Pisuviricota	Duplopiviricetes	Durnavirales	Partitiviridae	Gammapartitivirus	Gremmeniella abietina RNA virus MS1	191436	dsRNA	fungi	Fungi
BC-0302413555|k141_54707.3	MT353902	28.57	Orthornavirae	Negarnaviricota	Ellioviricetes	Bunyavirales	Phenuiviridae	Laulavirus	Grapevine laulavirus 4	2844686	ssRNA(-)	fungi	Fungi
BC-0302413555|k141_54721.1	LC195294	72.22	Orthornavirae	Pisuviricota	Duplopiviricetes	Durnavirales	Partitiviridae	Deltapartitivirus	Pepper cryptic virus 2	1050903	dsRNA	plants	Plants
BC-0302413555|k141_54852.4	MN532595	58.26	Orthornavirae	Lenarviricota	Miaviricetes	Ourlivirales	Botourmiaviridae	Magoulivirus	Magoulivirus deltaplasmoparae	2956155	ssRNA(+)	other (specify)	Others
BC-0302413555|k141_58834.4	BK010429	56.99	Orthornavirae	Lenarviricota	Howeltoviricetes	Cryppavirales	Mitoviridae	Duamitovirus	Duamitovirus dapi1	2955778	ssRNA(+)	plants	Plants
BC-0302413555|k141_60759.6	MK542706	28.7	Orthornavirae	Lenarviricota	Miaviricetes	Ourlivirales	Botourmiaviridae	Magoulivirus	Colletotrichum magoulivirus	2843999	ssRNA(+)	fungi	Fungi
BC-0302413555|k141_64553.1	U90136	41.08	Orthornavirae	Lenarviricota	Amabiliviricetes	Wolframvirales	Narnaviridae	Narnavirus	Saccharomyces 23S RNA narnavirus	198599	ssRNA(+)	fungi	Fungi
BC-0302413555|k141_65418.2	MF142458	73.91	Orthornavirae	Negarnaviricota	Ellioviricetes	Bunyavirales	Discoviridae	Orthodiscovirus	Orthodiscovirus missouriense	2956245	ssRNA(-)	fungi	Fungi
BC-0302413555|k141_67286.1	MN736966	61.4	Orthornavirae	Lenarviricota	Miaviricetes	Ourlivirales	Botourmiaviridae	Scleroulivirus	Scleroulivirus oidiodendronae	2956416	ssRNA(+)	fungi	Fungi
BC-0302413555|k141_6779.4	BK013520	70.59	Orthornavirae	Lenarviricota	Leviviricetes	Timlovirales	Steitzviridae	Bahnicevirus	Bahnicevirus solicola	2843817	ssRNA(+)	bacteria	Bacteria
BC-0302413555|k141_68206.3	MN532616	55.22	Orthornavirae	Lenarviricota	Miaviricetes	Ourlivirales	Botourmiaviridae	Magoulivirus	Magoulivirus omegaplasmoparae	2956168	ssRNA(+)	other (specify)	Others
BC-0302413555|k141_69551.2	MN473199	73.64	Orthornavirae	Lenarviricota	Miaviricetes	Ourlivirales	Botourmiaviridae	Penoulivirus	Phoma penoulivirus	2845834	ssRNA(+)	fungi	Fungi
BC-0302413555|k141_69607.6	MN532594	64.6	Orthornavirae	Lenarviricota	Miaviricetes	Ourlivirales	Botourmiaviridae	Magoulivirus	Magoulivirus gammaplasmoparae	2956159	ssRNA(+)	other (specify)	Others
BC-0302413555|k141_70616.2	MN532613	49.02	Orthornavirae	Lenarviricota	Miaviricetes	Ourlivirales	Botourmiaviridae	Magoulivirus	Magoulivirus jiplasmoparae	2956162	ssRNA(+)	other (specify)	Others
BC-0302413555|k141_75831.5	MG887760	51.18	Orthornavirae	Duplornaviricota	Chrymotiviricetes	Ghabrivirales	Chrysoviridae	Alphachrysovirus	Alphachrysovirus penicillii	2955246	dsRNA	fungi	Fungi
BC-0302413555|k141_76881.5	AF039063	27.94	Orthornavirae	Lenarviricota	Amabiliviricetes	Wolframvirales	Narnaviridae	Narnavirus	Saccharomyces 20S RNA narnavirus	186772	ssRNA(+)	fungi	Fungi
BC-0302413555|k141_80822.6	MN532659	62.28	Orthornavirae	Lenarviricota	Miaviricetes	Ourlivirales	Botourmiaviridae	Scleroulivirus	Scleroulivirus lambdaplasmoparae	2956413	ssRNA(+)	other (specify)	Others
BC-0302413555|k141_90563.6	MN532616	81.72	Orthornavirae	Lenarviricota	Miaviricetes	Ourlivirales	Botourmiaviridae	Magoulivirus	Magoulivirus omegaplasmoparae	2956168	ssRNA(+)	other (specify)	Others
BC-0302413555|k141_91209.3	KT598226	34.11	Orthornavirae	Kitrinoviricota	Alsuviricetes	Tymovirales	Deltaflexiviridae	Deltaflexivirus	Soybean-associated deltaflexivirus 1	2169866	ssRNA(+)	plants	Plants
BC-0302413555|k141_91383.2	KT598226	34.88	Orthornavirae	Kitrinoviricota	Alsuviricetes	Tymovirales	Deltaflexiviridae	Deltaflexivirus	Soybean-associated deltaflexivirus 1	2169866	ssRNA(+)	plants	Plants
BC-0302413555|k141_92081.4	MN736966	63.39	Orthornavirae	Lenarviricota	Miaviricetes	Ourlivirales	Botourmiaviridae	Scleroulivirus	Scleroulivirus oidiodendronae	2956416	ssRNA(+)	fungi	Fungi
BC-0302413555|k141_94405.6	MN532627	67.35	Orthornavirae	Lenarviricota	Miaviricetes	Ourlivirales	Botourmiaviridae	Betascleroulivirus	Betascleroulivirus zetaplasmoparae	2955489	ssRNA(+)	other (specify)	Others
BC-0302413555|k141_97204.6	MN532601	56.9	Orthornavirae	Lenarviricota	Miaviricetes	Ourlivirales	Botourmiaviridae	Magoulivirus	Magoulivirus kappaplasmoparae	2956163	ssRNA(+)	other (specify)	Others
BC-0302413555|k141_97627.4	J04357	49.02	Orthornavirae	Kitrinoviricota	Tolucaviricetes	Tolivirales	Tombusviridae	Dianthovirus	Red clover necrotic mosaic virus	12267	ssRNA(+)	plants	Plants
BC-0302413555|k141_98469.5	MN532655	68.47	Orthornavirae	Lenarviricota	Miaviricetes	Ourlivirales	Botourmiaviridae	Scleroulivirus	Scleroulivirus etaplasmoparae	2956409	ssRNA(+)	other (specify)	Others
BC-0302413555|k141_99549.6	MN532653	56.91	Orthornavirae	Lenarviricota	Miaviricetes	Ourlivirales	Botourmiaviridae	Scleroulivirus	Scleroulivirus zetaplasmoparae	2956423	ssRNA(+)	other (specify)	Others
BC-0302413570|k141_18804.5	BK010429	54.31	Orthornavirae	Lenarviricota	Howeltoviricetes	Cryppavirales	Mitoviridae	Duamitovirus	Duamitovirus dapi1	2955778	ssRNA(+)	plants	Plants
BC-0302413570|k141_21156.4	MK584848	26.97	Orthornavirae	Lenarviricota	Miaviricetes	Ourlivirales	Botourmiaviridae	Betabotoulivirus	Betabotoulivirus phaeoacremonium	2845805	ssRNA(+)	fungi	Fungi
BC-0302413570|k141_27479.6	BK010429	44.83	Orthornavirae	Lenarviricota	Howeltoviricetes	Cryppavirales	Mitoviridae	Duamitovirus	Duamitovirus dapi1	2955778	ssRNA(+)	plants	Plants
BC-0302413570|k141_34593.2	LC195294	72.22	Orthornavirae	Pisuviricota	Duplopiviricetes	Durnavirales	Partitiviridae	Deltapartitivirus	Pepper cryptic virus 2	1050903	dsRNA	plants	Plants
BC-0302413570|k141_36599.4	J04692	58.44	Orthornavirae	Duplornaviricota	Chrymotiviricetes	Ghabrivirales	Totiviridae	Totivirus	Saccharomyces cerevisiae virus L-A	11008	dsRNA	fungi	Fungi
BC-0302413570|k141_42394.3	FM881900	24.89	Orthornavirae	Kitrinoviricota	Alsuviricetes	Martellivirales	Bromoviridae	Cucumovirus	Gayfeather mild mottle virus	578305	ssRNA(+)	plants	Plants
BC-0302413570|k141_44051.3	BK010429	56.99	Orthornavirae	Lenarviricota	Howeltoviricetes	Cryppavirales	Mitoviridae	Duamitovirus	Duamitovirus dapi1	2955778	ssRNA(+)	plants	Plants
BC-0302413570|k141_50999.4	MG256173	47.37	Orthornavirae	Lenarviricota	Howeltoviricetes	Cryppavirales	Mitoviridae	Duamitovirus	Duamitovirus gima1	2955783	ssRNA(+)	fungi	Fungi
BC-0302413570|k141_7662.6	HQ389540	28.69	Orthornavirae	Kitrinoviricota	Alsuviricetes	Martellivirales	Virgaviridae	Tobamovirus	Passion fruit mosaic virus	1032457	ssRNA(+)	plants	Plants
BC-0302413588|k141_13206.2	BK010429	56.99	Orthornavirae	Lenarviricota	Howeltoviricetes	Cryppavirales	Mitoviridae	Duamitovirus	Duamitovirus dapi1	2955778	ssRNA(+)	plants	Plants
BC-0302413588|k141_4170.5	BK010429	47.4	Orthornavirae	Lenarviricota	Howeltoviricetes	Cryppavirales	Mitoviridae	Duamitovirus	Duamitovirus dapi1	2955778	ssRNA(+)	plants	Plants
BC-0302413588|k141_4436.6	BK010429	44.83	Orthornavirae	Lenarviricota	Howeltoviricetes	Cryppavirales	Mitoviridae	Duamitovirus	Duamitovirus dapi1	2955778	ssRNA(+)	plants	Plants
BC-0302413675|k141_103924.3	D55668	30.43	Orthornavirae	Pisuviricota	Duplopiviricetes	Durnavirales	Partitiviridae	Gammapartitivirus	Fusarium solani virus 1	1511847	dsRNA	fungi	Fungi
BC-0302413675|k141_104395.6	MF375889	25.69	Orthornavirae	Lenarviricota	Miaviricetes	Ourlivirales	Botourmiaviridae	Betabotoulivirus	Betabotoulivirus entoleucae	2844153	ssRNA(+)	fungi	Fungi
BC-0302413675|k141_108015.2	MN532632	60.66	Orthornavirae	Lenarviricota	Miaviricetes	Ourlivirales	Botourmiaviridae	Epsilonscleroulivirus	Epsilonscleroulivirus plasmoparae	2955871	ssRNA(+)	other (specify)	Others
BC-0302413675|k141_109653.6	AF039063	27.94	Orthornavirae	Lenarviricota	Amabiliviricetes	Wolframvirales	Narnaviridae	Narnavirus	Saccharomyces 20S RNA narnavirus	186772	ssRNA(+)	fungi	Fungi
BC-0302413675|k141_109756.2	AJ306718	33.06	Orthornavirae	Pisuviricota	Stelpaviricetes	Patatavirales	Potyviridae	Bymovirus	Oat mosaic virus	157837	ssRNA(+)	plants	Plants
BC-0302413675|k141_11095.6	BK013438	41.83	Orthornavirae	Lenarviricota	Leviviricetes	Timlovirales	Steitzviridae	Stehnavirus	Stehnavirus chorovicinum	2846386	ssRNA(+)	bacteria	Bacteria
BC-0302413675|k141_11644.2	MN532613	47.62	Orthornavirae	Lenarviricota	Miaviricetes	Ourlivirales	Botourmiaviridae	Magoulivirus	Magoulivirus jiplasmoparae	2956162	ssRNA(+)	other (specify)	Others
BC-0302413675|k141_17284.3	D55668	45.3	Orthornavirae	Pisuviricota	Duplopiviricetes	Durnavirales	Partitiviridae	Gammapartitivirus	Fusarium solani virus 1	1511847	dsRNA	fungi	Fungi
BC-0302413675|k141_2017.5	MK584847	29.81	Orthornavirae	Lenarviricota	Miaviricetes	Ourlivirales	Botourmiaviridae	Magoulivirus	Cladosporium magoulivirus 2	2843962	ssRNA(+)	fungi	Fungi
BC-0302413675|k141_21569.4	MN532665	60.68	Orthornavirae	Lenarviricota	Miaviricetes	Ourlivirales	Botourmiaviridae	Scleroulivirus	Scleroulivirus rhoplasmoparae	2956419	ssRNA(+)	other (specify)	Others
BC-0302413675|k141_25110.6	MK605686	76.16	Orthornavirae	Kitrinoviricota	Alsuviricetes	Tymovirales	Gammaflexiviridae	Xylavirus	Xylavirus EntGFV-2	2956703	ssRNA(+)	fungi	Fungi
BC-0302413675|k141_2723.3	MN473199	75	Orthornavirae	Lenarviricota	Miaviricetes	Ourlivirales	Botourmiaviridae	Penoulivirus	Phoma penoulivirus	2845834	ssRNA(+)	fungi	Fungi
BC-0302413675|k141_28016.4	MN473199	73.64	Orthornavirae	Lenarviricota	Miaviricetes	Ourlivirales	Botourmiaviridae	Penoulivirus	Phoma penoulivirus	2845834	ssRNA(+)	fungi	Fungi
BC-0302413675|k141_28718.6	MN532665	62.07	Orthornavirae	Lenarviricota	Miaviricetes	Ourlivirales	Botourmiaviridae	Scleroulivirus	Scleroulivirus rhoplasmoparae	2956419	ssRNA(+)	other (specify)	Others
BC-0302413675|k141_3097.5	MN532665	62.07	Orthornavirae	Lenarviricota	Miaviricetes	Ourlivirales	Botourmiaviridae	Scleroulivirus	Scleroulivirus rhoplasmoparae	2956419	ssRNA(+)	other (specify)	Others
BC-0302413675|k141_3103.2	MN532659	62.07	Orthornavirae	Lenarviricota	Miaviricetes	Ourlivirales	Botourmiaviridae	Scleroulivirus	Scleroulivirus lambdaplasmoparae	2956413	ssRNA(+)	other (specify)	Others
BC-0302413675|k141_32399.6	MN532627	67.45	Orthornavirae	Lenarviricota	Miaviricetes	Ourlivirales	Botourmiaviridae	Betascleroulivirus	Betascleroulivirus zetaplasmoparae	2955489	ssRNA(+)	other (specify)	Others
BC-0302413675|k141_34131.3	MN532613	47.66	Orthornavirae	Lenarviricota	Miaviricetes	Ourlivirales	Botourmiaviridae	Magoulivirus	Magoulivirus jiplasmoparae	2956162	ssRNA(+)	other (specify)	Others
BC-0302413675|k141_3519.6	MN532675	39.92	Orthornavirae	Lenarviricota	Miaviricetes	Ourlivirales	Botourmiaviridae	Penoulivirus	Penoulivirus zetaplasmoparae	2956297	ssRNA(+)	other (specify)	Others
BC-0302413675|k141_35388.3	MN532600	23.91	Orthornavirae	Lenarviricota	Miaviricetes	Ourlivirales	Botourmiaviridae	Magoulivirus	Magoulivirus iotaplasmoparae	2956160	ssRNA(+)	other (specify)	Others
BC-0302413675|k141_36142.2	MN605476	72.97	Orthornavirae	Lenarviricota	Miaviricetes	Ourlivirales	Botourmiaviridae	Betascleroulivirus	Betascleroulivirus botrytidis	2955479	ssRNA(+)	fungi	Fungi
BC-0302413675|k141_38538.1	MN532625	81.44	Orthornavirae	Lenarviricota	Miaviricetes	Ourlivirales	Botourmiaviridae	Betascleroulivirus	Betascleroulivirus deltaplasmoparae	2955480	ssRNA(+)	other (specify)	Others
BC-0302413675|k141_39699.4	MN532659	63.7	Orthornavirae	Lenarviricota	Miaviricetes	Ourlivirales	Botourmiaviridae	Scleroulivirus	Scleroulivirus lambdaplasmoparae	2956413	ssRNA(+)	other (specify)	Others
BC-0302413675|k141_40896.2	MN532627	69.72	Orthornavirae	Lenarviricota	Miaviricetes	Ourlivirales	Botourmiaviridae	Betascleroulivirus	Betascleroulivirus zetaplasmoparae	2955489	ssRNA(+)	other (specify)	Others
BC-0302413675|k141_40933.5	MN532627	70.14	Orthornavirae	Lenarviricota	Miaviricetes	Ourlivirales	Botourmiaviridae	Betascleroulivirus	Betascleroulivirus zetaplasmoparae	2955489	ssRNA(+)	other (specify)	Others
BC-0302413675|k141_4269.2	MT062429	66.36	Orthornavirae	Lenarviricota	Miaviricetes	Ourlivirales	Botourmiaviridae	Magoulivirus	Magoulivirus alphamacrophominae	2956150	ssRNA(+)	fungi	Fungi
BC-0302413675|k141_42793.1	MN532665	60.68	Orthornavirae	Lenarviricota	Miaviricetes	Ourlivirales	Botourmiaviridae	Scleroulivirus	Scleroulivirus rhoplasmoparae	2956419	ssRNA(+)	other (specify)	Others
BC-0302413675|k141_45220.1	MN532614	69.72	Orthornavirae	Lenarviricota	Miaviricetes	Ourlivirales	Botourmiaviridae	Magoulivirus	Magoulivirus psiplasmoparae	2956171	ssRNA(+)	other (specify)	Others
BC-0302413675|k141_45991.6	X01572	37.29	Orthornavirae	Kitrinoviricota	Alsuviricetes	Martellivirales	Bromoviridae	Alfamovirus	Alfalfa mosaic virus	12321	ssRNA(+)	plants	Plants
BC-0302413675|k141_46725.4	MN532669	60.14	Orthornavirae	Lenarviricota	Miaviricetes	Ourlivirales	Botourmiaviridae	Penoulivirus	Penoulivirus alphaplasmoparae	2956285	ssRNA(+)	other (specify)	Others
BC-0302413675|k141_48156.1	MG887760	51.18	Orthornavirae	Duplornaviricota	Chrymotiviricetes	Ghabrivirales	Chrysoviridae	Alphachrysovirus	Alphachrysovirus penicillii	2955246	dsRNA	fungi	Fungi
BC-0302413675|k141_49022.6	AM040148	77.91	Orthornavirae	Pisuviricota	Duplopiviricetes	Durnavirales	Partitiviridae	Gammapartitivirus	Penicillium stoloniferum virus S	216371	dsRNA	fungi	Fungi
BC-0302413675|k141_49668.6	MN532665	61.54	Orthornavirae	Lenarviricota	Miaviricetes	Ourlivirales	Botourmiaviridae	Scleroulivirus	Scleroulivirus rhoplasmoparae	2956419	ssRNA(+)	other (specify)	Others
BC-0302413675|k141_51579.1	D55668	35.04	Orthornavirae	Pisuviricota	Duplopiviricetes	Durnavirales	Partitiviridae	Gammapartitivirus	Fusarium solani virus 1	1511847	dsRNA	fungi	Fungi
BC-0302413675|k141_5178.3	AY089993	75	Orthornavirae	Pisuviricota	Duplopiviricetes	Durnavirales	Partitiviridae	Gammapartitivirus	Gremmeniella abietina RNA virus MS1	191436	dsRNA	fungi	Fungi
BC-0302413675|k141_52783.1	KT581451	33.33	Orthornavirae	Kitrinoviricota	Alsuviricetes	Tymovirales	Deltaflexiviridae	Deltaflexivirus	Sclerotinia deltaflexivirus 1	2169865	ssRNA(+)	fungi	Fungi
BC-0302413675|k141_54859.4	MN532613	47.66	Orthornavirae	Lenarviricota	Miaviricetes	Ourlivirales	Botourmiaviridae	Magoulivirus	Magoulivirus jiplasmoparae	2956162	ssRNA(+)	other (specify)	Others
BC-0302413675|k141_55704.4	MK279481	64.86	Orthornavirae	Lenarviricota	Miaviricetes	Ourlivirales	Botourmiaviridae	Penoulivirus	Aspergillus penoulivirus	2843742	ssRNA(+)	fungi	Fungi
BC-0302413675|k141_5700.3	KM817685	24.41	Orthornavirae	Negarnaviricota	Ellioviricetes	Bunyavirales	Nairoviridae	Orthonairovirus	Wenzhou orthonairovirus	2846658	ssRNA(-)	invertebrates	Invertebrates
BC-0302413675|k141_58972.1	MN605477	72.57	Orthornavirae	Lenarviricota	Miaviricetes	Ourlivirales	Botourmiaviridae	Botoulivirus	Botoulivirus betabotrytidis	2955518	ssRNA(+)	fungi	Fungi
BC-0302413675|k141_59303.5	MN043682	32.81	Orthornavirae	Lenarviricota	Howeltoviricetes	Cryppavirales	Mitoviridae	Triamitovirus	Triamitovirus gesu1	2956545	ssRNA(+)	fungi	Fungi
BC-0302413675|k141_60827.2	MN532627	68.81	Orthornavirae	Lenarviricota	Miaviricetes	Ourlivirales	Botourmiaviridae	Betascleroulivirus	Betascleroulivirus zetaplasmoparae	2955489	ssRNA(+)	other (specify)	Others
BC-0302413675|k141_61163.1	M33002	30.86	Orthornavirae	Kitrinoviricota	Tolucaviricetes	Tolivirales	Tombusviridae	Alphanecrovirus	Tobacco necrosis virus A	12055	ssRNA(+)	plants	Plants
BC-0302413675|k141_63742.2	MN532616	58.87	Orthornavirae	Lenarviricota	Miaviricetes	Ourlivirales	Botourmiaviridae	Magoulivirus	Magoulivirus omegaplasmoparae	2956168	ssRNA(+)	other (specify)	Others
BC-0302413675|k141_66128.5	MN532613	48.6	Orthornavirae	Lenarviricota	Miaviricetes	Ourlivirales	Botourmiaviridae	Magoulivirus	Magoulivirus jiplasmoparae	2956162	ssRNA(+)	other (specify)	Others
BC-0302413675|k141_66168.3	KT598226	37.04	Orthornavirae	Kitrinoviricota	Alsuviricetes	Tymovirales	Deltaflexiviridae	Deltaflexivirus	Soybean-associated deltaflexivirus 1	2169866	ssRNA(+)	plants	Plants
BC-0302413675|k141_67623.2	MN532602	78.9	Orthornavirae	Lenarviricota	Miaviricetes	Ourlivirales	Botourmiaviridae	Magoulivirus	Magoulivirus lambdaplasmoparae	2956164	ssRNA(+)	other (specify)	Others
BC-0302413675|k141_68153.4	MN532659	65.81	Orthornavirae	Lenarviricota	Miaviricetes	Ourlivirales	Botourmiaviridae	Scleroulivirus	Scleroulivirus lambdaplasmoparae	2956413	ssRNA(+)	other (specify)	Others
BC-0302413675|k141_69278.4	AF039063	27.94	Orthornavirae	Lenarviricota	Amabiliviricetes	Wolframvirales	Narnaviridae	Narnavirus	Saccharomyces 20S RNA narnavirus	186772	ssRNA(+)	fungi	Fungi
BC-0302413675|k141_72312.5	L07884	34.57	Orthornavirae	Kitrinoviricota	Tolucaviricetes	Tolivirales	Tombusviridae	Dianthovirus	Sweet clover necrotic mosaic virus	28348	ssRNA(+)	plants	Plants
BC-0302413675|k141_74979.3	D55668	66.86	Orthornavirae	Pisuviricota	Duplopiviricetes	Durnavirales	Partitiviridae	Gammapartitivirus	Fusarium solani virus 1	1511847	dsRNA	fungi	Fungi
BC-0302413675|k141_75642.2	MN532611	67.24	Orthornavirae	Lenarviricota	Miaviricetes	Ourlivirales	Botourmiaviridae	Magoulivirus	Magoulivirus ipsilonplasmoparae	2956161	ssRNA(+)	other (specify)	Others
BC-0302413675|k141_76412.1	MK682517	35.92	Orthornavirae	Lenarviricota	Howeltoviricetes	Cryppavirales	Mitoviridae	Unuamitovirus	Unuamitovirus enmu5	2956597	ssRNA(+)	fungi	Fungi
BC-0302413675|k141_76413.5	MN532614	38.16	Orthornavirae	Lenarviricota	Miaviricetes	Ourlivirales	Botourmiaviridae	Magoulivirus	Magoulivirus psiplasmoparae	2956171	ssRNA(+)	other (specify)	Others
BC-0302413675|k141_8195.5	MN532627	66.98	Orthornavirae	Lenarviricota	Miaviricetes	Ourlivirales	Botourmiaviridae	Betascleroulivirus	Betascleroulivirus zetaplasmoparae	2955489	ssRNA(+)	other (specify)	Others
BC-0302413675|k141_86425.3	MN532601	69.83	Orthornavirae	Lenarviricota	Miaviricetes	Ourlivirales	Botourmiaviridae	Magoulivirus	Magoulivirus kappaplasmoparae	2956163	ssRNA(+)	other (specify)	Others
BC-0302413675|k141_86977.1	AJ440010	37.29	Orthornavirae	Kitrinoviricota	Alsuviricetes	Martellivirales	Closteroviridae	Olivavirus	Olive leaf yellowing-associated virus	82791	ssRNA(+)	plants	Plants
BC-0302413675|k141_87241.1	MF142458	73.91	Orthornavirae	Negarnaviricota	Ellioviricetes	Bunyavirales	Discoviridae	Orthodiscovirus	Orthodiscovirus missouriense	2956245	ssRNA(-)	fungi	Fungi
BC-0302413675|k141_8727.2	MK584851	86.18	Orthornavirae	Negarnaviricota	Monjiviricetes	Mononegavirales	Mymonaviridae	Sclerotimonavirus	Sclerotimonavirus penicillii	2846160	ssRNA(-)	fungi	Fungi
BC-0302413675|k141_91275.5	MN585278	78.77	Orthornavirae	Negarnaviricota	Ellioviricetes	Bunyavirales	Discoviridae	Orthodiscovirus	Orthodiscovirus hispaniae	2956243	ssRNA(-)	other (specify)	Others
BC-0302413675|k141_91494.2	MN473199	73.64	Orthornavirae	Lenarviricota	Miaviricetes	Ourlivirales	Botourmiaviridae	Penoulivirus	Phoma penoulivirus	2845834	ssRNA(+)	fungi	Fungi
BC-0302413675|k141_91697.1	MN532613	47.66	Orthornavirae	Lenarviricota	Miaviricetes	Ourlivirales	Botourmiaviridae	Magoulivirus	Magoulivirus jiplasmoparae	2956162	ssRNA(+)	other (specify)	Others
BC-0302413675|k141_94971.1	AY100482	48.82	Orthornavirae	Kitrinoviricota	Tolucaviricetes	Tolivirales	Tombusviridae	Tombusvirus	Eggplant mottled crinkle virus	270256	ssRNA(+)	plants	Plants
BC-0302413675|k141_95562.4	KJ462512	64.44	Orthornavirae	Lenarviricota	Howeltoviricetes	Cryppavirales	Mitoviridae	Duamitovirus	Duamitovirus scsc6	2955837	ssRNA(+)	fungi	Fungi
BC-0302413675|k141_98592.6	MN532665	63.79	Orthornavirae	Lenarviricota	Miaviricetes	Ourlivirales	Botourmiaviridae	Scleroulivirus	Scleroulivirus rhoplasmoparae	2956419	ssRNA(+)	other (specify)	Others
BC-0302413675|k141_98647.2	MN532665	63.79	Orthornavirae	Lenarviricota	Miaviricetes	Ourlivirales	Botourmiaviridae	Scleroulivirus	Scleroulivirus rhoplasmoparae	2956419	ssRNA(+)	other (specify)	Others
BC-0302413675|k141_99241.6	AF297176	52.75	Orthornavirae	Duplornaviricota	Chrymotiviricetes	Ghabrivirales	Chrysoviridae	Alphachrysovirus	Alphachrysovirus helminthosporii	2955245	dsRNA	fungi	Fungi
BC-0302413687|k141_24578.4	AF014388	40.4	Orthornavirae	Pisuviricota	Pisoniviricetes	Picornavirales	Dicistroviridae	Cripavirus	Drosophila C virus	64279	ssRNA(+)	invertebrates	Invertebrates
BC-0302413687|k141_24949.4	BK010429	54.31	Orthornavirae	Lenarviricota	Howeltoviricetes	Cryppavirales	Mitoviridae	Duamitovirus	Duamitovirus dapi1	2955778	ssRNA(+)	plants	Plants
BC-0302413687|k141_41942.6	KC610514	49.17	Orthornavirae	Duplornaviricota	Chrymotiviricetes	Ghabrivirales	Totiviridae	Totivirus	Scheffersomyces segobiensis virus L	1300323	dsRNA	fungi	Fungi
BC-0302413687|k141_46420.2	U22521	28.36	Orthornavirae	Pisuviricota	Pisoniviricetes	Picornavirales	Picornaviridae	Enterovirus	Enterovirus A	138948	ssRNA(+)	vertebrates	Vertebrates	human
BC-0302413687|k141_46544.1	KT598226	77.78	Orthornavirae	Kitrinoviricota	Alsuviricetes	Tymovirales	Deltaflexiviridae	Deltaflexivirus	Soybean-associated deltaflexivirus 1	2169866	ssRNA(+)	plants	Plants
BC-0302413687|k141_7657.5	LC195294	72.22	Orthornavirae	Pisuviricota	Duplopiviricetes	Durnavirales	Partitiviridae	Deltapartitivirus	Pepper cryptic virus 2	1050903	dsRNA	plants	Plants
BC-0302413915|k141_17219.2	MG721540	61.95	Orthornavirae	Lenarviricota	Howeltoviricetes	Cryppavirales	Mitoviridae	Duamitovirus	Duamitovirus bevu1	2955768	ssRNA(+)	plants	Plants
BC-0302413915|k141_19245.5	KT598226	35.08	Orthornavirae	Kitrinoviricota	Alsuviricetes	Tymovirales	Deltaflexiviridae	Deltaflexivirus	Soybean-associated deltaflexivirus 1	2169866	ssRNA(+)	plants	Plants
BC-0302413915|k141_20776.1	KX024775	30.04	Orthornavirae	Pisuviricota	Pisoniviricetes	Picornavirales	Solinviviridae	Nyfulvavirus	Nylanderia fulva virus 1	1871153	ssRNA(+)	invertebrates	Invertebrates
BC-0302413915|k141_21178.4	AB573435	30.38	Orthornavirae	Kitrinoviricota	Alsuviricetes	Hepelivirales	Hepeviridae	Paslahepevirus	Paslahepevirus balayani	1678143	ssRNA(+)	vertebrates	Vertebrates	human
BC-0302413915|k141_21912.2	LC413501	42.13	Orthornavirae	Lenarviricota	Miaviricetes	Ourlivirales	Botourmiaviridae	Penoulivirus	Pyricularia penoulivirus	2846014	ssRNA(+)	fungi	Fungi
BC-0302413915|k141_2255.5	AB113347	56.99	Orthornavirae	Pisuviricota	Duplopiviricetes	Durnavirales	Partitiviridae	Betapartitivirus	Rosellinia necatrix virus 1	674984	dsRNA	fungi	Fungi
BC-0302413915|k141_24845.2	MN532595	57.76	Orthornavirae	Lenarviricota	Miaviricetes	Ourlivirales	Botourmiaviridae	Magoulivirus	Magoulivirus deltaplasmoparae	2956155	ssRNA(+)	other (specify)	Others
BC-0302413915|k141_24914.3	KX884062	45.51	Orthornavirae	Pisuviricota	Duplopiviricetes	Durnavirales	Picobirnaviridae	Orthopicobirnavirus	Orthopicobirnavirus beihaiense	NA	dsRNA	invertebrates	Invertebrates
BC-0302413915|k141_25469.2	U03387	87.01	Orthornavirae	Kitrinoviricota	Alsuviricetes	Martellivirales	Virgaviridae	Tobamovirus	Turnip vein-clearing virus	29272	ssRNA(+)	plants	Plants
BC-0302413915|k141_25634.2	BK010429	54.31	Orthornavirae	Lenarviricota	Howeltoviricetes	Cryppavirales	Mitoviridae	Duamitovirus	Duamitovirus dapi1	2955778	ssRNA(+)	plants	Plants
BC-0302413915|k141_29419.2	AJ012005	28.57	Orthornavirae	Kitrinoviricota	Alsuviricetes	Martellivirales	Virgaviridae	Furovirus	Chinese wheat mosaic virus	83544	ssRNA(+)	plants	Plants
BC-0302413915|k141_36251.6	AB573435	31.25	Orthornavirae	Kitrinoviricota	Alsuviricetes	Hepelivirales	Hepeviridae	Paslahepevirus	Paslahepevirus balayani	1678143	ssRNA(+)	vertebrates	Vertebrates	human
BC-0302413915|k141_36622.4	U03387	99.35	Orthornavirae	Kitrinoviricota	Alsuviricetes	Martellivirales	Virgaviridae	Tobamovirus	Turnip vein-clearing virus	29272	ssRNA(+)	plants	Plants
BC-0302413915|k141_37559.4	JQ864181	44.91	Orthornavirae	Kitrinoviricota	Tolucaviricetes	Tolivirales	Tombusviridae	Tombusvirus	Eggplant mottled crinkle virus	270256	ssRNA(+)	plants	Plants
BC-0302413915|k141_40885.2	J04357	35.33	Orthornavirae	Kitrinoviricota	Tolucaviricetes	Tolivirales	Tombusviridae	Dianthovirus	Red clover necrotic mosaic virus	12267	ssRNA(+)	plants	Plants
BC-0302413915|k141_50252.5	AB033998	82.22	Orthornavirae	Pisuviricota	Stelpaviricetes	Stellavirales	Astroviridae	Avastrovirus	Avastrovirus 2	1239438	ssRNA(+)	vertebrates	Vertebrates	human
BC-0302413915|k141_52411.6	X83964	46.47	Orthornavirae	Kitrinoviricota	Tolucaviricetes	Tolivirales	Tombusviridae	Avenavirus	Oat chlorotic stunt virus	146762	ssRNA	plants	Plants
BC-0302413915|k141_55874.5	HQ389540	30.73	Orthornavirae	Kitrinoviricota	Alsuviricetes	Martellivirales	Virgaviridae	Tobamovirus	Passion fruit mosaic virus	1032457	ssRNA(+)	plants	Plants
BC-0302413915|k141_57866.6	X83964	55.05	Orthornavirae	Kitrinoviricota	Tolucaviricetes	Tolivirales	Tombusviridae	Avenavirus	Oat chlorotic stunt virus	146762	ssRNA	plants	Plants
BC-0302413915|k141_57898.6	KT598226	79.25	Orthornavirae	Kitrinoviricota	Alsuviricetes	Tymovirales	Deltaflexiviridae	Deltaflexivirus	Soybean-associated deltaflexivirus 1	2169866	ssRNA(+)	plants	Plants
BC-0302413915|k141_58541.5	AB186123	64.96	Orthornavirae	Kitrinoviricota	Alsuviricetes	Tymovirales	Tymoviridae		Bombyx mori latent virus	2065033	ssRNA(+)	invertebrates	Invertebrates
BC-0302413915|k141_58867.3	KX024775	30.71	Orthornavirae	Pisuviricota	Pisoniviricetes	Picornavirales	Solinviviridae	Nyfulvavirus	Nylanderia fulva virus 1	1871153	ssRNA(+)	invertebrates	Invertebrates
BC-0302413915|k141_6177.6	FR687854	44.86	Orthornavirae	Pisuviricota	Duplopiviricetes	Durnavirales	Partitiviridae	Deltapartitivirus	Fig cryptic virus	882768	dsRNA	plants	Plants
BC-0302413915|k141_63019.1	MN386962	37.23	Orthornavirae	Lenarviricota	Miaviricetes	Ourlivirales	Botourmiaviridae	Penoulivirus	Penoulivirus malus	2956295	ssRNA(+)	plants	Plants
BC-0302413915|k141_6386.4	BK010429	53.04	Orthornavirae	Lenarviricota	Howeltoviricetes	Cryppavirales	Mitoviridae	Duamitovirus	Duamitovirus dapi1	2955778	ssRNA(+)	plants	Plants
BC-0302413915|k141_66302.5	V01408	100	Orthornavirae	Kitrinoviricota	Alsuviricetes	Martellivirales	Virgaviridae	Tobamovirus	Tobacco mosaic virus	12242	ssRNA(+)	plants	Plants
BC-0302413915|k141_71865.3	AJ295948	27.86	Orthornavirae	Kitrinoviricota	Alsuviricetes	Martellivirales	Virgaviridae	Tobamovirus	Kyuri green mottle mosaic virus	111970	ssRNA(+)	plants	Plants
BC-0302413915|k141_8157.4	AF277662	78.18	Orthornavirae	Kitrinoviricota	Alsuviricetes	Martellivirales	Bromoviridae	Ilarvirus	Prune dwarf virus	33760	ssRNA(+)	plants	Plants
BC-0302413915|k141_8424.2	X82547	93.62	Orthornavirae	Kitrinoviricota	Alsuviricetes	Tymovirales	Betaflexiviridae	Capillovirus	Cherry virus A	42882	ssRNA(+)	plants	Plants
BC-0302413915|k141_9530.2	MG721540	62.5	Orthornavirae	Lenarviricota	Howeltoviricetes	Cryppavirales	Mitoviridae	Duamitovirus	Duamitovirus bevu1	2955768	ssRNA(+)	plants	Plants
BC-0302413918|k141_101103.4	X83964	43.37	Orthornavirae	Kitrinoviricota	Tolucaviricetes	Tolivirales	Tombusviridae	Avenavirus	Oat chlorotic stunt virus	146762	ssRNA	plants	Plants
BC-0302413918|k141_106869.1	MN532614	70.48	Orthornavirae	Lenarviricota	Miaviricetes	Ourlivirales	Botourmiaviridae	Magoulivirus	Magoulivirus psiplasmoparae	2956171	ssRNA(+)	other (specify)	Others
BC-0302413918|k141_117557.5	MN532595	63.3	Orthornavirae	Lenarviricota	Miaviricetes	Ourlivirales	Botourmiaviridae	Magoulivirus	Magoulivirus deltaplasmoparae	2956155	ssRNA(+)	other (specify)	Others
BC-0302413918|k141_122748.3	LC413501	38.02	Orthornavirae	Lenarviricota	Miaviricetes	Ourlivirales	Botourmiaviridae	Penoulivirus	Pyricularia penoulivirus	2846014	ssRNA(+)	fungi	Fungi
BC-0302413918|k141_123738.1	KU187189	34.76	Orthornavirae	Kitrinoviricota	Tolucaviricetes	Tolivirales	Tombusviridae	Tombusvirus	Pelargonium leaf curl virus	35280	ssRNA(+)	plants	Plants
BC-0302413918|k141_124066.2	LC144945	71.3	Orthornavirae	Kitrinoviricota	Alsuviricetes	Martellivirales	Endornaviridae	Alphaendornavirus	Winged bean alphaendornavirus 1	2169693	ssRNA(+)	plants	Plants
BC-0302413918|k141_124401.3	BK010429	54.39	Orthornavirae	Lenarviricota	Howeltoviricetes	Cryppavirales	Mitoviridae	Duamitovirus	Duamitovirus dapi1	2955778	ssRNA(+)	plants	Plants
BC-0302413918|k141_127840.2	MN473199	80.77	Orthornavirae	Lenarviricota	Miaviricetes	Ourlivirales	Botourmiaviridae	Penoulivirus	Phoma penoulivirus	2845834	ssRNA(+)	fungi	Fungi
BC-0302413918|k141_130933.3	AB569997	55.44	Orthornavirae	Pisuviricota	Duplopiviricetes	Durnavirales	Partitiviridae	Alphapartitivirus	Rosellinia necatrix partitivirus 2	859651	dsRNA	fungi	Fungi
BC-0302413918|k141_15638.3	L07884	35.51	Orthornavirae	Kitrinoviricota	Tolucaviricetes	Tolivirales	Tombusviridae	Dianthovirus	Sweet clover necrotic mosaic virus	28348	ssRNA(+)	plants	Plants
BC-0302413918|k141_25016.6	HQ389540	31.22	Orthornavirae	Kitrinoviricota	Alsuviricetes	Martellivirales	Virgaviridae	Tobamovirus	Passion fruit mosaic virus	1032457	ssRNA(+)	plants	Plants
BC-0302413918|k141_28253.5	AJ514833	36.18	Orthornavirae	Kitrinoviricota	Tolucaviricetes	Tolivirales	Tombusviridae	Alphacarmovirus	Pelargonium flower break virus	35291	ssRNA(+)	plants	Plants
BC-0302413918|k141_28506.3	MG721540	61.95	Orthornavirae	Lenarviricota	Howeltoviricetes	Cryppavirales	Mitoviridae	Duamitovirus	Duamitovirus bevu1	2955768	ssRNA(+)	plants	Plants
BC-0302413918|k141_2851.3	JX197071	40	Orthornavirae	Kitrinoviricota	Tolucaviricetes	Tolivirales	Tombusviridae	Tombusvirus	Moroccan pepper virus	208086	ssRNA(+)	plants	Plants
BC-0302413918|k141_40243.5	BK013580	44	Orthornavirae	Lenarviricota	Leviviricetes	Norzivirales	Fiersviridae	Cehakivirus	Cehakivirus limihabitans	2843924	ssRNA(+)	bacteria	Bacteria
BC-0302413918|k141_41551.5	EU151723	46.5	Orthornavirae	Kitrinoviricota	Tolucaviricetes	Tolivirales	Tombusviridae	Umbravirus	Opium poppy mosaic virus	473784	ssRNA(+)	plants	Plants
BC-0302413918|k141_42181.3	BK010429	54.31	Orthornavirae	Lenarviricota	Howeltoviricetes	Cryppavirales	Mitoviridae	Duamitovirus	Duamitovirus dapi1	2955778	ssRNA(+)	plants	Plants
BC-0302413918|k141_56933.2	V01408	100	Orthornavirae	Kitrinoviricota	Alsuviricetes	Martellivirales	Virgaviridae	Tobamovirus	Tobacco mosaic virus	12242	ssRNA(+)	plants	Plants
BC-0302413918|k141_63560.4	MN532589	71.6	Orthornavirae	Lenarviricota	Miaviricetes	Ourlivirales	Botourmiaviridae	Betabotoulivirus	Betabotoulivirus betaplasmoparae	2955433	ssRNA(+)	other (specify)	Others
BC-0302413918|k141_74961.5	BK014204	63.33	Orthornavirae	Lenarviricota	Leviviricetes	Norzivirales	Fiersviridae	Yahnavirus	Yahnavirus asiovicinum	2846675	ssRNA(+)	bacteria	Bacteria
BC-0302413918|k141_75089.2	KJ415259	97.87	Orthornavirae	Kitrinoviricota	Alsuviricetes	Tymovirales	Betaflexiviridae	Carlavirus	Gaillardia latent virus	1468172	ssRNA(+)	plants	Plants
BC-0302413918|k141_88434.1	MK682516	39.73	Orthornavirae	Lenarviricota	Howeltoviricetes	Cryppavirales	Mitoviridae	Unuamitovirus	Unuamitovirus enmu4	2956596	ssRNA(+)	fungi	Fungi
BC-0302413918|k141_94865.6	MN532594	64.76	Orthornavirae	Lenarviricota	Miaviricetes	Ourlivirales	Botourmiaviridae	Magoulivirus	Magoulivirus gammaplasmoparae	2956159	ssRNA(+)	other (specify)	Others
BC-0302413923|k141_11868.6	U90136	36.51	Orthornavirae	Lenarviricota	Amabiliviricetes	Wolframvirales	Narnaviridae	Narnavirus	Saccharomyces 23S RNA narnavirus	198599	ssRNA(+)	fungi	Fungi
BC-0302413923|k141_17187.3	L07884	37.14	Orthornavirae	Kitrinoviricota	Tolucaviricetes	Tolivirales	Tombusviridae	Dianthovirus	Sweet clover necrotic mosaic virus	28348	ssRNA(+)	plants	Plants
BC-0302413923|k141_18018.1	MN532589	32.22	Orthornavirae	Lenarviricota	Miaviricetes	Ourlivirales	Botourmiaviridae	Betabotoulivirus	Betabotoulivirus betaplasmoparae	2955433	ssRNA(+)	other (specify)	Others
BC-0302413923|k141_29991.6	MN532613	99.14	Orthornavirae	Lenarviricota	Miaviricetes	Ourlivirales	Botourmiaviridae	Magoulivirus	Magoulivirus jiplasmoparae	2956162	ssRNA(+)	other (specify)	Others
BC-0302413923|k141_33783.4	AY616760	35.98	Orthornavirae	Kitrinoviricota	Tolucaviricetes	Tolivirales	Tombusviridae	Alphanecrovirus	Olive mild mosaic virus	295090	ssRNA(+)	plants	Plants
BC-0302413923|k141_3423.5	HQ343295	62.62	Orthornavirae	Duplornaviricota	Chrymotiviricetes	Ghabrivirales	Chrysoviridae	Betachrysovirus	Betachrysovirus fugramineari	2560478	dsRNA	fungi	Fungi
BC-0302413923|k141_38218.1	MN715322	69.14	Orthornavirae	Lenarviricota	Miaviricetes	Ourlivirales	Botourmiaviridae	Penoulivirus	Sclerotinia penoulivirus	2846164	ssRNA(+)	fungi	Fungi
BC-0302413923|k141_39402.6	MN557004	62.5	Orthornavirae	Negarnaviricota	Monjiviricetes	Mononegavirales	Mymonaviridae	Plasmopamonavirus	Plasmopamonavirus plasmoparae	2845860	ssRNA(-)	protist	Others
BC-0302413923|k141_39873.5	MN532631	62.93	Orthornavirae	Lenarviricota	Miaviricetes	Ourlivirales	Botourmiaviridae	Scleroulivirus	Scleroulivirus alphaplasmoparae	2956405	ssRNA(+)	other (specify)	Others
BC-0302413923|k141_40335.4	KT581451	34.69	Orthornavirae	Kitrinoviricota	Alsuviricetes	Tymovirales	Deltaflexiviridae	Deltaflexivirus	Sclerotinia deltaflexivirus 1	2169865	ssRNA(+)	fungi	Fungi
BC-0302413923|k141_41038.2	MN532645	74.79	Orthornavirae	Lenarviricota	Miaviricetes	Ourlivirales	Botourmiaviridae	Botoulivirus	Botoulivirus deltaplasmoparae	2955521	ssRNA(+)	other (specify)	Others
BC-0302413923|k141_42355.3	MN532616	51.56	Orthornavirae	Lenarviricota	Miaviricetes	Ourlivirales	Botourmiaviridae	Magoulivirus	Magoulivirus omegaplasmoparae	2956168	ssRNA(+)	other (specify)	Others
BC-0302413923|k141_43585.6	HM004067	71.59	Orthornavirae	Duplornaviricota	Chrymotiviricetes	Ghabrivirales	Chrysoviridae	Alphachrysovirus	Alphachrysovirus verticillii	2955249	dsRNA	fungi	Fungi
BC-0302413923|k141_44785.1	MN532622	35.61	Orthornavirae	Lenarviricota	Miaviricetes	Ourlivirales	Botourmiaviridae	Betascleroulivirus	Betascleroulivirus betaplasmoparae	2955478	ssRNA(+)	other (specify)	Others
BC-0302413923|k141_46825.4	MK279481	78.28	Orthornavirae	Lenarviricota	Miaviricetes	Ourlivirales	Botourmiaviridae	Penoulivirus	Aspergillus penoulivirus	2843742	ssRNA(+)	fungi	Fungi
BC-0302413923|k141_50748.1	AB844264	76.36	Orthornavirae	Kitrinoviricota	Alsuviricetes	Martellivirales	Endornaviridae	Alphaendornavirus	Basella alba alphaendornavirus 1	1384490	ssRNA(+)	plants	Plants
BC-0302413923|k141_51697.3	AB742454	71.79	Orthornavirae	Duplornaviricota	Chrymotiviricetes	Ghabrivirales	Totiviridae	Victorivirus	Rosellinia necatrix victorivirus 1	1148491	dsRNA	fungi	Fungi
BC-0302413923|k141_51700.1	MN532662	97.44	Orthornavirae	Lenarviricota	Miaviricetes	Ourlivirales	Botourmiaviridae	Scleroulivirus	Scleroulivirus xiplasmoparae	2956422	ssRNA(+)	other (specify)	Others
BC-0302413923|k141_51768.1	MN908947	100	Orthornavirae	Pisuviricota	Pisoniviricetes	Nidovirales	Coronaviridae	Betacoronavirus	Severe acute respiratory syndrome-related coronavirus	694009	ssRNA(+)	vertebrates	Vertebrates	human
BC-0302413923|k141_8520.6	MN532595	63.3	Orthornavirae	Lenarviricota	Miaviricetes	Ourlivirales	Botourmiaviridae	Magoulivirus	Magoulivirus deltaplasmoparae	2956155	ssRNA(+)	other (specify)	Others
BC-0302413927|k141_14358.6	MG721540	61.95	Orthornavirae	Lenarviricota	Howeltoviricetes	Cryppavirales	Mitoviridae	Duamitovirus	Duamitovirus bevu1	2955768	ssRNA(+)	plants	Plants
BC-0302413927|k141_4907.5	AY860978	26.12	Orthornavirae	Pisuviricota	Pisoniviricetes	Picornavirales	Secoviridae	Stralarivirus	Stralarivirus SLRSV	2956472	ssRNA(+)	plants	Plants
BC-0302413927|k141_8277.4	L18870	95.73	Orthornavirae	Kitrinoviricota	Tolucaviricetes	Tolivirales	Tombusviridae	Dianthovirus	Carnation ringspot virus	12268	ssRNA(+)	plants	Plants
BC-0302413933|k141_11889.1	MN532638	75.69	Orthornavirae	Lenarviricota	Miaviricetes	Ourlivirales	Botourmiaviridae	Betascleroulivirus	Betascleroulivirus lambdaplasmoparae	2955486	ssRNA(+)	other (specify)	Others
BC-0302413933|k141_13029.2	KC610514	51.67	Orthornavirae	Duplornaviricota	Chrymotiviricetes	Ghabrivirales	Totiviridae	Totivirus	Scheffersomyces segobiensis virus L	1300323	dsRNA	fungi	Fungi
BC-0302413933|k141_15874.1	KC610514	60.33	Orthornavirae	Duplornaviricota	Chrymotiviricetes	Ghabrivirales	Totiviridae	Totivirus	Scheffersomyces segobiensis virus L	1300323	dsRNA	fungi	Fungi
BC-0302413933|k141_21815.4	X83964	51.81	Orthornavirae	Kitrinoviricota	Tolucaviricetes	Tolivirales	Tombusviridae	Avenavirus	Oat chlorotic stunt virus	146762	ssRNA	plants	Plants
BC-0302413933|k141_25101.2	V01408	99.35	Orthornavirae	Kitrinoviricota	Alsuviricetes	Martellivirales	Virgaviridae	Tobamovirus	Tobacco mosaic virus	12242	ssRNA(+)	plants	Plants
BC-0302413933|k141_26432.1	V01408	100	Orthornavirae	Kitrinoviricota	Alsuviricetes	Martellivirales	Virgaviridae	Tobamovirus	Tobacco mosaic virus	12242	ssRNA(+)	plants	Plants
BC-0302413933|k141_29506.6	LC144945	28	Orthornavirae	Kitrinoviricota	Alsuviricetes	Martellivirales	Endornaviridae	Alphaendornavirus	Winged bean alphaendornavirus 1	2169693	ssRNA(+)	plants	Plants
BC-0302413933|k141_32628.6	KC610514	61.16	Orthornavirae	Duplornaviricota	Chrymotiviricetes	Ghabrivirales	Totiviridae	Totivirus	Scheffersomyces segobiensis virus L	1300323	dsRNA	fungi	Fungi
BC-0302413933|k141_34126.4	U20976	39.09	Orthornavirae	Kitrinoviricota	Tolucaviricetes	Tolivirales	Tombusviridae	Gammacarmovirus	Cowpea mottle virus	12627	ssRNA(+)	plants	Plants
BC-0302413933|k141_5797.2	U15440	31.85	Orthornavirae	Kitrinoviricota	Alsuviricetes	Martellivirales	Closteroviridae	Crinivirus	Lettuce infectious yellows virus	31713	ssRNA(+)	plants	Plants
BC-0302413933|k141_847.2	LC144945	71.3	Orthornavirae	Kitrinoviricota	Alsuviricetes	Martellivirales	Endornaviridae	Alphaendornavirus	Winged bean alphaendornavirus 1	2169693	ssRNA(+)	plants	Plants
BC-0302413943|k141_10280.3	LC144945	77.71	Orthornavirae	Kitrinoviricota	Alsuviricetes	Martellivirales	Endornaviridae	Alphaendornavirus	Winged bean alphaendornavirus 1	2169693	ssRNA(+)	plants	Plants
BC-0302413943|k141_18447.5	KX884032	38.92	Orthornavirae	Negarnaviricota	Yunchangviricetes	Goujianvirales	Yueviridae	Yuyuevirus	Yuyuevirus beihaiense	2508254	ssRNA(-)	invertebrates	Invertebrates
BC-0302413943|k141_19033.4	X01572	25.96	Orthornavirae	Kitrinoviricota	Alsuviricetes	Martellivirales	Bromoviridae	Alfamovirus	Alfalfa mosaic virus	12321	ssRNA(+)	plants	Plants
BC-0302413943|k141_20986.1	MG887749	78	Orthornavirae	Negarnaviricota	Ellioviricetes	Bunyavirales	Discoviridae	Orthodiscovirus	Orthodiscovirus penicillii	2956246	ssRNA(-)	fungi	Fungi
BC-0302413943|k141_21922.2	MN473199	92.98	Orthornavirae	Lenarviricota	Miaviricetes	Ourlivirales	Botourmiaviridae	Penoulivirus	Phoma penoulivirus	2845834	ssRNA(+)	fungi	Fungi
BC-0302413943|k141_33911.6	AB973945	45.4	Orthornavirae	Pisuviricota	Pisoniviricetes	Picornavirales	Marnaviridae	Kusarnavirus	Astarnavirus	2560308	ssRNA(+)	algae	Algae
BC-0302413943|k141_35436.4	KT946712	55.56	Orthornavirae	Kitrinoviricota	Tolucaviricetes	Tolivirales	Tombusviridae	Umbravirus	Ixeridium yellow mottle virus 2	1817526	ssRNA(+)	plants	Plants
BC-0302413943|k141_3918.2	BK013776	48.15	Orthornavirae	Lenarviricota	Leviviricetes	Timlovirales	Steitzviridae	Cebevirus	Cebevirus agrenecus	2843922	ssRNA(+)	bacteria	Bacteria
BC-0302413943|k141_39811.3	HM560703	80	Orthornavirae	Pisuviricota	Duplopiviricetes	Durnavirales	Partitiviridae	Deltapartitivirus	Beet cryptic virus 2	912029	dsRNA	plants	Plants
BC-0302413943|k141_42139.3	MN532674	89.47	Orthornavirae	Lenarviricota	Miaviricetes	Ourlivirales	Botourmiaviridae	Penoulivirus	Penoulivirus epsilonplasmoparae	2956289	ssRNA(+)	other (specify)	Others
BC-0302413943|k141_44077.5	KC577470	36	Orthornavirae	Pisuviricota	Pisoniviricetes	Sobelivirales	Solemoviridae	Sobemovirus	Solanum nodiflorum mottle virus	12471	ssRNA(+)	plants	Plants
BC-0302413948|k141_1439.6	MN532663	92.31	Orthornavirae	Lenarviricota	Miaviricetes	Ourlivirales	Botourmiaviridae	Scleroulivirus	Scleroulivirus omicronplasmoparae	2956417	ssRNA(+)	other (specify)	Others
BC-0302413948|k141_17712.2	JN117278	47.32	Orthornavirae	Pisuviricota	Duplopiviricetes	Durnavirales	Partitiviridae	Deltapartitivirus	Pepper cryptic virus 2	1050903	dsRNA	plants	Plants
BC-0302413948|k141_18415.1	AB710145	39.17	Orthornavirae	Pisuviricota	Stelpaviricetes	Patatavirales	Potyviridae	Macluravirus	Chinese yam necrotic mosaic virus	128818	ssRNA(+)	plants	Plants
BC-0302413948|k141_21291.4	MG721540	61.95	Orthornavirae	Lenarviricota	Howeltoviricetes	Cryppavirales	Mitoviridae	Duamitovirus	Duamitovirus bevu1	2955768	ssRNA(+)	plants	Plants
BC-0302413948|k141_32793.6	MG721540	57.02	Orthornavirae	Lenarviricota	Howeltoviricetes	Cryppavirales	Mitoviridae	Duamitovirus	Duamitovirus bevu1	2955768	ssRNA(+)	plants	Plants
BC-0302413948|k141_37888.5	AJ781397	66.14	Orthornavirae	Duplornaviricota	Chrymotiviricetes	Ghabrivirales	Chrysoviridae	Alphachrysovirus	Alphachrysovirus cerasi	284687	dsRNA	plants (S)	Plants
BC-0302413948|k141_46483.2	KC610514	61.16	Orthornavirae	Duplornaviricota	Chrymotiviricetes	Ghabrivirales	Totiviridae	Totivirus	Scheffersomyces segobiensis virus L	1300323	dsRNA	fungi	Fungi
BC-0302413956|k141_106485.1	DQ356949	30.77	Orthornavirae	Kitrinoviricota	Alsuviricetes	Martellivirales	Virgaviridae	Tobamovirus	Maracuja mosaic virus	368736	ssRNA(+)	plants	Plants
BC-0302413956|k141_24031.4	MN736966	70.91	Orthornavirae	Lenarviricota	Miaviricetes	Ourlivirales	Botourmiaviridae	Scleroulivirus	Scleroulivirus oidiodendronae	2956416	ssRNA(+)	fungi	Fungi
BC-0302413956|k141_24858.4	V01408	100	Orthornavirae	Kitrinoviricota	Alsuviricetes	Martellivirales	Virgaviridae	Tobamovirus	Tobacco mosaic virus	12242	ssRNA(+)	plants	Plants
BC-0302413956|k141_26755.2	MN532632	63.56	Orthornavirae	Lenarviricota	Miaviricetes	Ourlivirales	Botourmiaviridae	Epsilonscleroulivirus	Epsilonscleroulivirus plasmoparae	2955871	ssRNA(+)	other (specify)	Others
BC-0302413956|k141_31584.4	AB176964	26.09	Orthornavirae	Duplornaviricota	Chrymotiviricetes	Ghabrivirales	Totiviridae	Victorivirus	Magnaporthe oryzae virus 1	271257	dsRNA	fungi	Fungi
BC-0302413956|k141_39700.1	BK010429	53.91	Orthornavirae	Lenarviricota	Howeltoviricetes	Cryppavirales	Mitoviridae	Duamitovirus	Duamitovirus dapi1	2955778	ssRNA(+)	plants	Plants
BC-0302413956|k141_44122.3	BK010429	54.31	Orthornavirae	Lenarviricota	Howeltoviricetes	Cryppavirales	Mitoviridae	Duamitovirus	Duamitovirus dapi1	2955778	ssRNA(+)	plants	Plants
BC-0302413956|k141_52010.5	KT598226	77.36	Orthornavirae	Kitrinoviricota	Alsuviricetes	Tymovirales	Deltaflexiviridae	Deltaflexivirus	Soybean-associated deltaflexivirus 1	2169866	ssRNA(+)	plants	Plants
BC-0302413956|k141_57160.5	X83964	52.12	Orthornavirae	Kitrinoviricota	Tolucaviricetes	Tolivirales	Tombusviridae	Avenavirus	Oat chlorotic stunt virus	146762	ssRNA	plants	Plants
BC-0302413956|k141_66562.3	MN532665	64.91	Orthornavirae	Lenarviricota	Miaviricetes	Ourlivirales	Botourmiaviridae	Scleroulivirus	Scleroulivirus rhoplasmoparae	2956419	ssRNA(+)	other (specify)	Others
BC-0302413956|k141_69070.2	MN532674	90.91	Orthornavirae	Lenarviricota	Miaviricetes	Ourlivirales	Botourmiaviridae	Penoulivirus	Penoulivirus epsilonplasmoparae	2956289	ssRNA(+)	other (specify)	Others
BC-0302413956|k141_72490.2	MN605477	53.98	Orthornavirae	Lenarviricota	Miaviricetes	Ourlivirales	Botourmiaviridae	Botoulivirus	Botoulivirus betabotrytidis	2955518	ssRNA(+)	fungi	Fungi
BC-0302413956|k141_88583.4	MN605478	29.73	Orthornavirae	Lenarviricota	Miaviricetes	Ourlivirales	Botourmiaviridae	Botoulivirus	Botoulivirus gammabotrytidis	2955526	ssRNA(+)	fungi	Fungi
BC-0302413956|k141_89581.1	JN700748	48.5	Orthornavirae	Kitrinoviricota	Tolucaviricetes	Tolivirales	Tombusviridae	Tombusvirus	Moroccan pepper virus	208086	ssRNA(+)	plants	Plants
BC-0302413956|k141_91834.4	HQ389540	31.22	Orthornavirae	Kitrinoviricota	Alsuviricetes	Martellivirales	Virgaviridae	Tobamovirus	Passion fruit mosaic virus	1032457	ssRNA(+)	plants	Plants
BC-0302413956|k141_95346.2	X83964	52.73	Orthornavirae	Kitrinoviricota	Tolucaviricetes	Tolivirales	Tombusviridae	Avenavirus	Oat chlorotic stunt virus	146762	ssRNA	plants	Plants
BC-0302413956|k141_96895.6	MG721540	61.95	Orthornavirae	Lenarviricota	Howeltoviricetes	Cryppavirales	Mitoviridae	Duamitovirus	Duamitovirus bevu1	2955768	ssRNA(+)	plants	Plants
BC-0302413956|k141_99033.4	BK010429	53.04	Orthornavirae	Lenarviricota	Howeltoviricetes	Cryppavirales	Mitoviridae	Duamitovirus	Duamitovirus dapi1	2955778	ssRNA(+)	plants	Plants
BC-0302413988|k141_35109.1	X83964	53.33	Orthornavirae	Kitrinoviricota	Tolucaviricetes	Tolivirales	Tombusviridae	Avenavirus	Oat chlorotic stunt virus	146762	ssRNA	plants	Plants
BC-0302413988|k141_40443.1	EF375551	98.7	Orthornavirae	Kitrinoviricota	Alsuviricetes	Martellivirales	Virgaviridae	Tobamovirus	Rehmannia mosaic virus	425279	ssRNA(+)	plants	Plants
BC-0302413988|k141_40997.3	KJ641698	27.11	Orthornavirae	Pisuviricota	Pisoniviricetes	Picornavirales	Picornaviridae	Shanbavirus	Shanbavirus A	2170191	ssRNA(+)	vertebrates	Vertebrates	non_human_mammalia
BC-0302413988|k141_43545.2	AF174533	50.93	Orthornavirae	Kitrinoviricota	Magsaviricetes	Nodamuvirales	Nodaviridae	Alphanodavirus	Nodamura virus	12288	ssRNA(+)	invertebrates	Invertebrates	non_human_mammalia
BC-0302413988|k141_44872.4	V01408	100	Orthornavirae	Kitrinoviricota	Alsuviricetes	Martellivirales	Virgaviridae	Tobamovirus	Tobacco mosaic virus	12242	ssRNA(+)	plants	Plants
BC-0302413988|k141_47652.1	BK010429	53.91	Orthornavirae	Lenarviricota	Howeltoviricetes	Cryppavirales	Mitoviridae	Duamitovirus	Duamitovirus dapi1	2955778	ssRNA(+)	plants	Plants
BC-0302413988|k141_50436.1	M34077	100	Orthornavirae	Kitrinoviricota	Alsuviricetes	Martellivirales	Virgaviridae	Tobamovirus	Tobacco mild green mosaic virus	12241	ssRNA(+)	plants	Plants
BC-0302413988|k141_5172.5	M34077	100	Orthornavirae	Kitrinoviricota	Alsuviricetes	Martellivirales	Virgaviridae	Tobamovirus	Tobacco mild green mosaic virus	12241	ssRNA(+)	plants	Plants
BC-0302413988|k141_53549.4	AF246939	30.23	Orthornavirae	Pisuviricota	Duplopiviricetes	Durnavirales	Picobirnaviridae	Orthopicobirnavirus	Orthopicobirnavirus hominis	2956252	dsRNA	vertebrates	Vertebrates
BC-0302413988|k141_55813.2	BK013965	74.68	Orthornavirae	Lenarviricota	Leviviricetes	Timlovirales	Steitzviridae	Gredihovirus	Gredihovirus neochorenecus	2844738	ssRNA(+)	bacteria	Bacteria
BC-0302413988|k141_7554.3	AF277675	41.44	Orthornavirae	Pisuviricota	Pisoniviricetes	Picornavirales	Dicistroviridae	Aparavirus	Taura syndrome virus	142102	ssRNA(+)	invertebrates	Invertebrates
[truncated: 151,015 more rows]
