# Supplementary material for: Diversity and Distinctive Characteristics of the Global RNA Virome in Urban Environments
Source: Research Square preprint supplement (doi:10.21203/rs.3.rs-6735172/v1), 2025-06-26
Supplement: Supplementary file 6 [file 8e9c36706f6b16e61b0ce455.xlsx]

## Sheet: Supplementary Table 5
Taxonomic Annotation Purity of clusters under different identity threstholds
*purity: the proportion of dominant taxa within clusters
RCRset	identity	N	phylum level purity	sd	se	ci
RCR10	0.1	303	0.883643	0.235242	0.0135143	0.0265942
RCR20	0.2	303	0.883643	0.235242	0.0135143	0.0265942
RCR30	0.3	319	0.957163	0.128699	0.00720576	0.014177
RCR40	0.4	303	0.972886	0.0955109	0.00548696	0.0107975
RCR50	0.5	266	0.982731	0.0760096	0.00466045	0.00917622
RCR60	0.6	101	0.996317	0.0172632	0.00171775	0.00340797
RCR70	0.7	36	0.997244	0.00796698	0.00132783	0.00269564
RCR80	0.8	2	0.965116	0.049333	0.0348837	0.44324
