# Supplementary material for: Diversity and Distinctive Characteristics of the Global RNA Virome in Urban Environments
Source: Research Square preprint supplement (doi:10.21203/rs.3.rs-6735172/v1), 2025-06-26
Supplement: Supplementary file 7 [file 92834a7f536c59bcd86c7f8b.xlsx]

## Sheet: Supplementary Table 9
Host assignment by by matching the spacers in the UHGG database to the viral contigs
Spacer_id	RCR95	Virus_Phylum	Species_rep	Lineage	Alignment length	Mismatch	e-value
GUT_GENOME000187|.13470_2_62.1|1|17	SRR18771403|k141_110972_flag=1_multi=21.0000_len=1753	Pisuviricota	GUT_GENOME000187	d__Bacteria;p__Bacteroidota;c__Bacteroidia;o__Bacteroidales;f__Bacteroidaceae;g__Bacteroides_A;s__Bacteroides_A sp900066445	26	1	0.000703
GUT_GENOME000326|.15841_8_84.2|1|18	SRR11829103|k141_170280_flag=1_multi=12.0000_len=8794	Pisuviricota	GUT_GENOME096257	d__Bacteria;p__Firmicutes;c__Bacilli;o__Erysipelotrichales;f__Erysipelatoclostridiaceae;g__Erysipelatoclostridium;s__Erysipelatoclostridium ramosum	28	0	0.000175
GUT_GENOME000326|.15841_8_84.2|1|18	SRR11829332|k141_75842_flag=1_multi=315.0000_len=9821	Pisuviricota	GUT_GENOME096257	d__Bacteria;p__Firmicutes;c__Bacilli;o__Erysipelotrichales;f__Erysipelatoclostridiaceae;g__Erysipelatoclostridium;s__Erysipelatoclostridium ramosum	30	0	1.35e-05
GUT_GENOME000326|.15841_8_84.2|1|18	SRR17497063|k141_163584_flag=1_multi=2672.0000_len=4270	Pisuviricota	GUT_GENOME096257	d__Bacteria;p__Firmicutes;c__Bacilli;o__Erysipelotrichales;f__Erysipelatoclostridiaceae;g__Erysipelatoclostridium;s__Erysipelatoclostridium ramosum	29	0	4.86e-05
GUT_GENOME000326|.15841_8_84.2|1|18	SRR11564268|k141_181711_flag=1_multi=11.0000_len=1814	Kitrinoviricota	GUT_GENOME096257	d__Bacteria;p__Firmicutes;c__Bacilli;o__Erysipelotrichales;f__Erysipelatoclostridiaceae;g__Erysipelatoclostridium;s__Erysipelatoclostridium ramosum	28	0	1.05e-06
GUT_GENOME000326|.15841_8_84.2|1|18	SRR11827441|k141_82251_flag=1_multi=10.0000_len=8641	Pisuviricota	GUT_GENOME096257	d__Bacteria;p__Firmicutes;c__Bacilli;o__Erysipelotrichales;f__Erysipelatoclostridiaceae;g__Erysipelatoclostridium;s__Erysipelatoclostridium ramosum	26	0	1.35e-05
GUT_GENOME000326|.15841_8_84.2|1|18	SRR11829101|k141_277256_flag=1_multi=41.0000_len=9283	Pisuviricota	GUT_GENOME096257	d__Bacteria;p__Firmicutes;c__Bacilli;o__Erysipelotrichales;f__Erysipelatoclostridiaceae;g__Erysipelatoclostridium;s__Erysipelatoclostridium ramosum	32	1	2.91e-07
GUT_GENOME000326|.15841_8_84.2|1|18	SRR11829101|k141_277256_flag=1_multi=41.0000_len=9283	Pisuviricota	GUT_GENOME096257	d__Bacteria;p__Firmicutes;c__Bacilli;o__Erysipelotrichales;f__Erysipelatoclostridiaceae;g__Erysipelatoclostridium;s__Erysipelatoclostridium ramosum	32	1	2.91e-07
GUT_GENOME000326|.15841_8_84.2|1|18	SRR11829103|k141_170280_flag=1_multi=12.0000_len=8794	Pisuviricota	GUT_GENOME096257	d__Bacteria;p__Firmicutes;c__Bacilli;o__Erysipelotrichales;f__Erysipelatoclostridiaceae;g__Erysipelatoclostridium;s__Erysipelatoclostridium ramosum	28	0	0.000175
GUT_GENOME000326|.15841_8_84.2|1|18	SRR12685203|k141_82908_flag=1_multi=12.0000_len=5867	Pisuviricota	GUT_GENOME096257	d__Bacteria;p__Firmicutes;c__Bacilli;o__Erysipelotrichales;f__Erysipelatoclostridiaceae;g__Erysipelatoclostridium;s__Erysipelatoclostridium ramosum	25	0	4.86e-05
GUT_GENOME000326|.15841_8_84.2|1|18	SRR11829332|k141_165596_flag=1_multi=20.0000_len=7392	Pisuviricota	GUT_GENOME096257	d__Bacteria;p__Firmicutes;c__Bacilli;o__Erysipelotrichales;f__Erysipelatoclostridiaceae;g__Erysipelatoclostridium;s__Erysipelatoclostridium ramosum	27	0	0.000629
GUT_GENOME000326|.15841_8_84.2|1|18	SRR11829101|k141_277256_flag=1_multi=41.0000_len=9283	Pisuviricota	GUT_GENOME096257	d__Bacteria;p__Firmicutes;c__Bacilli;o__Erysipelotrichales;f__Erysipelatoclostridiaceae;g__Erysipelatoclostridium;s__Erysipelatoclostridium ramosum	32	1	2.91e-07
GUT_GENOME000326|.15841_8_84.2|1|18	SRR12685203|k141_82908_flag=1_multi=12.0000_len=5867	Pisuviricota	GUT_GENOME096257	d__Bacteria;p__Firmicutes;c__Bacilli;o__Erysipelotrichales;f__Erysipelatoclostridiaceae;g__Erysipelatoclostridium;s__Erysipelatoclostridium ramosum	25	0	4.86e-05
GUT_GENOME000326|.15841_8_84.2|1|18	SRR11829101|k141_277256_flag=1_multi=41.0000_len=9283	Pisuviricota	GUT_GENOME096257	d__Bacteria;p__Firmicutes;c__Bacilli;o__Erysipelotrichales;f__Erysipelatoclostridiaceae;g__Erysipelatoclostridium;s__Erysipelatoclostridium ramosum	32	1	2.91e-07
GUT_GENOME000326|.15841_8_84.2|1|18	SRR11827441|k141_82251_flag=1_multi=10.0000_len=8641	Pisuviricota	GUT_GENOME096257	d__Bacteria;p__Firmicutes;c__Bacilli;o__Erysipelotrichales;f__Erysipelatoclostridiaceae;g__Erysipelatoclostridium;s__Erysipelatoclostridium ramosum	26	0	1.35e-05
GUT_GENOME000326|.15841_8_84.2|1|18	SRR11564268|k141_181711_flag=1_multi=11.0000_len=1814	Kitrinoviricota	GUT_GENOME096257	d__Bacteria;p__Firmicutes;c__Bacilli;o__Erysipelotrichales;f__Erysipelatoclostridiaceae;g__Erysipelatoclostridium;s__Erysipelatoclostridium ramosum	28	0	1.05e-06
GUT_GENOME000326|.15841_8_84.2|1|18	SRR11829101|k141_277256_flag=1_multi=41.0000_len=9283	Pisuviricota	GUT_GENOME096257	d__Bacteria;p__Firmicutes;c__Bacilli;o__Erysipelotrichales;f__Erysipelatoclostridiaceae;g__Erysipelatoclostridium;s__Erysipelatoclostridium ramosum	32	1	2.91e-07
GUT_GENOME000326|.15841_8_84.2|1|18	SRR11829101|k141_277256_flag=1_multi=41.0000_len=9283	Pisuviricota	GUT_GENOME096257	d__Bacteria;p__Firmicutes;c__Bacilli;o__Erysipelotrichales;f__Erysipelatoclostridiaceae;g__Erysipelatoclostridium;s__Erysipelatoclostridium ramosum	32	1	2.91e-07
GUT_GENOME000344|.18048_1_41.16|1|34	SRR12685203|k141_82908_flag=1_multi=12.0000_len=5867	Pisuviricota	GUT_GENOME096257	d__Bacteria;p__Firmicutes;c__Bacilli;o__Erysipelotrichales;f__Erysipelatoclostridiaceae;g__Erysipelatoclostridium;s__Erysipelatoclostridium ramosum	25	0	4.86e-05
GUT_GENOME000344|.18048_1_41.16|1|34	SRR11829332|k141_75842_flag=1_multi=315.0000_len=9821	Pisuviricota	GUT_GENOME096257	d__Bacteria;p__Firmicutes;c__Bacilli;o__Erysipelotrichales;f__Erysipelatoclostridiaceae;g__Erysipelatoclostridium;s__Erysipelatoclostridium ramosum	30	0	1.35e-05
GUT_GENOME000344|.18048_1_41.16|1|34	SRR11827441|k141_82251_flag=1_multi=10.0000_len=8641	Pisuviricota	GUT_GENOME096257	d__Bacteria;p__Firmicutes;c__Bacilli;o__Erysipelotrichales;f__Erysipelatoclostridiaceae;g__Erysipelatoclostridium;s__Erysipelatoclostridium ramosum	26	0	1.35e-05
GUT_GENOME000344|.18048_1_41.16|1|34	SRR11827441|k141_82251_flag=1_multi=10.0000_len=8641	Pisuviricota	GUT_GENOME096257	d__Bacteria;p__Firmicutes;c__Bacilli;o__Erysipelotrichales;f__Erysipelatoclostridiaceae;g__Erysipelatoclostridium;s__Erysipelatoclostridium ramosum	26	0	1.35e-05
GUT_GENOME000344|.18048_1_41.16|1|34	SRR11829101|k141_277256_flag=1_multi=41.0000_len=9283	Pisuviricota	GUT_GENOME096257	d__Bacteria;p__Firmicutes;c__Bacilli;o__Erysipelotrichales;f__Erysipelatoclostridiaceae;g__Erysipelatoclostridium;s__Erysipelatoclostridium ramosum	32	1	2.91e-07
GUT_GENOME000344|.18048_1_41.16|1|34	SRR12685203|k141_82908_flag=1_multi=12.0000_len=5867	Pisuviricota	GUT_GENOME096257	d__Bacteria;p__Firmicutes;c__Bacilli;o__Erysipelotrichales;f__Erysipelatoclostridiaceae;g__Erysipelatoclostridium;s__Erysipelatoclostridium ramosum	25	0	4.86e-05
GUT_GENOME000344|.18048_1_41.16|1|34	SRR11829103|k141_170280_flag=1_multi=12.0000_len=8794	Pisuviricota	GUT_GENOME096257	d__Bacteria;p__Firmicutes;c__Bacilli;o__Erysipelotrichales;f__Erysipelatoclostridiaceae;g__Erysipelatoclostridium;s__Erysipelatoclostridium ramosum	28	0	0.000175
GUT_GENOME000344|.18048_1_41.16|1|34	SRR11564268|k141_181711_flag=1_multi=11.0000_len=1814	Kitrinoviricota	GUT_GENOME096257	d__Bacteria;p__Firmicutes;c__Bacilli;o__Erysipelotrichales;f__Erysipelatoclostridiaceae;g__Erysipelatoclostridium;s__Erysipelatoclostridium ramosum	28	0	1.05e-06
GUT_GENOME000344|.18048_1_41.16|1|34	SRR11564268|k141_181711_flag=1_multi=11.0000_len=1814	Kitrinoviricota	GUT_GENOME096257	d__Bacteria;p__Firmicutes;c__Bacilli;o__Erysipelotrichales;f__Erysipelatoclostridiaceae;g__Erysipelatoclostridium;s__Erysipelatoclostridium ramosum	28	0	1.05e-06
GUT_GENOME000344|.18048_1_41.16|1|34	SRR11829101|k141_277256_flag=1_multi=41.0000_len=9283	Pisuviricota	GUT_GENOME096257	d__Bacteria;p__Firmicutes;c__Bacilli;o__Erysipelotrichales;f__Erysipelatoclostridiaceae;g__Erysipelatoclostridium;s__Erysipelatoclostridium ramosum	32	1	2.91e-07
GUT_GENOME000344|.18048_1_41.16|1|34	SRR11829101|k141_277256_flag=1_multi=41.0000_len=9283	Pisuviricota	GUT_GENOME096257	d__Bacteria;p__Firmicutes;c__Bacilli;o__Erysipelotrichales;f__Erysipelatoclostridiaceae;g__Erysipelatoclostridium;s__Erysipelatoclostridium ramosum	32	1	2.91e-07
GUT_GENOME000344|.18048_1_41.16|1|34	SRR11829101|k141_277256_flag=1_multi=41.0000_len=9283	Pisuviricota	GUT_GENOME096257	d__Bacteria;p__Firmicutes;c__Bacilli;o__Erysipelotrichales;f__Erysipelatoclostridiaceae;g__Erysipelatoclostridium;s__Erysipelatoclostridium ramosum	32	1	2.91e-07
GUT_GENOME000344|.18048_1_41.16|1|34	SRR11829332|k141_165596_flag=1_multi=20.0000_len=7392	Pisuviricota	GUT_GENOME096257	d__Bacteria;p__Firmicutes;c__Bacilli;o__Erysipelotrichales;f__Erysipelatoclostridiaceae;g__Erysipelatoclostridium;s__Erysipelatoclostridium ramosum	27	0	0.000629
GUT_GENOME000344|.18048_1_41.16|1|34	SRR11829101|k141_277256_flag=1_multi=41.0000_len=9283	Pisuviricota	GUT_GENOME096257	d__Bacteria;p__Firmicutes;c__Bacilli;o__Erysipelotrichales;f__Erysipelatoclostridiaceae;g__Erysipelatoclostridium;s__Erysipelatoclostridium ramosum	32	1	2.91e-07
GUT_GENOME000344|.18048_1_41.16|1|34	SRR17497063|k141_163584_flag=1_multi=2672.0000_len=4270	Pisuviricota	GUT_GENOME096257	d__Bacteria;p__Firmicutes;c__Bacilli;o__Erysipelotrichales;f__Erysipelatoclostridiaceae;g__Erysipelatoclostridium;s__Erysipelatoclostridium ramosum	29	0	4.86e-05
GUT_GENOME000344|.18048_1_41.16|1|34	SRR11829103|k141_170280_flag=1_multi=12.0000_len=8794	Pisuviricota	GUT_GENOME096257	d__Bacteria;p__Firmicutes;c__Bacilli;o__Erysipelotrichales;f__Erysipelatoclostridiaceae;g__Erysipelatoclostridium;s__Erysipelatoclostridium ramosum	28	0	0.000175
GUT_GENOME000344|.18048_1_41.16|1|34	SRR11829101|k141_277256_flag=1_multi=41.0000_len=9283	Pisuviricota	GUT_GENOME096257	d__Bacteria;p__Firmicutes;c__Bacilli;o__Erysipelotrichales;f__Erysipelatoclostridiaceae;g__Erysipelatoclostridium;s__Erysipelatoclostridium ramosum	32	1	2.91e-07
GUT_GENOME000394|.18048_2_55.1|3|11	SRR11827439|k141_109350_flag=1_multi=4.0000_len=2497	Duplornaviricota	GUT_GENOME142330	d__Bacteria;p__Firmicutes_A;c__Clostridia;o__Peptostreptococcales;f__Peptostreptococcaceae;g__Clostridioides;s__Clostridioides difficile	26	1	0.000481
GUT_GENOME000450|.20287_6_25.20|3|7	SRR11829103|k141_3468_flag=1_multi=16.0000_len=8871	Pisuviricota	GUT_GENOME103893	d__Bacteria;p__Firmicutes_A;c__Clostridia;o__Lachnospirales;f__Lachnospiraceae;g__Coprococcus_A;s__Coprococcus_A catus	26	1	0.000444
GUT_GENOME000625|.20298_3_9.9|7|4	SRR11829142|k141_100701_flag=1_multi=6.9086_len=5064	Pisuviricota	GUT_GENOME000625	d__Bacteria;p__Firmicutes_A;c__Clostridia;o__Lachnospirales;f__Lachnospiraceae;g__Murimonas;s__Murimonas intestini	27	0	0.000407
GUT_GENOME000640|.21673_4_18.8|4|66	SRR11829103|k141_3468_flag=1_multi=16.0000_len=8871	Pisuviricota	GUT_GENOME103893	d__Bacteria;p__Firmicutes_A;c__Clostridia;o__Lachnospirales;f__Lachnospiraceae;g__Coprococcus_A;s__Coprococcus_A catus	26	1	0.000444
GUT_GENOME000859|AF15-31.Scaf4|1|3	SRR11450585|k141_159516_flag=1_multi=52.0000_len=5611	Kitrinoviricota	GUT_GENOME001027	d__Bacteria;p__Firmicutes_A;c__Clostridia;o__Lachnospirales;f__Lachnospiraceae;g__Coprococcus;s__Coprococcus sp900066115	27	1	0.000123
GUT_GENOME000859|AF15-31.Scaf4|1|3	SRR11678561|k141_177216_flag=1_multi=9.0000_len=3719	Lenarviricota	GUT_GENOME001027	d__Bacteria;p__Firmicutes_A;c__Clostridia;o__Lachnospirales;f__Lachnospiraceae;g__Coprococcus;s__Coprococcus sp900066115	30	1	0.000444
GUT_GENOME002315|NODE_885_length_16204_cov_12.3796|3|16	SRR11829101|k141_277256_flag=1_multi=41.0000_len=9283	Pisuviricota	GUT_GENOME096257	d__Bacteria;p__Firmicutes;c__Bacilli;o__Erysipelotrichales;f__Erysipelatoclostridiaceae;g__Erysipelatoclostridium;s__Erysipelatoclostridium ramosum	32	1	3.42e-07
GUT_GENOME002315|NODE_885_length_16204_cov_12.3796|3|16	SRR11648360|k141_140316_flag=1_multi=10.0000_len=5166	Pisuviricota	GUT_GENOME096257	d__Bacteria;p__Firmicutes;c__Bacilli;o__Erysipelotrichales;f__Erysipelatoclostridiaceae;g__Erysipelatoclostridium;s__Erysipelatoclostridium ramosum	36	3	4.42e-06
GUT_GENOME002315|NODE_885_length_16204_cov_12.3796|3|16	SRR11827441|k141_82251_flag=1_multi=10.0000_len=8641	Pisuviricota	GUT_GENOME096257	d__Bacteria;p__Firmicutes;c__Bacilli;o__Erysipelotrichales;f__Erysipelatoclostridiaceae;g__Erysipelatoclostridium;s__Erysipelatoclostridium ramosum	32	0	1.23e-06
GUT_GENOME002315|NODE_885_length_16204_cov_12.3796|3|16	SRR11827441|k141_82251_flag=1_multi=10.0000_len=8641	Pisuviricota	GUT_GENOME096257	d__Bacteria;p__Firmicutes;c__Bacilli;o__Erysipelotrichales;f__Erysipelatoclostridiaceae;g__Erysipelatoclostridium;s__Erysipelatoclostridium ramosum	32	0	1.23e-06
GUT_GENOME002315|NODE_885_length_16204_cov_12.3796|3|16	SRR11829332|k141_75842_flag=1_multi=315.0000_len=9821	Pisuviricota	GUT_GENOME096257	d__Bacteria;p__Firmicutes;c__Bacilli;o__Erysipelotrichales;f__Erysipelatoclostridiaceae;g__Erysipelatoclostridium;s__Erysipelatoclostridium ramosum	30	0	1.59e-05
GUT_GENOME002315|NODE_885_length_16204_cov_12.3796|3|16	SRR11564268|k141_181711_flag=1_multi=11.0000_len=1814	Kitrinoviricota	GUT_GENOME096257	d__Bacteria;p__Firmicutes;c__Bacilli;o__Erysipelotrichales;f__Erysipelatoclostridiaceae;g__Erysipelatoclostridium;s__Erysipelatoclostridium ramosum	28	0	1.23e-06
GUT_GENOME002315|NODE_885_length_16204_cov_12.3796|3|16	SRR11829103|k141_170280_flag=1_multi=12.0000_len=8794	Pisuviricota	GUT_GENOME096257	d__Bacteria;p__Firmicutes;c__Bacilli;o__Erysipelotrichales;f__Erysipelatoclostridiaceae;g__Erysipelatoclostridium;s__Erysipelatoclostridium ramosum	32	0	1.23e-06
GUT_GENOME002315|NODE_885_length_16204_cov_12.3796|3|16	SRR11829101|k141_277256_flag=1_multi=41.0000_len=9283	Pisuviricota	GUT_GENOME096257	d__Bacteria;p__Firmicutes;c__Bacilli;o__Erysipelotrichales;f__Erysipelatoclostridiaceae;g__Erysipelatoclostridium;s__Erysipelatoclostridium ramosum	32	1	3.42e-07
GUT_GENOME002315|NODE_885_length_16204_cov_12.3796|3|16	SRR17497063|k141_163584_flag=1_multi=2672.0000_len=4270	Pisuviricota	GUT_GENOME096257	d__Bacteria;p__Firmicutes;c__Bacilli;o__Erysipelotrichales;f__Erysipelatoclostridiaceae;g__Erysipelatoclostridium;s__Erysipelatoclostridium ramosum	32	2	1.59e-05
GUT_GENOME002315|NODE_885_length_16204_cov_12.3796|3|16	SRR11829101|k141_277256_flag=1_multi=41.0000_len=9283	Pisuviricota	GUT_GENOME096257	d__Bacteria;p__Firmicutes;c__Bacilli;o__Erysipelotrichales;f__Erysipelatoclostridiaceae;g__Erysipelatoclostridium;s__Erysipelatoclostridium ramosum	32	1	3.42e-07
GUT_GENOME002315|NODE_885_length_16204_cov_12.3796|3|16	SRR11829103|k141_170280_flag=1_multi=12.0000_len=8794	Pisuviricota	GUT_GENOME096257	d__Bacteria;p__Firmicutes;c__Bacilli;o__Erysipelotrichales;f__Erysipelatoclostridiaceae;g__Erysipelatoclostridium;s__Erysipelatoclostridium ramosum	32	0	1.23e-06
GUT_GENOME002315|NODE_885_length_16204_cov_12.3796|3|16	SRR11828460|k141_134285_flag=1_multi=5.0000_len=2422	Duplornaviricota	GUT_GENOME096257	d__Bacteria;p__Firmicutes;c__Bacilli;o__Erysipelotrichales;f__Erysipelatoclostridiaceae;g__Erysipelatoclostridium;s__Erysipelatoclostridium ramosum	33	1	1.59e-05
GUT_GENOME002315|NODE_885_length_16204_cov_12.3796|3|16	SRR11829101|k141_277256_flag=1_multi=41.0000_len=9283	Pisuviricota	GUT_GENOME096257	d__Bacteria;p__Firmicutes;c__Bacilli;o__Erysipelotrichales;f__Erysipelatoclostridiaceae;g__Erysipelatoclostridium;s__Erysipelatoclostridium ramosum	32	1	3.42e-07
GUT_GENOME002315|NODE_885_length_16204_cov_12.3796|3|16	SRR12685203|k141_82908_flag=1_multi=12.0000_len=5867	Pisuviricota	GUT_GENOME096257	d__Bacteria;p__Firmicutes;c__Bacilli;o__Erysipelotrichales;f__Erysipelatoclostridiaceae;g__Erysipelatoclostridium;s__Erysipelatoclostridium ramosum	29	0	5.72e-05
GUT_GENOME002315|NODE_885_length_16204_cov_12.3796|3|16	SRR11829103|k141_170280_flag=1_multi=12.0000_len=8794	Pisuviricota	GUT_GENOME096257	d__Bacteria;p__Firmicutes;c__Bacilli;o__Erysipelotrichales;f__Erysipelatoclostridiaceae;g__Erysipelatoclostridium;s__Erysipelatoclostridium ramosum	32	0	1.23e-06
GUT_GENOME002315|NODE_885_length_16204_cov_12.3796|3|16	SRR11829332|k141_165596_flag=1_multi=20.0000_len=7392	Pisuviricota	GUT_GENOME096257	d__Bacteria;p__Firmicutes;c__Bacilli;o__Erysipelotrichales;f__Erysipelatoclostridiaceae;g__Erysipelatoclostridium;s__Erysipelatoclostridium ramosum	27	0	0.00074
GUT_GENOME002315|NODE_885_length_16204_cov_12.3796|3|16	SRR12685203|k141_82908_flag=1_multi=12.0000_len=5867	Pisuviricota	GUT_GENOME096257	d__Bacteria;p__Firmicutes;c__Bacilli;o__Erysipelotrichales;f__Erysipelatoclostridiaceae;g__Erysipelatoclostridium;s__Erysipelatoclostridium ramosum	29	0	5.72e-05
GUT_GENOME002315|NODE_885_length_16204_cov_12.3796|3|16	SRR11829103|k141_170280_flag=1_multi=12.0000_len=8794	Pisuviricota	GUT_GENOME096257	d__Bacteria;p__Firmicutes;c__Bacilli;o__Erysipelotrichales;f__Erysipelatoclostridiaceae;g__Erysipelatoclostridium;s__Erysipelatoclostridium ramosum	32	0	1.23e-06
GUT_GENOME002315|NODE_885_length_16204_cov_12.3796|3|16	SRR11829101|k141_277256_flag=1_multi=41.0000_len=9283	Pisuviricota	GUT_GENOME096257	d__Bacteria;p__Firmicutes;c__Bacilli;o__Erysipelotrichales;f__Erysipelatoclostridiaceae;g__Erysipelatoclostridium;s__Erysipelatoclostridium ramosum	32	1	3.42e-07
GUT_GENOME002315|NODE_885_length_16204_cov_12.3796|3|16	SRR11829101|k141_277256_flag=1_multi=41.0000_len=9283	Pisuviricota	GUT_GENOME096257	d__Bacteria;p__Firmicutes;c__Bacilli;o__Erysipelotrichales;f__Erysipelatoclostridiaceae;g__Erysipelatoclostridium;s__Erysipelatoclostridium ramosum	32	1	3.42e-07
GUT_GENOME002315|NODE_885_length_16204_cov_12.3796|3|16	SRR11564268|k141_181711_flag=1_multi=11.0000_len=1814	Kitrinoviricota	GUT_GENOME096257	d__Bacteria;p__Firmicutes;c__Bacilli;o__Erysipelotrichales;f__Erysipelatoclostridiaceae;g__Erysipelatoclostridium;s__Erysipelatoclostridium ramosum	28	0	1.23e-06
GUT_GENOME002315|NODE_885_length_16204_cov_12.3796|3|16	SRR11827441|k141_82251_flag=1_multi=10.0000_len=8641	Pisuviricota	GUT_GENOME096257	d__Bacteria;p__Firmicutes;c__Bacilli;o__Erysipelotrichales;f__Erysipelatoclostridiaceae;g__Erysipelatoclostridium;s__Erysipelatoclostridium ramosum	32	0	1.23e-06
GUT_GENOME003351|NODE_2622_length_9582_cov_5.24394|2|2	SRR11829105|k141_45160_flag=1_multi=11.0000_len=4557	Unclassified	GUT_GENOME001297	d__Bacteria;p__Firmicutes_A;c__Clostridia;o__Lachnospirales;f__Lachnospiraceae;g__Acetatifactor;s__Acetatifactor sp900066565	24	0	0.000113
GUT_GENOME003547|NODE_10_length_192683_cov_17.3828|1|1	SRR5829904|k141_24749_flag=1_multi=8.0000_len=3809	Kitrinoviricota	GUT_GENOME000295	d__Bacteria;p__Firmicutes_A;c__Clostridia;o__Lachnospirales;f__Lachnospiraceae;g__Roseburia;s__Roseburia intestinalis	32	1	6e-05
GUT_GENOME003660|NODE_69_length_121624_cov_19.6078|1|37	SRR11649087|k141_72476_flag=1_multi=5.0000_len=1403	Negarnaviricota	GUT_GENOME000295	d__Bacteria;p__Firmicutes_A;c__Clostridia;o__Lachnospirales;f__Lachnospiraceae;g__Roseburia;s__Roseburia intestinalis	30	1	0.000296
GUT_GENOME004500|NODE_122_length_71420_cov_5.94999|1|12	SRR17481202|k141_1385_flag=1_multi=271.0000_len=10494	Duplornaviricota	GUT_GENOME096067	d__Bacteria;p__Firmicutes_A;c__Clostridia;o__Lachnospirales;f__Lachnospiraceae;g__Blautia_A;s__Blautia_A wexlerae	23	0	0.000481
GUT_GENOME005136|NODE_4757_length_4404_cov_4.17084|4|8	SRR11828459|k141_18049_flag=1_multi=4.0000_len=1029	Duplornaviricota	GUT_GENOME142330	d__Bacteria;p__Firmicutes_A;c__Clostridia;o__Peptostreptococcales;f__Peptostreptococcaceae;g__Clostridioides;s__Clostridioides difficile	29	1	1.11e-05
GUT_GENOME005335|NODE_1313_length_24802_cov_3.16358|1|15	SRR18771403|k141_143859_flag=1_multi=26.0000_len=4799	Pisuviricota	GUT_GENOME009178	d__Bacteria;p__Firmicutes_A;c__Clostridia;o__Lachnospirales;f__Lachnospiraceae;g__UBA11774;s__UBA11774 sp003507655	24	0	8.23e-05
GUT_GENOME005670|NODE_137_length_100497_cov_14.1947|1|2	SRR7536466|k141_479843_flag=1_multi=15.0000_len=2684	Lenarviricota	GUT_GENOME140240	d__Bacteria;p__Bacteroidota;c__Bacteroidia;o__Bacteroidales;f__Bacteroidaceae;g__Bacteroides;s__Bacteroides faecis	26	1	0.000296
GUT_GENOME006404|NODE_666_length_20093_cov_12.5112|4|4	BC-0345649851|k141_51703	Kitrinoviricota	GUT_GENOME143211	d__Bacteria;p__Verrucomicrobiota;c__Verrucomicrobiae;o__Verrucomicrobiales;f__Akkermansiaceae;g__Akkermansia;s__Akkermansia muciniphila	24	0	0.000113
GUT_GENOME006721|NODE_35_length_169579_cov_16.5113|1|12	SRR17481202|k141_1385_flag=1_multi=271.0000_len=10494	Duplornaviricota	GUT_GENOME096067	d__Bacteria;p__Firmicutes_A;c__Clostridia;o__Lachnospirales;f__Lachnospiraceae;g__Blautia_A;s__Blautia_A wexlerae	23	0	0.000481
GUT_GENOME007007|NODE_1094_length_13398_cov_3.40403|1|8	SRR11828459|k141_18049_flag=1_multi=4.0000_len=1029	Duplornaviricota	GUT_GENOME142330	d__Bacteria;p__Firmicutes_A;c__Clostridia;o__Peptostreptococcales;f__Peptostreptococcaceae;g__Clostridioides;s__Clostridioides difficile	29	1	1.11e-05
GUT_GENOME007282|NODE_72_length_134723_cov_6.11404|3|25	SRR11829099|k141_131879_flag=1_multi=29.0000_len=8814	Pisuviricota	GUT_GENOME140786	d__Bacteria;p__Firmicutes_A;c__Clostridia;o__Oscillospirales;f__Ruminococcaceae;g__Ruminococcus_D;s__Ruminococcus_D bicirculans	26	1	0.00037
GUT_GENOME007702|NODE_697_length_53870_cov_91.3394|1|30	SRR18174457|k141_32235_flag=0_multi=10.9680_len=7715	Pisuviricota	GUT_GENOME000166	d__Bacteria;p__Firmicutes_A;c__Clostridia;o__Lachnospirales;f__Lachnospiraceae;g__Acetatifactor;s__Acetatifactor sp900066365	26	1	0.000444
GUT_GENOME008405|NODE_7659_length_9859_cov_8.0000_ID_169242|2|2	SRR11648360|k141_194393_flag=1_multi=10.0000_len=6840	Pisuviricota	GUT_GENOME013721	d__Bacteria;p__Verrucomicrobiota;c__Verrucomicrobiae;o__Opitutales;f__CAG-312;g__CAG-312;s__CAG-312 sp000438015	25	1	0.001
GUT_GENOME008550|NODE_1101_length_40490_cov_17.7044|1|6	SRR17497126|k141_193482_flag=1_multi=5640.4495_len=2201	Pisuviricota	GUT_GENOME095991	d__Bacteria;p__Bacteroidota;c__Bacteroidia;o__Bacteroidales;f__Bacteroidaceae;g__Bacteroides;s__Bacteroides eggerthii	29	0	1.37e-07
GUT_GENOME008616|NODE_481_length_69756_cov_8.37348|1|9	SRR11829332|k141_52192_flag=1_multi=25.0000_len=4153	Lenarviricota	GUT_GENOME014725	d__Bacteria;p__Firmicutes_A;c__Clostridia;o__Christensenellales;f__CAG-138;g__PeH17;s__PeH17 sp000435055	26	1	0.00037
GUT_GENOME008616|NODE_481_length_69756_cov_8.37348|1|9	SRR8549881|k141_27611_flag=1_multi=8.0000_len=4123	Lenarviricota	GUT_GENOME014725	d__Bacteria;p__Firmicutes_A;c__Clostridia;o__Christensenellales;f__CAG-138;g__PeH17;s__PeH17 sp000435055	24	0	0.000103
GUT_GENOME008616|NODE_481_length_69756_cov_8.37348|1|9	BC-0302417410|k141_29202	Duplornaviricota	GUT_GENOME014725	d__Bacteria;p__Firmicutes_A;c__Clostridia;o__Christensenellales;f__CAG-138;g__PeH17;s__PeH17 sp000435055	26	1	0.00037
GUT_GENOME008616|NODE_481_length_69756_cov_8.37348|1|9	SRR5829934|k141_108735_flag=1_multi=10.0000_len=3624	Lenarviricota	GUT_GENOME014725	d__Bacteria;p__Firmicutes_A;c__Clostridia;o__Christensenellales;f__CAG-138;g__PeH17;s__PeH17 sp000435055	27	0	2.21e-06
GUT_GENOME008616|NODE_481_length_69756_cov_8.37348|1|9	SRR11647857|k141_71336_flag=1_multi=31.0000_len=6083	Kitrinoviricota	GUT_GENOME014725	d__Bacteria;p__Firmicutes_A;c__Clostridia;o__Christensenellales;f__CAG-138;g__PeH17;s__PeH17 sp000435055	25	0	2.86e-05
GUT_GENOME008616|NODE_481_length_69756_cov_8.37348|1|9	SRR11564270|k141_78987_flag=1_multi=13.0000_len=4445	Kitrinoviricota	GUT_GENOME014725	d__Bacteria;p__Firmicutes_A;c__Clostridia;o__Christensenellales;f__CAG-138;g__PeH17;s__PeH17 sp000435055	25	0	2.86e-05
GUT_GENOME009081|NODE_181_length_87777_cov_110.963|1|4	SRR11649087|k141_72476_flag=1_multi=5.0000_len=1403	Negarnaviricota	GUT_GENOME000295	d__Bacteria;p__Firmicutes_A;c__Clostridia;o__Lachnospirales;f__Lachnospiraceae;g__Roseburia;s__Roseburia intestinalis	30	1	0.000296
GUT_GENOME009591|NODE_4121_length_12403_cov_18.3017|6|5	SRR7535528|k141_90256_flag=1_multi=6.0000_len=2179	Kitrinoviricota	GUT_GENOME103864	d__Bacteria;p__Firmicutes;c__Bacilli;o__Erysipelotrichales;f__Erysipelotrichaceae;g__Holdemanella;s__Holdemanella biformis	30	1	0.000592
GUT_GENOME009664|NODE_4784_length_12403_cov_5.05507|5|5	SRR7535528|k141_90256_flag=1_multi=6.0000_len=2179	Kitrinoviricota	GUT_GENOME103864	d__Bacteria;p__Firmicutes;c__Bacilli;o__Erysipelotrichales;f__Erysipelotrichaceae;g__Holdemanella;s__Holdemanella biformis	30	1	0.000592
GUT_GENOME010359|NODE_2627_length_19822_cov_11.3688|1|17	SRR7539006|k141_651175_flag=1_multi=12.0000_len=5196	Pisuviricota	GUT_GENOME124777	d__Bacteria;p__Firmicutes_A;c__Clostridia;o__Oscillospirales;f__Oscillospiraceae;g__Oscillibacter;s__Oscillibacter sp001916835	24	0	0.000123
GUT_GENOME011061|NODE_1278_length_45445_cov_4.24219|1|5	SRR11829099|k141_100882_flag=1_multi=8.0000_len=3762	Kitrinoviricota	GUT_GENOME132205	d__Archaea;p__Euryarchaeota;c__Methanobacteria;o__Methanobacteriales;f__Methanobacteriaceae;g__Methanobrevibacter_A;s__Methanobrevibacter_A smithii	23	0	0.000444
GUT_GENOME012076|NODE_64_length_129298_cov_16.8492|1|1	SRR11647857|k141_86545_flag=1_multi=13.0000_len=3548	Lenarviricota	GUT_GENOME001027	d__Bacteria;p__Firmicutes_A;c__Clostridia;o__Lachnospirales;f__Lachnospiraceae;g__Coprococcus;s__Coprococcus sp900066115	30	1	0.000481
GUT_GENOME012568|NODE_211_length_94275_cov_35.2696|1|23	SRR17497063|k141_45368_flag=1_multi=9.0000_len=4110	Lenarviricota	GUT_GENOME232472	d__Bacteria;p__Firmicutes;c__Bacilli;o__RFN20;f__CAG-288;g__CAG-568;s__CAG-568 sp000434395	23	0	0.000296
GUT_GENOME012568|NODE_211_length_94275_cov_35.2696|1|23	SRR17497098|k141_12294_flag=1_multi=34.0000_len=3842	Lenarviricota	GUT_GENOME232472	d__Bacteria;p__Firmicutes;c__Bacilli;o__RFN20;f__CAG-288;g__CAG-568;s__CAG-568 sp000434395	23	0	0.000296
GUT_GENOME012596|NODE_1641_length_18355_cov_8.71503|1|17	SRR11828959|k141_93124_flag=1_multi=11.0000_len=9475	Pisuviricota	GUT_GENOME232404	d__Bacteria;p__Firmicutes_A;c__Clostridia;o__Oscillospirales;f__Oscillospiraceae;g__CAG-110;s__	26	1	0.00037
GUT_GENOME012913|NODE_3_length_469262_cov_66.8489|2|14	SRR5829934|k141_108735_flag=1_multi=10.0000_len=3624	Lenarviricota	GUT_GENOME018576	d__Bacteria;p__Bacteroidota;c__Bacteroidia;o__Bacteroidales;f__UBA932;g__RC9;s__RC9 sp000433355	26	1	0.000444
GUT_GENOME012913|NODE_3_length_469262_cov_66.8489|2|14	SRR12685681|k141_89424_flag=1_multi=7.0000_len=5801	Kitrinoviricota	GUT_GENOME018576	d__Bacteria;p__Bacteroidota;c__Bacteroidia;o__Bacteroidales;f__UBA932;g__RC9;s__RC9 sp000433355	26	1	0.000444
GUT_GENOME013046|NODE_68_length_133634_cov_45.821|1|9	SRR5829938|k141_42310_flag=1_multi=31.0000_len=7586	Kitrinoviricota	GUT_GENOME013046	d__Bacteria;p__Firmicutes;c__Bacilli;o__Acholeplasmatales;f__CAG-307;g__UBA7004;s__	26	1	0.000444
GUT_GENOME013046|NODE_68_length_133634_cov_45.821|1|9	SRR18770930|k141_101437_flag=1_multi=27.0000_len=4848	Pisuviricota	GUT_GENOME013046	d__Bacteria;p__Firmicutes;c__Bacilli;o__Acholeplasmatales;f__CAG-307;g__UBA7004;s__	30	1	0.000444
GUT_GENOME013077|NODE_14_length_203414_cov_10.5823|1|16	SRR5829904|k141_150231_flag=1_multi=26.0000_len=8234	Pisuviricota	GUT_GENOME019375	d__Bacteria;p__Firmicutes_A;c__Clostridia;o__Oscillospirales;f__Acutalibacteraceae;g__Eubacterium_R;s__Eubacterium_R sp000436835	26	1	0.000296
GUT_GENOME013139|NODE_20_length_199314_cov_23.8142|1|2	SRR5829934|k141_108735_flag=1_multi=10.0000_len=3624	Lenarviricota	GUT_GENOME018576	d__Bacteria;p__Bacteroidota;c__Bacteroidia;o__Bacteroidales;f__UBA932;g__RC9;s__RC9 sp000433355	26	1	0.000444
GUT_GENOME013139|NODE_20_length_199314_cov_23.8142|1|2	SRR12685681|k141_89424_flag=1_multi=7.0000_len=5801	Kitrinoviricota	GUT_GENOME018576	d__Bacteria;p__Bacteroidota;c__Bacteroidia;o__Bacteroidales;f__UBA932;g__RC9;s__RC9 sp000433355	26	1	0.000444
GUT_GENOME013313|NODE_1621_length_16855_cov_7.4519|1|4	SRR11622354|k141_395384_flag=1_multi=39.0000_len=9976	Pisuviricota	GUT_GENOME106500	d__Bacteria;p__Firmicutes_A;c__Clostridia;o__Oscillospirales;f__Ruminococcaceae;g__Ruminococcus;s__	30	1	0.000444
GUT_GENOME014092|NODE_1265_length_19959_cov_6.59335|1|32	SRR18774405|k141_280274_flag=1_multi=14.0000_len=1610	Pisuviricota	GUT_GENOME013560	d__Bacteria;p__Spirochaetota;c__Brachyspirae;o__Brachyspirales;f__Brachyspiraceae;g__Brachyspira;s__Brachyspira sp000431595	26	1	0.000481
GUT_GENOME014128|NODE_568_length_41349_cov_5.94815|2|9	SRR5829904|k141_150231_flag=1_multi=26.0000_len=8234	Pisuviricota	GUT_GENOME019375	d__Bacteria;p__Firmicutes_A;c__Clostridia;o__Oscillospirales;f__Acutalibacteraceae;g__Eubacterium_R;s__Eubacterium_R sp000436835	26	1	0.000296
GUT_GENOME014513|NODE_89_length_74400_cov_13.7355|1|29	SRR7541460|k141_267431_flag=1_multi=16.0000_len=7737	Pisuviricota	GUT_GENOME007598	d__Bacteria;p__Firmicutes_A;c__Clostridia;o__Lachnospirales;f__Lachnospiraceae;g__Lachnobacterium;s__	26	1	0.000407
GUT_GENOME014916|NODE_1104_length_24786_cov_10.9133|1|22	SRR11829001|k141_60898_flag=1_multi=5.0000_len=2520	Lenarviricota	GUT_GENOME013560	d__Bacteria;p__Spirochaetota;c__Brachyspirae;o__Brachyspirales;f__Brachyspiraceae;g__Brachyspira;s__Brachyspira sp000431595	23	0	0.000481
GUT_GENOME014916|NODE_1104_length_24786_cov_10.9133|2|10	SRR11829001|k141_60898_flag=1_multi=5.0000_len=2520	Lenarviricota	GUT_GENOME013560	d__Bacteria;p__Spirochaetota;c__Brachyspirae;o__Brachyspirales;f__Brachyspiraceae;g__Brachyspira;s__Brachyspira sp000431595	23	0	0.000481
GUT_GENOME014916|NODE_1220_length_22740_cov_10.7125|3|38	SRR8959258|k141_13796_flag=1_multi=9.0000_len=7232	Negarnaviricota	GUT_GENOME013560	d__Bacteria;p__Spirochaetota;c__Brachyspirae;o__Brachyspirales;f__Brachyspiraceae;g__Brachyspira;s__Brachyspira sp000431595	27	1	0.000134
GUT_GENOME015069|NODE_1059_length_24786_cov_12.1583|1|22	SRR11829001|k141_60898_flag=1_multi=5.0000_len=2520	Lenarviricota	GUT_GENOME013560	d__Bacteria;p__Spirochaetota;c__Brachyspirae;o__Brachyspirales;f__Brachyspiraceae;g__Brachyspira;s__Brachyspira sp000431595	23	0	0.000481
GUT_GENOME015069|NODE_1059_length_24786_cov_12.1583|2|6	SRR11829001|k141_60898_flag=1_multi=5.0000_len=2520	Lenarviricota	GUT_GENOME013560	d__Bacteria;p__Spirochaetota;c__Brachyspirae;o__Brachyspirales;f__Brachyspiraceae;g__Brachyspira;s__Brachyspira sp000431595	23	0	0.000481
GUT_GENOME015069|NODE_1175_length_22740_cov_11.4672|3|38	SRR8959258|k141_13796_flag=1_multi=9.0000_len=7232	Negarnaviricota	GUT_GENOME013560	d__Bacteria;p__Spirochaetota;c__Brachyspirae;o__Brachyspirales;f__Brachyspiraceae;g__Brachyspira;s__Brachyspira sp000431595	27	1	0.000134
GUT_GENOME016201|NODE_74_length_98743_cov_16.1622|2|6	SRR11564271|k141_243949_flag=1_multi=15.0000_len=3432	Pisuviricota	GUT_GENOME000308	d__Bacteria;p__Firmicutes_A;c__Clostridia;o__Lachnospirales;f__Lachnospiraceae;g__Lachnospira;s__Lachnospira rogosae	23	0	0.000629
GUT_GENOME016712|NODE_15_length_155243_cov_14.838|2|6	SRR11564271|k141_243949_flag=1_multi=15.0000_len=3432	Pisuviricota	GUT_GENOME000308	d__Bacteria;p__Firmicutes_A;c__Clostridia;o__Lachnospirales;f__Lachnospiraceae;g__Lachnospira;s__Lachnospira rogosae	23	0	0.000629
GUT_GENOME016937|NODE_1035_length_14529_cov_8.15276|1|5	SRR17509967|k141_73388_flag=1_multi=59.0000_len=1831	Pisuviricota	GUT_GENOME140268	d__Bacteria;p__Firmicutes_A;c__Clostridia;o__Oscillospirales;f__Butyricicoccaceae;g__Agathobaculum;s__	39	1	1.58e-08
GUT_GENOME016937|NODE_1035_length_14529_cov_8.15276|1|5	SRR18774406|k141_194551_flag=1_multi=13.0000_len=1400	Pisuviricota	GUT_GENOME140268	d__Bacteria;p__Firmicutes_A;c__Clostridia;o__Oscillospirales;f__Butyricicoccaceae;g__Agathobaculum;s__	31	0	5.68e-08
GUT_GENOME016937|NODE_1035_length_14529_cov_8.15276|1|5	SRR8549461|k141_44809_flag=1_multi=4.0000_len=1481	Lenarviricota	GUT_GENOME140268	d__Bacteria;p__Firmicutes_A;c__Clostridia;o__Oscillospirales;f__Butyricicoccaceae;g__Agathobaculum;s__	36	1	4.39e-09
GUT_GENOME016937|NODE_1035_length_14529_cov_8.15276|1|5	SRR17497098|k141_43772_flag=1_multi=246.0000_len=4114	Pisuviricota	GUT_GENOME140268	d__Bacteria;p__Firmicutes_A;c__Clostridia;o__Oscillospirales;f__Butyricicoccaceae;g__Agathobaculum;s__	38	1	5.68e-08
GUT_GENOME016937|NODE_1035_length_14529_cov_8.15276|1|5	SRR18771420|k141_30343_flag=1_multi=5.0000_len=1439	Lenarviricota	GUT_GENOME140268	d__Bacteria;p__Firmicutes_A;c__Clostridia;o__Oscillospirales;f__Butyricicoccaceae;g__Agathobaculum;s__	31	0	5.68e-08
GUT_GENOME016937|NODE_1035_length_14529_cov_8.15276|1|5	SRR11450577|k141_48477_flag=1_multi=94.0000_len=2958	Kitrinoviricota	GUT_GENOME140268	d__Bacteria;p__Firmicutes_A;c__Clostridia;o__Oscillospirales;f__Butyricicoccaceae;g__Agathobaculum;s__	32	0	1.58e-08
GUT_GENOME016937|NODE_1035_length_14529_cov_8.15276|1|5	SRR10849655|k141_268313_flag=1_multi=8.0000_len=2645	Lenarviricota	GUT_GENOME140268	d__Bacteria;p__Firmicutes_A;c__Clostridia;o__Oscillospirales;f__Butyricicoccaceae;g__Agathobaculum;s__	31	0	5.68e-08
GUT_GENOME016937|NODE_1035_length_14529_cov_8.15276|1|5	SRR8549913|k141_29335_flag=1_multi=409.0000_len=4142	Kitrinoviricota	GUT_GENOME140268	d__Bacteria;p__Firmicutes_A;c__Clostridia;o__Oscillospirales;f__Butyricicoccaceae;g__Agathobaculum;s__	32	0	1.58e-08
GUT_GENOME016937|NODE_1035_length_14529_cov_8.15276|1|5	SRR11450577|k141_4648_flag=1_multi=7.0000_len=1089	Pisuviricota	GUT_GENOME140268	d__Bacteria;p__Firmicutes_A;c__Clostridia;o__Oscillospirales;f__Butyricicoccaceae;g__Agathobaculum;s__	32	0	1.58e-08
GUT_GENOME016937|NODE_1035_length_14529_cov_8.15276|1|5	SRR11450586|k141_229357_flag=1_multi=6.0000_len=1920	Lenarviricota	GUT_GENOME140268	d__Bacteria;p__Firmicutes_A;c__Clostridia;o__Oscillospirales;f__Butyricicoccaceae;g__Agathobaculum;s__	32	0	1.58e-08
GUT_GENOME016937|NODE_1035_length_14529_cov_8.15276|1|5	SRR11622354|k141_213343_flag=1_multi=14.0000_len=3522	Lenarviricota	GUT_GENOME140268	d__Bacteria;p__Firmicutes_A;c__Clostridia;o__Oscillospirales;f__Butyricicoccaceae;g__Agathobaculum;s__	36	0	1.58e-08
GUT_GENOME016937|NODE_1035_length_14529_cov_8.15276|1|5	SRR18770931|k141_38845_flag=1_multi=221.0000_len=4319	Kitrinoviricota	GUT_GENOME140268	d__Bacteria;p__Firmicutes_A;c__Clostridia;o__Oscillospirales;f__Butyricicoccaceae;g__Agathobaculum;s__	40	1	4.39e-09
GUT_GENOME016937|NODE_1035_length_14529_cov_8.15276|1|5	SRR11075871|k141_471240_flag=1_multi=25.0000_len=3773	Lenarviricota	GUT_GENOME140268	d__Bacteria;p__Firmicutes_A;c__Clostridia;o__Oscillospirales;f__Butyricicoccaceae;g__Agathobaculum;s__	35	1	1.58e-08
GUT_GENOME016937|NODE_1035_length_14529_cov_8.15276|1|5	SRR17497098|k141_43772_flag=1_multi=246.0000_len=4114	Pisuviricota	GUT_GENOME140268	d__Bacteria;p__Firmicutes_A;c__Clostridia;o__Oscillospirales;f__Butyricicoccaceae;g__Agathobaculum;s__	38	1	5.68e-08
GUT_GENOME016937|NODE_1035_length_14529_cov_8.15276|1|5	SRR11648360|k141_64631_flag=1_multi=13.0000_len=3482	Lenarviricota	GUT_GENOME140268	d__Bacteria;p__Firmicutes_A;c__Clostridia;o__Oscillospirales;f__Butyricicoccaceae;g__Agathobaculum;s__	36	0	1.58e-08
GUT_GENOME016937|NODE_1035_length_14529_cov_8.15276|1|5	SRR11829261|k141_142914_flag=1_multi=38.0000_len=6087	Duplornaviricota	GUT_GENOME140268	d__Bacteria;p__Firmicutes_A;c__Clostridia;o__Oscillospirales;f__Butyricicoccaceae;g__Agathobaculum;s__	32	0	1.58e-08
GUT_GENOME016937|NODE_1035_length_14529_cov_8.15276|1|5	SRR11565847|k141_111433_flag=1_multi=250.0000_len=3475	Lenarviricota	GUT_GENOME140268	d__Bacteria;p__Firmicutes_A;c__Clostridia;o__Oscillospirales;f__Butyricicoccaceae;g__Agathobaculum;s__	31	0	5.68e-08
GUT_GENOME016937|NODE_1035_length_14529_cov_8.15276|1|5	SRR11829101|k141_232442_flag=1_multi=66.0000_len=3929	Lenarviricota	GUT_GENOME140268	d__Bacteria;p__Firmicutes_A;c__Clostridia;o__Oscillospirales;f__Butyricicoccaceae;g__Agathobaculum;s__	32	0	1.58e-08
GUT_GENOME016937|NODE_1035_length_14529_cov_8.15276|1|5	SRR10849655|k141_168949_flag=1_multi=297.0000_len=5099	Lenarviricota	GUT_GENOME140268	d__Bacteria;p__Firmicutes_A;c__Clostridia;o__Oscillospirales;f__Butyricicoccaceae;g__Agathobaculum;s__	31	0	5.68e-08
GUT_GENOME016937|NODE_1035_length_14529_cov_8.15276|1|5	SRR18774405|k141_255994_flag=1_multi=540.7383_len=3282	Lenarviricota	GUT_GENOME140268	d__Bacteria;p__Firmicutes_A;c__Clostridia;o__Oscillospirales;f__Butyricicoccaceae;g__Agathobaculum;s__	32	0	1.58e-08
GUT_GENOME016937|NODE_1035_length_14529_cov_8.15276|1|5	SRR5829933|k141_80774_flag=1_multi=77.0000_len=1871	Kitrinoviricota	GUT_GENOME140268	d__Bacteria;p__Firmicutes_A;c__Clostridia;o__Oscillospirales;f__Butyricicoccaceae;g__Agathobaculum;s__	31	0	5.68e-08
GUT_GENOME016937|NODE_1035_length_14529_cov_8.15276|1|5	SRR18174458|k141_12163_flag=1_multi=5.0000_len=1888	Lenarviricota	GUT_GENOME140268	d__Bacteria;p__Firmicutes_A;c__Clostridia;o__Oscillospirales;f__Butyricicoccaceae;g__Agathobaculum;s__	39	1	1.58e-08
GUT_GENOME016937|NODE_1035_length_14529_cov_8.15276|1|5	SRR11450580|k141_277615_flag=1_multi=158.0000_len=4153	Lenarviricota	GUT_GENOME140268	d__Bacteria;p__Firmicutes_A;c__Clostridia;o__Oscillospirales;f__Butyricicoccaceae;g__Agathobaculum;s__	31	0	5.68e-08
GUT_GENOME016937|NODE_1035_length_14529_cov_8.15276|1|5	SRR5208451|k141_105338_flag=1_multi=20.6073_len=4546	Kitrinoviricota	GUT_GENOME140268	d__Bacteria;p__Firmicutes_A;c__Clostridia;o__Oscillospirales;f__Butyricicoccaceae;g__Agathobaculum;s__	39	1	1.58e-08
GUT_GENOME016937|NODE_1035_length_14529_cov_8.15276|1|5	SRR11450585|k141_324598_flag=1_multi=9.0000_len=1572	Lenarviricota	GUT_GENOME140268	d__Bacteria;p__Firmicutes_A;c__Clostridia;o__Oscillospirales;f__Butyricicoccaceae;g__Agathobaculum;s__	31	0	5.68e-08
GUT_GENOME016937|NODE_1035_length_14529_cov_8.15276|1|5	SRR10849400|k141_327844_flag=1_multi=5.0000_len=1184	Lenarviricota	GUT_GENOME140268	d__Bacteria;p__Firmicutes_A;c__Clostridia;o__Oscillospirales;f__Butyricicoccaceae;g__Agathobaculum;s__	36	0	1.58e-08
GUT_GENOME016937|NODE_1035_length_14529_cov_8.15276|1|5	SRR11827441|k141_28014_flag=0_multi=14.6821_len=1110	Kitrinoviricota	GUT_GENOME140268	d__Bacteria;p__Firmicutes_A;c__Clostridia;o__Oscillospirales;f__Butyricicoccaceae;g__Agathobaculum;s__	32	0	1.58e-08
GUT_GENOME016937|NODE_1035_length_14529_cov_8.15276|1|5	SRR17509979|k141_53443_flag=1_multi=169.8080_len=4630	Kitrinoviricota	GUT_GENOME140268	d__Bacteria;p__Firmicutes_A;c__Clostridia;o__Oscillospirales;f__Butyricicoccaceae;g__Agathobaculum;s__	32	0	1.58e-08
GUT_GENOME016937|NODE_1035_length_14529_cov_8.15276|1|5	SRR18771420|k141_72749_flag=1_multi=6.0000_len=1523	Lenarviricota	GUT_GENOME140268	d__Bacteria;p__Firmicutes_A;c__Clostridia;o__Oscillospirales;f__Butyricicoccaceae;g__Agathobaculum;s__	38	0	1.22e-09
GUT_GENOME016937|NODE_1035_length_14529_cov_8.15276|1|5	SRR18771420|k141_73453_flag=1_multi=132.0000_len=2225	Lenarviricota	GUT_GENOME140268	d__Bacteria;p__Firmicutes_A;c__Clostridia;o__Oscillospirales;f__Butyricicoccaceae;g__Agathobaculum;s__	31	0	5.68e-08
GUT_GENOME016937|NODE_1035_length_14529_cov_8.15276|1|5	SRR11450580|k141_19512_flag=1_multi=68.5328_len=3750	Kitrinoviricota	GUT_GENOME140268	d__Bacteria;p__Firmicutes_A;c__Clostridia;o__Oscillospirales;f__Butyricicoccaceae;g__Agathobaculum;s__	32	0	1.58e-08
GUT_GENOME016937|NODE_1035_length_14529_cov_8.15276|1|5	SRR11450578|k141_120500_flag=1_multi=7.0000_len=1028	Lenarviricota	GUT_GENOME140268	d__Bacteria;p__Firmicutes_A;c__Clostridia;o__Oscillospirales;f__Butyricicoccaceae;g__Agathobaculum;s__	36	0	1.58e-08
GUT_GENOME016937|NODE_1035_length_14529_cov_8.15276|1|5	SRR11450577|k141_82160_flag=1_multi=87.0000_len=3457	Kitrinoviricota	GUT_GENOME140268	d__Bacteria;p__Firmicutes_A;c__Clostridia;o__Oscillospirales;f__Butyricicoccaceae;g__Agathobaculum;s__	40	0	9.44e-11
GUT_GENOME016937|NODE_1035_length_14529_cov_8.15276|1|5	SRR17497063|k141_47107_flag=1_multi=368.0000_len=1662	Pisuviricota	GUT_GENOME140268	d__Bacteria;p__Firmicutes_A;c__Clostridia;o__Oscillospirales;f__Butyricicoccaceae;g__Agathobaculum;s__	38	1	5.68e-08
GUT_GENOME016937|NODE_1035_length_14529_cov_8.15276|1|5	SRR11622354|k141_215116_flag=1_multi=105.0000_len=4020	Lenarviricota	GUT_GENOME140268	d__Bacteria;p__Firmicutes_A;c__Clostridia;o__Oscillospirales;f__Butyricicoccaceae;g__Agathobaculum;s__	32	0	1.58e-08
GUT_GENOME016937|NODE_1035_length_14529_cov_8.15276|1|5	SRR10849941|k141_457685_flag=0_multi=3.9495_len=1448	Lenarviricota	GUT_GENOME140268	d__Bacteria;p__Firmicutes_A;c__Clostridia;o__Oscillospirales;f__Butyricicoccaceae;g__Agathobaculum;s__	32	0	1.58e-08
GUT_GENOME016937|NODE_1035_length_14529_cov_8.15276|1|5	SRR12685024|k141_131503_flag=1_multi=7.0000_len=2088	Duplornaviricota	GUT_GENOME140268	d__Bacteria;p__Firmicutes_A;c__Clostridia;o__Oscillospirales;f__Butyricicoccaceae;g__Agathobaculum;s__	31	0	5.68e-08
GUT_GENOME016937|NODE_1035_length_14529_cov_8.15276|1|5	SRR11450579|k141_10495_flag=1_multi=14.0000_len=4016	Lenarviricota	GUT_GENOME140268	d__Bacteria;p__Firmicutes_A;c__Clostridia;o__Oscillospirales;f__Butyricicoccaceae;g__Agathobaculum;s__	32	0	1.58e-08
GUT_GENOME016937|NODE_1035_length_14529_cov_8.15276|1|5	SRR11829260|k141_114309_flag=1_multi=19.0000_len=1818	Pisuviricota	GUT_GENOME140268	d__Bacteria;p__Firmicutes_A;c__Clostridia;o__Oscillospirales;f__Butyricicoccaceae;g__Agathobaculum;s__	37	0	4.39e-09
GUT_GENOME016937|NODE_1035_length_14529_cov_8.15276|1|5	SRR11450577|k141_64001_flag=1_multi=14.0000_len=6033	Unclassified	GUT_GENOME140268	d__Bacteria;p__Firmicutes_A;c__Clostridia;o__Oscillospirales;f__Butyricicoccaceae;g__Agathobaculum;s__	31	0	5.68e-08
GUT_GENOME016937|NODE_1035_length_14529_cov_8.15276|1|5	SRR11829101|k141_78115_flag=1_multi=2.8570_len=1498	Pisuviricota	GUT_GENOME140268	d__Bacteria;p__Firmicutes_A;c__Clostridia;o__Oscillospirales;f__Butyricicoccaceae;g__Agathobaculum;s__	32	0	1.58e-08
GUT_GENOME016937|NODE_1035_length_14529_cov_8.15276|1|5	SRR11829101|k141_42633_flag=1_multi=112.0000_len=1562	Pisuviricota	GUT_GENOME140268	d__Bacteria;p__Firmicutes_A;c__Clostridia;o__Oscillospirales;f__Butyricicoccaceae;g__Agathobaculum;s__	32	0	1.58e-08
GUT_GENOME016937|NODE_1035_length_14529_cov_8.15276|1|5	SRR11450580|k141_19512_flag=1_multi=68.5328_len=3750	Kitrinoviricota	GUT_GENOME140268	d__Bacteria;p__Firmicutes_A;c__Clostridia;o__Oscillospirales;f__Butyricicoccaceae;g__Agathobaculum;s__	32	0	1.58e-08
GUT_GENOME016937|NODE_1035_length_14529_cov_8.15276|1|5	SRR11450577|k141_69774_flag=1_multi=24.0000_len=2895	Lenarviricota	GUT_GENOME140268	d__Bacteria;p__Firmicutes_A;c__Clostridia;o__Oscillospirales;f__Butyricicoccaceae;g__Agathobaculum;s__	32	0	1.58e-08
GUT_GENOME016937|NODE_1035_length_14529_cov_8.15276|1|5	SRR12685204|k141_19337_flag=1_multi=6.0000_len=2702	Lenarviricota	GUT_GENOME140268	d__Bacteria;p__Firmicutes_A;c__Clostridia;o__Oscillospirales;f__Butyricicoccaceae;g__Agathobaculum;s__	31	0	5.68e-08
GUT_GENOME016937|NODE_1035_length_14529_cov_8.15276|1|5	SRR11450577|k141_117535_flag=1_multi=14.0000_len=3803	Lenarviricota	GUT_GENOME140268	d__Bacteria;p__Firmicutes_A;c__Clostridia;o__Oscillospirales;f__Butyricicoccaceae;g__Agathobaculum;s__	38	1	5.68e-08
GUT_GENOME016937|NODE_1035_length_14529_cov_8.15276|1|5	SRR11450586|k141_8426_flag=1_multi=13.0000_len=3907	Lenarviricota	GUT_GENOME140268	d__Bacteria;p__Firmicutes_A;c__Clostridia;o__Oscillospirales;f__Butyricicoccaceae;g__Agathobaculum;s__	34	1	5.68e-08
GUT_GENOME016937|NODE_1035_length_14529_cov_8.15276|1|5	SRR11828959|k141_74289_flag=1_multi=13.0000_len=3764	Duplornaviricota	GUT_GENOME140268	d__Bacteria;p__Firmicutes_A;c__Clostridia;o__Oscillospirales;f__Butyricicoccaceae;g__Agathobaculum;s__	32	0	1.58e-08
GUT_GENOME016937|NODE_1035_length_14529_cov_8.15276|1|5	SRR10849374|k141_217233_flag=1_multi=622.0000_len=4287	Lenarviricota	GUT_GENOME140268	d__Bacteria;p__Firmicutes_A;c__Clostridia;o__Oscillospirales;f__Butyricicoccaceae;g__Agathobaculum;s__	36	1	4.39e-09
GUT_GENOME016937|NODE_1035_length_14529_cov_8.15276|1|5	SRR12685793|k141_180701_flag=1_multi=48.0000_len=5315	Kitrinoviricota	GUT_GENOME140268	d__Bacteria;p__Firmicutes_A;c__Clostridia;o__Oscillospirales;f__Butyricicoccaceae;g__Agathobaculum;s__	32	0	1.58e-08
GUT_GENOME016937|NODE_1035_length_14529_cov_8.15276|1|5	SRR12685051|k141_67305_flag=1_multi=20.0000_len=2304	Lenarviricota	GUT_GENOME140268	d__Bacteria;p__Firmicutes_A;c__Clostridia;o__Oscillospirales;f__Butyricicoccaceae;g__Agathobaculum;s__	31	0	5.68e-08
GUT_GENOME016937|NODE_1035_length_14529_cov_8.15276|1|5	SRR11827441|k141_78103_flag=1_multi=8.0000_len=3713	Pisuviricota	GUT_GENOME140268	d__Bacteria;p__Firmicutes_A;c__Clostridia;o__Oscillospirales;f__Butyricicoccaceae;g__Agathobaculum;s__	37	0	4.39e-09
GUT_GENOME016937|NODE_1035_length_14529_cov_8.15276|1|5	SRR11450579|k141_227750_flag=1_multi=91.0000_len=5780	Pisuviricota	GUT_GENOME140268	d__Bacteria;p__Firmicutes_A;c__Clostridia;o__Oscillospirales;f__Butyricicoccaceae;g__Agathobaculum;s__	32	0	1.58e-08
GUT_GENOME016937|NODE_1035_length_14529_cov_8.15276|1|5	SRR11829001|k141_126192_flag=1_multi=4.0000_len=1662	Pisuviricota	GUT_GENOME140268	d__Bacteria;p__Firmicutes_A;c__Clostridia;o__Oscillospirales;f__Butyricicoccaceae;g__Agathobaculum;s__	32	0	1.58e-08
GUT_GENOME016937|NODE_1035_length_14529_cov_8.15276|1|5	SRR11450586|k141_213458_flag=1_multi=6442.8094_len=10045	Pisuviricota	GUT_GENOME140268	d__Bacteria;p__Firmicutes_A;c__Clostridia;o__Oscillospirales;f__Butyricicoccaceae;g__Agathobaculum;s__	31	0	5.68e-08
GUT_GENOME016937|NODE_1035_length_14529_cov_8.15276|1|5	SRR11450577|k141_69245_flag=1_multi=12.0000_len=2690	Pisuviricota	GUT_GENOME140268	d__Bacteria;p__Firmicutes_A;c__Clostridia;o__Oscillospirales;f__Butyricicoccaceae;g__Agathobaculum;s__	32	0	1.58e-08
GUT_GENOME016937|NODE_1035_length_14529_cov_8.15276|1|5	SRR18771337|k141_159487_flag=1_multi=6.0000_len=1425	Lenarviricota	GUT_GENOME140268	d__Bacteria;p__Firmicutes_A;c__Clostridia;o__Oscillospirales;f__Butyricicoccaceae;g__Agathobaculum;s__	31	0	5.68e-08
GUT_GENOME016937|NODE_1035_length_14529_cov_8.15276|1|5	SRR11076227|k141_95875_flag=1_multi=116.2434_len=3974	Lenarviricota	GUT_GENOME140268	d__Bacteria;p__Firmicutes_A;c__Clostridia;o__Oscillospirales;f__Butyricicoccaceae;g__Agathobaculum;s__	36	0	1.58e-08
GUT_GENOME016937|NODE_1035_length_14529_cov_8.15276|1|5	SRR11648395|k141_6028_flag=1_multi=156.0000_len=4129	Kitrinoviricota	GUT_GENOME140268	d__Bacteria;p__Firmicutes_A;c__Clostridia;o__Oscillospirales;f__Butyricicoccaceae;g__Agathobaculum;s__	35	1	1.58e-08
GUT_GENOME016937|NODE_1035_length_14529_cov_8.15276|1|5	SRR11828958|k141_54045_flag=1_multi=20.0000_len=1182	Kitrinoviricota	GUT_GENOME140268	d__Bacteria;p__Firmicutes_A;c__Clostridia;o__Oscillospirales;f__Butyricicoccaceae;g__Agathobaculum;s__	31	0	5.68e-08
GUT_GENOME016937|NODE_1035_length_14529_cov_8.15276|1|5	SRR17509979|k141_17026_flag=1_multi=263.6760_len=2576	Lenarviricota	GUT_GENOME140268	d__Bacteria;p__Firmicutes_A;c__Clostridia;o__Oscillospirales;f__Butyricicoccaceae;g__Agathobaculum;s__	31	0	5.68e-08
GUT_GENOME016937|NODE_1035_length_14529_cov_8.15276|1|5	SRR11622286|k141_317470_flag=1_multi=35.0000_len=3053	Lenarviricota	GUT_GENOME140268	d__Bacteria;p__Firmicutes_A;c__Clostridia;o__Oscillospirales;f__Butyricicoccaceae;g__Agathobaculum;s__	32	0	1.58e-08
GUT_GENOME016937|NODE_1035_length_14529_cov_8.15276|1|5	SRR17497060|k141_140346_flag=1_multi=954.0000_len=4296	Lenarviricota	GUT_GENOME140268	d__Bacteria;p__Firmicutes_A;c__Clostridia;o__Oscillospirales;f__Butyricicoccaceae;g__Agathobaculum;s__	35	0	3.39e-10
GUT_GENOME016937|NODE_1035_length_14529_cov_8.15276|1|5	SRR11828460|k141_25998_flag=1_multi=30.0000_len=2094	Pisuviricota	GUT_GENOME140268	d__Bacteria;p__Firmicutes_A;c__Clostridia;o__Oscillospirales;f__Butyricicoccaceae;g__Agathobaculum;s__	32	0	1.58e-08
GUT_GENOME016937|NODE_1035_length_14529_cov_8.15276|1|5	SRR12685052|k141_36284_flag=1_multi=21.0000_len=3823	Lenarviricota	GUT_GENOME140268	d__Bacteria;p__Firmicutes_A;c__Clostridia;o__Oscillospirales;f__Butyricicoccaceae;g__Agathobaculum;s__	31	0	5.68e-08
GUT_GENOME016937|NODE_1035_length_14529_cov_8.15276|1|5	SRR10849403|k141_110868_flag=1_multi=132.0000_len=4175	Lenarviricota	GUT_GENOME140268	d__Bacteria;p__Firmicutes_A;c__Clostridia;o__Oscillospirales;f__Butyricicoccaceae;g__Agathobaculum;s__	32	0	1.58e-08
GUT_GENOME016937|NODE_1035_length_14529_cov_8.15276|1|5	SRR11565438|k141_130730_flag=1_multi=7.0000_len=3133	Kitrinoviricota	GUT_GENOME140268	d__Bacteria;p__Firmicutes_A;c__Clostridia;o__Oscillospirales;f__Butyricicoccaceae;g__Agathobaculum;s__	31	0	5.68e-08
GUT_GENOME016937|NODE_1035_length_14529_cov_8.15276|1|5	SRR12334071|k141_139227_flag=1_multi=22.0000_len=3130	Lenarviricota	GUT_GENOME140268	d__Bacteria;p__Firmicutes_A;c__Clostridia;o__Oscillospirales;f__Butyricicoccaceae;g__Agathobaculum;s__	31	0	5.68e-08
GUT_GENOME016937|NODE_1035_length_14529_cov_8.15276|1|5	SRR11450579|k141_12298_flag=1_multi=79.0000_len=3127	Kitrinoviricota	GUT_GENOME140268	d__Bacteria;p__Firmicutes_A;c__Clostridia;o__Oscillospirales;f__Butyricicoccaceae;g__Agathobaculum;s__	32	0	1.58e-08
GUT_GENOME016937|NODE_1035_length_14529_cov_8.15276|1|5	SRR11828958|k141_53529_flag=1_multi=89.0000_len=3960	Lenarviricota	GUT_GENOME140268	d__Bacteria;p__Firmicutes_A;c__Clostridia;o__Oscillospirales;f__Butyricicoccaceae;g__Agathobaculum;s__	32	0	1.58e-08
GUT_GENOME016937|NODE_1035_length_14529_cov_8.15276|1|5	SRR11450580|k141_155847_flag=1_multi=13.0000_len=4309	Lenarviricota	GUT_GENOME140268	d__Bacteria;p__Firmicutes_A;c__Clostridia;o__Oscillospirales;f__Butyricicoccaceae;g__Agathobaculum;s__	32	0	1.58e-08
GUT_GENOME016937|NODE_1035_length_14529_cov_8.15276|1|5	SRR11828805|k141_324405_flag=1_multi=94.0000_len=4748	Kitrinoviricota	GUT_GENOME140268	d__Bacteria;p__Firmicutes_A;c__Clostridia;o__Oscillospirales;f__Butyricicoccaceae;g__Agathobaculum;s__	31	0	5.68e-08
GUT_GENOME016937|NODE_1035_length_14529_cov_8.15276|1|5	SRR8554642|k141_88376_flag=1_multi=943.0000_len=2281	Pisuviricota	GUT_GENOME140268	d__Bacteria;p__Firmicutes_A;c__Clostridia;o__Oscillospirales;f__Butyricicoccaceae;g__Agathobaculum;s__	35	0	5.68e-08
GUT_GENOME016937|NODE_1035_length_14529_cov_8.15276|1|5	SRR5829904|k141_13251_flag=1_multi=115.0000_len=4476	Lenarviricota	GUT_GENOME140268	d__Bacteria;p__Firmicutes_A;c__Clostridia;o__Oscillospirales;f__Butyricicoccaceae;g__Agathobaculum;s__	32	0	1.58e-08
GUT_GENOME016937|NODE_1035_length_14529_cov_8.15276|1|5	SRR11450585|k141_69812_flag=1_multi=25.0000_len=3509	Lenarviricota	GUT_GENOME140268	d__Bacteria;p__Firmicutes_A;c__Clostridia;o__Oscillospirales;f__Butyricicoccaceae;g__Agathobaculum;s__	32	0	1.58e-08
GUT_GENOME016937|NODE_1035_length_14529_cov_8.15276|1|5	SRR11828806|k141_12201_flag=1_multi=47.0000_len=11953	Kitrinoviricota	GUT_GENOME140268	d__Bacteria;p__Firmicutes_A;c__Clostridia;o__Oscillospirales;f__Butyricicoccaceae;g__Agathobaculum;s__	31	0	5.68e-08
GUT_GENOME016937|NODE_1035_length_14529_cov_8.15276|1|5	SRR12685017|k141_56209_flag=1_multi=35.8431_len=5050	Pisuviricota	GUT_GENOME140268	d__Bacteria;p__Firmicutes_A;c__Clostridia;o__Oscillospirales;f__Butyricicoccaceae;g__Agathobaculum;s__	32	0	1.58e-08
GUT_GENOME016937|NODE_1035_length_14529_cov_8.15276|1|5	SRR11450579|k141_228153_flag=1_multi=8.0000_len=1604	Kitrinoviricota	GUT_GENOME140268	d__Bacteria;p__Firmicutes_A;c__Clostridia;o__Oscillospirales;f__Butyricicoccaceae;g__Agathobaculum;s__	32	0	1.58e-08
GUT_GENOME016937|NODE_1035_length_14529_cov_8.15276|1|5	SRR10849807|k141_286676_flag=1_multi=13.0000_len=3913	Lenarviricota	GUT_GENOME140268	d__Bacteria;p__Firmicutes_A;c__Clostridia;o__Oscillospirales;f__Butyricicoccaceae;g__Agathobaculum;s__	32	0	1.58e-08
GUT_GENOME016937|NODE_1035_length_14529_cov_8.15276|1|5	SRR11828456|k141_27593_flag=1_multi=93.0000_len=8020	Unclassified	GUT_GENOME140268	d__Bacteria;p__Firmicutes_A;c__Clostridia;o__Oscillospirales;f__Butyricicoccaceae;g__Agathobaculum;s__	34	1	5.68e-08
GUT_GENOME016937|NODE_1035_length_14529_cov_8.15276|1|5	SRR11450577|k141_51006_flag=1_multi=30.0000_len=2275	Pisuviricota	GUT_GENOME140268	d__Bacteria;p__Firmicutes_A;c__Clostridia;o__Oscillospirales;f__Butyricicoccaceae;g__Agathobaculum;s__	36	0	1.58e-08
GUT_GENOME016937|NODE_1035_length_14529_cov_8.15276|1|5	SRR13696271|k141_127261_flag=1_multi=4.0000_len=1612	Lenarviricota	GUT_GENOME140268	d__Bacteria;p__Firmicutes_A;c__Clostridia;o__Oscillospirales;f__Butyricicoccaceae;g__Agathobaculum;s__	36	0	1.58e-08
GUT_GENOME016937|NODE_1035_length_14529_cov_8.15276|1|5	SRR10849807|k141_62260_flag=1_multi=9.0000_len=2455	Lenarviricota	GUT_GENOME140268	d__Bacteria;p__Firmicutes_A;c__Clostridia;o__Oscillospirales;f__Butyricicoccaceae;g__Agathobaculum;s__	31	0	5.68e-08
GUT_GENOME016937|NODE_1035_length_14529_cov_8.15276|1|5	SRR11450579|k141_21275_flag=1_multi=13.0000_len=1851	Pisuviricota	GUT_GENOME140268	d__Bacteria;p__Firmicutes_A;c__Clostridia;o__Oscillospirales;f__Butyricicoccaceae;g__Agathobaculum;s__	32	0	1.58e-08
GUT_GENOME016937|NODE_1035_length_14529_cov_8.15276|1|5	SRR11076227|k141_493654_flag=1_multi=46.0000_len=7060	Kitrinoviricota	GUT_GENOME140268	d__Bacteria;p__Firmicutes_A;c__Clostridia;o__Oscillospirales;f__Butyricicoccaceae;g__Agathobaculum;s__	32	0	1.58e-08
GUT_GENOME016937|NODE_1035_length_14529_cov_8.15276|1|5	SRR12685204|k141_29382_flag=1_multi=95.0000_len=3532	Lenarviricota	GUT_GENOME140268	d__Bacteria;p__Firmicutes_A;c__Clostridia;o__Oscillospirales;f__Butyricicoccaceae;g__Agathobaculum;s__	32	0	1.58e-08
GUT_GENOME016937|NODE_1035_length_14529_cov_8.15276|1|5	SRR11450579|k141_214657_flag=1_multi=44.0000_len=4160	Lenarviricota	GUT_GENOME140268	d__Bacteria;p__Firmicutes_A;c__Clostridia;o__Oscillospirales;f__Butyricicoccaceae;g__Agathobaculum;s__	35	0	3.39e-10
GUT_GENOME016937|NODE_1035_length_14529_cov_8.15276|1|5	SRR11828459|k141_13652_flag=1_multi=8.0000_len=2541	Kitrinoviricota	GUT_GENOME140268	d__Bacteria;p__Firmicutes_A;c__Clostridia;o__Oscillospirales;f__Butyricicoccaceae;g__Agathobaculum;s__	31	0	5.68e-08
GUT_GENOME016937|NODE_1035_length_14529_cov_8.15276|1|5	SRR11648412|k141_10167_flag=1_multi=11.0000_len=5773	Kitrinoviricota	GUT_GENOME140268	d__Bacteria;p__Firmicutes_A;c__Clostridia;o__Oscillospirales;f__Butyricicoccaceae;g__Agathobaculum;s__	34	1	5.68e-08
GUT_GENOME016937|NODE_1035_length_14529_cov_8.15276|1|5	SRR11450579|k141_223081_flag=1_multi=72.0000_len=4415	Lenarviricota	GUT_GENOME140268	d__Bacteria;p__Firmicutes_A;c__Clostridia;o__Oscillospirales;f__Butyricicoccaceae;g__Agathobaculum;s__	31	0	5.68e-08
GUT_GENOME016937|NODE_1035_length_14529_cov_8.15276|1|5	SRR11829331|k141_326413_flag=1_multi=4.6037_len=1988	Lenarviricota	GUT_GENOME140268	d__Bacteria;p__Firmicutes_A;c__Clostridia;o__Oscillospirales;f__Butyricicoccaceae;g__Agathobaculum;s__	36	0	1.58e-08
GUT_GENOME016937|NODE_1035_length_14529_cov_8.15276|1|5	SRR10849400|k141_301204_flag=1_multi=20.0000_len=2317	Lenarviricota	GUT_GENOME140268	d__Bacteria;p__Firmicutes_A;c__Clostridia;o__Oscillospirales;f__Butyricicoccaceae;g__Agathobaculum;s__	32	0	1.58e-08
GUT_GENOME016937|NODE_1035_length_14529_cov_8.15276|1|5	SRR10849400|k141_60606_flag=1_multi=3.0000_len=1697	Lenarviricota	GUT_GENOME140268	d__Bacteria;p__Firmicutes_A;c__Clostridia;o__Oscillospirales;f__Butyricicoccaceae;g__Agathobaculum;s__	31	0	5.68e-08
GUT_GENOME016937|NODE_1035_length_14529_cov_8.15276|1|5	SRR10849400|k141_207154_flag=1_multi=5.0000_len=1528	Unclassified	GUT_GENOME140268	d__Bacteria;p__Firmicutes_A;c__Clostridia;o__Oscillospirales;f__Butyricicoccaceae;g__Agathobaculum;s__	31	0	5.68e-08
GUT_GENOME016937|NODE_1035_length_14529_cov_8.15276|1|5	SRR11829101|k141_76522_flag=1_multi=6.0000_len=1361	urv.p.001	GUT_GENOME140268	d__Bacteria;p__Firmicutes_A;c__Clostridia;o__Oscillospirales;f__Butyricicoccaceae;g__Agathobaculum;s__	32	0	1.58e-08
GUT_GENOME016937|NODE_1035_length_14529_cov_8.15276|1|5	SRR11828594|k141_19498_flag=1_multi=7.0000_len=2652	Lenarviricota	GUT_GENOME140268	d__Bacteria;p__Firmicutes_A;c__Clostridia;o__Oscillospirales;f__Butyricicoccaceae;g__Agathobaculum;s__	31	0	5.68e-08
GUT_GENOME016937|NODE_1035_length_14529_cov_8.15276|1|5	SRR11829332|k141_201153_flag=1_multi=14.0000_len=6032	Duplornaviricota	GUT_GENOME140268	d__Bacteria;p__Firmicutes_A;c__Clostridia;o__Oscillospirales;f__Butyricicoccaceae;g__Agathobaculum;s__	31	0	5.68e-08
GUT_GENOME016937|NODE_1035_length_14529_cov_8.15276|1|5	SRR11829144|k141_29651_flag=1_multi=1231.0000_len=9490	Pisuviricota	GUT_GENOME140268	d__Bacteria;p__Firmicutes_A;c__Clostridia;o__Oscillospirales;f__Butyricicoccaceae;g__Agathobaculum;s__	31	0	5.68e-08
GUT_GENOME016937|NODE_1035_length_14529_cov_8.15276|1|5	SRR18771403|k141_153429_flag=1_multi=147.0000_len=3133	Lenarviricota	GUT_GENOME140268	d__Bacteria;p__Firmicutes_A;c__Clostridia;o__Oscillospirales;f__Butyricicoccaceae;g__Agathobaculum;s__	31	0	5.68e-08
GUT_GENOME016937|NODE_1035_length_14529_cov_8.15276|1|5	SRR7004410|k141_109159_flag=1_multi=4.9867_len=3737	Unclassified	GUT_GENOME140268	d__Bacteria;p__Firmicutes_A;c__Clostridia;o__Oscillospirales;f__Butyricicoccaceae;g__Agathobaculum;s__	31	0	5.68e-08
GUT_GENOME016937|NODE_1035_length_14529_cov_8.15276|1|5	SRR11829144|k141_45436_flag=1_multi=9.0000_len=1550	Pisuviricota	GUT_GENOME140268	d__Bacteria;p__Firmicutes_A;c__Clostridia;o__Oscillospirales;f__Butyricicoccaceae;g__Agathobaculum;s__	31	0	5.68e-08
GUT_GENOME016937|NODE_1035_length_14529_cov_8.15276|1|5	SRR11828959|k141_40630_flag=1_multi=6.0000_len=1177	Lenarviricota	GUT_GENOME140268	d__Bacteria;p__Firmicutes_A;c__Clostridia;o__Oscillospirales;f__Butyricicoccaceae;g__Agathobaculum;s__	32	0	1.58e-08
GUT_GENOME016937|NODE_1035_length_14529_cov_8.15276|1|5	SRR10849941|k141_230463_flag=1_multi=3.0000_len=1791	Lenarviricota	GUT_GENOME140268	d__Bacteria;p__Firmicutes_A;c__Clostridia;o__Oscillospirales;f__Butyricicoccaceae;g__Agathobaculum;s__	31	0	5.68e-08
GUT_GENOME016937|NODE_1035_length_14529_cov_8.15276|1|5	SRR11648360|k141_187449_flag=1_multi=2812.0000_len=9848	Pisuviricota	GUT_GENOME140268	d__Bacteria;p__Firmicutes_A;c__Clostridia;o__Oscillospirales;f__Butyricicoccaceae;g__Agathobaculum;s__	33	0	4.39e-09
GUT_GENOME016937|NODE_1035_length_14529_cov_8.15276|1|5	SRR11622682|k141_162194_flag=1_multi=8.0000_len=1224	Kitrinoviricota	GUT_GENOME140268	d__Bacteria;p__Firmicutes_A;c__Clostridia;o__Oscillospirales;f__Butyricicoccaceae;g__Agathobaculum;s__	32	0	1.58e-08
GUT_GENOME016937|NODE_1035_length_14529_cov_8.15276|1|5	SRR11450586|k141_204083_flag=0_multi=11.0000_len=1953	Lenarviricota	GUT_GENOME140268	d__Bacteria;p__Firmicutes_A;c__Clostridia;o__Oscillospirales;f__Butyricicoccaceae;g__Agathobaculum;s__	33	0	4.39e-09
GUT_GENOME016937|NODE_1035_length_14529_cov_8.15276|1|5	SRR11450580|k141_282798_flag=1_multi=81.0000_len=2014	Lenarviricota	GUT_GENOME140268	d__Bacteria;p__Firmicutes_A;c__Clostridia;o__Oscillospirales;f__Butyricicoccaceae;g__Agathobaculum;s__	37	0	4.39e-09
GUT_GENOME016937|NODE_1035_length_14529_cov_8.15276|1|5	SRR7007032|k141_399459_flag=0_multi=27.0120_len=4218	Kitrinoviricota	GUT_GENOME140268	d__Bacteria;p__Firmicutes_A;c__Clostridia;o__Oscillospirales;f__Butyricicoccaceae;g__Agathobaculum;s__	32	0	1.58e-08
GUT_GENOME016937|NODE_1035_length_14529_cov_8.15276|1|5	SRR11829511|k141_5066_flag=1_multi=494.0000_len=7158	Duplornaviricota	GUT_GENOME140268	d__Bacteria;p__Firmicutes_A;c__Clostridia;o__Oscillospirales;f__Butyricicoccaceae;g__Agathobaculum;s__	32	0	1.58e-08
GUT_GENOME016937|NODE_1035_length_14529_cov_8.15276|1|5	SRR5208545|k141_12323_flag=1_multi=4.0000_len=2836	Kitrinoviricota	GUT_GENOME140268	d__Bacteria;p__Firmicutes_A;c__Clostridia;o__Oscillospirales;f__Butyricicoccaceae;g__Agathobaculum;s__	32	0	1.58e-08
GUT_GENOME016937|NODE_1035_length_14529_cov_8.15276|1|5	SRR17497069|k141_113094_flag=1_multi=39.0000_len=1742	Pisuviricota	GUT_GENOME140268	d__Bacteria;p__Firmicutes_A;c__Clostridia;o__Oscillospirales;f__Butyricicoccaceae;g__Agathobaculum;s__	37	0	4.39e-09
GUT_GENOME016937|NODE_1035_length_14529_cov_8.15276|1|5	SRR11450579|k141_215862_flag=1_multi=8.0000_len=1347	Kitrinoviricota	GUT_GENOME140268	d__Bacteria;p__Firmicutes_A;c__Clostridia;o__Oscillospirales;f__Butyricicoccaceae;g__Agathobaculum;s__	31	0	5.68e-08
GUT_GENOME016937|NODE_1035_length_14529_cov_8.15276|1|5	SRR11622660|k141_569183_flag=1_multi=1299.0000_len=3620	Lenarviricota	GUT_GENOME140268	d__Bacteria;p__Firmicutes_A;c__Clostridia;o__Oscillospirales;f__Butyricicoccaceae;g__Agathobaculum;s__	32	0	1.58e-08
GUT_GENOME016937|NODE_1035_length_14529_cov_8.15276|1|5	SRR11450579|k141_206779_flag=1_multi=7.0000_len=1511	Pisuviricota	GUT_GENOME140268	d__Bacteria;p__Firmicutes_A;c__Clostridia;o__Oscillospirales;f__Butyricicoccaceae;g__Agathobaculum;s__	32	0	1.58e-08
GUT_GENOME016937|NODE_1035_length_14529_cov_8.15276|1|5	SRR10849941|k141_162945_flag=1_multi=44.0000_len=4862	Lenarviricota	GUT_GENOME140268	d__Bacteria;p__Firmicutes_A;c__Clostridia;o__Oscillospirales;f__Butyricicoccaceae;g__Agathobaculum;s__	32	0	1.58e-08
GUT_GENOME016937|NODE_1035_length_14529_cov_8.15276|1|5	SRR11648359|k141_71840_flag=1_multi=30.0000_len=6076	Kitrinoviricota	GUT_GENOME140268	d__Bacteria;p__Firmicutes_A;c__Clostridia;o__Oscillospirales;f__Butyricicoccaceae;g__Agathobaculum;s__	32	0	1.58e-08
GUT_GENOME016937|NODE_1035_length_14529_cov_8.15276|1|5	SRR11450586|k141_29179_flag=1_multi=15.0000_len=1131	Pisuviricota	GUT_GENOME140268	d__Bacteria;p__Firmicutes_A;c__Clostridia;o__Oscillospirales;f__Butyricicoccaceae;g__Agathobaculum;s__	36	0	1.58e-08
GUT_GENOME016937|NODE_1035_length_14529_cov_8.15276|1|5	SRR7535528|k141_221535_flag=1_multi=17.0000_len=6657	urv.p.001	GUT_GENOME140268	d__Bacteria;p__Firmicutes_A;c__Clostridia;o__Oscillospirales;f__Butyricicoccaceae;g__Agathobaculum;s__	31	0	5.68e-08
GUT_GENOME016937|NODE_1035_length_14529_cov_8.15276|1|5	SRR11450579|k141_56400_flag=1_multi=12.0000_len=1074	Pisuviricota	GUT_GENOME140268	d__Bacteria;p__Firmicutes_A;c__Clostridia;o__Oscillospirales;f__Butyricicoccaceae;g__Agathobaculum;s__	31	0	5.68e-08
GUT_GENOME016937|NODE_1035_length_14529_cov_8.15276|1|5	SRR11829332|k141_115731_flag=1_multi=894.0000_len=3674	Lenarviricota	GUT_GENOME140268	d__Bacteria;p__Firmicutes_A;c__Clostridia;o__Oscillospirales;f__Butyricicoccaceae;g__Agathobaculum;s__	32	0	1.58e-08
GUT_GENOME016937|NODE_1035_length_14529_cov_8.15276|1|5	SRR11450586|k141_143707_flag=1_multi=7.0000_len=2243	Pisuviricota	GUT_GENOME140268	d__Bacteria;p__Firmicutes_A;c__Clostridia;o__Oscillospirales;f__Butyricicoccaceae;g__Agathobaculum;s__	31	0	5.68e-08
GUT_GENOME016937|NODE_1035_length_14529_cov_8.15276|1|5	SRR11829511|k141_5066_flag=1_multi=494.0000_len=7158	Duplornaviricota	GUT_GENOME140268	d__Bacteria;p__Firmicutes_A;c__Clostridia;o__Oscillospirales;f__Butyricicoccaceae;g__Agathobaculum;s__	32	0	1.58e-08
GUT_GENOME016937|NODE_1035_length_14529_cov_8.15276|1|5	SRR17497069|k141_113094_flag=1_multi=39.0000_len=1742	Pisuviricota	GUT_GENOME140268	d__Bacteria;p__Firmicutes_A;c__Clostridia;o__Oscillospirales;f__Butyricicoccaceae;g__Agathobaculum;s__	37	0	4.39e-09
GUT_GENOME016937|NODE_1035_length_14529_cov_8.15276|1|5	SRR11450577|k141_184159_flag=1_multi=153.0000_len=3991	Lenarviricota	GUT_GENOME140268	d__Bacteria;p__Firmicutes_A;c__Clostridia;o__Oscillospirales;f__Butyricicoccaceae;g__Agathobaculum;s__	39	0	1.58e-08
GUT_GENOME016937|NODE_1035_length_14529_cov_8.15276|1|5	SRR11450577|k141_166884_flag=1_multi=7.0000_len=1247	Lenarviricota	GUT_GENOME140268	d__Bacteria;p__Firmicutes_A;c__Clostridia;o__Oscillospirales;f__Butyricicoccaceae;g__Agathobaculum;s__	37	0	4.39e-09
GUT_GENOME016937|NODE_1035_length_14529_cov_8.15276|1|5	SRR8554642|k141_88376_flag=1_multi=943.0000_len=2281	Pisuviricota	GUT_GENOME140268	d__Bacteria;p__Firmicutes_A;c__Clostridia;o__Oscillospirales;f__Butyricicoccaceae;g__Agathobaculum;s__	35	0	5.68e-08
GUT_GENOME016937|NODE_1035_length_14529_cov_8.15276|1|5	SRR11450579|k141_194130_flag=1_multi=167.0000_len=4331	Lenarviricota	GUT_GENOME140268	d__Bacteria;p__Firmicutes_A;c__Clostridia;o__Oscillospirales;f__Butyricicoccaceae;g__Agathobaculum;s__	31	0	5.68e-08
GUT_GENOME016937|NODE_1035_length_14529_cov_8.15276|1|5	SRR7004413|k141_377540_flag=1_multi=17.0000_len=3476	Lenarviricota	GUT_GENOME140268	d__Bacteria;p__Firmicutes_A;c__Clostridia;o__Oscillospirales;f__Butyricicoccaceae;g__Agathobaculum;s__	32	0	1.58e-08
GUT_GENOME016937|NODE_1035_length_14529_cov_8.15276|1|5	SRR11829144|k141_15253_flag=1_multi=48.0000_len=6946	Kitrinoviricota	GUT_GENOME140268	d__Bacteria;p__Firmicutes_A;c__Clostridia;o__Oscillospirales;f__Butyricicoccaceae;g__Agathobaculum;s__	31	0	5.68e-08
GUT_GENOME016937|NODE_1035_length_14529_cov_8.15276|1|5	SRR11450577|k141_143079_flag=1_multi=61.0000_len=3479	Kitrinoviricota	GUT_GENOME140268	d__Bacteria;p__Firmicutes_A;c__Clostridia;o__Oscillospirales;f__Butyricicoccaceae;g__Agathobaculum;s__	32	0	1.58e-08
GUT_GENOME017202|NODE_20_length_201261_cov_12.2072|1|5	SRR8554642|k141_118173_flag=1_multi=33.1192_len=9626	Pisuviricota	GUT_GENOME140786	d__Bacteria;p__Firmicutes_A;c__Clostridia;o__Oscillospirales;f__Ruminococcaceae;g__Ruminococcus_D;s__Ruminococcus_D bicirculans	23	0	0.000407
GUT_GENOME017247|NODE_187_length_63871_cov_28.525|1|5	SRR11649087|k141_62756_flag=1_multi=5.9805_len=5783	Pisuviricota	GUT_GENOME247791	d__Bacteria;p__Firmicutes_A;c__Clostridia;o__Oscillospirales;f__Ruminococcaceae;g__Faecalibacterium;s__	26	1	0.000148
GUT_GENOME017247|NODE_187_length_63871_cov_28.525|1|5	SRR11829332|k141_140645_flag=1_multi=5.0000_len=2837	Pisuviricota	GUT_GENOME247791	d__Bacteria;p__Firmicutes_A;c__Clostridia;o__Oscillospirales;f__Ruminococcaceae;g__Faecalibacterium;s__	24	0	4.12e-05
GUT_GENOME017247|NODE_187_length_63871_cov_28.525|1|5	SRR11829332|k141_140645_flag=1_multi=5.0000_len=2837	Pisuviricota	GUT_GENOME247791	d__Bacteria;p__Firmicutes_A;c__Clostridia;o__Oscillospirales;f__Ruminococcaceae;g__Faecalibacterium;s__	24	0	4.12e-05
GUT_GENOME017247|NODE_187_length_63871_cov_28.525|1|5	SRR11649087|k141_62756_flag=1_multi=5.9805_len=5783	Pisuviricota	GUT_GENOME247791	d__Bacteria;p__Firmicutes_A;c__Clostridia;o__Oscillospirales;f__Ruminococcaceae;g__Faecalibacterium;s__	26	1	0.000148
GUT_GENOME017247|NODE_187_length_63871_cov_28.525|1|5	SRR11565167|k141_124505_flag=1_multi=11.0000_len=1677	Kitrinoviricota	GUT_GENOME247791	d__Bacteria;p__Firmicutes_A;c__Clostridia;o__Oscillospirales;f__Ruminococcaceae;g__Faecalibacterium;s__	26	0	3.18e-06
GUT_GENOME017247|NODE_187_length_63871_cov_28.525|1|5	SRR11565167|k141_124505_flag=1_multi=11.0000_len=1677	Kitrinoviricota	GUT_GENOME247791	d__Bacteria;p__Firmicutes_A;c__Clostridia;o__Oscillospirales;f__Ruminococcaceae;g__Faecalibacterium;s__	26	0	3.18e-06
GUT_GENOME017247|NODE_187_length_63871_cov_28.525|1|5	SRR11649087|k141_62756_flag=1_multi=5.9805_len=5783	Pisuviricota	GUT_GENOME247791	d__Bacteria;p__Firmicutes_A;c__Clostridia;o__Oscillospirales;f__Ruminococcaceae;g__Faecalibacterium;s__	26	1	0.000148
GUT_GENOME017247|NODE_187_length_63871_cov_28.525|1|5	SRR11565167|k141_124505_flag=1_multi=11.0000_len=1677	Kitrinoviricota	GUT_GENOME247791	d__Bacteria;p__Firmicutes_A;c__Clostridia;o__Oscillospirales;f__Ruminococcaceae;g__Faecalibacterium;s__	26	0	3.18e-06
GUT_GENOME017247|NODE_187_length_63871_cov_28.525|1|5	SRR17509970|k141_1110097_flag=1_multi=29.0000_len=2075	Pisuviricota	GUT_GENOME247791	d__Bacteria;p__Firmicutes_A;c__Clostridia;o__Oscillospirales;f__Ruminococcaceae;g__Faecalibacterium;s__	25	1	0.000532
GUT_GENOME017247|NODE_187_length_63871_cov_28.525|1|5	SRR17509970|k141_1110097_flag=1_multi=29.0000_len=2075	Pisuviricota	GUT_GENOME247791	d__Bacteria;p__Firmicutes_A;c__Clostridia;o__Oscillospirales;f__Ruminococcaceae;g__Faecalibacterium;s__	25	1	0.000532
GUT_GENOME017247|NODE_187_length_63871_cov_28.525|1|5	SRR11649087|k141_62756_flag=1_multi=5.9805_len=5783	Pisuviricota	GUT_GENOME247791	d__Bacteria;p__Firmicutes_A;c__Clostridia;o__Oscillospirales;f__Ruminococcaceae;g__Faecalibacterium;s__	26	1	0.000148
GUT_GENOME018618|NODE_1105_length_17630_cov_12.3855|1|36	SRR17481247|k141_96314_flag=1_multi=15.0000_len=14871	Negarnaviricota	GUT_GENOME140342	d__Bacteria;p__Firmicutes_A;c__Clostridia;o__Oscillospirales;f__Acutalibacteraceae;g__Ruminococcus_E;s__	28	0	0.000144
GUT_GENOME018623|NODE_581_length_26226_cov_8.57571|1|4	SRR11829512|k141_28587_flag=1_multi=57.0000_len=2592	Lenarviricota	GUT_GENOME095997	d__Bacteria;p__Firmicutes_A;c__Clostridia;o__Lachnospirales;f__Lachnospiraceae;g__Butyrivibrio_A;s__Butyrivibrio_A crossotus	26	0	0.001
GUT_GENOME018939|NODE_1201_length_17950_cov_19.0607|1|1	SRR11622682|k141_810416_flag=1_multi=8.0000_len=7563	Kitrinoviricota	GUT_GENOME232472	d__Bacteria;p__Firmicutes;c__Bacilli;o__RFN20;f__CAG-288;g__CAG-568;s__CAG-568 sp000434395	23	0	0.000296
GUT_GENOME019004|NODE_563_length_31273_cov_12.971|1|20	SRR17497114|k141_81471_flag=1_multi=38.0000_len=2188	Lenarviricota	GUT_GENOME000448	d__Bacteria;p__Firmicutes_A;c__Clostridia;o__Oscillospirales;f__Ruminococcaceae;g__CAG-353;s__CAG-353 sp900066885	25	0	2.86e-05
GUT_GENOME019004|NODE_563_length_31273_cov_12.971|1|20	SRR17497118|k141_54656_flag=1_multi=102.0000_len=2282	Lenarviricota	GUT_GENOME000448	d__Bacteria;p__Firmicutes_A;c__Clostridia;o__Oscillospirales;f__Ruminococcaceae;g__CAG-353;s__CAG-353 sp900066885	25	0	2.86e-05
GUT_GENOME020123|NODE_2026_length_16582_cov_6.19247|1|6	SRR7532745|k141_67301_flag=1_multi=7.0000_len=5564	Kitrinoviricota	GUT_GENOME245758	d__Bacteria;p__Firmicutes_A;c__Clostridia;o__Oscillospirales;f__Ruminococcaceae;g__Ruminiclostridium_E;s__	23	0	0.00037
GUT_GENOME020177|NODE_1696_length_16582_cov_4.87554|1|6	SRR7532745|k141_67301_flag=1_multi=7.0000_len=5564	Kitrinoviricota	GUT_GENOME245758	d__Bacteria;p__Firmicutes_A;c__Clostridia;o__Oscillospirales;f__Ruminococcaceae;g__Ruminiclostridium_E;s__	23	0	0.00037
GUT_GENOME021986|NODE_70_length_181491_cov_7.20672|1|81	SRR17497126|k141_66057_flag=1_multi=12.6293_len=2275	Kitrinoviricota	GUT_GENOME000448	d__Bacteria;p__Firmicutes_A;c__Clostridia;o__Oscillospirales;f__Ruminococcaceae;g__CAG-353;s__CAG-353 sp900066885	23	0	0.000481
GUT_GENOME022509|NODE_94_length_113006_cov_41.4993|5|9	SRR11450586|k141_68023_flag=1_multi=9.0000_len=2058	Pisuviricota	GUT_GENOME017944	d__Bacteria;p__Bacteroidota;c__Bacteroidia;o__Bacteroidales;f__UBA932;g__RC9;s__	28	1	2.86e-05
GUT_GENOME022566|NODE_90_length_112880_cov_18.0908|8|9	SRR11450586|k141_68023_flag=1_multi=9.0000_len=2058	Pisuviricota	GUT_GENOME017944	d__Bacteria;p__Bacteroidota;c__Bacteroidia;o__Bacteroidales;f__UBA932;g__RC9;s__	28	1	2.86e-05
GUT_GENOME022883|NODE_97_length_127316_cov_19.451|4|8	SRR7004416|k141_89705_flag=1_multi=51.0000_len=5521	Duplornaviricota	GUT_GENOME024514	d__Bacteria;p__Bacteroidota;c__Bacteroidia;o__Bacteroidales;f__Bacteroidaceae;g__UBA4372;s__	27	1	7.2e-05
GUT_GENOME023115|NODE_510_length_69160_cov_11.4483|6|121	SRR7536466|k141_87659_flag=1_multi=7.0000_len=3118	Kitrinoviricota	GUT_GENOME014725	d__Bacteria;p__Firmicutes_A;c__Clostridia;o__Christensenellales;f__CAG-138;g__PeH17;s__PeH17 sp000435055	27	1	0.000103
GUT_GENOME023509|NODE_72_length_127188_cov_32.5271|1|6	SRR11828805|k141_73618_flag=1_multi=13.0000_len=4889	Pisuviricota	GUT_GENOME095997	d__Bacteria;p__Firmicutes_A;c__Clostridia;o__Lachnospirales;f__Lachnospiraceae;g__Butyrivibrio_A;s__Butyrivibrio_A crossotus	23	0	0.000296
GUT_GENOME023522|NODE_177_length_82237_cov_4.87732|1|6	SRR5829932|k141_19237_flag=1_multi=4.0000_len=1820	Negarnaviricota	GUT_GENOME018576	d__Bacteria;p__Bacteroidota;c__Bacteroidia;o__Bacteroidales;f__UBA932;g__RC9;s__RC9 sp000433355	28	0	0.000123
GUT_GENOME023903|NODE_1363_length_20503_cov_19.5147|2|31	SRR11678561|k141_249432_flag=1_multi=3.0000_len=1544	Lenarviricota	GUT_GENOME022350	d__Bacteria;p__Firmicutes_C;c__Negativicutes;o__Veillonellales;f__Dialisteraceae;g__Dialister;s__Dialister sp002320515	23	0	0.000407
GUT_GENOME023903|NODE_1363_length_20503_cov_19.5147|3|22	SRR11678561|k141_249432_flag=1_multi=3.0000_len=1544	Lenarviricota	GUT_GENOME022350	d__Bacteria;p__Firmicutes_C;c__Negativicutes;o__Veillonellales;f__Dialisteraceae;g__Dialister;s__Dialister sp002320515	23	0	0.000407
GUT_GENOME025275|NODE_273_length_75416_cov_9.91822|1|14	SRR11450585|k141_341492_flag=1_multi=25.0000_len=6112	Pisuviricota	GUT_GENOME239728	d__Bacteria;p__Firmicutes_A;c__Clostridia;o__Lachnospirales;f__Lachnospiraceae;g__Agathobacter;s__Agathobacter faecis	35	1	6.61e-09
GUT_GENOME025275|NODE_273_length_75416_cov_9.91822|1|14	SRR11647985|k141_31767_flag=1_multi=10.0000_len=5731	Pisuviricota	GUT_GENOME239728	d__Bacteria;p__Firmicutes_A;c__Clostridia;o__Lachnospirales;f__Lachnospiraceae;g__Agathobacter;s__Agathobacter faecis	32	1	3.08e-07
GUT_GENOME025339|NODE_276_length_75284_cov_7.23075|1|14	SRR11647985|k141_31767_flag=1_multi=10.0000_len=5731	Pisuviricota	GUT_GENOME239728	d__Bacteria;p__Firmicutes_A;c__Clostridia;o__Lachnospirales;f__Lachnospiraceae;g__Agathobacter;s__Agathobacter faecis	32	1	3.08e-07
GUT_GENOME025339|NODE_276_length_75284_cov_7.23075|1|14	SRR11450585|k141_341492_flag=1_multi=25.0000_len=6112	Pisuviricota	GUT_GENOME239728	d__Bacteria;p__Firmicutes_A;c__Clostridia;o__Lachnospirales;f__Lachnospiraceae;g__Agathobacter;s__Agathobacter faecis	35	1	6.61e-09
GUT_GENOME027324|NODE_554_length_11944_cov_18.6546|1|11	SRR17497105|k141_32486_flag=1_multi=58.0000_len=3949	Lenarviricota	GUT_GENOME207897	d__Bacteria;p__Firmicutes_A;c__Clostridia;o__Tissierellales;f__Helcococcaceae;g__Finegoldia;s__Finegoldia magna	23	0	0.000481
GUT_GENOME028261|NODE_27_length_80441_cov_34.5737|1|8	SRR11450585|k141_74928_flag=1_multi=31.0000_len=8533	Pisuviricota	GUT_GENOME140299	d__Bacteria;p__Bacteroidota;c__Bacteroidia;o__Bacteroidales;f__Bacteroidaceae;g__Prevotella;s__Prevotella copri	28	1	2e-05
GUT_GENOME028267|NODE_33_length_68819_cov_39.546943|1|8	SRR11450585|k141_74928_flag=1_multi=31.0000_len=8533	Pisuviricota	GUT_GENOME140299	d__Bacteria;p__Bacteroidota;c__Bacteroidia;o__Bacteroidales;f__Bacteroidaceae;g__Prevotella;s__Prevotella copri	28	1	2e-05
GUT_GENOME028273|NODE_34_length_71451_cov_42.016906|1|8	SRR11450585|k141_74928_flag=1_multi=31.0000_len=8533	Pisuviricota	GUT_GENOME140299	d__Bacteria;p__Bacteroidota;c__Bacteroidia;o__Bacteroidales;f__Bacteroidaceae;g__Prevotella;s__Prevotella copri	28	1	2e-05
GUT_GENOME028285|NODE_35_length_73760_cov_39.728241|1|8	SRR11450585|k141_74928_flag=1_multi=31.0000_len=8533	Pisuviricota	GUT_GENOME140299	d__Bacteria;p__Bacteroidota;c__Bacteroidia;o__Bacteroidales;f__Bacteroidaceae;g__Prevotella;s__Prevotella copri	28	1	2e-05
GUT_GENOME029976|NODE_62_length_80270_cov_7.898473|1|6	SRR11564271|k141_243949_flag=1_multi=15.0000_len=3432	Pisuviricota	GUT_GENOME000308	d__Bacteria;p__Firmicutes_A;c__Clostridia;o__Lachnospirales;f__Lachnospiraceae;g__Lachnospira;s__Lachnospira rogosae	23	0	0.000629
GUT_GENOME032291|NODE_513_length_49689_cov_4.614921|2|2	SRR11828806|k141_170737_flag=0_multi=1.0000_len=1011	Lenarviricota	GUT_GENOME147149	d__Bacteria;p__Firmicutes_A;c__Clostridia;o__Lachnospirales;f__Lachnospiraceae;g__Anaerostipes;s__Anaerostipes hadrus	27	0	0.000555
GUT_GENOME033688|NODE_620_length_37828_cov_16.450719|1|24	SRR11678313|k141_145520_flag=1_multi=64.0000_len=7067	Kitrinoviricota	GUT_GENOME251083	d__Bacteria;p__Firmicutes_A;c__Clostridia;o__Oscillospirales;f__Ruminococcaceae;g__Gemmiger;s__Gemmiger sp003476825	26	1	0.00037
GUT_GENOME033698|NODE_3157_length_12264_cov_4.059382|1|3	SRR11828902|k141_96244_flag=1_multi=16.0000_len=4083	Lenarviricota	GUT_GENOME251083	d__Bacteria;p__Firmicutes_A;c__Clostridia;o__Oscillospirales;f__Ruminococcaceae;g__Gemmiger;s__Gemmiger sp003476825	30	1	0.000592
GUT_GENOME036198|NODE_21_length_183604_cov_50.126402|1|41	SRR11564270|k141_59032_flag=1_multi=7.0000_len=3355	Kitrinoviricota	GUT_GENOME001029	d__Bacteria;p__Firmicutes_A;c__Clostridia;o__Lachnospirales;f__Lachnospiraceae;g__CAG-127;s__CAG-127 sp900319515	23	0	0.000481
GUT_GENOME037096|NODE_563_length_33076_cov_11.050695|2|31	SRR8549889|k141_64238_flag=1_multi=9.0000_len=4750	Pisuviricota	GUT_GENOME143505	d__Bacteria;p__Bacteroidota;c__Bacteroidia;o__Bacteroidales;f__Bacteroidaceae;g__Bacteroides_B;s__Bacteroides_B dorei	26	1	0.000296
GUT_GENOME037120|NODE_28_length_166625_cov_11.752164|2|44	SRR11564270|k141_59032_flag=1_multi=7.0000_len=3355	Kitrinoviricota	GUT_GENOME001029	d__Bacteria;p__Firmicutes_A;c__Clostridia;o__Lachnospirales;f__Lachnospiraceae;g__CAG-127;s__CAG-127 sp900319515	23	0	0.000481
GUT_GENOME037222|NODE_362_length_39347_cov_4.448310|1|14	SRR8420479|k141_18149_flag=1_multi=12.0000_len=3006	Kitrinoviricota	GUT_GENOME142483	d__Bacteria;p__Firmicutes;c__Bacilli;o__Lactobacillales;f__Lactobacillaceae;g__Lactobacillus_C;s__Lactobacillus_C paracasei	27	1	8.23e-05
GUT_GENOME038237|NODE_239_length_59365_cov_4.467392|2|2	SRR11828806|k141_170737_flag=0_multi=1.0000_len=1011	Lenarviricota	GUT_GENOME147149	d__Bacteria;p__Firmicutes_A;c__Clostridia;o__Lachnospirales;f__Lachnospiraceae;g__Anaerostipes;s__Anaerostipes hadrus	27	0	0.000555
GUT_GENOME038261|NODE_260_length_58080_cov_11.905661|1|44	SRR7534934|k141_83609_flag=1_multi=8.0000_len=5816	Pisuviricota	GUT_GENOME143505	d__Bacteria;p__Bacteroidota;c__Bacteroidia;o__Bacteroidales;f__Bacteroidaceae;g__Bacteroides_B;s__Bacteroides_B dorei	23	0	0.00037
GUT_GENOME038290|NODE_1369_length_16953_cov_11.361640|1|25	SRR7534934|k141_83609_flag=1_multi=8.0000_len=5816	Pisuviricota	GUT_GENOME143505	d__Bacteria;p__Bacteroidota;c__Bacteroidia;o__Bacteroidales;f__Bacteroidaceae;g__Bacteroides_B;s__Bacteroides_B dorei	23	0	0.00037
GUT_GENOME038564|NODE_22_length_149611_cov_6.433122|3|10	SRR11076227|k141_756265_flag=1_multi=8.0000_len=5195	Kitrinoviricota	GUT_GENOME140786	d__Bacteria;p__Firmicutes_A;c__Clostridia;o__Oscillospirales;f__Ruminococcaceae;g__Ruminococcus_D;s__Ruminococcus_D bicirculans	26	1	0.00037
GUT_GENOME038578|NODE_12_length_198251_cov_6.534799|2|25	SRR11076227|k141_756265_flag=1_multi=8.0000_len=5195	Kitrinoviricota	GUT_GENOME140786	d__Bacteria;p__Firmicutes_A;c__Clostridia;o__Oscillospirales;f__Ruminococcaceae;g__Ruminococcus_D;s__Ruminococcus_D bicirculans	26	1	0.00037
GUT_GENOME038585|NODE_14_length_198251_cov_6.475837|2|25	SRR11076227|k141_756265_flag=1_multi=8.0000_len=5195	Kitrinoviricota	GUT_GENOME140786	d__Bacteria;p__Firmicutes_A;c__Clostridia;o__Oscillospirales;f__Ruminococcaceae;g__Ruminococcus_D;s__Ruminococcus_D bicirculans	26	1	0.00037
GUT_GENOME044188|NODE_42_length_155666_cov_9.379170|2|16	BC-0345649851|k141_51703	Kitrinoviricota	GUT_GENOME143211	d__Bacteria;p__Verrucomicrobiota;c__Verrucomicrobiae;o__Verrucomicrobiales;f__Akkermansiaceae;g__Akkermansia;s__Akkermansia muciniphila	26	1	0.000407
GUT_GENOME044188|NODE_42_length_155666_cov_9.379170|2|16	BC-0345649851|k141_51703	Kitrinoviricota	GUT_GENOME143211	d__Bacteria;p__Verrucomicrobiota;c__Verrucomicrobiae;o__Verrucomicrobiales;f__Akkermansiaceae;g__Akkermansia;s__Akkermansia muciniphila	26	1	0.000407
GUT_GENOME044188|NODE_42_length_155666_cov_9.379170|2|16	SRR7540366|k141_284741_flag=1_multi=13.0000_len=1729	Kitrinoviricota	GUT_GENOME143211	d__Bacteria;p__Verrucomicrobiota;c__Verrucomicrobiae;o__Verrucomicrobiales;f__Akkermansiaceae;g__Akkermansia;s__Akkermansia muciniphila	26	0	8.75e-06
GUT_GENOME044188|NODE_42_length_155666_cov_9.379170|2|16	SRR7540366|k141_284741_flag=1_multi=13.0000_len=1729	Kitrinoviricota	GUT_GENOME143211	d__Bacteria;p__Verrucomicrobiota;c__Verrucomicrobiae;o__Verrucomicrobiales;f__Akkermansiaceae;g__Akkermansia;s__Akkermansia muciniphila	26	0	8.75e-06
GUT_GENOME045211|NODE_2040_length_11634_cov_6.790224|1|14	SRR8554513|k141_40423_flag=1_multi=11.0000_len=6432	Pisuviricota	GUT_GENOME096178	d__Bacteria;p__Firmicutes_A;c__Clostridia;o__Lachnospirales;f__Lachnospiraceae;g__Clostridium_Q;s__Clostridium_Q symbiosum	26	1	0.000407
GUT_GENOME045810|NODE_3142_length_9889_cov_3.055623|1|7	SRR11828806|k141_193153_flag=1_multi=23.6586_len=9018	Pisuviricota	GUT_GENOME143602	d__Bacteria;p__Fusobacteriota;c__Fusobacteriia;o__Fusobacteriales;f__Fusobacteriaceae;g__Fusobacterium_A;s__Fusobacterium_A mortiferum	26	1	0.00074
GUT_GENOME045907|NODE_343_length_58836_cov_9.363893|2|18	SRR11565436|k141_85089_flag=1_multi=23.0000_len=7591	Pisuviricota	GUT_GENOME000245	d__Bacteria;p__Firmicutes_A;c__Clostridia;o__Peptostreptococcales;f__Peptostreptococcaceae;g__Intestinibacter;s__Intestinibacter bartlettii	23	0	0.000481
GUT_GENOME046201|NODE_69_length_137010_cov_14.001008|2|10	BC-0302411580|k141_4922	Lenarviricota	GUT_GENOME143602	d__Bacteria;p__Fusobacteriota;c__Fusobacteriia;o__Fusobacteriales;f__Fusobacteriaceae;g__Fusobacterium_A;s__Fusobacterium_A mortiferum	24	0	0.000123
GUT_GENOME046222|NODE_23_length_137010_cov_13.382082|3|1	BC-0302411580|k141_4922	Lenarviricota	GUT_GENOME143602	d__Bacteria;p__Fusobacteriota;c__Fusobacteriia;o__Fusobacteriales;f__Fusobacteriaceae;g__Fusobacterium_A;s__Fusobacterium_A mortiferum	24	0	0.000123
GUT_GENOME046258|NODE_590_length_50154_cov_88.296174|1|8	SRR13696271|k141_83256_flag=1_multi=10.0000_len=2611	Pisuviricota	GUT_GENOME239663	d__Bacteria;p__Firmicutes_A;c__Clostridia;o__Oscillospirales;f__Ruminococcaceae;g__Ruthenibacterium;s__Ruthenibacterium lactatiformans	26	1	0.000296
GUT_GENOME046278|NODE_1053_length_20610_cov_3.243153|1|8	SRR13696271|k141_83256_flag=1_multi=10.0000_len=2611	Pisuviricota	GUT_GENOME239663	d__Bacteria;p__Firmicutes_A;c__Clostridia;o__Oscillospirales;f__Ruminococcaceae;g__Ruthenibacterium;s__Ruthenibacterium lactatiformans	26	1	0.000296
GUT_GENOME046464|NODE_466_length_40016_cov_40.679863|1|13	SRR11678313|k141_145520_flag=1_multi=64.0000_len=7067	Kitrinoviricota	GUT_GENOME251083	d__Bacteria;p__Firmicutes_A;c__Clostridia;o__Oscillospirales;f__Ruminococcaceae;g__Gemmiger;s__Gemmiger sp003476825	26	1	0.00037
GUT_GENOME046663|NODE_1_length_427017_cov_41.520142|1|12	SRR18776295|k141_583926_flag=1_multi=24.0000_len=4757	Pisuviricota	GUT_GENOME000308	d__Bacteria;p__Firmicutes_A;c__Clostridia;o__Lachnospirales;f__Lachnospiraceae;g__Lachnospira;s__Lachnospira rogosae	30	1	0.000481
GUT_GENOME047519|NODE_171_length_41672_cov_12.778600|1|8	SRR11450580|k141_255737_flag=1_multi=34.0000_len=5100	Pisuviricota	GUT_GENOME147149	d__Bacteria;p__Firmicutes_A;c__Clostridia;o__Lachnospirales;f__Lachnospiraceae;g__Anaerostipes;s__Anaerostipes hadrus	34	0	0.000444
GUT_GENOME047519|NODE_171_length_41672_cov_12.778600|1|8	SRR14530886|k119_1352_flag=1_multi=31.0000_len=4187	Kitrinoviricota	GUT_GENOME147149	d__Bacteria;p__Firmicutes_A;c__Clostridia;o__Lachnospirales;f__Lachnospiraceae;g__Anaerostipes;s__Anaerostipes hadrus	27	1	0.000123
GUT_GENOME049402|NODE_919_length_54996_cov_13.537213|3|8	SRR11828805|k141_73618_flag=1_multi=13.0000_len=4889	Pisuviricota	GUT_GENOME143505	d__Bacteria;p__Bacteroidota;c__Bacteroidia;o__Bacteroidales;f__Bacteroidaceae;g__Bacteroides_B;s__Bacteroides_B dorei	23	0	0.000629
GUT_GENOME049559|NODE_417_length_68601_cov_18.104353|1|1	SRR5829904|k141_24749_flag=1_multi=8.0000_len=3809	Kitrinoviricota	GUT_GENOME000295	d__Bacteria;p__Firmicutes_A;c__Clostridia;o__Lachnospirales;f__Lachnospiraceae;g__Roseburia;s__Roseburia intestinalis	32	1	6e-05
GUT_GENOME050246|NODE_280_length_18062_cov_27.897873|1|8	SRR11450585|k141_74928_flag=1_multi=31.0000_len=8533	Pisuviricota	GUT_GENOME140299	d__Bacteria;p__Bacteroidota;c__Bacteroidia;o__Bacteroidales;f__Bacteroidaceae;g__Prevotella;s__Prevotella copri	28	1	2e-05
GUT_GENOME050253|NODE_21_length_80438_cov_33.011308|1|8	SRR11450585|k141_74928_flag=1_multi=31.0000_len=8533	Pisuviricota	GUT_GENOME140299	d__Bacteria;p__Bacteroidota;c__Bacteroidia;o__Bacteroidales;f__Bacteroidaceae;g__Prevotella;s__Prevotella copri	28	1	2e-05
GUT_GENOME050257|NODE_334_length_18048_cov_31.016284|1|8	SRR11450585|k141_74928_flag=1_multi=31.0000_len=8533	Pisuviricota	GUT_GENOME140299	d__Bacteria;p__Bacteroidota;c__Bacteroidia;o__Bacteroidales;f__Bacteroidaceae;g__Prevotella;s__Prevotella copri	28	1	2e-05
GUT_GENOME053166|NODE_21_length_114167_cov_15.975349|1|10	SRR11450585|k141_341492_flag=1_multi=25.0000_len=6112	Pisuviricota	GUT_GENOME239728	d__Bacteria;p__Firmicutes_A;c__Clostridia;o__Lachnospirales;f__Lachnospiraceae;g__Agathobacter;s__Agathobacter faecis	35	1	6.61e-09
GUT_GENOME053166|NODE_21_length_114167_cov_15.975349|1|10	SRR11647985|k141_31767_flag=1_multi=10.0000_len=5731	Pisuviricota	GUT_GENOME239728	d__Bacteria;p__Firmicutes_A;c__Clostridia;o__Lachnospirales;f__Lachnospiraceae;g__Agathobacter;s__Agathobacter faecis	32	1	3.08e-07
GUT_GENOME053181|NODE_15_length_116040_cov_18.212872|1|5	SRR11647985|k141_31767_flag=1_multi=10.0000_len=5731	Pisuviricota	GUT_GENOME239728	d__Bacteria;p__Firmicutes_A;c__Clostridia;o__Lachnospirales;f__Lachnospiraceae;g__Agathobacter;s__Agathobacter faecis	32	1	3.08e-07
GUT_GENOME053181|NODE_15_length_116040_cov_18.212872|1|5	SRR11450585|k141_341492_flag=1_multi=25.0000_len=6112	Pisuviricota	GUT_GENOME239728	d__Bacteria;p__Firmicutes_A;c__Clostridia;o__Lachnospirales;f__Lachnospiraceae;g__Agathobacter;s__Agathobacter faecis	35	1	6.61e-09
GUT_GENOME053205|NODE_24_length_127367_cov_7.540538|1|1	SRR17509931|k141_86152_flag=1_multi=34.0000_len=1407	Pisuviricota	GUT_GENOME268399	d__Bacteria;p__Firmicutes_C;c__Negativicutes;o__Acidaminococcales;f__Acidaminococcaceae;g__Phascolarctobacterium;s__Phascolarctobacterium sp000436095	26	1	0.000407
GUT_GENOME053224|NODE_6_length_256165_cov_7.718957|2|35	SRR17509931|k141_86152_flag=1_multi=34.0000_len=1407	Pisuviricota	GUT_GENOME268399	d__Bacteria;p__Firmicutes_C;c__Negativicutes;o__Acidaminococcales;f__Acidaminococcaceae;g__Phascolarctobacterium;s__Phascolarctobacterium sp000436095	26	1	0.000407
GUT_GENOME053560|NODE_27_length_80441_cov_34.5723|1|8	SRR11450585|k141_74928_flag=1_multi=31.0000_len=8533	Pisuviricota	GUT_GENOME140299	d__Bacteria;p__Bacteroidota;c__Bacteroidia;o__Bacteroidales;f__Bacteroidaceae;g__Prevotella;s__Prevotella copri	28	1	2e-05
GUT_GENOME053560|NODE_27_length_80441_cov_34.5723|2|3	SRR11450585|k141_74928_flag=1_multi=31.0000_len=8533	Pisuviricota	GUT_GENOME140299	d__Bacteria;p__Bacteroidota;c__Bacteroidia;o__Bacteroidales;f__Bacteroidaceae;g__Prevotella;s__Prevotella copri	28	1	2e-05
GUT_GENOME053567|NODE_34_length_68819_cov_39.543758|1|8	SRR11450585|k141_74928_flag=1_multi=31.0000_len=8533	Pisuviricota	GUT_GENOME140299	d__Bacteria;p__Bacteroidota;c__Bacteroidia;o__Bacteroidales;f__Bacteroidaceae;g__Prevotella;s__Prevotella copri	28	1	2e-05
GUT_GENOME053577|NODE_36_length_71451_cov_42.016752|1|8	SRR11450585|k141_74928_flag=1_multi=31.0000_len=8533	Pisuviricota	GUT_GENOME140299	d__Bacteria;p__Bacteroidota;c__Bacteroidia;o__Bacteroidales;f__Bacteroidaceae;g__Prevotella;s__Prevotella copri	28	1	2e-05
GUT_GENOME053584|NODE_35_length_73760_cov_39.726762|1|8	SRR11450585|k141_74928_flag=1_multi=31.0000_len=8533	Pisuviricota	GUT_GENOME140299	d__Bacteria;p__Bacteroidota;c__Bacteroidia;o__Bacteroidales;f__Bacteroidaceae;g__Prevotella;s__Prevotella copri	28	1	2e-05
GUT_GENOME055990|NODE_3647_length_9763_cov_3.796457|1|5	SRR7004411|k141_34227_flag=1_multi=14.0000_len=5878	Kitrinoviricota	GUT_GENOME093688	d__Bacteria;p__Firmicutes_A;c__Clostridia;o__Oscillospirales;f__Oscillospiraceae;g__CAG-110;s__	27	0	0.000444
GUT_GENOME056535|NODE_1616_length_17770_cov_23.231499|1|20	SRR11565167|k141_124505_flag=1_multi=11.0000_len=1677	Kitrinoviricota	GUT_GENOME143505	d__Bacteria;p__Bacteroidota;c__Bacteroidia;o__Bacteroidales;f__Bacteroidaceae;g__Bacteroides_B;s__Bacteroides_B dorei	32	1	1.71e-07
GUT_GENOME056535|NODE_1616_length_17770_cov_23.231499|1|20	SRR11829332|k141_140645_flag=1_multi=5.0000_len=2837	Pisuviricota	GUT_GENOME143505	d__Bacteria;p__Bacteroidota;c__Bacteroidia;o__Bacteroidales;f__Bacteroidaceae;g__Bacteroides_B;s__Bacteroides_B dorei	24	0	0.000103
GUT_GENOME056535|NODE_1616_length_17770_cov_23.231499|1|20	SRR11829332|k141_140645_flag=1_multi=5.0000_len=2837	Pisuviricota	GUT_GENOME143505	d__Bacteria;p__Bacteroidota;c__Bacteroidia;o__Bacteroidales;f__Bacteroidaceae;g__Bacteroides_B;s__Bacteroides_B dorei	24	0	0.000103
GUT_GENOME056535|NODE_1616_length_17770_cov_23.231499|1|20	SRR11829332|k141_140645_flag=1_multi=5.0000_len=2837	Pisuviricota	GUT_GENOME143505	d__Bacteria;p__Bacteroidota;c__Bacteroidia;o__Bacteroidales;f__Bacteroidaceae;g__Bacteroides_B;s__Bacteroides_B dorei	24	0	0.000103
GUT_GENOME056535|NODE_1616_length_17770_cov_23.231499|1|20	SRR17509970|k141_1110097_flag=1_multi=29.0000_len=2075	Pisuviricota	GUT_GENOME143505	d__Bacteria;p__Bacteroidota;c__Bacteroidia;o__Bacteroidales;f__Bacteroidaceae;g__Bacteroides_B;s__Bacteroides_B dorei	26	1	0.00037
GUT_GENOME056535|NODE_1616_length_17770_cov_23.231499|1|20	SRR11829332|k141_140645_flag=1_multi=5.0000_len=2837	Pisuviricota	GUT_GENOME143505	d__Bacteria;p__Bacteroidota;c__Bacteroidia;o__Bacteroidales;f__Bacteroidaceae;g__Bacteroides_B;s__Bacteroides_B dorei	24	0	0.000103
GUT_GENOME056535|NODE_1616_length_17770_cov_23.231499|1|20	SRR11565167|k141_124505_flag=1_multi=11.0000_len=1677	Kitrinoviricota	GUT_GENOME143505	d__Bacteria;p__Bacteroidota;c__Bacteroidia;o__Bacteroidales;f__Bacteroidaceae;g__Bacteroides_B;s__Bacteroides_B dorei	32	1	1.71e-07
GUT_GENOME056535|NODE_1616_length_17770_cov_23.231499|1|20	SRR11649087|k141_62756_flag=1_multi=5.9805_len=5783	Pisuviricota	GUT_GENOME143505	d__Bacteria;p__Bacteroidota;c__Bacteroidia;o__Bacteroidales;f__Bacteroidaceae;g__Bacteroides_B;s__Bacteroides_B dorei	33	2	2.21e-06
GUT_GENOME056535|NODE_1616_length_17770_cov_23.231499|1|20	SRR11829332|k141_140645_flag=1_multi=5.0000_len=2837	Pisuviricota	GUT_GENOME143505	d__Bacteria;p__Bacteroidota;c__Bacteroidia;o__Bacteroidales;f__Bacteroidaceae;g__Bacteroides_B;s__Bacteroides_B dorei	24	0	0.000103
GUT_GENOME056535|NODE_1616_length_17770_cov_23.231499|1|20	SRR17509970|k141_1110097_flag=1_multi=29.0000_len=2075	Pisuviricota	GUT_GENOME143505	d__Bacteria;p__Bacteroidota;c__Bacteroidia;o__Bacteroidales;f__Bacteroidaceae;g__Bacteroides_B;s__Bacteroides_B dorei	26	1	0.00037
GUT_GENOME056535|NODE_1616_length_17770_cov_23.231499|1|20	SRR11565167|k141_124505_flag=1_multi=11.0000_len=1677	Kitrinoviricota	GUT_GENOME143505	d__Bacteria;p__Bacteroidota;c__Bacteroidia;o__Bacteroidales;f__Bacteroidaceae;g__Bacteroides_B;s__Bacteroides_B dorei	32	1	1.71e-07
GUT_GENOME056535|NODE_1616_length_17770_cov_23.231499|1|20	SRR11649087|k141_62756_flag=1_multi=5.9805_len=5783	Pisuviricota	GUT_GENOME143505	d__Bacteria;p__Bacteroidota;c__Bacteroidia;o__Bacteroidales;f__Bacteroidaceae;g__Bacteroides_B;s__Bacteroides_B dorei	33	2	2.21e-06
GUT_GENOME056535|NODE_1616_length_17770_cov_23.231499|1|20	SRR11829332|k141_140645_flag=1_multi=5.0000_len=2837	Pisuviricota	GUT_GENOME143505	d__Bacteria;p__Bacteroidota;c__Bacteroidia;o__Bacteroidales;f__Bacteroidaceae;g__Bacteroides_B;s__Bacteroides_B dorei	24	0	0.000103
GUT_GENOME056535|NODE_1616_length_17770_cov_23.231499|1|20	SRR11649087|k141_62756_flag=1_multi=5.9805_len=5783	Pisuviricota	GUT_GENOME143505	d__Bacteria;p__Bacteroidota;c__Bacteroidia;o__Bacteroidales;f__Bacteroidaceae;g__Bacteroides_B;s__Bacteroides_B dorei	33	2	2.21e-06
GUT_GENOME056783|NODE_2217_length_15648_cov_5.161290|1|14	SRR7004411|k141_34227_flag=1_multi=14.0000_len=5878	Kitrinoviricota	GUT_GENOME093688	d__Bacteria;p__Firmicutes_A;c__Clostridia;o__Oscillospirales;f__Oscillospiraceae;g__CAG-110;s__	27	0	0.000444
GUT_GENOME057518|NODE_504_length_28126_cov_5.51573|1|5	SRR12610551|k141_30448_flag=1_multi=4.0000_len=1282	Pisuviricota	GUT_GENOME001354	d__Bacteria;p__Proteobacteria;c__Gammaproteobacteria;o__Burkholderiales;f__Burkholderiaceae;g__Duodenibacillus;s__	26	1	0.00037
GUT_GENOME057518|NODE_504_length_28126_cov_5.51573|1|5	SRR12334072|k141_154640_flag=1_multi=8.1430_len=1672	Pisuviricota	GUT_GENOME001354	d__Bacteria;p__Proteobacteria;c__Gammaproteobacteria;o__Burkholderiales;f__Burkholderiaceae;g__Duodenibacillus;s__	26	1	0.00037
GUT_GENOME058305|NODE_369_length_45140_cov_11.398558|1|40	SRR11828902|k141_257551_flag=1_multi=5.0000_len=1485	Lenarviricota	GUT_GENOME140240	d__Bacteria;p__Bacteroidota;c__Bacteroidia;o__Bacteroidales;f__Bacteroidaceae;g__Bacteroides;s__Bacteroides faecis	26	1	0.001
GUT_GENOME058305|NODE_369_length_45140_cov_11.398558|1|40	SRR11829103|k141_190435_flag=1_multi=15.0000_len=2231	Lenarviricota	GUT_GENOME140240	d__Bacteria;p__Bacteroidota;c__Bacteroidia;o__Bacteroidales;f__Bacteroidaceae;g__Bacteroides;s__Bacteroides faecis	26	1	0.001
GUT_GENOME058528|NODE_885_length_16204_cov_12.3796|3|16	SRR12685203|k141_82908_flag=1_multi=12.0000_len=5867	Pisuviricota	GUT_GENOME096257	d__Bacteria;p__Firmicutes;c__Bacilli;o__Erysipelotrichales;f__Erysipelatoclostridiaceae;g__Erysipelatoclostridium;s__Erysipelatoclostridium ramosum	29	0	5.72e-05
GUT_GENOME058528|NODE_885_length_16204_cov_12.3796|3|16	SRR11829101|k141_277256_flag=1_multi=41.0000_len=9283	Pisuviricota	GUT_GENOME096257	d__Bacteria;p__Firmicutes;c__Bacilli;o__Erysipelotrichales;f__Erysipelatoclostridiaceae;g__Erysipelatoclostridium;s__Erysipelatoclostridium ramosum	32	1	3.42e-07
GUT_GENOME058528|NODE_885_length_16204_cov_12.3796|3|16	SRR11829101|k141_277256_flag=1_multi=41.0000_len=9283	Pisuviricota	GUT_GENOME096257	d__Bacteria;p__Firmicutes;c__Bacilli;o__Erysipelotrichales;f__Erysipelatoclostridiaceae;g__Erysipelatoclostridium;s__Erysipelatoclostridium ramosum	32	1	3.42e-07
GUT_GENOME058528|NODE_885_length_16204_cov_12.3796|3|16	SRR11827441|k141_82251_flag=1_multi=10.0000_len=8641	Pisuviricota	GUT_GENOME096257	d__Bacteria;p__Firmicutes;c__Bacilli;o__Erysipelotrichales;f__Erysipelatoclostridiaceae;g__Erysipelatoclostridium;s__Erysipelatoclostridium ramosum	32	0	1.23e-06
GUT_GENOME058528|NODE_885_length_16204_cov_12.3796|3|16	SRR11829332|k141_165596_flag=1_multi=20.0000_len=7392	Pisuviricota	GUT_GENOME096257	d__Bacteria;p__Firmicutes;c__Bacilli;o__Erysipelotrichales;f__Erysipelatoclostridiaceae;g__Erysipelatoclostridium;s__Erysipelatoclostridium ramosum	27	0	0.00074
GUT_GENOME058528|NODE_885_length_16204_cov_12.3796|3|16	SRR11829103|k141_170280_flag=1_multi=12.0000_len=8794	Pisuviricota	GUT_GENOME096257	d__Bacteria;p__Firmicutes;c__Bacilli;o__Erysipelotrichales;f__Erysipelatoclostridiaceae;g__Erysipelatoclostridium;s__Erysipelatoclostridium ramosum	32	0	1.23e-06
GUT_GENOME058528|NODE_885_length_16204_cov_12.3796|3|16	SRR11648360|k141_140316_flag=1_multi=10.0000_len=5166	Pisuviricota	GUT_GENOME096257	d__Bacteria;p__Firmicutes;c__Bacilli;o__Erysipelotrichales;f__Erysipelatoclostridiaceae;g__Erysipelatoclostridium;s__Erysipelatoclostridium ramosum	36	3	4.42e-06
GUT_GENOME058528|NODE_885_length_16204_cov_12.3796|3|16	SRR11829101|k141_277256_flag=1_multi=41.0000_len=9283	Pisuviricota	GUT_GENOME096257	d__Bacteria;p__Firmicutes;c__Bacilli;o__Erysipelotrichales;f__Erysipelatoclostridiaceae;g__Erysipelatoclostridium;s__Erysipelatoclostridium ramosum	32	1	3.42e-07
GUT_GENOME058528|NODE_885_length_16204_cov_12.3796|3|16	SRR11829101|k141_277256_flag=1_multi=41.0000_len=9283	Pisuviricota	GUT_GENOME096257	d__Bacteria;p__Firmicutes;c__Bacilli;o__Erysipelotrichales;f__Erysipelatoclostridiaceae;g__Erysipelatoclostridium;s__Erysipelatoclostridium ramosum	32	1	3.42e-07
GUT_GENOME058528|NODE_885_length_16204_cov_12.3796|3|16	SRR11564268|k141_181711_flag=1_multi=11.0000_len=1814	Kitrinoviricota	GUT_GENOME096257	d__Bacteria;p__Firmicutes;c__Bacilli;o__Erysipelotrichales;f__Erysipelatoclostridiaceae;g__Erysipelatoclostridium;s__Erysipelatoclostridium ramosum	28	0	1.23e-06
GUT_GENOME058528|NODE_885_length_16204_cov_12.3796|3|16	SRR11564268|k141_181711_flag=1_multi=11.0000_len=1814	Kitrinoviricota	GUT_GENOME096257	d__Bacteria;p__Firmicutes;c__Bacilli;o__Erysipelotrichales;f__Erysipelatoclostridiaceae;g__Erysipelatoclostridium;s__Erysipelatoclostridium ramosum	28	0	1.23e-06
GUT_GENOME058528|NODE_885_length_16204_cov_12.3796|3|16	SRR11829103|k141_170280_flag=1_multi=12.0000_len=8794	Pisuviricota	GUT_GENOME096257	d__Bacteria;p__Firmicutes;c__Bacilli;o__Erysipelotrichales;f__Erysipelatoclostridiaceae;g__Erysipelatoclostridium;s__Erysipelatoclostridium ramosum	32	0	1.23e-06
GUT_GENOME058528|NODE_885_length_16204_cov_12.3796|3|16	SRR12685203|k141_82908_flag=1_multi=12.0000_len=5867	Pisuviricota	GUT_GENOME096257	d__Bacteria;p__Firmicutes;c__Bacilli;o__Erysipelotrichales;f__Erysipelatoclostridiaceae;g__Erysipelatoclostridium;s__Erysipelatoclostridium ramosum	29	0	5.72e-05
GUT_GENOME058528|NODE_885_length_16204_cov_12.3796|3|16	SRR11828460|k141_134285_flag=1_multi=5.0000_len=2422	Duplornaviricota	GUT_GENOME096257	d__Bacteria;p__Firmicutes;c__Bacilli;o__Erysipelotrichales;f__Erysipelatoclostridiaceae;g__Erysipelatoclostridium;s__Erysipelatoclostridium ramosum	33	1	1.59e-05
GUT_GENOME058528|NODE_885_length_16204_cov_12.3796|3|16	SRR11829103|k141_170280_flag=1_multi=12.0000_len=8794	Pisuviricota	GUT_GENOME096257	d__Bacteria;p__Firmicutes;c__Bacilli;o__Erysipelotrichales;f__Erysipelatoclostridiaceae;g__Erysipelatoclostridium;s__Erysipelatoclostridium ramosum	32	0	1.23e-06
GUT_GENOME058528|NODE_885_length_16204_cov_12.3796|3|16	SRR17497063|k141_163584_flag=1_multi=2672.0000_len=4270	Pisuviricota	GUT_GENOME096257	d__Bacteria;p__Firmicutes;c__Bacilli;o__Erysipelotrichales;f__Erysipelatoclostridiaceae;g__Erysipelatoclostridium;s__Erysipelatoclostridium ramosum	32	2	1.59e-05
GUT_GENOME058528|NODE_885_length_16204_cov_12.3796|3|16	SRR11829332|k141_75842_flag=1_multi=315.0000_len=9821	Pisuviricota	GUT_GENOME096257	d__Bacteria;p__Firmicutes;c__Bacilli;o__Erysipelotrichales;f__Erysipelatoclostridiaceae;g__Erysipelatoclostridium;s__Erysipelatoclostridium ramosum	30	0	1.59e-05
GUT_GENOME058528|NODE_885_length_16204_cov_12.3796|3|16	SRR11829101|k141_277256_flag=1_multi=41.0000_len=9283	Pisuviricota	GUT_GENOME096257	d__Bacteria;p__Firmicutes;c__Bacilli;o__Erysipelotrichales;f__Erysipelatoclostridiaceae;g__Erysipelatoclostridium;s__Erysipelatoclostridium ramosum	32	1	3.42e-07
GUT_GENOME058528|NODE_885_length_16204_cov_12.3796|3|16	SRR11827441|k141_82251_flag=1_multi=10.0000_len=8641	Pisuviricota	GUT_GENOME096257	d__Bacteria;p__Firmicutes;c__Bacilli;o__Erysipelotrichales;f__Erysipelatoclostridiaceae;g__Erysipelatoclostridium;s__Erysipelatoclostridium ramosum	32	0	1.23e-06
GUT_GENOME058528|NODE_885_length_16204_cov_12.3796|3|16	SRR11829101|k141_277256_flag=1_multi=41.0000_len=9283	Pisuviricota	GUT_GENOME096257	d__Bacteria;p__Firmicutes;c__Bacilli;o__Erysipelotrichales;f__Erysipelatoclostridiaceae;g__Erysipelatoclostridium;s__Erysipelatoclostridium ramosum	32	1	3.42e-07
GUT_GENOME058528|NODE_885_length_16204_cov_12.3796|3|16	SRR11827441|k141_82251_flag=1_multi=10.0000_len=8641	Pisuviricota	GUT_GENOME096257	d__Bacteria;p__Firmicutes;c__Bacilli;o__Erysipelotrichales;f__Erysipelatoclostridiaceae;g__Erysipelatoclostridium;s__Erysipelatoclostridium ramosum	32	0	1.23e-06
GUT_GENOME058528|NODE_885_length_16204_cov_12.3796|3|16	SRR11829103|k141_170280_flag=1_multi=12.0000_len=8794	Pisuviricota	GUT_GENOME096257	d__Bacteria;p__Firmicutes;c__Bacilli;o__Erysipelotrichales;f__Erysipelatoclostridiaceae;g__Erysipelatoclostridium;s__Erysipelatoclostridium ramosum	32	0	1.23e-06
GUT_GENOME059438|NODE_2733_length_9582_cov_5.241104|1|4	SRR11829105|k141_45160_flag=1_multi=11.0000_len=4557	Unclassified	GUT_GENOME001297	d__Bacteria;p__Firmicutes_A;c__Clostridia;o__Lachnospirales;f__Lachnospiraceae;g__Acetatifactor;s__Acetatifactor sp900066565	24	0	0.000113
GUT_GENOME059634|NODE_7_length_204582_cov_17.736|2|2	SRR5829904|k141_24749_flag=1_multi=8.0000_len=3809	Kitrinoviricota	GUT_GENOME000295	d__Bacteria;p__Firmicutes_A;c__Clostridia;o__Lachnospirales;f__Lachnospiraceae;g__Roseburia;s__Roseburia intestinalis	32	1	6e-05
GUT_GENOME059708|NODE_50_length_121786_cov_20.129195|1|3	SRR11649087|k141_72476_flag=1_multi=5.0000_len=1403	Negarnaviricota	GUT_GENOME000295	d__Bacteria;p__Firmicutes_A;c__Clostridia;o__Lachnospirales;f__Lachnospiraceae;g__Roseburia;s__Roseburia intestinalis	30	1	0.000296
GUT_GENOME061050|NODE_4772_length_4404_cov_4.17084|4|8	SRR11828459|k141_18049_flag=1_multi=4.0000_len=1029	Duplornaviricota	GUT_GENOME142330	d__Bacteria;p__Firmicutes_A;c__Clostridia;o__Peptostreptococcales;f__Peptostreptococcaceae;g__Clostridioides;s__Clostridioides difficile	29	1	1.11e-05
GUT_GENOME061504|NODE_136_length_100497_cov_14.1947|1|2	SRR7536466|k141_479843_flag=1_multi=15.0000_len=2684	Lenarviricota	GUT_GENOME140240	d__Bacteria;p__Bacteroidota;c__Bacteroidia;o__Bacteroidales;f__Bacteroidaceae;g__Bacteroides;s__Bacteroides faecis	26	1	0.000296
GUT_GENOME062146|NODE_672_length_20093_cov_12.5112|4|4	BC-0345649851|k141_51703	Kitrinoviricota	GUT_GENOME143211	d__Bacteria;p__Verrucomicrobiota;c__Verrucomicrobiae;o__Verrucomicrobiales;f__Akkermansiaceae;g__Akkermansia;s__Akkermansia muciniphila	24	0	0.000113
GUT_GENOME062682|NODE_1097_length_13398_cov_3.40403|1|8	SRR11828459|k141_18049_flag=1_multi=4.0000_len=1029	Duplornaviricota	GUT_GENOME142330	d__Bacteria;p__Firmicutes_A;c__Clostridia;o__Peptostreptococcales;f__Peptostreptococcaceae;g__Clostridioides;s__Clostridioides difficile	29	1	1.11e-05
GUT_GENOME063248|NODE_3188_length_13367_cov_4.393930|2|21	SRR12685052|k141_41450_flag=1_multi=10.0000_len=3431	Pisuviricota	GUT_GENOME140251	d__Bacteria;p__Firmicutes_C;c__Negativicutes;o__Selenomonadales;f__Selenomonadaceae;g__Megamonas;s__Megamonas funiformis	23	0	0.00074
GUT_GENOME064078|NODE_18_length_243329_cov_116.742|1|36	SRR11647877|k141_124098_flag=1_multi=13.0000_len=8597	Pisuviricota	GUT_GENOME239728	d__Bacteria;p__Firmicutes_A;c__Clostridia;o__Lachnospirales;f__Lachnospiraceae;g__Agathobacter;s__Agathobacter faecis	23	0	0.00037
GUT_GENOME065266|NODE_85_length_69151_cov_13.763242|3|22	SRR11450579|k141_152980_flag=1_multi=19.0000_len=3887	Lenarviricota	GUT_GENOME268665	d__Bacteria;p__Firmicutes;c__Bacilli;o__Lactobacillales;f__Streptococcaceae;g__Streptococcus;s__Streptococcus thermophilus	22	0	0.001
GUT_GENOME065266|NODE_85_length_69151_cov_13.763242|4|2	SRR11450579|k141_152980_flag=1_multi=19.0000_len=3887	Lenarviricota	GUT_GENOME268665	d__Bacteria;p__Firmicutes;c__Bacilli;o__Lactobacillales;f__Streptococcaceae;g__Streptococcus;s__Streptococcus thermophilus	22	0	0.001
GUT_GENOME065978|NODE_20_length_336952_cov_52.0182|2|1	SRR18771403|k141_156223_flag=1_multi=29.0000_len=9613	Pisuviricota	GUT_GENOME001120	d__Bacteria;p__Bacteroidota;c__Bacteroidia;o__Bacteroidales;f__Bacteroidaceae;g__Bacteroides;s__Bacteroides thetaiotaomicron	25	1	0.000666
GUT_GENOME066900|ERS235538|62|k99_6568|2|1	SRR17509974|k141_135279_flag=1_multi=189.0000_len=12132	Kitrinoviricota	GUT_GENOME018576	d__Bacteria;p__Bacteroidota;c__Bacteroidia;o__Bacteroidales;f__UBA932;g__RC9;s__RC9 sp000433355	30	1	0.000296
GUT_GENOME067229|ERS235551|37|k99_124025|5|12	SRR11829260|k141_99126_flag=1_multi=7.0000_len=3733	Kitrinoviricota	GUT_GENOME140265	d__Bacteria;p__Firmicutes_A;c__Clostridia;o__Lachnospirales;f__Lachnospiraceae;g__Blautia;s__Blautia sp000436935	23	0	0.000444
GUT_GENOME067804|ERS235578|29|k99_80520|3|2	SRR17497045|k141_335513_flag=1_multi=11.0000_len=7314	Negarnaviricota	GUT_GENOME143211	d__Bacteria;p__Verrucomicrobiota;c__Verrucomicrobiae;o__Verrucomicrobiales;f__Akkermansiaceae;g__Akkermansia;s__Akkermansia muciniphila	26	1	0.000777
GUT_GENOME071021|ERS396377|35|k79_56409|1|19	SRR11565167|k141_124505_flag=1_multi=11.0000_len=1677	Kitrinoviricota	GUT_GENOME143505	d__Bacteria;p__Bacteroidota;c__Bacteroidia;o__Bacteroidales;f__Bacteroidaceae;g__Bacteroides_B;s__Bacteroides_B dorei	32	1	1.71e-07
GUT_GENOME071021|ERS396377|35|k79_56409|1|19	SRR17509970|k141_1110097_flag=1_multi=29.0000_len=2075	Pisuviricota	GUT_GENOME143505	d__Bacteria;p__Bacteroidota;c__Bacteroidia;o__Bacteroidales;f__Bacteroidaceae;g__Bacteroides_B;s__Bacteroides_B dorei	26	1	0.00037
GUT_GENOME071021|ERS396377|35|k79_56409|1|19	SRR11829332|k141_140645_flag=1_multi=5.0000_len=2837	Pisuviricota	GUT_GENOME143505	d__Bacteria;p__Bacteroidota;c__Bacteroidia;o__Bacteroidales;f__Bacteroidaceae;g__Bacteroides_B;s__Bacteroides_B dorei	24	0	0.000103
GUT_GENOME071021|ERS396377|35|k79_56409|1|19	SRR11829332|k141_140645_flag=1_multi=5.0000_len=2837	Pisuviricota	GUT_GENOME143505	d__Bacteria;p__Bacteroidota;c__Bacteroidia;o__Bacteroidales;f__Bacteroidaceae;g__Bacteroides_B;s__Bacteroides_B dorei	24	0	0.000103
GUT_GENOME071021|ERS396377|35|k79_56409|1|19	SRR11829332|k141_140645_flag=1_multi=5.0000_len=2837	Pisuviricota	GUT_GENOME143505	d__Bacteria;p__Bacteroidota;c__Bacteroidia;o__Bacteroidales;f__Bacteroidaceae;g__Bacteroides_B;s__Bacteroides_B dorei	24	0	0.000103
GUT_GENOME071021|ERS396377|35|k79_56409|1|19	SRR11829332|k141_140645_flag=1_multi=5.0000_len=2837	Pisuviricota	GUT_GENOME143505	d__Bacteria;p__Bacteroidota;c__Bacteroidia;o__Bacteroidales;f__Bacteroidaceae;g__Bacteroides_B;s__Bacteroides_B dorei	24	0	0.000103
GUT_GENOME071021|ERS396377|35|k79_56409|1|19	SRR11649087|k141_62756_flag=1_multi=5.9805_len=5783	Pisuviricota	GUT_GENOME143505	d__Bacteria;p__Bacteroidota;c__Bacteroidia;o__Bacteroidales;f__Bacteroidaceae;g__Bacteroides_B;s__Bacteroides_B dorei	33	2	2.21e-06
GUT_GENOME071021|ERS396377|35|k79_56409|1|19	SRR11829332|k141_140645_flag=1_multi=5.0000_len=2837	Pisuviricota	GUT_GENOME143505	d__Bacteria;p__Bacteroidota;c__Bacteroidia;o__Bacteroidales;f__Bacteroidaceae;g__Bacteroides_B;s__Bacteroides_B dorei	24	0	0.000103
GUT_GENOME071021|ERS396377|35|k79_56409|1|19	SRR11649087|k141_62756_flag=1_multi=5.9805_len=5783	Pisuviricota	GUT_GENOME143505	d__Bacteria;p__Bacteroidota;c__Bacteroidia;o__Bacteroidales;f__Bacteroidaceae;g__Bacteroides_B;s__Bacteroides_B dorei	33	2	2.21e-06
GUT_GENOME071021|ERS396377|35|k79_56409|1|19	SRR11565167|k141_124505_flag=1_multi=11.0000_len=1677	Kitrinoviricota	GUT_GENOME143505	d__Bacteria;p__Bacteroidota;c__Bacteroidia;o__Bacteroidales;f__Bacteroidaceae;g__Bacteroides_B;s__Bacteroides_B dorei	32	1	1.71e-07
GUT_GENOME071021|ERS396377|35|k79_56409|1|19	SRR17509970|k141_1110097_flag=1_multi=29.0000_len=2075	Pisuviricota	GUT_GENOME143505	d__Bacteria;p__Bacteroidota;c__Bacteroidia;o__Bacteroidales;f__Bacteroidaceae;g__Bacteroides_B;s__Bacteroides_B dorei	26	1	0.00037
GUT_GENOME071021|ERS396377|35|k79_56409|1|19	SRR11829332|k141_140645_flag=1_multi=5.0000_len=2837	Pisuviricota	GUT_GENOME143505	d__Bacteria;p__Bacteroidota;c__Bacteroidia;o__Bacteroidales;f__Bacteroidaceae;g__Bacteroides_B;s__Bacteroides_B dorei	24	0	0.000103
GUT_GENOME071021|ERS396377|35|k79_56409|1|19	SRR11649087|k141_62756_flag=1_multi=5.9805_len=5783	Pisuviricota	GUT_GENOME143505	d__Bacteria;p__Bacteroidota;c__Bacteroidia;o__Bacteroidales;f__Bacteroidaceae;g__Bacteroides_B;s__Bacteroides_B dorei	33	2	2.21e-06
GUT_GENOME071021|ERS396377|35|k79_56409|1|19	SRR11565167|k141_124505_flag=1_multi=11.0000_len=1677	Kitrinoviricota	GUT_GENOME143505	d__Bacteria;p__Bacteroidota;c__Bacteroidia;o__Bacteroidales;f__Bacteroidaceae;g__Bacteroides_B;s__Bacteroides_B dorei	32	1	1.71e-07
GUT_GENOME071566|ERS396396|37|k85_172540|1|19	SRR11450579|k141_225818_flag=1_multi=84.0000_len=9187	Pisuviricota	GUT_GENOME239684	d__Bacteria;p__Firmicutes_A;c__Clostridia;o__Oscillospirales;f__Oscillospiraceae;g__ER4;s__ER4 sp000765235	26	1	0.000444
GUT_GENOME071671|ERS396399|39|k85_92595|1|9	SRR11829144|k141_97467_flag=1_multi=5.0000_len=1605	Pisuviricota	GUT_GENOME000308	d__Bacteria;p__Firmicutes_A;c__Clostridia;o__Lachnospirales;f__Lachnospiraceae;g__Lachnospira;s__Lachnospira rogosae	26	1	0.000518
GUT_GENOME072263|ERS396424|59|k79_47518|1|9	BC-0345321147|k141_61433	Kitrinoviricota	GUT_GENOME000109	d__Bacteria;p__Firmicutes;c__Bacilli;o__Erysipelotrichales;f__Erysipelatoclostridiaceae;g__Catenibacterium;s__Catenibacterium mitsuokai	26	1	0.000444
GUT_GENOME072537|ERS396435|83|k85_83623|2|7	SRR12685017|k141_24414_flag=1_multi=4.0000_len=2880	Pisuviricota	GUT_GENOME143211	d__Bacteria;p__Verrucomicrobiota;c__Verrucomicrobiae;o__Verrucomicrobiales;f__Akkermansiaceae;g__Akkermansia;s__Akkermansia muciniphila	26	1	0.000407
GUT_GENOME072904|ERS396448|8|k85_58762|2|1	SRR11649087|k141_72476_flag=1_multi=5.0000_len=1403	Negarnaviricota	GUT_GENOME000295	d__Bacteria;p__Firmicutes_A;c__Clostridia;o__Lachnospirales;f__Lachnospiraceae;g__Roseburia;s__Roseburia intestinalis	30	1	0.000296
GUT_GENOME073298|ERS396465|41|k85_42704|1|5	SRR12334072|k141_154640_flag=1_multi=8.1430_len=1672	Pisuviricota	GUT_GENOME001354	d__Bacteria;p__Proteobacteria;c__Gammaproteobacteria;o__Burkholderiales;f__Burkholderiaceae;g__Duodenibacillus;s__	26	1	0.00037
GUT_GENOME073298|ERS396465|41|k85_42704|1|5	SRR12610551|k141_30448_flag=1_multi=4.0000_len=1282	Pisuviricota	GUT_GENOME001354	d__Bacteria;p__Proteobacteria;c__Gammaproteobacteria;o__Burkholderiales;f__Burkholderiaceae;g__Duodenibacillus;s__	26	1	0.00037
GUT_GENOME073366|ERS396469|3|k79_53950|1|24	SRR12334072|k141_154640_flag=1_multi=8.1430_len=1672	Pisuviricota	GUT_GENOME001354	d__Bacteria;p__Proteobacteria;c__Gammaproteobacteria;o__Burkholderiales;f__Burkholderiaceae;g__Duodenibacillus;s__	26	1	0.00037
GUT_GENOME073366|ERS396469|3|k79_53950|1|24	SRR12610551|k141_30448_flag=1_multi=4.0000_len=1282	Pisuviricota	GUT_GENOME001354	d__Bacteria;p__Proteobacteria;c__Gammaproteobacteria;o__Burkholderiales;f__Burkholderiaceae;g__Duodenibacillus;s__	26	1	0.00037
GUT_GENOME073687|ERS396483|40|k85_61113|1|11	SRR11647985|k141_31767_flag=1_multi=10.0000_len=5731	Pisuviricota	GUT_GENOME239728	d__Bacteria;p__Firmicutes_A;c__Clostridia;o__Lachnospirales;f__Lachnospiraceae;g__Agathobacter;s__Agathobacter faecis	32	1	3.08e-07
GUT_GENOME073687|ERS396483|40|k85_61113|1|11	SRR11450585|k141_341492_flag=1_multi=25.0000_len=6112	Pisuviricota	GUT_GENOME239728	d__Bacteria;p__Firmicutes_A;c__Clostridia;o__Lachnospirales;f__Lachnospiraceae;g__Agathobacter;s__Agathobacter faecis	35	1	6.61e-09
GUT_GENOME074216|ERS396500|13|k85_56959|2|10	SRR11829105|k141_316358_flag=1_multi=20.0000_len=4155	Lenarviricota	GUT_GENOME000111	d__Bacteria;p__Firmicutes_C;c__Negativicutes;o__Selenomonadales;f__Selenomonadaceae;g__Mitsuokella;s__Mitsuokella jalaludinii	26	1	0.000444
GUT_GENOME074521|ERS396508|21|k85_669|1|2	SRR11648140|k141_81530_flag=1_multi=11.0000_len=4191	Kitrinoviricota	GUT_GENOME096029	d__Bacteria;p__Fusobacteriota;c__Fusobacteriia;o__Fusobacteriales;f__Fusobacteriaceae;g__Fusobacterium_C;s__Fusobacterium_C gonidiaformans	28	0	0.000134
GUT_GENOME074568|ERS396509|29|k85_61680|1|2	SRR7534623|k141_53445_flag=1_multi=56.0000_len=6647	Pisuviricota	GUT_GENOME148897	d__Bacteria;p__Bacteroidota;c__Bacteroidia;o__Bacteroidales;f__Muribaculaceae;g__CAG-279;s__CAG-279 sp000437795	23	0	0.000296
GUT_GENOME074697|ERS396512|9|k85_6608|3|21	SRR11649087|k141_72476_flag=1_multi=5.0000_len=1403	Negarnaviricota	GUT_GENOME000295	d__Bacteria;p__Firmicutes_A;c__Clostridia;o__Lachnospirales;f__Lachnospiraceae;g__Roseburia;s__Roseburia intestinalis	30	1	0.000296
GUT_GENOME075784|ERS473044|5|k99_12569|1|14	SRR12685203|k141_82908_flag=1_multi=12.0000_len=5867	Pisuviricota	GUT_GENOME096257	d__Bacteria;p__Firmicutes;c__Bacilli;o__Erysipelotrichales;f__Erysipelatoclostridiaceae;g__Erysipelatoclostridium;s__Erysipelatoclostridium ramosum	29	0	5.72e-05
GUT_GENOME075784|ERS473044|5|k99_12569|1|14	SRR11564268|k141_181711_flag=1_multi=11.0000_len=1814	Kitrinoviricota	GUT_GENOME096257	d__Bacteria;p__Firmicutes;c__Bacilli;o__Erysipelotrichales;f__Erysipelatoclostridiaceae;g__Erysipelatoclostridium;s__Erysipelatoclostridium ramosum	28	0	1.23e-06
GUT_GENOME075784|ERS473044|5|k99_12569|1|14	SRR11829101|k141_277256_flag=1_multi=41.0000_len=9283	Pisuviricota	GUT_GENOME096257	d__Bacteria;p__Firmicutes;c__Bacilli;o__Erysipelotrichales;f__Erysipelatoclostridiaceae;g__Erysipelatoclostridium;s__Erysipelatoclostridium ramosum	32	1	3.42e-07
GUT_GENOME075784|ERS473044|5|k99_12569|1|14	SRR11829101|k141_277256_flag=1_multi=41.0000_len=9283	Pisuviricota	GUT_GENOME096257	d__Bacteria;p__Firmicutes;c__Bacilli;o__Erysipelotrichales;f__Erysipelatoclostridiaceae;g__Erysipelatoclostridium;s__Erysipelatoclostridium ramosum	32	1	3.42e-07
GUT_GENOME075784|ERS473044|5|k99_12569|1|14	SRR12685203|k141_82908_flag=1_multi=12.0000_len=5867	Pisuviricota	GUT_GENOME096257	d__Bacteria;p__Firmicutes;c__Bacilli;o__Erysipelotrichales;f__Erysipelatoclostridiaceae;g__Erysipelatoclostridium;s__Erysipelatoclostridium ramosum	29	0	5.72e-05
GUT_GENOME075784|ERS473044|5|k99_12569|1|14	SRR11648360|k141_140316_flag=1_multi=10.0000_len=5166	Pisuviricota	GUT_GENOME096257	d__Bacteria;p__Firmicutes;c__Bacilli;o__Erysipelotrichales;f__Erysipelatoclostridiaceae;g__Erysipelatoclostridium;s__Erysipelatoclostridium ramosum	36	3	4.42e-06
GUT_GENOME075784|ERS473044|5|k99_12569|1|14	SRR11829103|k141_170280_flag=1_multi=12.0000_len=8794	Pisuviricota	GUT_GENOME096257	d__Bacteria;p__Firmicutes;c__Bacilli;o__Erysipelotrichales;f__Erysipelatoclostridiaceae;g__Erysipelatoclostridium;s__Erysipelatoclostridium ramosum	32	0	1.23e-06
GUT_GENOME075784|ERS473044|5|k99_12569|1|14	SRR11829332|k141_165596_flag=1_multi=20.0000_len=7392	Pisuviricota	GUT_GENOME096257	d__Bacteria;p__Firmicutes;c__Bacilli;o__Erysipelotrichales;f__Erysipelatoclostridiaceae;g__Erysipelatoclostridium;s__Erysipelatoclostridium ramosum	27	0	0.00074
GUT_GENOME075784|ERS473044|5|k99_12569|1|14	SRR11829101|k141_277256_flag=1_multi=41.0000_len=9283	Pisuviricota	GUT_GENOME096257	d__Bacteria;p__Firmicutes;c__Bacilli;o__Erysipelotrichales;f__Erysipelatoclostridiaceae;g__Erysipelatoclostridium;s__Erysipelatoclostridium ramosum	32	1	3.42e-07
GUT_GENOME075784|ERS473044|5|k99_12569|1|14	SRR11564268|k141_181711_flag=1_multi=11.0000_len=1814	Kitrinoviricota	GUT_GENOME096257	d__Bacteria;p__Firmicutes;c__Bacilli;o__Erysipelotrichales;f__Erysipelatoclostridiaceae;g__Erysipelatoclostridium;s__Erysipelatoclostridium ramosum	28	0	1.23e-06
GUT_GENOME075784|ERS473044|5|k99_12569|1|14	SRR11827441|k141_82251_flag=1_multi=10.0000_len=8641	Pisuviricota	GUT_GENOME096257	d__Bacteria;p__Firmicutes;c__Bacilli;o__Erysipelotrichales;f__Erysipelatoclostridiaceae;g__Erysipelatoclostridium;s__Erysipelatoclostridium ramosum	32	0	1.23e-06
GUT_GENOME075784|ERS473044|5|k99_12569|1|14	SRR11829103|k141_170280_flag=1_multi=12.0000_len=8794	Pisuviricota	GUT_GENOME096257	d__Bacteria;p__Firmicutes;c__Bacilli;o__Erysipelotrichales;f__Erysipelatoclostridiaceae;g__Erysipelatoclostridium;s__Erysipelatoclostridium ramosum	32	0	1.23e-06
GUT_GENOME075784|ERS473044|5|k99_12569|1|14	SRR11828460|k141_134285_flag=1_multi=5.0000_len=2422	Duplornaviricota	GUT_GENOME096257	d__Bacteria;p__Firmicutes;c__Bacilli;o__Erysipelotrichales;f__Erysipelatoclostridiaceae;g__Erysipelatoclostridium;s__Erysipelatoclostridium ramosum	33	1	1.59e-05
GUT_GENOME075784|ERS473044|5|k99_12569|1|14	SRR11829101|k141_277256_flag=1_multi=41.0000_len=9283	Pisuviricota	GUT_GENOME096257	d__Bacteria;p__Firmicutes;c__Bacilli;o__Erysipelotrichales;f__Erysipelatoclostridiaceae;g__Erysipelatoclostridium;s__Erysipelatoclostridium ramosum	32	1	3.42e-07
GUT_GENOME075784|ERS473044|5|k99_12569|1|14	SRR11829332|k141_75842_flag=1_multi=315.0000_len=9821	Pisuviricota	GUT_GENOME096257	d__Bacteria;p__Firmicutes;c__Bacilli;o__Erysipelotrichales;f__Erysipelatoclostridiaceae;g__Erysipelatoclostridium;s__Erysipelatoclostridium ramosum	30	0	1.59e-05
GUT_GENOME075784|ERS473044|5|k99_12569|1|14	SRR11827441|k141_82251_flag=1_multi=10.0000_len=8641	Pisuviricota	GUT_GENOME096257	d__Bacteria;p__Firmicutes;c__Bacilli;o__Erysipelotrichales;f__Erysipelatoclostridiaceae;g__Erysipelatoclostridium;s__Erysipelatoclostridium ramosum	32	0	1.23e-06
GUT_GENOME075784|ERS473044|5|k99_12569|1|14	SRR17497063|k141_163584_flag=1_multi=2672.0000_len=4270	Pisuviricota	GUT_GENOME096257	d__Bacteria;p__Firmicutes;c__Bacilli;o__Erysipelotrichales;f__Erysipelatoclostridiaceae;g__Erysipelatoclostridium;s__Erysipelatoclostridium ramosum	32	2	1.59e-05
GUT_GENOME075784|ERS473044|5|k99_12569|1|14	SRR11829101|k141_277256_flag=1_multi=41.0000_len=9283	Pisuviricota	GUT_GENOME096257	d__Bacteria;p__Firmicutes;c__Bacilli;o__Erysipelotrichales;f__Erysipelatoclostridiaceae;g__Erysipelatoclostridium;s__Erysipelatoclostridium ramosum	32	1	3.42e-07
GUT_GENOME075784|ERS473044|5|k99_12569|1|14	SRR11827441|k141_82251_flag=1_multi=10.0000_len=8641	Pisuviricota	GUT_GENOME096257	d__Bacteria;p__Firmicutes;c__Bacilli;o__Erysipelotrichales;f__Erysipelatoclostridiaceae;g__Erysipelatoclostridium;s__Erysipelatoclostridium ramosum	32	0	1.23e-06
GUT_GENOME075784|ERS473044|5|k99_12569|1|14	SRR11829101|k141_277256_flag=1_multi=41.0000_len=9283	Pisuviricota	GUT_GENOME096257	d__Bacteria;p__Firmicutes;c__Bacilli;o__Erysipelotrichales;f__Erysipelatoclostridiaceae;g__Erysipelatoclostridium;s__Erysipelatoclostridium ramosum	32	1	3.42e-07
GUT_GENOME075784|ERS473044|5|k99_12569|1|14	SRR11829103|k141_170280_flag=1_multi=12.0000_len=8794	Pisuviricota	GUT_GENOME096257	d__Bacteria;p__Firmicutes;c__Bacilli;o__Erysipelotrichales;f__Erysipelatoclostridiaceae;g__Erysipelatoclostridium;s__Erysipelatoclostridium ramosum	32	0	1.23e-06
GUT_GENOME075784|ERS473044|5|k99_12569|1|14	SRR11829103|k141_170280_flag=1_multi=12.0000_len=8794	Pisuviricota	GUT_GENOME096257	d__Bacteria;p__Firmicutes;c__Bacilli;o__Erysipelotrichales;f__Erysipelatoclostridiaceae;g__Erysipelatoclostridium;s__Erysipelatoclostridium ramosum	32	0	1.23e-06
GUT_GENOME077003|ERS473141|14|k99_9764|1|1	SRR5829904|k141_24749_flag=1_multi=8.0000_len=3809	Kitrinoviricota	GUT_GENOME000295	d__Bacteria;p__Firmicutes_A;c__Clostridia;o__Lachnospirales;f__Lachnospiraceae;g__Roseburia;s__Roseburia intestinalis	32	1	6e-05
GUT_GENOME077090|ERS473148|48|k99_91864|5|3	SRR11649087|k141_72476_flag=1_multi=5.0000_len=1403	Negarnaviricota	GUT_GENOME000295	d__Bacteria;p__Firmicutes_A;c__Clostridia;o__Lachnospirales;f__Lachnospiraceae;g__Roseburia;s__Roseburia intestinalis	30	1	0.000296
GUT_GENOME078005|ERS473221|41|k99_15318|1|1	SRR11829099|k141_172493_flag=3_multi=17.0047_len=3780	Negarnaviricota	GUT_GENOME078005	d__Bacteria;p__Fusobacteriota;c__Fusobacteriia;o__Fusobacteriales;f__Fusobacteriaceae;g__Fusobacterium_B;s__	31	1	0.000226
GUT_GENOME078490|ERS473255|4|k99_33171|4|8	SRR11828459|k141_18049_flag=1_multi=4.0000_len=1029	Duplornaviricota	GUT_GENOME142330	d__Bacteria;p__Firmicutes_A;c__Clostridia;o__Peptostreptococcales;f__Peptostreptococcaceae;g__Clostridioides;s__Clostridioides difficile	29	1	1.11e-05
GUT_GENOME078956|ERS473292|3|k99_7079|3|1	SRR8526272|k141_21115_flag=1_multi=14.0000_len=13168	Unclassified	GUT_GENOME096529	d__Bacteria;p__Actinobacteriota;c__Actinobacteria;o__Actinomycetales;f__Actinomycetaceae;g__Pauljensenia;s__Pauljensenia radingae	27	0	0.000185
GUT_GENOME079652|ERS473351|21|k99_19616|4|4	BC-0345649851|k141_51703	Kitrinoviricota	GUT_GENOME143211	d__Bacteria;p__Verrucomicrobiota;c__Verrucomicrobiae;o__Verrucomicrobiales;f__Akkermansiaceae;g__Akkermansia;s__Akkermansia muciniphila	24	0	0.000113
GUT_GENOME080203|ERS473396|3|k99_9716|4|8	SRR11828459|k141_18049_flag=1_multi=4.0000_len=1029	Duplornaviricota	GUT_GENOME142330	d__Bacteria;p__Firmicutes_A;c__Clostridia;o__Peptostreptococcales;f__Peptostreptococcaceae;g__Clostridioides;s__Clostridioides difficile	29	1	1.11e-05
GUT_GENOME081726|ERS537224|87|k99_46201|7|21	SRR12685052|k141_41450_flag=1_multi=10.0000_len=3431	Pisuviricota	GUT_GENOME140251	d__Bacteria;p__Firmicutes_C;c__Negativicutes;o__Selenomonadales;f__Selenomonadaceae;g__Megamonas;s__Megamonas funiformis	23	0	0.00074
GUT_GENOME083287|ERS537280|25|k99_34810|2|35	SRR11647877|k141_124098_flag=1_multi=13.0000_len=8597	Pisuviricota	GUT_GENOME239728	d__Bacteria;p__Firmicutes_A;c__Clostridia;o__Lachnospirales;f__Lachnospiraceae;g__Agathobacter;s__Agathobacter faecis	23	0	0.00037
GUT_GENOME083287|ERS537280|25|k99_34810|3|35	SRR11647877|k141_124098_flag=1_multi=13.0000_len=8597	Pisuviricota	GUT_GENOME239728	d__Bacteria;p__Firmicutes_A;c__Clostridia;o__Lachnospirales;f__Lachnospiraceae;g__Agathobacter;s__Agathobacter faecis	23	0	0.00037
GUT_GENOME084775|ERS537332|58|k99_22658|4|7	SRR12685052|k141_41450_flag=1_multi=10.0000_len=3431	Pisuviricota	GUT_GENOME140251	d__Bacteria;p__Firmicutes_C;c__Negativicutes;o__Selenomonadales;f__Selenomonadaceae;g__Megamonas;s__Megamonas funiformis	23	0	0.000481
GUT_GENOME084891|ERS537336|24|k99_51614|1|30	SRR18776295|k141_583926_flag=1_multi=24.0000_len=4757	Pisuviricota	GUT_GENOME000308	d__Bacteria;p__Firmicutes_A;c__Clostridia;o__Lachnospirales;f__Lachnospiraceae;g__Lachnospira;s__Lachnospira rogosae	30	1	0.000481
GUT_GENOME085003|ERS537339|70|k99_146236|1|20	BC-0345690871|k141_77843	Lenarviricota	GUT_GENOME140251	d__Bacteria;p__Firmicutes_C;c__Negativicutes;o__Selenomonadales;f__Selenomonadaceae;g__Megamonas;s__Megamonas funiformis	26	1	0.000666
GUT_GENOME087423|ERS608493|88|k95_9163|2|6	SRR7004411|k141_34227_flag=1_multi=14.0000_len=5878	Kitrinoviricota	GUT_GENOME093688	d__Bacteria;p__Firmicutes_A;c__Clostridia;o__Oscillospirales;f__Oscillospiraceae;g__CAG-110;s__	27	0	0.000444
GUT_GENOME088094|ERS608522|3|k93_26913|2|5	SRR11450586|k141_68023_flag=1_multi=9.0000_len=2058	Pisuviricota	GUT_GENOME018576	d__Bacteria;p__Bacteroidota;c__Bacteroidia;o__Bacteroidales;f__UBA932;g__RC9;s__RC9 sp000433355	27	1	0.000123
GUT_GENOME088394|ERS608535|53|k95_217479|3|3	SRR11565438|k141_64735_flag=1_multi=12.0000_len=4095	Lenarviricota	GUT_GENOME125875	d__Bacteria;p__Firmicutes_A;c__Clostridia;o__Christensenellales;f__CAG-74;g__;s__	27	0	0.000407
GUT_GENOME089064|ERS608562|4|k97_7831|3|22	SRR11450579|k141_152980_flag=1_multi=19.0000_len=3887	Lenarviricota	GUT_GENOME268665	d__Bacteria;p__Firmicutes;c__Bacilli;o__Lactobacillales;f__Streptococcaceae;g__Streptococcus;s__Streptococcus thermophilus	22	0	0.001
GUT_GENOME089064|ERS608562|4|k97_7831|4|15	SRR11450579|k141_152980_flag=1_multi=19.0000_len=3887	Lenarviricota	GUT_GENOME268665	d__Bacteria;p__Firmicutes;c__Bacilli;o__Lactobacillales;f__Streptococcaceae;g__Streptococcus;s__Streptococcus thermophilus	22	0	0.001
GUT_GENOME089125|ERS608565|41|k95_23840|3|21	SRR11450579|k141_152980_flag=1_multi=19.0000_len=3887	Lenarviricota	GUT_GENOME268665	d__Bacteria;p__Firmicutes;c__Bacilli;o__Lactobacillales;f__Streptococcaceae;g__Streptococcus;s__Streptococcus thermophilus	22	0	0.001
GUT_GENOME089824|ERS608590|21|k95_117643|1|14	SRR11647991|k141_193406_flag=1_multi=6.0000_len=6063	Pisuviricota	GUT_GENOME001659	d__Bacteria;p__Firmicutes_A;c__Clostridia;o__Oscillospirales;f__Acutalibacteraceae;g__Ruminococcus_E;s__Ruminococcus_E bromii_B	23	0	0.000259
GUT_GENOME092261|NODE_254_length_70314_cov_4.12652|1|17	SRR18771403|k141_143859_flag=1_multi=26.0000_len=4799	Pisuviricota	GUT_GENOME009178	d__Bacteria;p__Firmicutes_A;c__Clostridia;o__Lachnospirales;f__Lachnospiraceae;g__UBA11774;s__UBA11774 sp003507655	24	0	8.23e-05
GUT_GENOME093688|NODE_507_length_46351_cov_4.00011|1|5	SRR7004411|k141_34227_flag=1_multi=14.0000_len=5878	Kitrinoviricota	GUT_GENOME093688	d__Bacteria;p__Firmicutes_A;c__Clostridia;o__Oscillospirales;f__Oscillospiraceae;g__CAG-110;s__	27	0	0.000444
GUT_GENOME093800|NODE_38_length_83650_cov_22.7383|1|5	SRR11450586|k141_68023_flag=1_multi=9.0000_len=2058	Pisuviricota	GUT_GENOME018576	d__Bacteria;p__Bacteroidota;c__Bacteroidia;o__Bacteroidales;f__UBA932;g__RC9;s__RC9 sp000433355	27	1	0.000123
GUT_GENOME095707|NODE_1009_length_17612_cov_16.4618|1|11	SRR18776303|k141_222331_flag=1_multi=6.0000_len=2763	Negarnaviricota	GUT_GENOME095707	d__Bacteria;p__Firmicutes_A;c__Clostridia;o__Oscillospirales;f__Oscillospiraceae;g__;s__	27	0	0.000407
GUT_GENOME096010|NZ_DS996841.1|1|11	SRR11075871|k141_783748_flag=1_multi=8.0000_len=3455	Negarnaviricota	GUT_GENOME103864	d__Bacteria;p__Firmicutes;c__Bacilli;o__Erysipelotrichales;f__Erysipelotrichaceae;g__Holdemanella;s__Holdemanella biformis	27	0	0.000666
GUT_GENOME096010|NZ_DS996841.1|2|2	SRR11075871|k141_783748_flag=1_multi=8.0000_len=3455	Negarnaviricota	GUT_GENOME103864	d__Bacteria;p__Firmicutes;c__Bacilli;o__Erysipelotrichales;f__Erysipelotrichaceae;g__Holdemanella;s__Holdemanella biformis	23	0	0.000481
GUT_GENOME096028|NZ_KN173678.1|5|7	SRR11829331|k141_80604_flag=1_multi=16.0000_len=5519	Kitrinoviricota	GUT_GENOME096028	d__Bacteria;p__Fusobacteriota;c__Fusobacteriia;o__Fusobacteriales;f__Fusobacteriaceae;g__Fusobacterium;s__Fusobacterium periodonticum_D	30	1	0.000518
GUT_GENOME096130|NZ_AAXG02000001.1|1|67	SRR11076227|k141_616296_flag=1_multi=7.0000_len=2536	Pisuviricota	GUT_GENOME000271	d__Bacteria;p__Firmicutes_A;c__Clostridia;o__Oscillospirales;f__Oscillospiraceae;g__Pseudoflavonifractor;s__Pseudoflavonifractor capillosus	23	0	0.000444
GUT_GENOME096443|NZ_CCFE01000030.1|3|100	BC-0302412855|k141_51857	Kitrinoviricota	GUT_GENOME096443	d__Bacteria;p__Firmicutes;c__Bacilli;o__Bacillales;f__Bacillaceae_A;g__Bacillus_W;s__Bacillus_W rubiinfantis	24	0	0.000123
GUT_GENOME096443|NZ_CCFE01000030.1|3|100	BC-0338302611|k141_56601	Kitrinoviricota	GUT_GENOME096443	d__Bacteria;p__Firmicutes;c__Bacilli;o__Bacillales;f__Bacillaceae_A;g__Bacillus_W;s__Bacillus_W rubiinfantis	23	0	0.000444
GUT_GENOME096443|NZ_CCFE01000030.1|3|100	SRR7539306|k141_144248_flag=1_multi=18.0000_len=1697	Kitrinoviricota	GUT_GENOME096443	d__Bacteria;p__Firmicutes;c__Bacilli;o__Bacillales;f__Bacillaceae_A;g__Bacillus_W;s__Bacillus_W rubiinfantis	23	0	0.000444
GUT_GENOME096443|NZ_CCFE01000030.1|3|100	BC-0338318897|k141_101245	Kitrinoviricota	GUT_GENOME096443	d__Bacteria;p__Firmicutes;c__Bacilli;o__Bacillales;f__Bacillaceae_A;g__Bacillus_W;s__Bacillus_W rubiinfantis	23	0	0.000444
GUT_GENOME096443|NZ_CCFE01000030.1|3|100	BC-0332573607|k141_27295	Kitrinoviricota	GUT_GENOME096443	d__Bacteria;p__Firmicutes;c__Bacilli;o__Bacillales;f__Bacillaceae_A;g__Bacillus_W;s__Bacillus_W rubiinfantis	26	1	0.000444
GUT_GENOME096443|NZ_CCFE01000030.1|3|100	BC-0345649851|k141_97201	Kitrinoviricota	GUT_GENOME096443	d__Bacteria;p__Firmicutes;c__Bacilli;o__Bacillales;f__Bacillaceae_A;g__Bacillus_W;s__Bacillus_W rubiinfantis	30	1	0.000444
GUT_GENOME096443|NZ_CCFE01000030.1|3|100	BC-0345317962|k141_58680	Kitrinoviricota	GUT_GENOME096443	d__Bacteria;p__Firmicutes;c__Bacilli;o__Bacillales;f__Bacillaceae_A;g__Bacillus_W;s__Bacillus_W rubiinfantis	23	0	0.000444
GUT_GENOME096443|NZ_CCFE01000030.1|3|100	BC-0302411076|k141_41833	Kitrinoviricota	GUT_GENOME096443	d__Bacteria;p__Firmicutes;c__Bacilli;o__Bacillales;f__Bacillaceae_A;g__Bacillus_W;s__Bacillus_W rubiinfantis	23	0	0.000444
GUT_GENOME096443|NZ_CCFE01000030.1|3|100	SRR7004595|k141_30626_flag=1_multi=10.0000_len=1737	Kitrinoviricota	GUT_GENOME096443	d__Bacteria;p__Firmicutes;c__Bacilli;o__Bacillales;f__Bacillaceae_A;g__Bacillus_W;s__Bacillus_W rubiinfantis	23	0	0.000444
GUT_GENOME096533|NZ_LN909045.1|4|5	SRR12685680|k141_67519_flag=1_multi=7.0000_len=2755	Unclassified	GUT_GENOME096533	d__Bacteria;p__Firmicutes_I;c__Bacilli_A;o__Paenibacillales;f__Paenibacillaceae;g__Paenibacillus_A;s__Paenibacillus_A senegalimassiliensis	30	1	0.000444
GUT_GENOME097699|NODE_74_length_162436_cov_14.2697|2|1	BC-0302411580|k141_4922	Lenarviricota	GUT_GENOME143602	d__Bacteria;p__Fusobacteriota;c__Fusobacteriia;o__Fusobacteriales;f__Fusobacteriaceae;g__Fusobacterium_A;s__Fusobacterium_A mortiferum	24	0	0.000123
GUT_GENOME097771|NODE_1095_length_20610_cov_3.24398|1|2	SRR13696271|k141_83256_flag=1_multi=10.0000_len=2611	Pisuviricota	GUT_GENOME239663	d__Bacteria;p__Firmicutes_A;c__Clostridia;o__Oscillospirales;f__Ruminococcaceae;g__Ruthenibacterium;s__Ruthenibacterium lactatiformans	26	1	0.000296
GUT_GENOME097794|NODE_4304_length_4882_cov_5.33934|1|7	SRR11828806|k141_193153_flag=1_multi=23.6586_len=9018	Pisuviricota	GUT_GENOME143602	d__Bacteria;p__Fusobacteriota;c__Fusobacteriia;o__Fusobacteriales;f__Fusobacteriaceae;g__Fusobacterium_A;s__Fusobacterium_A mortiferum	26	1	0.00074
GUT_GENOME097898|NODE_23_length_162843_cov_13.3965|2|1	BC-0302411580|k141_4922	Lenarviricota	GUT_GENOME143602	d__Bacteria;p__Fusobacteriota;c__Fusobacteriia;o__Fusobacteriales;f__Fusobacteriaceae;g__Fusobacterium_A;s__Fusobacterium_A mortiferum	24	0	0.000123
GUT_GENOME097924|NODE_423_length_65488_cov_104.66|1|8	SRR13696271|k141_83256_flag=1_multi=10.0000_len=2611	Pisuviricota	GUT_GENOME239663	d__Bacteria;p__Firmicutes_A;c__Clostridia;o__Oscillospirales;f__Ruminococcaceae;g__Ruthenibacterium;s__Ruthenibacterium lactatiformans	26	1	0.000296
GUT_GENOME097948|NODE_1877_length_10978_cov_9.52952|1|7	SRR11828806|k141_193153_flag=1_multi=23.6586_len=9018	Pisuviricota	GUT_GENOME143602	d__Bacteria;p__Fusobacteriota;c__Fusobacteriia;o__Fusobacteriales;f__Fusobacteriaceae;g__Fusobacterium_A;s__Fusobacterium_A mortiferum	26	1	0.00074
GUT_GENOME098016|NODE_4617_length_5255_cov_2.93212|1|7	SRR11828806|k141_193153_flag=1_multi=23.6586_len=9018	Pisuviricota	GUT_GENOME143602	d__Bacteria;p__Fusobacteriota;c__Fusobacteriia;o__Fusobacteriales;f__Fusobacteriaceae;g__Fusobacterium_A;s__Fusobacterium_A mortiferum	26	1	0.00074
GUT_GENOME098247|NODE_403_length_58836_cov_9.3751|2|20	SRR11565436|k141_85089_flag=1_multi=23.0000_len=7591	Pisuviricota	GUT_GENOME000245	d__Bacteria;p__Firmicutes_A;c__Clostridia;o__Peptostreptococcales;f__Peptostreptococcaceae;g__Intestinibacter;s__Intestinibacter bartlettii	23	0	0.000481
GUT_GENOME098524|NODE_565_length_43982_cov_10.1959|2|13	SRR17497126|k141_57778_flag=1_multi=710.0000_len=9229	Pisuviricota	GUT_GENOME239728	d__Bacteria;p__Firmicutes_A;c__Clostridia;o__Lachnospirales;f__Lachnospiraceae;g__Agathobacter;s__Agathobacter faecis	27	1	0.000144
GUT_GENOME098920|NODE_960_length_21728_cov_56.1449|1|13	SRR11678313|k141_145520_flag=1_multi=64.0000_len=7067	Kitrinoviricota	GUT_GENOME251083	d__Bacteria;p__Firmicutes_A;c__Clostridia;o__Oscillospirales;f__Ruminococcaceae;g__Gemmiger;s__Gemmiger sp003476825	26	1	0.00037
GUT_GENOME099262|NODE_414_length_63570_cov_45.5381|2|6	SRR5829969|k141_27088_flag=1_multi=5.0000_len=1823	Kitrinoviricota	GUT_GENOME096063	d__Bacteria;p__Bacteroidota;c__Bacteroidia;o__Bacteroidales;f__Bacteroidaceae;g__Bacteroides;s__Bacteroides fragilis	26	0	0.001
GUT_GENOME100078|NODE_29_length_217117_cov_7.36236|2|44	SRR11564270|k141_59032_flag=1_multi=7.0000_len=3355	Kitrinoviricota	GUT_GENOME001029	d__Bacteria;p__Firmicutes_A;c__Clostridia;o__Lachnospirales;f__Lachnospiraceae;g__CAG-127;s__CAG-127 sp900319515	23	0	0.000481
GUT_GENOME100892|NODE_197_length_77351_cov_10.0663|1|14	SRR18771403|k141_143859_flag=1_multi=26.0000_len=4799	Pisuviricota	GUT_GENOME009178	d__Bacteria;p__Firmicutes_A;c__Clostridia;o__Lachnospirales;f__Lachnospiraceae;g__UBA11774;s__UBA11774 sp003507655	24	0	8.23e-05
GUT_GENOME103842|NZ_AAXG02000001|1|67	SRR11076227|k141_616296_flag=1_multi=7.0000_len=2536	Pisuviricota	GUT_GENOME000271	d__Bacteria;p__Firmicutes_A;c__Clostridia;o__Oscillospirales;f__Oscillospiraceae;g__Pseudoflavonifractor;s__Pseudoflavonifractor capillosus	23	0	0.000444
GUT_GENOME103864|NZ_ABYT01000036|1|11	SRR11075871|k141_783748_flag=1_multi=8.0000_len=3455	Negarnaviricota	GUT_GENOME103864	d__Bacteria;p__Firmicutes;c__Bacilli;o__Erysipelotrichales;f__Erysipelotrichaceae;g__Holdemanella;s__Holdemanella biformis	27	0	0.000666
GUT_GENOME103864|NZ_ABYT01000036|2|2	SRR11075871|k141_783748_flag=1_multi=8.0000_len=3455	Negarnaviricota	GUT_GENOME103864	d__Bacteria;p__Firmicutes;c__Bacilli;o__Erysipelotrichales;f__Erysipelotrichaceae;g__Holdemanella;s__Holdemanella biformis	23	0	0.000481
GUT_GENOME104706|NODE_408_length_73945_cov_11.6742|3|18	SRR11450579|k141_152980_flag=1_multi=19.0000_len=3887	Lenarviricota	GUT_GENOME268665	d__Bacteria;p__Firmicutes;c__Bacilli;o__Lactobacillales;f__Streptococcaceae;g__Streptococcus;s__Streptococcus thermophilus	22	0	0.001
GUT_GENOME105435|NODE_201_length_70138_cov_23.7602|2|97	SRR11829144|k141_52148_flag=1_multi=34.0000_len=6587	Duplornaviricota	GUT_GENOME132205	d__Archaea;p__Euryarchaeota;c__Methanobacteria;o__Methanobacteriales;f__Methanobacteriaceae;g__Methanobrevibacter_A;s__Methanobrevibacter_A smithii	23	0	0.000777
GUT_GENOME107039|NODE_8_length_274607_cov_14.1098|2|3	SRR5829904|k141_24749_flag=1_multi=8.0000_len=3809	Kitrinoviricota	GUT_GENOME000295	d__Bacteria;p__Firmicutes_A;c__Clostridia;o__Lachnospirales;f__Lachnospiraceae;g__Roseburia;s__Roseburia intestinalis	32	1	6e-05
GUT_GENOME107047|NODE_5_length_273654_cov_27.1588|1|1	SRR5829904|k141_24749_flag=1_multi=8.0000_len=3809	Kitrinoviricota	GUT_GENOME000295	d__Bacteria;p__Firmicutes_A;c__Clostridia;o__Lachnospirales;f__Lachnospiraceae;g__Roseburia;s__Roseburia intestinalis	32	1	6e-05
GUT_GENOME107159|NODE_8_length_200854_cov_10.1198|1|1	SRR5829904|k141_24749_flag=1_multi=8.0000_len=3809	Kitrinoviricota	GUT_GENOME000295	d__Bacteria;p__Firmicutes_A;c__Clostridia;o__Lachnospirales;f__Lachnospiraceae;g__Roseburia;s__Roseburia intestinalis	32	1	6e-05
GUT_GENOME107238|NODE_159_length_54712_cov_12.245|2|2	SRR5829904|k141_24749_flag=1_multi=8.0000_len=3809	Kitrinoviricota	GUT_GENOME000295	d__Bacteria;p__Firmicutes_A;c__Clostridia;o__Lachnospirales;f__Lachnospiraceae;g__Roseburia;s__Roseburia intestinalis	32	1	6e-05
GUT_GENOME107745|NODE_2784_length_7840_cov_2.24855|1|1	SRR11827439|k141_88657_flag=0_multi=37.0000_len=5182	Pisuviricota	GUT_GENOME132205	d__Archaea;p__Euryarchaeota;c__Methanobacteria;o__Methanobacteriales;f__Methanobacteriaceae;g__Methanobrevibacter_A;s__Methanobrevibacter_A smithii	30	1	0.000481
GUT_GENOME108868|NODE_434_length_30624_cov_4.90055|1|34	SRR11829261|k141_193562_flag=1_multi=43.0000_len=8899	Pisuviricota	GUT_GENOME013560	d__Bacteria;p__Spirochaetota;c__Brachyspirae;o__Brachyspirales;f__Brachyspiraceae;g__Brachyspira;s__Brachyspira sp000431595	27	0	0.000481
GUT_GENOME108992|NODE_404_length_32420_cov_2.70542|4|2	SRR11829261|k141_127994_flag=1_multi=9.0000_len=2328	Pisuviricota	GUT_GENOME141068	d__Bacteria;p__Firmicutes_A;c__Clostridia;o__Lachnospirales;f__Lachnospiraceae;g__Eisenbergiella;s__Eisenbergiella tayi	26	1	0.000518
GUT_GENOME110526|NODE_3841_length_5390_cov_3.14339|2|3	SRR7532745|k141_67301_flag=1_multi=7.0000_len=5564	Kitrinoviricota	GUT_GENOME245758	d__Bacteria;p__Firmicutes_A;c__Clostridia;o__Oscillospirales;f__Ruminococcaceae;g__Ruminiclostridium_E;s__	23	0	0.000333
GUT_GENOME110907|NODE_608_length_44849_cov_5.47526|1|29	SRR11829144|k141_101102_flag=1_multi=49.0000_len=2007	Pisuviricota	GUT_GENOME268399	d__Bacteria;p__Firmicutes_C;c__Negativicutes;o__Acidaminococcales;f__Acidaminococcaceae;g__Phascolarctobacterium;s__Phascolarctobacterium sp000436095	26	1	0.00037
GUT_GENOME113374|NODE_2536_length_13130_cov_3.16857|2|3	SRR11829101|k141_117224_flag=1_multi=26.0000_len=9150	Pisuviricota	GUT_GENOME096096	d__Bacteria;p__Firmicutes_C;c__Negativicutes;o__Veillonellales;f__Veillonellaceae;g__Veillonella;s__Veillonella parvula_A	23	0	0.000629
GUT_GENOME113660|NODE_1598_length_23103_cov_5.18726|1|6	SRR5829905|k141_47893_flag=1_multi=11.0000_len=9243	Pisuviricota	GUT_GENOME143156	d__Bacteria;p__Firmicutes;c__Bacilli;o__Erysipelotrichales;f__Erysipelatoclostridiaceae;g__Erysipelatoclostridium;s__Erysipelatoclostridium sp003024675	28	1	2.57e-05
GUT_GENOME113895|NODE_387_length_51648_cov_3.97347|2|7	SRR11828805|k141_73618_flag=1_multi=13.0000_len=4889	Pisuviricota	GUT_GENOME000237	d__Bacteria;p__Firmicutes_A;c__Clostridia;o__Lachnospirales;f__Lachnospiraceae;g__Lachnospira;s__Lachnospira eligens_B	23	0	0.000333
GUT_GENOME114632|NODE_834_length_34792_cov_4.43043|1|8	SRR11828805|k141_148113_flag=1_multi=3.0000_len=1352	Negarnaviricota	GUT_GENOME265996	d__Bacteria;p__Firmicutes_A;c__Clostridia;o__TANB77;f__CAG-508;g__;s__	23	0	0.000444
GUT_GENOME116099|NODE_3350_length_9763_cov_3.92099|2|9	SRR7004411|k141_34227_flag=1_multi=14.0000_len=5878	Kitrinoviricota	GUT_GENOME093688	d__Bacteria;p__Firmicutes_A;c__Clostridia;o__Oscillospirales;f__Oscillospiraceae;g__CAG-110;s__	27	0	0.000444
GUT_GENOME116772|NODE_277_length_57247_cov_8.52032|1|17	SRR12685793|k141_30602_flag=1_multi=8.0000_len=3803	Lenarviricota	GUT_GENOME172369	d__Bacteria;p__Firmicutes_A;c__Clostridia;o__4C28d-15;f__CAG-917;g__CAG-349;s__CAG-349 sp003539515	26	0	0.001
GUT_GENOME117142|NODE_369_length_53794_cov_37.3675|1|79	SRR11829332|k141_169129_flag=1_multi=13.0000_len=1839	Pisuviricota	GUT_GENOME247421	d__Bacteria;p__Firmicutes_A;c__Clostridia;o__Christensenellales;f__CAG-74;g__UBA11524;s__UBA11524 sp000437595	23	0	0.000444
GUT_GENOME117142|NODE_369_length_53794_cov_37.3675|2|26	SRR11829332|k141_169129_flag=1_multi=13.0000_len=1839	Pisuviricota	GUT_GENOME247421	d__Bacteria;p__Firmicutes_A;c__Clostridia;o__Christensenellales;f__CAG-74;g__UBA11524;s__UBA11524 sp000437595	23	0	0.000444
GUT_GENOME117148|NODE_348_length_42377_cov_5.9143|1|66	SRR11829105|k141_244462_flag=1_multi=21.0000_len=4982	Kitrinoviricota	GUT_GENOME143525	d__Bacteria;p__Firmicutes_A;c__Clostridia;o__Lachnospirales;f__Lachnospiraceae;g__Clostridium_Q;s__Clostridium_Q saccharolyticum	32	1	2.22e-07
GUT_GENOME117148|NODE_348_length_42377_cov_5.9143|1|66	SRR7004412|k141_66391_flag=1_multi=15.0000_len=6156	Pisuviricota	GUT_GENOME143525	d__Bacteria;p__Firmicutes_A;c__Clostridia;o__Lachnospirales;f__Lachnospiraceae;g__Clostridium_Q;s__Clostridium_Q saccharolyticum	26	1	0.000481
GUT_GENOME117148|NODE_348_length_42377_cov_5.9143|1|66	SRR7537439|k141_405326_flag=1_multi=10.0000_len=4774	Lenarviricota	GUT_GENOME143525	d__Bacteria;p__Firmicutes_A;c__Clostridia;o__Lachnospirales;f__Lachnospiraceae;g__Clostridium_Q;s__Clostridium_Q saccharolyticum	23	0	0.000481
GUT_GENOME117148|NODE_348_length_42377_cov_5.9143|1|66	SRR11829001|k141_87679_flag=1_multi=11.0000_len=4663	Unclassified	GUT_GENOME143525	d__Bacteria;p__Firmicutes_A;c__Clostridia;o__Lachnospirales;f__Lachnospiraceae;g__Clostridium_Q;s__Clostridium_Q saccharolyticum	27	1	0.000134
GUT_GENOME117148|NODE_348_length_42377_cov_5.9143|1|66	SRR18771337|k141_14492_flag=1_multi=63.0000_len=9195	Pisuviricota	GUT_GENOME143525	d__Bacteria;p__Firmicutes_A;c__Clostridia;o__Lachnospirales;f__Lachnospiraceae;g__Clostridium_Q;s__Clostridium_Q saccharolyticum	30	1	2.87e-06
GUT_GENOME117148|NODE_348_length_42377_cov_5.9143|1|66	SRR11829144|k141_21356_flag=1_multi=12.0000_len=4379	Unclassified	GUT_GENOME143525	d__Bacteria;p__Firmicutes_A;c__Clostridia;o__Lachnospirales;f__Lachnospiraceae;g__Clostridium_Q;s__Clostridium_Q saccharolyticum	32	2	1.03e-05
GUT_GENOME117148|NODE_348_length_42377_cov_5.9143|1|66	SRR11648176|k141_289439_flag=1_multi=9.0000_len=3612	Pisuviricota	GUT_GENOME143525	d__Bacteria;p__Firmicutes_A;c__Clostridia;o__Lachnospirales;f__Lachnospiraceae;g__Clostridium_Q;s__Clostridium_Q saccharolyticum	27	1	0.000134
GUT_GENOME117148|NODE_348_length_42377_cov_5.9143|1|66	SRR11678561|k141_549_flag=1_multi=16.0000_len=4400	Kitrinoviricota	GUT_GENOME143525	d__Bacteria;p__Firmicutes_A;c__Clostridia;o__Lachnospirales;f__Lachnospiraceae;g__Clostridium_Q;s__Clostridium_Q saccharolyticum	34	1	2.87e-06
GUT_GENOME117148|NODE_348_length_42377_cov_5.9143|1|66	SRR11648176|k141_289439_flag=1_multi=9.0000_len=3612	Pisuviricota	GUT_GENOME143525	d__Bacteria;p__Firmicutes_A;c__Clostridia;o__Lachnospirales;f__Lachnospiraceae;g__Clostridium_Q;s__Clostridium_Q saccharolyticum	27	1	0.000134
GUT_GENOME117148|NODE_348_length_42377_cov_5.9143|1|66	SRR11647857|k141_256089_flag=1_multi=53.7354_len=5197	Kitrinoviricota	GUT_GENOME143525	d__Bacteria;p__Firmicutes_A;c__Clostridia;o__Lachnospirales;f__Lachnospiraceae;g__Clostridium_Q;s__Clostridium_Q saccharolyticum	31	1	0.000134
GUT_GENOME117148|NODE_348_length_42377_cov_5.9143|1|66	SRR14530881|k119_2547_flag=1_multi=49.0000_len=5946	Kitrinoviricota	GUT_GENOME143525	d__Bacteria;p__Firmicutes_A;c__Clostridia;o__Lachnospirales;f__Lachnospiraceae;g__Clostridium_Q;s__Clostridium_Q saccharolyticum	32	1	2.22e-07
GUT_GENOME117148|NODE_348_length_42377_cov_5.9143|1|66	SRR11648412|k141_133622_flag=1_multi=26.0000_len=4827	Kitrinoviricota	GUT_GENOME143525	d__Bacteria;p__Firmicutes_A;c__Clostridia;o__Lachnospirales;f__Lachnospiraceae;g__Clostridium_Q;s__Clostridium_Q saccharolyticum	30	1	2.87e-06
GUT_GENOME117148|NODE_348_length_42377_cov_5.9143|1|66	SRR11649087|k141_26058_flag=1_multi=10.0000_len=4143	Unclassified	GUT_GENOME143525	d__Bacteria;p__Firmicutes_A;c__Clostridia;o__Lachnospirales;f__Lachnospiraceae;g__Clostridium_Q;s__Clostridium_Q saccharolyticum	26	1	0.000481
GUT_GENOME117148|NODE_348_length_42377_cov_5.9143|1|66	SRR11829144|k141_21356_flag=1_multi=12.0000_len=4379	Unclassified	GUT_GENOME143525	d__Bacteria;p__Firmicutes_A;c__Clostridia;o__Lachnospirales;f__Lachnospiraceae;g__Clostridium_Q;s__Clostridium_Q saccharolyticum	32	2	1.03e-05
GUT_GENOME117148|NODE_348_length_42377_cov_5.9143|1|66	SRR5829963|k141_684416_flag=1_multi=32.7821_len=3960	Unclassified	GUT_GENOME143525	d__Bacteria;p__Firmicutes_A;c__Clostridia;o__Lachnospirales;f__Lachnospiraceae;g__Clostridium_Q;s__Clostridium_Q saccharolyticum	32	2	1.03e-05
GUT_GENOME117148|NODE_348_length_42377_cov_5.9143|1|66	SRR12632507|k141_170124_flag=1_multi=18.0000_len=6182	Pisuviricota	GUT_GENOME143525	d__Bacteria;p__Firmicutes_A;c__Clostridia;o__Lachnospirales;f__Lachnospiraceae;g__Clostridium_Q;s__Clostridium_Q saccharolyticum	28	1	3.72e-05
GUT_GENOME117148|NODE_348_length_42377_cov_5.9143|1|66	SRR7539306|k141_99293_flag=0_multi=371.0000_len=2608	Kitrinoviricota	GUT_GENOME143525	d__Bacteria;p__Firmicutes_A;c__Clostridia;o__Lachnospirales;f__Lachnospiraceae;g__Clostridium_Q;s__Clostridium_Q saccharolyticum	26	1	0.000481
GUT_GENOME117148|NODE_348_length_42377_cov_5.9143|1|66	SRR5829904|k141_59302_flag=1_multi=4.0000_len=3072	Kitrinoviricota	GUT_GENOME143525	d__Bacteria;p__Firmicutes_A;c__Clostridia;o__Lachnospirales;f__Lachnospiraceae;g__Clostridium_Q;s__Clostridium_Q saccharolyticum	32	2	1.03e-05
GUT_GENOME117148|NODE_348_length_42377_cov_5.9143|1|66	SRR11828898|k141_83911_flag=1_multi=5.0000_len=2858	Kitrinoviricota	GUT_GENOME143525	d__Bacteria;p__Firmicutes_A;c__Clostridia;o__Lachnospirales;f__Lachnospiraceae;g__Clostridium_Q;s__Clostridium_Q saccharolyticum	32	1	2.22e-07
GUT_GENOME117148|NODE_348_length_42377_cov_5.9143|1|66	SRR11622682|k141_305959_flag=1_multi=5.0000_len=2130	Pisuviricota	GUT_GENOME143525	d__Bacteria;p__Firmicutes_A;c__Clostridia;o__Lachnospirales;f__Lachnospiraceae;g__Clostridium_Q;s__Clostridium_Q saccharolyticum	24	0	0.000134
GUT_GENOME117148|NODE_348_length_42377_cov_5.9143|1|66	SRR11829105|k141_244462_flag=1_multi=21.0000_len=4982	Kitrinoviricota	GUT_GENOME143525	d__Bacteria;p__Firmicutes_A;c__Clostridia;o__Lachnospirales;f__Lachnospiraceae;g__Clostridium_Q;s__Clostridium_Q saccharolyticum	32	1	2.22e-07
GUT_GENOME117764|NODE_2277_length_15611_cov_5.30265|2|14	SRR7004411|k141_34227_flag=1_multi=14.0000_len=5878	Kitrinoviricota	GUT_GENOME093688	d__Bacteria;p__Firmicutes_A;c__Clostridia;o__Oscillospirales;f__Oscillospiraceae;g__CAG-110;s__	27	0	0.000444
GUT_GENOME118157|NODE_50_length_102099_cov_6.01177|1|9	SRR11829144|k141_97467_flag=1_multi=5.0000_len=1605	Pisuviricota	GUT_GENOME000237	d__Bacteria;p__Firmicutes_A;c__Clostridia;o__Lachnospirales;f__Lachnospiraceae;g__Lachnospira;s__Lachnospira eligens_B	26	1	0.000518
GUT_GENOME118259|NODE_84_length_104379_cov_4.27339|3|5	SRR11829144|k141_97467_flag=1_multi=5.0000_len=1605	Pisuviricota	GUT_GENOME000237	d__Bacteria;p__Firmicutes_A;c__Clostridia;o__Lachnospirales;f__Lachnospiraceae;g__Lachnospira;s__Lachnospira eligens_B	26	1	0.000518
GUT_GENOME118583|NODE_169_length_76148_cov_3.80985|1|20	SRR7538189|k141_271754_flag=1_multi=19.0000_len=5196	Kitrinoviricota	GUT_GENOME000136	d__Bacteria;p__Firmicutes_A;c__Clostridia;o__Monoglobales;f__UBA1381;g__CAG-41;s__CAG-41 sp900066215	24	0	0.000113
GUT_GENOME118583|NODE_169_length_76148_cov_3.80985|1|20	BC-0332574726|k141_54544	Duplornaviricota	GUT_GENOME000136	d__Bacteria;p__Firmicutes_A;c__Clostridia;o__Monoglobales;f__UBA1381;g__CAG-41;s__CAG-41 sp900066215	26	1	0.000407
GUT_GENOME118607|NODE_1267_length_21148_cov_2.80709|1|19	BC-0332574726|k141_54544	Duplornaviricota	GUT_GENOME000136	d__Bacteria;p__Firmicutes_A;c__Clostridia;o__Monoglobales;f__UBA1381;g__CAG-41;s__CAG-41 sp900066215	26	1	0.000407
GUT_GENOME118607|NODE_1267_length_21148_cov_2.80709|1|19	SRR7538189|k141_271754_flag=1_multi=19.0000_len=5196	Kitrinoviricota	GUT_GENOME000136	d__Bacteria;p__Firmicutes_A;c__Clostridia;o__Monoglobales;f__UBA1381;g__CAG-41;s__CAG-41 sp900066215	24	0	0.000113
GUT_GENOME118745|NODE_14608_length_2517_cov_2.1381|1|3	SRR11622356|k141_285527_flag=0_multi=41.8805_len=7690	Pisuviricota	GUT_GENOME036763	d__Bacteria;p__Firmicutes_A;c__Clostridia;o__Clostridiales;f__Clostridiaceae;g__Clostridium;s__	26	1	0.000481
GUT_GENOME118857|NODE_327_length_36122_cov_13.5378|3|5	BC-0345321147|k141_61433	Kitrinoviricota	GUT_GENOME000109	d__Bacteria;p__Firmicutes;c__Bacilli;o__Erysipelotrichales;f__Erysipelatoclostridiaceae;g__Catenibacterium;s__Catenibacterium mitsuokai	26	1	0.000444
GUT_GENOME120036|NODE_133_length_97033_cov_5.92937|1|24	SRR12610551|k141_30448_flag=1_multi=4.0000_len=1282	Pisuviricota	GUT_GENOME001354	d__Bacteria;p__Proteobacteria;c__Gammaproteobacteria;o__Burkholderiales;f__Burkholderiaceae;g__Duodenibacillus;s__	26	1	0.00037
GUT_GENOME120036|NODE_133_length_97033_cov_5.92937|1|24	SRR12334072|k141_154640_flag=1_multi=8.1430_len=1672	Pisuviricota	GUT_GENOME001354	d__Bacteria;p__Proteobacteria;c__Gammaproteobacteria;o__Burkholderiales;f__Burkholderiaceae;g__Duodenibacillus;s__	26	1	0.00037
GUT_GENOME120111|NODE_182_length_78534_cov_5.28158|1|24	SRR12610551|k141_30448_flag=1_multi=4.0000_len=1282	Pisuviricota	GUT_GENOME001354	d__Bacteria;p__Proteobacteria;c__Gammaproteobacteria;o__Burkholderiales;f__Burkholderiaceae;g__Duodenibacillus;s__	26	1	0.00037
GUT_GENOME120111|NODE_182_length_78534_cov_5.28158|1|24	SRR12334072|k141_154640_flag=1_multi=8.1430_len=1672	Pisuviricota	GUT_GENOME001354	d__Bacteria;p__Proteobacteria;c__Gammaproteobacteria;o__Burkholderiales;f__Burkholderiaceae;g__Duodenibacillus;s__	26	1	0.00037
GUT_GENOME121048|NODE_1349_length_24385_cov_11.9686|1|11	SRR5208455|k141_249214_flag=1_multi=7.0000_len=2493	Pisuviricota	GUT_GENOME096083	d__Bacteria;p__Bacteroidota;c__Bacteroidia;o__Bacteroidales;f__Bacteroidaceae;g__Bacteroides;s__Bacteroides uniformis	26	1	0.000296
GUT_GENOME121453|NODE_109_length_111866_cov_9.68445|1|4	SRR7534623|k141_53445_flag=1_multi=56.0000_len=6647	Pisuviricota	GUT_GENOME148897	d__Bacteria;p__Bacteroidota;c__Bacteroidia;o__Bacteroidales;f__Muribaculaceae;g__CAG-279;s__CAG-279 sp000437795	23	0	0.000296
GUT_GENOME121967|NODE_596_length_47947_cov_9.43268|2|25	SRR11828806|k141_188155_flag=1_multi=64.0000_len=6887	Pisuviricota	GUT_GENOME176098	d__Bacteria;p__Firmicutes_A;c__Clostridia;o__Oscillospirales;f__Oscillospiraceae;g__CAG-83;s__CAG-83 sp000435975	26	1	0.000444
GUT_GENOME122276|NODE_227_length_65175_cov_6.4766|1|32	SRR11450579|k141_225818_flag=1_multi=84.0000_len=9187	Pisuviricota	GUT_GENOME239684	d__Bacteria;p__Firmicutes_A;c__Clostridia;o__Oscillospirales;f__Oscillospiraceae;g__ER4;s__ER4 sp000765235	26	1	0.000444
GUT_GENOME123048|NODE_56_length_80659_cov_21.2855|1|5	SRR11647877|k141_50820_flag=1_multi=18.0000_len=6336	urv.p.001	GUT_GENOME000237	d__Bacteria;p__Firmicutes_A;c__Clostridia;o__Lachnospirales;f__Lachnospiraceae;g__Lachnospira;s__Lachnospira eligens_B	30	1	0.000296
GUT_GENOME123176|NODE_10_length_96889_cov_391.136|1|3	SRR11622354|k141_452949_flag=1_multi=25.0000_len=3833	Lenarviricota	GUT_GENOME140299	d__Bacteria;p__Bacteroidota;c__Bacteroidia;o__Bacteroidales;f__Bacteroidaceae;g__Prevotella;s__Prevotella copri	22	0	0.001
GUT_GENOME123246|NODE_37_length_57733_cov_613.698|1|23	BC-0361082863|k141_38348	Pisuviricota	GUT_GENOME140299	d__Bacteria;p__Bacteroidota;c__Bacteroidia;o__Bacteroidales;f__Bacteroidaceae;g__Prevotella;s__Prevotella copri	23	0	0.000518
GUT_GENOME123594|NODE_1621_length_13045_cov_75.225|1|3	SRR11622354|k141_452949_flag=1_multi=25.0000_len=3833	Lenarviricota	GUT_GENOME140299	d__Bacteria;p__Bacteroidota;c__Bacteroidia;o__Bacteroidales;f__Bacteroidaceae;g__Prevotella;s__Prevotella copri	22	0	0.001
GUT_GENOME124317|NODE_112_length_76828_cov_271.187|1|1	SRR7540567|k141_206502_flag=1_multi=10.0000_len=3826	Pisuviricota	GUT_GENOME124317	d__Bacteria;p__Bacteroidota;c__Bacteroidia;o__Bacteroidales;f__Bacteroidaceae;g__Prevotella;s__	26	1	0.000444
GUT_GENOME128176|NODE_69_length_86689_cov_74.0839|2|1	SRR18770931|k141_144705_flag=1_multi=31.0000_len=11501	Pisuviricota	GUT_GENOME018576	d__Bacteria;p__Bacteroidota;c__Bacteroidia;o__Bacteroidales;f__UBA932;g__RC9;s__RC9 sp000433355	28	0	9.26e-05
GUT_GENOME129219|NODE_157_length_86183_cov_60.0615|1|10	SRR18770931|k141_144705_flag=1_multi=31.0000_len=11501	Pisuviricota	GUT_GENOME018576	d__Bacteria;p__Bacteroidota;c__Bacteroidia;o__Bacteroidales;f__UBA932;g__RC9;s__RC9 sp000433355	28	0	9.26e-05
GUT_GENOME129274|NODE_99_length_38134_cov_25.7538|1|17	SRR5208545|k141_119360_flag=1_multi=9.0000_len=6907	Pisuviricota	GUT_GENOME266586	d__Bacteria;p__Firmicutes_A;c__Clostridia;o__Oscillospirales;f__Acutalibacteraceae;g__CAG-180;s__CAG-180 sp000432435	22	0	0.001
GUT_GENOME129560|NODE_1935_length_14063_cov_35.5825|1|8	SRR10849655|k141_423904_flag=1_multi=101.0000_len=1253	Pisuviricota	GUT_GENOME023798	d__Bacteria;p__Bacteroidota;c__Bacteroidia;o__Bacteroidales;f__Bacteroidaceae;g__Prevotellamassilia;s__	30	0	1.09e-07
GUT_GENOME129560|NODE_1935_length_14063_cov_35.5825|1|8	SRR11648360|k141_159593_flag=1_multi=178.0173_len=2277	Lenarviricota	GUT_GENOME023798	d__Bacteria;p__Bacteroidota;c__Bacteroidia;o__Bacteroidales;f__Bacteroidaceae;g__Prevotellamassilia;s__	33	0	2.35e-09
GUT_GENOME129560|NODE_1935_length_14063_cov_35.5825|1|8	SRR17497051|k141_207887_flag=1_multi=115.0000_len=4255	Lenarviricota	GUT_GENOME023798	d__Bacteria;p__Bacteroidota;c__Bacteroidia;o__Bacteroidales;f__Bacteroidaceae;g__Prevotellamassilia;s__	35	1	8.45e-09
GUT_GENOME129560|NODE_1935_length_14063_cov_35.5825|1|8	SRR10849655|k141_168277_flag=1_multi=29.8447_len=4248	Lenarviricota	GUT_GENOME023798	d__Bacteria;p__Bacteroidota;c__Bacteroidia;o__Bacteroidales;f__Bacteroidaceae;g__Prevotellamassilia;s__	30	0	1.09e-07
GUT_GENOME129560|NODE_1935_length_14063_cov_35.5825|1|8	SRR11450579|k141_110565_flag=1_multi=48.0000_len=6081	Pisuviricota	GUT_GENOME023798	d__Bacteria;p__Bacteroidota;c__Bacteroidia;o__Bacteroidales;f__Bacteroidaceae;g__Prevotellamassilia;s__	30	0	1.09e-07
GUT_GENOME129560|NODE_1935_length_14063_cov_35.5825|1|8	SRR11829143|k141_153826_flag=1_multi=74.0000_len=3180	Pisuviricota	GUT_GENOME023798	d__Bacteria;p__Bacteroidota;c__Bacteroidia;o__Bacteroidales;f__Bacteroidaceae;g__Prevotellamassilia;s__	33	1	1.09e-07
GUT_GENOME129560|NODE_1935_length_14063_cov_35.5825|1|8	SRR10849744|k141_401757_flag=1_multi=29.0000_len=2682	Lenarviricota	GUT_GENOME023798	d__Bacteria;p__Bacteroidota;c__Bacteroidia;o__Bacteroidales;f__Bacteroidaceae;g__Prevotellamassilia;s__	37	1	1.09e-07
GUT_GENOME129560|NODE_1935_length_14063_cov_35.5825|1|8	SRR12685052|k141_79459_flag=1_multi=739.0000_len=9951	Pisuviricota	GUT_GENOME023798	d__Bacteria;p__Bacteroidota;c__Bacteroidia;o__Bacteroidales;f__Bacteroidaceae;g__Prevotellamassilia;s__	31	0	3.04e-08
GUT_GENOME129560|NODE_1935_length_14063_cov_35.5825|1|8	SRR11076227|k141_824470_flag=1_multi=26.0000_len=2023	Lenarviricota	GUT_GENOME023798	d__Bacteria;p__Bacteroidota;c__Bacteroidia;o__Bacteroidales;f__Bacteroidaceae;g__Prevotellamassilia;s__	31	0	3.04e-08
GUT_GENOME129560|NODE_1935_length_14063_cov_35.5825|1|8	SRR11450577|k141_46435_flag=1_multi=20.0000_len=6240	Pisuviricota	GUT_GENOME023798	d__Bacteria;p__Bacteroidota;c__Bacteroidia;o__Bacteroidales;f__Bacteroidaceae;g__Prevotellamassilia;s__	30	0	1.09e-07
GUT_GENOME129560|NODE_1935_length_14063_cov_35.5825|1|8	SRR18770931|k141_53716_flag=1_multi=6.0000_len=1000	Lenarviricota	GUT_GENOME023798	d__Bacteria;p__Bacteroidota;c__Bacteroidia;o__Bacteroidales;f__Bacteroidaceae;g__Prevotellamassilia;s__	31	0	3.04e-08
GUT_GENOME129560|NODE_1935_length_14063_cov_35.5825|1|8	SRR18770918|k141_62844_flag=1_multi=22.0000_len=3755	Lenarviricota	GUT_GENOME023798	d__Bacteria;p__Bacteroidota;c__Bacteroidia;o__Bacteroidales;f__Bacteroidaceae;g__Prevotellamassilia;s__	34	1	3.04e-08
GUT_GENOME129560|NODE_1935_length_14063_cov_35.5825|1|8	SRR8549881|k141_3835_flag=1_multi=10.0000_len=3726	Lenarviricota	GUT_GENOME023798	d__Bacteria;p__Bacteroidota;c__Bacteroidia;o__Bacteroidales;f__Bacteroidaceae;g__Prevotellamassilia;s__	33	1	1.09e-07
GUT_GENOME129560|NODE_1935_length_14063_cov_35.5825|1|8	SRR18770918|k141_30532_flag=1_multi=88.0000_len=4400	Kitrinoviricota	GUT_GENOME023798	d__Bacteria;p__Bacteroidota;c__Bacteroidia;o__Bacteroidales;f__Bacteroidaceae;g__Prevotellamassilia;s__	30	0	1.09e-07
GUT_GENOME129560|NODE_1935_length_14063_cov_35.5825|1|8	SRR11622354|k141_212043_flag=1_multi=2135.0000_len=9192	Pisuviricota	GUT_GENOME023798	d__Bacteria;p__Bacteroidota;c__Bacteroidia;o__Bacteroidales;f__Bacteroidaceae;g__Prevotellamassilia;s__	30	0	1.09e-07
GUT_GENOME129560|NODE_1935_length_14063_cov_35.5825|1|8	SRR10849941|k141_359276_flag=1_multi=6.0000_len=3131	Lenarviricota	GUT_GENOME023798	d__Bacteria;p__Bacteroidota;c__Bacteroidia;o__Bacteroidales;f__Bacteroidaceae;g__Prevotellamassilia;s__	30	0	1.09e-07
GUT_GENOME129560|NODE_1935_length_14063_cov_35.5825|1|8	SRR11076227|k141_454662_flag=1_multi=887.0000_len=3729	Negarnaviricota	GUT_GENOME023798	d__Bacteria;p__Bacteroidota;c__Bacteroidia;o__Bacteroidales;f__Bacteroidaceae;g__Prevotellamassilia;s__	31	0	3.04e-08
GUT_GENOME129560|NODE_1935_length_14063_cov_35.5825|1|8	SRR11450579|k141_110795_flag=1_multi=19.0000_len=3574	Lenarviricota	GUT_GENOME023798	d__Bacteria;p__Bacteroidota;c__Bacteroidia;o__Bacteroidales;f__Bacteroidaceae;g__Prevotellamassilia;s__	41	1	3.9e-12
GUT_GENOME129560|NODE_1935_length_14063_cov_35.5825|1|8	SRR7535303|k141_145359_flag=1_multi=385.0000_len=2683	Kitrinoviricota	GUT_GENOME023798	d__Bacteria;p__Bacteroidota;c__Bacteroidia;o__Bacteroidales;f__Bacteroidaceae;g__Prevotellamassilia;s__	31	0	3.04e-08
GUT_GENOME129560|NODE_1935_length_14063_cov_35.5825|1|8	SRR11828897|k141_82630_flag=1_multi=4.0000_len=1138	Duplornaviricota	GUT_GENOME023798	d__Bacteria;p__Bacteroidota;c__Bacteroidia;o__Bacteroidales;f__Bacteroidaceae;g__Prevotellamassilia;s__	30	0	1.09e-07
GUT_GENOME129560|NODE_1935_length_14063_cov_35.5825|1|8	SRR18771403|k141_43663_flag=1_multi=5.0000_len=2184	Unclassified	GUT_GENOME023798	d__Bacteria;p__Bacteroidota;c__Bacteroidia;o__Bacteroidales;f__Bacteroidaceae;g__Prevotellamassilia;s__	30	0	1.09e-07
GUT_GENOME129560|NODE_1935_length_14063_cov_35.5825|1|8	SRR7541460|k141_22884_flag=1_multi=10.0000_len=1654	Lenarviricota	GUT_GENOME023798	d__Bacteria;p__Bacteroidota;c__Bacteroidia;o__Bacteroidales;f__Bacteroidaceae;g__Prevotellamassilia;s__	30	0	1.09e-07
GUT_GENOME129560|NODE_1935_length_14063_cov_35.5825|1|8	SRR12685792|k141_34008_flag=1_multi=35.0000_len=2829	Lenarviricota	GUT_GENOME023798	d__Bacteria;p__Bacteroidota;c__Bacteroidia;o__Bacteroidales;f__Bacteroidaceae;g__Prevotellamassilia;s__	32	0	8.45e-09
GUT_GENOME129560|NODE_1935_length_14063_cov_35.5825|1|8	SRR11648176|k141_193398_flag=1_multi=116.0000_len=2328	Lenarviricota	GUT_GENOME023798	d__Bacteria;p__Bacteroidota;c__Bacteroidia;o__Bacteroidales;f__Bacteroidaceae;g__Prevotellamassilia;s__	30	0	1.09e-07
GUT_GENOME129560|NODE_1935_length_14063_cov_35.5825|1|8	SRR10849941|k141_116639_flag=1_multi=33.0000_len=4060	Lenarviricota	GUT_GENOME023798	d__Bacteria;p__Bacteroidota;c__Bacteroidia;o__Bacteroidales;f__Bacteroidaceae;g__Prevotellamassilia;s__	31	0	3.04e-08
GUT_GENOME129560|NODE_1935_length_14063_cov_35.5825|1|8	SRR5829932|k141_259122_flag=1_multi=161.0000_len=2412	Pisuviricota	GUT_GENOME023798	d__Bacteria;p__Bacteroidota;c__Bacteroidia;o__Bacteroidales;f__Bacteroidaceae;g__Prevotellamassilia;s__	31	0	3.04e-08
GUT_GENOME129560|NODE_1935_length_14063_cov_35.5825|1|8	SRR11829144|k141_83972_flag=1_multi=7.0000_len=2158	Lenarviricota	GUT_GENOME023798	d__Bacteria;p__Bacteroidota;c__Bacteroidia;o__Bacteroidales;f__Bacteroidaceae;g__Prevotellamassilia;s__	31	0	3.04e-08
GUT_GENOME129560|NODE_1935_length_14063_cov_35.5825|1|8	SRR11450579|k141_100708_flag=1_multi=180.0000_len=3605	Kitrinoviricota	GUT_GENOME023798	d__Bacteria;p__Bacteroidota;c__Bacteroidia;o__Bacteroidales;f__Bacteroidaceae;g__Prevotellamassilia;s__	30	0	1.09e-07
GUT_GENOME129560|NODE_1935_length_14063_cov_35.5825|1|8	SRR11829144|k141_92653_flag=1_multi=10.0000_len=2475	Lenarviricota	GUT_GENOME023798	d__Bacteria;p__Bacteroidota;c__Bacteroidia;o__Bacteroidales;f__Bacteroidaceae;g__Prevotellamassilia;s__	33	1	1.09e-07
GUT_GENOME129560|NODE_1935_length_14063_cov_35.5825|1|8	SRR11450579|k141_102904_flag=1_multi=14.0000_len=3549	Lenarviricota	GUT_GENOME023798	d__Bacteria;p__Bacteroidota;c__Bacteroidia;o__Bacteroidales;f__Bacteroidaceae;g__Prevotellamassilia;s__	31	0	3.04e-08
GUT_GENOME129560|NODE_1935_length_14063_cov_35.5825|1|8	SRR12685025|k141_160631_flag=1_multi=34.0000_len=8915	Pisuviricota	GUT_GENOME023798	d__Bacteria;p__Bacteroidota;c__Bacteroidia;o__Bacteroidales;f__Bacteroidaceae;g__Prevotellamassilia;s__	31	0	3.04e-08
GUT_GENOME129560|NODE_1935_length_14063_cov_35.5825|1|8	SRR11450579|k141_104060_flag=1_multi=15.8839_len=4793	Pisuviricota	GUT_GENOME023798	d__Bacteria;p__Bacteroidota;c__Bacteroidia;o__Bacteroidales;f__Bacteroidaceae;g__Prevotellamassilia;s__	30	0	1.09e-07
GUT_GENOME129560|NODE_1935_length_14063_cov_35.5825|1|8	SRR12685792|k141_37829_flag=0_multi=6.0000_len=3969	Lenarviricota	GUT_GENOME023798	d__Bacteria;p__Bacteroidota;c__Bacteroidia;o__Bacteroidales;f__Bacteroidaceae;g__Prevotellamassilia;s__	31	0	3.04e-08
GUT_GENOME129560|NODE_1935_length_14063_cov_35.5825|1|8	SRR11829101|k141_13299_flag=1_multi=193.0000_len=3822	Lenarviricota	GUT_GENOME023798	d__Bacteria;p__Bacteroidota;c__Bacteroidia;o__Bacteroidales;f__Bacteroidaceae;g__Prevotellamassilia;s__	32	0	8.45e-09
GUT_GENOME129560|NODE_1935_length_14063_cov_35.5825|1|8	SRR5829939|k141_13616_flag=1_multi=116.0000_len=1958	Pisuviricota	GUT_GENOME023798	d__Bacteria;p__Bacteroidota;c__Bacteroidia;o__Bacteroidales;f__Bacteroidaceae;g__Prevotellamassilia;s__	30	0	1.09e-07
GUT_GENOME129560|NODE_1935_length_14063_cov_35.5825|1|8	SRR11450580|k141_162751_flag=1_multi=21.0000_len=2339	Pisuviricota	GUT_GENOME023798	d__Bacteria;p__Bacteroidota;c__Bacteroidia;o__Bacteroidales;f__Bacteroidaceae;g__Prevotellamassilia;s__	31	0	3.04e-08
GUT_GENOME129560|NODE_1935_length_14063_cov_35.5825|1|8	SRR5468102|k141_11547_flag=1_multi=31.0000_len=2286	Pisuviricota	GUT_GENOME023798	d__Bacteria;p__Bacteroidota;c__Bacteroidia;o__Bacteroidales;f__Bacteroidaceae;g__Prevotellamassilia;s__	30	0	1.09e-07
GUT_GENOME129560|NODE_1935_length_14063_cov_35.5825|1|8	SRR7004412|k141_136374_flag=1_multi=17.0000_len=5679	Unclassified	GUT_GENOME023798	d__Bacteria;p__Bacteroidota;c__Bacteroidia;o__Bacteroidales;f__Bacteroidaceae;g__Prevotellamassilia;s__	40	1	1.4e-11
GUT_GENOME129560|NODE_1935_length_14063_cov_35.5825|1|8	SRR11829144|k141_96665_flag=1_multi=10.0000_len=4356	Pisuviricota	GUT_GENOME023798	d__Bacteria;p__Bacteroidota;c__Bacteroidia;o__Bacteroidales;f__Bacteroidaceae;g__Prevotellamassilia;s__	30	0	1.09e-07
GUT_GENOME129560|NODE_1935_length_14063_cov_35.5825|1|8	SRR11829261|k141_77084_flag=1_multi=9.0000_len=1763	Pisuviricota	GUT_GENOME023798	d__Bacteria;p__Bacteroidota;c__Bacteroidia;o__Bacteroidales;f__Bacteroidaceae;g__Prevotellamassilia;s__	33	0	2.35e-09
GUT_GENOME129560|NODE_1935_length_14063_cov_35.5825|1|8	SRR11450579|k141_147105_flag=1_multi=25.0000_len=3458	Lenarviricota	GUT_GENOME023798	d__Bacteria;p__Bacteroidota;c__Bacteroidia;o__Bacteroidales;f__Bacteroidaceae;g__Prevotellamassilia;s__	34	1	3.04e-08
GUT_GENOME129560|NODE_1935_length_14063_cov_35.5825|1|8	SRR11450578|k141_5774_flag=1_multi=38.0000_len=2333	Pisuviricota	GUT_GENOME023798	d__Bacteria;p__Bacteroidota;c__Bacteroidia;o__Bacteroidales;f__Bacteroidaceae;g__Prevotellamassilia;s__	35	1	8.45e-09
GUT_GENOME129560|NODE_1935_length_14063_cov_35.5825|1|8	SRR12685793|k141_115161_flag=1_multi=585.0288_len=9062	Pisuviricota	GUT_GENOME023798	d__Bacteria;p__Bacteroidota;c__Bacteroidia;o__Bacteroidales;f__Bacteroidaceae;g__Prevotellamassilia;s__	31	0	3.04e-08
GUT_GENOME129560|NODE_1935_length_14063_cov_35.5825|1|8	SRR11450585|k141_378665_flag=1_multi=152.0000_len=5499	Kitrinoviricota	GUT_GENOME023798	d__Bacteria;p__Bacteroidota;c__Bacteroidia;o__Bacteroidales;f__Bacteroidaceae;g__Prevotellamassilia;s__	30	0	1.09e-07
GUT_GENOME129560|NODE_1935_length_14063_cov_35.5825|1|8	SRR17497116|k141_62564_flag=1_multi=9775.8178_len=1535	Lenarviricota	GUT_GENOME023798	d__Bacteria;p__Bacteroidota;c__Bacteroidia;o__Bacteroidales;f__Bacteroidaceae;g__Prevotellamassilia;s__	33	1	1.09e-07
GUT_GENOME129560|NODE_1935_length_14063_cov_35.5825|1|8	SRR11829001|k141_57322_flag=1_multi=174.0000_len=4191	Kitrinoviricota	GUT_GENOME023798	d__Bacteria;p__Bacteroidota;c__Bacteroidia;o__Bacteroidales;f__Bacteroidaceae;g__Prevotellamassilia;s__	30	0	1.09e-07
GUT_GENOME129560|NODE_1935_length_14063_cov_35.5825|1|8	SRR17481195|k141_80623_flag=1_multi=1418.9263_len=15072	Negarnaviricota	GUT_GENOME023798	d__Bacteria;p__Bacteroidota;c__Bacteroidia;o__Bacteroidales;f__Bacteroidaceae;g__Prevotellamassilia;s__	35	0	3.04e-08
GUT_GENOME129560|NODE_1935_length_14063_cov_35.5825|1|8	SRR7535022|k141_118816_flag=1_multi=732.0000_len=2657	Lenarviricota	GUT_GENOME023798	d__Bacteria;p__Bacteroidota;c__Bacteroidia;o__Bacteroidales;f__Bacteroidaceae;g__Prevotellamassilia;s__	30	0	1.09e-07
GUT_GENOME129560|NODE_1935_length_14063_cov_35.5825|1|8	SRR11829101|k141_130340_flag=1_multi=146.0000_len=4048	Lenarviricota	GUT_GENOME023798	d__Bacteria;p__Bacteroidota;c__Bacteroidia;o__Bacteroidales;f__Bacteroidaceae;g__Prevotellamassilia;s__	31	0	3.04e-08
GUT_GENOME129560|NODE_1935_length_14063_cov_35.5825|1|8	SRR17497098|k141_54453_flag=1_multi=11.0000_len=5349	Duplornaviricota	GUT_GENOME023798	d__Bacteria;p__Bacteroidota;c__Bacteroidia;o__Bacteroidales;f__Bacteroidaceae;g__Prevotellamassilia;s__	33	1	1.09e-07
GUT_GENOME129560|NODE_1935_length_14063_cov_35.5825|1|8	SRR11828805|k141_30194_flag=1_multi=19.6484_len=3781	Unclassified	GUT_GENOME023798	d__Bacteria;p__Bacteroidota;c__Bacteroidia;o__Bacteroidales;f__Bacteroidaceae;g__Prevotellamassilia;s__	33	1	1.09e-07
GUT_GENOME129560|NODE_1935_length_14063_cov_35.5825|1|8	SRR11450579|k141_124288_flag=1_multi=56.0000_len=3738	Lenarviricota	GUT_GENOME023798	d__Bacteria;p__Bacteroidota;c__Bacteroidia;o__Bacteroidales;f__Bacteroidaceae;g__Prevotellamassilia;s__	30	0	1.09e-07
GUT_GENOME129560|NODE_1935_length_14063_cov_35.5825|1|8	SRR12658570|k141_459806_flag=1_multi=61.3731_len=3060	Kitrinoviricota	GUT_GENOME023798	d__Bacteria;p__Bacteroidota;c__Bacteroidia;o__Bacteroidales;f__Bacteroidaceae;g__Prevotellamassilia;s__	30	0	1.09e-07
GUT_GENOME129560|NODE_1935_length_14063_cov_35.5825|1|8	SRR11829261|k141_53517_flag=0_multi=33.0000_len=3166	Kitrinoviricota	GUT_GENOME023798	d__Bacteria;p__Bacteroidota;c__Bacteroidia;o__Bacteroidales;f__Bacteroidaceae;g__Prevotellamassilia;s__	32	0	8.45e-09
GUT_GENOME129560|NODE_1935_length_14063_cov_35.5825|1|8	SRR11450579|k141_3943_flag=1_multi=7.0000_len=1679	Lenarviricota	GUT_GENOME023798	d__Bacteria;p__Bacteroidota;c__Bacteroidia;o__Bacteroidales;f__Bacteroidaceae;g__Prevotellamassilia;s__	45	1	3.9e-12
GUT_GENOME129560|NODE_1935_length_14063_cov_35.5825|1|8	SRR11450579|k141_41310_flag=1_multi=17.0000_len=2149	Pisuviricota	GUT_GENOME023798	d__Bacteria;p__Bacteroidota;c__Bacteroidia;o__Bacteroidales;f__Bacteroidaceae;g__Prevotellamassilia;s__	37	1	6.53e-10
GUT_GENOME129560|NODE_1935_length_14063_cov_35.5825|1|8	SRR11450579|k141_100708_flag=1_multi=180.0000_len=3605	Kitrinoviricota	GUT_GENOME023798	d__Bacteria;p__Bacteroidota;c__Bacteroidia;o__Bacteroidales;f__Bacteroidaceae;g__Prevotellamassilia;s__	30	0	1.09e-07
GUT_GENOME129560|NODE_1935_length_14063_cov_35.5825|1|8	SRR11075871|k141_496447_flag=1_multi=12.0000_len=3999	Lenarviricota	GUT_GENOME023798	d__Bacteria;p__Bacteroidota;c__Bacteroidia;o__Bacteroidales;f__Bacteroidaceae;g__Prevotellamassilia;s__	33	1	1.09e-07
GUT_GENOME129560|NODE_1935_length_14063_cov_35.5825|1|8	SRR7535021|k141_107657_flag=1_multi=103.0000_len=4283	Lenarviricota	GUT_GENOME023798	d__Bacteria;p__Bacteroidota;c__Bacteroidia;o__Bacteroidales;f__Bacteroidaceae;g__Prevotellamassilia;s__	34	0	6.53e-10
GUT_GENOME129560|NODE_1935_length_14063_cov_35.5825|1|8	SRR11829105|k141_339493_flag=1_multi=40.0000_len=4741	Unclassified	GUT_GENOME023798	d__Bacteria;p__Bacteroidota;c__Bacteroidia;o__Bacteroidales;f__Bacteroidaceae;g__Prevotellamassilia;s__	30	0	1.09e-07
GUT_GENOME129560|NODE_1935_length_14063_cov_35.5825|1|8	SRR10849649|k141_151968_flag=1_multi=3.0000_len=1318	Lenarviricota	GUT_GENOME023798	d__Bacteria;p__Bacteroidota;c__Bacteroidia;o__Bacteroidales;f__Bacteroidaceae;g__Prevotellamassilia;s__	31	0	3.04e-08
GUT_GENOME129560|NODE_1935_length_14063_cov_35.5825|1|8	SRR11829103|k141_185390_flag=1_multi=11.0193_len=1589	Lenarviricota	GUT_GENOME023798	d__Bacteria;p__Bacteroidota;c__Bacteroidia;o__Bacteroidales;f__Bacteroidaceae;g__Prevotellamassilia;s__	31	0	3.04e-08
GUT_GENOME129560|NODE_1935_length_14063_cov_35.5825|1|8	SRR11450580|k141_303535_flag=1_multi=23.0000_len=4348	Unclassified	GUT_GENOME023798	d__Bacteria;p__Bacteroidota;c__Bacteroidia;o__Bacteroidales;f__Bacteroidaceae;g__Prevotellamassilia;s__	30	0	1.09e-07
GUT_GENOME129560|NODE_1935_length_14063_cov_35.5825|1|8	SRR11450580|k141_282264_flag=1_multi=51.0000_len=3629	Kitrinoviricota	GUT_GENOME023798	d__Bacteria;p__Bacteroidota;c__Bacteroidia;o__Bacteroidales;f__Bacteroidaceae;g__Prevotellamassilia;s__	35	1	8.45e-09
GUT_GENOME129560|NODE_1935_length_14063_cov_35.5825|1|8	SRR11828805|k141_301719_flag=1_multi=8.9312_len=3630	Lenarviricota	GUT_GENOME023798	d__Bacteria;p__Bacteroidota;c__Bacteroidia;o__Bacteroidales;f__Bacteroidaceae;g__Prevotellamassilia;s__	30	0	1.09e-07
GUT_GENOME129560|NODE_1935_length_14063_cov_35.5825|1|8	SRR11622286|k141_248622_flag=1_multi=84.0000_len=3748	Lenarviricota	GUT_GENOME023798	d__Bacteria;p__Bacteroidota;c__Bacteroidia;o__Bacteroidales;f__Bacteroidaceae;g__Prevotellamassilia;s__	31	0	3.04e-08
GUT_GENOME129560|NODE_1935_length_14063_cov_35.5825|1|8	SRR11450578|k141_101302_flag=1_multi=110.0000_len=2828	Kitrinoviricota	GUT_GENOME023798	d__Bacteria;p__Bacteroidota;c__Bacteroidia;o__Bacteroidales;f__Bacteroidaceae;g__Prevotellamassilia;s__	32	0	8.45e-09
GUT_GENOME129560|NODE_1935_length_14063_cov_35.5825|1|8	SRR11828959|k141_35438_flag=1_multi=5.0000_len=1806	Lenarviricota	GUT_GENOME023798	d__Bacteria;p__Bacteroidota;c__Bacteroidia;o__Bacteroidales;f__Bacteroidaceae;g__Prevotellamassilia;s__	30	0	1.09e-07
GUT_GENOME129560|NODE_1935_length_14063_cov_35.5825|1|8	SRR12658570|k141_81521_flag=1_multi=33.0000_len=3737	Lenarviricota	GUT_GENOME023798	d__Bacteria;p__Bacteroidota;c__Bacteroidia;o__Bacteroidales;f__Bacteroidaceae;g__Prevotellamassilia;s__	32	0	8.45e-09
GUT_GENOME129560|NODE_1935_length_14063_cov_35.5825|1|8	SRR11450580|k141_196307_flag=1_multi=60.0000_len=4695	Kitrinoviricota	GUT_GENOME023798	d__Bacteria;p__Bacteroidota;c__Bacteroidia;o__Bacteroidales;f__Bacteroidaceae;g__Prevotellamassilia;s__	32	0	8.45e-09
GUT_GENOME129560|NODE_1935_length_14063_cov_35.5825|1|8	SRR11450580|k141_257909_flag=1_multi=93.0000_len=4022	Kitrinoviricota	GUT_GENOME023798	d__Bacteria;p__Bacteroidota;c__Bacteroidia;o__Bacteroidales;f__Bacteroidaceae;g__Prevotellamassilia;s__	31	0	3.04e-08
GUT_GENOME129560|NODE_1935_length_14063_cov_35.5825|1|8	SRR11450580|k141_254540_flag=1_multi=32.0000_len=3827	Lenarviricota	GUT_GENOME023798	d__Bacteria;p__Bacteroidota;c__Bacteroidia;o__Bacteroidales;f__Bacteroidaceae;g__Prevotellamassilia;s__	31	0	3.04e-08
GUT_GENOME129560|NODE_1935_length_14063_cov_35.5825|1|8	SRR5829938|k141_135938_flag=1_multi=41.0000_len=3000	Kitrinoviricota	GUT_GENOME023798	d__Bacteria;p__Bacteroidota;c__Bacteroidia;o__Bacteroidales;f__Bacteroidaceae;g__Prevotellamassilia;s__	34	1	3.04e-08
GUT_GENOME129560|NODE_1935_length_14063_cov_35.5825|1|8	SRR7004411|k141_139342_flag=1_multi=14.0000_len=1481	Lenarviricota	GUT_GENOME023798	d__Bacteria;p__Bacteroidota;c__Bacteroidia;o__Bacteroidales;f__Bacteroidaceae;g__Prevotellamassilia;s__	31	0	3.04e-08
GUT_GENOME129560|NODE_1935_length_14063_cov_35.5825|1|8	SRR7004411|k141_150489_flag=0_multi=29.9172_len=7849	Pisuviricota	GUT_GENOME023798	d__Bacteria;p__Bacteroidota;c__Bacteroidia;o__Bacteroidales;f__Bacteroidaceae;g__Prevotellamassilia;s__	30	0	1.09e-07
GUT_GENOME129560|NODE_1935_length_14063_cov_35.5825|1|8	SRR11828902|k141_39122_flag=1_multi=13.0000_len=4313	Unclassified	GUT_GENOME023798	d__Bacteria;p__Bacteroidota;c__Bacteroidia;o__Bacteroidales;f__Bacteroidaceae;g__Prevotellamassilia;s__	33	1	1.09e-07
GUT_GENOME129560|NODE_1935_length_14063_cov_35.5825|1|8	SRR11450586|k141_262936_flag=1_multi=7.0000_len=2557	Pisuviricota	GUT_GENOME023798	d__Bacteria;p__Bacteroidota;c__Bacteroidia;o__Bacteroidales;f__Bacteroidaceae;g__Prevotellamassilia;s__	30	0	1.09e-07
GUT_GENOME129560|NODE_1935_length_14063_cov_35.5825|1|8	BC-0345318772|k141_19025	Duplornaviricota	GUT_GENOME023798	d__Bacteria;p__Bacteroidota;c__Bacteroidia;o__Bacteroidales;f__Bacteroidaceae;g__Prevotellamassilia;s__	37	1	6.53e-10
GUT_GENOME129560|NODE_1935_length_14063_cov_35.5825|1|8	SRR12685793|k141_74745_flag=1_multi=10.0000_len=4509	Lenarviricota	GUT_GENOME023798	d__Bacteria;p__Bacteroidota;c__Bacteroidia;o__Bacteroidales;f__Bacteroidaceae;g__Prevotellamassilia;s__	30	0	1.09e-07
GUT_GENOME129560|NODE_1935_length_14063_cov_35.5825|1|8	SRR11828806|k141_72936_flag=1_multi=5.0000_len=2004	Pisuviricota	GUT_GENOME023798	d__Bacteria;p__Bacteroidota;c__Bacteroidia;o__Bacteroidales;f__Bacteroidaceae;g__Prevotellamassilia;s__	30	0	1.09e-07
GUT_GENOME129560|NODE_1935_length_14063_cov_35.5825|1|8	SRR11450579|k141_136954_flag=1_multi=11.0000_len=2088	Pisuviricota	GUT_GENOME023798	d__Bacteria;p__Bacteroidota;c__Bacteroidia;o__Bacteroidales;f__Bacteroidaceae;g__Prevotellamassilia;s__	31	0	3.04e-08
GUT_GENOME129560|NODE_1935_length_14063_cov_35.5825|1|8	SRR11450579|k141_84992_flag=1_multi=8.0000_len=1336	Pisuviricota	GUT_GENOME023798	d__Bacteria;p__Bacteroidota;c__Bacteroidia;o__Bacteroidales;f__Bacteroidaceae;g__Prevotellamassilia;s__	33	0	2.35e-09
GUT_GENOME129560|NODE_1935_length_14063_cov_35.5825|1|8	SRR11828993|k141_213373_flag=1_multi=8.0000_len=1933	Lenarviricota	GUT_GENOME023798	d__Bacteria;p__Bacteroidota;c__Bacteroidia;o__Bacteroidales;f__Bacteroidaceae;g__Prevotellamassilia;s__	30	0	1.09e-07
GUT_GENOME129560|NODE_1935_length_14063_cov_35.5825|1|8	SRR12685007|k141_1683_flag=1_multi=51.0000_len=2813	Lenarviricota	GUT_GENOME023798	d__Bacteria;p__Bacteroidota;c__Bacteroidia;o__Bacteroidales;f__Bacteroidaceae;g__Prevotellamassilia;s__	33	1	1.09e-07
GUT_GENOME129560|NODE_1935_length_14063_cov_35.5825|1|8	SRR11829105|k141_338766_flag=1_multi=18.0000_len=3423	Lenarviricota	GUT_GENOME023798	d__Bacteria;p__Bacteroidota;c__Bacteroidia;o__Bacteroidales;f__Bacteroidaceae;g__Prevotellamassilia;s__	30	0	1.09e-07
GUT_GENOME129560|NODE_1935_length_14063_cov_35.5825|1|8	SRR11450585|k141_241123_flag=1_multi=34.0000_len=8601	Pisuviricota	GUT_GENOME023798	d__Bacteria;p__Bacteroidota;c__Bacteroidia;o__Bacteroidales;f__Bacteroidaceae;g__Prevotellamassilia;s__	31	0	3.04e-08
GUT_GENOME129560|NODE_1935_length_14063_cov_35.5825|1|8	SRR11827441|k141_33000_flag=1_multi=5.0000_len=1680	Kitrinoviricota	GUT_GENOME023798	d__Bacteria;p__Bacteroidota;c__Bacteroidia;o__Bacteroidales;f__Bacteroidaceae;g__Prevotellamassilia;s__	33	1	1.09e-07
GUT_GENOME129560|NODE_1935_length_14063_cov_35.5825|1|8	SRR10849400|k141_649949_flag=1_multi=3.0000_len=1010	Lenarviricota	GUT_GENOME023798	d__Bacteria;p__Bacteroidota;c__Bacteroidia;o__Bacteroidales;f__Bacteroidaceae;g__Prevotellamassilia;s__	33	1	1.09e-07
GUT_GENOME129560|NODE_1935_length_14063_cov_35.5825|1|8	SRR11829101|k141_8574_flag=1_multi=3.0000_len=1251	Pisuviricota	GUT_GENOME023798	d__Bacteria;p__Bacteroidota;c__Bacteroidia;o__Bacteroidales;f__Bacteroidaceae;g__Prevotellamassilia;s__	32	0	8.45e-09
GUT_GENOME129560|NODE_1935_length_14063_cov_35.5825|1|8	SRR5829905|k141_82573_flag=1_multi=6.0000_len=1871	Pisuviricota	GUT_GENOME023798	d__Bacteria;p__Bacteroidota;c__Bacteroidia;o__Bacteroidales;f__Bacteroidaceae;g__Prevotellamassilia;s__	31	0	3.04e-08
GUT_GENOME129560|NODE_1935_length_14063_cov_35.5825|1|8	SRR11828594|k141_102106_flag=1_multi=8.0000_len=3507	Pisuviricota	GUT_GENOME023798	d__Bacteria;p__Bacteroidota;c__Bacteroidia;o__Bacteroidales;f__Bacteroidaceae;g__Prevotellamassilia;s__	31	0	3.04e-08
GUT_GENOME129560|NODE_1935_length_14063_cov_35.5825|1|8	SRR11829105|k141_91417_flag=1_multi=11.0000_len=2083	Unclassified	GUT_GENOME023798	d__Bacteria;p__Bacteroidota;c__Bacteroidia;o__Bacteroidales;f__Bacteroidaceae;g__Prevotellamassilia;s__	32	0	8.45e-09
GUT_GENOME129560|NODE_1935_length_14063_cov_35.5825|1|8	SRR11648360|k141_86114_flag=1_multi=282.0000_len=5501	Pisuviricota	GUT_GENOME023798	d__Bacteria;p__Bacteroidota;c__Bacteroidia;o__Bacteroidales;f__Bacteroidaceae;g__Prevotellamassilia;s__	31	0	3.04e-08
GUT_GENOME129560|NODE_1935_length_14063_cov_35.5825|1|8	SRR5829939|k141_57095_flag=1_multi=14.0000_len=5106	Duplornaviricota	GUT_GENOME023798	d__Bacteria;p__Bacteroidota;c__Bacteroidia;o__Bacteroidales;f__Bacteroidaceae;g__Prevotellamassilia;s__	30	0	1.09e-07
GUT_GENOME129560|NODE_1935_length_14063_cov_35.5825|1|8	SRR17509979|k141_54497_flag=1_multi=434.0000_len=1853	Pisuviricota	GUT_GENOME023798	d__Bacteria;p__Bacteroidota;c__Bacteroidia;o__Bacteroidales;f__Bacteroidaceae;g__Prevotellamassilia;s__	33	1	1.09e-07
GUT_GENOME129560|NODE_1935_length_14063_cov_35.5825|1|8	SRR11828460|k141_143027_flag=1_multi=5.0000_len=2858	Duplornaviricota	GUT_GENOME023798	d__Bacteria;p__Bacteroidota;c__Bacteroidia;o__Bacteroidales;f__Bacteroidaceae;g__Prevotellamassilia;s__	34	0	1.09e-07
GUT_GENOME129560|NODE_1935_length_14063_cov_35.5825|1|8	SRR11829260|k141_180147_flag=1_multi=7.0000_len=1885	Pisuviricota	GUT_GENOME023798	d__Bacteria;p__Bacteroidota;c__Bacteroidia;o__Bacteroidales;f__Bacteroidaceae;g__Prevotellamassilia;s__	30	0	1.09e-07
GUT_GENOME129560|NODE_1935_length_14063_cov_35.5825|1|8	SRR12685793|k141_137771_flag=1_multi=12.0000_len=3930	Kitrinoviricota	GUT_GENOME023798	d__Bacteria;p__Bacteroidota;c__Bacteroidia;o__Bacteroidales;f__Bacteroidaceae;g__Prevotellamassilia;s__	34	0	1.09e-07
GUT_GENOME129560|NODE_1935_length_14063_cov_35.5825|1|8	SRR11829331|k141_208460_flag=1_multi=7.0000_len=2919	Lenarviricota	GUT_GENOME023798	d__Bacteria;p__Bacteroidota;c__Bacteroidia;o__Bacteroidales;f__Bacteroidaceae;g__Prevotellamassilia;s__	30	0	1.09e-07
GUT_GENOME129560|NODE_1935_length_14063_cov_35.5825|1|8	SRR11450585|k141_139603_flag=1_multi=33.0000_len=8571	Pisuviricota	GUT_GENOME023798	d__Bacteria;p__Bacteroidota;c__Bacteroidia;o__Bacteroidales;f__Bacteroidaceae;g__Prevotellamassilia;s__	32	0	8.45e-09
GUT_GENOME129560|NODE_1935_length_14063_cov_35.5825|1|8	SRR12685793|k141_267_flag=1_multi=20.0000_len=2514	Lenarviricota	GUT_GENOME023798	d__Bacteria;p__Bacteroidota;c__Bacteroidia;o__Bacteroidales;f__Bacteroidaceae;g__Prevotellamassilia;s__	30	0	1.09e-07
GUT_GENOME129560|NODE_1935_length_14063_cov_35.5825|1|8	SRR12685793|k141_228219_flag=1_multi=26.0000_len=5170	Kitrinoviricota	GUT_GENOME023798	d__Bacteria;p__Bacteroidota;c__Bacteroidia;o__Bacteroidales;f__Bacteroidaceae;g__Prevotellamassilia;s__	32	0	8.45e-09
GUT_GENOME129560|NODE_1935_length_14063_cov_35.5825|1|8	SRR11828898|k141_96614_flag=1_multi=257.0000_len=2238	Lenarviricota	GUT_GENOME023798	d__Bacteria;p__Bacteroidota;c__Bacteroidia;o__Bacteroidales;f__Bacteroidaceae;g__Prevotellamassilia;s__	30	0	1.09e-07
GUT_GENOME129560|NODE_1935_length_14063_cov_35.5825|1|8	SRR17497126|k141_249905_flag=1_multi=12.6514_len=1690	Pisuviricota	GUT_GENOME023798	d__Bacteria;p__Bacteroidota;c__Bacteroidia;o__Bacteroidales;f__Bacteroidaceae;g__Prevotellamassilia;s__	44	1	1.4e-11
GUT_GENOME129560|NODE_1935_length_14063_cov_35.5825|1|8	SRR7007033|k141_135304_flag=1_multi=9.0000_len=3545	Kitrinoviricota	GUT_GENOME023798	d__Bacteria;p__Bacteroidota;c__Bacteroidia;o__Bacteroidales;f__Bacteroidaceae;g__Prevotellamassilia;s__	31	0	3.04e-08
GUT_GENOME129560|NODE_1935_length_14063_cov_35.5825|1|8	SRR7007032|k141_7123_flag=1_multi=152.0000_len=4154	Kitrinoviricota	GUT_GENOME023798	d__Bacteria;p__Bacteroidota;c__Bacteroidia;o__Bacteroidales;f__Bacteroidaceae;g__Prevotellamassilia;s__	42	0	3.9e-12
GUT_GENOME129560|NODE_1935_length_14063_cov_35.5825|1|8	SRR12685204|k141_50492_flag=1_multi=10.0000_len=4589	Kitrinoviricota	GUT_GENOME023798	d__Bacteria;p__Bacteroidota;c__Bacteroidia;o__Bacteroidales;f__Bacteroidaceae;g__Prevotellamassilia;s__	30	0	1.09e-07
GUT_GENOME129560|NODE_1935_length_14063_cov_35.5825|1|8	SRR17509957|k141_20379_flag=1_multi=94.3252_len=1746	Pisuviricota	GUT_GENOME023798	d__Bacteria;p__Bacteroidota;c__Bacteroidia;o__Bacteroidales;f__Bacteroidaceae;g__Prevotellamassilia;s__	33	1	1.09e-07
GUT_GENOME129560|NODE_1935_length_14063_cov_35.5825|1|8	SRR11829143|k141_288615_flag=1_multi=6.0000_len=2654	Duplornaviricota	GUT_GENOME023798	d__Bacteria;p__Bacteroidota;c__Bacteroidia;o__Bacteroidales;f__Bacteroidaceae;g__Prevotellamassilia;s__	33	1	1.09e-07
GUT_GENOME129560|NODE_1935_length_14063_cov_35.5825|1|8	SRR11828993|k141_161281_flag=1_multi=19.0000_len=2659	Kitrinoviricota	GUT_GENOME023798	d__Bacteria;p__Bacteroidota;c__Bacteroidia;o__Bacteroidales;f__Bacteroidaceae;g__Prevotellamassilia;s__	33	0	2.35e-09
GUT_GENOME129560|NODE_1935_length_14063_cov_35.5825|1|8	SRR7533591|k141_49244_flag=1_multi=62.0000_len=9979	Pisuviricota	GUT_GENOME023798	d__Bacteria;p__Bacteroidota;c__Bacteroidia;o__Bacteroidales;f__Bacteroidaceae;g__Prevotellamassilia;s__	30	0	1.09e-07
GUT_GENOME129560|NODE_1935_length_14063_cov_35.5825|1|8	SRR7004412|k141_92613_flag=1_multi=20.0000_len=6737	Pisuviricota	GUT_GENOME023798	d__Bacteria;p__Bacteroidota;c__Bacteroidia;o__Bacteroidales;f__Bacteroidaceae;g__Prevotellamassilia;s__	31	0	3.04e-08
GUT_GENOME129560|NODE_1935_length_14063_cov_35.5825|1|8	SRR11828594|k141_101656_flag=1_multi=55.0000_len=1890	Pisuviricota	GUT_GENOME023798	d__Bacteria;p__Bacteroidota;c__Bacteroidia;o__Bacteroidales;f__Bacteroidaceae;g__Prevotellamassilia;s__	35	1	8.45e-09
GUT_GENOME129560|NODE_1935_length_14063_cov_35.5825|1|8	SRR17509967|k141_64593_flag=1_multi=24.0000_len=2122	Pisuviricota	GUT_GENOME023798	d__Bacteria;p__Bacteroidota;c__Bacteroidia;o__Bacteroidales;f__Bacteroidaceae;g__Prevotellamassilia;s__	33	1	1.09e-07
GUT_GENOME129560|NODE_1935_length_14063_cov_35.5825|1|8	SRR11648360|k141_142347_flag=1_multi=5.8522_len=1663	Lenarviricota	GUT_GENOME023798	d__Bacteria;p__Bacteroidota;c__Bacteroidia;o__Bacteroidales;f__Bacteroidaceae;g__Prevotellamassilia;s__	33	0	2.35e-09
GUT_GENOME129560|NODE_1935_length_14063_cov_35.5825|1|8	SRR7004413|k141_399392_flag=1_multi=53.0000_len=3921	Kitrinoviricota	GUT_GENOME023798	d__Bacteria;p__Bacteroidota;c__Bacteroidia;o__Bacteroidales;f__Bacteroidaceae;g__Prevotellamassilia;s__	30	0	1.09e-07
GUT_GENOME129560|NODE_1935_length_14063_cov_35.5825|1|8	SRR11450585|k141_94684_flag=0_multi=18.9280_len=5642	Pisuviricota	GUT_GENOME023798	d__Bacteria;p__Bacteroidota;c__Bacteroidia;o__Bacteroidales;f__Bacteroidaceae;g__Prevotellamassilia;s__	30	0	1.09e-07
GUT_GENOME129560|NODE_1935_length_14063_cov_35.5825|1|8	SRR7007008|k141_55109_flag=1_multi=9.0000_len=3062	Kitrinoviricota	GUT_GENOME023798	d__Bacteria;p__Bacteroidota;c__Bacteroidia;o__Bacteroidales;f__Bacteroidaceae;g__Prevotellamassilia;s__	33	1	1.09e-07
GUT_GENOME129560|NODE_1935_length_14063_cov_35.5825|1|8	SRR11829105|k141_88766_flag=1_multi=4.0000_len=1028	Pisuviricota	GUT_GENOME023798	d__Bacteria;p__Bacteroidota;c__Bacteroidia;o__Bacteroidales;f__Bacteroidaceae;g__Prevotellamassilia;s__	32	0	8.45e-09
GUT_GENOME129560|NODE_1935_length_14063_cov_35.5825|1|8	SRR11450579|k141_18660_flag=1_multi=89.0000_len=3916	Lenarviricota	GUT_GENOME023798	d__Bacteria;p__Bacteroidota;c__Bacteroidia;o__Bacteroidales;f__Bacteroidaceae;g__Prevotellamassilia;s__	31	0	3.04e-08
GUT_GENOME129560|NODE_1935_length_14063_cov_35.5825|1|8	SRR12685203|k141_74905_flag=1_multi=183.0000_len=2776	Kitrinoviricota	GUT_GENOME023798	d__Bacteria;p__Bacteroidota;c__Bacteroidia;o__Bacteroidales;f__Bacteroidaceae;g__Prevotellamassilia;s__	30	0	1.09e-07
GUT_GENOME129560|NODE_1935_length_14063_cov_35.5825|1|8	SRR7538850|k141_46272_flag=1_multi=10.0000_len=2258	Lenarviricota	GUT_GENOME023798	d__Bacteria;p__Bacteroidota;c__Bacteroidia;o__Bacteroidales;f__Bacteroidaceae;g__Prevotellamassilia;s__	31	0	3.04e-08
GUT_GENOME129560|NODE_1935_length_14063_cov_35.5825|1|8	SRR17481242|k141_14860_flag=1_multi=140.0000_len=3974	Unclassified	GUT_GENOME023798	d__Bacteria;p__Bacteroidota;c__Bacteroidia;o__Bacteroidales;f__Bacteroidaceae;g__Prevotellamassilia;s__	33	0	2.35e-09
GUT_GENOME129560|NODE_1935_length_14063_cov_35.5825|1|8	SRR17497126|k141_17755_flag=1_multi=105.0000_len=4517	Lenarviricota	GUT_GENOME023798	d__Bacteria;p__Bacteroidota;c__Bacteroidia;o__Bacteroidales;f__Bacteroidaceae;g__Prevotellamassilia;s__	33	1	1.09e-07
GUT_GENOME129560|NODE_1935_length_14063_cov_35.5825|1|8	SRR7004412|k141_84767_flag=1_multi=99.0000_len=3539	Kitrinoviricota	GUT_GENOME023798	d__Bacteria;p__Bacteroidota;c__Bacteroidia;o__Bacteroidales;f__Bacteroidaceae;g__Prevotellamassilia;s__	31	0	3.04e-08
GUT_GENOME129560|NODE_1935_length_14063_cov_35.5825|1|8	SRR11622450|k141_123568_flag=1_multi=80.0000_len=3865	Lenarviricota	GUT_GENOME023798	d__Bacteria;p__Bacteroidota;c__Bacteroidia;o__Bacteroidales;f__Bacteroidaceae;g__Prevotellamassilia;s__	30	0	1.09e-07
GUT_GENOME129560|NODE_1935_length_14063_cov_35.5825|1|8	SRR18770930|k141_101117_flag=1_multi=6.0000_len=1183	Kitrinoviricota	GUT_GENOME023798	d__Bacteria;p__Bacteroidota;c__Bacteroidia;o__Bacteroidales;f__Bacteroidaceae;g__Prevotellamassilia;s__	33	1	1.09e-07
GUT_GENOME130545|NODE_450_length_33320_cov_6.23283|2|16	SRR11827439|k141_84850_flag=1_multi=4.8177_len=1260	Kitrinoviricota	GUT_GENOME000586	d__Bacteria;p__Firmicutes_A;c__Clostridia;o__Eubacteriales;f__Eubacteriaceae;g__Eubacterium;s__Eubacterium callanderi	30	0	0.000444
GUT_GENOME131841|NODE_185_length_52138_cov_7.04975|1|6	SRR17497098|k141_69738_flag=1_multi=1185.0000_len=1617	Pisuviricota	GUT_GENOME141226	d__Bacteria;p__Firmicutes_A;c__Clostridia;o__Oscillospirales;f__Oscillospiraceae;g__Intestinimonas;s__Intestinimonas butyriciproducens	31	0	2.11e-08
GUT_GENOME133134|NODE_507_length_24029_cov_2.1643|5|2	SRR11829261|k141_127994_flag=1_multi=9.0000_len=2328	Pisuviricota	GUT_GENOME141068	d__Bacteria;p__Firmicutes_A;c__Clostridia;o__Lachnospirales;f__Lachnospiraceae;g__Eisenbergiella;s__Eisenbergiella tayi	26	1	0.000518
GUT_GENOME134402|NODE_1262_length_13037_cov_2.64482|1|8	SRR7532745|k141_67301_flag=1_multi=7.0000_len=5564	Kitrinoviricota	GUT_GENOME245758	d__Bacteria;p__Firmicutes_A;c__Clostridia;o__Oscillospirales;f__Ruminococcaceae;g__Ruminiclostridium_E;s__	23	0	0.000333
GUT_GENOME134700|NODE_349_length_35509_cov_3.79342|1|13	SRR11648176|k141_60865_flag=1_multi=117.8157_len=8095	Pisuviricota	GUT_GENOME025243	d__Bacteria;p__Firmicutes;c__Bacilli;o__RF39;f__CAG-611;g__CAG-451;s__CAG-451 sp000438295	27	0	0.000296
GUT_GENOME135153|NODE_1939_length_13256_cov_20.1792|1|22	SRR11622354|k141_48685_flag=0_multi=7.4122_len=2737	Pisuviricota	GUT_GENOME143505	d__Bacteria;p__Bacteroidota;c__Bacteroidia;o__Bacteroidales;f__Bacteroidaceae;g__Bacteroides_B;s__Bacteroides_B dorei	23	0	0.000481
GUT_GENOME136007|NODE_126_length_65478_cov_8.20409|1|31	SRR11649087|k141_72476_flag=1_multi=5.0000_len=1403	Negarnaviricota	GUT_GENOME000295	d__Bacteria;p__Firmicutes_A;c__Clostridia;o__Lachnospirales;f__Lachnospiraceae;g__Roseburia;s__Roseburia intestinalis	30	1	0.000296
GUT_GENOME136700|NODE_336_length_62994_cov_4.69342|1|27	SRR11829260|k141_17746_flag=1_multi=6.0000_len=1868	Pisuviricota	GUT_GENOME208942	d__Bacteria;p__Bacteroidota;c__Bacteroidia;o__Bacteroidales;f__Muribaculaceae;g__CAG-485;s__CAG-485 sp000437495	26	1	0.000555
GUT_GENOME137013|NODE_4249_length_8069_cov_2.6546|1|1	SRR11450579|k141_225818_flag=1_multi=84.0000_len=9187	Pisuviricota	GUT_GENOME239684	d__Bacteria;p__Firmicutes_A;c__Clostridia;o__Oscillospirales;f__Oscillospiraceae;g__ER4;s__ER4 sp000765235	26	1	0.000444
GUT_GENOME137715|NODE_1524_length_14642_cov_2.4613|4|11	SRR11829260|k141_99126_flag=1_multi=7.0000_len=3733	Kitrinoviricota	GUT_GENOME140265	d__Bacteria;p__Firmicutes_A;c__Clostridia;o__Lachnospirales;f__Lachnospiraceae;g__Blautia;s__Blautia sp000436935	23	0	0.000444
GUT_GENOME138079|NODE_1_length_483349_cov_15.1124|2|74	SRR17509931|k141_86152_flag=1_multi=34.0000_len=1407	Pisuviricota	GUT_GENOME268399	d__Bacteria;p__Firmicutes_C;c__Negativicutes;o__Acidaminococcales;f__Acidaminococcaceae;g__Phascolarctobacterium;s__Phascolarctobacterium sp000436095	26	1	0.000407
GUT_GENOME138627|NODE_4042_length_9920_cov_3.92347|1|1	SRR11565438|k141_64735_flag=1_multi=12.0000_len=4095	Lenarviricota	GUT_GENOME125875	d__Bacteria;p__Firmicutes_A;c__Clostridia;o__Christensenellales;f__CAG-74;g__;s__	27	0	0.000407
GUT_GENOME138738|NODE_1700_length_27633_cov_12.1271|1|32	SRR11450579|k141_225818_flag=1_multi=84.0000_len=9187	Pisuviricota	GUT_GENOME239684	d__Bacteria;p__Firmicutes_A;c__Clostridia;o__Oscillospirales;f__Oscillospiraceae;g__ER4;s__ER4 sp000765235	26	1	0.000444
GUT_GENOME139987|NODE_31_length_99716_cov_11.5101|2|4	SRR11829332|k141_67972_flag=1_multi=6.0000_len=1930	Pisuviricota	GUT_GENOME253237	d__Bacteria;p__Firmicutes_A;c__Clostridia;o__TANB77;f__CAG-465;g__CAG-465;s__CAG-465 sp000433755	24	0	0.000123
GUT_GENOME140283|OM05-12.Scaf5|1|3	SRR11829332|k141_140645_flag=1_multi=5.0000_len=2837	Pisuviricota	GUT_GENOME140283	d__Bacteria;p__Bacteroidota;c__Bacteroidia;o__Bacteroidales;f__Bacteroidaceae;g__;s__	24	0	0.000206
GUT_GENOME140283|OM05-12.Scaf5|1|3	SRR11565167|k141_124505_flag=1_multi=11.0000_len=1677	Kitrinoviricota	GUT_GENOME140283	d__Bacteria;p__Bacteroidota;c__Bacteroidia;o__Bacteroidales;f__Bacteroidaceae;g__;s__	32	1	3.42e-07
GUT_GENOME140283|OM05-12.Scaf5|1|3	SRR11649087|k141_62756_flag=1_multi=5.9805_len=5783	Pisuviricota	GUT_GENOME140283	d__Bacteria;p__Bacteroidota;c__Bacteroidia;o__Bacteroidales;f__Bacteroidaceae;g__;s__	32	2	1.59e-05
GUT_GENOME140283|OM05-12.Scaf5|1|3	SRR11829332|k141_140645_flag=1_multi=5.0000_len=2837	Pisuviricota	GUT_GENOME140283	d__Bacteria;p__Bacteroidota;c__Bacteroidia;o__Bacteroidales;f__Bacteroidaceae;g__;s__	24	0	0.000206
GUT_GENOME140283|OM05-12.Scaf5|1|3	SRR17509970|k141_1110097_flag=1_multi=29.0000_len=2075	Pisuviricota	GUT_GENOME140283	d__Bacteria;p__Bacteroidota;c__Bacteroidia;o__Bacteroidales;f__Bacteroidaceae;g__;s__	26	1	0.00074
GUT_GENOME140283|OM05-12.Scaf5|1|3	SRR11829332|k141_140645_flag=1_multi=5.0000_len=2837	Pisuviricota	GUT_GENOME140283	d__Bacteria;p__Bacteroidota;c__Bacteroidia;o__Bacteroidales;f__Bacteroidaceae;g__;s__	24	0	0.000206
GUT_GENOME140283|OM05-12.Scaf5|1|3	SRR11565167|k141_124505_flag=1_multi=11.0000_len=1677	Kitrinoviricota	GUT_GENOME140283	d__Bacteria;p__Bacteroidota;c__Bacteroidia;o__Bacteroidales;f__Bacteroidaceae;g__;s__	32	1	3.42e-07
GUT_GENOME140283|OM05-12.Scaf5|1|3	SRR17509970|k141_1110097_flag=1_multi=29.0000_len=2075	Pisuviricota	GUT_GENOME140283	d__Bacteria;p__Bacteroidota;c__Bacteroidia;o__Bacteroidales;f__Bacteroidaceae;g__;s__	26	1	0.00074
GUT_GENOME140283|OM05-12.Scaf5|1|3	SRR11649087|k141_62756_flag=1_multi=5.9805_len=5783	Pisuviricota	GUT_GENOME140283	d__Bacteria;p__Bacteroidota;c__Bacteroidia;o__Bacteroidales;f__Bacteroidaceae;g__;s__	32	2	1.59e-05
GUT_GENOME140283|OM05-12.Scaf5|1|3	SRR11829332|k141_140645_flag=1_multi=5.0000_len=2837	Pisuviricota	GUT_GENOME140283	d__Bacteria;p__Bacteroidota;c__Bacteroidia;o__Bacteroidales;f__Bacteroidaceae;g__;s__	24	0	0.000206
GUT_GENOME140283|OM05-12.Scaf5|1|3	SRR11565167|k141_124505_flag=1_multi=11.0000_len=1677	Kitrinoviricota	GUT_GENOME140283	d__Bacteria;p__Bacteroidota;c__Bacteroidia;o__Bacteroidales;f__Bacteroidaceae;g__;s__	32	1	3.42e-07
GUT_GENOME140283|OM05-12.Scaf5|1|3	SRR11829332|k141_140645_flag=1_multi=5.0000_len=2837	Pisuviricota	GUT_GENOME140283	d__Bacteria;p__Bacteroidota;c__Bacteroidia;o__Bacteroidales;f__Bacteroidaceae;g__;s__	24	0	0.000206
GUT_GENOME140283|OM05-12.Scaf5|1|3	SRR17509970|k141_1110097_flag=1_multi=29.0000_len=2075	Pisuviricota	GUT_GENOME140283	d__Bacteria;p__Bacteroidota;c__Bacteroidia;o__Bacteroidales;f__Bacteroidaceae;g__;s__	26	1	0.00074
GUT_GENOME141042|accn|AMDL01000002|1|7	SRR11829261|k141_152797_flag=1_multi=151.2792_len=2526	Kitrinoviricota	GUT_GENOME142330	d__Bacteria;p__Firmicutes_A;c__Clostridia;o__Peptostreptococcales;f__Peptostreptococcaceae;g__Clostridioides;s__Clostridioides difficile	25	0	4.29e-05
GUT_GENOME141043|accn|AMDM01000002|1|7	SRR11829261|k141_152797_flag=1_multi=151.2792_len=2526	Kitrinoviricota	GUT_GENOME142330	d__Bacteria;p__Firmicutes_A;c__Clostridia;o__Peptostreptococcales;f__Peptostreptococcaceae;g__Clostridioides;s__Clostridioides difficile	25	0	4.29e-05
GUT_GENOME141065|accn|BAHZ01000019|2|4	SRR11564368|k141_7849_flag=1_multi=10.0000_len=2181	Lenarviricota	GUT_GENOME141068	d__Bacteria;p__Firmicutes_A;c__Clostridia;o__Lachnospirales;f__Lachnospiraceae;g__Eisenbergiella;s__Eisenbergiella tayi	23	0	0.00037
GUT_GENOME141105|accn|AOSX01000021|3|14	SRR5208455|k141_238906_flag=1_multi=8.0000_len=6507	Kitrinoviricota	GUT_GENOME141698	d__Bacteria;p__Firmicutes_A;c__Clostridia;o__Clostridiales;f__Clostridiaceae;g__Clostridium_F;s__Clostridium_F botulinum	30	1	0.000518
GUT_GENOME141700|AUYY01000008|5|3	SRR7540365|k141_103851_flag=1_multi=9.0000_len=9484	Pisuviricota	GUT_GENOME141698	d__Bacteria;p__Firmicutes_A;c__Clostridia;o__Clostridiales;f__Clostridiaceae;g__Clostridium_F;s__Clostridium_F botulinum	31	1	0.000206
GUT_GENOME141767|accn|LROF01000007|1|11	SRR11648413|k141_155839_flag=0_multi=32.5524_len=1714	Lenarviricota	GUT_GENOME142031	d__Bacteria;p__Proteobacteria;c__Gammaproteobacteria;o__Enterobacterales;f__Enterobacteriaceae;g__Salmonella;s__Salmonella enterica	23	0	0.000333
GUT_GENOME141767|accn|LROF01000007|2|2	SRR11648413|k141_155839_flag=0_multi=32.5524_len=1714	Lenarviricota	GUT_GENOME142031	d__Bacteria;p__Proteobacteria;c__Gammaproteobacteria;o__Enterobacterales;f__Enterobacteriaceae;g__Salmonella;s__Salmonella enterica	23	0	0.000333
GUT_GENOME141768|accn|LROE01000021|1|11	SRR11648413|k141_155839_flag=0_multi=32.5524_len=1714	Lenarviricota	GUT_GENOME142031	d__Bacteria;p__Proteobacteria;c__Gammaproteobacteria;o__Enterobacterales;f__Enterobacteriaceae;g__Salmonella;s__Salmonella enterica	23	0	0.000333
GUT_GENOME141769|accn|LROC01000075|2|11	SRR11648413|k141_155839_flag=0_multi=32.5524_len=1714	Lenarviricota	GUT_GENOME142031	d__Bacteria;p__Proteobacteria;c__Gammaproteobacteria;o__Enterobacterales;f__Enterobacteriaceae;g__Salmonella;s__Salmonella enterica	23	0	0.000333
GUT_GENOME141770|accn|LROA01000002|1|11	SRR11648413|k141_155839_flag=0_multi=32.5524_len=1714	Lenarviricota	GUT_GENOME142031	d__Bacteria;p__Proteobacteria;c__Gammaproteobacteria;o__Enterobacterales;f__Enterobacteriaceae;g__Salmonella;s__Salmonella enterica	23	0	0.000333
GUT_GENOME141771|accn|LRNL01000018|2|11	SRR11648413|k141_155839_flag=0_multi=32.5524_len=1714	Lenarviricota	GUT_GENOME142031	d__Bacteria;p__Proteobacteria;c__Gammaproteobacteria;o__Enterobacterales;f__Enterobacteriaceae;g__Salmonella;s__Salmonella enterica	23	0	0.000333
GUT_GENOME141772|accn|LWJD01000007|1|11	SRR11648413|k141_155839_flag=0_multi=32.5524_len=1714	Lenarviricota	GUT_GENOME142031	d__Bacteria;p__Proteobacteria;c__Gammaproteobacteria;o__Enterobacterales;f__Enterobacteriaceae;g__Salmonella;s__Salmonella enterica	23	0	0.000333
GUT_GENOME141773|accn|LWJF01000001|1|11	SRR11648413|k141_155839_flag=0_multi=32.5524_len=1714	Lenarviricota	GUT_GENOME142031	d__Bacteria;p__Proteobacteria;c__Gammaproteobacteria;o__Enterobacterales;f__Enterobacteriaceae;g__Salmonella;s__Salmonella enterica	23	0	0.000333
GUT_GENOME142158|MOSV01000039|3|8	SRR11828459|k141_18049_flag=1_multi=4.0000_len=1029	Duplornaviricota	GUT_GENOME142330	d__Bacteria;p__Firmicutes_A;c__Clostridia;o__Peptostreptococcales;f__Peptostreptococcaceae;g__Clostridioides;s__Clostridioides difficile	29	1	1.11e-05
GUT_GENOME142168|MNBS01000128|9|8	SRR11678449|k141_202550_flag=1_multi=6.0000_len=6334	Negarnaviricota	GUT_GENOME142330	d__Bacteria;p__Firmicutes_A;c__Clostridia;o__Peptostreptococcales;f__Peptostreptococcaceae;g__Clostridioides;s__Clostridioides difficile	30	1	0.001
GUT_GENOME142181|MOPL01000013|6|20	SRR11828806|k141_166307_flag=1_multi=10.0000_len=7065	Negarnaviricota	GUT_GENOME142330	d__Bacteria;p__Firmicutes_A;c__Clostridia;o__Peptostreptococcales;f__Peptostreptococcaceae;g__Clostridioides;s__Clostridioides difficile	31	1	0.000154
GUT_GENOME142186|MOPQ01000063|9|5	SRR11828459|k141_18049_flag=1_multi=4.0000_len=1029	Duplornaviricota	GUT_GENOME142330	d__Bacteria;p__Firmicutes_A;c__Clostridia;o__Peptostreptococcales;f__Peptostreptococcaceae;g__Clostridioides;s__Clostridioides difficile	29	1	1.11e-05
GUT_GENOME142195|MOPY01000046|9|12	SRR11829101|k141_170810_flag=1_multi=15.0000_len=5608	Kitrinoviricota	GUT_GENOME142330	d__Bacteria;p__Firmicutes_A;c__Clostridia;o__Peptostreptococcales;f__Peptostreptococcaceae;g__Clostridioides;s__Clostridioides difficile	30	0	1.11e-05
GUT_GENOME142197|MOQA01000010|6|9	SRR11828459|k141_18049_flag=1_multi=4.0000_len=1029	Duplornaviricota	GUT_GENOME142330	d__Bacteria;p__Firmicutes_A;c__Clostridia;o__Peptostreptococcales;f__Peptostreptococcaceae;g__Clostridioides;s__Clostridioides difficile	29	1	1.11e-05
GUT_GENOME142198|MOQC01000005|8|12	SRR11829101|k141_170810_flag=1_multi=15.0000_len=5608	Kitrinoviricota	GUT_GENOME142330	d__Bacteria;p__Firmicutes_A;c__Clostridia;o__Peptostreptococcales;f__Peptostreptococcaceae;g__Clostridioides;s__Clostridioides difficile	30	0	1.11e-05
GUT_GENOME142202|MOQI01000006|2|19	SRR11829101|k141_170810_flag=1_multi=15.0000_len=5608	Kitrinoviricota	GUT_GENOME142330	d__Bacteria;p__Firmicutes_A;c__Clostridia;o__Peptostreptococcales;f__Peptostreptococcaceae;g__Clostridioides;s__Clostridioides difficile	30	0	1.11e-05
GUT_GENOME142208|MOQN01000068|9|19	SRR11829101|k141_170810_flag=1_multi=15.0000_len=5608	Kitrinoviricota	GUT_GENOME142330	d__Bacteria;p__Firmicutes_A;c__Clostridia;o__Peptostreptococcales;f__Peptostreptococcaceae;g__Clostridioides;s__Clostridioides difficile	30	0	1.11e-05
GUT_GENOME142213|MOQW01000002|2|11	SRR11827439|k141_109350_flag=1_multi=4.0000_len=2497	Duplornaviricota	GUT_GENOME142330	d__Bacteria;p__Firmicutes_A;c__Clostridia;o__Peptostreptococcales;f__Peptostreptococcaceae;g__Clostridioides;s__Clostridioides difficile	26	1	0.000481
GUT_GENOME142216|MOQU01000189|8|11	SRR11827439|k141_109350_flag=1_multi=4.0000_len=2497	Duplornaviricota	GUT_GENOME142330	d__Bacteria;p__Firmicutes_A;c__Clostridia;o__Peptostreptococcales;f__Peptostreptococcaceae;g__Clostridioides;s__Clostridioides difficile	26	1	0.000481
GUT_GENOME142219|MPEP01000031|10|7	SRR11829261|k141_152797_flag=1_multi=151.2792_len=2526	Kitrinoviricota	GUT_GENOME142330	d__Bacteria;p__Firmicutes_A;c__Clostridia;o__Peptostreptococcales;f__Peptostreptococcaceae;g__Clostridioides;s__Clostridioides difficile	25	0	4.29e-05
GUT_GENOME142221|MPER01000001|1|11	SRR11827439|k141_109350_flag=1_multi=4.0000_len=2497	Duplornaviricota	GUT_GENOME142330	d__Bacteria;p__Firmicutes_A;c__Clostridia;o__Peptostreptococcales;f__Peptostreptococcaceae;g__Clostridioides;s__Clostridioides difficile	26	1	0.000481
GUT_GENOME142242|MPFF01000037|11|7	SRR11828459|k141_18049_flag=1_multi=4.0000_len=1029	Duplornaviricota	GUT_GENOME142330	d__Bacteria;p__Firmicutes_A;c__Clostridia;o__Peptostreptococcales;f__Peptostreptococcaceae;g__Clostridioides;s__Clostridioides difficile	29	1	1.11e-05
GUT_GENOME142245|MPFE01000002|3|7	SRR11829261|k141_152797_flag=1_multi=151.2792_len=2526	Kitrinoviricota	GUT_GENOME142330	d__Bacteria;p__Firmicutes_A;c__Clostridia;o__Peptostreptococcales;f__Peptostreptococcaceae;g__Clostridioides;s__Clostridioides difficile	25	0	4.29e-05
GUT_GENOME142246|MPFH01000015|5|11	SRR11827439|k141_109350_flag=1_multi=4.0000_len=2497	Duplornaviricota	GUT_GENOME142330	d__Bacteria;p__Firmicutes_A;c__Clostridia;o__Peptostreptococcales;f__Peptostreptococcaceae;g__Clostridioides;s__Clostridioides difficile	26	1	0.000481
GUT_GENOME142262|MPFT01000002|2|12	SRR11828806|k141_166307_flag=1_multi=10.0000_len=7065	Negarnaviricota	GUT_GENOME142330	d__Bacteria;p__Firmicutes_A;c__Clostridia;o__Peptostreptococcales;f__Peptostreptococcaceae;g__Clostridioides;s__Clostridioides difficile	31	1	0.000154
GUT_GENOME142265|MPFW01000043|9|7	SRR11829261|k141_152797_flag=1_multi=151.2792_len=2526	Kitrinoviricota	GUT_GENOME142330	d__Bacteria;p__Firmicutes_A;c__Clostridia;o__Peptostreptococcales;f__Peptostreptococcaceae;g__Clostridioides;s__Clostridioides difficile	25	0	4.29e-05
GUT_GENOME142270|MPJP01000001|3|11	SRR11827439|k141_109350_flag=1_multi=4.0000_len=2497	Duplornaviricota	GUT_GENOME142330	d__Bacteria;p__Firmicutes_A;c__Clostridia;o__Peptostreptococcales;f__Peptostreptococcaceae;g__Clostridioides;s__Clostridioides difficile	26	1	0.000481
GUT_GENOME142285|MOTK01000005|4|8	SRR11828459|k141_18049_flag=1_multi=4.0000_len=1029	Duplornaviricota	GUT_GENOME142330	d__Bacteria;p__Firmicutes_A;c__Clostridia;o__Peptostreptococcales;f__Peptostreptococcaceae;g__Clostridioides;s__Clostridioides difficile	29	1	1.11e-05
GUT_GENOME142286|MPJR01000082|6|5	SRR11828459|k141_18049_flag=1_multi=4.0000_len=1029	Duplornaviricota	GUT_GENOME142330	d__Bacteria;p__Firmicutes_A;c__Clostridia;o__Peptostreptococcales;f__Peptostreptococcaceae;g__Clostridioides;s__Clostridioides difficile	29	1	1.11e-05
GUT_GENOME142288|MOTL01000001|1|3	SRR11827439|k141_109350_flag=1_multi=4.0000_len=2497	Duplornaviricota	GUT_GENOME142330	d__Bacteria;p__Firmicutes_A;c__Clostridia;o__Peptostreptococcales;f__Peptostreptococcaceae;g__Clostridioides;s__Clostridioides difficile	26	1	0.000481
GUT_GENOME142289|MOTM01000001|1|11	SRR11827439|k141_109350_flag=1_multi=4.0000_len=2497	Duplornaviricota	GUT_GENOME142330	d__Bacteria;p__Firmicutes_A;c__Clostridia;o__Peptostreptococcales;f__Peptostreptococcaceae;g__Clostridioides;s__Clostridioides difficile	26	1	0.000481
GUT_GENOME142289|MOTM01000070|10|2	SRR5829926|k141_235250_flag=1_multi=9.0000_len=9051	Pisuviricota	GUT_GENOME142330	d__Bacteria;p__Firmicutes_A;c__Clostridia;o__Peptostreptococcales;f__Peptostreptococcaceae;g__Clostridioides;s__Clostridioides difficile	30	1	0.000333
GUT_GENOME142289|MOTM01000070|10|2	SRR7536466|k141_280789_flag=1_multi=14.0000_len=9202	Pisuviricota	GUT_GENOME142330	d__Bacteria;p__Firmicutes_A;c__Clostridia;o__Peptostreptococcales;f__Peptostreptococcaceae;g__Clostridioides;s__Clostridioides difficile	29	1	7.16e-06
GUT_GENOME142289|MOTM01000070|10|2	SRR11648360|k141_238775_flag=1_multi=340.0000_len=9219	Pisuviricota	GUT_GENOME142330	d__Bacteria;p__Firmicutes_A;c__Clostridia;o__Peptostreptococcales;f__Peptostreptococcaceae;g__Clostridioides;s__Clostridioides difficile	32	2	7.16e-06
GUT_GENOME142289|MOTM01000070|10|2	SRR7536466|k141_280789_flag=1_multi=14.0000_len=9202	Pisuviricota	GUT_GENOME142330	d__Bacteria;p__Firmicutes_A;c__Clostridia;o__Peptostreptococcales;f__Peptostreptococcaceae;g__Clostridioides;s__Clostridioides difficile	29	1	7.16e-06
GUT_GENOME142289|MOTM01000070|10|2	SRR11648360|k141_238775_flag=1_multi=340.0000_len=9219	Pisuviricota	GUT_GENOME142330	d__Bacteria;p__Firmicutes_A;c__Clostridia;o__Peptostreptococcales;f__Peptostreptococcaceae;g__Clostridioides;s__Clostridioides difficile	32	2	7.16e-06
GUT_GENOME142289|MOTM01000070|10|2	SRR7536466|k141_280789_flag=1_multi=14.0000_len=9202	Pisuviricota	GUT_GENOME142330	d__Bacteria;p__Firmicutes_A;c__Clostridia;o__Peptostreptococcales;f__Peptostreptococcaceae;g__Clostridioides;s__Clostridioides difficile	29	1	7.16e-06
GUT_GENOME142289|MOTM01000070|10|7	SRR11450579|k141_3421_flag=1_multi=110.0000_len=8612	Pisuviricota	GUT_GENOME142330	d__Bacteria;p__Firmicutes_A;c__Clostridia;o__Peptostreptococcales;f__Peptostreptococcaceae;g__Clostridioides;s__Clostridioides difficile	38	4	1.19e-05
GUT_GENOME142289|MOTM01000070|10|7	SRR11450580|k141_109913_flag=1_multi=102.0000_len=6558	Pisuviricota	GUT_GENOME142330	d__Bacteria;p__Firmicutes_A;c__Clostridia;o__Peptostreptococcales;f__Peptostreptococcaceae;g__Clostridioides;s__Clostridioides difficile	38	4	1.19e-05
GUT_GENOME142289|MOTM01000070|10|7	SRR11649087|k141_263042_flag=1_multi=27.0000_len=4125	Kitrinoviricota	GUT_GENOME142330	d__Bacteria;p__Firmicutes_A;c__Clostridia;o__Peptostreptococcales;f__Peptostreptococcaceae;g__Clostridioides;s__Clostridioides difficile	38	4	1.19e-05
GUT_GENOME142289|MOTM01000070|10|7	SRR11563379|k141_984_flag=1_multi=10.0000_len=5356	Pisuviricota	GUT_GENOME142330	d__Bacteria;p__Firmicutes_A;c__Clostridia;o__Peptostreptococcales;f__Peptostreptococcaceae;g__Clostridioides;s__Clostridioides difficile	38	4	1.19e-05
GUT_GENOME142289|MOTM01000070|10|7	SRR11450579|k141_17049_flag=1_multi=4764.0000_len=8934	Pisuviricota	GUT_GENOME142330	d__Bacteria;p__Firmicutes_A;c__Clostridia;o__Peptostreptococcales;f__Peptostreptococcaceae;g__Clostridioides;s__Clostridioides difficile	38	4	1.19e-05
GUT_GENOME142289|MOTM01000070|10|7	BC-0345724490|k141_9515	Duplornaviricota	GUT_GENOME142330	d__Bacteria;p__Firmicutes_A;c__Clostridia;o__Peptostreptococcales;f__Peptostreptococcaceae;g__Clostridioides;s__Clostridioides difficile	38	4	1.19e-05
GUT_GENOME142289|MOTM01000070|10|7	BC-0302417267|k141_472	Kitrinoviricota	GUT_GENOME142330	d__Bacteria;p__Firmicutes_A;c__Clostridia;o__Peptostreptococcales;f__Peptostreptococcaceae;g__Clostridioides;s__Clostridioides difficile	38	4	1.19e-05
GUT_GENOME142289|MOTM01000070|10|7	BC-0345732070|k141_514	Pisuviricota	GUT_GENOME142330	d__Bacteria;p__Firmicutes_A;c__Clostridia;o__Peptostreptococcales;f__Peptostreptococcaceae;g__Clostridioides;s__Clostridioides difficile	38	1	0.000154
GUT_GENOME142289|MOTM01000070|10|7	SRR11829260|k141_2197_flag=1_multi=57.0000_len=4196	Kitrinoviricota	GUT_GENOME142330	d__Bacteria;p__Firmicutes_A;c__Clostridia;o__Peptostreptococcales;f__Peptostreptococcaceae;g__Clostridioides;s__Clostridioides difficile	38	4	1.19e-05
GUT_GENOME142289|MOTM01000070|10|7	SRR11829260|k141_2197_flag=1_multi=57.0000_len=4196	Kitrinoviricota	GUT_GENOME142330	d__Bacteria;p__Firmicutes_A;c__Clostridia;o__Peptostreptococcales;f__Peptostreptococcaceae;g__Clostridioides;s__Clostridioides difficile	38	4	1.19e-05
GUT_GENOME142289|MOTM01000070|10|7	SRR11450577|k141_1033_flag=1_multi=59.9742_len=2428	Pisuviricota	GUT_GENOME142330	d__Bacteria;p__Firmicutes_A;c__Clostridia;o__Peptostreptococcales;f__Peptostreptococcaceae;g__Clostridioides;s__Clostridioides difficile	38	4	1.19e-05
GUT_GENOME142289|MOTM01000070|10|7	SRR11829260|k141_2197_flag=1_multi=57.0000_len=4196	Kitrinoviricota	GUT_GENOME142330	d__Bacteria;p__Firmicutes_A;c__Clostridia;o__Peptostreptococcales;f__Peptostreptococcaceae;g__Clostridioides;s__Clostridioides difficile	38	4	1.19e-05
GUT_GENOME142289|MOTM01000070|10|7	BC-0302413540|k141_158	Kitrinoviricota	GUT_GENOME142330	d__Bacteria;p__Firmicutes_A;c__Clostridia;o__Peptostreptococcales;f__Peptostreptococcaceae;g__Clostridioides;s__Clostridioides difficile	38	4	1.19e-05
GUT_GENOME142289|MOTM01000070|10|7	BC-0345732070|k141_514	Pisuviricota	GUT_GENOME142330	d__Bacteria;p__Firmicutes_A;c__Clostridia;o__Peptostreptococcales;f__Peptostreptococcaceae;g__Clostridioides;s__Clostridioides difficile	38	1	0.000154
GUT_GENOME142289|MOTM01000070|10|7	SRR11648360|k141_187449_flag=1_multi=2812.0000_len=9848	Pisuviricota	GUT_GENOME142330	d__Bacteria;p__Firmicutes_A;c__Clostridia;o__Peptostreptococcales;f__Peptostreptococcaceae;g__Clostridioides;s__Clostridioides difficile	38	4	1.19e-05
GUT_GENOME142289|MOTM01000070|10|7	BC-0345649514|k141_807	Pisuviricota	GUT_GENOME142330	d__Bacteria;p__Firmicutes_A;c__Clostridia;o__Peptostreptococcales;f__Peptostreptococcaceae;g__Clostridioides;s__Clostridioides difficile	38	4	1.19e-05
GUT_GENOME142289|MOTM01000070|10|7	SRR11648360|k141_2427_flag=0_multi=550.5579_len=8547	Pisuviricota	GUT_GENOME142330	d__Bacteria;p__Firmicutes_A;c__Clostridia;o__Peptostreptococcales;f__Peptostreptococcaceae;g__Clostridioides;s__Clostridioides difficile	38	4	1.19e-05
GUT_GENOME142289|MOTM01000070|10|7	SRR11450579|k141_3421_flag=1_multi=110.0000_len=8612	Pisuviricota	GUT_GENOME142330	d__Bacteria;p__Firmicutes_A;c__Clostridia;o__Peptostreptococcales;f__Peptostreptococcaceae;g__Clostridioides;s__Clostridioides difficile	38	4	1.19e-05
GUT_GENOME142289|MOTM01000070|10|7	SRR11450578|k141_2066_flag=1_multi=317.0000_len=8175	Pisuviricota	GUT_GENOME142330	d__Bacteria;p__Firmicutes_A;c__Clostridia;o__Peptostreptococcales;f__Peptostreptococcaceae;g__Clostridioides;s__Clostridioides difficile	38	4	1.19e-05
GUT_GENOME142289|MOTM01000070|10|7	SRR11450586|k141_213458_flag=1_multi=6442.8094_len=10045	Pisuviricota	GUT_GENOME142330	d__Bacteria;p__Firmicutes_A;c__Clostridia;o__Peptostreptococcales;f__Peptostreptococcaceae;g__Clostridioides;s__Clostridioides difficile	38	4	1.19e-05
GUT_GENOME142289|MOTM01000070|10|7	SRR11450579|k141_3421_flag=1_multi=110.0000_len=8612	Pisuviricota	GUT_GENOME142330	d__Bacteria;p__Firmicutes_A;c__Clostridia;o__Peptostreptococcales;f__Peptostreptococcaceae;g__Clostridioides;s__Clostridioides difficile	38	4	1.19e-05
GUT_GENOME142289|MOTM01000070|10|7	SRR5829926|k141_223325_flag=1_multi=36.0000_len=9335	Pisuviricota	GUT_GENOME142330	d__Bacteria;p__Firmicutes_A;c__Clostridia;o__Peptostreptococcales;f__Peptostreptococcaceae;g__Clostridioides;s__Clostridioides difficile	38	4	1.19e-05
GUT_GENOME142289|MOTM01000070|10|7	SRR10904365|k141_287437_flag=1_multi=32.0000_len=4454	Kitrinoviricota	GUT_GENOME142330	d__Bacteria;p__Firmicutes_A;c__Clostridia;o__Peptostreptococcales;f__Peptostreptococcaceae;g__Clostridioides;s__Clostridioides difficile	38	4	1.19e-05
GUT_GENOME142289|MOTM01000070|10|7	SRR11649087|k141_2929_flag=1_multi=251.0000_len=9689	Pisuviricota	GUT_GENOME142330	d__Bacteria;p__Firmicutes_A;c__Clostridia;o__Peptostreptococcales;f__Peptostreptococcaceae;g__Clostridioides;s__Clostridioides difficile	38	4	1.19e-05
GUT_GENOME142289|MOTM01000070|10|7	BC-0345318769|k141_41055	Pisuviricota	GUT_GENOME142330	d__Bacteria;p__Firmicutes_A;c__Clostridia;o__Peptostreptococcales;f__Peptostreptococcaceae;g__Clostridioides;s__Clostridioides difficile	38	4	1.19e-05
GUT_GENOME142289|MOTM01000070|10|7	BC-0302417267|k141_472	Kitrinoviricota	GUT_GENOME142330	d__Bacteria;p__Firmicutes_A;c__Clostridia;o__Peptostreptococcales;f__Peptostreptococcaceae;g__Clostridioides;s__Clostridioides difficile	38	4	1.19e-05
GUT_GENOME142289|MOTM01000070|10|7	SRR11829260|k141_2197_flag=1_multi=57.0000_len=4196	Kitrinoviricota	GUT_GENOME142330	d__Bacteria;p__Firmicutes_A;c__Clostridia;o__Peptostreptococcales;f__Peptostreptococcaceae;g__Clostridioides;s__Clostridioides difficile	38	4	1.19e-05
GUT_GENOME142289|MOTM01000070|10|7	SRR12685203|k141_1072_flag=1_multi=19.0000_len=4241	Kitrinoviricota	GUT_GENOME142330	d__Bacteria;p__Firmicutes_A;c__Clostridia;o__Peptostreptococcales;f__Peptostreptococcaceae;g__Clostridioides;s__Clostridioides difficile	38	4	1.19e-05
GUT_GENOME142289|MOTM01000070|10|7	SRR11450580|k141_109913_flag=1_multi=102.0000_len=6558	Pisuviricota	GUT_GENOME142330	d__Bacteria;p__Firmicutes_A;c__Clostridia;o__Peptostreptococcales;f__Peptostreptococcaceae;g__Clostridioides;s__Clostridioides difficile	38	4	1.19e-05
GUT_GENOME142289|MOTM01000070|10|7	SRR12685203|k141_1072_flag=1_multi=19.0000_len=4241	Kitrinoviricota	GUT_GENOME142330	d__Bacteria;p__Firmicutes_A;c__Clostridia;o__Peptostreptococcales;f__Peptostreptococcaceae;g__Clostridioides;s__Clostridioides difficile	38	4	1.19e-05
GUT_GENOME142289|MOTM01000070|10|7	SRR11648360|k141_2427_flag=0_multi=550.5579_len=8547	Pisuviricota	GUT_GENOME142330	d__Bacteria;p__Firmicutes_A;c__Clostridia;o__Peptostreptococcales;f__Peptostreptococcaceae;g__Clostridioides;s__Clostridioides difficile	38	4	1.19e-05
GUT_GENOME142289|MOTM01000070|10|7	SRR11649087|k141_2929_flag=1_multi=251.0000_len=9689	Pisuviricota	GUT_GENOME142330	d__Bacteria;p__Firmicutes_A;c__Clostridia;o__Peptostreptococcales;f__Peptostreptococcaceae;g__Clostridioides;s__Clostridioides difficile	38	4	1.19e-05
GUT_GENOME142289|MOTM01000070|10|7	BC-0345318742|k141_798	Duplornaviricota	GUT_GENOME142330	d__Bacteria;p__Firmicutes_A;c__Clostridia;o__Peptostreptococcales;f__Peptostreptococcaceae;g__Clostridioides;s__Clostridioides difficile	27	1	0.000154
GUT_GENOME142289|MOTM01000070|10|7	SRR11450580|k141_1194_flag=1_multi=129.0000_len=9098	Pisuviricota	GUT_GENOME142330	d__Bacteria;p__Firmicutes_A;c__Clostridia;o__Peptostreptococcales;f__Peptostreptococcaceae;g__Clostridioides;s__Clostridioides difficile	38	4	1.19e-05
GUT_GENOME142289|MOTM01000070|10|7	SRR12632510|k141_128094_flag=1_multi=39.9044_len=2003	Pisuviricota	GUT_GENOME142330	d__Bacteria;p__Firmicutes_A;c__Clostridia;o__Peptostreptococcales;f__Peptostreptococcaceae;g__Clostridioides;s__Clostridioides difficile	27	1	0.000154
GUT_GENOME142289|MOTM01000070|10|7	SRR11450577|k141_1033_flag=1_multi=59.9742_len=2428	Pisuviricota	GUT_GENOME142330	d__Bacteria;p__Firmicutes_A;c__Clostridia;o__Peptostreptococcales;f__Peptostreptococcaceae;g__Clostridioides;s__Clostridioides difficile	38	4	1.19e-05
GUT_GENOME142289|MOTM01000070|10|7	BC-0345318769|k141_41055	Pisuviricota	GUT_GENOME142330	d__Bacteria;p__Firmicutes_A;c__Clostridia;o__Peptostreptococcales;f__Peptostreptococcaceae;g__Clostridioides;s__Clostridioides difficile	38	4	1.19e-05
GUT_GENOME142289|MOTM01000070|10|7	BC-0332571705|k141_1013	Kitrinoviricota	GUT_GENOME142330	d__Bacteria;p__Firmicutes_A;c__Clostridia;o__Peptostreptococcales;f__Peptostreptococcaceae;g__Clostridioides;s__Clostridioides difficile	38	4	1.19e-05
GUT_GENOME142289|MOTM01000070|10|7	BC-0302417267|k141_472	Kitrinoviricota	GUT_GENOME142330	d__Bacteria;p__Firmicutes_A;c__Clostridia;o__Peptostreptococcales;f__Peptostreptococcaceae;g__Clostridioides;s__Clostridioides difficile	38	4	1.19e-05
GUT_GENOME142289|MOTM01000070|10|7	SRR8549887|k141_63205_flag=1_multi=3.8665_len=1444	Lenarviricota	GUT_GENOME142330	d__Bacteria;p__Firmicutes_A;c__Clostridia;o__Peptostreptococcales;f__Peptostreptococcaceae;g__Clostridioides;s__Clostridioides difficile	23	0	0.000555
GUT_GENOME142289|MOTM01000070|10|7	SRR11450580|k141_1194_flag=1_multi=129.0000_len=9098	Pisuviricota	GUT_GENOME142330	d__Bacteria;p__Firmicutes_A;c__Clostridia;o__Peptostreptococcales;f__Peptostreptococcaceae;g__Clostridioides;s__Clostridioides difficile	38	4	1.19e-05
GUT_GENOME142289|MOTM01000070|10|7	BC-0345649514|k141_807	Pisuviricota	GUT_GENOME142330	d__Bacteria;p__Firmicutes_A;c__Clostridia;o__Peptostreptococcales;f__Peptostreptococcaceae;g__Clostridioides;s__Clostridioides difficile	38	4	1.19e-05
GUT_GENOME142289|MOTM01000070|10|7	SRR11450580|k141_1194_flag=1_multi=129.0000_len=9098	Pisuviricota	GUT_GENOME142330	d__Bacteria;p__Firmicutes_A;c__Clostridia;o__Peptostreptococcales;f__Peptostreptococcaceae;g__Clostridioides;s__Clostridioides difficile	38	4	1.19e-05
GUT_GENOME142289|MOTM01000070|10|7	SRR18771403|k141_2176_flag=1_multi=18.0000_len=4094	Pisuviricota	GUT_GENOME142330	d__Bacteria;p__Firmicutes_A;c__Clostridia;o__Peptostreptococcales;f__Peptostreptococcaceae;g__Clostridioides;s__Clostridioides difficile	38	4	1.19e-05
GUT_GENOME142289|MOTM01000070|10|7	SRR11450579|k141_17049_flag=1_multi=4764.0000_len=8934	Pisuviricota	GUT_GENOME142330	d__Bacteria;p__Firmicutes_A;c__Clostridia;o__Peptostreptococcales;f__Peptostreptococcaceae;g__Clostridioides;s__Clostridioides difficile	38	4	1.19e-05
GUT_GENOME142289|MOTM01000070|10|7	SRR11649087|k141_263042_flag=1_multi=27.0000_len=4125	Kitrinoviricota	GUT_GENOME142330	d__Bacteria;p__Firmicutes_A;c__Clostridia;o__Peptostreptococcales;f__Peptostreptococcaceae;g__Clostridioides;s__Clostridioides difficile	38	4	1.19e-05
GUT_GENOME142289|MOTM01000070|10|7	SRR11450577|k141_1033_flag=1_multi=59.9742_len=2428	Pisuviricota	GUT_GENOME142330	d__Bacteria;p__Firmicutes_A;c__Clostridia;o__Peptostreptococcales;f__Peptostreptococcaceae;g__Clostridioides;s__Clostridioides difficile	38	4	1.19e-05
GUT_GENOME142289|MOTM01000070|10|7	SRR17481244|k141_434_flag=1_multi=161.0000_len=2746	Kitrinoviricota	GUT_GENOME142330	d__Bacteria;p__Firmicutes_A;c__Clostridia;o__Peptostreptococcales;f__Peptostreptococcaceae;g__Clostridioides;s__Clostridioides difficile	38	4	1.19e-05
GUT_GENOME142289|MOTM01000070|10|7	SRR11450585|k141_393922_flag=1_multi=11.9785_len=6779	Pisuviricota	GUT_GENOME142330	d__Bacteria;p__Firmicutes_A;c__Clostridia;o__Peptostreptococcales;f__Peptostreptococcaceae;g__Clostridioides;s__Clostridioides difficile	33	1	1.19e-05
GUT_GENOME142289|MOTM01000070|10|7	SRR11450579|k141_3421_flag=1_multi=110.0000_len=8612	Pisuviricota	GUT_GENOME142330	d__Bacteria;p__Firmicutes_A;c__Clostridia;o__Peptostreptococcales;f__Peptostreptococcaceae;g__Clostridioides;s__Clostridioides difficile	38	4	1.19e-05
GUT_GENOME142289|MOTM01000070|10|7	SRR11648360|k141_2427_flag=0_multi=550.5579_len=8547	Pisuviricota	GUT_GENOME142330	d__Bacteria;p__Firmicutes_A;c__Clostridia;o__Peptostreptococcales;f__Peptostreptococcaceae;g__Clostridioides;s__Clostridioides difficile	38	4	1.19e-05
GUT_GENOME142289|MOTM01000070|10|7	SRR11450579|k141_76622_flag=1_multi=211.0000_len=8995	Pisuviricota	GUT_GENOME142330	d__Bacteria;p__Firmicutes_A;c__Clostridia;o__Peptostreptococcales;f__Peptostreptococcaceae;g__Clostridioides;s__Clostridioides difficile	38	4	1.19e-05
GUT_GENOME142289|MOTM01000070|10|7	SRR11450580|k141_1194_flag=1_multi=129.0000_len=9098	Pisuviricota	GUT_GENOME142330	d__Bacteria;p__Firmicutes_A;c__Clostridia;o__Peptostreptococcales;f__Peptostreptococcaceae;g__Clostridioides;s__Clostridioides difficile	38	4	1.19e-05
GUT_GENOME142289|MOTM01000070|10|7	SRR18771403|k141_2176_flag=1_multi=18.0000_len=4094	Pisuviricota	GUT_GENOME142330	d__Bacteria;p__Firmicutes_A;c__Clostridia;o__Peptostreptococcales;f__Peptostreptococcaceae;g__Clostridioides;s__Clostridioides difficile	38	4	1.19e-05
GUT_GENOME142289|MOTM01000070|10|7	SRR11450580|k141_288389_flag=1_multi=108.0000_len=9065	Pisuviricota	GUT_GENOME142330	d__Bacteria;p__Firmicutes_A;c__Clostridia;o__Peptostreptococcales;f__Peptostreptococcaceae;g__Clostridioides;s__Clostridioides difficile	27	1	0.000154
GUT_GENOME142289|MOTM01000070|10|7	BC-0345724490|k141_9515	Duplornaviricota	GUT_GENOME142330	d__Bacteria;p__Firmicutes_A;c__Clostridia;o__Peptostreptococcales;f__Peptostreptococcaceae;g__Clostridioides;s__Clostridioides difficile	38	4	1.19e-05
GUT_GENOME142289|MOTM01000070|10|7	SRR11450586|k141_213458_flag=1_multi=6442.8094_len=10045	Pisuviricota	GUT_GENOME142330	d__Bacteria;p__Firmicutes_A;c__Clostridia;o__Peptostreptococcales;f__Peptostreptococcaceae;g__Clostridioides;s__Clostridioides difficile	38	4	1.19e-05
GUT_GENOME142289|MOTM01000070|10|7	SRR11648360|k141_187449_flag=1_multi=2812.0000_len=9848	Pisuviricota	GUT_GENOME142330	d__Bacteria;p__Firmicutes_A;c__Clostridia;o__Peptostreptococcales;f__Peptostreptococcaceae;g__Clostridioides;s__Clostridioides difficile	38	4	1.19e-05
GUT_GENOME142289|MOTM01000070|10|7	SRR11450579|k141_3421_flag=1_multi=110.0000_len=8612	Pisuviricota	GUT_GENOME142330	d__Bacteria;p__Firmicutes_A;c__Clostridia;o__Peptostreptococcales;f__Peptostreptococcaceae;g__Clostridioides;s__Clostridioides difficile	38	4	1.19e-05
GUT_GENOME142289|MOTM01000070|10|7	BC-0345318742|k141_63184	Pisuviricota	GUT_GENOME142330	d__Bacteria;p__Firmicutes_A;c__Clostridia;o__Peptostreptococcales;f__Peptostreptococcaceae;g__Clostridioides;s__Clostridioides difficile	36	3	3.32e-06
GUT_GENOME142289|MOTM01000070|10|7	SRR5829926|k141_223325_flag=1_multi=36.0000_len=9335	Pisuviricota	GUT_GENOME142330	d__Bacteria;p__Firmicutes_A;c__Clostridia;o__Peptostreptococcales;f__Peptostreptococcaceae;g__Clostridioides;s__Clostridioides difficile	38	4	1.19e-05
GUT_GENOME142289|MOTM01000070|10|7	SRR1582003|k119_19133_flag=1_multi=19.0000_len=2048	Unclassified	GUT_GENOME142330	d__Bacteria;p__Firmicutes_A;c__Clostridia;o__Peptostreptococcales;f__Peptostreptococcaceae;g__Clostridioides;s__Clostridioides difficile	24	0	0.000154
GUT_GENOME142289|MOTM01000070|10|7	SRR11648202|k141_322_flag=0_multi=521.7310_len=1955	Pisuviricota	GUT_GENOME142330	d__Bacteria;p__Firmicutes_A;c__Clostridia;o__Peptostreptococcales;f__Peptostreptococcaceae;g__Clostridioides;s__Clostridioides difficile	38	4	1.19e-05
GUT_GENOME142289|MOTM01000070|10|7	SRR11649087|k141_2929_flag=1_multi=251.0000_len=9689	Pisuviricota	GUT_GENOME142330	d__Bacteria;p__Firmicutes_A;c__Clostridia;o__Peptostreptococcales;f__Peptostreptococcaceae;g__Clostridioides;s__Clostridioides difficile	38	4	1.19e-05
GUT_GENOME142289|MOTM01000070|10|7	SRR11450580|k141_109913_flag=1_multi=102.0000_len=6558	Pisuviricota	GUT_GENOME142330	d__Bacteria;p__Firmicutes_A;c__Clostridia;o__Peptostreptococcales;f__Peptostreptococcaceae;g__Clostridioides;s__Clostridioides difficile	38	4	1.19e-05
GUT_GENOME142289|MOTM01000070|10|7	SRR11648360|k141_187449_flag=1_multi=2812.0000_len=9848	Pisuviricota	GUT_GENOME142330	d__Bacteria;p__Firmicutes_A;c__Clostridia;o__Peptostreptococcales;f__Peptostreptococcaceae;g__Clostridioides;s__Clostridioides difficile	38	4	1.19e-05
GUT_GENOME142289|MOTM01000070|10|7	SRR18770918|k141_15596_flag=1_multi=75.0000_len=10756	Kitrinoviricota	GUT_GENOME142330	d__Bacteria;p__Firmicutes_A;c__Clostridia;o__Peptostreptococcales;f__Peptostreptococcaceae;g__Clostridioides;s__Clostridioides difficile	23	0	0.000555
GUT_GENOME142289|MOTM01000070|10|7	SRR18771403|k141_131354_flag=1_multi=48.8407_len=10690	Pisuviricota	GUT_GENOME142330	d__Bacteria;p__Firmicutes_A;c__Clostridia;o__Peptostreptococcales;f__Peptostreptococcaceae;g__Clostridioides;s__Clostridioides difficile	38	4	1.19e-05
GUT_GENOME142289|MOTM01000070|10|7	BC-0302417267|k141_472	Kitrinoviricota	GUT_GENOME142330	d__Bacteria;p__Firmicutes_A;c__Clostridia;o__Peptostreptococcales;f__Peptostreptococcaceae;g__Clostridioides;s__Clostridioides difficile	38	4	1.19e-05
GUT_GENOME142289|MOTM01000070|10|7	SRR11450578|k141_2066_flag=1_multi=317.0000_len=8175	Pisuviricota	GUT_GENOME142330	d__Bacteria;p__Firmicutes_A;c__Clostridia;o__Peptostreptococcales;f__Peptostreptococcaceae;g__Clostridioides;s__Clostridioides difficile	38	4	1.19e-05
GUT_GENOME142289|MOTM01000070|10|7	SRR11450578|k141_2066_flag=1_multi=317.0000_len=8175	Pisuviricota	GUT_GENOME142330	d__Bacteria;p__Firmicutes_A;c__Clostridia;o__Peptostreptococcales;f__Peptostreptococcaceae;g__Clostridioides;s__Clostridioides difficile	38	4	1.19e-05
GUT_GENOME142289|MOTM01000070|10|7	SRR18771403|k141_22621_flag=1_multi=91.4202_len=8303	Pisuviricota	GUT_GENOME142330	d__Bacteria;p__Firmicutes_A;c__Clostridia;o__Peptostreptococcales;f__Peptostreptococcaceae;g__Clostridioides;s__Clostridioides difficile	27	0	0.000555
GUT_GENOME142289|MOTM01000070|10|7	SRR11450579|k141_17049_flag=1_multi=4764.0000_len=8934	Pisuviricota	GUT_GENOME142330	d__Bacteria;p__Firmicutes_A;c__Clostridia;o__Peptostreptococcales;f__Peptostreptococcaceae;g__Clostridioides;s__Clostridioides difficile	38	4	1.19e-05
GUT_GENOME142289|MOTM01000070|10|7	BC-0345649514|k141_807	Pisuviricota	GUT_GENOME142330	d__Bacteria;p__Firmicutes_A;c__Clostridia;o__Peptostreptococcales;f__Peptostreptococcaceae;g__Clostridioides;s__Clostridioides difficile	38	4	1.19e-05
GUT_GENOME142289|MOTM01000070|10|7	SRR11450577|k141_1033_flag=1_multi=59.9742_len=2428	Pisuviricota	GUT_GENOME142330	d__Bacteria;p__Firmicutes_A;c__Clostridia;o__Peptostreptococcales;f__Peptostreptococcaceae;g__Clostridioides;s__Clostridioides difficile	38	4	1.19e-05
GUT_GENOME142289|MOTM01000070|10|7	BC-0345649514|k141_807	Pisuviricota	GUT_GENOME142330	d__Bacteria;p__Firmicutes_A;c__Clostridia;o__Peptostreptococcales;f__Peptostreptococcaceae;g__Clostridioides;s__Clostridioides difficile	38	4	1.19e-05
GUT_GENOME142289|MOTM01000070|10|7	SRR11829143|k141_119731_flag=1_multi=545.5096_len=9090	Pisuviricota	GUT_GENOME142330	d__Bacteria;p__Firmicutes_A;c__Clostridia;o__Peptostreptococcales;f__Peptostreptococcaceae;g__Clostridioides;s__Clostridioides difficile	38	4	1.19e-05
GUT_GENOME142289|MOTM01000070|10|7	SRR11563379|k141_984_flag=1_multi=10.0000_len=5356	Pisuviricota	GUT_GENOME142330	d__Bacteria;p__Firmicutes_A;c__Clostridia;o__Peptostreptococcales;f__Peptostreptococcaceae;g__Clostridioides;s__Clostridioides difficile	38	4	1.19e-05
GUT_GENOME142289|MOTM01000070|10|7	BC-0302413540|k141_158	Kitrinoviricota	GUT_GENOME142330	d__Bacteria;p__Firmicutes_A;c__Clostridia;o__Peptostreptococcales;f__Peptostreptococcaceae;g__Clostridioides;s__Clostridioides difficile	38	4	1.19e-05
GUT_GENOME142289|MOTM01000070|10|7	SRR11829260|k141_2197_flag=1_multi=57.0000_len=4196	Kitrinoviricota	GUT_GENOME142330	d__Bacteria;p__Firmicutes_A;c__Clostridia;o__Peptostreptococcales;f__Peptostreptococcaceae;g__Clostridioides;s__Clostridioides difficile	38	4	1.19e-05
GUT_GENOME142289|MOTM01000070|10|7	SRR11450579|k141_3421_flag=1_multi=110.0000_len=8612	Pisuviricota	GUT_GENOME142330	d__Bacteria;p__Firmicutes_A;c__Clostridia;o__Peptostreptococcales;f__Peptostreptococcaceae;g__Clostridioides;s__Clostridioides difficile	38	4	1.19e-05
GUT_GENOME142289|MOTM01000070|10|7	SRR10904365|k141_287437_flag=1_multi=32.0000_len=4454	Kitrinoviricota	GUT_GENOME142330	d__Bacteria;p__Firmicutes_A;c__Clostridia;o__Peptostreptococcales;f__Peptostreptococcaceae;g__Clostridioides;s__Clostridioides difficile	38	4	1.19e-05
GUT_GENOME142289|MOTM01000070|10|7	SRR17481244|k141_434_flag=1_multi=161.0000_len=2746	Kitrinoviricota	GUT_GENOME142330	d__Bacteria;p__Firmicutes_A;c__Clostridia;o__Peptostreptococcales;f__Peptostreptococcaceae;g__Clostridioides;s__Clostridioides difficile	38	4	1.19e-05
GUT_GENOME142289|MOTM01000070|10|7	BC-0302413540|k141_158	Kitrinoviricota	GUT_GENOME142330	d__Bacteria;p__Firmicutes_A;c__Clostridia;o__Peptostreptococcales;f__Peptostreptococcaceae;g__Clostridioides;s__Clostridioides difficile	38	4	1.19e-05
GUT_GENOME142289|MOTM01000070|10|7	SRR11450580|k141_109913_flag=1_multi=102.0000_len=6558	Pisuviricota	GUT_GENOME142330	d__Bacteria;p__Firmicutes_A;c__Clostridia;o__Peptostreptococcales;f__Peptostreptococcaceae;g__Clostridioides;s__Clostridioides difficile	38	4	1.19e-05
GUT_GENOME142289|MOTM01000070|10|7	SRR11450577|k141_1033_flag=1_multi=59.9742_len=2428	Pisuviricota	GUT_GENOME142330	d__Bacteria;p__Firmicutes_A;c__Clostridia;o__Peptostreptococcales;f__Peptostreptococcaceae;g__Clostridioides;s__Clostridioides difficile	38	4	1.19e-05
GUT_GENOME142289|MOTM01000070|10|7	SRR5829926|k141_223325_flag=1_multi=36.0000_len=9335	Pisuviricota	GUT_GENOME142330	d__Bacteria;p__Firmicutes_A;c__Clostridia;o__Peptostreptococcales;f__Peptostreptococcaceae;g__Clostridioides;s__Clostridioides difficile	38	4	1.19e-05
GUT_GENOME142289|MOTM01000070|10|7	SRR18771403|k141_2176_flag=1_multi=18.0000_len=4094	Pisuviricota	GUT_GENOME142330	d__Bacteria;p__Firmicutes_A;c__Clostridia;o__Peptostreptococcales;f__Peptostreptococcaceae;g__Clostridioides;s__Clostridioides difficile	38	4	1.19e-05
GUT_GENOME142289|MOTM01000070|10|7	SRR11450579|k141_17049_flag=1_multi=4764.0000_len=8934	Pisuviricota	GUT_GENOME142330	d__Bacteria;p__Firmicutes_A;c__Clostridia;o__Peptostreptococcales;f__Peptostreptococcaceae;g__Clostridioides;s__Clostridioides difficile	38	4	1.19e-05
GUT_GENOME142289|MOTM01000070|10|7	SRR11648360|k141_2427_flag=0_multi=550.5579_len=8547	Pisuviricota	GUT_GENOME142330	d__Bacteria;p__Firmicutes_A;c__Clostridia;o__Peptostreptococcales;f__Peptostreptococcaceae;g__Clostridioides;s__Clostridioides difficile	38	4	1.19e-05
GUT_GENOME142289|MOTM01000070|10|7	SRR5829926|k141_223325_flag=1_multi=36.0000_len=9335	Pisuviricota	GUT_GENOME142330	d__Bacteria;p__Firmicutes_A;c__Clostridia;o__Peptostreptococcales;f__Peptostreptococcaceae;g__Clostridioides;s__Clostridioides difficile	38	4	1.19e-05
GUT_GENOME142289|MOTM01000070|10|7	SRR10849374|k141_328568_flag=1_multi=20.0000_len=3015	Lenarviricota	GUT_GENOME142330	d__Bacteria;p__Firmicutes_A;c__Clostridia;o__Peptostreptococcales;f__Peptostreptococcaceae;g__Clostridioides;s__Clostridioides difficile	38	4	1.19e-05
GUT_GENOME142289|MOTM01000070|10|7	BC-0345318769|k141_41055	Pisuviricota	GUT_GENOME142330	d__Bacteria;p__Firmicutes_A;c__Clostridia;o__Peptostreptococcales;f__Peptostreptococcaceae;g__Clostridioides;s__Clostridioides difficile	38	4	1.19e-05
GUT_GENOME142289|MOTM01000070|10|7	BC-0345732070|k141_514	Pisuviricota	GUT_GENOME142330	d__Bacteria;p__Firmicutes_A;c__Clostridia;o__Peptostreptococcales;f__Peptostreptococcaceae;g__Clostridioides;s__Clostridioides difficile	38	1	0.000154
GUT_GENOME142289|MOTM01000070|10|7	SRR11563379|k141_984_flag=1_multi=10.0000_len=5356	Pisuviricota	GUT_GENOME142330	d__Bacteria;p__Firmicutes_A;c__Clostridia;o__Peptostreptococcales;f__Peptostreptococcaceae;g__Clostridioides;s__Clostridioides difficile	38	4	1.19e-05
GUT_GENOME142289|MOTM01000070|10|7	SRR11829143|k141_119731_flag=1_multi=545.5096_len=9090	Pisuviricota	GUT_GENOME142330	d__Bacteria;p__Firmicutes_A;c__Clostridia;o__Peptostreptococcales;f__Peptostreptococcaceae;g__Clostridioides;s__Clostridioides difficile	38	4	1.19e-05
GUT_GENOME142289|MOTM01000070|10|7	SRR11450580|k141_288389_flag=1_multi=108.0000_len=9065	Pisuviricota	GUT_GENOME142330	d__Bacteria;p__Firmicutes_A;c__Clostridia;o__Peptostreptococcales;f__Peptostreptococcaceae;g__Clostridioides;s__Clostridioides difficile	27	1	0.000154
GUT_GENOME142289|MOTM01000070|10|7	BC-0345649514|k141_807	Pisuviricota	GUT_GENOME142330	d__Bacteria;p__Firmicutes_A;c__Clostridia;o__Peptostreptococcales;f__Peptostreptococcaceae;g__Clostridioides;s__Clostridioides difficile	38	4	1.19e-05
GUT_GENOME142289|MOTM01000070|10|7	SRR11647857|k141_256089_flag=1_multi=53.7354_len=5197	Kitrinoviricota	GUT_GENOME142330	d__Bacteria;p__Firmicutes_A;c__Clostridia;o__Peptostreptococcales;f__Peptostreptococcaceae;g__Clostridioides;s__Clostridioides difficile	27	0	0.000555
GUT_GENOME142289|MOTM01000070|10|7	SRR11563379|k141_984_flag=1_multi=10.0000_len=5356	Pisuviricota	GUT_GENOME142330	d__Bacteria;p__Firmicutes_A;c__Clostridia;o__Peptostreptococcales;f__Peptostreptococcaceae;g__Clostridioides;s__Clostridioides difficile	38	4	1.19e-05
GUT_GENOME142289|MOTM01000070|10|7	SRR12632510|k141_128094_flag=1_multi=39.9044_len=2003	Pisuviricota	GUT_GENOME142330	d__Bacteria;p__Firmicutes_A;c__Clostridia;o__Peptostreptococcales;f__Peptostreptococcaceae;g__Clostridioides;s__Clostridioides difficile	27	1	0.000154
GUT_GENOME142289|MOTM01000070|10|7	SRR5829926|k141_223325_flag=1_multi=36.0000_len=9335	Pisuviricota	GUT_GENOME142330	d__Bacteria;p__Firmicutes_A;c__Clostridia;o__Peptostreptococcales;f__Peptostreptococcaceae;g__Clostridioides;s__Clostridioides difficile	38	4	1.19e-05
GUT_GENOME142289|MOTM01000070|10|7	SRR17509979|k141_28799_flag=1_multi=182.0000_len=1917	Pisuviricota	GUT_GENOME142330	d__Bacteria;p__Firmicutes_A;c__Clostridia;o__Peptostreptococcales;f__Peptostreptococcaceae;g__Clostridioides;s__Clostridioides difficile	25	0	4.29e-05
GUT_GENOME142289|MOTM01000070|10|7	SRR11829143|k141_119731_flag=1_multi=545.5096_len=9090	Pisuviricota	GUT_GENOME142330	d__Bacteria;p__Firmicutes_A;c__Clostridia;o__Peptostreptococcales;f__Peptostreptococcaceae;g__Clostridioides;s__Clostridioides difficile	38	4	1.19e-05
GUT_GENOME142289|MOTM01000070|10|7	SRR11648202|k141_322_flag=0_multi=521.7310_len=1955	Pisuviricota	GUT_GENOME142330	d__Bacteria;p__Firmicutes_A;c__Clostridia;o__Peptostreptococcales;f__Peptostreptococcaceae;g__Clostridioides;s__Clostridioides difficile	38	4	1.19e-05
GUT_GENOME142289|MOTM01000070|10|7	SRR11828900|k141_55027_flag=1_multi=15.0000_len=8550	Pisuviricota	GUT_GENOME142330	d__Bacteria;p__Firmicutes_A;c__Clostridia;o__Peptostreptococcales;f__Peptostreptococcaceae;g__Clostridioides;s__Clostridioides difficile	38	4	1.19e-05
GUT_GENOME142289|MOTM01000070|10|7	SRR11648360|k141_187449_flag=1_multi=2812.0000_len=9848	Pisuviricota	GUT_GENOME142330	d__Bacteria;p__Firmicutes_A;c__Clostridia;o__Peptostreptococcales;f__Peptostreptococcaceae;g__Clostridioides;s__Clostridioides difficile	38	4	1.19e-05
GUT_GENOME142289|MOTM01000070|10|7	SRR11649087|k141_2929_flag=1_multi=251.0000_len=9689	Pisuviricota	GUT_GENOME142330	d__Bacteria;p__Firmicutes_A;c__Clostridia;o__Peptostreptococcales;f__Peptostreptococcaceae;g__Clostridioides;s__Clostridioides difficile	38	4	1.19e-05
GUT_GENOME142289|MOTM01000070|10|7	BC-0332571705|k141_1013	Kitrinoviricota	GUT_GENOME142330	d__Bacteria;p__Firmicutes_A;c__Clostridia;o__Peptostreptococcales;f__Peptostreptococcaceae;g__Clostridioides;s__Clostridioides difficile	38	4	1.19e-05
GUT_GENOME142289|MOTM01000070|10|7	SRR11450586|k141_213458_flag=1_multi=6442.8094_len=10045	Pisuviricota	GUT_GENOME142330	d__Bacteria;p__Firmicutes_A;c__Clostridia;o__Peptostreptococcales;f__Peptostreptococcaceae;g__Clostridioides;s__Clostridioides difficile	38	4	1.19e-05
GUT_GENOME142289|MOTM01000070|10|7	SRR11829260|k141_2197_flag=1_multi=57.0000_len=4196	Kitrinoviricota	GUT_GENOME142330	d__Bacteria;p__Firmicutes_A;c__Clostridia;o__Peptostreptococcales;f__Peptostreptococcaceae;g__Clostridioides;s__Clostridioides difficile	38	4	1.19e-05
GUT_GENOME142289|MOTM01000070|10|7	SRR11648360|k141_187449_flag=1_multi=2812.0000_len=9848	Pisuviricota	GUT_GENOME142330	d__Bacteria;p__Firmicutes_A;c__Clostridia;o__Peptostreptococcales;f__Peptostreptococcaceae;g__Clostridioides;s__Clostridioides difficile	38	4	1.19e-05
GUT_GENOME142289|MOTM01000070|10|7	SRR11828900|k141_55027_flag=1_multi=15.0000_len=8550	Pisuviricota	GUT_GENOME142330	d__Bacteria;p__Firmicutes_A;c__Clostridia;o__Peptostreptococcales;f__Peptostreptococcaceae;g__Clostridioides;s__Clostridioides difficile	38	4	1.19e-05
GUT_GENOME142289|MOTM01000070|10|7	SRR18771337|k141_6955_flag=1_multi=101.0000_len=2265	Pisuviricota	GUT_GENOME142330	d__Bacteria;p__Firmicutes_A;c__Clostridia;o__Peptostreptococcales;f__Peptostreptococcaceae;g__Clostridioides;s__Clostridioides difficile	33	3	0.000154
GUT_GENOME142289|MOTM01000070|10|7	SRR18770930|k141_113835_flag=1_multi=9.0000_len=1095	Pisuviricota	GUT_GENOME142330	d__Bacteria;p__Firmicutes_A;c__Clostridia;o__Peptostreptococcales;f__Peptostreptococcaceae;g__Clostridioides;s__Clostridioides difficile	23	0	0.000555
GUT_GENOME142289|MOTM01000070|10|7	SRR5829926|k141_235250_flag=1_multi=9.0000_len=9051	Pisuviricota	GUT_GENOME142330	d__Bacteria;p__Firmicutes_A;c__Clostridia;o__Peptostreptococcales;f__Peptostreptococcaceae;g__Clostridioides;s__Clostridioides difficile	28	1	4.29e-05
GUT_GENOME142289|MOTM01000070|10|7	SRR11649087|k141_263042_flag=1_multi=27.0000_len=4125	Kitrinoviricota	GUT_GENOME142330	d__Bacteria;p__Firmicutes_A;c__Clostridia;o__Peptostreptococcales;f__Peptostreptococcaceae;g__Clostridioides;s__Clostridioides difficile	38	4	1.19e-05
GUT_GENOME142289|MOTM01000070|10|7	SRR10904365|k141_287437_flag=1_multi=32.0000_len=4454	Kitrinoviricota	GUT_GENOME142330	d__Bacteria;p__Firmicutes_A;c__Clostridia;o__Peptostreptococcales;f__Peptostreptococcaceae;g__Clostridioides;s__Clostridioides difficile	38	4	1.19e-05
GUT_GENOME142289|MOTM01000070|10|7	SRR18771403|k141_2176_flag=1_multi=18.0000_len=4094	Pisuviricota	GUT_GENOME142330	d__Bacteria;p__Firmicutes_A;c__Clostridia;o__Peptostreptococcales;f__Peptostreptococcaceae;g__Clostridioides;s__Clostridioides difficile	38	4	1.19e-05
GUT_GENOME142289|MOTM01000070|10|7	SRR11649087|k141_2929_flag=1_multi=251.0000_len=9689	Pisuviricota	GUT_GENOME142330	d__Bacteria;p__Firmicutes_A;c__Clostridia;o__Peptostreptococcales;f__Peptostreptococcaceae;g__Clostridioides;s__Clostridioides difficile	38	4	1.19e-05
GUT_GENOME142289|MOTM01000070|10|7	SRR10904365|k141_287437_flag=1_multi=32.0000_len=4454	Kitrinoviricota	GUT_GENOME142330	d__Bacteria;p__Firmicutes_A;c__Clostridia;o__Peptostreptococcales;f__Peptostreptococcaceae;g__Clostridioides;s__Clostridioides difficile	38	4	1.19e-05
GUT_GENOME142289|MOTM01000070|10|7	SRR11450580|k141_109913_flag=1_multi=102.0000_len=6558	Pisuviricota	GUT_GENOME142330	d__Bacteria;p__Firmicutes_A;c__Clostridia;o__Peptostreptococcales;f__Peptostreptococcaceae;g__Clostridioides;s__Clostridioides difficile	38	4	1.19e-05
GUT_GENOME142289|MOTM01000070|10|7	SRR11563379|k141_984_flag=1_multi=10.0000_len=5356	Pisuviricota	GUT_GENOME142330	d__Bacteria;p__Firmicutes_A;c__Clostridia;o__Peptostreptococcales;f__Peptostreptococcaceae;g__Clostridioides;s__Clostridioides difficile	38	4	1.19e-05
GUT_GENOME142289|MOTM01000070|10|7	SRR10904365|k141_287437_flag=1_multi=32.0000_len=4454	Kitrinoviricota	GUT_GENOME142330	d__Bacteria;p__Firmicutes_A;c__Clostridia;o__Peptostreptococcales;f__Peptostreptococcaceae;g__Clostridioides;s__Clostridioides difficile	38	4	1.19e-05
GUT_GENOME142289|MOTM01000070|10|7	SRR11649087|k141_263042_flag=1_multi=27.0000_len=4125	Kitrinoviricota	GUT_GENOME142330	d__Bacteria;p__Firmicutes_A;c__Clostridia;o__Peptostreptococcales;f__Peptostreptococcaceae;g__Clostridioides;s__Clostridioides difficile	38	4	1.19e-05
GUT_GENOME142289|MOTM01000070|10|7	BC-0332571705|k141_1013	Kitrinoviricota	GUT_GENOME142330	d__Bacteria;p__Firmicutes_A;c__Clostridia;o__Peptostreptococcales;f__Peptostreptococcaceae;g__Clostridioides;s__Clostridioides difficile	38	4	1.19e-05
GUT_GENOME142289|MOTM01000070|10|7	SRR11828900|k141_55027_flag=1_multi=15.0000_len=8550	Pisuviricota	GUT_GENOME142330	d__Bacteria;p__Firmicutes_A;c__Clostridia;o__Peptostreptococcales;f__Peptostreptococcaceae;g__Clostridioides;s__Clostridioides difficile	38	4	1.19e-05
GUT_GENOME142289|MOTM01000070|10|7	SRR11648360|k141_2427_flag=0_multi=550.5579_len=8547	Pisuviricota	GUT_GENOME142330	d__Bacteria;p__Firmicutes_A;c__Clostridia;o__Peptostreptococcales;f__Peptostreptococcaceae;g__Clostridioides;s__Clostridioides difficile	38	4	1.19e-05
GUT_GENOME142289|MOTM01000070|10|7	SRR18771403|k141_2176_flag=1_multi=18.0000_len=4094	Pisuviricota	GUT_GENOME142330	d__Bacteria;p__Firmicutes_A;c__Clostridia;o__Peptostreptococcales;f__Peptostreptococcaceae;g__Clostridioides;s__Clostridioides difficile	38	4	1.19e-05
GUT_GENOME142289|MOTM01000070|10|7	BC-0345724490|k141_9515	Duplornaviricota	GUT_GENOME142330	d__Bacteria;p__Firmicutes_A;c__Clostridia;o__Peptostreptococcales;f__Peptostreptococcaceae;g__Clostridioides;s__Clostridioides difficile	38	4	1.19e-05
GUT_GENOME142289|MOTM01000070|10|7	BC-0345318769|k141_41055	Pisuviricota	GUT_GENOME142330	d__Bacteria;p__Firmicutes_A;c__Clostridia;o__Peptostreptococcales;f__Peptostreptococcaceae;g__Clostridioides;s__Clostridioides difficile	38	4	1.19e-05
GUT_GENOME142289|MOTM01000070|10|7	SRR11648176|k141_1576_flag=1_multi=88.2328_len=8707	Pisuviricota	GUT_GENOME142330	d__Bacteria;p__Firmicutes_A;c__Clostridia;o__Peptostreptococcales;f__Peptostreptococcaceae;g__Clostridioides;s__Clostridioides difficile	33	3	0.000154
GUT_GENOME142289|MOTM01000070|10|7	SRR11829260|k141_2197_flag=1_multi=57.0000_len=4196	Kitrinoviricota	GUT_GENOME142330	d__Bacteria;p__Firmicutes_A;c__Clostridia;o__Peptostreptococcales;f__Peptostreptococcaceae;g__Clostridioides;s__Clostridioides difficile	38	4	1.19e-05
GUT_GENOME142289|MOTM01000070|10|7	BC-0332571705|k141_1013	Kitrinoviricota	GUT_GENOME142330	d__Bacteria;p__Firmicutes_A;c__Clostridia;o__Peptostreptococcales;f__Peptostreptococcaceae;g__Clostridioides;s__Clostridioides difficile	38	4	1.19e-05
GUT_GENOME142289|MOTM01000070|10|7	BC-0345317873|k141_88724	Pisuviricota	GUT_GENOME142330	d__Bacteria;p__Firmicutes_A;c__Clostridia;o__Peptostreptococcales;f__Peptostreptococcaceae;g__Clostridioides;s__Clostridioides difficile	27	1	0.000154
GUT_GENOME142289|MOTM01000070|10|7	SRR12685203|k141_1072_flag=1_multi=19.0000_len=4241	Kitrinoviricota	GUT_GENOME142330	d__Bacteria;p__Firmicutes_A;c__Clostridia;o__Peptostreptococcales;f__Peptostreptococcaceae;g__Clostridioides;s__Clostridioides difficile	38	4	1.19e-05
GUT_GENOME142289|MOTM01000070|10|7	SRR11829260|k141_2197_flag=1_multi=57.0000_len=4196	Kitrinoviricota	GUT_GENOME142330	d__Bacteria;p__Firmicutes_A;c__Clostridia;o__Peptostreptococcales;f__Peptostreptococcaceae;g__Clostridioides;s__Clostridioides difficile	38	4	1.19e-05
GUT_GENOME142289|MOTM01000070|10|7	SRR11648360|k141_187449_flag=1_multi=2812.0000_len=9848	Pisuviricota	GUT_GENOME142330	d__Bacteria;p__Firmicutes_A;c__Clostridia;o__Peptostreptococcales;f__Peptostreptococcaceae;g__Clostridioides;s__Clostridioides difficile	38	4	1.19e-05
GUT_GENOME142289|MOTM01000070|10|7	SRR11829260|k141_2197_flag=1_multi=57.0000_len=4196	Kitrinoviricota	GUT_GENOME142330	d__Bacteria;p__Firmicutes_A;c__Clostridia;o__Peptostreptococcales;f__Peptostreptococcaceae;g__Clostridioides;s__Clostridioides difficile	38	4	1.19e-05
GUT_GENOME142289|MOTM01000070|10|7	SRR11829143|k141_119731_flag=1_multi=545.5096_len=9090	Pisuviricota	GUT_GENOME142330	d__Bacteria;p__Firmicutes_A;c__Clostridia;o__Peptostreptococcales;f__Peptostreptococcaceae;g__Clostridioides;s__Clostridioides difficile	38	4	1.19e-05
GUT_GENOME142289|MOTM01000070|10|7	SRR18771403|k141_12334_flag=1_multi=224.0000_len=9334	Pisuviricota	GUT_GENOME142330	d__Bacteria;p__Firmicutes_A;c__Clostridia;o__Peptostreptococcales;f__Peptostreptococcaceae;g__Clostridioides;s__Clostridioides difficile	27	1	0.000154
GUT_GENOME142289|MOTM01000070|10|7	SRR11450580|k141_288389_flag=1_multi=108.0000_len=9065	Pisuviricota	GUT_GENOME142330	d__Bacteria;p__Firmicutes_A;c__Clostridia;o__Peptostreptococcales;f__Peptostreptococcaceae;g__Clostridioides;s__Clostridioides difficile	27	1	0.000154
GUT_GENOME142289|MOTM01000070|10|7	BC-0302413540|k141_158	Kitrinoviricota	GUT_GENOME142330	d__Bacteria;p__Firmicutes_A;c__Clostridia;o__Peptostreptococcales;f__Peptostreptococcaceae;g__Clostridioides;s__Clostridioides difficile	38	4	1.19e-05
GUT_GENOME142289|MOTM01000070|10|7	SRR11648202|k141_322_flag=0_multi=521.7310_len=1955	Pisuviricota	GUT_GENOME142330	d__Bacteria;p__Firmicutes_A;c__Clostridia;o__Peptostreptococcales;f__Peptostreptococcaceae;g__Clostridioides;s__Clostridioides difficile	38	4	1.19e-05
GUT_GENOME142289|MOTM01000070|10|7	SRR17481244|k141_434_flag=1_multi=161.0000_len=2746	Kitrinoviricota	GUT_GENOME142330	d__Bacteria;p__Firmicutes_A;c__Clostridia;o__Peptostreptococcales;f__Peptostreptococcaceae;g__Clostridioides;s__Clostridioides difficile	38	4	1.19e-05
GUT_GENOME142289|MOTM01000070|10|7	BC-0345698157|k141_28560	Pisuviricota	GUT_GENOME142330	d__Bacteria;p__Firmicutes_A;c__Clostridia;o__Peptostreptococcales;f__Peptostreptococcaceae;g__Clostridioides;s__Clostridioides difficile	38	4	1.19e-05
GUT_GENOME142289|MOTM01000070|10|7	SRR11450580|k141_1194_flag=1_multi=129.0000_len=9098	Pisuviricota	GUT_GENOME142330	d__Bacteria;p__Firmicutes_A;c__Clostridia;o__Peptostreptococcales;f__Peptostreptococcaceae;g__Clostridioides;s__Clostridioides difficile	38	4	1.19e-05
GUT_GENOME142289|MOTM01000070|10|7	SRR11450580|k141_1194_flag=1_multi=129.0000_len=9098	Pisuviricota	GUT_GENOME142330	d__Bacteria;p__Firmicutes_A;c__Clostridia;o__Peptostreptococcales;f__Peptostreptococcaceae;g__Clostridioides;s__Clostridioides difficile	38	4	1.19e-05
GUT_GENOME142289|MOTM01000070|10|7	BC-0302413540|k141_158	Kitrinoviricota	GUT_GENOME142330	d__Bacteria;p__Firmicutes_A;c__Clostridia;o__Peptostreptococcales;f__Peptostreptococcaceae;g__Clostridioides;s__Clostridioides difficile	38	4	1.19e-05
GUT_GENOME142289|MOTM01000070|10|7	SRR11450578|k141_2066_flag=1_multi=317.0000_len=8175	Pisuviricota	GUT_GENOME142330	d__Bacteria;p__Firmicutes_A;c__Clostridia;o__Peptostreptococcales;f__Peptostreptococcaceae;g__Clostridioides;s__Clostridioides difficile	38	4	1.19e-05
GUT_GENOME142289|MOTM01000070|10|7	SRR11648176|k141_60865_flag=1_multi=117.8157_len=8095	Pisuviricota	GUT_GENOME142330	d__Bacteria;p__Firmicutes_A;c__Clostridia;o__Peptostreptococcales;f__Peptostreptococcaceae;g__Clostridioides;s__Clostridioides difficile	38	4	1.19e-05
GUT_GENOME142289|MOTM01000070|10|7	SRR11450577|k141_1033_flag=1_multi=59.9742_len=2428	Pisuviricota	GUT_GENOME142330	d__Bacteria;p__Firmicutes_A;c__Clostridia;o__Peptostreptococcales;f__Peptostreptococcaceae;g__Clostridioides;s__Clostridioides difficile	38	4	1.19e-05
GUT_GENOME142289|MOTM01000070|10|7	SRR11648176|k141_2385_flag=1_multi=24.0000_len=8655	Pisuviricota	GUT_GENOME142330	d__Bacteria;p__Firmicutes_A;c__Clostridia;o__Peptostreptococcales;f__Peptostreptococcaceae;g__Clostridioides;s__Clostridioides difficile	27	1	0.000154
GUT_GENOME142289|MOTM01000070|10|7	SRR11648176|k141_2385_flag=1_multi=24.0000_len=8655	Pisuviricota	GUT_GENOME142330	d__Bacteria;p__Firmicutes_A;c__Clostridia;o__Peptostreptococcales;f__Peptostreptococcaceae;g__Clostridioides;s__Clostridioides difficile	27	1	0.000154
GUT_GENOME142289|MOTM01000070|10|7	SRR5829926|k141_223325_flag=1_multi=36.0000_len=9335	Pisuviricota	GUT_GENOME142330	d__Bacteria;p__Firmicutes_A;c__Clostridia;o__Peptostreptococcales;f__Peptostreptococcaceae;g__Clostridioides;s__Clostridioides difficile	38	4	1.19e-05
GUT_GENOME142289|MOTM01000070|10|7	SRR11829101|k141_118032_flag=1_multi=42.0000_len=1898	Pisuviricota	GUT_GENOME142330	d__Bacteria;p__Firmicutes_A;c__Clostridia;o__Peptostreptococcales;f__Peptostreptococcaceae;g__Clostridioides;s__Clostridioides difficile	24	0	0.000154
GUT_GENOME142289|MOTM01000070|10|7	SRR11649087|k141_263042_flag=1_multi=27.0000_len=4125	Kitrinoviricota	GUT_GENOME142330	d__Bacteria;p__Firmicutes_A;c__Clostridia;o__Peptostreptococcales;f__Peptostreptococcaceae;g__Clostridioides;s__Clostridioides difficile	38	4	1.19e-05
GUT_GENOME142289|MOTM01000070|10|7	SRR17481244|k141_434_flag=1_multi=161.0000_len=2746	Kitrinoviricota	GUT_GENOME142330	d__Bacteria;p__Firmicutes_A;c__Clostridia;o__Peptostreptococcales;f__Peptostreptococcaceae;g__Clostridioides;s__Clostridioides difficile	38	4	1.19e-05
GUT_GENOME142289|MOTM01000070|10|7	SRR11829143|k141_119731_flag=1_multi=545.5096_len=9090	Pisuviricota	GUT_GENOME142330	d__Bacteria;p__Firmicutes_A;c__Clostridia;o__Peptostreptococcales;f__Peptostreptococcaceae;g__Clostridioides;s__Clostridioides difficile	38	4	1.19e-05
GUT_GENOME142289|MOTM01000070|10|7	SRR12685203|k141_1072_flag=1_multi=19.0000_len=4241	Kitrinoviricota	GUT_GENOME142330	d__Bacteria;p__Firmicutes_A;c__Clostridia;o__Peptostreptococcales;f__Peptostreptococcaceae;g__Clostridioides;s__Clostridioides difficile	38	4	1.19e-05
GUT_GENOME142289|MOTM01000070|10|7	BC-0302417267|k141_472	Kitrinoviricota	GUT_GENOME142330	d__Bacteria;p__Firmicutes_A;c__Clostridia;o__Peptostreptococcales;f__Peptostreptococcaceae;g__Clostridioides;s__Clostridioides difficile	38	4	1.19e-05
GUT_GENOME142289|MOTM01000070|10|7	SRR10904365|k141_287437_flag=1_multi=32.0000_len=4454	Kitrinoviricota	GUT_GENOME142330	d__Bacteria;p__Firmicutes_A;c__Clostridia;o__Peptostreptococcales;f__Peptostreptococcaceae;g__Clostridioides;s__Clostridioides difficile	38	4	1.19e-05
GUT_GENOME142289|MOTM01000070|10|7	SRR11450580|k141_288389_flag=1_multi=108.0000_len=9065	Pisuviricota	GUT_GENOME142330	d__Bacteria;p__Firmicutes_A;c__Clostridia;o__Peptostreptococcales;f__Peptostreptococcaceae;g__Clostridioides;s__Clostridioides difficile	27	1	0.000154
GUT_GENOME142289|MOTM01000070|10|7	BC-0345724490|k141_9515	Duplornaviricota	GUT_GENOME142330	d__Bacteria;p__Firmicutes_A;c__Clostridia;o__Peptostreptococcales;f__Peptostreptococcaceae;g__Clostridioides;s__Clostridioides difficile	38	4	1.19e-05
GUT_GENOME142289|MOTM01000070|10|7	SRR18771403|k141_110972_flag=1_multi=21.0000_len=1753	Pisuviricota	GUT_GENOME142330	d__Bacteria;p__Firmicutes_A;c__Clostridia;o__Peptostreptococcales;f__Peptostreptococcaceae;g__Clostridioides;s__Clostridioides difficile	32	2	1.19e-05
GUT_GENOME142289|MOTM01000070|10|7	SRR11649087|k141_2929_flag=1_multi=251.0000_len=9689	Pisuviricota	GUT_GENOME142330	d__Bacteria;p__Firmicutes_A;c__Clostridia;o__Peptostreptococcales;f__Peptostreptococcaceae;g__Clostridioides;s__Clostridioides difficile	38	4	1.19e-05
GUT_GENOME142289|MOTM01000070|10|7	SRR11450580|k141_288389_flag=1_multi=108.0000_len=9065	Pisuviricota	GUT_GENOME142330	d__Bacteria;p__Firmicutes_A;c__Clostridia;o__Peptostreptococcales;f__Peptostreptococcaceae;g__Clostridioides;s__Clostridioides difficile	27	1	0.000154
GUT_GENOME142289|MOTM01000070|10|7	SRR11829260|k141_2197_flag=1_multi=57.0000_len=4196	Kitrinoviricota	GUT_GENOME142330	d__Bacteria;p__Firmicutes_A;c__Clostridia;o__Peptostreptococcales;f__Peptostreptococcaceae;g__Clostridioides;s__Clostridioides difficile	38	4	1.19e-05
GUT_GENOME142289|MOTM01000070|10|7	SRR17509979|k141_28799_flag=1_multi=182.0000_len=1917	Pisuviricota	GUT_GENOME142330	d__Bacteria;p__Firmicutes_A;c__Clostridia;o__Peptostreptococcales;f__Peptostreptococcaceae;g__Clostridioides;s__Clostridioides difficile	25	0	4.29e-05
GUT_GENOME142289|MOTM01000070|10|7	SRR11450579|k141_17049_flag=1_multi=4764.0000_len=8934	Pisuviricota	GUT_GENOME142330	d__Bacteria;p__Firmicutes_A;c__Clostridia;o__Peptostreptococcales;f__Peptostreptococcaceae;g__Clostridioides;s__Clostridioides difficile	38	4	1.19e-05
GUT_GENOME142289|MOTM01000070|10|7	SRR11648202|k141_322_flag=0_multi=521.7310_len=1955	Pisuviricota	GUT_GENOME142330	d__Bacteria;p__Firmicutes_A;c__Clostridia;o__Peptostreptococcales;f__Peptostreptococcaceae;g__Clostridioides;s__Clostridioides difficile	38	4	1.19e-05
GUT_GENOME142289|MOTM01000070|10|7	SRR11450586|k141_213458_flag=1_multi=6442.8094_len=10045	Pisuviricota	GUT_GENOME142330	d__Bacteria;p__Firmicutes_A;c__Clostridia;o__Peptostreptococcales;f__Peptostreptococcaceae;g__Clostridioides;s__Clostridioides difficile	38	4	1.19e-05
GUT_GENOME142289|MOTM01000070|10|7	BC-0345698157|k141_28560	Pisuviricota	GUT_GENOME142330	d__Bacteria;p__Firmicutes_A;c__Clostridia;o__Peptostreptococcales;f__Peptostreptococcaceae;g__Clostridioides;s__Clostridioides difficile	38	4	1.19e-05
GUT_GENOME142289|MOTM01000070|10|7	SRR11450579|k141_17049_flag=1_multi=4764.0000_len=8934	Pisuviricota	GUT_GENOME142330	d__Bacteria;p__Firmicutes_A;c__Clostridia;o__Peptostreptococcales;f__Peptostreptococcaceae;g__Clostridioides;s__Clostridioides difficile	38	4	1.19e-05
GUT_GENOME142289|MOTM01000070|10|7	SRR11649087|k141_263042_flag=1_multi=27.0000_len=4125	Kitrinoviricota	GUT_GENOME142330	d__Bacteria;p__Firmicutes_A;c__Clostridia;o__Peptostreptococcales;f__Peptostreptococcaceae;g__Clostridioides;s__Clostridioides difficile	38	4	1.19e-05
GUT_GENOME142289|MOTM01000070|10|7	SRR11450580|k141_288389_flag=1_multi=108.0000_len=9065	Pisuviricota	GUT_GENOME142330	d__Bacteria;p__Firmicutes_A;c__Clostridia;o__Peptostreptococcales;f__Peptostreptococcaceae;g__Clostridioides;s__Clostridioides difficile	27	1	0.000154
GUT_GENOME142289|MOTM01000070|10|7	BC-0345794107|k141_11800	Pisuviricota	GUT_GENOME142330	d__Bacteria;p__Firmicutes_A;c__Clostridia;o__Peptostreptococcales;f__Peptostreptococcaceae;g__Clostridioides;s__Clostridioides difficile	24	0	0.000154
GUT_GENOME142289|MOTM01000070|10|7	SRR11450586|k141_213458_flag=1_multi=6442.8094_len=10045	Pisuviricota	GUT_GENOME142330	d__Bacteria;p__Firmicutes_A;c__Clostridia;o__Peptostreptococcales;f__Peptostreptococcaceae;g__Clostridioides;s__Clostridioides difficile	38	4	1.19e-05
GUT_GENOME142289|MOTM01000070|10|7	BC-0345317873|k141_88724	Pisuviricota	GUT_GENOME142330	d__Bacteria;p__Firmicutes_A;c__Clostridia;o__Peptostreptococcales;f__Peptostreptococcaceae;g__Clostridioides;s__Clostridioides difficile	27	1	0.000154
GUT_GENOME142289|MOTM01000070|10|7	SRR11648202|k141_322_flag=0_multi=521.7310_len=1955	Pisuviricota	GUT_GENOME142330	d__Bacteria;p__Firmicutes_A;c__Clostridia;o__Peptostreptococcales;f__Peptostreptococcaceae;g__Clostridioides;s__Clostridioides difficile	38	4	1.19e-05
GUT_GENOME142289|MOTM01000070|10|7	SRR11450586|k141_213458_flag=1_multi=6442.8094_len=10045	Pisuviricota	GUT_GENOME142330	d__Bacteria;p__Firmicutes_A;c__Clostridia;o__Peptostreptococcales;f__Peptostreptococcaceae;g__Clostridioides;s__Clostridioides difficile	38	4	1.19e-05
GUT_GENOME142289|MOTM01000070|10|7	BC-0345698157|k141_28560	Pisuviricota	GUT_GENOME142330	d__Bacteria;p__Firmicutes_A;c__Clostridia;o__Peptostreptococcales;f__Peptostreptococcaceae;g__Clostridioides;s__Clostridioides difficile	38	4	1.19e-05
GUT_GENOME142289|MOTM01000070|10|7	SRR18770931|k141_10146_flag=1_multi=8296.0000_len=3027	Pisuviricota	GUT_GENOME142330	d__Bacteria;p__Firmicutes_A;c__Clostridia;o__Peptostreptococcales;f__Peptostreptococcaceae;g__Clostridioides;s__Clostridioides difficile	26	1	0.000555
GUT_GENOME142289|MOTM01000070|10|7	SRR18771403|k141_2176_flag=1_multi=18.0000_len=4094	Pisuviricota	GUT_GENOME142330	d__Bacteria;p__Firmicutes_A;c__Clostridia;o__Peptostreptococcales;f__Peptostreptococcaceae;g__Clostridioides;s__Clostridioides difficile	38	4	1.19e-05
GUT_GENOME142289|MOTM01000070|10|7	SRR12685203|k141_1072_flag=1_multi=19.0000_len=4241	Kitrinoviricota	GUT_GENOME142330	d__Bacteria;p__Firmicutes_A;c__Clostridia;o__Peptostreptococcales;f__Peptostreptococcaceae;g__Clostridioides;s__Clostridioides difficile	38	4	1.19e-05
GUT_GENOME142289|MOTM01000070|10|7	SRR11828900|k141_55027_flag=1_multi=15.0000_len=8550	Pisuviricota	GUT_GENOME142330	d__Bacteria;p__Firmicutes_A;c__Clostridia;o__Peptostreptococcales;f__Peptostreptococcaceae;g__Clostridioides;s__Clostridioides difficile	38	4	1.19e-05
GUT_GENOME142289|MOTM01000070|10|7	SRR11829143|k141_119731_flag=1_multi=545.5096_len=9090	Pisuviricota	GUT_GENOME142330	d__Bacteria;p__Firmicutes_A;c__Clostridia;o__Peptostreptococcales;f__Peptostreptococcaceae;g__Clostridioides;s__Clostridioides difficile	38	4	1.19e-05
GUT_GENOME142289|MOTM01000070|10|7	BC-0345317873|k141_88724	Pisuviricota	GUT_GENOME142330	d__Bacteria;p__Firmicutes_A;c__Clostridia;o__Peptostreptococcales;f__Peptostreptococcaceae;g__Clostridioides;s__Clostridioides difficile	27	1	0.000154
GUT_GENOME142289|MOTM01000070|10|7	BC-0345649514|k141_807	Pisuviricota	GUT_GENOME142330	d__Bacteria;p__Firmicutes_A;c__Clostridia;o__Peptostreptococcales;f__Peptostreptococcaceae;g__Clostridioides;s__Clostridioides difficile	38	4	1.19e-05
GUT_GENOME142289|MOTM01000070|10|7	SRR11648360|k141_2427_flag=0_multi=550.5579_len=8547	Pisuviricota	GUT_GENOME142330	d__Bacteria;p__Firmicutes_A;c__Clostridia;o__Peptostreptococcales;f__Peptostreptococcaceae;g__Clostridioides;s__Clostridioides difficile	38	4	1.19e-05
GUT_GENOME142289|MOTM01000070|10|7	SRR11829260|k141_2197_flag=1_multi=57.0000_len=4196	Kitrinoviricota	GUT_GENOME142330	d__Bacteria;p__Firmicutes_A;c__Clostridia;o__Peptostreptococcales;f__Peptostreptococcaceae;g__Clostridioides;s__Clostridioides difficile	38	4	1.19e-05
GUT_GENOME142289|MOTM01000070|10|7	BC-0302417267|k141_472	Kitrinoviricota	GUT_GENOME142330	d__Bacteria;p__Firmicutes_A;c__Clostridia;o__Peptostreptococcales;f__Peptostreptococcaceae;g__Clostridioides;s__Clostridioides difficile	38	4	1.19e-05
GUT_GENOME142289|MOTM01000070|10|7	BC-0332571705|k141_1013	Kitrinoviricota	GUT_GENOME142330	d__Bacteria;p__Firmicutes_A;c__Clostridia;o__Peptostreptococcales;f__Peptostreptococcaceae;g__Clostridioides;s__Clostridioides difficile	38	4	1.19e-05
GUT_GENOME142289|MOTM01000070|10|7	BC-0345724490|k141_9515	Duplornaviricota	GUT_GENOME142330	d__Bacteria;p__Firmicutes_A;c__Clostridia;o__Peptostreptococcales;f__Peptostreptococcaceae;g__Clostridioides;s__Clostridioides difficile	38	4	1.19e-05
GUT_GENOME142289|MOTM01000070|10|7	SRR17481244|k141_434_flag=1_multi=161.0000_len=2746	Kitrinoviricota	GUT_GENOME142330	d__Bacteria;p__Firmicutes_A;c__Clostridia;o__Peptostreptococcales;f__Peptostreptococcaceae;g__Clostridioides;s__Clostridioides difficile	38	4	1.19e-05
GUT_GENOME142289|MOTM01000070|10|7	BC-0345318769|k141_41055	Pisuviricota	GUT_GENOME142330	d__Bacteria;p__Firmicutes_A;c__Clostridia;o__Peptostreptococcales;f__Peptostreptococcaceae;g__Clostridioides;s__Clostridioides difficile	38	4	1.19e-05
GUT_GENOME142289|MOTM01000070|10|7	SRR11450578|k141_2066_flag=1_multi=317.0000_len=8175	Pisuviricota	GUT_GENOME142330	d__Bacteria;p__Firmicutes_A;c__Clostridia;o__Peptostreptococcales;f__Peptostreptococcaceae;g__Clostridioides;s__Clostridioides difficile	38	4	1.19e-05
GUT_GENOME142289|MOTM01000070|10|7	BC-0332571705|k141_1013	Kitrinoviricota	GUT_GENOME142330	d__Bacteria;p__Firmicutes_A;c__Clostridia;o__Peptostreptococcales;f__Peptostreptococcaceae;g__Clostridioides;s__Clostridioides difficile	38	4	1.19e-05
GUT_GENOME142289|MOTM01000070|10|7	SRR11829144|k141_959_flag=1_multi=64.0000_len=7947	Pisuviricota	GUT_GENOME142330	d__Bacteria;p__Firmicutes_A;c__Clostridia;o__Peptostreptococcales;f__Peptostreptococcaceae;g__Clostridioides;s__Clostridioides difficile	27	0	0.000555
GUT_GENOME142289|MOTM01000070|10|7	SRR17481244|k141_434_flag=1_multi=161.0000_len=2746	Kitrinoviricota	GUT_GENOME142330	d__Bacteria;p__Firmicutes_A;c__Clostridia;o__Peptostreptococcales;f__Peptostreptococcaceae;g__Clostridioides;s__Clostridioides difficile	38	4	1.19e-05
GUT_GENOME142289|MOTM01000070|10|7	BC-0345318769|k141_41055	Pisuviricota	GUT_GENOME142330	d__Bacteria;p__Firmicutes_A;c__Clostridia;o__Peptostreptococcales;f__Peptostreptococcaceae;g__Clostridioides;s__Clostridioides difficile	38	4	1.19e-05
GUT_GENOME142289|MOTM01000070|10|7	BC-0345724490|k141_9515	Duplornaviricota	GUT_GENOME142330	d__Bacteria;p__Firmicutes_A;c__Clostridia;o__Peptostreptococcales;f__Peptostreptococcaceae;g__Clostridioides;s__Clostridioides difficile	38	4	1.19e-05
GUT_GENOME142289|MOTM01000070|10|7	SRR11450580|k141_109913_flag=1_multi=102.0000_len=6558	Pisuviricota	GUT_GENOME142330	d__Bacteria;p__Firmicutes_A;c__Clostridia;o__Peptostreptococcales;f__Peptostreptococcaceae;g__Clostridioides;s__Clostridioides difficile	38	4	1.19e-05
GUT_GENOME142289|MOTM01000070|10|7	SRR11450578|k141_2066_flag=1_multi=317.0000_len=8175	Pisuviricota	GUT_GENOME142330	d__Bacteria;p__Firmicutes_A;c__Clostridia;o__Peptostreptococcales;f__Peptostreptococcaceae;g__Clostridioides;s__Clostridioides difficile	38	4	1.19e-05
GUT_GENOME142289|MOTM01000070|10|7	SRR11450579|k141_6472_flag=1_multi=27.0000_len=10411	Kitrinoviricota	GUT_GENOME142330	d__Bacteria;p__Firmicutes_A;c__Clostridia;o__Peptostreptococcales;f__Peptostreptococcaceae;g__Clostridioides;s__Clostridioides difficile	27	0	0.000555
GUT_GENOME142289|MOTM01000070|10|7	SRR11648202|k141_322_flag=0_multi=521.7310_len=1955	Pisuviricota	GUT_GENOME142330	d__Bacteria;p__Firmicutes_A;c__Clostridia;o__Peptostreptococcales;f__Peptostreptococcaceae;g__Clostridioides;s__Clostridioides difficile	38	4	1.19e-05
GUT_GENOME142289|MOTM01000070|10|7	BC-0302413540|k141_158	Kitrinoviricota	GUT_GENOME142330	d__Bacteria;p__Firmicutes_A;c__Clostridia;o__Peptostreptococcales;f__Peptostreptococcaceae;g__Clostridioides;s__Clostridioides difficile	38	4	1.19e-05
GUT_GENOME142289|MOTM01000070|10|7	SRR11563379|k141_984_flag=1_multi=10.0000_len=5356	Pisuviricota	GUT_GENOME142330	d__Bacteria;p__Firmicutes_A;c__Clostridia;o__Peptostreptococcales;f__Peptostreptococcaceae;g__Clostridioides;s__Clostridioides difficile	38	4	1.19e-05
GUT_GENOME142289|MOTM01000070|10|7	SRR18771403|k141_7204_flag=1_multi=24.0000_len=3739	Kitrinoviricota	GUT_GENOME142330	d__Bacteria;p__Firmicutes_A;c__Clostridia;o__Peptostreptococcales;f__Peptostreptococcaceae;g__Clostridioides;s__Clostridioides difficile	27	0	0.000555
GUT_GENOME142289|MOTM01000070|10|7	SRR12685203|k141_1072_flag=1_multi=19.0000_len=4241	Kitrinoviricota	GUT_GENOME142330	d__Bacteria;p__Firmicutes_A;c__Clostridia;o__Peptostreptococcales;f__Peptostreptococcaceae;g__Clostridioides;s__Clostridioides difficile	38	4	1.19e-05
GUT_GENOME142289|MOTM01000070|10|7	SRR11828900|k141_55027_flag=1_multi=15.0000_len=8550	Pisuviricota	GUT_GENOME142330	d__Bacteria;p__Firmicutes_A;c__Clostridia;o__Peptostreptococcales;f__Peptostreptococcaceae;g__Clostridioides;s__Clostridioides difficile	38	4	1.19e-05
GUT_GENOME142297|1496.2276.con.0005|7|7	SRR11828459|k141_18049_flag=1_multi=4.0000_len=1029	Duplornaviricota	GUT_GENOME142330	d__Bacteria;p__Firmicutes_A;c__Clostridia;o__Peptostreptococcales;f__Peptostreptococcaceae;g__Clostridioides;s__Clostridioides difficile	29	1	1.11e-05
GUT_GENOME142299|1496.2278.con.0003|3|7	SRR11829261|k141_152797_flag=1_multi=151.2792_len=2526	Kitrinoviricota	GUT_GENOME142330	d__Bacteria;p__Firmicutes_A;c__Clostridia;o__Peptostreptococcales;f__Peptostreptococcaceae;g__Clostridioides;s__Clostridioides difficile	25	0	4.29e-05
GUT_GENOME142300|1496.2279.con.0007|8|10	SRR11828459|k141_18049_flag=1_multi=4.0000_len=1029	Duplornaviricota	GUT_GENOME142330	d__Bacteria;p__Firmicutes_A;c__Clostridia;o__Peptostreptococcales;f__Peptostreptococcaceae;g__Clostridioides;s__Clostridioides difficile	29	1	1.11e-05
GUT_GENOME142303|1496.2283.con.0159|12|3	SRR11829261|k141_152797_flag=1_multi=151.2792_len=2526	Kitrinoviricota	GUT_GENOME142330	d__Bacteria;p__Firmicutes_A;c__Clostridia;o__Peptostreptococcales;f__Peptostreptococcaceae;g__Clostridioides;s__Clostridioides difficile	25	0	4.29e-05
GUT_GENOME142307|1496.2287.con.0018|12|7	SRR11828459|k141_18049_flag=1_multi=4.0000_len=1029	Duplornaviricota	GUT_GENOME142330	d__Bacteria;p__Firmicutes_A;c__Clostridia;o__Peptostreptococcales;f__Peptostreptococcaceae;g__Clostridioides;s__Clostridioides difficile	29	1	1.11e-05
GUT_GENOME142310|1496.2292.con.0001|1|3	SRR11827439|k141_109350_flag=1_multi=4.0000_len=2497	Duplornaviricota	GUT_GENOME142330	d__Bacteria;p__Firmicutes_A;c__Clostridia;o__Peptostreptococcales;f__Peptostreptococcaceae;g__Clostridioides;s__Clostridioides difficile	26	1	0.000481
GUT_GENOME142311|1496.2293.con.0052|13|8	SRR11828459|k141_18049_flag=1_multi=4.0000_len=1029	Duplornaviricota	GUT_GENOME142330	d__Bacteria;p__Firmicutes_A;c__Clostridia;o__Peptostreptococcales;f__Peptostreptococcaceae;g__Clostridioides;s__Clostridioides difficile	29	1	1.11e-05
GUT_GENOME142314|1496.2300.con.0003|3|7	SRR11829261|k141_152797_flag=1_multi=151.2792_len=2526	Kitrinoviricota	GUT_GENOME142330	d__Bacteria;p__Firmicutes_A;c__Clostridia;o__Peptostreptococcales;f__Peptostreptococcaceae;g__Clostridioides;s__Clostridioides difficile	25	0	4.29e-05
GUT_GENOME142315|1496.2307.con.0008|9|8	SRR11828459|k141_18049_flag=1_multi=4.0000_len=1029	Duplornaviricota	GUT_GENOME142330	d__Bacteria;p__Firmicutes_A;c__Clostridia;o__Peptostreptococcales;f__Peptostreptococcaceae;g__Clostridioides;s__Clostridioides difficile	29	1	1.11e-05
GUT_GENOME142317|1496.2309.con.0006|10|7	SRR11828459|k141_18049_flag=1_multi=4.0000_len=1029	Duplornaviricota	GUT_GENOME142330	d__Bacteria;p__Firmicutes_A;c__Clostridia;o__Peptostreptococcales;f__Peptostreptococcaceae;g__Clostridioides;s__Clostridioides difficile	29	1	1.11e-05
GUT_GENOME142319|1496.2311.con.0024|12|7	SRR11828459|k141_18049_flag=1_multi=4.0000_len=1029	Duplornaviricota	GUT_GENOME142330	d__Bacteria;p__Firmicutes_A;c__Clostridia;o__Peptostreptococcales;f__Peptostreptococcaceae;g__Clostridioides;s__Clostridioides difficile	29	1	1.11e-05
GUT_GENOME142321|1496.2313.con.0007|6|8	SRR11828459|k141_18049_flag=1_multi=4.0000_len=1029	Duplornaviricota	GUT_GENOME142330	d__Bacteria;p__Firmicutes_A;c__Clostridia;o__Peptostreptococcales;f__Peptostreptococcaceae;g__Clostridioides;s__Clostridioides difficile	29	1	1.11e-05
GUT_GENOME142327|1496.2320.con.0010|4|11	SRR11827439|k141_109350_flag=1_multi=4.0000_len=2497	Duplornaviricota	GUT_GENOME142330	d__Bacteria;p__Firmicutes_A;c__Clostridia;o__Peptostreptococcales;f__Peptostreptococcaceae;g__Clostridioides;s__Clostridioides difficile	26	1	0.000481
GUT_GENOME142335|LJCI01000013|8|11	SRR11828806|k141_166307_flag=1_multi=10.0000_len=7065	Negarnaviricota	GUT_GENOME142330	d__Bacteria;p__Firmicutes_A;c__Clostridia;o__Peptostreptococcales;f__Peptostreptococcaceae;g__Clostridioides;s__Clostridioides difficile	31	1	0.000154
GUT_GENOME142338|CP026593|1|7	SRR11829261|k141_152797_flag=1_multi=151.2792_len=2526	Kitrinoviricota	GUT_GENOME142330	d__Bacteria;p__Firmicutes_A;c__Clostridia;o__Peptostreptococcales;f__Peptostreptococcaceae;g__Clostridioides;s__Clostridioides difficile	25	0	4.29e-05
GUT_GENOME142339|CP026594|1|7	SRR11829261|k141_152797_flag=1_multi=151.2792_len=2526	Kitrinoviricota	GUT_GENOME142330	d__Bacteria;p__Firmicutes_A;c__Clostridia;o__Peptostreptococcales;f__Peptostreptococcaceae;g__Clostridioides;s__Clostridioides difficile	25	0	4.29e-05
GUT_GENOME142340|CP026595|1|7	SRR11829261|k141_152797_flag=1_multi=151.2792_len=2526	Kitrinoviricota	GUT_GENOME142330	d__Bacteria;p__Firmicutes_A;c__Clostridia;o__Peptostreptococcales;f__Peptostreptococcaceae;g__Clostridioides;s__Clostridioides difficile	25	0	4.29e-05
GUT_GENOME142341|CP026596|1|7	SRR11829261|k141_152797_flag=1_multi=151.2792_len=2526	Kitrinoviricota	GUT_GENOME142330	d__Bacteria;p__Firmicutes_A;c__Clostridia;o__Peptostreptococcales;f__Peptostreptococcaceae;g__Clostridioides;s__Clostridioides difficile	25	0	4.29e-05
GUT_GENOME142342|CP026597|1|7	SRR11829261|k141_152797_flag=1_multi=151.2792_len=2526	Kitrinoviricota	GUT_GENOME142330	d__Bacteria;p__Firmicutes_A;c__Clostridia;o__Peptostreptococcales;f__Peptostreptococcaceae;g__Clostridioides;s__Clostridioides difficile	25	0	4.29e-05
GUT_GENOME142343|CP026598|1|7	SRR11829261|k141_152797_flag=1_multi=151.2792_len=2526	Kitrinoviricota	GUT_GENOME142330	d__Bacteria;p__Firmicutes_A;c__Clostridia;o__Peptostreptococcales;f__Peptostreptococcaceae;g__Clostridioides;s__Clostridioides difficile	25	0	4.29e-05
GUT_GENOME142345|LJCN01000003|4|8	SRR11829261|k141_152797_flag=1_multi=151.2792_len=2526	Kitrinoviricota	GUT_GENOME142330	d__Bacteria;p__Firmicutes_A;c__Clostridia;o__Peptostreptococcales;f__Peptostreptococcaceae;g__Clostridioides;s__Clostridioides difficile	25	0	4.29e-05
GUT_GENOME142346|LJCM01000005|9|19	SRR11829101|k141_170810_flag=1_multi=15.0000_len=5608	Kitrinoviricota	GUT_GENOME142330	d__Bacteria;p__Firmicutes_A;c__Clostridia;o__Peptostreptococcales;f__Peptostreptococcaceae;g__Clostridioides;s__Clostridioides difficile	30	0	1.11e-05
GUT_GENOME142347|PXZF01000024|10|4	SRR11828459|k141_18049_flag=1_multi=4.0000_len=1029	Duplornaviricota	GUT_GENOME142330	d__Bacteria;p__Firmicutes_A;c__Clostridia;o__Peptostreptococcales;f__Peptostreptococcaceae;g__Clostridioides;s__Clostridioides difficile	29	1	1.11e-05
GUT_GENOME142384|accn|JXBS01000027|13|7	SRR11828459|k141_18049_flag=1_multi=4.0000_len=1029	Duplornaviricota	GUT_GENOME142330	d__Bacteria;p__Firmicutes_A;c__Clostridia;o__Peptostreptococcales;f__Peptostreptococcaceae;g__Clostridioides;s__Clostridioides difficile	29	1	1.11e-05
GUT_GENOME142422|KV784983|10|5	SRR11829261|k141_152797_flag=1_multi=151.2792_len=2526	Kitrinoviricota	GUT_GENOME142330	d__Bacteria;p__Firmicutes_A;c__Clostridia;o__Peptostreptococcales;f__Peptostreptococcaceae;g__Clostridioides;s__Clostridioides difficile	25	0	4.29e-05
GUT_GENOME142424|KV785054|10|7	SRR11829261|k141_152797_flag=1_multi=151.2792_len=2526	Kitrinoviricota	GUT_GENOME142330	d__Bacteria;p__Firmicutes_A;c__Clostridia;o__Peptostreptococcales;f__Peptostreptococcaceae;g__Clostridioides;s__Clostridioides difficile	25	0	4.29e-05
GUT_GENOME142425|KV785226|3|12	SRR11828806|k141_166307_flag=1_multi=10.0000_len=7065	Negarnaviricota	GUT_GENOME142330	d__Bacteria;p__Firmicutes_A;c__Clostridia;o__Peptostreptococcales;f__Peptostreptococcaceae;g__Clostridioides;s__Clostridioides difficile	31	1	0.000154
GUT_GENOME142425|KV785226|4|2	SRR11828806|k141_166307_flag=1_multi=10.0000_len=7065	Negarnaviricota	GUT_GENOME142330	d__Bacteria;p__Firmicutes_A;c__Clostridia;o__Peptostreptococcales;f__Peptostreptococcaceae;g__Clostridioides;s__Clostridioides difficile	31	1	0.000154
GUT_GENOME142427|KV785482|3|1	SRR11829261|k141_152797_flag=1_multi=151.2792_len=2526	Kitrinoviricota	GUT_GENOME142330	d__Bacteria;p__Firmicutes_A;c__Clostridia;o__Peptostreptococcales;f__Peptostreptococcaceae;g__Clostridioides;s__Clostridioides difficile	25	0	4.29e-05
GUT_GENOME142428|KV785574|12|6	SRR11829261|k141_152797_flag=1_multi=151.2792_len=2526	Kitrinoviricota	GUT_GENOME142330	d__Bacteria;p__Firmicutes_A;c__Clostridia;o__Peptostreptococcales;f__Peptostreptococcaceae;g__Clostridioides;s__Clostridioides difficile	25	0	4.29e-05
GUT_GENOME142428|KV785574|13|2	SRR11829261|k141_152797_flag=1_multi=151.2792_len=2526	Kitrinoviricota	GUT_GENOME142330	d__Bacteria;p__Firmicutes_A;c__Clostridia;o__Peptostreptococcales;f__Peptostreptococcaceae;g__Clostridioides;s__Clostridioides difficile	25	0	4.29e-05
GUT_GENOME142429|KV785629|4|7	SRR11829261|k141_152797_flag=1_multi=151.2792_len=2526	Kitrinoviricota	GUT_GENOME142330	d__Bacteria;p__Firmicutes_A;c__Clostridia;o__Peptostreptococcales;f__Peptostreptococcaceae;g__Clostridioides;s__Clostridioides difficile	25	0	4.29e-05
GUT_GENOME142433|KV785946|2|8	SRR11829261|k141_152797_flag=1_multi=151.2792_len=2526	Kitrinoviricota	GUT_GENOME142330	d__Bacteria;p__Firmicutes_A;c__Clostridia;o__Peptostreptococcales;f__Peptostreptococcaceae;g__Clostridioides;s__Clostridioides difficile	25	0	4.29e-05
GUT_GENOME143596|accn|NZ_GG657937|8|9	SRR11829331|k141_80604_flag=1_multi=16.0000_len=5519	Kitrinoviricota	GUT_GENOME096028	d__Bacteria;p__Fusobacteriota;c__Fusobacteriia;o__Fusobacteriales;f__Fusobacteriaceae;g__Fusobacterium;s__Fusobacterium periodonticum_D	30	1	0.000518
GUT_GENOME149245|NODE_20_length_255356_cov_31.5323|1|3	SRR11829144|k141_97467_flag=1_multi=5.0000_len=1605	Pisuviricota	GUT_GENOME000237	d__Bacteria;p__Firmicutes_A;c__Clostridia;o__Lachnospirales;f__Lachnospiraceae;g__Lachnospira;s__Lachnospira eligens_B	26	1	0.000518
GUT_GENOME149265|NODE_3702_length_3572_cov_1.57009|1|3	BC-0332773227|k141_14088	Kitrinoviricota	GUT_GENOME140251	d__Bacteria;p__Firmicutes_C;c__Negativicutes;o__Selenomonadales;f__Selenomonadaceae;g__Megamonas;s__Megamonas funiformis	27	0	0.000481
GUT_GENOME149671|NODE_2_length_233739_cov_8.5158|5|34	SRR12334072|k141_33233_flag=1_multi=12.0000_len=6216	Pisuviricota	GUT_GENOME096033	d__Bacteria;p__Fusobacteriota;c__Fusobacteriia;o__Fusobacteriales;f__Fusobacteriaceae;g__Fusobacterium_A;s__Fusobacterium_A ulcerans	23	0	0.000518
GUT_GENOME150860|NODE_237_length_33894_cov_4.36789|2|5	SRR11829144|k141_97467_flag=1_multi=5.0000_len=1605	Pisuviricota	GUT_GENOME000237	d__Bacteria;p__Firmicutes_A;c__Clostridia;o__Lachnospirales;f__Lachnospiraceae;g__Lachnospira;s__Lachnospira eligens_B	26	1	0.000518
GUT_GENOME150887|NODE_149_length_69803_cov_8.27207|1|1	SRR11564271|k141_243949_flag=1_multi=15.0000_len=3432	Pisuviricota	GUT_GENOME000308	d__Bacteria;p__Firmicutes_A;c__Clostridia;o__Lachnospirales;f__Lachnospiraceae;g__Lachnospira;s__Lachnospira rogosae	23	0	0.000185
GUT_GENOME152584|NODE_5_length_360803_cov_14.7878|1|2	SRR11828805|k141_149648_flag=1_multi=9.0000_len=6783	Unclassified	GUT_GENOME000237	d__Bacteria;p__Firmicutes_A;c__Clostridia;o__Lachnospirales;f__Lachnospiraceae;g__Lachnospira;s__Lachnospira eligens_B	31	1	0.000165
GUT_GENOME153214|NODE_365_length_68045_cov_12.2602|1|7	SRR11828897|k141_116770_flag=1_multi=7.0000_len=3004	Pisuviricota	GUT_GENOME132205	d__Archaea;p__Euryarchaeota;c__Methanobacteria;o__Methanobacteriales;f__Methanobacteriaceae;g__Methanobrevibacter_A;s__Methanobrevibacter_A smithii	23	0	0.000518
GUT_GENOME153822|NODE_643_length_39527_cov_4.31987|5|17	SRR11829144|k141_97467_flag=1_multi=5.0000_len=1605	Pisuviricota	GUT_GENOME000237	d__Bacteria;p__Firmicutes_A;c__Clostridia;o__Lachnospirales;f__Lachnospiraceae;g__Lachnospira;s__Lachnospira eligens_B	26	1	0.000444
GUT_GENOME154305|NODE_110_length_116088_cov_21.9073|1|7	SRR11829144|k141_97467_flag=1_multi=5.0000_len=1605	Pisuviricota	GUT_GENOME000237	d__Bacteria;p__Firmicutes_A;c__Clostridia;o__Lachnospirales;f__Lachnospiraceae;g__Lachnospira;s__Lachnospira eligens_B	26	1	0.000518
GUT_GENOME155565|NODE_1119_length_22509_cov_16.7927|1|7	SRR11828806|k141_193153_flag=1_multi=23.6586_len=9018	Pisuviricota	GUT_GENOME143602	d__Bacteria;p__Fusobacteriota;c__Fusobacteriia;o__Fusobacteriales;f__Fusobacteriaceae;g__Fusobacterium_A;s__Fusobacterium_A mortiferum	26	1	0.00074
GUT_GENOME155761|NODE_164_length_83266_cov_57.0786|1|3	SRR12685203|k141_108116_flag=1_multi=12.0000_len=8501	Pisuviricota	GUT_GENOME002738	d__Bacteria;p__Bacteroidota;c__Bacteroidia;o__Bacteroidales;f__Bacteroidaceae;g__Prevotella;s__Prevotella buccae	22	0	0.001
GUT_GENOME158139|NODE_32_length_300984_cov_15.9078|2|14	SRR18771403|k141_143859_flag=1_multi=26.0000_len=4799	Pisuviricota	GUT_GENOME009178	d__Bacteria;p__Firmicutes_A;c__Clostridia;o__Lachnospirales;f__Lachnospiraceae;g__UBA11774;s__UBA11774 sp003507655	24	0	8.23e-05
GUT_GENOME158728|NODE_126_length_137227_cov_13.8435|1|1	SRR5829904|k141_24749_flag=1_multi=8.0000_len=3809	Kitrinoviricota	GUT_GENOME000295	d__Bacteria;p__Firmicutes_A;c__Clostridia;o__Lachnospirales;f__Lachnospiraceae;g__Roseburia;s__Roseburia intestinalis	32	1	6e-05
GUT_GENOME159858|NODE_1385_length_5686_cov_14.0099|1|12	SRR11565167|k141_124505_flag=1_multi=11.0000_len=1677	Kitrinoviricota	GUT_GENOME143712	d__Bacteria;p__Firmicutes_A;c__Clostridia;o__Lachnospirales;f__Lachnospiraceae;g__Agathobacter;s__Agathobacter rectalis	31	1	5.53e-07
GUT_GENOME159858|NODE_1385_length_5686_cov_14.0099|1|12	SRR17509970|k141_1110097_flag=1_multi=29.0000_len=2075	Pisuviricota	GUT_GENOME143712	d__Bacteria;p__Firmicutes_A;c__Clostridia;o__Lachnospirales;f__Lachnospiraceae;g__Agathobacter;s__Agathobacter rectalis	26	1	0.000333
GUT_GENOME159858|NODE_1385_length_5686_cov_14.0099|1|12	SRR11829332|k141_140645_flag=1_multi=5.0000_len=2837	Pisuviricota	GUT_GENOME143712	d__Bacteria;p__Firmicutes_A;c__Clostridia;o__Lachnospirales;f__Lachnospiraceae;g__Agathobacter;s__Agathobacter rectalis	24	0	9.26e-05
GUT_GENOME159858|NODE_1385_length_5686_cov_14.0099|1|12	SRR11649087|k141_62756_flag=1_multi=5.9805_len=5783	Pisuviricota	GUT_GENOME143712	d__Bacteria;p__Firmicutes_A;c__Clostridia;o__Lachnospirales;f__Lachnospiraceae;g__Agathobacter;s__Agathobacter rectalis	29	1	7.16e-06
GUT_GENOME159858|NODE_1385_length_5686_cov_14.0099|1|12	SRR17509970|k141_1110097_flag=1_multi=29.0000_len=2075	Pisuviricota	GUT_GENOME143712	d__Bacteria;p__Firmicutes_A;c__Clostridia;o__Lachnospirales;f__Lachnospiraceae;g__Agathobacter;s__Agathobacter rectalis	26	1	0.000333
GUT_GENOME159858|NODE_1385_length_5686_cov_14.0099|1|12	SRR11565167|k141_124505_flag=1_multi=11.0000_len=1677	Kitrinoviricota	GUT_GENOME143712	d__Bacteria;p__Firmicutes_A;c__Clostridia;o__Lachnospirales;f__Lachnospiraceae;g__Agathobacter;s__Agathobacter rectalis	31	1	5.53e-07
GUT_GENOME159858|NODE_1385_length_5686_cov_14.0099|1|12	SRR17509970|k141_1110097_flag=1_multi=29.0000_len=2075	Pisuviricota	GUT_GENOME143712	d__Bacteria;p__Firmicutes_A;c__Clostridia;o__Lachnospirales;f__Lachnospiraceae;g__Agathobacter;s__Agathobacter rectalis	26	1	0.000333
GUT_GENOME159858|NODE_1385_length_5686_cov_14.0099|1|12	SRR11649087|k141_62756_flag=1_multi=5.9805_len=5783	Pisuviricota	GUT_GENOME143712	d__Bacteria;p__Firmicutes_A;c__Clostridia;o__Lachnospirales;f__Lachnospiraceae;g__Agathobacter;s__Agathobacter rectalis	29	1	7.16e-06
GUT_GENOME159858|NODE_1385_length_5686_cov_14.0099|1|12	SRR11829332|k141_140645_flag=1_multi=5.0000_len=2837	Pisuviricota	GUT_GENOME143712	d__Bacteria;p__Firmicutes_A;c__Clostridia;o__Lachnospirales;f__Lachnospiraceae;g__Agathobacter;s__Agathobacter rectalis	24	0	9.26e-05
GUT_GENOME159858|NODE_1385_length_5686_cov_14.0099|1|12	SRR11565167|k141_124505_flag=1_multi=11.0000_len=1677	Kitrinoviricota	GUT_GENOME143712	d__Bacteria;p__Firmicutes_A;c__Clostridia;o__Lachnospirales;f__Lachnospiraceae;g__Agathobacter;s__Agathobacter rectalis	31	1	5.53e-07
GUT_GENOME159858|NODE_1385_length_5686_cov_14.0099|1|12	SRR11829332|k141_140645_flag=1_multi=5.0000_len=2837	Pisuviricota	GUT_GENOME143712	d__Bacteria;p__Firmicutes_A;c__Clostridia;o__Lachnospirales;f__Lachnospiraceae;g__Agathobacter;s__Agathobacter rectalis	24	0	9.26e-05
GUT_GENOME159858|NODE_1385_length_5686_cov_14.0099|1|12	SRR11829332|k141_140645_flag=1_multi=5.0000_len=2837	Pisuviricota	GUT_GENOME143712	d__Bacteria;p__Firmicutes_A;c__Clostridia;o__Lachnospirales;f__Lachnospiraceae;g__Agathobacter;s__Agathobacter rectalis	24	0	9.26e-05
GUT_GENOME159858|NODE_1385_length_5686_cov_14.0099|1|12	SRR11829332|k141_140645_flag=1_multi=5.0000_len=2837	Pisuviricota	GUT_GENOME143712	d__Bacteria;p__Firmicutes_A;c__Clostridia;o__Lachnospirales;f__Lachnospiraceae;g__Agathobacter;s__Agathobacter rectalis	24	0	9.26e-05
GUT_GENOME161847|NODE_1655_length_6071_cov_10.2434|1|9	SRR10664368|k141_9989_flag=1_multi=23.0000_len=2581	Kitrinoviricota	GUT_GENOME116282	d__Bacteria;p__Bacteroidota;c__Bacteroidia;o__Bacteroidales;f__Muribaculaceae;g__CAG-873;s__CAG-873 sp001701165	26	1	0.000296
GUT_GENOME161847|NODE_1655_length_6071_cov_10.2434|1|9	SRR7007033|k141_348953_flag=1_multi=22.0000_len=5387	Kitrinoviricota	GUT_GENOME116282	d__Bacteria;p__Bacteroidota;c__Bacteroidia;o__Bacteroidales;f__Muribaculaceae;g__CAG-873;s__CAG-873 sp001701165	23	0	0.000296
GUT_GENOME161847|NODE_1655_length_6071_cov_10.2434|1|9	SRR11829105|k141_175454_flag=1_multi=19.0000_len=5898	Pisuviricota	GUT_GENOME116282	d__Bacteria;p__Bacteroidota;c__Bacteroidia;o__Bacteroidales;f__Muribaculaceae;g__CAG-873;s__CAG-873 sp001701165	23	0	0.000296
GUT_GENOME161847|NODE_1655_length_6071_cov_10.2434|1|9	SRR11829260|k141_143704_flag=1_multi=9.0000_len=2018	Pisuviricota	GUT_GENOME116282	d__Bacteria;p__Bacteroidota;c__Bacteroidia;o__Bacteroidales;f__Muribaculaceae;g__CAG-873;s__CAG-873 sp001701165	23	0	0.000296
GUT_GENOME161847|NODE_1655_length_6071_cov_10.2434|1|9	SRR11829260|k141_135488_flag=1_multi=7.0000_len=2955	Pisuviricota	GUT_GENOME116282	d__Bacteria;p__Bacteroidota;c__Bacteroidia;o__Bacteroidales;f__Muribaculaceae;g__CAG-873;s__CAG-873 sp001701165	23	0	0.000296
GUT_GENOME161847|NODE_1655_length_6071_cov_10.2434|1|9	SRR10664368|k141_9989_flag=1_multi=23.0000_len=2581	Kitrinoviricota	GUT_GENOME116282	d__Bacteria;p__Bacteroidota;c__Bacteroidia;o__Bacteroidales;f__Muribaculaceae;g__CAG-873;s__CAG-873 sp001701165	26	1	0.000296
GUT_GENOME161847|NODE_1655_length_6071_cov_10.2434|1|9	SRR11829260|k141_204104_flag=1_multi=13.0000_len=2781	Pisuviricota	GUT_GENOME116282	d__Bacteria;p__Bacteroidota;c__Bacteroidia;o__Bacteroidales;f__Muribaculaceae;g__CAG-873;s__CAG-873 sp001701165	26	1	0.000296
GUT_GENOME161847|NODE_1655_length_6071_cov_10.2434|1|9	SRR11829260|k141_13098_flag=1_multi=24.0000_len=3109	Pisuviricota	GUT_GENOME116282	d__Bacteria;p__Bacteroidota;c__Bacteroidia;o__Bacteroidales;f__Muribaculaceae;g__CAG-873;s__CAG-873 sp001701165	27	1	8.23e-05
GUT_GENOME161847|NODE_1655_length_6071_cov_10.2434|1|9	SRR11829260|k141_13098_flag=1_multi=24.0000_len=3109	Pisuviricota	GUT_GENOME116282	d__Bacteria;p__Bacteroidota;c__Bacteroidia;o__Bacteroidales;f__Muribaculaceae;g__CAG-873;s__CAG-873 sp001701165	27	1	8.23e-05
GUT_GENOME162776|NODE_1649_length_7628_cov_29.3588|1|6	SRR11622633|k141_86492_flag=1_multi=28.0000_len=9197	Pisuviricota	GUT_GENOME143712	d__Bacteria;p__Firmicutes_A;c__Clostridia;o__Lachnospirales;f__Lachnospiraceae;g__Agathobacter;s__Agathobacter rectalis	23	0	0.000407
GUT_GENOME162813|NODE_25_length_96942_cov_21.8983|4|17	BC-0345723647|k141_21378	Negarnaviricota	GUT_GENOME253356	d__Bacteria;p__Bacteroidota;c__Bacteroidia;o__Bacteroidales;f__Rikenellaceae;g__Alistipes;s__Alistipes sp000434235	30	1	0.000296
GUT_GENOME164416|NODE_360_length_32113_cov_18.346497|1|78	SRR11450579|k141_41805_flag=1_multi=13.0000_len=3707	Kitrinoviricota	GUT_GENOME132205	d__Archaea;p__Euryarchaeota;c__Methanobacteria;o__Methanobacteriales;f__Methanobacteriaceae;g__Methanobrevibacter_A;s__Methanobrevibacter_A smithii	26	1	0.000481
GUT_GENOME168310|NODE_396_length_6878_cov_3.57541|1|2	SRR11829261|k141_127994_flag=1_multi=9.0000_len=2328	Pisuviricota	GUT_GENOME141068	d__Bacteria;p__Firmicutes_A;c__Clostridia;o__Lachnospirales;f__Lachnospiraceae;g__Eisenbergiella;s__Eisenbergiella tayi	26	1	0.000518
GUT_GENOME170660|NODE_42_length_87212_cov_19.426655|1|8	SRR11648202|k141_322_flag=0_multi=521.7310_len=1955	Pisuviricota	GUT_GENOME011995	d__Bacteria;p__Spirochaetota;c__Spirochaetia;o__Treponematales;f__Treponemataceae;g__Treponema_D;s__	24	0	3.09e-05
GUT_GENOME170660|NODE_42_length_87212_cov_19.426655|1|8	BC-0345649514|k141_807	Pisuviricota	GUT_GENOME011995	d__Bacteria;p__Spirochaetota;c__Spirochaetia;o__Treponematales;f__Treponemataceae;g__Treponema_D;s__	24	0	3.09e-05
GUT_GENOME170660|NODE_42_length_87212_cov_19.426655|1|8	SRR11450580|k141_109913_flag=1_multi=102.0000_len=6558	Pisuviricota	GUT_GENOME011995	d__Bacteria;p__Spirochaetota;c__Spirochaetia;o__Treponematales;f__Treponemataceae;g__Treponema_D;s__	24	0	3.09e-05
GUT_GENOME170660|NODE_42_length_87212_cov_19.426655|1|8	SRR11450579|k141_17049_flag=1_multi=4764.0000_len=8934	Pisuviricota	GUT_GENOME011995	d__Bacteria;p__Spirochaetota;c__Spirochaetia;o__Treponematales;f__Treponemataceae;g__Treponema_D;s__	24	0	3.09e-05
GUT_GENOME170660|NODE_42_length_87212_cov_19.426655|1|8	SRR11450579|k141_76622_flag=1_multi=211.0000_len=8995	Pisuviricota	GUT_GENOME011995	d__Bacteria;p__Spirochaetota;c__Spirochaetia;o__Treponematales;f__Treponemataceae;g__Treponema_D;s__	24	0	3.09e-05
GUT_GENOME170660|NODE_42_length_87212_cov_19.426655|1|8	SRR11450577|k141_1033_flag=1_multi=59.9742_len=2428	Pisuviricota	GUT_GENOME011995	d__Bacteria;p__Spirochaetota;c__Spirochaetia;o__Treponematales;f__Treponemataceae;g__Treponema_D;s__	24	0	3.09e-05
GUT_GENOME170660|NODE_42_length_87212_cov_19.426655|1|8	SRR11450579|k141_76622_flag=1_multi=211.0000_len=8995	Pisuviricota	GUT_GENOME011995	d__Bacteria;p__Spirochaetota;c__Spirochaetia;o__Treponematales;f__Treponemataceae;g__Treponema_D;s__	24	0	3.09e-05
GUT_GENOME170660|NODE_42_length_87212_cov_19.426655|1|8	BC-0345649514|k141_807	Pisuviricota	GUT_GENOME011995	d__Bacteria;p__Spirochaetota;c__Spirochaetia;o__Treponematales;f__Treponemataceae;g__Treponema_D;s__	24	0	3.09e-05
GUT_GENOME170660|NODE_42_length_87212_cov_19.426655|1|8	BC-0345649514|k141_807	Pisuviricota	GUT_GENOME011995	d__Bacteria;p__Spirochaetota;c__Spirochaetia;o__Treponematales;f__Treponemataceae;g__Treponema_D;s__	24	0	3.09e-05
GUT_GENOME170660|NODE_42_length_87212_cov_19.426655|1|8	SRR11450586|k141_213458_flag=1_multi=6442.8094_len=10045	Pisuviricota	GUT_GENOME011995	d__Bacteria;p__Spirochaetota;c__Spirochaetia;o__Treponematales;f__Treponemataceae;g__Treponema_D;s__	24	0	3.09e-05
GUT_GENOME170660|NODE_42_length_87212_cov_19.426655|1|8	BC-0345318742|k141_63184	Pisuviricota	GUT_GENOME011995	d__Bacteria;p__Spirochaetota;c__Spirochaetia;o__Treponematales;f__Treponemataceae;g__Treponema_D;s__	24	0	3.09e-05
GUT_GENOME170660|NODE_42_length_87212_cov_19.426655|1|8	SRR11648202|k141_322_flag=0_multi=521.7310_len=1955	Pisuviricota	GUT_GENOME011995	d__Bacteria;p__Spirochaetota;c__Spirochaetia;o__Treponematales;f__Treponemataceae;g__Treponema_D;s__	24	0	3.09e-05
GUT_GENOME170660|NODE_42_length_87212_cov_19.426655|1|8	SRR11450579|k141_236588_flag=1_multi=105.0000_len=8198	Pisuviricota	GUT_GENOME011995	d__Bacteria;p__Spirochaetota;c__Spirochaetia;o__Treponematales;f__Treponemataceae;g__Treponema_D;s__	24	0	3.09e-05
GUT_GENOME170660|NODE_42_length_87212_cov_19.426655|1|8	SRR11450580|k141_1194_flag=1_multi=129.0000_len=9098	Pisuviricota	GUT_GENOME011995	d__Bacteria;p__Spirochaetota;c__Spirochaetia;o__Treponematales;f__Treponemataceae;g__Treponema_D;s__	24	0	3.09e-05
GUT_GENOME170660|NODE_42_length_87212_cov_19.426655|1|8	SRR11649087|k141_2929_flag=1_multi=251.0000_len=9689	Pisuviricota	GUT_GENOME011995	d__Bacteria;p__Spirochaetota;c__Spirochaetia;o__Treponematales;f__Treponemataceae;g__Treponema_D;s__	24	0	3.09e-05
GUT_GENOME170660|NODE_42_length_87212_cov_19.426655|1|8	SRR5829926|k141_223325_flag=1_multi=36.0000_len=9335	Pisuviricota	GUT_GENOME011995	d__Bacteria;p__Spirochaetota;c__Spirochaetia;o__Treponematales;f__Treponemataceae;g__Treponema_D;s__	24	0	3.09e-05
GUT_GENOME170660|NODE_42_length_87212_cov_19.426655|1|8	SRR11648176|k141_60865_flag=1_multi=117.8157_len=8095	Pisuviricota	GUT_GENOME011995	d__Bacteria;p__Spirochaetota;c__Spirochaetia;o__Treponematales;f__Treponemataceae;g__Treponema_D;s__	24	0	3.09e-05
GUT_GENOME170660|NODE_42_length_87212_cov_19.426655|1|8	SRR11450580|k141_1194_flag=1_multi=129.0000_len=9098	Pisuviricota	GUT_GENOME011995	d__Bacteria;p__Spirochaetota;c__Spirochaetia;o__Treponematales;f__Treponemataceae;g__Treponema_D;s__	24	0	3.09e-05
GUT_GENOME170660|NODE_42_length_87212_cov_19.426655|1|8	SRR11450586|k141_213458_flag=1_multi=6442.8094_len=10045	Pisuviricota	GUT_GENOME011995	d__Bacteria;p__Spirochaetota;c__Spirochaetia;o__Treponematales;f__Treponemataceae;g__Treponema_D;s__	24	0	3.09e-05
GUT_GENOME170660|NODE_42_length_87212_cov_19.426655|1|8	SRR11563379|k141_984_flag=1_multi=10.0000_len=5356	Pisuviricota	GUT_GENOME011995	d__Bacteria;p__Spirochaetota;c__Spirochaetia;o__Treponematales;f__Treponemataceae;g__Treponema_D;s__	24	0	3.09e-05
GUT_GENOME170660|NODE_42_length_87212_cov_19.426655|1|8	SRR11450586|k141_213458_flag=1_multi=6442.8094_len=10045	Pisuviricota	GUT_GENOME011995	d__Bacteria;p__Spirochaetota;c__Spirochaetia;o__Treponematales;f__Treponemataceae;g__Treponema_D;s__	24	0	3.09e-05
GUT_GENOME170660|NODE_42_length_87212_cov_19.426655|1|8	SRR11450579|k141_17049_flag=1_multi=4764.0000_len=8934	Pisuviricota	GUT_GENOME011995	d__Bacteria;p__Spirochaetota;c__Spirochaetia;o__Treponematales;f__Treponemataceae;g__Treponema_D;s__	24	0	3.09e-05
GUT_GENOME170660|NODE_42_length_87212_cov_19.426655|1|8	SRR17481244|k141_434_flag=1_multi=161.0000_len=2746	Kitrinoviricota	GUT_GENOME011995	d__Bacteria;p__Spirochaetota;c__Spirochaetia;o__Treponematales;f__Treponemataceae;g__Treponema_D;s__	24	0	3.09e-05
GUT_GENOME170660|NODE_42_length_87212_cov_19.426655|1|8	SRR11450579|k141_236588_flag=1_multi=105.0000_len=8198	Pisuviricota	GUT_GENOME011995	d__Bacteria;p__Spirochaetota;c__Spirochaetia;o__Treponematales;f__Treponemataceae;g__Treponema_D;s__	24	0	3.09e-05
GUT_GENOME170660|NODE_42_length_87212_cov_19.426655|1|8	SRR11450577|k141_193754_flag=1_multi=84.0000_len=8351	Pisuviricota	GUT_GENOME011995	d__Bacteria;p__Spirochaetota;c__Spirochaetia;o__Treponematales;f__Treponemataceae;g__Treponema_D;s__	23	0	0.000111
GUT_GENOME170660|NODE_42_length_87212_cov_19.426655|1|8	SRR11450579|k141_3421_flag=1_multi=110.0000_len=8612	Pisuviricota	GUT_GENOME011995	d__Bacteria;p__Spirochaetota;c__Spirochaetia;o__Treponematales;f__Treponemataceae;g__Treponema_D;s__	24	0	3.09e-05
GUT_GENOME170660|NODE_42_length_87212_cov_19.426655|1|8	SRR11450579|k141_3421_flag=1_multi=110.0000_len=8612	Pisuviricota	GUT_GENOME011995	d__Bacteria;p__Spirochaetota;c__Spirochaetia;o__Treponematales;f__Treponemataceae;g__Treponema_D;s__	24	0	3.09e-05
GUT_GENOME170660|NODE_42_length_87212_cov_19.426655|1|8	SRR11648176|k141_60865_flag=1_multi=117.8157_len=8095	Pisuviricota	GUT_GENOME011995	d__Bacteria;p__Spirochaetota;c__Spirochaetia;o__Treponematales;f__Treponemataceae;g__Treponema_D;s__	24	0	3.09e-05
GUT_GENOME170660|NODE_42_length_87212_cov_19.426655|1|8	BC-0345318769|k141_41055	Pisuviricota	GUT_GENOME011995	d__Bacteria;p__Spirochaetota;c__Spirochaetia;o__Treponematales;f__Treponemataceae;g__Treponema_D;s__	24	0	3.09e-05
GUT_GENOME170660|NODE_42_length_87212_cov_19.426655|1|8	BC-0345318742|k141_63184	Pisuviricota	GUT_GENOME011995	d__Bacteria;p__Spirochaetota;c__Spirochaetia;o__Treponematales;f__Treponemataceae;g__Treponema_D;s__	24	0	3.09e-05
GUT_GENOME170660|NODE_42_length_87212_cov_19.426655|1|8	SRR11450577|k141_1033_flag=1_multi=59.9742_len=2428	Pisuviricota	GUT_GENOME011995	d__Bacteria;p__Spirochaetota;c__Spirochaetia;o__Treponematales;f__Treponemataceae;g__Treponema_D;s__	24	0	3.09e-05
GUT_GENOME170660|NODE_42_length_87212_cov_19.426655|1|8	BC-0345318769|k141_41055	Pisuviricota	GUT_GENOME011995	d__Bacteria;p__Spirochaetota;c__Spirochaetia;o__Treponematales;f__Treponemataceae;g__Treponema_D;s__	24	0	3.09e-05
GUT_GENOME170660|NODE_42_length_87212_cov_19.426655|1|8	SRR17481244|k141_434_flag=1_multi=161.0000_len=2746	Kitrinoviricota	GUT_GENOME011995	d__Bacteria;p__Spirochaetota;c__Spirochaetia;o__Treponematales;f__Treponemataceae;g__Treponema_D;s__	24	0	3.09e-05
GUT_GENOME170660|NODE_42_length_87212_cov_19.426655|1|8	SRR11450577|k141_1033_flag=1_multi=59.9742_len=2428	Pisuviricota	GUT_GENOME011995	d__Bacteria;p__Spirochaetota;c__Spirochaetia;o__Treponematales;f__Treponemataceae;g__Treponema_D;s__	24	0	3.09e-05
GUT_GENOME170660|NODE_42_length_87212_cov_19.426655|1|8	SRR11450579|k141_3421_flag=1_multi=110.0000_len=8612	Pisuviricota	GUT_GENOME011995	d__Bacteria;p__Spirochaetota;c__Spirochaetia;o__Treponematales;f__Treponemataceae;g__Treponema_D;s__	24	0	3.09e-05
GUT_GENOME170660|NODE_42_length_87212_cov_19.426655|1|8	BC-0302417267|k141_472	Kitrinoviricota	GUT_GENOME011995	d__Bacteria;p__Spirochaetota;c__Spirochaetia;o__Treponematales;f__Treponemataceae;g__Treponema_D;s__	24	0	3.09e-05
GUT_GENOME170660|NODE_42_length_87212_cov_19.426655|1|8	BC-0345318742|k141_63184	Pisuviricota	GUT_GENOME011995	d__Bacteria;p__Spirochaetota;c__Spirochaetia;o__Treponematales;f__Treponemataceae;g__Treponema_D;s__	24	0	3.09e-05
GUT_GENOME170660|NODE_42_length_87212_cov_19.426655|1|8	SRR11450577|k141_1033_flag=1_multi=59.9742_len=2428	Pisuviricota	GUT_GENOME011995	d__Bacteria;p__Spirochaetota;c__Spirochaetia;o__Treponematales;f__Treponemataceae;g__Treponema_D;s__	24	0	3.09e-05
GUT_GENOME170660|NODE_42_length_87212_cov_19.426655|1|8	SRR11648176|k141_60865_flag=1_multi=117.8157_len=8095	Pisuviricota	GUT_GENOME011995	d__Bacteria;p__Spirochaetota;c__Spirochaetia;o__Treponematales;f__Treponemataceae;g__Treponema_D;s__	24	0	3.09e-05
GUT_GENOME170660|NODE_42_length_87212_cov_19.426655|1|8	BC-0345649514|k141_807	Pisuviricota	GUT_GENOME011995	d__Bacteria;p__Spirochaetota;c__Spirochaetia;o__Treponematales;f__Treponemataceae;g__Treponema_D;s__	24	0	3.09e-05
GUT_GENOME170660|NODE_42_length_87212_cov_19.426655|1|8	SRR11450578|k141_2066_flag=1_multi=317.0000_len=8175	Pisuviricota	GUT_GENOME011995	d__Bacteria;p__Spirochaetota;c__Spirochaetia;o__Treponematales;f__Treponemataceae;g__Treponema_D;s__	24	0	3.09e-05
GUT_GENOME170660|NODE_42_length_87212_cov_19.426655|1|8	SRR11649087|k141_263042_flag=1_multi=27.0000_len=4125	Kitrinoviricota	GUT_GENOME011995	d__Bacteria;p__Spirochaetota;c__Spirochaetia;o__Treponematales;f__Treponemataceae;g__Treponema_D;s__	24	0	3.09e-05
GUT_GENOME170660|NODE_42_length_87212_cov_19.426655|1|8	SRR11450579|k141_236588_flag=1_multi=105.0000_len=8198	Pisuviricota	GUT_GENOME011995	d__Bacteria;p__Spirochaetota;c__Spirochaetia;o__Treponematales;f__Treponemataceae;g__Treponema_D;s__	24	0	3.09e-05
GUT_GENOME170660|NODE_42_length_87212_cov_19.426655|1|8	SRR11648202|k141_322_flag=0_multi=521.7310_len=1955	Pisuviricota	GUT_GENOME011995	d__Bacteria;p__Spirochaetota;c__Spirochaetia;o__Treponematales;f__Treponemataceae;g__Treponema_D;s__	24	0	3.09e-05
GUT_GENOME170660|NODE_42_length_87212_cov_19.426655|1|8	SRR11450577|k141_1033_flag=1_multi=59.9742_len=2428	Pisuviricota	GUT_GENOME011995	d__Bacteria;p__Spirochaetota;c__Spirochaetia;o__Treponematales;f__Treponemataceae;g__Treponema_D;s__	24	0	3.09e-05
GUT_GENOME170660|NODE_42_length_87212_cov_19.426655|1|8	BC-0345318769|k141_41055	Pisuviricota	GUT_GENOME011995	d__Bacteria;p__Spirochaetota;c__Spirochaetia;o__Treponematales;f__Treponemataceae;g__Treponema_D;s__	24	0	3.09e-05
GUT_GENOME170660|NODE_42_length_87212_cov_19.426655|1|8	SRR11450579|k141_236588_flag=1_multi=105.0000_len=8198	Pisuviricota	GUT_GENOME011995	d__Bacteria;p__Spirochaetota;c__Spirochaetia;o__Treponematales;f__Treponemataceae;g__Treponema_D;s__	24	0	3.09e-05
GUT_GENOME170660|NODE_42_length_87212_cov_19.426655|1|8	SRR11450579|k141_236588_flag=1_multi=105.0000_len=8198	Pisuviricota	GUT_GENOME011995	d__Bacteria;p__Spirochaetota;c__Spirochaetia;o__Treponematales;f__Treponemataceae;g__Treponema_D;s__	24	0	3.09e-05
GUT_GENOME170660|NODE_42_length_87212_cov_19.426655|1|8	SRR11450577|k141_1033_flag=1_multi=59.9742_len=2428	Pisuviricota	GUT_GENOME011995	d__Bacteria;p__Spirochaetota;c__Spirochaetia;o__Treponematales;f__Treponemataceae;g__Treponema_D;s__	24	0	3.09e-05
GUT_GENOME170660|NODE_42_length_87212_cov_19.426655|1|8	SRR11450579|k141_76622_flag=1_multi=211.0000_len=8995	Pisuviricota	GUT_GENOME011995	d__Bacteria;p__Spirochaetota;c__Spirochaetia;o__Treponematales;f__Treponemataceae;g__Treponema_D;s__	24	0	3.09e-05
GUT_GENOME170660|NODE_42_length_87212_cov_19.426655|1|8	SRR11648360|k141_2427_flag=0_multi=550.5579_len=8547	Pisuviricota	GUT_GENOME011995	d__Bacteria;p__Spirochaetota;c__Spirochaetia;o__Treponematales;f__Treponemataceae;g__Treponema_D;s__	24	0	3.09e-05
GUT_GENOME170660|NODE_42_length_87212_cov_19.426655|1|8	SRR11648176|k141_60865_flag=1_multi=117.8157_len=8095	Pisuviricota	GUT_GENOME011995	d__Bacteria;p__Spirochaetota;c__Spirochaetia;o__Treponematales;f__Treponemataceae;g__Treponema_D;s__	24	0	3.09e-05
GUT_GENOME170660|NODE_42_length_87212_cov_19.426655|1|8	SRR11450579|k141_17049_flag=1_multi=4764.0000_len=8934	Pisuviricota	GUT_GENOME011995	d__Bacteria;p__Spirochaetota;c__Spirochaetia;o__Treponematales;f__Treponemataceae;g__Treponema_D;s__	24	0	3.09e-05
GUT_GENOME170660|NODE_42_length_87212_cov_19.426655|1|8	SRR11649087|k141_263042_flag=1_multi=27.0000_len=4125	Kitrinoviricota	GUT_GENOME011995	d__Bacteria;p__Spirochaetota;c__Spirochaetia;o__Treponematales;f__Treponemataceae;g__Treponema_D;s__	24	0	3.09e-05
GUT_GENOME170660|NODE_42_length_87212_cov_19.426655|1|8	SRR11829260|k141_2197_flag=1_multi=57.0000_len=4196	Kitrinoviricota	GUT_GENOME011995	d__Bacteria;p__Spirochaetota;c__Spirochaetia;o__Treponematales;f__Treponemataceae;g__Treponema_D;s__	24	0	3.09e-05
GUT_GENOME170660|NODE_42_length_87212_cov_19.426655|1|8	BC-0345649514|k141_807	Pisuviricota	GUT_GENOME011995	d__Bacteria;p__Spirochaetota;c__Spirochaetia;o__Treponematales;f__Treponemataceae;g__Treponema_D;s__	24	0	3.09e-05
GUT_GENOME170660|NODE_42_length_87212_cov_19.426655|1|8	BC-0345732070|k141_514	Pisuviricota	GUT_GENOME011995	d__Bacteria;p__Spirochaetota;c__Spirochaetia;o__Treponematales;f__Treponemataceae;g__Treponema_D;s__	24	0	3.09e-05
GUT_GENOME170660|NODE_42_length_87212_cov_19.426655|1|8	BC-0345318742|k141_63184	Pisuviricota	GUT_GENOME011995	d__Bacteria;p__Spirochaetota;c__Spirochaetia;o__Treponematales;f__Treponemataceae;g__Treponema_D;s__	24	0	3.09e-05
GUT_GENOME170660|NODE_42_length_87212_cov_19.426655|1|8	BC-0345732070|k141_514	Pisuviricota	GUT_GENOME011995	d__Bacteria;p__Spirochaetota;c__Spirochaetia;o__Treponematales;f__Treponemataceae;g__Treponema_D;s__	24	0	3.09e-05
GUT_GENOME170660|NODE_42_length_87212_cov_19.426655|1|8	SRR11450579|k141_3421_flag=1_multi=110.0000_len=8612	Pisuviricota	GUT_GENOME011995	d__Bacteria;p__Spirochaetota;c__Spirochaetia;o__Treponematales;f__Treponemataceae;g__Treponema_D;s__	24	0	3.09e-05
GUT_GENOME170660|NODE_42_length_87212_cov_19.426655|1|8	SRR11450586|k141_213458_flag=1_multi=6442.8094_len=10045	Pisuviricota	GUT_GENOME011995	d__Bacteria;p__Spirochaetota;c__Spirochaetia;o__Treponematales;f__Treponemataceae;g__Treponema_D;s__	24	0	3.09e-05
GUT_GENOME170660|NODE_42_length_87212_cov_19.426655|1|8	BC-0345318769|k141_41055	Pisuviricota	GUT_GENOME011995	d__Bacteria;p__Spirochaetota;c__Spirochaetia;o__Treponematales;f__Treponemataceae;g__Treponema_D;s__	24	0	3.09e-05
GUT_GENOME170660|NODE_42_length_87212_cov_19.426655|1|8	BC-0345724490|k141_9515	Duplornaviricota	GUT_GENOME011995	d__Bacteria;p__Spirochaetota;c__Spirochaetia;o__Treponematales;f__Treponemataceae;g__Treponema_D;s__	24	0	3.09e-05
GUT_GENOME170660|NODE_42_length_87212_cov_19.426655|1|8	BC-0345649514|k141_807	Pisuviricota	GUT_GENOME011995	d__Bacteria;p__Spirochaetota;c__Spirochaetia;o__Treponematales;f__Treponemataceae;g__Treponema_D;s__	24	0	3.09e-05
GUT_GENOME170660|NODE_42_length_87212_cov_19.426655|1|8	BC-0345318769|k141_41055	Pisuviricota	GUT_GENOME011995	d__Bacteria;p__Spirochaetota;c__Spirochaetia;o__Treponematales;f__Treponemataceae;g__Treponema_D;s__	24	0	3.09e-05
GUT_GENOME170660|NODE_42_length_87212_cov_19.426655|1|8	SRR11450579|k141_3421_flag=1_multi=110.0000_len=8612	Pisuviricota	GUT_GENOME011995	d__Bacteria;p__Spirochaetota;c__Spirochaetia;o__Treponematales;f__Treponemataceae;g__Treponema_D;s__	24	0	3.09e-05
GUT_GENOME170660|NODE_42_length_87212_cov_19.426655|1|8	SRR11450579|k141_17049_flag=1_multi=4764.0000_len=8934	Pisuviricota	GUT_GENOME011995	d__Bacteria;p__Spirochaetota;c__Spirochaetia;o__Treponematales;f__Treponemataceae;g__Treponema_D;s__	24	0	3.09e-05
GUT_GENOME170660|NODE_42_length_87212_cov_19.426655|1|8	SRR11450580|k141_109913_flag=1_multi=102.0000_len=6558	Pisuviricota	GUT_GENOME011995	d__Bacteria;p__Spirochaetota;c__Spirochaetia;o__Treponematales;f__Treponemataceae;g__Treponema_D;s__	24	0	3.09e-05
GUT_GENOME170660|NODE_42_length_87212_cov_19.426655|1|8	SRR11648360|k141_2427_flag=0_multi=550.5579_len=8547	Pisuviricota	GUT_GENOME011995	d__Bacteria;p__Spirochaetota;c__Spirochaetia;o__Treponematales;f__Treponemataceae;g__Treponema_D;s__	24	0	3.09e-05
GUT_GENOME170660|NODE_42_length_87212_cov_19.426655|1|8	BC-0345649514|k141_807	Pisuviricota	GUT_GENOME011995	d__Bacteria;p__Spirochaetota;c__Spirochaetia;o__Treponematales;f__Treponemataceae;g__Treponema_D;s__	24	0	3.09e-05
GUT_GENOME170660|NODE_42_length_87212_cov_19.426655|1|8	BC-0345318769|k141_41055	Pisuviricota	GUT_GENOME011995	d__Bacteria;p__Spirochaetota;c__Spirochaetia;o__Treponematales;f__Treponemataceae;g__Treponema_D;s__	24	0	3.09e-05
GUT_GENOME170660|NODE_42_length_87212_cov_19.426655|1|8	SRR11450586|k141_213458_flag=1_multi=6442.8094_len=10045	Pisuviricota	GUT_GENOME011995	d__Bacteria;p__Spirochaetota;c__Spirochaetia;o__Treponematales;f__Treponemataceae;g__Treponema_D;s__	24	0	3.09e-05
GUT_GENOME170660|NODE_42_length_87212_cov_19.426655|1|8	BC-0345318769|k141_41055	Pisuviricota	GUT_GENOME011995	d__Bacteria;p__Spirochaetota;c__Spirochaetia;o__Treponematales;f__Treponemataceae;g__Treponema_D;s__	24	0	3.09e-05
GUT_GENOME170660|NODE_42_length_87212_cov_19.426655|1|8	SRR11450580|k141_1194_flag=1_multi=129.0000_len=9098	Pisuviricota	GUT_GENOME011995	d__Bacteria;p__Spirochaetota;c__Spirochaetia;o__Treponematales;f__Treponemataceae;g__Treponema_D;s__	24	0	3.09e-05
GUT_GENOME170660|NODE_42_length_87212_cov_19.426655|1|8	SRR11450579|k141_17049_flag=1_multi=4764.0000_len=8934	Pisuviricota	GUT_GENOME011995	d__Bacteria;p__Spirochaetota;c__Spirochaetia;o__Treponematales;f__Treponemataceae;g__Treponema_D;s__	24	0	3.09e-05
GUT_GENOME170660|NODE_42_length_87212_cov_19.426655|1|8	SRR11450580|k141_1194_flag=1_multi=129.0000_len=9098	Pisuviricota	GUT_GENOME011995	d__Bacteria;p__Spirochaetota;c__Spirochaetia;o__Treponematales;f__Treponemataceae;g__Treponema_D;s__	24	0	3.09e-05
GUT_GENOME170660|NODE_42_length_87212_cov_19.426655|1|8	SRR11450579|k141_17049_flag=1_multi=4764.0000_len=8934	Pisuviricota	GUT_GENOME011995	d__Bacteria;p__Spirochaetota;c__Spirochaetia;o__Treponematales;f__Treponemataceae;g__Treponema_D;s__	24	0	3.09e-05
GUT_GENOME170660|NODE_42_length_87212_cov_19.426655|1|8	BC-0345794107|k141_11800	Pisuviricota	GUT_GENOME011995	d__Bacteria;p__Spirochaetota;c__Spirochaetia;o__Treponematales;f__Treponemataceae;g__Treponema_D;s__	22	0	0.000399
GUT_GENOME170660|NODE_42_length_87212_cov_19.426655|1|8	SRR11450580|k141_109913_flag=1_multi=102.0000_len=6558	Pisuviricota	GUT_GENOME011995	d__Bacteria;p__Spirochaetota;c__Spirochaetia;o__Treponematales;f__Treponemataceae;g__Treponema_D;s__	24	0	3.09e-05
GUT_GENOME170660|NODE_42_length_87212_cov_19.426655|1|8	SRR11648360|k141_238775_flag=1_multi=340.0000_len=9219	Pisuviricota	GUT_GENOME011995	d__Bacteria;p__Spirochaetota;c__Spirochaetia;o__Treponematales;f__Treponemataceae;g__Treponema_D;s__	24	0	3.09e-05
GUT_GENOME170660|NODE_42_length_87212_cov_19.426655|1|8	BC-0345649514|k141_807	Pisuviricota	GUT_GENOME011995	d__Bacteria;p__Spirochaetota;c__Spirochaetia;o__Treponematales;f__Treponemataceae;g__Treponema_D;s__	24	0	3.09e-05
GUT_GENOME170660|NODE_42_length_87212_cov_19.426655|1|8	SRR11648202|k141_322_flag=0_multi=521.7310_len=1955	Pisuviricota	GUT_GENOME011995	d__Bacteria;p__Spirochaetota;c__Spirochaetia;o__Treponematales;f__Treponemataceae;g__Treponema_D;s__	24	0	3.09e-05
GUT_GENOME170660|NODE_42_length_87212_cov_19.426655|1|8	SRR11450580|k141_1194_flag=1_multi=129.0000_len=9098	Pisuviricota	GUT_GENOME011995	d__Bacteria;p__Spirochaetota;c__Spirochaetia;o__Treponematales;f__Treponemataceae;g__Treponema_D;s__	24	0	3.09e-05
GUT_GENOME170660|NODE_42_length_87212_cov_19.426655|1|8	SRR11450579|k141_17049_flag=1_multi=4764.0000_len=8934	Pisuviricota	GUT_GENOME011995	d__Bacteria;p__Spirochaetota;c__Spirochaetia;o__Treponematales;f__Treponemataceae;g__Treponema_D;s__	24	0	3.09e-05
GUT_GENOME170660|NODE_42_length_87212_cov_19.426655|1|8	BC-0345318769|k141_41055	Pisuviricota	GUT_GENOME011995	d__Bacteria;p__Spirochaetota;c__Spirochaetia;o__Treponematales;f__Treponemataceae;g__Treponema_D;s__	24	0	3.09e-05
GUT_GENOME170660|NODE_42_length_87212_cov_19.426655|1|8	SRR11649087|k141_2929_flag=1_multi=251.0000_len=9689	Pisuviricota	GUT_GENOME011995	d__Bacteria;p__Spirochaetota;c__Spirochaetia;o__Treponematales;f__Treponemataceae;g__Treponema_D;s__	24	0	3.09e-05
GUT_GENOME170660|NODE_42_length_87212_cov_19.426655|1|8	BC-0345317873|k141_88724	Pisuviricota	GUT_GENOME011995	d__Bacteria;p__Spirochaetota;c__Spirochaetia;o__Treponematales;f__Treponemataceae;g__Treponema_D;s__	24	0	3.09e-05
GUT_GENOME170660|NODE_42_length_87212_cov_19.426655|1|8	SRR11450579|k141_17049_flag=1_multi=4764.0000_len=8934	Pisuviricota	GUT_GENOME011995	d__Bacteria;p__Spirochaetota;c__Spirochaetia;o__Treponematales;f__Treponemataceae;g__Treponema_D;s__	24	0	3.09e-05
GUT_GENOME170660|NODE_42_length_87212_cov_19.426655|1|8	BC-0302413540|k141_158	Kitrinoviricota	GUT_GENOME011995	d__Bacteria;p__Spirochaetota;c__Spirochaetia;o__Treponematales;f__Treponemataceae;g__Treponema_D;s__	24	0	3.09e-05
GUT_GENOME170660|NODE_42_length_87212_cov_19.426655|1|8	SRR11450578|k141_2066_flag=1_multi=317.0000_len=8175	Pisuviricota	GUT_GENOME011995	d__Bacteria;p__Spirochaetota;c__Spirochaetia;o__Treponematales;f__Treponemataceae;g__Treponema_D;s__	24	0	3.09e-05
GUT_GENOME170660|NODE_42_length_87212_cov_19.426655|1|8	BC-0345649514|k141_807	Pisuviricota	GUT_GENOME011995	d__Bacteria;p__Spirochaetota;c__Spirochaetia;o__Treponematales;f__Treponemataceae;g__Treponema_D;s__	24	0	3.09e-05
GUT_GENOME170660|NODE_42_length_87212_cov_19.426655|1|8	SRR11450579|k141_76622_flag=1_multi=211.0000_len=8995	Pisuviricota	GUT_GENOME011995	d__Bacteria;p__Spirochaetota;c__Spirochaetia;o__Treponematales;f__Treponemataceae;g__Treponema_D;s__	24	0	3.09e-05
GUT_GENOME170660|NODE_42_length_87212_cov_19.426655|1|8	SRR10849374|k141_328568_flag=1_multi=20.0000_len=3015	Lenarviricota	GUT_GENOME011995	d__Bacteria;p__Spirochaetota;c__Spirochaetia;o__Treponematales;f__Treponemataceae;g__Treponema_D;s__	24	0	3.09e-05
GUT_GENOME170660|NODE_42_length_87212_cov_19.426655|1|8	SRR11450579|k141_236588_flag=1_multi=105.0000_len=8198	Pisuviricota	GUT_GENOME011995	d__Bacteria;p__Spirochaetota;c__Spirochaetia;o__Treponematales;f__Treponemataceae;g__Treponema_D;s__	24	0	3.09e-05
GUT_GENOME170660|NODE_42_length_87212_cov_19.426655|1|8	SRR11648176|k141_60865_flag=1_multi=117.8157_len=8095	Pisuviricota	GUT_GENOME011995	d__Bacteria;p__Spirochaetota;c__Spirochaetia;o__Treponematales;f__Treponemataceae;g__Treponema_D;s__	24	0	3.09e-05
GUT_GENOME170660|NODE_42_length_87212_cov_19.426655|1|8	BC-0302413540|k141_158	Kitrinoviricota	GUT_GENOME011995	d__Bacteria;p__Spirochaetota;c__Spirochaetia;o__Treponematales;f__Treponemataceae;g__Treponema_D;s__	24	0	3.09e-05
GUT_GENOME170660|NODE_42_length_87212_cov_19.426655|1|8	SRR11450579|k141_236588_flag=1_multi=105.0000_len=8198	Pisuviricota	GUT_GENOME011995	d__Bacteria;p__Spirochaetota;c__Spirochaetia;o__Treponematales;f__Treponemataceae;g__Treponema_D;s__	24	0	3.09e-05
GUT_GENOME170660|NODE_42_length_87212_cov_19.426655|1|8	SRR11648202|k141_322_flag=0_multi=521.7310_len=1955	Pisuviricota	GUT_GENOME011995	d__Bacteria;p__Spirochaetota;c__Spirochaetia;o__Treponematales;f__Treponemataceae;g__Treponema_D;s__	24	0	3.09e-05
GUT_GENOME170660|NODE_42_length_87212_cov_19.426655|1|8	SRR11450579|k141_17049_flag=1_multi=4764.0000_len=8934	Pisuviricota	GUT_GENOME011995	d__Bacteria;p__Spirochaetota;c__Spirochaetia;o__Treponematales;f__Treponemataceae;g__Treponema_D;s__	24	0	3.09e-05
GUT_GENOME170660|NODE_42_length_87212_cov_19.426655|1|8	SRR11828900|k141_55027_flag=1_multi=15.0000_len=8550	Pisuviricota	GUT_GENOME011995	d__Bacteria;p__Spirochaetota;c__Spirochaetia;o__Treponematales;f__Treponemataceae;g__Treponema_D;s__	24	0	3.09e-05
GUT_GENOME170660|NODE_42_length_87212_cov_19.426655|1|8	SRR11450579|k141_3421_flag=1_multi=110.0000_len=8612	Pisuviricota	GUT_GENOME011995	d__Bacteria;p__Spirochaetota;c__Spirochaetia;o__Treponematales;f__Treponemataceae;g__Treponema_D;s__	24	0	3.09e-05
GUT_GENOME170660|NODE_42_length_87212_cov_19.426655|1|8	BC-0345649514|k141_807	Pisuviricota	GUT_GENOME011995	d__Bacteria;p__Spirochaetota;c__Spirochaetia;o__Treponematales;f__Treponemataceae;g__Treponema_D;s__	24	0	3.09e-05
GUT_GENOME170660|NODE_42_length_87212_cov_19.426655|1|8	SRR11450577|k141_1033_flag=1_multi=59.9742_len=2428	Pisuviricota	GUT_GENOME011995	d__Bacteria;p__Spirochaetota;c__Spirochaetia;o__Treponematales;f__Treponemataceae;g__Treponema_D;s__	24	0	3.09e-05
GUT_GENOME170660|NODE_42_length_87212_cov_19.426655|1|8	SRR11450578|k141_2066_flag=1_multi=317.0000_len=8175	Pisuviricota	GUT_GENOME011995	d__Bacteria;p__Spirochaetota;c__Spirochaetia;o__Treponematales;f__Treponemataceae;g__Treponema_D;s__	24	0	3.09e-05
GUT_GENOME170660|NODE_42_length_87212_cov_19.426655|1|8	SRR11450579|k141_17049_flag=1_multi=4764.0000_len=8934	Pisuviricota	GUT_GENOME011995	d__Bacteria;p__Spirochaetota;c__Spirochaetia;o__Treponematales;f__Treponemataceae;g__Treponema_D;s__	24	0	3.09e-05
GUT_GENOME170660|NODE_42_length_87212_cov_19.426655|1|8	SRR11649087|k141_77109_flag=1_multi=287.0000_len=9144	Pisuviricota	GUT_GENOME011995	d__Bacteria;p__Spirochaetota;c__Spirochaetia;o__Treponematales;f__Treponemataceae;g__Treponema_D;s__	24	0	3.09e-05
GUT_GENOME170660|NODE_42_length_87212_cov_19.426655|1|8	SRR11450579|k141_76622_flag=1_multi=211.0000_len=8995	Pisuviricota	GUT_GENOME011995	d__Bacteria;p__Spirochaetota;c__Spirochaetia;o__Treponematales;f__Treponemataceae;g__Treponema_D;s__	24	0	3.09e-05
GUT_GENOME170660|NODE_42_length_87212_cov_19.426655|1|8	BC-0345318742|k141_63184	Pisuviricota	GUT_GENOME011995	d__Bacteria;p__Spirochaetota;c__Spirochaetia;o__Treponematales;f__Treponemataceae;g__Treponema_D;s__	24	0	3.09e-05
GUT_GENOME170660|NODE_42_length_87212_cov_19.426655|1|8	SRR11450579|k141_17049_flag=1_multi=4764.0000_len=8934	Pisuviricota	GUT_GENOME011995	d__Bacteria;p__Spirochaetota;c__Spirochaetia;o__Treponematales;f__Treponemataceae;g__Treponema_D;s__	24	0	3.09e-05
GUT_GENOME170660|NODE_42_length_87212_cov_19.426655|1|8	BC-0345724490|k141_9515	Duplornaviricota	GUT_GENOME011995	d__Bacteria;p__Spirochaetota;c__Spirochaetia;o__Treponematales;f__Treponemataceae;g__Treponema_D;s__	24	0	3.09e-05
GUT_GENOME170660|NODE_42_length_87212_cov_19.426655|1|8	SRR11450577|k141_1033_flag=1_multi=59.9742_len=2428	Pisuviricota	GUT_GENOME011995	d__Bacteria;p__Spirochaetota;c__Spirochaetia;o__Treponematales;f__Treponemataceae;g__Treponema_D;s__	24	0	3.09e-05
GUT_GENOME170660|NODE_42_length_87212_cov_19.426655|1|8	SRR11450579|k141_17049_flag=1_multi=4764.0000_len=8934	Pisuviricota	GUT_GENOME011995	d__Bacteria;p__Spirochaetota;c__Spirochaetia;o__Treponematales;f__Treponemataceae;g__Treponema_D;s__	24	0	3.09e-05
GUT_GENOME170660|NODE_42_length_87212_cov_19.426655|1|8	SRR11450586|k141_213458_flag=1_multi=6442.8094_len=10045	Pisuviricota	GUT_GENOME011995	d__Bacteria;p__Spirochaetota;c__Spirochaetia;o__Treponematales;f__Treponemataceae;g__Treponema_D;s__	24	0	3.09e-05
GUT_GENOME170660|NODE_42_length_87212_cov_19.426655|1|8	BC-0345649514|k141_807	Pisuviricota	GUT_GENOME011995	d__Bacteria;p__Spirochaetota;c__Spirochaetia;o__Treponematales;f__Treponemataceae;g__Treponema_D;s__	24	0	3.09e-05
GUT_GENOME170660|NODE_42_length_87212_cov_19.426655|1|8	SRR11648202|k141_322_flag=0_multi=521.7310_len=1955	Pisuviricota	GUT_GENOME011995	d__Bacteria;p__Spirochaetota;c__Spirochaetia;o__Treponematales;f__Treponemataceae;g__Treponema_D;s__	24	0	3.09e-05
GUT_GENOME170660|NODE_42_length_87212_cov_19.426655|1|8	SRR11450579|k141_3421_flag=1_multi=110.0000_len=8612	Pisuviricota	GUT_GENOME011995	d__Bacteria;p__Spirochaetota;c__Spirochaetia;o__Treponematales;f__Treponemataceae;g__Treponema_D;s__	24	0	3.09e-05
GUT_GENOME170660|NODE_42_length_87212_cov_19.426655|1|8	SRR11450580|k141_109913_flag=1_multi=102.0000_len=6558	Pisuviricota	GUT_GENOME011995	d__Bacteria;p__Spirochaetota;c__Spirochaetia;o__Treponematales;f__Treponemataceae;g__Treponema_D;s__	24	0	3.09e-05
GUT_GENOME170660|NODE_42_length_87212_cov_19.426655|1|8	SRR11649087|k141_2929_flag=1_multi=251.0000_len=9689	Pisuviricota	GUT_GENOME011995	d__Bacteria;p__Spirochaetota;c__Spirochaetia;o__Treponematales;f__Treponemataceae;g__Treponema_D;s__	24	0	3.09e-05
GUT_GENOME170660|NODE_42_length_87212_cov_19.426655|1|8	SRR11450579|k141_3421_flag=1_multi=110.0000_len=8612	Pisuviricota	GUT_GENOME011995	d__Bacteria;p__Spirochaetota;c__Spirochaetia;o__Treponematales;f__Treponemataceae;g__Treponema_D;s__	24	0	3.09e-05
GUT_GENOME170660|NODE_42_length_87212_cov_19.426655|1|8	SRR11450577|k141_1033_flag=1_multi=59.9742_len=2428	Pisuviricota	GUT_GENOME011995	d__Bacteria;p__Spirochaetota;c__Spirochaetia;o__Treponematales;f__Treponemataceae;g__Treponema_D;s__	24	0	3.09e-05
GUT_GENOME170660|NODE_42_length_87212_cov_19.426655|1|8	SRR10849374|k141_328568_flag=1_multi=20.0000_len=3015	Lenarviricota	GUT_GENOME011995	d__Bacteria;p__Spirochaetota;c__Spirochaetia;o__Treponematales;f__Treponemataceae;g__Treponema_D;s__	24	0	3.09e-05
GUT_GENOME170660|NODE_42_length_87212_cov_19.426655|1|8	SRR11450579|k141_3421_flag=1_multi=110.0000_len=8612	Pisuviricota	GUT_GENOME011995	d__Bacteria;p__Spirochaetota;c__Spirochaetia;o__Treponematales;f__Treponemataceae;g__Treponema_D;s__	24	0	3.09e-05
GUT_GENOME170660|NODE_42_length_87212_cov_19.426655|1|8	SRR11450580|k141_109913_flag=1_multi=102.0000_len=6558	Pisuviricota	GUT_GENOME011995	d__Bacteria;p__Spirochaetota;c__Spirochaetia;o__Treponematales;f__Treponemataceae;g__Treponema_D;s__	24	0	3.09e-05
GUT_GENOME170660|NODE_42_length_87212_cov_19.426655|1|8	BC-0302417267|k141_472	Kitrinoviricota	GUT_GENOME011995	d__Bacteria;p__Spirochaetota;c__Spirochaetia;o__Treponematales;f__Treponemataceae;g__Treponema_D;s__	24	0	3.09e-05
GUT_GENOME170660|NODE_42_length_87212_cov_19.426655|1|8	BC-0345649514|k141_807	Pisuviricota	GUT_GENOME011995	d__Bacteria;p__Spirochaetota;c__Spirochaetia;o__Treponematales;f__Treponemataceae;g__Treponema_D;s__	24	0	3.09e-05
GUT_GENOME170660|NODE_42_length_87212_cov_19.426655|1|8	SRR11828900|k141_55027_flag=1_multi=15.0000_len=8550	Pisuviricota	GUT_GENOME011995	d__Bacteria;p__Spirochaetota;c__Spirochaetia;o__Treponematales;f__Treponemataceae;g__Treponema_D;s__	24	0	3.09e-05
GUT_GENOME170660|NODE_42_length_87212_cov_19.426655|1|8	SRR11450580|k141_1194_flag=1_multi=129.0000_len=9098	Pisuviricota	GUT_GENOME011995	d__Bacteria;p__Spirochaetota;c__Spirochaetia;o__Treponematales;f__Treponemataceae;g__Treponema_D;s__	24	0	3.09e-05
GUT_GENOME170660|NODE_42_length_87212_cov_19.426655|1|8	SRR11450579|k141_3421_flag=1_multi=110.0000_len=8612	Pisuviricota	GUT_GENOME011995	d__Bacteria;p__Spirochaetota;c__Spirochaetia;o__Treponematales;f__Treponemataceae;g__Treponema_D;s__	24	0	3.09e-05
GUT_GENOME170660|NODE_42_length_87212_cov_19.426655|1|8	SRR11648202|k141_322_flag=0_multi=521.7310_len=1955	Pisuviricota	GUT_GENOME011995	d__Bacteria;p__Spirochaetota;c__Spirochaetia;o__Treponematales;f__Treponemataceae;g__Treponema_D;s__	24	0	3.09e-05
GUT_GENOME170660|NODE_42_length_87212_cov_19.426655|1|8	SRR11450579|k141_17049_flag=1_multi=4764.0000_len=8934	Pisuviricota	GUT_GENOME011995	d__Bacteria;p__Spirochaetota;c__Spirochaetia;o__Treponematales;f__Treponemataceae;g__Treponema_D;s__	24	0	3.09e-05
GUT_GENOME170660|NODE_42_length_87212_cov_19.426655|1|8	BC-0302413540|k141_158	Kitrinoviricota	GUT_GENOME011995	d__Bacteria;p__Spirochaetota;c__Spirochaetia;o__Treponematales;f__Treponemataceae;g__Treponema_D;s__	24	0	3.09e-05
GUT_GENOME170660|NODE_42_length_87212_cov_19.426655|1|8	BC-0345724490|k141_9515	Duplornaviricota	GUT_GENOME011995	d__Bacteria;p__Spirochaetota;c__Spirochaetia;o__Treponematales;f__Treponemataceae;g__Treponema_D;s__	24	0	3.09e-05
GUT_GENOME170660|NODE_42_length_87212_cov_19.426655|1|8	SRR11563379|k141_984_flag=1_multi=10.0000_len=5356	Pisuviricota	GUT_GENOME011995	d__Bacteria;p__Spirochaetota;c__Spirochaetia;o__Treponematales;f__Treponemataceae;g__Treponema_D;s__	24	0	3.09e-05
GUT_GENOME170660|NODE_42_length_87212_cov_19.426655|1|8	SRR11450577|k141_1033_flag=1_multi=59.9742_len=2428	Pisuviricota	GUT_GENOME011995	d__Bacteria;p__Spirochaetota;c__Spirochaetia;o__Treponematales;f__Treponemataceae;g__Treponema_D;s__	24	0	3.09e-05
GUT_GENOME170660|NODE_42_length_87212_cov_19.426655|1|8	SRR11450578|k141_2066_flag=1_multi=317.0000_len=8175	Pisuviricota	GUT_GENOME011995	d__Bacteria;p__Spirochaetota;c__Spirochaetia;o__Treponematales;f__Treponemataceae;g__Treponema_D;s__	24	0	3.09e-05
GUT_GENOME170660|NODE_42_length_87212_cov_19.426655|1|8	BC-0302417267|k141_472	Kitrinoviricota	GUT_GENOME011995	d__Bacteria;p__Spirochaetota;c__Spirochaetia;o__Treponematales;f__Treponemataceae;g__Treponema_D;s__	24	0	3.09e-05
GUT_GENOME170660|NODE_42_length_87212_cov_19.426655|1|8	BC-0345732070|k141_514	Pisuviricota	GUT_GENOME011995	d__Bacteria;p__Spirochaetota;c__Spirochaetia;o__Treponematales;f__Treponemataceae;g__Treponema_D;s__	24	0	3.09e-05
GUT_GENOME170660|NODE_42_length_87212_cov_19.426655|1|8	SRR11649087|k141_263042_flag=1_multi=27.0000_len=4125	Kitrinoviricota	GUT_GENOME011995	d__Bacteria;p__Spirochaetota;c__Spirochaetia;o__Treponematales;f__Treponemataceae;g__Treponema_D;s__	24	0	3.09e-05
GUT_GENOME170660|NODE_42_length_87212_cov_19.426655|1|8	SRR11648176|k141_60865_flag=1_multi=117.8157_len=8095	Pisuviricota	GUT_GENOME011995	d__Bacteria;p__Spirochaetota;c__Spirochaetia;o__Treponematales;f__Treponemataceae;g__Treponema_D;s__	24	0	3.09e-05
GUT_GENOME170660|NODE_42_length_87212_cov_19.426655|1|8	SRR11648360|k141_2427_flag=0_multi=550.5579_len=8547	Pisuviricota	GUT_GENOME011995	d__Bacteria;p__Spirochaetota;c__Spirochaetia;o__Treponematales;f__Treponemataceae;g__Treponema_D;s__	24	0	3.09e-05
GUT_GENOME170660|NODE_42_length_87212_cov_19.426655|1|8	BC-0302417267|k141_472	Kitrinoviricota	GUT_GENOME011995	d__Bacteria;p__Spirochaetota;c__Spirochaetia;o__Treponematales;f__Treponemataceae;g__Treponema_D;s__	24	0	3.09e-05
GUT_GENOME170660|NODE_42_length_87212_cov_19.426655|1|8	BC-0345649514|k141_807	Pisuviricota	GUT_GENOME011995	d__Bacteria;p__Spirochaetota;c__Spirochaetia;o__Treponematales;f__Treponemataceae;g__Treponema_D;s__	24	0	3.09e-05
GUT_GENOME170660|NODE_42_length_87212_cov_19.426655|1|8	BC-0345732070|k141_514	Pisuviricota	GUT_GENOME011995	d__Bacteria;p__Spirochaetota;c__Spirochaetia;o__Treponematales;f__Treponemataceae;g__Treponema_D;s__	24	0	3.09e-05
GUT_GENOME170660|NODE_42_length_87212_cov_19.426655|1|8	SRR11450577|k141_1033_flag=1_multi=59.9742_len=2428	Pisuviricota	GUT_GENOME011995	d__Bacteria;p__Spirochaetota;c__Spirochaetia;o__Treponematales;f__Treponemataceae;g__Treponema_D;s__	24	0	3.09e-05
GUT_GENOME170660|NODE_42_length_87212_cov_19.426655|1|8	SRR11450579|k141_17049_flag=1_multi=4764.0000_len=8934	Pisuviricota	GUT_GENOME011995	d__Bacteria;p__Spirochaetota;c__Spirochaetia;o__Treponematales;f__Treponemataceae;g__Treponema_D;s__	24	0	3.09e-05
GUT_GENOME170660|NODE_42_length_87212_cov_19.426655|1|8	BC-0345732070|k141_514	Pisuviricota	GUT_GENOME011995	d__Bacteria;p__Spirochaetota;c__Spirochaetia;o__Treponematales;f__Treponemataceae;g__Treponema_D;s__	24	0	3.09e-05
GUT_GENOME170660|NODE_42_length_87212_cov_19.426655|1|8	SRR11648176|k141_60865_flag=1_multi=117.8157_len=8095	Pisuviricota	GUT_GENOME011995	d__Bacteria;p__Spirochaetota;c__Spirochaetia;o__Treponematales;f__Treponemataceae;g__Treponema_D;s__	24	0	3.09e-05
GUT_GENOME170660|NODE_42_length_87212_cov_19.426655|1|8	SRR11450579|k141_76622_flag=1_multi=211.0000_len=8995	Pisuviricota	GUT_GENOME011995	d__Bacteria;p__Spirochaetota;c__Spirochaetia;o__Treponematales;f__Treponemataceae;g__Treponema_D;s__	24	0	3.09e-05
GUT_GENOME170660|NODE_42_length_87212_cov_19.426655|1|8	SRR11450578|k141_2066_flag=1_multi=317.0000_len=8175	Pisuviricota	GUT_GENOME011995	d__Bacteria;p__Spirochaetota;c__Spirochaetia;o__Treponematales;f__Treponemataceae;g__Treponema_D;s__	24	0	3.09e-05
GUT_GENOME170660|NODE_42_length_87212_cov_19.426655|1|8	BC-0345794107|k141_11800	Pisuviricota	GUT_GENOME011995	d__Bacteria;p__Spirochaetota;c__Spirochaetia;o__Treponematales;f__Treponemataceae;g__Treponema_D;s__	22	0	0.000399
GUT_GENOME170660|NODE_42_length_87212_cov_19.426655|1|8	BC-0345724490|k141_9515	Duplornaviricota	GUT_GENOME011995	d__Bacteria;p__Spirochaetota;c__Spirochaetia;o__Treponematales;f__Treponemataceae;g__Treponema_D;s__	24	0	3.09e-05
GUT_GENOME170660|NODE_42_length_87212_cov_19.426655|1|8	SRR11450580|k141_109913_flag=1_multi=102.0000_len=6558	Pisuviricota	GUT_GENOME011995	d__Bacteria;p__Spirochaetota;c__Spirochaetia;o__Treponematales;f__Treponemataceae;g__Treponema_D;s__	24	0	3.09e-05
GUT_GENOME170660|NODE_42_length_87212_cov_19.426655|1|8	SRR11450580|k141_109913_flag=1_multi=102.0000_len=6558	Pisuviricota	GUT_GENOME011995	d__Bacteria;p__Spirochaetota;c__Spirochaetia;o__Treponematales;f__Treponemataceae;g__Treponema_D;s__	24	0	3.09e-05
GUT_GENOME170660|NODE_42_length_87212_cov_19.426655|1|8	SRR11648176|k141_60865_flag=1_multi=117.8157_len=8095	Pisuviricota	GUT_GENOME011995	d__Bacteria;p__Spirochaetota;c__Spirochaetia;o__Treponematales;f__Treponemataceae;g__Treponema_D;s__	24	0	3.09e-05
GUT_GENOME170660|NODE_42_length_87212_cov_19.426655|1|8	SRR11450579|k141_17049_flag=1_multi=4764.0000_len=8934	Pisuviricota	GUT_GENOME011995	d__Bacteria;p__Spirochaetota;c__Spirochaetia;o__Treponematales;f__Treponemataceae;g__Treponema_D;s__	24	0	3.09e-05
GUT_GENOME170660|NODE_42_length_87212_cov_19.426655|1|8	SRR11649087|k141_77109_flag=1_multi=287.0000_len=9144	Pisuviricota	GUT_GENOME011995	d__Bacteria;p__Spirochaetota;c__Spirochaetia;o__Treponematales;f__Treponemataceae;g__Treponema_D;s__	24	0	3.09e-05
GUT_GENOME170660|NODE_42_length_87212_cov_19.426655|1|8	BC-0345318789|k141_1934	Pisuviricota	GUT_GENOME011995	d__Bacteria;p__Spirochaetota;c__Spirochaetia;o__Treponematales;f__Treponemataceae;g__Treponema_D;s__	24	0	3.09e-05
GUT_GENOME170660|NODE_42_length_87212_cov_19.426655|1|8	SRR11450577|k141_1033_flag=1_multi=59.9742_len=2428	Pisuviricota	GUT_GENOME011995	d__Bacteria;p__Spirochaetota;c__Spirochaetia;o__Treponematales;f__Treponemataceae;g__Treponema_D;s__	24	0	3.09e-05
GUT_GENOME170660|NODE_42_length_87212_cov_19.426655|1|8	SRR10849374|k141_328568_flag=1_multi=20.0000_len=3015	Lenarviricota	GUT_GENOME011995	d__Bacteria;p__Spirochaetota;c__Spirochaetia;o__Treponematales;f__Treponemataceae;g__Treponema_D;s__	24	0	3.09e-05
GUT_GENOME170660|NODE_42_length_87212_cov_19.426655|1|8	SRR11450579|k141_17049_flag=1_multi=4764.0000_len=8934	Pisuviricota	GUT_GENOME011995	d__Bacteria;p__Spirochaetota;c__Spirochaetia;o__Treponematales;f__Treponemataceae;g__Treponema_D;s__	24	0	3.09e-05
GUT_GENOME170660|NODE_42_length_87212_cov_19.426655|1|8	SRR11450579|k141_17049_flag=1_multi=4764.0000_len=8934	Pisuviricota	GUT_GENOME011995	d__Bacteria;p__Spirochaetota;c__Spirochaetia;o__Treponematales;f__Treponemataceae;g__Treponema_D;s__	24	0	3.09e-05
GUT_GENOME170660|NODE_42_length_87212_cov_19.426655|1|8	SRR11829260|k141_2197_flag=1_multi=57.0000_len=4196	Kitrinoviricota	GUT_GENOME011995	d__Bacteria;p__Spirochaetota;c__Spirochaetia;o__Treponematales;f__Treponemataceae;g__Treponema_D;s__	24	0	3.09e-05
GUT_GENOME170660|NODE_42_length_87212_cov_19.426655|1|8	BC-0302413540|k141_158	Kitrinoviricota	GUT_GENOME011995	d__Bacteria;p__Spirochaetota;c__Spirochaetia;o__Treponematales;f__Treponemataceae;g__Treponema_D;s__	24	0	3.09e-05
GUT_GENOME170660|NODE_42_length_87212_cov_19.426655|1|8	BC-0345318742|k141_798	Duplornaviricota	GUT_GENOME011995	d__Bacteria;p__Spirochaetota;c__Spirochaetia;o__Treponematales;f__Treponemataceae;g__Treponema_D;s__	23	0	0.000111
GUT_GENOME170660|NODE_42_length_87212_cov_19.426655|1|8	BC-0345724490|k141_9515	Duplornaviricota	GUT_GENOME011995	d__Bacteria;p__Spirochaetota;c__Spirochaetia;o__Treponematales;f__Treponemataceae;g__Treponema_D;s__	24	0	3.09e-05
GUT_GENOME170660|NODE_42_length_87212_cov_19.426655|1|8	SRR11450580|k141_1194_flag=1_multi=129.0000_len=9098	Pisuviricota	GUT_GENOME011995	d__Bacteria;p__Spirochaetota;c__Spirochaetia;o__Treponematales;f__Treponemataceae;g__Treponema_D;s__	24	0	3.09e-05
GUT_GENOME170660|NODE_42_length_87212_cov_19.426655|1|8	SRR11450579|k141_17049_flag=1_multi=4764.0000_len=8934	Pisuviricota	GUT_GENOME011995	d__Bacteria;p__Spirochaetota;c__Spirochaetia;o__Treponematales;f__Treponemataceae;g__Treponema_D;s__	24	0	3.09e-05
GUT_GENOME170660|NODE_42_length_87212_cov_19.426655|1|8	SRR11450586|k141_213458_flag=1_multi=6442.8094_len=10045	Pisuviricota	GUT_GENOME011995	d__Bacteria;p__Spirochaetota;c__Spirochaetia;o__Treponematales;f__Treponemataceae;g__Treponema_D;s__	24	0	3.09e-05
GUT_GENOME170660|NODE_42_length_87212_cov_19.426655|1|8	SRR11450578|k141_2066_flag=1_multi=317.0000_len=8175	Pisuviricota	GUT_GENOME011995	d__Bacteria;p__Spirochaetota;c__Spirochaetia;o__Treponematales;f__Treponemataceae;g__Treponema_D;s__	24	0	3.09e-05
GUT_GENOME170660|NODE_42_length_87212_cov_19.426655|1|8	SRR11450579|k141_17049_flag=1_multi=4764.0000_len=8934	Pisuviricota	GUT_GENOME011995	d__Bacteria;p__Spirochaetota;c__Spirochaetia;o__Treponematales;f__Treponemataceae;g__Treponema_D;s__	24	0	3.09e-05
GUT_GENOME170660|NODE_42_length_87212_cov_19.426655|1|8	SRR11450579|k141_17049_flag=1_multi=4764.0000_len=8934	Pisuviricota	GUT_GENOME011995	d__Bacteria;p__Spirochaetota;c__Spirochaetia;o__Treponematales;f__Treponemataceae;g__Treponema_D;s__	24	0	3.09e-05
GUT_GENOME170660|NODE_42_length_87212_cov_19.426655|1|8	SRR17481244|k141_434_flag=1_multi=161.0000_len=2746	Kitrinoviricota	GUT_GENOME011995	d__Bacteria;p__Spirochaetota;c__Spirochaetia;o__Treponematales;f__Treponemataceae;g__Treponema_D;s__	24	0	3.09e-05
GUT_GENOME170660|NODE_42_length_87212_cov_19.426655|1|8	SRR11450579|k141_236588_flag=1_multi=105.0000_len=8198	Pisuviricota	GUT_GENOME011995	d__Bacteria;p__Spirochaetota;c__Spirochaetia;o__Treponematales;f__Treponemataceae;g__Treponema_D;s__	24	0	3.09e-05
GUT_GENOME170660|NODE_42_length_87212_cov_19.426655|1|8	SRR11648176|k141_60865_flag=1_multi=117.8157_len=8095	Pisuviricota	GUT_GENOME011995	d__Bacteria;p__Spirochaetota;c__Spirochaetia;o__Treponematales;f__Treponemataceae;g__Treponema_D;s__	24	0	3.09e-05
GUT_GENOME170660|NODE_42_length_87212_cov_19.426655|1|8	SRR11450578|k141_2066_flag=1_multi=317.0000_len=8175	Pisuviricota	GUT_GENOME011995	d__Bacteria;p__Spirochaetota;c__Spirochaetia;o__Treponematales;f__Treponemataceae;g__Treponema_D;s__	24	0	3.09e-05
GUT_GENOME170660|NODE_42_length_87212_cov_19.426655|1|8	BC-0345649514|k141_807	Pisuviricota	GUT_GENOME011995	d__Bacteria;p__Spirochaetota;c__Spirochaetia;o__Treponematales;f__Treponemataceae;g__Treponema_D;s__	24	0	3.09e-05
GUT_GENOME170660|NODE_42_length_87212_cov_19.426655|1|8	SRR11450586|k141_213458_flag=1_multi=6442.8094_len=10045	Pisuviricota	GUT_GENOME011995	d__Bacteria;p__Spirochaetota;c__Spirochaetia;o__Treponematales;f__Treponemataceae;g__Treponema_D;s__	24	0	3.09e-05
GUT_GENOME170660|NODE_42_length_87212_cov_19.426655|1|8	SRR10849374|k141_328568_flag=1_multi=20.0000_len=3015	Lenarviricota	GUT_GENOME011995	d__Bacteria;p__Spirochaetota;c__Spirochaetia;o__Treponematales;f__Treponemataceae;g__Treponema_D;s__	24	0	3.09e-05
GUT_GENOME170660|NODE_42_length_87212_cov_19.426655|1|8	SRR11450579|k141_236588_flag=1_multi=105.0000_len=8198	Pisuviricota	GUT_GENOME011995	d__Bacteria;p__Spirochaetota;c__Spirochaetia;o__Treponematales;f__Treponemataceae;g__Treponema_D;s__	24	0	3.09e-05
GUT_GENOME170660|NODE_42_length_87212_cov_19.426655|1|8	BC-0345649514|k141_807	Pisuviricota	GUT_GENOME011995	d__Bacteria;p__Spirochaetota;c__Spirochaetia;o__Treponematales;f__Treponemataceae;g__Treponema_D;s__	24	0	3.09e-05
GUT_GENOME170660|NODE_42_length_87212_cov_19.426655|1|8	SRR11648176|k141_60865_flag=1_multi=117.8157_len=8095	Pisuviricota	GUT_GENOME011995	d__Bacteria;p__Spirochaetota;c__Spirochaetia;o__Treponematales;f__Treponemataceae;g__Treponema_D;s__	24	0	3.09e-05
GUT_GENOME170660|NODE_42_length_87212_cov_19.426655|1|8	BC-0345649514|k141_807	Pisuviricota	GUT_GENOME011995	d__Bacteria;p__Spirochaetota;c__Spirochaetia;o__Treponematales;f__Treponemataceae;g__Treponema_D;s__	24	0	3.09e-05
GUT_GENOME170660|NODE_42_length_87212_cov_19.426655|1|8	SRR11450580|k141_1194_flag=1_multi=129.0000_len=9098	Pisuviricota	GUT_GENOME011995	d__Bacteria;p__Spirochaetota;c__Spirochaetia;o__Treponematales;f__Treponemataceae;g__Treponema_D;s__	24	0	3.09e-05
GUT_GENOME170660|NODE_42_length_87212_cov_19.426655|1|8	SRR11648202|k141_322_flag=0_multi=521.7310_len=1955	Pisuviricota	GUT_GENOME011995	d__Bacteria;p__Spirochaetota;c__Spirochaetia;o__Treponematales;f__Treponemataceae;g__Treponema_D;s__	24	0	3.09e-05
GUT_GENOME170660|NODE_42_length_87212_cov_19.426655|1|8	SRR11450580|k141_109913_flag=1_multi=102.0000_len=6558	Pisuviricota	GUT_GENOME011995	d__Bacteria;p__Spirochaetota;c__Spirochaetia;o__Treponematales;f__Treponemataceae;g__Treponema_D;s__	24	0	3.09e-05
GUT_GENOME170660|NODE_42_length_87212_cov_19.426655|1|8	SRR11450579|k141_17049_flag=1_multi=4764.0000_len=8934	Pisuviricota	GUT_GENOME011995	d__Bacteria;p__Spirochaetota;c__Spirochaetia;o__Treponematales;f__Treponemataceae;g__Treponema_D;s__	24	0	3.09e-05
GUT_GENOME170660|NODE_42_length_87212_cov_19.426655|1|8	SRR11648202|k141_322_flag=0_multi=521.7310_len=1955	Pisuviricota	GUT_GENOME011995	d__Bacteria;p__Spirochaetota;c__Spirochaetia;o__Treponematales;f__Treponemataceae;g__Treponema_D;s__	24	0	3.09e-05
GUT_GENOME170660|NODE_42_length_87212_cov_19.426655|1|8	SRR11450577|k141_1033_flag=1_multi=59.9742_len=2428	Pisuviricota	GUT_GENOME011995	d__Bacteria;p__Spirochaetota;c__Spirochaetia;o__Treponematales;f__Treponemataceae;g__Treponema_D;s__	24	0	3.09e-05
GUT_GENOME170660|NODE_42_length_87212_cov_19.426655|1|8	SRR10849374|k141_328568_flag=1_multi=20.0000_len=3015	Lenarviricota	GUT_GENOME011995	d__Bacteria;p__Spirochaetota;c__Spirochaetia;o__Treponematales;f__Treponemataceae;g__Treponema_D;s__	24	0	3.09e-05
GUT_GENOME170660|NODE_42_length_87212_cov_19.426655|1|8	SRR11450579|k141_76622_flag=1_multi=211.0000_len=8995	Pisuviricota	GUT_GENOME011995	d__Bacteria;p__Spirochaetota;c__Spirochaetia;o__Treponematales;f__Treponemataceae;g__Treponema_D;s__	24	0	3.09e-05
GUT_GENOME170660|NODE_42_length_87212_cov_19.426655|1|8	BC-0302417267|k141_472	Kitrinoviricota	GUT_GENOME011995	d__Bacteria;p__Spirochaetota;c__Spirochaetia;o__Treponematales;f__Treponemataceae;g__Treponema_D;s__	24	0	3.09e-05
GUT_GENOME170660|NODE_42_length_87212_cov_19.426655|1|8	BC-0345318742|k141_63184	Pisuviricota	GUT_GENOME011995	d__Bacteria;p__Spirochaetota;c__Spirochaetia;o__Treponematales;f__Treponemataceae;g__Treponema_D;s__	24	0	3.09e-05
GUT_GENOME170660|NODE_42_length_87212_cov_19.426655|1|8	SRR10849374|k141_328568_flag=1_multi=20.0000_len=3015	Lenarviricota	GUT_GENOME011995	d__Bacteria;p__Spirochaetota;c__Spirochaetia;o__Treponematales;f__Treponemataceae;g__Treponema_D;s__	24	0	3.09e-05
GUT_GENOME170660|NODE_42_length_87212_cov_19.426655|1|8	SRR11450578|k141_2066_flag=1_multi=317.0000_len=8175	Pisuviricota	GUT_GENOME011995	d__Bacteria;p__Spirochaetota;c__Spirochaetia;o__Treponematales;f__Treponemataceae;g__Treponema_D;s__	24	0	3.09e-05
GUT_GENOME170660|NODE_42_length_87212_cov_19.426655|1|8	SRR11829143|k141_119731_flag=1_multi=545.5096_len=9090	Pisuviricota	GUT_GENOME011995	d__Bacteria;p__Spirochaetota;c__Spirochaetia;o__Treponematales;f__Treponemataceae;g__Treponema_D;s__	24	0	3.09e-05
GUT_GENOME170660|NODE_42_length_87212_cov_19.426655|1|8	SRR11450577|k141_1033_flag=1_multi=59.9742_len=2428	Pisuviricota	GUT_GENOME011995	d__Bacteria;p__Spirochaetota;c__Spirochaetia;o__Treponematales;f__Treponemataceae;g__Treponema_D;s__	24	0	3.09e-05
GUT_GENOME170660|NODE_42_length_87212_cov_19.426655|1|8	BC-0345318769|k141_41055	Pisuviricota	GUT_GENOME011995	d__Bacteria;p__Spirochaetota;c__Spirochaetia;o__Treponematales;f__Treponemataceae;g__Treponema_D;s__	24	0	3.09e-05
GUT_GENOME170660|NODE_42_length_87212_cov_19.426655|1|8	BC-0345318769|k141_41055	Pisuviricota	GUT_GENOME011995	d__Bacteria;p__Spirochaetota;c__Spirochaetia;o__Treponematales;f__Treponemataceae;g__Treponema_D;s__	24	0	3.09e-05
GUT_GENOME170660|NODE_42_length_87212_cov_19.426655|1|8	SRR11450579|k141_236588_flag=1_multi=105.0000_len=8198	Pisuviricota	GUT_GENOME011995	d__Bacteria;p__Spirochaetota;c__Spirochaetia;o__Treponematales;f__Treponemataceae;g__Treponema_D;s__	24	0	3.09e-05
GUT_GENOME170660|NODE_42_length_87212_cov_19.426655|1|8	SRR11648202|k141_322_flag=0_multi=521.7310_len=1955	Pisuviricota	GUT_GENOME011995	d__Bacteria;p__Spirochaetota;c__Spirochaetia;o__Treponematales;f__Treponemataceae;g__Treponema_D;s__	24	0	3.09e-05
GUT_GENOME170660|NODE_42_length_87212_cov_19.426655|1|8	SRR11450580|k141_1194_flag=1_multi=129.0000_len=9098	Pisuviricota	GUT_GENOME011995	d__Bacteria;p__Spirochaetota;c__Spirochaetia;o__Treponematales;f__Treponemataceae;g__Treponema_D;s__	24	0	3.09e-05
GUT_GENOME170660|NODE_42_length_87212_cov_19.426655|1|8	SRR11450579|k141_17049_flag=1_multi=4764.0000_len=8934	Pisuviricota	GUT_GENOME011995	d__Bacteria;p__Spirochaetota;c__Spirochaetia;o__Treponematales;f__Treponemataceae;g__Treponema_D;s__	24	0	3.09e-05
GUT_GENOME170660|NODE_42_length_87212_cov_19.426655|1|8	BC-0345318769|k141_41055	Pisuviricota	GUT_GENOME011995	d__Bacteria;p__Spirochaetota;c__Spirochaetia;o__Treponematales;f__Treponemataceae;g__Treponema_D;s__	24	0	3.09e-05
GUT_GENOME170660|NODE_42_length_87212_cov_19.426655|1|8	BC-0345318769|k141_41055	Pisuviricota	GUT_GENOME011995	d__Bacteria;p__Spirochaetota;c__Spirochaetia;o__Treponematales;f__Treponemataceae;g__Treponema_D;s__	24	0	3.09e-05
GUT_GENOME170660|NODE_42_length_87212_cov_19.426655|1|8	SRR11450579|k141_236588_flag=1_multi=105.0000_len=8198	Pisuviricota	GUT_GENOME011995	d__Bacteria;p__Spirochaetota;c__Spirochaetia;o__Treponematales;f__Treponemataceae;g__Treponema_D;s__	24	0	3.09e-05
GUT_GENOME170660|NODE_42_length_87212_cov_19.426655|1|8	SRR11450577|k141_1033_flag=1_multi=59.9742_len=2428	Pisuviricota	GUT_GENOME011995	d__Bacteria;p__Spirochaetota;c__Spirochaetia;o__Treponematales;f__Treponemataceae;g__Treponema_D;s__	24	0	3.09e-05
GUT_GENOME170660|NODE_42_length_87212_cov_19.426655|1|8	SRR11648202|k141_322_flag=0_multi=521.7310_len=1955	Pisuviricota	GUT_GENOME011995	d__Bacteria;p__Spirochaetota;c__Spirochaetia;o__Treponematales;f__Treponemataceae;g__Treponema_D;s__	24	0	3.09e-05
GUT_GENOME170660|NODE_42_length_87212_cov_19.426655|1|8	SRR11450580|k141_109913_flag=1_multi=102.0000_len=6558	Pisuviricota	GUT_GENOME011995	d__Bacteria;p__Spirochaetota;c__Spirochaetia;o__Treponematales;f__Treponemataceae;g__Treponema_D;s__	24	0	3.09e-05
GUT_GENOME170660|NODE_42_length_87212_cov_19.426655|1|8	SRR17481244|k141_434_flag=1_multi=161.0000_len=2746	Kitrinoviricota	GUT_GENOME011995	d__Bacteria;p__Spirochaetota;c__Spirochaetia;o__Treponematales;f__Treponemataceae;g__Treponema_D;s__	24	0	3.09e-05
GUT_GENOME170660|NODE_42_length_87212_cov_19.426655|1|8	SRR17481244|k141_434_flag=1_multi=161.0000_len=2746	Kitrinoviricota	GUT_GENOME011995	d__Bacteria;p__Spirochaetota;c__Spirochaetia;o__Treponematales;f__Treponemataceae;g__Treponema_D;s__	24	0	3.09e-05
GUT_GENOME170660|NODE_42_length_87212_cov_19.426655|1|8	BC-0345318769|k141_41055	Pisuviricota	GUT_GENOME011995	d__Bacteria;p__Spirochaetota;c__Spirochaetia;o__Treponematales;f__Treponemataceae;g__Treponema_D;s__	24	0	3.09e-05
GUT_GENOME170660|NODE_42_length_87212_cov_19.426655|1|8	SRR11450579|k141_76622_flag=1_multi=211.0000_len=8995	Pisuviricota	GUT_GENOME011995	d__Bacteria;p__Spirochaetota;c__Spirochaetia;o__Treponematales;f__Treponemataceae;g__Treponema_D;s__	24	0	3.09e-05
GUT_GENOME170660|NODE_42_length_87212_cov_19.426655|1|8	SRR11648360|k141_187449_flag=1_multi=2812.0000_len=9848	Pisuviricota	GUT_GENOME011995	d__Bacteria;p__Spirochaetota;c__Spirochaetia;o__Treponematales;f__Treponemataceae;g__Treponema_D;s__	24	0	3.09e-05
GUT_GENOME170660|NODE_42_length_87212_cov_19.426655|1|8	SRR11450580|k141_109913_flag=1_multi=102.0000_len=6558	Pisuviricota	GUT_GENOME011995	d__Bacteria;p__Spirochaetota;c__Spirochaetia;o__Treponematales;f__Treponemataceae;g__Treponema_D;s__	24	0	3.09e-05
GUT_GENOME170660|NODE_42_length_87212_cov_19.426655|1|8	SRR11450579|k141_76622_flag=1_multi=211.0000_len=8995	Pisuviricota	GUT_GENOME011995	d__Bacteria;p__Spirochaetota;c__Spirochaetia;o__Treponematales;f__Treponemataceae;g__Treponema_D;s__	24	0	3.09e-05
GUT_GENOME170660|NODE_42_length_87212_cov_19.426655|1|8	SRR11648176|k141_60865_flag=1_multi=117.8157_len=8095	Pisuviricota	GUT_GENOME011995	d__Bacteria;p__Spirochaetota;c__Spirochaetia;o__Treponematales;f__Treponemataceae;g__Treponema_D;s__	24	0	3.09e-05
GUT_GENOME170660|NODE_42_length_87212_cov_19.426655|1|8	SRR11450578|k141_2066_flag=1_multi=317.0000_len=8175	Pisuviricota	GUT_GENOME011995	d__Bacteria;p__Spirochaetota;c__Spirochaetia;o__Treponematales;f__Treponemataceae;g__Treponema_D;s__	24	0	3.09e-05
GUT_GENOME170660|NODE_42_length_87212_cov_19.426655|1|8	BC-0345649514|k141_807	Pisuviricota	GUT_GENOME011995	d__Bacteria;p__Spirochaetota;c__Spirochaetia;o__Treponematales;f__Treponemataceae;g__Treponema_D;s__	24	0	3.09e-05
GUT_GENOME170660|NODE_42_length_87212_cov_19.426655|1|8	SRR11450579|k141_3421_flag=1_multi=110.0000_len=8612	Pisuviricota	GUT_GENOME011995	d__Bacteria;p__Spirochaetota;c__Spirochaetia;o__Treponematales;f__Treponemataceae;g__Treponema_D;s__	24	0	3.09e-05
GUT_GENOME170660|NODE_42_length_87212_cov_19.426655|1|8	SRR11648202|k141_322_flag=0_multi=521.7310_len=1955	Pisuviricota	GUT_GENOME011995	d__Bacteria;p__Spirochaetota;c__Spirochaetia;o__Treponematales;f__Treponemataceae;g__Treponema_D;s__	24	0	3.09e-05
GUT_GENOME170660|NODE_42_length_87212_cov_19.426655|1|8	SRR11829260|k141_2197_flag=1_multi=57.0000_len=4196	Kitrinoviricota	GUT_GENOME011995	d__Bacteria;p__Spirochaetota;c__Spirochaetia;o__Treponematales;f__Treponemataceae;g__Treponema_D;s__	24	0	3.09e-05
GUT_GENOME170660|NODE_42_length_87212_cov_19.426655|1|8	BC-0345724490|k141_9515	Duplornaviricota	GUT_GENOME011995	d__Bacteria;p__Spirochaetota;c__Spirochaetia;o__Treponematales;f__Treponemataceae;g__Treponema_D;s__	24	0	3.09e-05
GUT_GENOME170660|NODE_42_length_87212_cov_19.426655|1|8	SRR17481244|k141_434_flag=1_multi=161.0000_len=2746	Kitrinoviricota	GUT_GENOME011995	d__Bacteria;p__Spirochaetota;c__Spirochaetia;o__Treponematales;f__Treponemataceae;g__Treponema_D;s__	24	0	3.09e-05
GUT_GENOME170660|NODE_42_length_87212_cov_19.426655|1|8	BC-0345732070|k141_514	Pisuviricota	GUT_GENOME011995	d__Bacteria;p__Spirochaetota;c__Spirochaetia;o__Treponematales;f__Treponemataceae;g__Treponema_D;s__	24	0	3.09e-05
GUT_GENOME170660|NODE_42_length_87212_cov_19.426655|1|8	BC-0302417267|k141_472	Kitrinoviricota	GUT_GENOME011995	d__Bacteria;p__Spirochaetota;c__Spirochaetia;o__Treponematales;f__Treponemataceae;g__Treponema_D;s__	24	0	3.09e-05
GUT_GENOME170660|NODE_42_length_87212_cov_19.426655|1|8	SRR11648176|k141_60865_flag=1_multi=117.8157_len=8095	Pisuviricota	GUT_GENOME011995	d__Bacteria;p__Spirochaetota;c__Spirochaetia;o__Treponematales;f__Treponemataceae;g__Treponema_D;s__	24	0	3.09e-05
GUT_GENOME170660|NODE_42_length_87212_cov_19.426655|1|8	BC-0345732070|k141_514	Pisuviricota	GUT_GENOME011995	d__Bacteria;p__Spirochaetota;c__Spirochaetia;o__Treponematales;f__Treponemataceae;g__Treponema_D;s__	24	0	3.09e-05
GUT_GENOME170660|NODE_42_length_87212_cov_19.426655|1|8	SRR12686088|k141_14412_flag=1_multi=15.0000_len=5750	Pisuviricota	GUT_GENOME011995	d__Bacteria;p__Spirochaetota;c__Spirochaetia;o__Treponematales;f__Treponemataceae;g__Treponema_D;s__	24	0	3.09e-05
GUT_GENOME170660|NODE_42_length_87212_cov_19.426655|1|8	SRR11450580|k141_288389_flag=1_multi=108.0000_len=9065	Pisuviricota	GUT_GENOME011995	d__Bacteria;p__Spirochaetota;c__Spirochaetia;o__Treponematales;f__Treponemataceae;g__Treponema_D;s__	24	0	3.09e-05
GUT_GENOME170660|NODE_42_length_87212_cov_19.426655|1|8	SRR11648360|k141_187449_flag=1_multi=2812.0000_len=9848	Pisuviricota	GUT_GENOME011995	d__Bacteria;p__Spirochaetota;c__Spirochaetia;o__Treponematales;f__Treponemataceae;g__Treponema_D;s__	24	0	3.09e-05
GUT_GENOME170660|NODE_42_length_87212_cov_19.426655|1|8	SRR11648360|k141_187449_flag=1_multi=2812.0000_len=9848	Pisuviricota	GUT_GENOME011995	d__Bacteria;p__Spirochaetota;c__Spirochaetia;o__Treponematales;f__Treponemataceae;g__Treponema_D;s__	24	0	3.09e-05
GUT_GENOME170660|NODE_42_length_87212_cov_19.426655|1|8	BC-0345318769|k141_41055	Pisuviricota	GUT_GENOME011995	d__Bacteria;p__Spirochaetota;c__Spirochaetia;o__Treponematales;f__Treponemataceae;g__Treponema_D;s__	24	0	3.09e-05
GUT_GENOME170660|NODE_42_length_87212_cov_19.426655|1|8	SRR11450586|k141_213458_flag=1_multi=6442.8094_len=10045	Pisuviricota	GUT_GENOME011995	d__Bacteria;p__Spirochaetota;c__Spirochaetia;o__Treponematales;f__Treponemataceae;g__Treponema_D;s__	24	0	3.09e-05
GUT_GENOME170660|NODE_42_length_87212_cov_19.426655|1|8	SRR11450578|k141_2066_flag=1_multi=317.0000_len=8175	Pisuviricota	GUT_GENOME011995	d__Bacteria;p__Spirochaetota;c__Spirochaetia;o__Treponematales;f__Treponemataceae;g__Treponema_D;s__	24	0	3.09e-05
GUT_GENOME170660|NODE_42_length_87212_cov_19.426655|1|8	SRR11450578|k141_2066_flag=1_multi=317.0000_len=8175	Pisuviricota	GUT_GENOME011995	d__Bacteria;p__Spirochaetota;c__Spirochaetia;o__Treponematales;f__Treponemataceae;g__Treponema_D;s__	24	0	3.09e-05
GUT_GENOME170660|NODE_42_length_87212_cov_19.426655|1|8	SRR11450580|k141_1194_flag=1_multi=129.0000_len=9098	Pisuviricota	GUT_GENOME011995	d__Bacteria;p__Spirochaetota;c__Spirochaetia;o__Treponematales;f__Treponemataceae;g__Treponema_D;s__	24	0	3.09e-05
GUT_GENOME170660|NODE_42_length_87212_cov_19.426655|1|8	SRR11450579|k141_236588_flag=1_multi=105.0000_len=8198	Pisuviricota	GUT_GENOME011995	d__Bacteria;p__Spirochaetota;c__Spirochaetia;o__Treponematales;f__Treponemataceae;g__Treponema_D;s__	24	0	3.09e-05
GUT_GENOME170660|NODE_42_length_87212_cov_19.426655|1|8	BC-0302417267|k141_472	Kitrinoviricota	GUT_GENOME011995	d__Bacteria;p__Spirochaetota;c__Spirochaetia;o__Treponematales;f__Treponemataceae;g__Treponema_D;s__	24	0	3.09e-05
GUT_GENOME170660|NODE_42_length_87212_cov_19.426655|1|8	SRR11450578|k141_2066_flag=1_multi=317.0000_len=8175	Pisuviricota	GUT_GENOME011995	d__Bacteria;p__Spirochaetota;c__Spirochaetia;o__Treponematales;f__Treponemataceae;g__Treponema_D;s__	24	0	3.09e-05
GUT_GENOME170660|NODE_42_length_87212_cov_19.426655|1|8	SRR11563379|k141_984_flag=1_multi=10.0000_len=5356	Pisuviricota	GUT_GENOME011995	d__Bacteria;p__Spirochaetota;c__Spirochaetia;o__Treponematales;f__Treponemataceae;g__Treponema_D;s__	24	0	3.09e-05
GUT_GENOME170660|NODE_42_length_87212_cov_19.426655|1|8	SRR11648176|k141_60865_flag=1_multi=117.8157_len=8095	Pisuviricota	GUT_GENOME011995	d__Bacteria;p__Spirochaetota;c__Spirochaetia;o__Treponematales;f__Treponemataceae;g__Treponema_D;s__	24	0	3.09e-05
GUT_GENOME170660|NODE_42_length_87212_cov_19.426655|1|8	SRR11648176|k141_60865_flag=1_multi=117.8157_len=8095	Pisuviricota	GUT_GENOME011995	d__Bacteria;p__Spirochaetota;c__Spirochaetia;o__Treponematales;f__Treponemataceae;g__Treponema_D;s__	24	0	3.09e-05
GUT_GENOME170660|NODE_42_length_87212_cov_19.426655|1|8	BC-0345317873|k141_88724	Pisuviricota	GUT_GENOME011995	d__Bacteria;p__Spirochaetota;c__Spirochaetia;o__Treponematales;f__Treponemataceae;g__Treponema_D;s__	24	0	3.09e-05
GUT_GENOME170660|NODE_42_length_87212_cov_19.426655|1|8	SRR11450577|k141_1033_flag=1_multi=59.9742_len=2428	Pisuviricota	GUT_GENOME011995	d__Bacteria;p__Spirochaetota;c__Spirochaetia;o__Treponematales;f__Treponemataceae;g__Treponema_D;s__	24	0	3.09e-05
GUT_GENOME170660|NODE_42_length_87212_cov_19.426655|1|8	SRR11450578|k141_2066_flag=1_multi=317.0000_len=8175	Pisuviricota	GUT_GENOME011995	d__Bacteria;p__Spirochaetota;c__Spirochaetia;o__Treponematales;f__Treponemataceae;g__Treponema_D;s__	24	0	3.09e-05
GUT_GENOME170660|NODE_42_length_87212_cov_19.426655|1|8	SRR11648176|k141_60865_flag=1_multi=117.8157_len=8095	Pisuviricota	GUT_GENOME011995	d__Bacteria;p__Spirochaetota;c__Spirochaetia;o__Treponematales;f__Treponemataceae;g__Treponema_D;s__	24	0	3.09e-05
GUT_GENOME170660|NODE_42_length_87212_cov_19.426655|1|8	SRR11648176|k141_60865_flag=1_multi=117.8157_len=8095	Pisuviricota	GUT_GENOME011995	d__Bacteria;p__Spirochaetota;c__Spirochaetia;o__Treponematales;f__Treponemataceae;g__Treponema_D;s__	24	0	3.09e-05
GUT_GENOME170660|NODE_42_length_87212_cov_19.426655|1|8	SRR5829926|k141_223325_flag=1_multi=36.0000_len=9335	Pisuviricota	GUT_GENOME011995	d__Bacteria;p__Spirochaetota;c__Spirochaetia;o__Treponematales;f__Treponemataceae;g__Treponema_D;s__	24	0	3.09e-05
GUT_GENOME170660|NODE_42_length_87212_cov_19.426655|1|8	BC-0345317873|k141_88724	Pisuviricota	GUT_GENOME011995	d__Bacteria;p__Spirochaetota;c__Spirochaetia;o__Treponematales;f__Treponemataceae;g__Treponema_D;s__	24	0	3.09e-05
GUT_GENOME170660|NODE_42_length_87212_cov_19.426655|1|8	SRR11450578|k141_2066_flag=1_multi=317.0000_len=8175	Pisuviricota	GUT_GENOME011995	d__Bacteria;p__Spirochaetota;c__Spirochaetia;o__Treponematales;f__Treponemataceae;g__Treponema_D;s__	24	0	3.09e-05
GUT_GENOME170660|NODE_42_length_87212_cov_19.426655|1|8	SRR11450578|k141_2066_flag=1_multi=317.0000_len=8175	Pisuviricota	GUT_GENOME011995	d__Bacteria;p__Spirochaetota;c__Spirochaetia;o__Treponematales;f__Treponemataceae;g__Treponema_D;s__	24	0	3.09e-05
GUT_GENOME170660|NODE_42_length_87212_cov_19.426655|1|8	SRR11648202|k141_322_flag=0_multi=521.7310_len=1955	Pisuviricota	GUT_GENOME011995	d__Bacteria;p__Spirochaetota;c__Spirochaetia;o__Treponematales;f__Treponemataceae;g__Treponema_D;s__	24	0	3.09e-05
GUT_GENOME170660|NODE_42_length_87212_cov_19.426655|1|8	BC-0345649514|k141_807	Pisuviricota	GUT_GENOME011995	d__Bacteria;p__Spirochaetota;c__Spirochaetia;o__Treponematales;f__Treponemataceae;g__Treponema_D;s__	24	0	3.09e-05
GUT_GENOME170660|NODE_42_length_87212_cov_19.426655|1|8	BC-0345318769|k141_41055	Pisuviricota	GUT_GENOME011995	d__Bacteria;p__Spirochaetota;c__Spirochaetia;o__Treponematales;f__Treponemataceae;g__Treponema_D;s__	24	0	3.09e-05
GUT_GENOME170660|NODE_42_length_87212_cov_19.426655|1|8	SRR10849374|k141_328568_flag=1_multi=20.0000_len=3015	Lenarviricota	GUT_GENOME011995	d__Bacteria;p__Spirochaetota;c__Spirochaetia;o__Treponematales;f__Treponemataceae;g__Treponema_D;s__	24	0	3.09e-05
GUT_GENOME170660|NODE_42_length_87212_cov_19.426655|1|8	SRR11450579|k141_236588_flag=1_multi=105.0000_len=8198	Pisuviricota	GUT_GENOME011995	d__Bacteria;p__Spirochaetota;c__Spirochaetia;o__Treponematales;f__Treponemataceae;g__Treponema_D;s__	24	0	3.09e-05
GUT_GENOME170660|NODE_42_length_87212_cov_19.426655|1|8	SRR17481244|k141_434_flag=1_multi=161.0000_len=2746	Kitrinoviricota	GUT_GENOME011995	d__Bacteria;p__Spirochaetota;c__Spirochaetia;o__Treponematales;f__Treponemataceae;g__Treponema_D;s__	24	0	3.09e-05
GUT_GENOME170660|NODE_42_length_87212_cov_19.426655|1|8	SRR11450579|k141_6472_flag=1_multi=27.0000_len=10411	Kitrinoviricota	GUT_GENOME011995	d__Bacteria;p__Spirochaetota;c__Spirochaetia;o__Treponematales;f__Treponemataceae;g__Treponema_D;s__	24	0	3.09e-05
GUT_GENOME170660|NODE_42_length_87212_cov_19.426655|1|8	SRR11450580|k141_1194_flag=1_multi=129.0000_len=9098	Pisuviricota	GUT_GENOME011995	d__Bacteria;p__Spirochaetota;c__Spirochaetia;o__Treponematales;f__Treponemataceae;g__Treponema_D;s__	24	0	3.09e-05
GUT_GENOME170660|NODE_42_length_87212_cov_19.426655|1|8	BC-0345649514|k141_807	Pisuviricota	GUT_GENOME011995	d__Bacteria;p__Spirochaetota;c__Spirochaetia;o__Treponematales;f__Treponemataceae;g__Treponema_D;s__	24	0	3.09e-05
GUT_GENOME170660|NODE_42_length_87212_cov_19.426655|1|8	SRR11450578|k141_2066_flag=1_multi=317.0000_len=8175	Pisuviricota	GUT_GENOME011995	d__Bacteria;p__Spirochaetota;c__Spirochaetia;o__Treponematales;f__Treponemataceae;g__Treponema_D;s__	24	0	3.09e-05
GUT_GENOME170660|NODE_42_length_87212_cov_19.426655|1|8	SRR11450579|k141_236588_flag=1_multi=105.0000_len=8198	Pisuviricota	GUT_GENOME011995	d__Bacteria;p__Spirochaetota;c__Spirochaetia;o__Treponematales;f__Treponemataceae;g__Treponema_D;s__	24	0	3.09e-05
GUT_GENOME170660|NODE_42_length_87212_cov_19.426655|1|8	BC-0345724490|k141_9515	Duplornaviricota	GUT_GENOME011995	d__Bacteria;p__Spirochaetota;c__Spirochaetia;o__Treponematales;f__Treponemataceae;g__Treponema_D;s__	24	0	3.09e-05
GUT_GENOME170660|NODE_42_length_87212_cov_19.426655|1|8	BC-0345724490|k141_9515	Duplornaviricota	GUT_GENOME011995	d__Bacteria;p__Spirochaetota;c__Spirochaetia;o__Treponematales;f__Treponemataceae;g__Treponema_D;s__	24	0	3.09e-05
GUT_GENOME170660|NODE_42_length_87212_cov_19.426655|1|8	SRR11450579|k141_236588_flag=1_multi=105.0000_len=8198	Pisuviricota	GUT_GENOME011995	d__Bacteria;p__Spirochaetota;c__Spirochaetia;o__Treponematales;f__Treponemataceae;g__Treponema_D;s__	24	0	3.09e-05
GUT_GENOME170660|NODE_42_length_87212_cov_19.426655|1|8	BC-0345649514|k141_807	Pisuviricota	GUT_GENOME011995	d__Bacteria;p__Spirochaetota;c__Spirochaetia;o__Treponematales;f__Treponemataceae;g__Treponema_D;s__	24	0	3.09e-05
GUT_GENOME170660|NODE_42_length_87212_cov_19.426655|1|8	SRR11563379|k141_984_flag=1_multi=10.0000_len=5356	Pisuviricota	GUT_GENOME011995	d__Bacteria;p__Spirochaetota;c__Spirochaetia;o__Treponematales;f__Treponemataceae;g__Treponema_D;s__	24	0	3.09e-05
GUT_GENOME170660|NODE_42_length_87212_cov_19.426655|1|8	SRR11450577|k141_1033_flag=1_multi=59.9742_len=2428	Pisuviricota	GUT_GENOME011995	d__Bacteria;p__Spirochaetota;c__Spirochaetia;o__Treponematales;f__Treponemataceae;g__Treponema_D;s__	24	0	3.09e-05
GUT_GENOME170660|NODE_42_length_87212_cov_19.426655|1|8	SRR11450579|k141_17049_flag=1_multi=4764.0000_len=8934	Pisuviricota	GUT_GENOME011995	d__Bacteria;p__Spirochaetota;c__Spirochaetia;o__Treponematales;f__Treponemataceae;g__Treponema_D;s__	24	0	3.09e-05
GUT_GENOME170660|NODE_42_length_87212_cov_19.426655|1|8	SRR11450578|k141_2066_flag=1_multi=317.0000_len=8175	Pisuviricota	GUT_GENOME011995	d__Bacteria;p__Spirochaetota;c__Spirochaetia;o__Treponematales;f__Treponemataceae;g__Treponema_D;s__	24	0	3.09e-05
GUT_GENOME170660|NODE_42_length_87212_cov_19.426655|1|8	SRR11648360|k141_187449_flag=1_multi=2812.0000_len=9848	Pisuviricota	GUT_GENOME011995	d__Bacteria;p__Spirochaetota;c__Spirochaetia;o__Treponematales;f__Treponemataceae;g__Treponema_D;s__	24	0	3.09e-05
GUT_GENOME170660|NODE_42_length_87212_cov_19.426655|1|8	SRR10849374|k141_328568_flag=1_multi=20.0000_len=3015	Lenarviricota	GUT_GENOME011995	d__Bacteria;p__Spirochaetota;c__Spirochaetia;o__Treponematales;f__Treponemataceae;g__Treponema_D;s__	24	0	3.09e-05
GUT_GENOME170660|NODE_42_length_87212_cov_19.426655|1|8	SRR11450578|k141_2066_flag=1_multi=317.0000_len=8175	Pisuviricota	GUT_GENOME011995	d__Bacteria;p__Spirochaetota;c__Spirochaetia;o__Treponematales;f__Treponemataceae;g__Treponema_D;s__	24	0	3.09e-05
GUT_GENOME170660|NODE_42_length_87212_cov_19.426655|1|8	SRR11450579|k141_76622_flag=1_multi=211.0000_len=8995	Pisuviricota	GUT_GENOME011995	d__Bacteria;p__Spirochaetota;c__Spirochaetia;o__Treponematales;f__Treponemataceae;g__Treponema_D;s__	24	0	3.09e-05
GUT_GENOME170660|NODE_42_length_87212_cov_19.426655|1|8	SRR11450580|k141_109913_flag=1_multi=102.0000_len=6558	Pisuviricota	GUT_GENOME011995	d__Bacteria;p__Spirochaetota;c__Spirochaetia;o__Treponematales;f__Treponemataceae;g__Treponema_D;s__	24	0	3.09e-05
GUT_GENOME170660|NODE_42_length_87212_cov_19.426655|1|8	SRR11563379|k141_984_flag=1_multi=10.0000_len=5356	Pisuviricota	GUT_GENOME011995	d__Bacteria;p__Spirochaetota;c__Spirochaetia;o__Treponematales;f__Treponemataceae;g__Treponema_D;s__	24	0	3.09e-05
GUT_GENOME170660|NODE_42_length_87212_cov_19.426655|1|8	BC-0345649514|k141_807	Pisuviricota	GUT_GENOME011995	d__Bacteria;p__Spirochaetota;c__Spirochaetia;o__Treponematales;f__Treponemataceae;g__Treponema_D;s__	24	0	3.09e-05
GUT_GENOME170660|NODE_42_length_87212_cov_19.426655|1|8	SRR11450577|k141_1033_flag=1_multi=59.9742_len=2428	Pisuviricota	GUT_GENOME011995	d__Bacteria;p__Spirochaetota;c__Spirochaetia;o__Treponematales;f__Treponemataceae;g__Treponema_D;s__	24	0	3.09e-05
GUT_GENOME170660|NODE_42_length_87212_cov_19.426655|1|8	SRR11450579|k141_17049_flag=1_multi=4764.0000_len=8934	Pisuviricota	GUT_GENOME011995	d__Bacteria;p__Spirochaetota;c__Spirochaetia;o__Treponematales;f__Treponemataceae;g__Treponema_D;s__	24	0	3.09e-05
GUT_GENOME170660|NODE_42_length_87212_cov_19.426655|1|8	BC-0345649514|k141_807	Pisuviricota	GUT_GENOME011995	d__Bacteria;p__Spirochaetota;c__Spirochaetia;o__Treponematales;f__Treponemataceae;g__Treponema_D;s__	24	0	3.09e-05
GUT_GENOME170660|NODE_42_length_87212_cov_19.426655|1|8	BC-0345649514|k141_807	Pisuviricota	GUT_GENOME011995	d__Bacteria;p__Spirochaetota;c__Spirochaetia;o__Treponematales;f__Treponemataceae;g__Treponema_D;s__	24	0	3.09e-05
GUT_GENOME170660|NODE_42_length_87212_cov_19.426655|1|8	SRR11648176|k141_1576_flag=1_multi=88.2328_len=8707	Pisuviricota	GUT_GENOME011995	d__Bacteria;p__Spirochaetota;c__Spirochaetia;o__Treponematales;f__Treponemataceae;g__Treponema_D;s__	24	0	3.09e-05
GUT_GENOME170660|NODE_42_length_87212_cov_19.426655|1|8	SRR11450579|k141_17049_flag=1_multi=4764.0000_len=8934	Pisuviricota	GUT_GENOME011995	d__Bacteria;p__Spirochaetota;c__Spirochaetia;o__Treponematales;f__Treponemataceae;g__Treponema_D;s__	24	0	3.09e-05
GUT_GENOME170660|NODE_42_length_87212_cov_19.426655|1|8	SRR11829143|k141_119731_flag=1_multi=545.5096_len=9090	Pisuviricota	GUT_GENOME011995	d__Bacteria;p__Spirochaetota;c__Spirochaetia;o__Treponematales;f__Treponemataceae;g__Treponema_D;s__	24	0	3.09e-05
GUT_GENOME170660|NODE_42_length_87212_cov_19.426655|1|8	SRR11450579|k141_236588_flag=1_multi=105.0000_len=8198	Pisuviricota	GUT_GENOME011995	d__Bacteria;p__Spirochaetota;c__Spirochaetia;o__Treponematales;f__Treponemataceae;g__Treponema_D;s__	24	0	3.09e-05
GUT_GENOME170660|NODE_42_length_87212_cov_19.426655|1|8	BC-0345649514|k141_807	Pisuviricota	GUT_GENOME011995	d__Bacteria;p__Spirochaetota;c__Spirochaetia;o__Treponematales;f__Treponemataceae;g__Treponema_D;s__	24	0	3.09e-05
GUT_GENOME170660|NODE_42_length_87212_cov_19.426655|1|8	BC-0302413540|k141_158	Kitrinoviricota	GUT_GENOME011995	d__Bacteria;p__Spirochaetota;c__Spirochaetia;o__Treponematales;f__Treponemataceae;g__Treponema_D;s__	24	0	3.09e-05
GUT_GENOME170660|NODE_42_length_87212_cov_19.426655|1|8	BC-0345318769|k141_41055	Pisuviricota	GUT_GENOME011995	d__Bacteria;p__Spirochaetota;c__Spirochaetia;o__Treponematales;f__Treponemataceae;g__Treponema_D;s__	24	0	3.09e-05
GUT_GENOME170660|NODE_42_length_87212_cov_19.426655|1|8	SRR11648360|k141_238775_flag=1_multi=340.0000_len=9219	Pisuviricota	GUT_GENOME011995	d__Bacteria;p__Spirochaetota;c__Spirochaetia;o__Treponematales;f__Treponemataceae;g__Treponema_D;s__	24	0	3.09e-05
GUT_GENOME170660|NODE_42_length_87212_cov_19.426655|1|8	SRR11450579|k141_76622_flag=1_multi=211.0000_len=8995	Pisuviricota	GUT_GENOME011995	d__Bacteria;p__Spirochaetota;c__Spirochaetia;o__Treponematales;f__Treponemataceae;g__Treponema_D;s__	24	0	3.09e-05
GUT_GENOME170660|NODE_42_length_87212_cov_19.426655|1|8	BC-0302413540|k141_158	Kitrinoviricota	GUT_GENOME011995	d__Bacteria;p__Spirochaetota;c__Spirochaetia;o__Treponematales;f__Treponemataceae;g__Treponema_D;s__	24	0	3.09e-05
GUT_GENOME170660|NODE_42_length_87212_cov_19.426655|1|8	SRR11450579|k141_76622_flag=1_multi=211.0000_len=8995	Pisuviricota	GUT_GENOME011995	d__Bacteria;p__Spirochaetota;c__Spirochaetia;o__Treponematales;f__Treponemataceae;g__Treponema_D;s__	24	0	3.09e-05
GUT_GENOME170660|NODE_42_length_87212_cov_19.426655|1|8	SRR11648176|k141_60865_flag=1_multi=117.8157_len=8095	Pisuviricota	GUT_GENOME011995	d__Bacteria;p__Spirochaetota;c__Spirochaetia;o__Treponematales;f__Treponemataceae;g__Treponema_D;s__	24	0	3.09e-05
GUT_GENOME170660|NODE_42_length_87212_cov_19.426655|1|8	SRR11563379|k141_984_flag=1_multi=10.0000_len=5356	Pisuviricota	GUT_GENOME011995	d__Bacteria;p__Spirochaetota;c__Spirochaetia;o__Treponematales;f__Treponemataceae;g__Treponema_D;s__	24	0	3.09e-05
GUT_GENOME170660|NODE_42_length_87212_cov_19.426655|1|8	BC-0302413540|k141_158	Kitrinoviricota	GUT_GENOME011995	d__Bacteria;p__Spirochaetota;c__Spirochaetia;o__Treponematales;f__Treponemataceae;g__Treponema_D;s__	24	0	3.09e-05
GUT_GENOME170660|NODE_42_length_87212_cov_19.426655|1|8	BC-0302413540|k141_158	Kitrinoviricota	GUT_GENOME011995	d__Bacteria;p__Spirochaetota;c__Spirochaetia;o__Treponematales;f__Treponemataceae;g__Treponema_D;s__	24	0	3.09e-05
GUT_GENOME170660|NODE_42_length_87212_cov_19.426655|1|8	SRR11648176|k141_60865_flag=1_multi=117.8157_len=8095	Pisuviricota	GUT_GENOME011995	d__Bacteria;p__Spirochaetota;c__Spirochaetia;o__Treponematales;f__Treponemataceae;g__Treponema_D;s__	24	0	3.09e-05
GUT_GENOME170660|NODE_42_length_87212_cov_19.426655|1|8	BC-0345318769|k141_41055	Pisuviricota	GUT_GENOME011995	d__Bacteria;p__Spirochaetota;c__Spirochaetia;o__Treponematales;f__Treponemataceae;g__Treponema_D;s__	24	0	3.09e-05
GUT_GENOME170660|NODE_42_length_87212_cov_19.426655|1|8	BC-0345698157|k141_28560	Pisuviricota	GUT_GENOME011995	d__Bacteria;p__Spirochaetota;c__Spirochaetia;o__Treponematales;f__Treponemataceae;g__Treponema_D;s__	24	0	3.09e-05
GUT_GENOME170660|NODE_42_length_87212_cov_19.426655|1|8	SRR11450579|k141_17049_flag=1_multi=4764.0000_len=8934	Pisuviricota	GUT_GENOME011995	d__Bacteria;p__Spirochaetota;c__Spirochaetia;o__Treponematales;f__Treponemataceae;g__Treponema_D;s__	24	0	3.09e-05
GUT_GENOME170660|NODE_42_length_87212_cov_19.426655|1|8	BC-0345724490|k141_9515	Duplornaviricota	GUT_GENOME011995	d__Bacteria;p__Spirochaetota;c__Spirochaetia;o__Treponematales;f__Treponemataceae;g__Treponema_D;s__	24	0	3.09e-05
GUT_GENOME170660|NODE_42_length_87212_cov_19.426655|1|8	SRR11648360|k141_2427_flag=0_multi=550.5579_len=8547	Pisuviricota	GUT_GENOME011995	d__Bacteria;p__Spirochaetota;c__Spirochaetia;o__Treponematales;f__Treponemataceae;g__Treponema_D;s__	24	0	3.09e-05
GUT_GENOME170660|NODE_42_length_87212_cov_19.426655|1|8	SRR11450579|k141_17049_flag=1_multi=4764.0000_len=8934	Pisuviricota	GUT_GENOME011995	d__Bacteria;p__Spirochaetota;c__Spirochaetia;o__Treponematales;f__Treponemataceae;g__Treponema_D;s__	24	0	3.09e-05
GUT_GENOME170660|NODE_42_length_87212_cov_19.426655|1|8	BC-0302413540|k141_158	Kitrinoviricota	GUT_GENOME011995	d__Bacteria;p__Spirochaetota;c__Spirochaetia;o__Treponematales;f__Treponemataceae;g__Treponema_D;s__	24	0	3.09e-05
GUT_GENOME170660|NODE_42_length_87212_cov_19.426655|1|8	BC-0302413540|k141_158	Kitrinoviricota	GUT_GENOME011995	d__Bacteria;p__Spirochaetota;c__Spirochaetia;o__Treponematales;f__Treponemataceae;g__Treponema_D;s__	24	0	3.09e-05
GUT_GENOME170660|NODE_42_length_87212_cov_19.426655|1|8	SRR10904365|k141_287437_flag=1_multi=32.0000_len=4454	Kitrinoviricota	GUT_GENOME011995	d__Bacteria;p__Spirochaetota;c__Spirochaetia;o__Treponematales;f__Treponemataceae;g__Treponema_D;s__	24	0	3.09e-05
GUT_GENOME170660|NODE_42_length_87212_cov_19.426655|1|8	BC-0345318769|k141_41055	Pisuviricota	GUT_GENOME011995	d__Bacteria;p__Spirochaetota;c__Spirochaetia;o__Treponematales;f__Treponemataceae;g__Treponema_D;s__	24	0	3.09e-05
GUT_GENOME170660|NODE_42_length_87212_cov_19.426655|1|8	BC-0345724490|k141_9515	Duplornaviricota	GUT_GENOME011995	d__Bacteria;p__Spirochaetota;c__Spirochaetia;o__Treponematales;f__Treponemataceae;g__Treponema_D;s__	24	0	3.09e-05
GUT_GENOME170660|NODE_42_length_87212_cov_19.426655|1|8	SRR11450577|k141_1033_flag=1_multi=59.9742_len=2428	Pisuviricota	GUT_GENOME011995	d__Bacteria;p__Spirochaetota;c__Spirochaetia;o__Treponematales;f__Treponemataceae;g__Treponema_D;s__	24	0	3.09e-05
GUT_GENOME170660|NODE_42_length_87212_cov_19.426655|1|8	SRR11649087|k141_77109_flag=1_multi=287.0000_len=9144	Pisuviricota	GUT_GENOME011995	d__Bacteria;p__Spirochaetota;c__Spirochaetia;o__Treponematales;f__Treponemataceae;g__Treponema_D;s__	24	0	3.09e-05
GUT_GENOME170660|NODE_42_length_87212_cov_19.426655|1|8	SRR11648360|k141_187449_flag=1_multi=2812.0000_len=9848	Pisuviricota	GUT_GENOME011995	d__Bacteria;p__Spirochaetota;c__Spirochaetia;o__Treponematales;f__Treponemataceae;g__Treponema_D;s__	24	0	3.09e-05
GUT_GENOME170660|NODE_42_length_87212_cov_19.426655|1|8	SRR5829926|k141_223325_flag=1_multi=36.0000_len=9335	Pisuviricota	GUT_GENOME011995	d__Bacteria;p__Spirochaetota;c__Spirochaetia;o__Treponematales;f__Treponemataceae;g__Treponema_D;s__	24	0	3.09e-05
GUT_GENOME170660|NODE_42_length_87212_cov_19.426655|1|8	BC-0345318769|k141_41055	Pisuviricota	GUT_GENOME011995	d__Bacteria;p__Spirochaetota;c__Spirochaetia;o__Treponematales;f__Treponemataceae;g__Treponema_D;s__	24	0	3.09e-05
GUT_GENOME170660|NODE_42_length_87212_cov_19.426655|1|8	BC-0332571705|k141_1013	Kitrinoviricota	GUT_GENOME011995	d__Bacteria;p__Spirochaetota;c__Spirochaetia;o__Treponematales;f__Treponemataceae;g__Treponema_D;s__	24	0	3.09e-05
GUT_GENOME170660|NODE_42_length_87212_cov_19.426655|1|8	SRR11450579|k141_236588_flag=1_multi=105.0000_len=8198	Pisuviricota	GUT_GENOME011995	d__Bacteria;p__Spirochaetota;c__Spirochaetia;o__Treponematales;f__Treponemataceae;g__Treponema_D;s__	24	0	3.09e-05
GUT_GENOME170660|NODE_42_length_87212_cov_19.426655|1|8	SRR11450579|k141_236588_flag=1_multi=105.0000_len=8198	Pisuviricota	GUT_GENOME011995	d__Bacteria;p__Spirochaetota;c__Spirochaetia;o__Treponematales;f__Treponemataceae;g__Treponema_D;s__	24	0	3.09e-05
GUT_GENOME170660|NODE_42_length_87212_cov_19.426655|1|8	SRR11450579|k141_17049_flag=1_multi=4764.0000_len=8934	Pisuviricota	GUT_GENOME011995	d__Bacteria;p__Spirochaetota;c__Spirochaetia;o__Treponematales;f__Treponemataceae;g__Treponema_D;s__	24	0	3.09e-05
GUT_GENOME170660|NODE_42_length_87212_cov_19.426655|1|8	SRR11450579|k141_236588_flag=1_multi=105.0000_len=8198	Pisuviricota	GUT_GENOME011995	d__Bacteria;p__Spirochaetota;c__Spirochaetia;o__Treponematales;f__Treponemataceae;g__Treponema_D;s__	24	0	3.09e-05
GUT_GENOME170660|NODE_42_length_87212_cov_19.426655|1|8	SRR11648360|k141_238775_flag=1_multi=340.0000_len=9219	Pisuviricota	GUT_GENOME011995	d__Bacteria;p__Spirochaetota;c__Spirochaetia;o__Treponematales;f__Treponemataceae;g__Treponema_D;s__	24	0	3.09e-05
GUT_GENOME170660|NODE_42_length_87212_cov_19.426655|1|8	SRR11648176|k141_60865_flag=1_multi=117.8157_len=8095	Pisuviricota	GUT_GENOME011995	d__Bacteria;p__Spirochaetota;c__Spirochaetia;o__Treponematales;f__Treponemataceae;g__Treponema_D;s__	24	0	3.09e-05
GUT_GENOME170660|NODE_42_length_87212_cov_19.426655|1|8	SRR11648360|k141_187449_flag=1_multi=2812.0000_len=9848	Pisuviricota	GUT_GENOME011995	d__Bacteria;p__Spirochaetota;c__Spirochaetia;o__Treponematales;f__Treponemataceae;g__Treponema_D;s__	24	0	3.09e-05
GUT_GENOME170660|NODE_42_length_87212_cov_19.426655|1|8	SRR11648202|k141_322_flag=0_multi=521.7310_len=1955	Pisuviricota	GUT_GENOME011995	d__Bacteria;p__Spirochaetota;c__Spirochaetia;o__Treponematales;f__Treponemataceae;g__Treponema_D;s__	24	0	3.09e-05
GUT_GENOME170660|NODE_42_length_87212_cov_19.426655|1|8	SRR10904365|k141_287437_flag=1_multi=32.0000_len=4454	Kitrinoviricota	GUT_GENOME011995	d__Bacteria;p__Spirochaetota;c__Spirochaetia;o__Treponematales;f__Treponemataceae;g__Treponema_D;s__	24	0	3.09e-05
GUT_GENOME170660|NODE_42_length_87212_cov_19.426655|1|8	BC-0345649514|k141_807	Pisuviricota	GUT_GENOME011995	d__Bacteria;p__Spirochaetota;c__Spirochaetia;o__Treponematales;f__Treponemataceae;g__Treponema_D;s__	24	0	3.09e-05
GUT_GENOME170660|NODE_42_length_87212_cov_19.426655|1|8	SRR11450580|k141_1194_flag=1_multi=129.0000_len=9098	Pisuviricota	GUT_GENOME011995	d__Bacteria;p__Spirochaetota;c__Spirochaetia;o__Treponematales;f__Treponemataceae;g__Treponema_D;s__	24	0	3.09e-05
GUT_GENOME170660|NODE_42_length_87212_cov_19.426655|1|8	SRR11648202|k141_322_flag=0_multi=521.7310_len=1955	Pisuviricota	GUT_GENOME011995	d__Bacteria;p__Spirochaetota;c__Spirochaetia;o__Treponematales;f__Treponemataceae;g__Treponema_D;s__	24	0	3.09e-05
GUT_GENOME170660|NODE_42_length_87212_cov_19.426655|1|8	SRR11648176|k141_60865_flag=1_multi=117.8157_len=8095	Pisuviricota	GUT_GENOME011995	d__Bacteria;p__Spirochaetota;c__Spirochaetia;o__Treponematales;f__Treponemataceae;g__Treponema_D;s__	24	0	3.09e-05
GUT_GENOME170660|NODE_42_length_87212_cov_19.426655|1|8	SRR10849374|k141_328568_flag=1_multi=20.0000_len=3015	Lenarviricota	GUT_GENOME011995	d__Bacteria;p__Spirochaetota;c__Spirochaetia;o__Treponematales;f__Treponemataceae;g__Treponema_D;s__	24	0	3.09e-05
GUT_GENOME170660|NODE_42_length_87212_cov_19.426655|1|8	BC-0345649514|k141_807	Pisuviricota	GUT_GENOME011995	d__Bacteria;p__Spirochaetota;c__Spirochaetia;o__Treponematales;f__Treponemataceae;g__Treponema_D;s__	24	0	3.09e-05
GUT_GENOME170660|NODE_42_length_87212_cov_19.426655|1|8	SRR11450586|k141_213458_flag=1_multi=6442.8094_len=10045	Pisuviricota	GUT_GENOME011995	d__Bacteria;p__Spirochaetota;c__Spirochaetia;o__Treponematales;f__Treponemataceae;g__Treponema_D;s__	24	0	3.09e-05
GUT_GENOME170660|NODE_42_length_87212_cov_19.426655|1|8	SRR11648176|k141_60865_flag=1_multi=117.8157_len=8095	Pisuviricota	GUT_GENOME011995	d__Bacteria;p__Spirochaetota;c__Spirochaetia;o__Treponematales;f__Treponemataceae;g__Treponema_D;s__	24	0	3.09e-05
GUT_GENOME170660|NODE_42_length_87212_cov_19.426655|1|8	SRR11648360|k141_2427_flag=0_multi=550.5579_len=8547	Pisuviricota	GUT_GENOME011995	d__Bacteria;p__Spirochaetota;c__Spirochaetia;o__Treponematales;f__Treponemataceae;g__Treponema_D;s__	24	0	3.09e-05
GUT_GENOME170660|NODE_42_length_87212_cov_19.426655|1|8	BC-0345649514|k141_807	Pisuviricota	GUT_GENOME011995	d__Bacteria;p__Spirochaetota;c__Spirochaetia;o__Treponematales;f__Treponemataceae;g__Treponema_D;s__	24	0	3.09e-05
GUT_GENOME170660|NODE_42_length_87212_cov_19.426655|1|8	BC-0345318769|k141_41055	Pisuviricota	GUT_GENOME011995	d__Bacteria;p__Spirochaetota;c__Spirochaetia;o__Treponematales;f__Treponemataceae;g__Treponema_D;s__	24	0	3.09e-05
GUT_GENOME170660|NODE_42_length_87212_cov_19.426655|1|8	SRR11648360|k141_2427_flag=0_multi=550.5579_len=8547	Pisuviricota	GUT_GENOME011995	d__Bacteria;p__Spirochaetota;c__Spirochaetia;o__Treponematales;f__Treponemataceae;g__Treponema_D;s__	24	0	3.09e-05
GUT_GENOME170660|NODE_42_length_87212_cov_19.426655|1|8	BC-0345649514|k141_807	Pisuviricota	GUT_GENOME011995	d__Bacteria;p__Spirochaetota;c__Spirochaetia;o__Treponematales;f__Treponemataceae;g__Treponema_D;s__	24	0	3.09e-05
GUT_GENOME170660|NODE_42_length_87212_cov_19.426655|1|8	SRR11648360|k141_187449_flag=1_multi=2812.0000_len=9848	Pisuviricota	GUT_GENOME011995	d__Bacteria;p__Spirochaetota;c__Spirochaetia;o__Treponematales;f__Treponemataceae;g__Treponema_D;s__	24	0	3.09e-05
GUT_GENOME170660|NODE_42_length_87212_cov_19.426655|1|8	SRR11450579|k141_17049_flag=1_multi=4764.0000_len=8934	Pisuviricota	GUT_GENOME011995	d__Bacteria;p__Spirochaetota;c__Spirochaetia;o__Treponematales;f__Treponemataceae;g__Treponema_D;s__	24	0	3.09e-05
GUT_GENOME170660|NODE_42_length_87212_cov_19.426655|1|8	SRR11648202|k141_322_flag=0_multi=521.7310_len=1955	Pisuviricota	GUT_GENOME011995	d__Bacteria;p__Spirochaetota;c__Spirochaetia;o__Treponematales;f__Treponemataceae;g__Treponema_D;s__	24	0	3.09e-05
GUT_GENOME170660|NODE_42_length_87212_cov_19.426655|1|8	SRR11563379|k141_984_flag=1_multi=10.0000_len=5356	Pisuviricota	GUT_GENOME011995	d__Bacteria;p__Spirochaetota;c__Spirochaetia;o__Treponematales;f__Treponemataceae;g__Treponema_D;s__	24	0	3.09e-05
GUT_GENOME170660|NODE_42_length_87212_cov_19.426655|1|8	BC-0345732070|k141_514	Pisuviricota	GUT_GENOME011995	d__Bacteria;p__Spirochaetota;c__Spirochaetia;o__Treponematales;f__Treponemataceae;g__Treponema_D;s__	24	0	3.09e-05
GUT_GENOME170660|NODE_42_length_87212_cov_19.426655|1|8	SRR11450579|k141_236588_flag=1_multi=105.0000_len=8198	Pisuviricota	GUT_GENOME011995	d__Bacteria;p__Spirochaetota;c__Spirochaetia;o__Treponematales;f__Treponemataceae;g__Treponema_D;s__	24	0	3.09e-05
GUT_GENOME170660|NODE_42_length_87212_cov_19.426655|1|8	SRR11648360|k141_2427_flag=0_multi=550.5579_len=8547	Pisuviricota	GUT_GENOME011995	d__Bacteria;p__Spirochaetota;c__Spirochaetia;o__Treponematales;f__Treponemataceae;g__Treponema_D;s__	24	0	3.09e-05
GUT_GENOME170660|NODE_42_length_87212_cov_19.426655|1|8	SRR18771403|k141_131354_flag=1_multi=48.8407_len=10690	Pisuviricota	GUT_GENOME011995	d__Bacteria;p__Spirochaetota;c__Spirochaetia;o__Treponematales;f__Treponemataceae;g__Treponema_D;s__	24	0	3.09e-05
GUT_GENOME170660|NODE_42_length_87212_cov_19.426655|1|8	SRR18771403|k141_131354_flag=1_multi=48.8407_len=10690	Pisuviricota	GUT_GENOME011995	d__Bacteria;p__Spirochaetota;c__Spirochaetia;o__Treponematales;f__Treponemataceae;g__Treponema_D;s__	24	0	3.09e-05
GUT_GENOME170660|NODE_42_length_87212_cov_19.426655|1|8	SRR5829926|k141_223325_flag=1_multi=36.0000_len=9335	Pisuviricota	GUT_GENOME011995	d__Bacteria;p__Spirochaetota;c__Spirochaetia;o__Treponematales;f__Treponemataceae;g__Treponema_D;s__	24	0	3.09e-05
GUT_GENOME170660|NODE_42_length_87212_cov_19.426655|1|8	SRR11648360|k141_187449_flag=1_multi=2812.0000_len=9848	Pisuviricota	GUT_GENOME011995	d__Bacteria;p__Spirochaetota;c__Spirochaetia;o__Treponematales;f__Treponemataceae;g__Treponema_D;s__	24	0	3.09e-05
GUT_GENOME170660|NODE_42_length_87212_cov_19.426655|1|8	BC-0345318769|k141_41055	Pisuviricota	GUT_GENOME011995	d__Bacteria;p__Spirochaetota;c__Spirochaetia;o__Treponematales;f__Treponemataceae;g__Treponema_D;s__	24	0	3.09e-05
GUT_GENOME170660|NODE_42_length_87212_cov_19.426655|1|8	SRR11648176|k141_60865_flag=1_multi=117.8157_len=8095	Pisuviricota	GUT_GENOME011995	d__Bacteria;p__Spirochaetota;c__Spirochaetia;o__Treponematales;f__Treponemataceae;g__Treponema_D;s__	24	0	3.09e-05
GUT_GENOME170660|NODE_42_length_87212_cov_19.426655|1|8	SRR11648360|k141_187449_flag=1_multi=2812.0000_len=9848	Pisuviricota	GUT_GENOME011995	d__Bacteria;p__Spirochaetota;c__Spirochaetia;o__Treponematales;f__Treponemataceae;g__Treponema_D;s__	24	0	3.09e-05
GUT_GENOME170660|NODE_42_length_87212_cov_19.426655|1|8	BC-0345649514|k141_807	Pisuviricota	GUT_GENOME011995	d__Bacteria;p__Spirochaetota;c__Spirochaetia;o__Treponematales;f__Treponemataceae;g__Treponema_D;s__	24	0	3.09e-05
GUT_GENOME170660|NODE_42_length_87212_cov_19.426655|1|8	SRR11648176|k141_60865_flag=1_multi=117.8157_len=8095	Pisuviricota	GUT_GENOME011995	d__Bacteria;p__Spirochaetota;c__Spirochaetia;o__Treponematales;f__Treponemataceae;g__Treponema_D;s__	24	0	3.09e-05
GUT_GENOME170660|NODE_42_length_87212_cov_19.426655|1|8	BC-0345732070|k141_514	Pisuviricota	GUT_GENOME011995	d__Bacteria;p__Spirochaetota;c__Spirochaetia;o__Treponematales;f__Treponemataceae;g__Treponema_D;s__	24	0	3.09e-05
GUT_GENOME170660|NODE_42_length_87212_cov_19.426655|1|8	SRR11450586|k141_213458_flag=1_multi=6442.8094_len=10045	Pisuviricota	GUT_GENOME011995	d__Bacteria;p__Spirochaetota;c__Spirochaetia;o__Treponematales;f__Treponemataceae;g__Treponema_D;s__	24	0	3.09e-05
GUT_GENOME170660|NODE_42_length_87212_cov_19.426655|1|8	SRR11648202|k141_322_flag=0_multi=521.7310_len=1955	Pisuviricota	GUT_GENOME011995	d__Bacteria;p__Spirochaetota;c__Spirochaetia;o__Treponematales;f__Treponemataceae;g__Treponema_D;s__	24	0	3.09e-05
GUT_GENOME170660|NODE_42_length_87212_cov_19.426655|1|8	SRR11450579|k141_236588_flag=1_multi=105.0000_len=8198	Pisuviricota	GUT_GENOME011995	d__Bacteria;p__Spirochaetota;c__Spirochaetia;o__Treponematales;f__Treponemataceae;g__Treponema_D;s__	24	0	3.09e-05
GUT_GENOME170660|NODE_42_length_87212_cov_19.426655|1|8	SRR11648360|k141_187449_flag=1_multi=2812.0000_len=9848	Pisuviricota	GUT_GENOME011995	d__Bacteria;p__Spirochaetota;c__Spirochaetia;o__Treponematales;f__Treponemataceae;g__Treponema_D;s__	24	0	3.09e-05
GUT_GENOME170660|NODE_42_length_87212_cov_19.426655|1|8	BC-0345649514|k141_807	Pisuviricota	GUT_GENOME011995	d__Bacteria;p__Spirochaetota;c__Spirochaetia;o__Treponematales;f__Treponemataceae;g__Treponema_D;s__	24	0	3.09e-05
GUT_GENOME170660|NODE_42_length_87212_cov_19.426655|1|8	SRR11648360|k141_187449_flag=1_multi=2812.0000_len=9848	Pisuviricota	GUT_GENOME011995	d__Bacteria;p__Spirochaetota;c__Spirochaetia;o__Treponematales;f__Treponemataceae;g__Treponema_D;s__	24	0	3.09e-05
GUT_GENOME170660|NODE_42_length_87212_cov_19.426655|1|8	BC-0345724490|k141_9515	Duplornaviricota	GUT_GENOME011995	d__Bacteria;p__Spirochaetota;c__Spirochaetia;o__Treponematales;f__Treponemataceae;g__Treponema_D;s__	24	0	3.09e-05
GUT_GENOME170660|NODE_42_length_87212_cov_19.426655|1|8	SRR11648360|k141_187449_flag=1_multi=2812.0000_len=9848	Pisuviricota	GUT_GENOME011995	d__Bacteria;p__Spirochaetota;c__Spirochaetia;o__Treponematales;f__Treponemataceae;g__Treponema_D;s__	24	0	3.09e-05
GUT_GENOME170660|NODE_42_length_87212_cov_19.426655|1|8	SRR12686088|k141_14412_flag=1_multi=15.0000_len=5750	Pisuviricota	GUT_GENOME011995	d__Bacteria;p__Spirochaetota;c__Spirochaetia;o__Treponematales;f__Treponemataceae;g__Treponema_D;s__	24	0	3.09e-05
GUT_GENOME170660|NODE_42_length_87212_cov_19.426655|1|8	SRR11648360|k141_187449_flag=1_multi=2812.0000_len=9848	Pisuviricota	GUT_GENOME011995	d__Bacteria;p__Spirochaetota;c__Spirochaetia;o__Treponematales;f__Treponemataceae;g__Treponema_D;s__	24	0	3.09e-05
GUT_GENOME170660|NODE_42_length_87212_cov_19.426655|1|8	SRR11649087|k141_2929_flag=1_multi=251.0000_len=9689	Pisuviricota	GUT_GENOME011995	d__Bacteria;p__Spirochaetota;c__Spirochaetia;o__Treponematales;f__Treponemataceae;g__Treponema_D;s__	24	0	3.09e-05
GUT_GENOME170660|NODE_42_length_87212_cov_19.426655|1|8	BC-0345649514|k141_807	Pisuviricota	GUT_GENOME011995	d__Bacteria;p__Spirochaetota;c__Spirochaetia;o__Treponematales;f__Treponemataceae;g__Treponema_D;s__	24	0	3.09e-05
GUT_GENOME170660|NODE_42_length_87212_cov_19.426655|1|8	SRR11450586|k141_213458_flag=1_multi=6442.8094_len=10045	Pisuviricota	GUT_GENOME011995	d__Bacteria;p__Spirochaetota;c__Spirochaetia;o__Treponematales;f__Treponemataceae;g__Treponema_D;s__	24	0	3.09e-05
GUT_GENOME170660|NODE_42_length_87212_cov_19.426655|1|8	SRR11450579|k141_17049_flag=1_multi=4764.0000_len=8934	Pisuviricota	GUT_GENOME011995	d__Bacteria;p__Spirochaetota;c__Spirochaetia;o__Treponematales;f__Treponemataceae;g__Treponema_D;s__	24	0	3.09e-05
GUT_GENOME170660|NODE_42_length_87212_cov_19.426655|1|8	BC-0345649514|k141_807	Pisuviricota	GUT_GENOME011995	d__Bacteria;p__Spirochaetota;c__Spirochaetia;o__Treponematales;f__Treponemataceae;g__Treponema_D;s__	24	0	3.09e-05
GUT_GENOME170660|NODE_42_length_87212_cov_19.426655|1|8	SRR11829260|k141_2197_flag=1_multi=57.0000_len=4196	Kitrinoviricota	GUT_GENOME011995	d__Bacteria;p__Spirochaetota;c__Spirochaetia;o__Treponematales;f__Treponemataceae;g__Treponema_D;s__	24	0	3.09e-05
GUT_GENOME170660|NODE_42_length_87212_cov_19.426655|1|8	SRR11450579|k141_3421_flag=1_multi=110.0000_len=8612	Pisuviricota	GUT_GENOME011995	d__Bacteria;p__Spirochaetota;c__Spirochaetia;o__Treponematales;f__Treponemataceae;g__Treponema_D;s__	24	0	3.09e-05
GUT_GENOME170660|NODE_42_length_87212_cov_19.426655|1|8	SRR11647857|k141_256089_flag=1_multi=53.7354_len=5197	Kitrinoviricota	GUT_GENOME011995	d__Bacteria;p__Spirochaetota;c__Spirochaetia;o__Treponematales;f__Treponemataceae;g__Treponema_D;s__	24	0	3.09e-05
GUT_GENOME170660|NODE_42_length_87212_cov_19.426655|1|8	BC-0345649514|k141_807	Pisuviricota	GUT_GENOME011995	d__Bacteria;p__Spirochaetota;c__Spirochaetia;o__Treponematales;f__Treponemataceae;g__Treponema_D;s__	24	0	3.09e-05
GUT_GENOME170660|NODE_42_length_87212_cov_19.426655|1|8	SRR11450578|k141_2066_flag=1_multi=317.0000_len=8175	Pisuviricota	GUT_GENOME011995	d__Bacteria;p__Spirochaetota;c__Spirochaetia;o__Treponematales;f__Treponemataceae;g__Treponema_D;s__	24	0	3.09e-05
GUT_GENOME170660|NODE_42_length_87212_cov_19.426655|1|8	SRR11450586|k141_213458_flag=1_multi=6442.8094_len=10045	Pisuviricota	GUT_GENOME011995	d__Bacteria;p__Spirochaetota;c__Spirochaetia;o__Treponematales;f__Treponemataceae;g__Treponema_D;s__	24	0	3.09e-05
GUT_GENOME170660|NODE_42_length_87212_cov_19.426655|1|8	SRR11648176|k141_60865_flag=1_multi=117.8157_len=8095	Pisuviricota	GUT_GENOME011995	d__Bacteria;p__Spirochaetota;c__Spirochaetia;o__Treponematales;f__Treponemataceae;g__Treponema_D;s__	24	0	3.09e-05
GUT_GENOME170660|NODE_42_length_87212_cov_19.426655|1|8	BC-0345649514|k141_807	Pisuviricota	GUT_GENOME011995	d__Bacteria;p__Spirochaetota;c__Spirochaetia;o__Treponematales;f__Treponemataceae;g__Treponema_D;s__	24	0	3.09e-05
GUT_GENOME170660|NODE_42_length_87212_cov_19.426655|1|8	SRR11450579|k141_17049_flag=1_multi=4764.0000_len=8934	Pisuviricota	GUT_GENOME011995	d__Bacteria;p__Spirochaetota;c__Spirochaetia;o__Treponematales;f__Treponemataceae;g__Treponema_D;s__	24	0	3.09e-05
GUT_GENOME170660|NODE_42_length_87212_cov_19.426655|1|8	SRR11450579|k141_236588_flag=1_multi=105.0000_len=8198	Pisuviricota	GUT_GENOME011995	d__Bacteria;p__Spirochaetota;c__Spirochaetia;o__Treponematales;f__Treponemataceae;g__Treponema_D;s__	24	0	3.09e-05
GUT_GENOME170660|NODE_42_length_87212_cov_19.426655|1|8	SRR11450586|k141_213458_flag=1_multi=6442.8094_len=10045	Pisuviricota	GUT_GENOME011995	d__Bacteria;p__Spirochaetota;c__Spirochaetia;o__Treponematales;f__Treponemataceae;g__Treponema_D;s__	24	0	3.09e-05
GUT_GENOME170660|NODE_42_length_87212_cov_19.426655|1|8	SRR11829260|k141_2197_flag=1_multi=57.0000_len=4196	Kitrinoviricota	GUT_GENOME011995	d__Bacteria;p__Spirochaetota;c__Spirochaetia;o__Treponematales;f__Treponemataceae;g__Treponema_D;s__	24	0	3.09e-05
GUT_GENOME170660|NODE_42_length_87212_cov_19.426655|1|8	SRR17481244|k141_434_flag=1_multi=161.0000_len=2746	Kitrinoviricota	GUT_GENOME011995	d__Bacteria;p__Spirochaetota;c__Spirochaetia;o__Treponematales;f__Treponemataceae;g__Treponema_D;s__	24	0	3.09e-05
GUT_GENOME170660|NODE_42_length_87212_cov_19.426655|1|8	BC-0345649514|k141_807	Pisuviricota	GUT_GENOME011995	d__Bacteria;p__Spirochaetota;c__Spirochaetia;o__Treponematales;f__Treponemataceae;g__Treponema_D;s__	24	0	3.09e-05
GUT_GENOME170660|NODE_42_length_87212_cov_19.426655|1|8	SRR11648176|k141_60865_flag=1_multi=117.8157_len=8095	Pisuviricota	GUT_GENOME011995	d__Bacteria;p__Spirochaetota;c__Spirochaetia;o__Treponematales;f__Treponemataceae;g__Treponema_D;s__	24	0	3.09e-05
GUT_GENOME170660|NODE_42_length_87212_cov_19.426655|1|8	SRR11450586|k141_213458_flag=1_multi=6442.8094_len=10045	Pisuviricota	GUT_GENOME011995	d__Bacteria;p__Spirochaetota;c__Spirochaetia;o__Treponematales;f__Treponemataceae;g__Treponema_D;s__	24	0	3.09e-05
GUT_GENOME170660|NODE_42_length_87212_cov_19.426655|1|8	SRR11648360|k141_187449_flag=1_multi=2812.0000_len=9848	Pisuviricota	GUT_GENOME011995	d__Bacteria;p__Spirochaetota;c__Spirochaetia;o__Treponematales;f__Treponemataceae;g__Treponema_D;s__	24	0	3.09e-05
GUT_GENOME170660|NODE_42_length_87212_cov_19.426655|1|8	SRR18771403|k141_131354_flag=1_multi=48.8407_len=10690	Pisuviricota	GUT_GENOME011995	d__Bacteria;p__Spirochaetota;c__Spirochaetia;o__Treponematales;f__Treponemataceae;g__Treponema_D;s__	24	0	3.09e-05
GUT_GENOME170660|NODE_42_length_87212_cov_19.426655|1|8	SRR11450586|k141_213458_flag=1_multi=6442.8094_len=10045	Pisuviricota	GUT_GENOME011995	d__Bacteria;p__Spirochaetota;c__Spirochaetia;o__Treponematales;f__Treponemataceae;g__Treponema_D;s__	24	0	3.09e-05
GUT_GENOME170660|NODE_42_length_87212_cov_19.426655|1|8	SRR11648360|k141_2427_flag=0_multi=550.5579_len=8547	Pisuviricota	GUT_GENOME011995	d__Bacteria;p__Spirochaetota;c__Spirochaetia;o__Treponematales;f__Treponemataceae;g__Treponema_D;s__	24	0	3.09e-05
GUT_GENOME170660|NODE_42_length_87212_cov_19.426655|1|8	SRR17481244|k141_434_flag=1_multi=161.0000_len=2746	Kitrinoviricota	GUT_GENOME011995	d__Bacteria;p__Spirochaetota;c__Spirochaetia;o__Treponematales;f__Treponemataceae;g__Treponema_D;s__	24	0	3.09e-05
GUT_GENOME170660|NODE_42_length_87212_cov_19.426655|1|8	SRR11450586|k141_213458_flag=1_multi=6442.8094_len=10045	Pisuviricota	GUT_GENOME011995	d__Bacteria;p__Spirochaetota;c__Spirochaetia;o__Treponematales;f__Treponemataceae;g__Treponema_D;s__	24	0	3.09e-05
GUT_GENOME170660|NODE_42_length_87212_cov_19.426655|1|8	SRR11450579|k141_17049_flag=1_multi=4764.0000_len=8934	Pisuviricota	GUT_GENOME011995	d__Bacteria;p__Spirochaetota;c__Spirochaetia;o__Treponematales;f__Treponemataceae;g__Treponema_D;s__	24	0	3.09e-05
GUT_GENOME170660|NODE_42_length_87212_cov_19.426655|1|8	SRR11450578|k141_2066_flag=1_multi=317.0000_len=8175	Pisuviricota	GUT_GENOME011995	d__Bacteria;p__Spirochaetota;c__Spirochaetia;o__Treponematales;f__Treponemataceae;g__Treponema_D;s__	24	0	3.09e-05
GUT_GENOME170660|NODE_42_length_87212_cov_19.426655|1|8	SRR11648360|k141_238775_flag=1_multi=340.0000_len=9219	Pisuviricota	GUT_GENOME011995	d__Bacteria;p__Spirochaetota;c__Spirochaetia;o__Treponematales;f__Treponemataceae;g__Treponema_D;s__	24	0	3.09e-05
GUT_GENOME170660|NODE_42_length_87212_cov_19.426655|1|8	BC-0345724490|k141_9515	Duplornaviricota	GUT_GENOME011995	d__Bacteria;p__Spirochaetota;c__Spirochaetia;o__Treponematales;f__Treponemataceae;g__Treponema_D;s__	24	0	3.09e-05
GUT_GENOME170660|NODE_42_length_87212_cov_19.426655|1|8	SRR11648360|k141_2427_flag=0_multi=550.5579_len=8547	Pisuviricota	GUT_GENOME011995	d__Bacteria;p__Spirochaetota;c__Spirochaetia;o__Treponematales;f__Treponemataceae;g__Treponema_D;s__	24	0	3.09e-05
GUT_GENOME170660|NODE_42_length_87212_cov_19.426655|1|8	SRR11648360|k141_187449_flag=1_multi=2812.0000_len=9848	Pisuviricota	GUT_GENOME011995	d__Bacteria;p__Spirochaetota;c__Spirochaetia;o__Treponematales;f__Treponemataceae;g__Treponema_D;s__	24	0	3.09e-05
GUT_GENOME170660|NODE_42_length_87212_cov_19.426655|1|8	SRR11648176|k141_60865_flag=1_multi=117.8157_len=8095	Pisuviricota	GUT_GENOME011995	d__Bacteria;p__Spirochaetota;c__Spirochaetia;o__Treponematales;f__Treponemataceae;g__Treponema_D;s__	24	0	3.09e-05
GUT_GENOME170660|NODE_42_length_87212_cov_19.426655|1|8	SRR11649087|k141_77109_flag=1_multi=287.0000_len=9144	Pisuviricota	GUT_GENOME011995	d__Bacteria;p__Spirochaetota;c__Spirochaetia;o__Treponematales;f__Treponemataceae;g__Treponema_D;s__	24	0	3.09e-05
GUT_GENOME170660|NODE_42_length_87212_cov_19.426655|1|8	SRR11450579|k141_3421_flag=1_multi=110.0000_len=8612	Pisuviricota	GUT_GENOME011995	d__Bacteria;p__Spirochaetota;c__Spirochaetia;o__Treponematales;f__Treponemataceae;g__Treponema_D;s__	24	0	3.09e-05
GUT_GENOME170660|NODE_42_length_87212_cov_19.426655|1|8	SRR10849374|k141_328568_flag=1_multi=20.0000_len=3015	Lenarviricota	GUT_GENOME011995	d__Bacteria;p__Spirochaetota;c__Spirochaetia;o__Treponematales;f__Treponemataceae;g__Treponema_D;s__	24	0	3.09e-05
GUT_GENOME170660|NODE_42_length_87212_cov_19.426655|1|8	SRR11450579|k141_17049_flag=1_multi=4764.0000_len=8934	Pisuviricota	GUT_GENOME011995	d__Bacteria;p__Spirochaetota;c__Spirochaetia;o__Treponematales;f__Treponemataceae;g__Treponema_D;s__	24	0	3.09e-05
GUT_GENOME170660|NODE_42_length_87212_cov_19.426655|1|8	SRR11450579|k141_17049_flag=1_multi=4764.0000_len=8934	Pisuviricota	GUT_GENOME011995	d__Bacteria;p__Spirochaetota;c__Spirochaetia;o__Treponematales;f__Treponemataceae;g__Treponema_D;s__	24	0	3.09e-05
GUT_GENOME170660|NODE_42_length_87212_cov_19.426655|1|8	BC-0345318742|k141_63184	Pisuviricota	GUT_GENOME011995	d__Bacteria;p__Spirochaetota;c__Spirochaetia;o__Treponematales;f__Treponemataceae;g__Treponema_D;s__	24	0	3.09e-05
GUT_GENOME170660|NODE_42_length_87212_cov_19.426655|1|8	SRR11450577|k141_1033_flag=1_multi=59.9742_len=2428	Pisuviricota	GUT_GENOME011995	d__Bacteria;p__Spirochaetota;c__Spirochaetia;o__Treponematales;f__Treponemataceae;g__Treponema_D;s__	24	0	3.09e-05
GUT_GENOME170660|NODE_42_length_87212_cov_19.426655|1|8	SRR11450579|k141_236588_flag=1_multi=105.0000_len=8198	Pisuviricota	GUT_GENOME011995	d__Bacteria;p__Spirochaetota;c__Spirochaetia;o__Treponematales;f__Treponemataceae;g__Treponema_D;s__	24	0	3.09e-05
GUT_GENOME170660|NODE_42_length_87212_cov_19.426655|1|8	SRR11450579|k141_3421_flag=1_multi=110.0000_len=8612	Pisuviricota	GUT_GENOME011995	d__Bacteria;p__Spirochaetota;c__Spirochaetia;o__Treponematales;f__Treponemataceae;g__Treponema_D;s__	24	0	3.09e-05
GUT_GENOME170660|NODE_42_length_87212_cov_19.426655|1|8	SRR11828900|k141_55027_flag=1_multi=15.0000_len=8550	Pisuviricota	GUT_GENOME011995	d__Bacteria;p__Spirochaetota;c__Spirochaetia;o__Treponematales;f__Treponemataceae;g__Treponema_D;s__	24	0	3.09e-05
GUT_GENOME170660|NODE_42_length_87212_cov_19.426655|1|8	SRR10849374|k141_328568_flag=1_multi=20.0000_len=3015	Lenarviricota	GUT_GENOME011995	d__Bacteria;p__Spirochaetota;c__Spirochaetia;o__Treponematales;f__Treponemataceae;g__Treponema_D;s__	24	0	3.09e-05
GUT_GENOME170660|NODE_42_length_87212_cov_19.426655|1|8	SRR11648360|k141_2427_flag=0_multi=550.5579_len=8547	Pisuviricota	GUT_GENOME011995	d__Bacteria;p__Spirochaetota;c__Spirochaetia;o__Treponematales;f__Treponemataceae;g__Treponema_D;s__	24	0	3.09e-05
GUT_GENOME170660|NODE_42_length_87212_cov_19.426655|1|8	SRR11829260|k141_2197_flag=1_multi=57.0000_len=4196	Kitrinoviricota	GUT_GENOME011995	d__Bacteria;p__Spirochaetota;c__Spirochaetia;o__Treponematales;f__Treponemataceae;g__Treponema_D;s__	24	0	3.09e-05
GUT_GENOME170660|NODE_42_length_87212_cov_19.426655|1|8	SRR18771403|k141_131354_flag=1_multi=48.8407_len=10690	Pisuviricota	GUT_GENOME011995	d__Bacteria;p__Spirochaetota;c__Spirochaetia;o__Treponematales;f__Treponemataceae;g__Treponema_D;s__	24	0	3.09e-05
GUT_GENOME170660|NODE_42_length_87212_cov_19.426655|1|8	SRR11450579|k141_236588_flag=1_multi=105.0000_len=8198	Pisuviricota	GUT_GENOME011995	d__Bacteria;p__Spirochaetota;c__Spirochaetia;o__Treponematales;f__Treponemataceae;g__Treponema_D;s__	24	0	3.09e-05
GUT_GENOME170660|NODE_42_length_87212_cov_19.426655|1|8	SRR11450579|k141_17049_flag=1_multi=4764.0000_len=8934	Pisuviricota	GUT_GENOME011995	d__Bacteria;p__Spirochaetota;c__Spirochaetia;o__Treponematales;f__Treponemataceae;g__Treponema_D;s__	24	0	3.09e-05
GUT_GENOME170660|NODE_42_length_87212_cov_19.426655|1|8	SRR11450579|k141_236588_flag=1_multi=105.0000_len=8198	Pisuviricota	GUT_GENOME011995	d__Bacteria;p__Spirochaetota;c__Spirochaetia;o__Treponematales;f__Treponemataceae;g__Treponema_D;s__	24	0	3.09e-05
GUT_GENOME170660|NODE_42_length_87212_cov_19.426655|1|8	SRR11828900|k141_55027_flag=1_multi=15.0000_len=8550	Pisuviricota	GUT_GENOME011995	d__Bacteria;p__Spirochaetota;c__Spirochaetia;o__Treponematales;f__Treponemataceae;g__Treponema_D;s__	24	0	3.09e-05
GUT_GENOME170660|NODE_42_length_87212_cov_19.426655|1|8	BC-0345318769|k141_41055	Pisuviricota	GUT_GENOME011995	d__Bacteria;p__Spirochaetota;c__Spirochaetia;o__Treponematales;f__Treponemataceae;g__Treponema_D;s__	24	0	3.09e-05
GUT_GENOME170660|NODE_42_length_87212_cov_19.426655|1|8	SRR10904365|k141_287437_flag=1_multi=32.0000_len=4454	Kitrinoviricota	GUT_GENOME011995	d__Bacteria;p__Spirochaetota;c__Spirochaetia;o__Treponematales;f__Treponemataceae;g__Treponema_D;s__	24	0	3.09e-05
GUT_GENOME170660|NODE_42_length_87212_cov_19.426655|1|8	BC-0345698157|k141_28560	Pisuviricota	GUT_GENOME011995	d__Bacteria;p__Spirochaetota;c__Spirochaetia;o__Treponematales;f__Treponemataceae;g__Treponema_D;s__	24	0	3.09e-05
GUT_GENOME170660|NODE_42_length_87212_cov_19.426655|1|8	SRR11450579|k141_236588_flag=1_multi=105.0000_len=8198	Pisuviricota	GUT_GENOME011995	d__Bacteria;p__Spirochaetota;c__Spirochaetia;o__Treponematales;f__Treponemataceae;g__Treponema_D;s__	24	0	3.09e-05
GUT_GENOME170660|NODE_42_length_87212_cov_19.426655|1|8	BC-0302413540|k141_158	Kitrinoviricota	GUT_GENOME011995	d__Bacteria;p__Spirochaetota;c__Spirochaetia;o__Treponematales;f__Treponemataceae;g__Treponema_D;s__	24	0	3.09e-05
GUT_GENOME170660|NODE_42_length_87212_cov_19.426655|1|8	BC-0345649514|k141_807	Pisuviricota	GUT_GENOME011995	d__Bacteria;p__Spirochaetota;c__Spirochaetia;o__Treponematales;f__Treponemataceae;g__Treponema_D;s__	24	0	3.09e-05
GUT_GENOME170660|NODE_42_length_87212_cov_19.426655|1|8	SRR11450580|k141_109913_flag=1_multi=102.0000_len=6558	Pisuviricota	GUT_GENOME011995	d__Bacteria;p__Spirochaetota;c__Spirochaetia;o__Treponematales;f__Treponemataceae;g__Treponema_D;s__	24	0	3.09e-05
GUT_GENOME170660|NODE_42_length_87212_cov_19.426655|1|8	SRR10849374|k141_328568_flag=1_multi=20.0000_len=3015	Lenarviricota	GUT_GENOME011995	d__Bacteria;p__Spirochaetota;c__Spirochaetia;o__Treponematales;f__Treponemataceae;g__Treponema_D;s__	24	0	3.09e-05
GUT_GENOME170660|NODE_42_length_87212_cov_19.426655|1|8	SRR11450579|k141_3421_flag=1_multi=110.0000_len=8612	Pisuviricota	GUT_GENOME011995	d__Bacteria;p__Spirochaetota;c__Spirochaetia;o__Treponematales;f__Treponemataceae;g__Treponema_D;s__	24	0	3.09e-05
GUT_GENOME170660|NODE_42_length_87212_cov_19.426655|1|8	SRR11648360|k141_2427_flag=0_multi=550.5579_len=8547	Pisuviricota	GUT_GENOME011995	d__Bacteria;p__Spirochaetota;c__Spirochaetia;o__Treponematales;f__Treponemataceae;g__Treponema_D;s__	24	0	3.09e-05
GUT_GENOME170660|NODE_42_length_87212_cov_19.426655|1|8	BC-0302413540|k141_158	Kitrinoviricota	GUT_GENOME011995	d__Bacteria;p__Spirochaetota;c__Spirochaetia;o__Treponematales;f__Treponemataceae;g__Treponema_D;s__	24	0	3.09e-05
GUT_GENOME170660|NODE_42_length_87212_cov_19.426655|1|8	BC-0345724490|k141_9515	Duplornaviricota	GUT_GENOME011995	d__Bacteria;p__Spirochaetota;c__Spirochaetia;o__Treponematales;f__Treponemataceae;g__Treponema_D;s__	24	0	3.09e-05
GUT_GENOME170660|NODE_42_length_87212_cov_19.426655|1|8	SRR11450580|k141_109913_flag=1_multi=102.0000_len=6558	Pisuviricota	GUT_GENOME011995	d__Bacteria;p__Spirochaetota;c__Spirochaetia;o__Treponematales;f__Treponemataceae;g__Treponema_D;s__	24	0	3.09e-05
GUT_GENOME170660|NODE_42_length_87212_cov_19.426655|1|8	SRR11450579|k141_3421_flag=1_multi=110.0000_len=8612	Pisuviricota	GUT_GENOME011995	d__Bacteria;p__Spirochaetota;c__Spirochaetia;o__Treponematales;f__Treponemataceae;g__Treponema_D;s__	24	0	3.09e-05
GUT_GENOME170660|NODE_42_length_87212_cov_19.426655|1|8	SRR18771403|k141_131354_flag=1_multi=48.8407_len=10690	Pisuviricota	GUT_GENOME011995	d__Bacteria;p__Spirochaetota;c__Spirochaetia;o__Treponematales;f__Treponemataceae;g__Treponema_D;s__	24	0	3.09e-05
GUT_GENOME170660|NODE_42_length_87212_cov_19.426655|1|8	SRR11450580|k141_1194_flag=1_multi=129.0000_len=9098	Pisuviricota	GUT_GENOME011995	d__Bacteria;p__Spirochaetota;c__Spirochaetia;o__Treponematales;f__Treponemataceae;g__Treponema_D;s__	24	0	3.09e-05
GUT_GENOME170660|NODE_42_length_87212_cov_19.426655|1|8	SRR11648202|k141_322_flag=0_multi=521.7310_len=1955	Pisuviricota	GUT_GENOME011995	d__Bacteria;p__Spirochaetota;c__Spirochaetia;o__Treponematales;f__Treponemataceae;g__Treponema_D;s__	24	0	3.09e-05
GUT_GENOME170660|NODE_42_length_87212_cov_19.426655|1|8	SRR12686088|k141_14412_flag=1_multi=15.0000_len=5750	Pisuviricota	GUT_GENOME011995	d__Bacteria;p__Spirochaetota;c__Spirochaetia;o__Treponematales;f__Treponemataceae;g__Treponema_D;s__	24	0	3.09e-05
GUT_GENOME170660|NODE_42_length_87212_cov_19.426655|1|8	BC-0345724490|k141_9515	Duplornaviricota	GUT_GENOME011995	d__Bacteria;p__Spirochaetota;c__Spirochaetia;o__Treponematales;f__Treponemataceae;g__Treponema_D;s__	24	0	3.09e-05
GUT_GENOME170660|NODE_42_length_87212_cov_19.426655|1|8	BC-0302413540|k141_158	Kitrinoviricota	GUT_GENOME011995	d__Bacteria;p__Spirochaetota;c__Spirochaetia;o__Treponematales;f__Treponemataceae;g__Treponema_D;s__	24	0	3.09e-05
GUT_GENOME170660|NODE_42_length_87212_cov_19.426655|1|8	SRR11450579|k141_3421_flag=1_multi=110.0000_len=8612	Pisuviricota	GUT_GENOME011995	d__Bacteria;p__Spirochaetota;c__Spirochaetia;o__Treponematales;f__Treponemataceae;g__Treponema_D;s__	24	0	3.09e-05
GUT_GENOME170660|NODE_42_length_87212_cov_19.426655|1|8	SRR11648176|k141_1576_flag=1_multi=88.2328_len=8707	Pisuviricota	GUT_GENOME011995	d__Bacteria;p__Spirochaetota;c__Spirochaetia;o__Treponematales;f__Treponemataceae;g__Treponema_D;s__	24	0	3.09e-05
GUT_GENOME170660|NODE_42_length_87212_cov_19.426655|1|8	SRR10849374|k141_328568_flag=1_multi=20.0000_len=3015	Lenarviricota	GUT_GENOME011995	d__Bacteria;p__Spirochaetota;c__Spirochaetia;o__Treponematales;f__Treponemataceae;g__Treponema_D;s__	24	0	3.09e-05
GUT_GENOME170660|NODE_42_length_87212_cov_19.426655|1|8	SRR11450579|k141_3421_flag=1_multi=110.0000_len=8612	Pisuviricota	GUT_GENOME011995	d__Bacteria;p__Spirochaetota;c__Spirochaetia;o__Treponematales;f__Treponemataceae;g__Treponema_D;s__	24	0	3.09e-05
GUT_GENOME170660|NODE_42_length_87212_cov_19.426655|1|8	SRR11450579|k141_3421_flag=1_multi=110.0000_len=8612	Pisuviricota	GUT_GENOME011995	d__Bacteria;p__Spirochaetota;c__Spirochaetia;o__Treponematales;f__Treponemataceae;g__Treponema_D;s__	24	0	3.09e-05
GUT_GENOME170660|NODE_42_length_87212_cov_19.426655|1|8	SRR11450579|k141_236588_flag=1_multi=105.0000_len=8198	Pisuviricota	GUT_GENOME011995	d__Bacteria;p__Spirochaetota;c__Spirochaetia;o__Treponematales;f__Treponemataceae;g__Treponema_D;s__	24	0	3.09e-05
GUT_GENOME170660|NODE_42_length_87212_cov_19.426655|1|8	SRR11450580|k141_1194_flag=1_multi=129.0000_len=9098	Pisuviricota	GUT_GENOME011995	d__Bacteria;p__Spirochaetota;c__Spirochaetia;o__Treponematales;f__Treponemataceae;g__Treponema_D;s__	24	0	3.09e-05
GUT_GENOME170660|NODE_42_length_87212_cov_19.426655|1|8	BC-0345724490|k141_9515	Duplornaviricota	GUT_GENOME011995	d__Bacteria;p__Spirochaetota;c__Spirochaetia;o__Treponematales;f__Treponemataceae;g__Treponema_D;s__	24	0	3.09e-05
GUT_GENOME170660|NODE_42_length_87212_cov_19.426655|1|8	BC-0345318742|k141_63184	Pisuviricota	GUT_GENOME011995	d__Bacteria;p__Spirochaetota;c__Spirochaetia;o__Treponematales;f__Treponemataceae;g__Treponema_D;s__	24	0	3.09e-05
GUT_GENOME170660|NODE_42_length_87212_cov_19.426655|1|8	SRR11450579|k141_76622_flag=1_multi=211.0000_len=8995	Pisuviricota	GUT_GENOME011995	d__Bacteria;p__Spirochaetota;c__Spirochaetia;o__Treponematales;f__Treponemataceae;g__Treponema_D;s__	24	0	3.09e-05
GUT_GENOME170660|NODE_42_length_87212_cov_19.426655|1|8	BC-0345724490|k141_9515	Duplornaviricota	GUT_GENOME011995	d__Bacteria;p__Spirochaetota;c__Spirochaetia;o__Treponematales;f__Treponemataceae;g__Treponema_D;s__	24	0	3.09e-05
GUT_GENOME170660|NODE_42_length_87212_cov_19.426655|1|8	SRR11649087|k141_2929_flag=1_multi=251.0000_len=9689	Pisuviricota	GUT_GENOME011995	d__Bacteria;p__Spirochaetota;c__Spirochaetia;o__Treponematales;f__Treponemataceae;g__Treponema_D;s__	24	0	3.09e-05
GUT_GENOME170660|NODE_42_length_87212_cov_19.426655|1|8	SRR11450580|k141_1194_flag=1_multi=129.0000_len=9098	Pisuviricota	GUT_GENOME011995	d__Bacteria;p__Spirochaetota;c__Spirochaetia;o__Treponematales;f__Treponemataceae;g__Treponema_D;s__	24	0	3.09e-05
GUT_GENOME170660|NODE_42_length_87212_cov_19.426655|1|8	SRR11450580|k141_1194_flag=1_multi=129.0000_len=9098	Pisuviricota	GUT_GENOME011995	d__Bacteria;p__Spirochaetota;c__Spirochaetia;o__Treponematales;f__Treponemataceae;g__Treponema_D;s__	24	0	3.09e-05
GUT_GENOME170660|NODE_42_length_87212_cov_19.426655|1|8	SRR18770940|k141_6846_flag=1_multi=13.0000_len=3731	Pisuviricota	GUT_GENOME011995	d__Bacteria;p__Spirochaetota;c__Spirochaetia;o__Treponematales;f__Treponemataceae;g__Treponema_D;s__	23	0	0.000111
GUT_GENOME170660|NODE_42_length_87212_cov_19.426655|1|8	SRR10849374|k141_328568_flag=1_multi=20.0000_len=3015	Lenarviricota	GUT_GENOME011995	d__Bacteria;p__Spirochaetota;c__Spirochaetia;o__Treponematales;f__Treponemataceae;g__Treponema_D;s__	24	0	3.09e-05
GUT_GENOME170660|NODE_42_length_87212_cov_19.426655|1|8	SRR11450586|k141_213458_flag=1_multi=6442.8094_len=10045	Pisuviricota	GUT_GENOME011995	d__Bacteria;p__Spirochaetota;c__Spirochaetia;o__Treponematales;f__Treponemataceae;g__Treponema_D;s__	24	0	3.09e-05
GUT_GENOME170660|NODE_42_length_87212_cov_19.426655|1|8	SRR11648176|k141_60865_flag=1_multi=117.8157_len=8095	Pisuviricota	GUT_GENOME011995	d__Bacteria;p__Spirochaetota;c__Spirochaetia;o__Treponematales;f__Treponemataceae;g__Treponema_D;s__	24	0	3.09e-05
GUT_GENOME170660|NODE_42_length_87212_cov_19.426655|1|8	SRR11450579|k141_236588_flag=1_multi=105.0000_len=8198	Pisuviricota	GUT_GENOME011995	d__Bacteria;p__Spirochaetota;c__Spirochaetia;o__Treponematales;f__Treponemataceae;g__Treponema_D;s__	24	0	3.09e-05
GUT_GENOME170660|NODE_42_length_87212_cov_19.426655|1|8	SRR11648360|k141_187449_flag=1_multi=2812.0000_len=9848	Pisuviricota	GUT_GENOME011995	d__Bacteria;p__Spirochaetota;c__Spirochaetia;o__Treponematales;f__Treponemataceae;g__Treponema_D;s__	24	0	3.09e-05
GUT_GENOME170660|NODE_42_length_87212_cov_19.426655|1|8	SRR11648360|k141_2427_flag=0_multi=550.5579_len=8547	Pisuviricota	GUT_GENOME011995	d__Bacteria;p__Spirochaetota;c__Spirochaetia;o__Treponematales;f__Treponemataceae;g__Treponema_D;s__	24	0	3.09e-05
GUT_GENOME170660|NODE_42_length_87212_cov_19.426655|1|8	SRR10849374|k141_328568_flag=1_multi=20.0000_len=3015	Lenarviricota	GUT_GENOME011995	d__Bacteria;p__Spirochaetota;c__Spirochaetia;o__Treponematales;f__Treponemataceae;g__Treponema_D;s__	24	0	3.09e-05
GUT_GENOME170660|NODE_42_length_87212_cov_19.426655|1|8	BC-0332571705|k141_1013	Kitrinoviricota	GUT_GENOME011995	d__Bacteria;p__Spirochaetota;c__Spirochaetia;o__Treponematales;f__Treponemataceae;g__Treponema_D;s__	24	0	3.09e-05
GUT_GENOME170660|NODE_42_length_87212_cov_19.426655|1|8	SRR11648360|k141_238775_flag=1_multi=340.0000_len=9219	Pisuviricota	GUT_GENOME011995	d__Bacteria;p__Spirochaetota;c__Spirochaetia;o__Treponematales;f__Treponemataceae;g__Treponema_D;s__	24	0	3.09e-05
GUT_GENOME170660|NODE_42_length_87212_cov_19.426655|1|8	SRR11450580|k141_109913_flag=1_multi=102.0000_len=6558	Pisuviricota	GUT_GENOME011995	d__Bacteria;p__Spirochaetota;c__Spirochaetia;o__Treponematales;f__Treponemataceae;g__Treponema_D;s__	24	0	3.09e-05
GUT_GENOME170660|NODE_42_length_87212_cov_19.426655|1|8	SRR10849374|k141_328568_flag=1_multi=20.0000_len=3015	Lenarviricota	GUT_GENOME011995	d__Bacteria;p__Spirochaetota;c__Spirochaetia;o__Treponematales;f__Treponemataceae;g__Treponema_D;s__	24	0	3.09e-05
GUT_GENOME170660|NODE_42_length_87212_cov_19.426655|1|8	SRR10849374|k141_328568_flag=1_multi=20.0000_len=3015	Lenarviricota	GUT_GENOME011995	d__Bacteria;p__Spirochaetota;c__Spirochaetia;o__Treponematales;f__Treponemataceae;g__Treponema_D;s__	24	0	3.09e-05
GUT_GENOME170660|NODE_42_length_87212_cov_19.426655|1|8	BC-0302413540|k141_158	Kitrinoviricota	GUT_GENOME011995	d__Bacteria;p__Spirochaetota;c__Spirochaetia;o__Treponematales;f__Treponemataceae;g__Treponema_D;s__	24	0	3.09e-05
GUT_GENOME170660|NODE_42_length_87212_cov_19.426655|1|8	SRR11450580|k141_1194_flag=1_multi=129.0000_len=9098	Pisuviricota	GUT_GENOME011995	d__Bacteria;p__Spirochaetota;c__Spirochaetia;o__Treponematales;f__Treponemataceae;g__Treponema_D;s__	24	0	3.09e-05
GUT_GENOME170660|NODE_42_length_87212_cov_19.426655|1|8	SRR11450579|k141_236588_flag=1_multi=105.0000_len=8198	Pisuviricota	GUT_GENOME011995	d__Bacteria;p__Spirochaetota;c__Spirochaetia;o__Treponematales;f__Treponemataceae;g__Treponema_D;s__	24	0	3.09e-05
GUT_GENOME170660|NODE_42_length_87212_cov_19.426655|1|8	BC-0332571705|k141_1013	Kitrinoviricota	GUT_GENOME011995	d__Bacteria;p__Spirochaetota;c__Spirochaetia;o__Treponematales;f__Treponemataceae;g__Treponema_D;s__	24	0	3.09e-05
GUT_GENOME170660|NODE_42_length_87212_cov_19.426655|1|8	SRR11450577|k141_1033_flag=1_multi=59.9742_len=2428	Pisuviricota	GUT_GENOME011995	d__Bacteria;p__Spirochaetota;c__Spirochaetia;o__Treponematales;f__Treponemataceae;g__Treponema_D;s__	24	0	3.09e-05
GUT_GENOME170660|NODE_42_length_87212_cov_19.426655|1|8	SRR11648202|k141_322_flag=0_multi=521.7310_len=1955	Pisuviricota	GUT_GENOME011995	d__Bacteria;p__Spirochaetota;c__Spirochaetia;o__Treponematales;f__Treponemataceae;g__Treponema_D;s__	24	0	3.09e-05
GUT_GENOME170660|NODE_42_length_87212_cov_19.426655|1|8	SRR11648360|k141_187449_flag=1_multi=2812.0000_len=9848	Pisuviricota	GUT_GENOME011995	d__Bacteria;p__Spirochaetota;c__Spirochaetia;o__Treponematales;f__Treponemataceae;g__Treponema_D;s__	24	0	3.09e-05
GUT_GENOME170660|NODE_42_length_87212_cov_19.426655|1|8	SRR11648360|k141_2427_flag=0_multi=550.5579_len=8547	Pisuviricota	GUT_GENOME011995	d__Bacteria;p__Spirochaetota;c__Spirochaetia;o__Treponematales;f__Treponemataceae;g__Treponema_D;s__	24	0	3.09e-05
GUT_GENOME170660|NODE_42_length_87212_cov_19.426655|1|8	SRR11648360|k141_187449_flag=1_multi=2812.0000_len=9848	Pisuviricota	GUT_GENOME011995	d__Bacteria;p__Spirochaetota;c__Spirochaetia;o__Treponematales;f__Treponemataceae;g__Treponema_D;s__	24	0	3.09e-05
GUT_GENOME170660|NODE_42_length_87212_cov_19.426655|1|8	SRR11829260|k141_2197_flag=1_multi=57.0000_len=4196	Kitrinoviricota	GUT_GENOME011995	d__Bacteria;p__Spirochaetota;c__Spirochaetia;o__Treponematales;f__Treponemataceae;g__Treponema_D;s__	24	0	3.09e-05
GUT_GENOME170660|NODE_42_length_87212_cov_19.426655|1|8	SRR11450579|k141_236588_flag=1_multi=105.0000_len=8198	Pisuviricota	GUT_GENOME011995	d__Bacteria;p__Spirochaetota;c__Spirochaetia;o__Treponematales;f__Treponemataceae;g__Treponema_D;s__	24	0	3.09e-05
GUT_GENOME170660|NODE_42_length_87212_cov_19.426655|1|8	SRR11563379|k141_984_flag=1_multi=10.0000_len=5356	Pisuviricota	GUT_GENOME011995	d__Bacteria;p__Spirochaetota;c__Spirochaetia;o__Treponematales;f__Treponemataceae;g__Treponema_D;s__	24	0	3.09e-05
GUT_GENOME170660|NODE_42_length_87212_cov_19.426655|1|8	SRR11649087|k141_263042_flag=1_multi=27.0000_len=4125	Kitrinoviricota	GUT_GENOME011995	d__Bacteria;p__Spirochaetota;c__Spirochaetia;o__Treponematales;f__Treponemataceae;g__Treponema_D;s__	24	0	3.09e-05
GUT_GENOME170660|NODE_42_length_87212_cov_19.426655|1|8	SRR11450586|k141_213458_flag=1_multi=6442.8094_len=10045	Pisuviricota	GUT_GENOME011995	d__Bacteria;p__Spirochaetota;c__Spirochaetia;o__Treponematales;f__Treponemataceae;g__Treponema_D;s__	24	0	3.09e-05
GUT_GENOME170660|NODE_42_length_87212_cov_19.426655|1|8	SRR11450579|k141_17049_flag=1_multi=4764.0000_len=8934	Pisuviricota	GUT_GENOME011995	d__Bacteria;p__Spirochaetota;c__Spirochaetia;o__Treponematales;f__Treponemataceae;g__Treponema_D;s__	24	0	3.09e-05
GUT_GENOME170660|NODE_42_length_87212_cov_19.426655|1|8	SRR11450579|k141_17049_flag=1_multi=4764.0000_len=8934	Pisuviricota	GUT_GENOME011995	d__Bacteria;p__Spirochaetota;c__Spirochaetia;o__Treponematales;f__Treponemataceae;g__Treponema_D;s__	24	0	3.09e-05
GUT_GENOME170660|NODE_42_length_87212_cov_19.426655|1|8	SRR11648176|k141_60865_flag=1_multi=117.8157_len=8095	Pisuviricota	GUT_GENOME011995	d__Bacteria;p__Spirochaetota;c__Spirochaetia;o__Treponematales;f__Treponemataceae;g__Treponema_D;s__	24	0	3.09e-05
GUT_GENOME170660|NODE_42_length_87212_cov_19.426655|1|8	SRR10849374|k141_328568_flag=1_multi=20.0000_len=3015	Lenarviricota	GUT_GENOME011995	d__Bacteria;p__Spirochaetota;c__Spirochaetia;o__Treponematales;f__Treponemataceae;g__Treponema_D;s__	24	0	3.09e-05
GUT_GENOME170660|NODE_42_length_87212_cov_19.426655|1|8	SRR11450579|k141_17049_flag=1_multi=4764.0000_len=8934	Pisuviricota	GUT_GENOME011995	d__Bacteria;p__Spirochaetota;c__Spirochaetia;o__Treponematales;f__Treponemataceae;g__Treponema_D;s__	24	0	3.09e-05
GUT_GENOME170660|NODE_42_length_87212_cov_19.426655|1|8	SRR11450579|k141_236588_flag=1_multi=105.0000_len=8198	Pisuviricota	GUT_GENOME011995	d__Bacteria;p__Spirochaetota;c__Spirochaetia;o__Treponematales;f__Treponemataceae;g__Treponema_D;s__	24	0	3.09e-05
GUT_GENOME170660|NODE_42_length_87212_cov_19.426655|1|8	SRR11450579|k141_3421_flag=1_multi=110.0000_len=8612	Pisuviricota	GUT_GENOME011995	d__Bacteria;p__Spirochaetota;c__Spirochaetia;o__Treponematales;f__Treponemataceae;g__Treponema_D;s__	24	0	3.09e-05
GUT_GENOME170660|NODE_42_length_87212_cov_19.426655|1|8	BC-0345649514|k141_807	Pisuviricota	GUT_GENOME011995	d__Bacteria;p__Spirochaetota;c__Spirochaetia;o__Treponematales;f__Treponemataceae;g__Treponema_D;s__	24	0	3.09e-05
GUT_GENOME170660|NODE_42_length_87212_cov_19.426655|1|8	SRR11648360|k141_187449_flag=1_multi=2812.0000_len=9848	Pisuviricota	GUT_GENOME011995	d__Bacteria;p__Spirochaetota;c__Spirochaetia;o__Treponematales;f__Treponemataceae;g__Treponema_D;s__	24	0	3.09e-05
GUT_GENOME170660|NODE_42_length_87212_cov_19.426655|1|8	SRR11648360|k141_2427_flag=0_multi=550.5579_len=8547	Pisuviricota	GUT_GENOME011995	d__Bacteria;p__Spirochaetota;c__Spirochaetia;o__Treponematales;f__Treponemataceae;g__Treponema_D;s__	24	0	3.09e-05
GUT_GENOME170660|NODE_42_length_87212_cov_19.426655|1|8	BC-0345317873|k141_88724	Pisuviricota	GUT_GENOME011995	d__Bacteria;p__Spirochaetota;c__Spirochaetia;o__Treponematales;f__Treponemataceae;g__Treponema_D;s__	24	0	3.09e-05
GUT_GENOME170660|NODE_42_length_87212_cov_19.426655|1|8	BC-0345649514|k141_807	Pisuviricota	GUT_GENOME011995	d__Bacteria;p__Spirochaetota;c__Spirochaetia;o__Treponematales;f__Treponemataceae;g__Treponema_D;s__	24	0	3.09e-05
GUT_GENOME170660|NODE_42_length_87212_cov_19.426655|1|8	SRR11648202|k141_322_flag=0_multi=521.7310_len=1955	Pisuviricota	GUT_GENOME011995	d__Bacteria;p__Spirochaetota;c__Spirochaetia;o__Treponematales;f__Treponemataceae;g__Treponema_D;s__	24	0	3.09e-05
GUT_GENOME170660|NODE_42_length_87212_cov_19.426655|1|8	BC-0345649514|k141_807	Pisuviricota	GUT_GENOME011995	d__Bacteria;p__Spirochaetota;c__Spirochaetia;o__Treponematales;f__Treponemataceae;g__Treponema_D;s__	24	0	3.09e-05
GUT_GENOME170660|NODE_42_length_87212_cov_19.426655|1|8	SRR11450579|k141_236588_flag=1_multi=105.0000_len=8198	Pisuviricota	GUT_GENOME011995	d__Bacteria;p__Spirochaetota;c__Spirochaetia;o__Treponematales;f__Treponemataceae;g__Treponema_D;s__	24	0	3.09e-05
[truncated: 3,588 more rows]
