# Supplementary material for: Diversity and Distinctive Characteristics of the Global RNA Virome in Urban Environments
Source: Research Square preprint supplement (doi:10.21203/rs.3.rs-6735172/v1), 2025-06-26
Supplement: Supplementary file 8 [file 92bda7df111268b4ceff7ca4.xlsx]

## Sheet: Supplementary Table S6
Table S6: World Development Indicators significantly correlated with the abundance of RNA viruses hosted by various organisms. Correlations were calculated using Pearson’s coefficient.
Fungi					Plants					Vertebrates					Invertebrates					Bacteria
Series.Name	Correlation	P-value	Direction	BH-adjusted P-value	Series.Name	Correlation	P-value	Direction	BH-adjusted P-value	Series.Name	Correlation	P-value	Direction	BH-adjusted P-value	Series.Name	Correlation	P-value	Direction	BH-adjusted P-value	Series.Name	Correlation	P-value	Direction	BH-adjusted P-value
Agricultural land (sq. km)	-0.466177	0.0216694	Negative	0.0275329	Land under cereal production (hectares)	-0.457559	0.0281404	Negative	0.0491036	Net errors and omissions (BoP, current US$)	-0.482888	0.0168415	Negative	0.0462058	Agricultural land (% of land area)	-0.45748	0.0245929	Negative	0.0496399	Stocks traded, total value (% of GDP)	-0.499753	0.0487093	Negative	0.0487093
Land under cereal production (hectares)	-0.533068	0.0088154	Negative	0.0156076	Cereal production (metric tons)	-0.418343	0.046966	Negative	0.0499721	Portfolio equity, net inflows (BoP, current US$)	0.448343	0.0319004	Positive	0.0462058	Stocks traded, total value (% of GDP)	-0.506848	0.045103	Negative	0.0496399	Stocks traded, turnover ratio of domestic shares (%)	-0.52873	0.0352306	Negative	0.0484715
Cereal production (metric tons)	-0.509393	0.0130387	Negative	0.0200879	Crop production index (2014-2016 = 100)	-0.465641	0.0218413	Negative	0.0483511	Stocks traded, turnover ratio of domestic shares (%)	0.643578	0.00714528	Positive	0.0462058	Net ODA provided to the least developed countries (% of GNI)	0.683218	0.00499013	Positive	0.0496399	Net ODA provided to the least developed countries (% of GNI)	0.534902	0.0399247	Positive	0.0484715
Livestock production index (2014-2016 = 100)	0.489249	0.0152519	Positive	0.021118	Food production index (2014-2016 = 100)	-0.519747	0.00923785	Negative	0.0451735	Net ODA provided to the least developed countries (% of GNI)	0.612197	0.0152743	Positive	0.0462058	Taxes on goods and services (% value added of industry and services)	0.423316	0.0496399	Positive	0.0496399	CO2 emissions (kg per PPP $ of GDP)	-0.408865	0.0472808	Negative	0.0487093
Net errors and omissions (BoP, current US$)	0.607201	0.0016522	Positive	0.00581458	Communications, computer, etc. (% of service imports, BoP)	0.571233	0.00354978	Positive	0.0361787	CO2 emissions (kt)	0.427569	0.0371505	Positive	0.0462058	Other taxes (% of revenue)	0.541957	0.0135722	Positive	0.0496399	CO2 emissions (kg per 2017 PPP $ of GDP)	-0.408038	0.0477737	Negative	0.0487093
Portfolio equity, net inflows (BoP, current US$)	-0.604904	0.00222936	Negative	0.00581458	Transport services (% of service imports, BoP)	-0.672354	0.000319469	Negative	0.0159734	Total greenhouse gas emissions (kt of CO2 equivalent)	0.418705	0.0417124	Positive	0.0462629	Depth of credit information index (0=low to 8=high)	-0.603641	0.00178929	Negative	0.0411536	Population in the largest city (% of urban population)	0.448118	0.0364791	Positive	0.0484715
CO2 emissions (kt)	-0.588643	0.00247853	Negative	0.00594846	Foreign direct investment, net outflows (% of GDP)	-0.450941	0.0269938	Negative	0.0491036	Aquaculture production (metric tons)	0.504775	0.0118816	Positive	0.0462058	Procedures to register property (number)	-0.430199	0.0358757	Negative	0.0496399	Grants and other revenue (% of revenue)	0.548955	0.0149269	Positive	0.0364879
CO2 emissions (kg per PPP $ of GDP)	-0.410265	0.0464547	Negative	0.0473312	Foreign direct investment, net (BoP, current US$)	0.465509	0.0218836	Positive	0.0483511	Capture fisheries production (metric tons)	0.419803	0.0411246	Positive	0.0462629	School enrollment, primary (% gross)	0.448073	0.0320164	Positive	0.0496399	Social contributions (% of revenue)	-0.569201	0.00880857	Negative	0.0243066
CO2 emissions (kg per 2017 PPP $ of GDP)	-0.423357	0.0392664	Negative	0.0421383	Foreign direct investment, net inflows (BoP, current US$)	-0.414052	0.044277	Negative	0.0499721	Total fisheries production (metric tons)	0.495793	0.013747	Positive	0.0462058	School enrollment, primary, female (% gross)	0.444294	0.0336737	Positive	0.0496399	Other taxes (% of revenue)	0.662067	0.00147252	Positive	0.0243066
Total greenhouse gas emissions (kt of CO2 equivalent)	-0.58101	0.00290838	Negative	0.00654385	Foreign direct investment, net inflows (% of GDP)	-0.634421	0.000869742	Negative	0.0289914	Total reserves (includes gold, current US$)	0.407109	0.0483327	Positive	0.0490147	School enrollment, primary, male (% gross)	0.437081	0.0370247	Positive	0.0496399	Net secondary income (Net current transfers from abroad) (current LCU)	0.453864	0.0296031	Positive	0.0484715
Methane emissions in energy sector (thousand metric tons of CO2 equivalent)	-0.56118	0.00433006	Negative	0.00916826	Portfolio equity, net inflows (BoP, current US$)	-0.498387	0.0155009	Negative	0.0451735	Total reserves minus gold (current US$)	0.420783	0.0406054	Positive	0.0462629	Physicians (per 1,000 people)	0.426318	0.0478757	Positive	0.0496399	Preprimary education, duration (years)	0.433177	0.0389453	Positive	0.0484715
Methane emissions (kt of CO2 equivalent)	-0.508903	0.0110971	Negative	0.018159	Mammal species, threatened	-0.439551	0.0316213	Negative	0.0491036	Other taxes (% of revenue)	0.67731	0.00103564	Positive	0.0210581	Labor force with intermediate education (% of total working-age population with intermediate education)	0.44281	0.0390344	Positive	0.0496399	Employment to population ratio, 15+, male (%) (national estimate)	0.544181	0.00883877	Positive	0.0243066
Agricultural nitrous oxide emissions (thousand metric tons of CO2 equivalent)	-0.493615	0.0142338	Negative	0.020227	Population density (people per sq. km of land area)	-0.432014	0.0350164	Negative	0.0499721	Procedures to register property (number)	-0.405987	0.0490147	Negative	0.0490147	Part time employment, male (% of total male employment)	0.447491	0.0419435	Positive	0.0496399	Labor force with basic education (% of total working-age population with basic education)	0.44765	0.0418617	Positive	0.0484715
Nitrous oxide emissions in energy sector (thousand metric tons of CO2 equivalent)	-0.42699	0.0374359	Negative	0.0412558	Population in urban agglomerations of more than 1 million	-0.425941	0.0480947	Negative	0.0499721	Labor tax and contributions (% of commercial profits)	0.42718	0.0373418	Positive	0.0462058	Unemployment with basic education, female (% of female labor force with basic education)	0.546712	0.0103311	Positive	0.0496399	Labor force participation rate, male (% of male population ages 15+) (national estimate)	0.609945	0.0025776	Positive	0.0243066
Nitrous oxide emissions (thousand metric tons of CO2 equivalent)	-0.547987	0.00556887	Negative	0.0111377	Population in urban agglomerations of more than 1 million (% of total population)	-0.431202	0.0451099	Negative	0.0499721	Industrial design applications, resident, by count	0.492698	0.0169145	Positive	0.0462058	Unemployment with basic education, male (% of male labor force with basic education)	0.495268	0.0224378	Positive	0.0496399	Labor force participation rate, total (% of total population ages 15+) (national estimate)	0.581983	0.00449039	Positive	0.0243066
Population in urban agglomerations of more than 1 million	-0.664222	0.000748124	Negative	0.00493086	Aquaculture production (metric tons)	-0.406491	0.0487073	Negative	0.0499721	Patent applications, residents	0.464763	0.0254551	Positive	0.0462058	Unemployment with basic education (% of total labor force with basic education)	0.54128	0.0112758	Positive	0.0496399	Labor force with intermediate education, male (% of male working-age population with intermediate education)	0.556146	0.00719361	Positive	0.0243066
Aquaculture production (metric tons)	-0.687648	0.000204756	Negative	0.00493086	Total fisheries production (metric tons)	-0.405253	0.0494648	Negative	0.0499721	Trademark applications, resident, by count	0.494871	0.0163628	Positive	0.0462058	International tourism, receipts (% of total exports)	0.584621	0.00856663	Positive	0.0496399	Labor force with intermediate education (% of total working-age population with intermediate education)	0.469505	0.0274855	Positive	0.0484715
Capture fisheries production (metric tons)	-0.596324	0.00210172	Negative	0.00581458	Commercial bank branches (per 100,000 adults)	0.560279	0.00668784	Positive	0.0445856	Container port traffic (TEU: 20 foot equivalent units)	0.466363	0.0248875	Positive	0.0462058	International tourism, expenditures (% of total imports)	0.459661	0.0477014	Positive	0.0496399	Population ages 25-29, female (% of female population)	0.451375	0.0268286	Positive	0.0484715
Total fisheries production (metric tons)	-0.679551	0.000259958	Negative	0.00493086	Grants and other revenue (% of revenue)	-0.470291	0.0421555	Negative	0.0499721	Mobile cellular subscriptions	0.46116	0.0233194	Positive	0.0462058	Food imports (% of merchandise imports)	0.441115	0.0309507	Positive	0.0496399	Population ages 25-29, male (% of male population)	0.474908	0.0190241	Positive	0.041853
Annual freshwater withdrawals, total (billion cubic meters)	-0.566606	0.00481905	Negative	0.00981995	Goods and services expense (% of expense)	-0.445746	0.0376039	Negative	0.0499721	Fixed broadband subscriptions	0.464889	0.0220839	Positive	0.0462058	Merchandise imports from high-income economies (% of total merchandise imports)	0.408954	0.0472277	Positive	0.0496399	Population growth (annual %)	0.440486	0.0312193	Positive	0.0484715
Total reserves (includes gold, current US$)	-0.518222	0.00948249	Negative	0.0160017	Subsidies and other transfers (% of expense)	0.588281	0.00397965	Positive	0.0361787	Gross fixed capital formation (% of GDP)	0.472081	0.0198503	Positive	0.0462058	Merchandise imports from low- and middle-income economies outside region (% of total merchandise imports)	-0.417022	0.0426262	Negative	0.0496399	Population, female (% of total population)	-0.540635	0.00637954	Negative	0.0243066
Total reserves minus gold (current US$)	-0.525538	0.00835584	Negative	0.0150405	Business extent of disclosure index (0=less disclosure to 10=more disclosure)	-0.410962	0.0460479	Negative	0.0499721	Changes in inventories (current US$)	0.455456	0.025317	Positive	0.0462058	Merchandise imports from low- and middle-income economies in Middle East & North Africa (% of total merchandise imports)	-0.412732	0.0450267	Negative	0.0496399	Population, male (% of total population)	0.540623	0.00638088	Positive	0.0243066
Depth of credit information index (0=low to 8=high)	0.441361	0.0308463	Positive	0.036362	Statistical performance indicators (SPI): Overall score (scale 0-100)	0.569031	0.00370963	Positive	0.0361787	Gross capital formation (% of GDP)	0.470154	0.02043	Positive	0.0462058	Fuel exports (% of merchandise exports)	0.414226	0.0441793	Positive	0.0496399
Private credit bureau coverage (% of adults)	0.568717	0.00373294	Positive	0.00806315	Statistical performance indicators (SPI): Pillar 3 data products score (scale 0-100)	0.413675	0.0444901	Positive	0.0499721	Agriculture, forestry, and fishing, value added (current US$)	0.481287	0.0172622	Positive	0.0462058
Labor tax and contributions (% of commercial profits)	-0.406879	0.0484718	Negative	0.0487401	Statistical performance indicators (SPI): Pillar 4 data sources score (scale 0-100)	0.522671	0.00878325	Positive	0.0451735	Agriculture, forestry, and fishing, value added (constant 2015 US$)	0.479983	0.017611	Positive	0.0462058
Industrial design applications, resident, by count	-0.753759	3.2809e-05	Negative	0.00177169	Statistical performance indicators (SPI): Pillar 5 data infrastructure score (scale 0-100)	0.459667	0.0238297	Positive	0.048632	Adjusted savings: carbon dioxide damage (current US$)	0.423907	0.0389845	Positive	0.0462629
Scientific and technical journal articles	-0.474029	0.0192779	Negative	0.0250845	Railways, goods transported (million ton-km)	-0.479635	0.043986	Negative	0.0499721	Adjusted savings: mineral depletion (current US$)	0.449018	0.0277342	Positive	0.0462058
Patent applications, residents	-0.708389	0.00015517	Negative	0.00493086	Railways, passengers carried (million passenger-km)	-0.481223	0.036983	Negative	0.0499721	Adjusted savings: particulate emission damage (current US$)	0.470097	0.0204473	Positive	0.0462058
Trademark applications, resident, by count	-0.759834	2.59911e-05	Negative	0.00177169	Container port traffic (TEU: 20 foot equivalent units)	-0.450201	0.031112	Negative	0.0491036	Adjusted savings: net national savings (current US$)	0.4756	0.018826	Positive	0.0462058
Statistical performance indicators (SPI): Overall score (scale 0-100)	0.463151	0.0226529	Positive	0.0284479	Fixed broadband subscriptions (per 100 people)	0.418491	0.0418277	Positive	0.0499721	Adjusted net savings, including particulate emission damage (current US$)	0.408345	0.0475904	Positive	0.0490147
Statistical performance indicators (SPI): Pillar 2 data services score (scale 0-100)	0.63107	0.000944284	Positive	0.00493086	Households and NPISHs Final consumption expenditure per capita (constant 2015 US$)	0.487764	0.0156116	Positive	0.0451735	Adjusted net savings, excluding particulate emission damage (current US$)	0.410565	0.0462791	Positive	0.0490147
Statistical performance indicators (SPI): Pillar 4 data sources score (scale 0-100)	0.442511	0.030362	Positive	0.036362	Industry (including construction), value added per worker (constant 2015 US$)	0.529419	0.0112834	Positive	0.0451735	Gross savings (% of GDP)	0.408989	0.0472072	Positive	0.0490147
Railways, goods transported (million ton-km)	-0.606045	0.00767668	Negative	0.0140522	Other manufacturing (% of value added in manufacturing)	0.46193	0.0264856	Positive	0.0491036	Primary education, pupils	0.448874	0.0277905	Positive	0.0462058
Railways, passengers carried (million passenger-km)	-0.691793	0.00103317	Negative	0.00493086	Services, value added per worker (constant 2015 US$)	0.46795	0.0211095	Positive	0.0483511	School enrollment, primary (% gross)	0.499528	0.0152292	Positive	0.0462058
Container port traffic (TEU: 20 foot equivalent units)	-0.614975	0.0017909	Negative	0.00581458	Adjusted savings: mineral depletion (current US$)	-0.438482	0.0320862	Negative	0.0491036	School enrollment, primary, female (% gross)	0.522652	0.0105073	Positive	0.0462058
Mobile cellular subscriptions	-0.629759	0.00097489	Negative	0.00493086	Adjusted savings: net national savings (% of GNI)	-0.465631	0.0218446	Negative	0.0483511	School enrollment, primary, male (% gross)	0.453885	0.0295946	Positive	0.0462058
Fixed telephone subscriptions	-0.481302	0.0172583	Negative	0.023011	Adjusted net national income per capita (constant 2015 US$)	0.518541	0.0112446	Positive	0.0451735	Primary education, teachers	0.455731	0.0378736	Positive	0.0462058
Fixed broadband subscriptions	-0.6379	0.000797791	Negative	0.00493086	GNI per capita (constant 2015 US$)	0.551283	0.00782869	Positive	0.0451735	Secondary education, pupils	0.429925	0.0360068	Positive	0.0462058
Armed forces personnel, total	-0.490235	0.015017	Negative	0.0210628	GNI per capita, PPP (constant 2017 international $)	0.551289	0.00782787	Positive	0.0451735	Employment to population ratio, 15+, total (%) (national estimate)	0.418389	0.0469391	Positive	0.0490147
Exports of goods and services (annual % growth)	-0.426876	0.042209	Negative	0.043415	Price level ratio of PPP conversion factor (GDP) to market exchange rate	0.440616	0.0311636	Positive	0.0491036	Labor force, total	0.461948	0.023054	Positive	0.0462058
Gross fixed capital formation (current US$)	-0.494827	0.0139612	Negative	0.020227	Regulatory Quality: Percentile Rank, Upper Bound of 90% Confidence Interval	0.422305	0.0398093	Positive	0.0499721	Unemployment with basic education, female (% of female labor force with basic education)	0.69684	0.000448077	Positive	0.0136664
Gross fixed capital formation (% of GDP)	-0.624787	0.0010989	Negative	0.00493086	Regulatory Quality: Standard Error	0.483616	0.0166531	Positive	0.0451735	Unemployment with basic education, male (% of male labor force with basic education)	0.649051	0.00145558	Positive	0.0221975
Changes in inventories (current US$)	-0.59294	0.00226123	Negative	0.00581458	Primary education, pupils	-0.409273	0.0470388	Negative	0.0499721	Unemployment with basic education (% of total labor force with basic education)	0.698825	0.000424663	Positive	0.0136664
Gross capital formation (current US$)	-0.497377	0.0134016	Negative	0.0200879	Secondary education, duration (years)	0.48165	0.0171659	Positive	0.0451735	Population ages 0-14, female	0.420167	0.0409311	Positive	0.0462629
Gross capital formation (constant 2015 US$)	-0.510297	0.0128515	Negative	0.0200879	Educational attainment, at least Master's or equivalent, population 25+, male (%) (cumulative)	0.585626	0.0171468	Positive	0.0451735	Population ages 0-14, male	0.431471	0.0352718	Positive	0.0462058
Gross capital formation (% of GDP)	-0.634338	0.000871538	Negative	0.00493086	Total alcohol consumption per capita, female (liters of pure alcohol, projected estimates, female 15+ years of age)	0.513048	0.010353	Positive	0.0451735	Population ages 0-14, total	0.426274	0.0377912	Positive	0.0462058
Agriculture, forestry, and fishing, value added (current US$)	-0.664229	0.000400548	Negative	0.00493086	Total alcohol consumption per capita (liters of pure alcohol, projected estimates, 15+ years of age)	0.494987	0.0139256	Positive	0.0451735	Population ages 15-64, female	0.453953	0.0258654	Positive	0.0462058
Agriculture, forestry, and fishing, value added (constant 2015 US$)	-0.662444	0.000420574	Negative	0.00493086	Total alcohol consumption per capita, male (liters of pure alcohol, projected estimates, male 15+ years of age)	0.493644	0.0142272	Positive	0.0451735	Population ages 15-64, male	0.458095	0.0243764	Positive	0.0462058
Manufacturing, value added (current US$)	-0.496564	0.0135779	Negative	0.0200879	Nurses and midwives (per 1,000 people)	0.512594	0.014717	Positive	0.0451735	Population ages 15-64, total	0.456097	0.0250858	Positive	0.0462058
Manufacturing, value added (annual % growth)	0.571204	0.00441435	Positive	0.00916826	Prevalence of current tobacco use, females (% of female adults)	0.541696	0.00625671	Positive	0.0445856	Population ages 65 and above, female	0.435426	0.0334452	Positive	0.0462058
Industry (including construction), value added (current US$)	-0.476953	0.0184441	Negative	0.0242922	Mortality caused by road traffic injury (per 100,000 population)	-0.44636	0.0287848	Negative	0.0491036	Population ages 65 and above, male	0.440258	0.0313169	Positive	0.0462058
Industry (including construction), value added (constant 2015 US$)	-0.500508	0.01274	Negative	0.0200879	Current health expenditure (% of GDP)	0.464404	0.0222415	Positive	0.0483511	Population ages 65 and above, total	0.437642	0.0324555	Positive	0.0462058
Adjusted savings: carbon dioxide damage (current US$)	-0.58331	0.00277264	Negative	0.0064141	Current health expenditure per capita (current US$)	0.490206	0.0150238	Positive	0.0451735	Sex ratio at birth (male births per female births)	0.525936	0.00829775	Positive	0.0462058
Adjusted savings: mineral depletion (current US$)	-0.620354	0.00122062	Negative	0.00493086	Current health expenditure per capita, PPP (current international $)	0.44553	0.0291191	Positive	0.0491036	Population, total	0.450633	0.0271112	Positive	0.0462058
Adjusted savings: energy depletion (current US$)	-0.459559	0.0238669	Negative	0.0292009	Out-of-pocket expenditure per capita (current US$)	0.504381	0.0119589	Positive	0.0451735	Population, female	0.44805	0.0281132	Positive	0.0462058
Adjusted savings: particulate emission damage (current US$)	-0.64024	0.000752321	Negative	0.00493086	Domestic private health expenditure per capita (current US$)	0.460468	0.0235548	Positive	0.048632	Population, male	0.453043	0.0262022	Positive	0.0462058
Adjusted savings: net national savings (current US$)	-0.62717	0.00103786	Negative	0.00493086	Income share held by third 20%	0.463412	0.0456841	Positive	0.0499721	Rural population	0.466395	0.0216	Positive	0.0462058
Adjusted net savings, including particulate emission damage (current US$)	-0.535386	0.00701676	Negative	0.0132949	Survey mean consumption or income per capita, bottom 40% of population (2017 PPP $ per day)	0.530544	0.0194428	Positive	0.0483511	Rural population growth (annual %)	-0.496127	0.0160505	Negative	0.0462058
Adjusted net savings, excluding particulate emission damage (current US$)	-0.53886	0.00658934	Negative	0.0129391	Survey mean consumption or income per capita, total population (2017 PPP $ per day)	0.550945	0.0144938	Positive	0.0451735	Urban population	0.431471	0.0352717	Positive	0.0462058
Coal rents (% of GDP)	-0.46055	0.0235267	Negative	0.0292009	Labor force participation rate, male (% of male population ages 15+) (modeled ILO estimate)	-0.437749	0.0324084	Negative	0.0491036	High-technology exports (current US$)	0.435153	0.033569	Positive	0.0462058
GDP, PPP (current international $)	-0.429161	0.0363746	Negative	0.0412558	Part time employment, female (% of total female employment)	0.453163	0.0391075	Positive	0.0499721	Internally displaced persons, new displacement associated with disasters (number of cases)	0.478552	0.0208884	Positive	0.0462058
GDP, PPP (constant 2017 international $)	-0.424351	0.0387583	Negative	0.0421383	Population ages 0-14, female	-0.405026	0.0496043	Negative	0.0499721
Gross domestic savings (current US$)	-0.52002	0.00919456	Negative	0.0157621	Population ages 0-14, male	-0.407847	0.0478882	Negative	0.0499721
GNI, PPP (current international $)	-0.422016	0.0399592	Negative	0.0421383	Population ages 0-14, total	-0.406603	0.0486391	Negative	0.0499721
Gross savings (current US$)	-0.502607	0.0123116	Negative	0.0198455	Population ages 15-64, female (% of female population)	-0.538236	0.00666447	Negative	0.0445856
Primary education, pupils	-0.620108	0.00122772	Negative	0.00493086	Population ages 15-64, male	-0.404431	0.0499721	Negative	0.0499721
Primary education, teachers	-0.661751	0.00108565	Negative	0.00493086	Population ages 15-64, male (% of male population)	-0.466018	0.0217205	Negative	0.0483511
Secondary education, pupils	-0.600388	0.00192292	Negative	0.00581458	Population ages 15-64 (% of total population)	-0.511573	0.010613	Negative	0.0451735
Secondary education, teachers	-0.593774	0.00735417	Negative	0.013694	Population ages 20-24, male (% of male population)	-0.40985	0.0466985	Negative	0.0499721
Secondary education, teachers, female	-0.583899	0.0109519	Negative	0.018159	Population ages 25-29, female (% of female population)	-0.452457	0.0264209	Negative	0.0491036
Number of deaths ages 20-24 years	-0.42148	0.0402393	Negative	0.0421383	Population ages 25-29, male (% of male population)	-0.506998	0.0114538	Negative	0.0451735
Cause of death, by injury (% of total)	-0.406437	0.0487401	Negative	0.0487401	Population ages 30-34, female (% of female population)	-0.420347	0.0408356	Negative	0.0499721
Women's share of population ages 15+ living with HIV (%)	-0.420835	0.0405776	Negative	0.0421383	Population ages 30-34, male (% of male population)	-0.424617	0.0386237	Negative	0.0499721
Part time employment, male (% of total male employment)	-0.471436	0.030975	Negative	0.036362	Population ages 65 and above, female (% of female population)	0.438813	0.0319419	Positive	0.0491036
Labor force, total	-0.633023	0.00090019	Negative	0.00493086	Population ages 65 and above, male (% of male population)	0.433907	0.0341375	Positive	0.0499721
Unemployment, youth female (% of female labor force ages 15-24) (national estimate)	-0.447273	0.0368768	Negative	0.0412558	Population ages 65 and above (% of total population)	0.439723	0.031547	Positive	0.0491036
Unemployment, youth male (% of male labor force ages 15-24) (national estimate)	-0.508746	0.0156109	Negative	0.0213414	Population ages 70-74, female (% of female population)	0.4237	0.0390903	Positive	0.0499721
Unemployment, youth male (% of male labor force ages 15-24) (modeled ILO estimate)	-0.439138	0.0318004	Negative	0.0369295	Population ages 70-74, male (% of male population)	0.440145	0.0313654	Positive	0.0491036
Unemployment with advanced education, male (% of male labor force with advanced education)	-0.479127	0.0240637	Negative	0.0292009	Population ages 75-79, female (% of female population)	0.43213	0.0349619	Positive	0.0499721
Unemployment with basic education, female (% of female labor force with basic education)	-0.640245	0.00177037	Negative	0.00581458	Population ages 75-79, male (% of male population)	0.440894	0.0310449	Positive	0.0491036
Unemployment with basic education, male (% of male labor force with basic education)	-0.63417	0.00201942	Negative	0.00581458	Population ages 80 and above, female (% of female population)	0.500796	0.0126805	Positive	0.0451735
Unemployment with basic education (% of total labor force with basic education)	-0.639939	0.00178224	Negative	0.00581458	Population ages 80 and above, male (% of male population)	0.515204	0.00998253	Positive	0.0451735
Unemployment, female (% of female labor force) (national estimate)	-0.504109	0.0141774	Negative	0.020227	Age dependency ratio (% of working-age population)	0.485821	0.0160925	Positive	0.0451735
Unemployment, male (% of male labor force) (national estimate)	-0.58649	0.00326754	Negative	0.00720192	Age dependency ratio, old (% of working-age population)	0.461436	0.0232261	Positive	0.048632
Refugee population by country or territory of origin	-0.521443	0.00897184	Negative	0.0156284	Population, female (% of total population)	0.417599	0.0423112	Positive	0.0499721
Population ages 0-14, female	-0.582988	0.00279132	Negative	0.0064141	Population, male (% of total population)	-0.417606	0.0423073	Negative	0.0499721
Population ages 0-14, male	-0.59692	0.00207464	Negative	0.00581458	Rural population	-0.40481	0.0497376	Negative	0.0499721
Population ages 0-14, total	-0.590526	0.00238123	Negative	0.00584485	Tariff rate, applied, weighted mean, primary products (%)	0.466316	0.0249038	Positive	0.0491036
Population ages 15-64, female	-0.625707	0.00107498	Negative	0.00493086	Fuel imports (% of merchandise imports)	-0.430063	0.035941	Negative	0.0499721
Population ages 15-64, male	-0.629699	0.000976314	Negative	0.00493086	ICT goods imports (% total goods imports)	-0.557976	0.00460717	Negative	0.0383931
Population ages 15-64, total	-0.627779	0.00102275	Negative	0.00493086	Computer, communications and other services (% of commercial service imports)	0.609989	0.0015512	Positive	0.0346018
Population ages 65 and above, female	-0.591386	0.00233788	Negative	0.00584485	Transport services (% of commercial service imports)	-0.676169	0.000286596	Negative	0.0159734
Population ages 65 and above, male	-0.597612	0.00204357	Negative	0.00581458	ICT goods exports (% of total goods exports)	-0.408369	0.0475758	Negative	0.0499721
Population ages 65 and above, total	-0.594232	0.00219917	Negative	0.00581458	Merchandise exports to high-income economies (% of total merchandise exports)	0.441914	0.0306126	Positive	0.0491036
Sex ratio at birth (male births per female births)	-0.428131	0.0368751	Negative	0.0412558	Merchandise exports to low- and middle-income economies in East Asia & Pacific (% of total merchandise exports)	-0.414113	0.0442426	Negative	0.0499721
Population, total	-0.619935	0.00123271	Negative	0.00493086	Voice and Accountability: Estimate	0.586019	0.00261975	Positive	0.0346018
Population, female	-0.617013	0.00131986	Negative	0.00509088	Voice and Accountability: Percentile Rank	0.601317	0.00188391	Positive	0.0346018
Population, male	-0.622649	0.00115622	Negative	0.00493086	Voice and Accountability: Percentile Rank, Lower Bound of 90% Confidence Interval	0.583388	0.00276814	Positive	0.0346018
Rural population	-0.63465	0.000864844	Negative	0.00493086	Voice and Accountability: Percentile Rank, Upper Bound of 90% Confidence Interval	0.591126	0.00235088	Positive	0.0346018
Rural population growth (annual %)	0.507466	0.0134448	Positive	0.0200879	Internally displaced persons, new displacement associated with disasters (number of cases)	-0.489793	0.0176759	Negative	0.0453228
Urban population	-0.597914	0.00203014	Negative	0.00581458
International tourism, receipts (% of total exports)	-0.672216	0.00161712	Negative	0.00581458
International tourism, expenditures for travel items (current US$)	-0.486922	0.0158187	Negative	0.0213553
Merchandise imports by the reporting economy, residual (% of total merchandise imports)	-0.422421	0.039749	Negative	0.0421383
Merchandise exports to low- and middle-income economies in Sub-Saharan Africa (% of total merchandise exports)	-0.427674	0.0370989	Negative	0.0412558
High-technology exports (current US$)	-0.536253	0.00690797	Negative	0.0132949
Internally displaced persons, new displacement associated with disasters (number of cases)	-0.664169	0.000547962	Negative	0.00493086
Intentional homicides, male (per 100,000 male)	-0.486839	0.0215744	Negative	0.0275329
