# Supplementary material for: Diversity and Distinctive Characteristics of the Global RNA Virome in Urban Environments
Source: Research Square preprint supplement (doi:10.21203/rs.3.rs-6735172/v1), 2025-06-26
Supplement: Supplementary file 9 [file 95219ca41b4da78995735bd4.xlsx]

## Sheet: Supplementary Table 12
Evaluating Coefficient of Variation of core-viromes' sizes under different prevalence threshold
prevalence threshold (%)	core virome size of built env.	core virome size of non-built	core virome size of water env.	Coefficient of Variation
5	83	44	46	0.380845
10	51	30	35	0.283698
15	41	24	26	0.306316
20	36	18	21	0.385746
30	27	10	14	0.522835
40	17	9	7	0.481046
50	10	8	2	0.6245
