# Supplementary material for: Diversity and Distinctive Characteristics of the Global RNA Virome in Urban Environments
Source: Research Square preprint supplement (doi:10.21203/rs.3.rs-6735172/v1), 2025-06-26
Supplement: Supplementary file 10 [file ae3d47de011fd3a9bb080ce7.xlsx]

## Sheet: Supplementary Table 1
Table S1. Metadata of samples used in this study, including city, country, and environmental type
Sample_id	City or Region	Province	Country	Type	Continent
BC-0332607088	Frederick, MD		United States	Bank	North America
BC-0332607079	Frederick, MD		United States	Bank	North America
BC-0332568357	Frederick, MD		United States	Bank	North America
BC-0332568330	Frederick, MD		United States	Bank	North America
BC-0332568325	Frederick, MD		United States	Bank	North America
BC-0332568311	Frederick, MD		United States	Bank	North America
BC-0332614780	Frederick, MD		United States	Bank	North America
BC-0332614764	Frederick, MD		United States	Bank	North America
BC-0332608790	Frederick, MD		United States	Bank	North America
BC-0332607153	Frederick, MD		United States	Bank	North America
BC-0332607151	Frederick, MD		United States	Bank	North America
BC-0332614728	Frederick, MD		United States	unlabeled buit env.	North America
BC-0332570454	Frederick, MD		United States	Bank	North America
BC-0332613860	Frederick, MD		United States	Bank	North America
BC-0332570441	Frederick, MD		United States	Bank	North America
BC-0332613853	Frederick, MD		United States	Bank	North America
BC-0332570440	Frederick, MD		United States	Bank	North America
BC-0332613845	Frederick, MD		United States	Bank	North America
BC-0332570415	Frederick, MD		United States	Bank	North America
BC-0332613830	Frederick, MD		United States	Bank	North America
BC-0332570398	Frederick, MD		United States	Bank	North America
BC-0332613821	Frederick, MD		United States	Bank	North America
BC-0332570393	Frederick, MD		United States	Bank	North America
BC-0332613813	Frederick, MD		United States	Bank	North America
BC-0332570389	Frederick, MD		United States	Bank	North America
BC-0332613811	Frederick, MD		United States	Bank	North America
BC-0332570383	Frederick, MD		United States	Bank	North America
BC-0332613810	Frederick, MD		United States	Bank	North America
BC-0332570379	Frederick, MD		United States	Bank	North America
BC-0332613802	Frederick, MD		United States	Bank	North America
BC-0332568280	Frederick, MD		United States	Bank	North America
BC-0332614805	Frederick, MD		United States	Bank	North America
BC-0332614800	Frederick, MD		United States	Bank	North America
BC-0332614796	Frederick, MD		United States	Bank	North America
BC-0332614786	Frederick, MD		United States	Bank	North America
BC-0332613790	Frederick, MD		United States	Bank	North America
BC-0332613779	Frederick, MD		United States	Bank	North America
BC-0332613654	Frederick, MD		United States	Bank	North America
BC-0332613618	Frederick, MD		United States	Bank	North America
BC-0332613589	Frederick, MD		United States	Bank	North America
BC-0332568310	Frederick, MD		United States	Bank	North America
BC-0332568303	Frederick, MD		United States	Bank	North America
BC-0332568293	Frederick, MD		United States	Bank	North America
BC-0332568281	Frederick, MD		United States	Bank	North America
BC-0338282508	Tokyo		Japan	Station	East Asia
BC-0338275904	Tokyo		Japan	Station	East Asia
BC-0338282500	Tokyo		Japan	unlabeled buit env.	East Asia
BC-0338275888	Tokyo		Japan	Station	East Asia
BC-0338282494	Tokyo		Japan	Station	East Asia
BC-0338276158	Tokyo		Japan	Station	East Asia
BC-0338275856	Tokyo		Japan	Station	East Asia
BC-0338276149	Tokyo		Japan	Station	East Asia
BC-0338275832	Tokyo		Japan	Station	East Asia
BC-0338276147	Tokyo		Japan	Station	East Asia
BC-0338266589	Tokyo		Japan	unlabeled buit env.	East Asia
BC-0338276132	Tokyo		Japan	Station	East Asia
BC-0338302761	Tokyo		Japan	Station	East Asia
BC-0338302739	Tokyo		Japan	Station	East Asia
BC-0338276128	Tokyo		Japan	unlabeled buit env.	East Asia
BC-0338275887	Tokyo		Japan	Station	East Asia
BC-0338276169	Tokyo		Japan	Station	East Asia
BC-0338275885	Tokyo		Japan	unlabeled buit env.	East Asia
BC-0338276167	Tokyo		Japan	Station	East Asia
BC-0338275864	Tokyo		Japan	Station	East Asia
BC-0345796602	Tubingen		Germany	unlabeled buit env.	Middle Europe
BC-0345796587	Tubingen		Germany	unlabeled buit env.	Middle Europe
BC-0345794092	Tubingen		Germany	unlabeled buit env.	Middle Europe
BC-0345793848	Tubingen		Germany	unlabeled buit env.	Middle Europe
BC-0345792192	Tubingen		Germany	unlabeled buit env.	Middle Europe
BC-0345792139	Tubingen		Germany	unlabeled buit env.	Middle Europe
BC-0345784998	Tubingen		Germany	unlabeled buit env.	Middle Europe
BC-0345807155	Tubingen		Germany	unlabeled buit env.	Middle Europe
BC-0345807140	Tubingen		Germany	unlabeled buit env.	Middle Europe
BC-0345321942	Tubingen		Germany	unlabeled buit env.	Middle Europe
BC-0345321938	Tubingen		Germany	unlabeled buit env.	Middle Europe
BC-0345321864	Tubingen		Germany	unlabeled buit env.	Middle Europe
BC-0345325583	Tubingen		Germany	unlabeled buit env.	Middle Europe
BC-0345321462	Tubingen		Germany	unlabeled buit env.	Middle Europe
BC-0345322242	Tubingen		Germany	unlabeled buit env.	Middle Europe
BC-0345321173	Tubingen		Germany	unlabeled buit env.	Middle Europe
BC-0345322211	Tubingen		Germany	unlabeled buit env.	Middle Europe
BC-0345321168	Tubingen		Germany	unlabeled buit env.	Middle Europe
BC-0345322199	Tubingen		Germany	unlabeled buit env.	Middle Europe
BC-0345322184	Tubingen		Germany	unlabeled buit env.	Middle Europe
BC-0345321147	Tubingen		Germany	unlabeled buit env.	Middle Europe
BC-0345321145	Tubingen		Germany	unlabeled buit env.	Middle Europe
BC-0345322176	Tubingen		Germany	unlabeled buit env.	Middle Europe
BC-0345322173	Tubingen		Germany	unlabeled buit env.	Middle Europe
BC-0345805783	Tubingen		Germany	unlabeled buit env.	Middle Europe
BC-0345805782	Tubingen		Germany	unlabeled buit env.	Middle Europe
BC-0345794107	Tubingen		Germany	unlabeled buit env.	Middle Europe
BC-0345794089	Tubingen		Germany	unlabeled buit env.	Middle Europe
BC-0345793844	Tubingen		Germany	unlabeled buit env.	Middle Europe
BC-0345321871	Tubingen		Germany	unlabeled buit env.	Middle Europe
BC-0345322219	Tubingen		Germany	unlabeled buit env.	Middle Europe
BC-0345322162	Tubingen		Germany	unlabeled buit env.	Middle Europe
BC-0345321115	Tubingen		Germany	unlabeled buit env.	Middle Europe
BC-0345321396	Tubingen		Germany	unlabeled buit env.	Middle Europe
BC-0345322200	Tubingen		Germany	unlabeled buit env.	Middle Europe
BC-0345322158	Tubingen		Germany	unlabeled buit env.	Middle Europe
BC-0345328367	Tubingen		Germany	unlabeled buit env.	Middle Europe
BC-0345312309	Tubingen		Germany	unlabeled buit env.	Middle Europe
BC-0345322196	Tubingen		Germany	unlabeled buit env.	Middle Europe
BC-0345321393	Tubingen		Germany	unlabeled buit env.	Middle Europe
BC-0345322124	Tubingen		Germany	unlabeled buit env.	Middle Europe
BC-0345328326	Tubingen		Germany	unlabeled buit env.	Middle Europe
BC-0345322192	Tubingen		Germany	unlabeled buit env.	Middle Europe
BC-0345321383	Tubingen		Germany	unlabeled buit env.	Middle Europe
BC-0345321935	Tubingen		Germany	unlabeled buit env.	Middle Europe
BC-0345322239	Tubingen		Germany	unlabeled buit env.	Middle Europe
BC-0345322190	Tubingen		Germany	unlabeled buit env.	Middle Europe
BC-0345321189	Tubingen		Germany	unlabeled buit env.	Middle Europe
BC-0345321927	Tubingen		Germany	unlabeled buit env.	Middle Europe
BC-0345322185	Tubingen		Germany	unlabeled buit env.	Middle Europe
BC-0345322229	Tubingen		Germany	unlabeled buit env.	Middle Europe
BC-0345321179	Tubingen		Germany	unlabeled buit env.	Middle Europe
BC-0345321921	Tubingen		Germany	unlabeled buit env.	Middle Europe
BC-0345322226	Tubingen		Germany	unlabeled buit env.	Middle Europe
BC-0345322183	Tubingen		Germany	unlabeled buit env.	Middle Europe
BC-0345321161	Tubingen		Germany	unlabeled buit env.	Middle Europe
BC-0345321917	Tubingen		Germany	unlabeled buit env.	Middle Europe
BC-0345322178	Tubingen		Germany	unlabeled buit env.	Middle Europe
BC-0345322224	Tubingen		Germany	unlabeled buit env.	Middle Europe
BC-0345321914	Tubingen		Germany	unlabeled buit env.	Middle Europe
BC-0345321146	Tubingen		Germany	unlabeled buit env.	Middle Europe
BC-0345322222	Tubingen		Germany	unlabeled buit env.	Middle Europe
BC-0345322170	Tubingen		Germany	unlabeled buit env.	Middle Europe
BC-0345321909	Tubingen		Germany	unlabeled buit env.	Middle Europe
BC-0345321130	Tubingen		Germany	unlabeled buit env.	Middle Europe
BC-0345322220	Tubingen		Germany	unlabeled buit env.	Middle Europe
BC-0345322163	Tubingen		Germany	unlabeled buit env.	Middle Europe
BC-0345321897	Tubingen		Germany	unlabeled buit env.	Middle Europe
BC-0345321116	Tubingen		Germany	unlabeled buit env.	Middle Europe
BC-0345796619	Tubingen		Germany	unlabeled buit env.	Middle Europe
BC-0345792216	Tubingen		Germany	unlabeled buit env.	Middle Europe
BC-0345796581	Tubingen		Germany	unlabeled buit env.	Middle Europe
BC-0345792199	Tubingen		Germany	unlabeled buit env.	Middle Europe
BC-0345792195	Tubingen		Germany	unlabeled buit env.	Middle Europe
BC-0345794125	Tubingen		Germany	unlabeled buit env.	Middle Europe
BC-0345794110	Tubingen		Germany	unlabeled buit env.	Middle Europe
BC-0345322011	Tubingen		Germany	unlabeled buit env.	Middle Europe
BC-0345321975	Tubingen		Germany	unlabeled buit env.	Middle Europe
BC-0345321877	Tubingen		Germany	unlabeled buit env.	Middle Europe
BC-0345321450	Tubingen		Germany	unlabeled buit env.	Middle Europe
BC-0345321123	Tubingen		Germany	unlabeled buit env.	Middle Europe
BC-0345321110	Tubingen		Germany	unlabeled buit env.	Middle Europe
BC-0345805806	Tubingen		Germany	unlabeled buit env.	Middle Europe
BC-0345321107	Tubingen		Germany	unlabeled buit env.	Middle Europe
BC-0345805764	Tubingen		Germany	unlabeled buit env.	Middle Europe
BC-0345794106	Tubingen		Germany	unlabeled buit env.	Middle Europe
BC-0345794085	Tubingen		Germany	unlabeled buit env.	Middle Europe
BC-0345793796	Tubingen		Germany	unlabeled buit env.	Middle Europe
BC-0345792160	Tubingen		Germany	unlabeled buit env.	Middle Europe
BC-0345273701				unlabeled buit env.
BC-0361100980				unlabeled buit env.
BC-0361100856				unlabeled buit env.
BC-0361099260				unlabeled buit env.
BC-0361099254				unlabeled buit env.
BC-0345732144				unlabeled buit env.
BC-0345732070				unlabeled buit env.
BC-0345731594				unlabeled buit env.
BC-0345272403				unlabeled buit env.
BC-0345320549				unlabeled buit env.
BC-0345312843				unlabeled buit env.
BC-0345309238				unlabeled buit env.
BC-0345312875				unlabeled buit env.
BC-0345269318				unlabeled buit env.
BC-0345272386				unlabeled buit env.
BC-0345235144				unlabeled buit env.
BC-0345311503				unlabeled buit env.
BC-0345309234				unlabeled buit env.
BC-0345312874				unlabeled buit env.
BC-0345272381				unlabeled buit env.
BC-0345257130				unlabeled buit env.
BC-0345235143				unlabeled buit env.
BC-0345309287				unlabeled buit env.
BC-0345272362				unlabeled buit env.
BC-0345253252				unlabeled buit env.
BC-0345309225				unlabeled buit env.
BC-0338339401				unlabeled buit env.
BC-0345235134				unlabeled buit env.
BC-0345309268				unlabeled buit env.
BC-0345272359				unlabeled buit env.
BC-0345309220				unlabeled buit env.
BC-0338339367				unlabeled buit env.
BC-0345235182				unlabeled buit env.
BC-0345235111				unlabeled buit env.
BC-0345235180				unlabeled buit env.
BC-0345309207				unlabeled buit env.
BC-0338339334				unlabeled buit env.
BC-0345309266				unlabeled buit env.
BC-0345235106				unlabeled buit env.
BC-0345272350				unlabeled buit env.
BC-0345235177				unlabeled buit env.
BC-0345296512				unlabeled buit env.
BC-0338339324				unlabeled buit env.
BC-0345235095				unlabeled buit env.
BC-0345272339				unlabeled buit env.
BC-0345309261				unlabeled buit env.
BC-0338339297				unlabeled buit env.
BC-0345272428				unlabeled buit env.
BC-0345235168				unlabeled buit env.
BC-0345272338				unlabeled buit env.
BC-0338339454				unlabeled buit env.
BC-0338339249				unlabeled buit env.
BC-0345272420				unlabeled buit env.
BC-0345309249				unlabeled buit env.
BC-0345235167				unlabeled buit env.
BC-0345270888				unlabeled buit env.
BC-0338339240				unlabeled buit env.
BC-0345272419				unlabeled buit env.
BC-0338339440				unlabeled buit env.
BC-0338319383				unlabeled buit env.
BC-0345235164				unlabeled buit env.
BC-0345270499				unlabeled buit env.
BC-0338339438				unlabeled buit env.
BC-0338335248				unlabeled buit env.
BC-0345235163				unlabeled buit env.
BC-0302417563				unlabeled buit env.
BC-0338317228				unlabeled buit env.
BC-0338314356				unlabeled buit env.
BC-0338339415				unlabeled buit env.
BC-0338314319				unlabeled buit env.
BC-0302413665				unlabeled buit env.
BC-0338319866				unlabeled buit env.
BC-0338317225				unlabeled buit env.
BC-0302417436				unlabeled buit env.
BC-0302416284				unlabeled buit env.
BC-0302413652				unlabeled buit env.
BC-0338313527				unlabeled buit env.
BC-0338319388				unlabeled buit env.
BC-0338317208				unlabeled buit env.
BC-0302416097				unlabeled buit env.
BC-0302417423				unlabeled buit env.
BC-0338313306				unlabeled buit env.
BC-0302413622				unlabeled buit env.
BC-0302416065				unlabeled buit env.
BC-0302417398				unlabeled buit env.
BC-0338317183				unlabeled buit env.
BC-0338313272				unlabeled buit env.
BC-0302413517				unlabeled buit env.
BC-0302416041				unlabeled buit env.
BC-0302417387				unlabeled buit env.
BC-0338313266				unlabeled buit env.
BC-0302410142				unlabeled buit env.
BC-0302415899				unlabeled buit env.
BC-0338317170				unlabeled buit env.
BC-0302417259				unlabeled buit env.
BC-0338312162				unlabeled buit env.
BC-0302415823				unlabeled buit env.
BC-0302409943				unlabeled buit env.
BC-0338315749				unlabeled buit env.
BC-0302417222				unlabeled buit env.
BC-0302415002				unlabeled buit env.
BC-0338315748				unlabeled buit env.
BC-0302417625				unlabeled buit env.
BC-0302409744				unlabeled buit env.
BC-0302416465				unlabeled buit env.
BC-0302417624				unlabeled buit env.
BC-0302414985				unlabeled buit env.
BC-0338315738				unlabeled buit env.
BC-0302409728				unlabeled buit env.
BC-0302416451				unlabeled buit env.
BC-0302414956				unlabeled buit env.
BC-0338315724				unlabeled buit env.
BC-0302417583				unlabeled buit env.
BC-0302416290				unlabeled buit env.
BC-0302413689				unlabeled buit env.
BC-0345273283				unlabeled buit env.
BC-0345272455				unlabeled buit env.
BC-0345731839				unlabeled buit env.
BC-0361124410				unlabeled buit env.
BC-0345731444				unlabeled buit env.
BC-0345651333				unlabeled buit env.
BC-0345731435				unlabeled buit env.
BC-0345731834				unlabeled buit env.
BC-0345730641				unlabeled buit env.
BC-0361102984				unlabeled buit env.
BC-0345649844				unlabeled buit env.
BC-0345731813				unlabeled buit env.
BC-0345731431				unlabeled buit env.
BC-0345651313				unlabeled buit env.
BC-0345730639				unlabeled buit env.
BC-0345325529				unlabeled buit env.
BC-0345649620				unlabeled buit env.
BC-0345731428				unlabeled buit env.
BC-0345731600				unlabeled buit env.
BC-0345651186				unlabeled buit env.
BC-0345730637				unlabeled buit env.
BC-0345325526				unlabeled buit env.
BC-0345731417				unlabeled buit env.
BC-0345649444				unlabeled buit env.
BC-0345730634				unlabeled buit env.
BC-0345322437				unlabeled buit env.
BC-0345318096				unlabeled buit env.
BC-0345651179				unlabeled buit env.
BC-0345731414				unlabeled buit env.
BC-0345649213				unlabeled buit env.
BC-0345730613				unlabeled buit env.
BC-0345651134				unlabeled buit env.
BC-0345318091				unlabeled buit env.
BC-0345322110				unlabeled buit env.
BC-0345730829				unlabeled buit env.
BC-0345649092				unlabeled buit env.
BC-0345724924				unlabeled buit env.
BC-0345318074				unlabeled buit env.
BC-0345320671				unlabeled buit env.
BC-0345651066				unlabeled buit env.
BC-0345649084				unlabeled buit env.
BC-0345730809				unlabeled buit env.
BC-0345723321				unlabeled buit env.
BC-0345650560				unlabeled buit env.
BC-0345312929				unlabeled buit env.
BC-0345730657				unlabeled buit env.
BC-0345320670				unlabeled buit env.
BC-0345606420				unlabeled buit env.
BC-0345650138				unlabeled buit env.
BC-0345722559				unlabeled buit env.
BC-0345312926				unlabeled buit env.
BC-0345320614				unlabeled buit env.
BC-0345312866				unlabeled buit env.
BC-0345650095				unlabeled buit env.
BC-0345597676				unlabeled buit env.
BC-0345651372				unlabeled buit env.
BC-0345312905				unlabeled buit env.
BC-0345320612				unlabeled buit env.
BC-0345312856				unlabeled buit env.
BC-0345597661				unlabeled buit env.
BC-0345312890				unlabeled buit env.
BC-0345651347				unlabeled buit env.
BC-0345649926				unlabeled buit env.
BC-0345320559				unlabeled buit env.
BC-0345312854				unlabeled buit env.
BC-0345309241				unlabeled buit env.
BC-0345312878				unlabeled buit env.
BC-0345325547				unlabeled buit env.
BC-0345272656				unlabeled buit env.
BC-0345270841				unlabeled buit env.
BC-0345732147				unlabeled buit env.
BC-0361099262				unlabeled buit env.
BC-0345731776				unlabeled buit env.
BC-0361099242				unlabeled buit env.
BC-0345732080				unlabeled buit env.
BC-0361099189				unlabeled buit env.
BC-0345731404				unlabeled buit env.
BC-0345730818				unlabeled buit env.
BC-0345731814				unlabeled buit env.
BC-0345702199				unlabeled buit env.
BC-0345730700				unlabeled buit env.
BC-0345731792				unlabeled buit env.
BC-0345320606				unlabeled buit env.
BC-0345320665				unlabeled buit env.
BC-0345322057				unlabeled buit env.
BC-0345320552				unlabeled buit env.
BC-0345321175				unlabeled buit env.
BC-0345320648				unlabeled buit env.
BC-0345312891				unlabeled buit env.
BC-0345312873				unlabeled buit env.
BC-0345312915				unlabeled buit env.
BC-0345309245				unlabeled buit env.
BC-0345312858				unlabeled buit env.
BC-0345309239				unlabeled buit env.
BC-0345309272				unlabeled buit env.
BC-0345309221				unlabeled buit env.
BC-0345309237				unlabeled buit env.
BC-0345309196				unlabeled buit env.
BC-0345273217				unlabeled buit env.
BC-0345272399				unlabeled buit env.
BC-0345272396				unlabeled buit env.
BC-0345272478				unlabeled buit env.
BC-0345272427				unlabeled buit env.
BC-0345296511				unlabeled buit env.
BC-0345273737				unlabeled buit env.
BC-0345272410				unlabeled buit env.
BC-0345272371				unlabeled buit env.
BC-0345273271				unlabeled buit env.
BC-0345272402				unlabeled buit env.
BC-0345272342				unlabeled buit env.
BC-0345270855				unlabeled buit env.
BC-0345272364				unlabeled buit env.
BC-0345272351				unlabeled buit env.
BC-0345235170				unlabeled buit env.
BC-0345235185				unlabeled buit env.
BC-0345270868				unlabeled buit env.
BC-0345270222				unlabeled buit env.
BC-0345235136				unlabeled buit env.
BC-0345270861				unlabeled buit env.
BC-0345235152				unlabeled buit env.
BC-0338339479				unlabeled buit env.
BC-0345232869				unlabeled buit env.
BC-0345232846				unlabeled buit env.
BC-0338314349				unlabeled buit env.
BC-0338313271				unlabeled buit env.
BC-0338317219				unlabeled buit env.
BC-0338315714				unlabeled buit env.
BC-0338317203				unlabeled buit env.
BC-0332773697				unlabeled buit env.
BC-0338317191				unlabeled buit env.
BC-0345730633				unlabeled buit env.
BC-0345651345				unlabeled buit env.
BC-0345651141				unlabeled buit env.
BC-0345650350				unlabeled buit env.
BC-0345650305				unlabeled buit env.
BC-0345649544				unlabeled buit env.
BC-0345650283				unlabeled buit env.
BC-0345650188				unlabeled buit env.
BC-0345649726				unlabeled buit env.
BC-0345649216				unlabeled buit env.
BC-0345320623				unlabeled buit env.
BC-0338314310				unlabeled buit env.
BC-0338317186				unlabeled buit env.
BC-0302416293				unlabeled buit env.
BC-0302416291				unlabeled buit env.
BC-0302417269				unlabeled buit env.
BC-0302416460				unlabeled buit env.
BC-0302417440				unlabeled buit env.
BC-0302417627				unlabeled buit env.
BC-0302417253				unlabeled buit env.
BC-0302416402				unlabeled buit env.
BC-0302416064				unlabeled buit env.
BC-0302413542				unlabeled buit env.
BC-0302414954				unlabeled buit env.
BC-0302416063				unlabeled buit env.
BC-0302407946				unlabeled buit env.
BC-0302416039				unlabeled buit env.
BC-0302409618				unlabeled buit env.
BC-0302413523				unlabeled buit env.
BC-0302409575				unlabeled buit env.
BC-0302408226				unlabeled buit env.
BC-0302415032				unlabeled buit env.
BC-0338339248				unlabeled buit env.
BC-0338339295				unlabeled buit env.
BC-0338339469				unlabeled buit env.
BC-0338339218				unlabeled buit env.
BC-0338339362				unlabeled buit env.
BC-0338339289				unlabeled buit env.
BC-0338339485				unlabeled buit env.
BC-0338339417				unlabeled buit env.
BC-0338320008				unlabeled buit env.
BC-0338339286				unlabeled buit env.
BC-0345272609				unlabeled buit env.
BC-0345270893				unlabeled buit env.
BC-0345273215				unlabeled buit env.
BC-0345270848				unlabeled buit env.
BC-0345273202				unlabeled buit env.
BC-0345270838				unlabeled buit env.
BC-0345272561				unlabeled buit env.
BC-0345272595				unlabeled buit env.
BC-0345271661				unlabeled buit env.
BC-0345270878				unlabeled buit env.
BC-0345270823				unlabeled buit env.
BC-0338336980				unlabeled buit env.
BC-0338319325				unlabeled buit env.
BC-0338318878				unlabeled buit env.
BC-0338314965				unlabeled buit env.
Neg_run1Poland				unlabeled buit env.
BC-0332774048				unlabeled buit env.
BC-0332607140				unlabeled buit env.
BC-0332571810				unlabeled buit env.
BC-0332767787				unlabeled buit env.
BC-0345272425				unlabeled buit env.
BC-0332605259				unlabeled buit env.
BC-0332575612				unlabeled buit env.
BC-0332575395				unlabeled buit env.
BC-0332766376				unlabeled buit env.
BC-0332575393				unlabeled buit env.
BC-0332575299				unlabeled buit env.
BC-0332761816				unlabeled buit env.
BC-0332761794				unlabeled buit env.
BC-0332761757				unlabeled buit env.
BC-0332773415				unlabeled buit env.
BC-0302386497				unlabeled buit env.
BC-0332552628				unlabeled buit env.
BC-0302386425				unlabeled buit env.
BC-0332771732				unlabeled buit env.
BC-0332771096				unlabeled buit env.
BC-0332769390				unlabeled buit env.
BC-0332570922				unlabeled buit env.
BC-0306559462				unlabeled buit env.
BC-0332613947				unlabeled buit env.
BC-0332773183				unlabeled buit env.
BC-0332570465				unlabeled buit env.
BC-0302382673				unlabeled buit env.
BC-0302372746				unlabeled buit env.
BC-0332572632				unlabeled buit env.
BC-0247294223				unlabeled buit env.
BC-0338275878				unlabeled buit env.
BC-0247293598				unlabeled buit env.
BC-0338275852				unlabeled buit env.
BC-0332572340				unlabeled buit env.
BC-0332571073				unlabeled buit env.
BC-0332615161				unlabeled buit env.
BC-0332615144				unlabeled buit env.
BC-0332573488				unlabeled buit env.
BC-0332573472				unlabeled buit env.
BC-0247293332				unlabeled buit env.
BC-0332570156				unlabeled buit env.
BC-0332609380				unlabeled buit env.
BC-0332772768				unlabeled buit env.
BC-0332771833				unlabeled buit env.
BC-0332609036				unlabeled buit env.
BC-0332773302				unlabeled buit env.
BC-0332637058				unlabeled buit env.
BC-0332571347				unlabeled buit env.
BC-0332615189				unlabeled buit env.
BC-0332573540				unlabeled buit env.
BC-0302416036	Vancouver		Canada	unlabeled buit env.	North America
BC-0302413546	Vancouver		Canada	unlabeled buit env.	North America
BC-0302417248	Vancouver		Canada	unlabeled buit env.	North America
BC-0302416022	Vancouver		Canada	unlabeled buit env.	North America
BC-0302417220	Vancouver		Canada	unlabeled buit env.	North America
BC-0302413540	Vancouver		Canada	unlabeled buit env.	North America
BC-0302416013	Vancouver		Canada	unlabeled buit env.	North America
BC-0302413538	Vancouver		Canada	unlabeled buit env.	North America
BC-0302417215	Vancouver		Canada	unlabeled buit env.	North America
BC-0302415877	Vancouver		Canada	unlabeled buit env.	North America
BC-0302417954	Vancouver		Canada	unlabeled buit env.	North America
BC-0302413528	Vancouver		Canada	unlabeled buit env.	North America
BC-0302416459	Vancouver		Canada	unlabeled buit env.	North America
BC-0302417617	Vancouver		Canada	unlabeled buit env.	North America
BC-0302415808	Vancouver		Canada	unlabeled buit env.	North America
BC-0302416103	Vancouver		Canada	unlabeled buit env.	North America
BC-0302410119	Vancouver		Canada	unlabeled buit env.	North America
BC-0302417447	Vancouver		Canada	unlabeled buit env.	North America
BC-0302416070	Vancouver		Canada	unlabeled buit env.	North America
BC-0302406874	Vancouver		Canada	unlabeled buit env.	North America
BC-0302413588	Vancouver		Canada	unlabeled buit env.	North America
BC-0345649832	Vancouver		Canada	unlabeled buit env.	North America
BC-0345649273	Vancouver		Canada	unlabeled buit env.	North America
BC-0345650630	Vancouver		Canada	unlabeled buit env.	North America
BC-0345649830	Vancouver		Canada	unlabeled buit env.	North America
BC-0345653811	Vancouver		Canada	unlabeled buit env.	North America
BC-0345650604	Vancouver		Canada	unlabeled buit env.	North America
BC-0345649790	Vancouver		Canada	unlabeled buit env.	North America
BC-0345650600	Vancouver		Canada	unlabeled buit env.	North America
BC-0345650348	Vancouver		Canada	unlabeled buit env.	North America
BC-0345649586	Vancouver		Canada	unlabeled buit env.	North America
BC-0345649571	Vancouver		Canada	unlabeled buit env.	North America
BC-0345650324	Vancouver		Canada	unlabeled buit env.	North America
BC-0345650299	Vancouver		Canada	unlabeled buit env.	North America
BC-0345649295	Vancouver		Canada	unlabeled buit env.	North America
BC-0345649836	Vancouver		Canada	unlabeled buit env.	North America
BC-0345649277	Vancouver		Canada	unlabeled buit env.	North America
BC-0302417410	Vancouver		Canada	University	North America
BC-0302416467	Vancouver		Canada	University	North America
BC-0302417612	Vancouver		Canada	University	North America
BC-0302417379	Vancouver		Canada	University	North America
BC-0302417562	Vancouver		Canada	University	North America
BC-0302416464	Vancouver		Canada	University	North America
BC-0302417550	Vancouver		Canada	University	North America
BC-0302416249	Vancouver		Canada	University	North America
BC-0302417267	Vancouver		Canada	University	North America
BC-0302417640	Vancouver		Canada	University	North America
BC-0302416435	Vancouver		Canada	University	North America
BC-0302416226	Vancouver		Canada	University	North America
BC-0302417425	Vancouver		Canada	University	North America
BC-0302410057	Vancouver		Canada	University	North America
BC-0302413525	Vancouver		Canada	University	North America
BC-0302413687	Vancouver		Canada	University	North America
BC-0302413675	Vancouver		Canada	University	North America
BC-0302415048	Vancouver		Canada	University	North America
BC-0302413570	Vancouver		Canada	University	North America
BC-0302415036	Vancouver		Canada	University	North America
BC-0302413555	Vancouver		Canada	University	North America
BC-0302408155	Vancouver		Canada	University	North America
BC-0345650629	Vancouver		Canada	unlabeled buit env.	North America
BC-0345653812	Vancouver		Canada	unlabeled buit env.	North America
BC-0345651079	Vancouver		Canada	unlabeled buit env.	North America
BC-0345650336	Vancouver		Canada	unlabeled buit env.	North America
BC-0345653724	Vancouver		Canada	unlabeled buit env.	North America
BC-0345650623	Vancouver		Canada	unlabeled buit env.	North America
BC-0345651059	Vancouver		Canada	unlabeled buit env.	North America
BC-0345650330	Vancouver		Canada	unlabeled buit env.	North America
BC-0345649292	Vancouver		Canada	unlabeled buit env.	North America
BC-0345649907	Vancouver		Canada	unlabeled buit env.	North America
BC-0345649020	Vancouver		Canada	unlabeled buit env.	North America
BC-0345650631	Vancouver		Canada	unlabeled buit env.	North America
BC-0345649824	Vancouver		Canada	unlabeled buit env.	North America
BC-0345650341	Vancouver		Canada	unlabeled buit env.	North America
BC-0345649268	Vancouver		Canada	unlabeled buit env.	North America
BC-0345649882	Vancouver		Canada	unlabeled buit env.	North America
BC-0345649017	Vancouver		Canada	unlabeled buit env.	North America
BC-0345649786	Vancouver		Canada	unlabeled buit env.	North America
BC-0345649257	Vancouver		Canada	unlabeled buit env.	North America
BC-0345607294	Vancouver		Canada	unlabeled buit env.	North America
BC-0345649550	Vancouver		Canada	unlabeled buit env.	North America
BC-0345649255	Vancouver		Canada	unlabeled buit env.	North America
BC-0345604640	Vancouver		Canada	unlabeled buit env.	North America
BC-0345649540	Vancouver		Canada	unlabeled buit env.	North America
BC-0345649249	Vancouver		Canada	unlabeled buit env.	North America
BC-0345649523	Vancouver		Canada	unlabeled buit env.	North America
BC-0345649108	Vancouver		Canada	unlabeled buit env.	North America
BC-0345649520	Vancouver		Canada	unlabeled buit env.	North America
BC-0345649107	Vancouver		Canada	unlabeled buit env.	North America
BC-0345649514	Vancouver		Canada	unlabeled buit env.	North America
BC-0345649106	Vancouver		Canada	unlabeled buit env.	North America
BC-0345649095	Vancouver		Canada	unlabeled buit env.	North America
BC-0345649297	Vancouver		Canada	unlabeled buit env.	North America
BC-0345649055	Vancouver		Canada	unlabeled buit env.	North America
BC-0345650602	Vancouver		Canada	unlabeled buit env.	North America
BC-0345651058	Vancouver		Canada	unlabeled buit env.	North America
BC-0345650325	Vancouver		Canada	unlabeled buit env.	North America
BC-0345650593	Vancouver		Canada	unlabeled buit env.	North America
BC-0345650302	Vancouver		Canada	unlabeled buit env.	North America
BC-0345651039	Vancouver		Canada	unlabeled buit env.	North America
BC-0345652487	Vancouver		Canada	unlabeled buit env.	North America
BC-0345650576	Vancouver		Canada	unlabeled buit env.	North America
BC-0345650275	Vancouver		Canada	unlabeled buit env.	North America
BC-0345651009	Vancouver		Canada	unlabeled buit env.	North America
BC-0345652283	Vancouver		Canada	unlabeled buit env.	North America
BC-0345650562	Vancouver		Canada	unlabeled buit env.	North America
BC-0345650553	Vancouver		Canada	unlabeled buit env.	North America
BC-0345649934	Vancouver		Canada	unlabeled buit env.	North America
BC-0345650352	Vancouver		Canada	unlabeled buit env.	North America
BC-0345649930	Vancouver		Canada	unlabeled buit env.	North America
BC-0345649851	Vancouver		Canada	unlabeled buit env.	North America
BC-0345650346	Vancouver		Canada	unlabeled buit env.	North America
BC-0345649643	Vancouver		Canada	unlabeled buit env.	North America
BC-0345649555	Vancouver		Canada	unlabeled buit env.	North America
BC-0345649347	Vancouver		Canada	unlabeled buit env.	North America
BC-0345649338	Vancouver		Canada	unlabeled buit env.	North America
BC-0345649588	Vancouver		Canada	unlabeled buit env.	North America
SRR17497089	Weifang	Shandong	China	Game animal	East Asia
SRR17481225	Weifang	Shandong	China	Game animal	East Asia
SRR17481222	Weifang	Shandong	China	Game animal	East Asia
SRR17481221	Weifang	Shandong	China	Game animal	East Asia
SRR17481220	Weifang	Shandong	China	Game animal	East Asia
SRR17481219	Weifang	Shandong	China	Game animal	East Asia
SRR17481218	Weifang	Shandong	China	Game animal	East Asia
SRR17481216	Weifang	Shandong	China	Game animal	East Asia
SRR17481215	Weifang	Shandong	China	Game animal	East Asia
SRR17481214	Weifang	Shandong	China	Game animal	East Asia
SRR17481213	Weifang	Shandong	China	Game animal	East Asia
SRR17509935	Weifang	Shandong	China	Game animal	East Asia
SRR17509934	Weifang	Shandong	China	Game animal	East Asia
SRR17509965	Wenzhou	Zhejiang	China	Game animal	East Asia
SRR17497045	Wenzhou	Zhejiang	China	Game animal	East Asia
SRR17481246	Wenzhou	Zhejiang	China	Game animal	East Asia
SRR17509910	Wenzhou	Zhejiang	China	Game animal	East Asia
SRR17497071	Wuwei	Gansu	China	Game animal	East Asia
SRR17497070	Wuwei	Gansu	China	Game animal	East Asia
SRR17509975	Xinyang	Henan	China	Game animal	East Asia
SRR17509974	Xinyang	Henan	China	Game animal	East Asia
SRR11679974	Yellowstone National Park	Wyoming	United States	Greenhouse	North America
SRR11680807	Yellowstone National Park	Wyoming	United States	Greenhouse	North America
SRR11682242	Yellowstone National Park	Wyoming	United States	Greenhouse	North America
SRR11682243	Yellowstone National Park	Wyoming	United States	Greenhouse	North America
SRR11685468	Yellowstone National Park	Wyoming	United States	Greenhouse	North America
SRR11687718	Yellowstone National Park	Wyoming	United States	Greenhouse	North America
SRR11687968	Yellowstone National Park	Wyoming	United States	Greenhouse	North America
SRR11692737	Yellowstone National Park	Wyoming	United States	Greenhouse	North America
SRR11694843	Yellowstone National Park	Wyoming	United States	Greenhouse	North America
SRR11694844	Yellowstone National Park	Wyoming	United States	Greenhouse	North America
SRR11694845	Yellowstone National Park	Wyoming	United States	Greenhouse	North America
SRR11694889	Yellowstone National Park	Wyoming	United States	Greenhouse	North America
SRR11695891	Yellowstone National Park	Wyoming	United States	Greenhouse	North America
SRR12912511	Yellowstone National Park	Wyoming	United States	Greenhouse	North America
SRR12914254	Yellowstone National Park	Wyoming	United States	Greenhouse	North America
SRR12914282	Yellowstone National Park	Wyoming	United States	Greenhouse	North America
SRR12916654	Yellowstone National Park	Wyoming	United States	Greenhouse	North America
SRR12916655	Yellowstone National Park	Wyoming	United States	Greenhouse	North America
SRR12916656	Yellowstone National Park	Wyoming	United States	Greenhouse	North America
SRR12916667	Yellowstone National Park	Wyoming	United States	Greenhouse	North America
SRR12916668	Yellowstone National Park	Wyoming	United States	Greenhouse	North America
SRR13717004	Yellowstone National Park	Wyoming	United States	Freshwater	North America
SRR13717121	Yellowstone National Park	Wyoming	United States	Freshwater	North America
SRR13717128	Yellowstone National Park	Wyoming	United States	Freshwater	North America
SRR13717139	Yellowstone National Park	Wyoming	United States	Freshwater	North America
SRR13717490	Yellowstone National Park	Wyoming	United States	Freshwater	North America
SRR13717522	Yellowstone National Park	Wyoming	United States	Freshwater	North America
SRR13717874	Yellowstone National Park	Wyoming	United States	Freshwater	North America
SRR13717876	Yellowstone National Park	Wyoming	United States	Freshwater	North America
SRR13718861	Yellowstone National Park	Wyoming	United States	Freshwater	North America
SRR13719296	Yellowstone National Park	Wyoming	United States	Freshwater	North America
SRR13723917	Yellowstone National Park	Wyoming	United States	Freshwater	North America
SRR13724283	Yellowstone National Park	Wyoming	United States	Freshwater	North America
SRR13724754	Yellowstone National Park	Wyoming	United States	Freshwater	North America
SRR13755575	Yellowstone National Park	Wyoming	United States	Freshwater	North America
SRR18697447	Yellowstone National Park	Wyoming	United States	Hot spring	North America
SRR5204522	Amazon Forest		Brazil	tropical peat soil	South America
SRR5204524	Amazon Forest		Brazil	tropical peat soil	South America
SRR5262385	Amazon Forest		Brazil	tropical peat soil	South America
SRR5262386	Amazon Forest		Brazil	tropical peat soil	South America
SRR5263924	Amazon Forest		Brazil	tropical peat soil	South America
SRR8526271	Amazon Forest		Brazil	tropical peat soil	South America
SRR8526272	Amazon Forest		Brazil	tropical peat soil	South America
SRR8526273	Amazon Forest		Brazil	tropical peat soil	South America
SRR5208451	Arctic		Arctic	Permafrost soil	Arctic
SRR5208454	Arctic		Arctic	Permafrost soil	Arctic
SRR5208455	Arctic		Arctic	Permafrost soil	Arctic
SRR5208541	Arctic		Arctic	Permafrost soil	Arctic
SRR5208544	Arctic		Arctic	Permafrost soil	Arctic
SRR5208545	Arctic		Arctic	Permafrost soil	Arctic
SRR11647857	Baltic Sea		Sweden	Sediment	Northern Europe
SRR11647858	Baltic Sea		Sweden	Sediment	Northern Europe
SRR11647877	Baltic Sea		Sweden	Sediment	Northern Europe
SRR11647985	Baltic Sea		Sweden	Sediment	Northern Europe
SRR11647991	Baltic Sea		Sweden	Sediment	Northern Europe
SRR11648140	Baltic Sea		Sweden	Sediment	Northern Europe
SRR11648162	Baltic Sea		Sweden	Sediment	Northern Europe
SRR11648168	Baltic Sea		Sweden	Sediment	Northern Europe
SRR11648176	Baltic Sea		Sweden	Sediment	Northern Europe
SRR11648202	Baltic Sea		Sweden	Sediment	Northern Europe
SRR11648205	Baltic Sea		Sweden	Sediment	Northern Europe
SRR11648359	Baltic Sea		Sweden	Sediment	Northern Europe
SRR11648360	Baltic Sea		Sweden	Sediment	Northern Europe
SRR11648382	Baltic Sea		Sweden	Sediment	Northern Europe
SRR11648383	Baltic Sea		Sweden	Sediment	Northern Europe
SRR11648395	Baltic Sea		Sweden	Sediment	Northern Europe
SRR11648412	Baltic Sea		Sweden	Sediment	Northern Europe
SRR11648413	Baltic Sea		Sweden	Sediment	Northern Europe
SRR11648415	Baltic Sea		Sweden	Sediment	Northern Europe
SRR11648440	Baltic Sea		Sweden	Sediment	Northern Europe
SRR11649087	Baltic Sea		Sweden	Sediment	Northern Europe
SRR11649088	Baltic Sea		Sweden	Sediment	Northern Europe
SRR11649133	Baltic Sea		Sweden	Sediment	Northern Europe
SRR11649134	Baltic Sea		Sweden	Sediment	Northern Europe
SRR12685007	Baltic Sea		Sweden	Sediment	Northern Europe
SRR12685017	Baltic Sea		Sweden	Sediment	Northern Europe
SRR12685024	Baltic Sea		Sweden	Sediment	Northern Europe
SRR12685025	Baltic Sea		Sweden	Sediment	Northern Europe
SRR12685050	Baltic Sea		Sweden	Sediment	Northern Europe
SRR12685051	Baltic Sea		Sweden	Sediment	Northern Europe
SRR12685052	Baltic Sea		Sweden	Sediment	Northern Europe
SRR12685203	Baltic Sea		Sweden	Sediment	Northern Europe
SRR12685204	Baltic Sea		Sweden	Sediment	Northern Europe
SRR12685210	Baltic Sea		Sweden	Sediment	Northern Europe
SRR12685680	Baltic Sea		Sweden	Sediment	Northern Europe
SRR12685681	Baltic Sea		Sweden	Sediment	Northern Europe
SRR12685792	Baltic Sea		Sweden	Sediment	Northern Europe
SRR12685793	Baltic Sea		Sweden	Sediment	Northern Europe
SRR12686088	Baltic Sea		Sweden	Sediment	Northern Europe
SRR12686098	Baltic Sea		Sweden	Sediment	Northern Europe
SRR12686099	Baltic Sea		Sweden	Sediment	Northern Europe
SRR13696271	Baltic Sea		Sweden	Sediment	Northern Europe
BC-0332570020	Baltimore, MD		United States	Hospital	North America
BC-0332569995	Baltimore, MD		United States	Hospital	North America
BC-0332573862	Baltimore, MD		United States	Hospital	North America
BC-0332569991	Baltimore, MD		United States	Hospital	North America
BC-0332573854	Baltimore, MD		United States	Hospital	North America
BC-0332573845	Baltimore, MD		United States	Hospital	North America
BC-0332573844	Baltimore, MD		United States	Hospital	North America
BC-0332572950	Baltimore, MD		United States	Hospital	North America
BC-0332572925	Baltimore, MD		United States	Hospital	North America
BC-0332570037	Baltimore, MD		United States	Hospital	North America
BC-0332572565	Baltimore, MD		United States	Hospital	North America
BC-0247292800	Baltimore, MD		United States	Hospital	North America
BC-0332572537	Baltimore, MD		United States	Hospital	North America
BC-0247292798	Baltimore, MD		United States	Hospital	North America
BC-0332572536	Baltimore, MD		United States	Hospital	North America
BC-0247290436	Baltimore, MD		United States	Hospital	North America
BC-0247290208	Baltimore, MD		United States	Hospital	North America
BC-0332572503	Baltimore, MD		United States	Hospital	North America
BC-0247284151	Baltimore, MD		United States	Hospital	North America
BC-0332570054	Baltimore, MD		United States	Hospital	North America
BC-0247284139	Baltimore, MD		United States	Hospital	North America
BC-0332570045	Baltimore, MD		United States	Hospital	North America
SRR17509960	Baoding	Hebei	China	Game animal	East Asia
SRR17497060	Baoding	Hebei	China	Game animal	East Asia
SRR17509959	Baoding	Hebei	China	Game animal	East Asia
SRR17497059	Baoding	Hebei	China	Game animal	East Asia
SRR17497058	Baoding	Hebei	China	Game animal	East Asia
SRR17481232	Baoding	Hebei	China	Game animal	East Asia
BC-0306558054	Berlin		Germany	Station	Middle Europe
BC-0302411039	Berlin		Germany	Station	Middle Europe
BC-0306558049	Berlin		Germany	Station	Middle Europe
BC-0306558046	Berlin		Germany	Station	Middle Europe
BC-0306557932	Berlin		Germany	Station	Middle Europe
BC-0306557911	Berlin		Germany	Station	Middle Europe
BC-0306557909	Berlin		Germany	Station	Middle Europe
BC-0306557904	Berlin		Germany	Station	Middle Europe
BC-0306557899	Berlin		Germany	Station	Middle Europe
BC-0302412883	Berlin		Germany	Station	Middle Europe
BC-0306557896	Berlin		Germany	Station	Middle Europe
BC-0306557861	Berlin		Germany	Station	Middle Europe
BC-0306557831	Berlin		Germany	Station	Middle Europe
BC-0306557815	Berlin		Germany	Station	Middle Europe
BC-0306557769	Berlin		Germany	Station	Middle Europe
BC-0306557753	Berlin		Germany	Station	Middle Europe
BC-0306557738	Berlin		Germany	Station	Middle Europe
BC-0302410476	Berlin		Germany	Station	Middle Europe
BC-0306557712	Berlin		Germany	Station	Middle Europe
BC-0306558338	Berlin		Germany	Station	Middle Europe
BC-0306558337	Berlin		Germany	Station	Middle Europe
BC-0306558332	Berlin		Germany	Station	Middle Europe
BC-0302411041	Berlin		Germany	Station	Middle Europe
BC-0302385563	Berlin		Germany	Station	Middle Europe
BC-0302384208	Berlin		Germany	Station	Middle Europe
BC-0306559428	Berlin		Germany	Station	Middle Europe
BC-0302384150	Berlin		Germany	Station	Middle Europe
BC-0306559416	Berlin		Germany	Station	Middle Europe
BC-0306559403	Berlin		Germany	Station	Middle Europe
BC-0306558602	Berlin		Germany	Station	Middle Europe
BC-0302413923	Berlin		Germany	Station	Middle Europe
BC-0306558577	Berlin		Germany	Station	Middle Europe
BC-0302411104	Berlin		Germany	Station	Middle Europe
BC-0306558569	Berlin		Germany	Station	Middle Europe
BC-0306558564	Berlin		Germany	Station	Middle Europe
BC-0306558539	Berlin		Germany	Station	Middle Europe
BC-0302411096	Berlin		Germany	Station	Middle Europe
BC-0306558536	Berlin		Germany	Station	Middle Europe
BC-0302413912	Berlin		Germany	Station	Middle Europe
BC-0306558535	Berlin		Germany	Station	Middle Europe
BC-0306555286	Berlin		Germany	Subway	Middle Europe
BC-0302409457	Berlin		Germany	Station	Middle Europe
BC-0306555277	Berlin		Germany	Station	Middle Europe
BC-0302409434	Berlin		Germany	Station	Middle Europe
BC-0306555276	Berlin		Germany	Station	Middle Europe
BC-0302409422	Berlin		Germany	Station	Middle Europe
BC-0306555275	Berlin		Germany	Station	Middle Europe
BC-0306555270	Berlin		Germany	Station	Middle Europe
BC-0306555265	Berlin		Germany	Station	Middle Europe
BC-0302396692	Berlin		Germany	Station	Middle Europe
BC-0306558516	Berlin		Germany	Station	Middle Europe
BC-0306558400	Berlin		Germany	Station	Middle Europe
BC-0306558397	Berlin		Germany	Station	Middle Europe
BC-0306558364	Berlin		Germany	Station	Middle Europe
BC-0302411065	Berlin		Germany	Station	Middle Europe
BC-0306558360	Berlin		Germany	Subway	Middle Europe
BC-0306558358	Berlin		Germany	Station	Middle Europe
BC-0306558357	Berlin		Germany	Station	Middle Europe
BC-0306558353	Berlin		Germany	Station	Middle Europe
BC-0302411048	Berlin		Germany	Station	Middle Europe
BC-0306557704	Berlin		Germany	Station	Middle Europe
BC-0306557680	Berlin		Germany	Station	Middle Europe
BC-0306555327	Berlin		Germany	Station	Middle Europe
BC-0306555297	Berlin		Germany	Station	Middle Europe
ERR6496069	Black Sea			Biofilm	East Europe
ERR6496070	Black Sea			Biofilm	East Europe
ERR6496071	Black Sea			Biofilm	East Europe
ERR6496072	Black Sea			Biofilm	East Europe
ERR6496073	Black Sea			Biofilm	East Europe
ERR6496074	Black Sea			Biofilm	East Europe
ERR6496075	Black Sea			Biofilm	East Europe
ERR6496076	Black Sea			Biofilm	East Europe
ERR6496077	Black Sea			Biofilm	East Europe
ERR6496078	Black Sea			Biofilm	East Europe
ERR6496079	Black Sea			Biofilm	East Europe
ERR6496080	Black Sea			Biofilm	East Europe
SRR7004590	Bohemian Forest		Czech Republic	Soil	East Europe
SRR7004591	Bohemian Forest		Czech Republic	Soil	East Europe
SRR7004593	Bohemian Forest		Czech Republic	Soil	East Europe
SRR7004594	Bohemian Forest		Czech Republic	Soil	East Europe
SRR7004595	Bohemian Forest		Czech Republic	Soil	East Europe
SRR7004596	Bohemian Forest		Czech Republic	Soil	East Europe
SRR7004601	Bohemian Forest		Czech Republic	Soil	East Europe
SRR7004602	Bohemian Forest		Czech Republic	Soil	East Europe
SRR7004603	Bohemian Forest		Czech Republic	Soil	East Europe
SRR7004604	Bohemian Forest		Czech Republic	Soil	East Europe
SRR7004605	Bohemian Forest		Czech Republic	Soil	East Europe
SRR7004606	Bohemian Forest		Czech Republic	Soil	East Europe
SRR7004607	Bohemian Forest		Czech Republic	Soil	East Europe
SRR7004642	Bohemian Forest		Czech Republic	Soil	East Europe
SRR7004643	Bohemian Forest		Czech Republic	Soil	East Europe
SRR7004653	Bohemian Forest		Czech Republic	Soil	East Europe
SRR7004667	Bohemian Forest		Czech Republic	Soil	East Europe
SRR7004668	Bohemian Forest		Czech Republic	Soil	East Europe
SRR7004712	Bohemian Forest		Czech Republic	Soil	East Europe
SRR7004713	Bohemian Forest		Czech Republic	Soil	East Europe
SRR7004714	Bohemian Forest		Czech Republic	Soil	East Europe
SRR7004716	Bohemian Forest		Czech Republic	Soil	East Europe
SRR7004717	Bohemian Forest		Czech Republic	Soil	East Europe
SRR7162750	Bohemian Forest		Czech Republic	Soil	East Europe
SRR7589943	Bohemian Forest		Czech Republic	Soil	East Europe
SRR7589972	Bohemian Forest		Czech Republic	Soil	East Europe
SRR7589999	Bohemian Forest		Czech Republic	Soil	East Europe
SRR7590000	Bohemian Forest		Czech Republic	Soil	East Europe
SRR7590001	Bohemian Forest		Czech Republic	Soil	East Europe
SRR7590002	Bohemian Forest		Czech Republic	Soil	East Europe
SRR7590003	Bohemian Forest		Czech Republic	Soil	East Europe
SRR7590044	Bohemian Forest		Czech Republic	Soil	East Europe
SRR7590045	Bohemian Forest		Czech Republic	Soil	East Europe
SRR7590046	Bohemian Forest		Czech Republic	Soil	East Europe
SRR7590081	Bohemian Forest		Czech Republic	Soil	East Europe
SRR7590082	Bohemian Forest		Czech Republic	Soil	East Europe
SRR7590083	Bohemian Forest		Czech Republic	Soil	East Europe
SRR7590084	Bohemian Forest		Czech Republic	Soil	East Europe
SRR8420478	Bohemian Forest		Czech Republic	Soil	East Europe
SRR8420479	Bohemian Forest		Czech Republic	Soil	East Europe
SRR8435713	Bohemian Forest		Czech Republic	Soil	East Europe
SRR8435781	Bohemian Forest		Czech Republic	Soil	East Europe
SRR8435788	Bohemian Forest		Czech Republic	Soil	East Europe
SRR8436108	Bohemian Forest		Czech Republic	Soil	East Europe
SRR8436111	Bohemian Forest		Czech Republic	Soil	East Europe
SRR8535405	Bohemian Forest		Czech Republic	Soil	East Europe
SRR9006460	Bohemian Forest		Czech Republic	Soil	East Europe
BC-0338313260	Buenos Aires		Argentina	unlabeled buit env.	South America
BC-0338317218	Buenos Aires		Argentina	unlabeled buit env.	South America
BC-0338339382	Buenos Aires		Argentina	unlabeled buit env.	South America
BC-0338317214	Buenos Aires		Argentina	unlabeled buit env.	South America
BC-0338339276	Buenos Aires		Argentina	unlabeled buit env.	South America
BC-0338313252	Buenos Aires		Argentina	unlabeled buit env.	South America
BC-0338339374	Buenos Aires		Argentina	unlabeled buit env.	South America
BC-0338339245	Buenos Aires		Argentina	unlabeled buit env.	South America
BC-0338317185	Buenos Aires		Argentina	unlabeled buit env.	South America
BC-0338311298	Buenos Aires		Argentina	unlabeled buit env.	South America
BC-0338339346	Buenos Aires		Argentina	unlabeled buit env.	South America
BC-0338339224	Buenos Aires		Argentina	unlabeled buit env.	South America
BC-0338317165	Buenos Aires		Argentina	unlabeled buit env.	South America
BC-0338339329	Buenos Aires		Argentina	unlabeled buit env.	South America
BC-0338320013	Buenos Aires		Argentina	unlabeled buit env.	South America
BC-0338314362	Buenos Aires		Argentina	unlabeled buit env.	South America
BC-0338319363	Buenos Aires		Argentina	unlabeled buit env.	South America
BC-0338339314	Buenos Aires		Argentina	unlabeled buit env.	South America
BC-0338314351	Buenos Aires		Argentina	unlabeled buit env.	South America
BC-0338317236	Buenos Aires		Argentina	unlabeled buit env.	South America
BC-0338339296	Buenos Aires		Argentina	unlabeled buit env.	South America
BC-0338339338	Buenos Aires		Argentina	unlabeled buit env.	South America
BC-0338339385	Buenos Aires		Argentina	Station	South America
BC-0338339257	Buenos Aires		Argentina	Bank	South America
BC-0338339332	Buenos Aires		Argentina	Station	South America
BC-0338339381	Buenos Aires		Argentina	Bank	South America
BC-0338339475	Buenos Aires		Argentina	Bank	South America
BC-0338339229	Buenos Aires		Argentina	Bank	South America
BC-0338313285	Buenos Aires		Argentina	Station	South America
BC-0338315762	Buenos Aires		Argentina	Bank	South America
BC-0338319390	Buenos Aires		Argentina	Station	South America
BC-0338314341	Buenos Aires		Argentina	unlabeled buit env.	South America
BC-0338319389	Buenos Aires		Argentina	Bank	South America
BC-0338314329	Buenos Aires		Argentina	Bank	South America
BC-0338314358	Buenos Aires		Argentina	Station	South America
BC-0338314296	Buenos Aires		Argentina	unlabeled buit env.	South America
BC-0338339711	Buenos Aires		Argentina	Bank	South America
BC-0338339366	Buenos Aires		Argentina	Bank	South America
BC-0338339235	Buenos Aires		Argentina	unlabeled buit env.	South America
BC-0338339488	Buenos Aires		Argentina	Bank	South America
BC-0338339453	Buenos Aires		Argentina	Bank	South America
BC-0338339230	Buenos Aires		Argentina	unlabeled buit env.	South America
BC-0338339347	Buenos Aires		Argentina	unlabeled buit env.	South America
SRR10664320	Champenoux		France	Greenhouse	Middle Europe
SRR10664321	Champenoux		France	Greenhouse	Middle Europe
SRR10664322	Champenoux		France	Greenhouse	Middle Europe
SRR10664323	Champenoux		France	Greenhouse	Middle Europe
SRR10664324	Champenoux		France	Greenhouse	Middle Europe
SRR10664325	Champenoux		France	Greenhouse	Middle Europe
SRR10664326	Champenoux		France	Greenhouse	Middle Europe
SRR10664327	Champenoux		France	Greenhouse	Middle Europe
SRR10664328	Champenoux		France	Greenhouse	Middle Europe
SRR10664329	Champenoux		France	Greenhouse	Middle Europe
SRR10664330	Champenoux		France	Greenhouse	Middle Europe
SRR10664331	Champenoux		France	Greenhouse	Middle Europe
SRR10664332	Champenoux		France	Greenhouse	Middle Europe
SRR10664333	Champenoux		France	Greenhouse	Middle Europe
SRR10664334	Champenoux		France	Greenhouse	Middle Europe
SRR10664335	Champenoux		France	Greenhouse	Middle Europe
SRR10664336	Champenoux		France	Greenhouse	Middle Europe
SRR10664337	Champenoux		France	Greenhouse	Middle Europe
SRR10664338	Champenoux		France	Greenhouse	Middle Europe
SRR10664339	Champenoux		France	Greenhouse	Middle Europe
SRR10664340	Champenoux		France	Greenhouse	Middle Europe
SRR10664341	Champenoux		France	Greenhouse	Middle Europe
SRR10664342	Champenoux		France	Greenhouse	Middle Europe
SRR10664343	Champenoux		France	Greenhouse	Middle Europe
SRR10664344	Champenoux		France	Greenhouse	Middle Europe
SRR10664345	Champenoux		France	Greenhouse	Middle Europe
SRR10664346	Champenoux		France	Greenhouse	Middle Europe
SRR10664347	Champenoux		France	Greenhouse	Middle Europe
SRR10664348	Champenoux		France	Greenhouse	Middle Europe
SRR10664349	Champenoux		France	Greenhouse	Middle Europe
SRR10664350	Champenoux		France	Greenhouse	Middle Europe
SRR10664351	Champenoux		France	Greenhouse	Middle Europe
SRR10664352	Champenoux		France	Greenhouse	Middle Europe
SRR10664353	Champenoux		France	Greenhouse	Middle Europe
SRR10664354	Champenoux		France	Greenhouse	Middle Europe
SRR10664355	Champenoux		France	Greenhouse	Middle Europe
SRR10664356	Champenoux		France	Greenhouse	Middle Europe
SRR10664357	Champenoux		France	Greenhouse	Middle Europe
SRR10664358	Champenoux		France	Greenhouse	Middle Europe
SRR10664359	Champenoux		France	Greenhouse	Middle Europe
SRR10664360	Champenoux		France	Greenhouse	Middle Europe
SRR10664361	Champenoux		France	Greenhouse	Middle Europe
SRR10664362	Champenoux		France	Greenhouse	Middle Europe
SRR10664363	Champenoux		France	Greenhouse	Middle Europe
SRR10664364	Champenoux		France	Greenhouse	Middle Europe
SRR10664365	Champenoux		France	Greenhouse	Middle Europe
SRR10664366	Champenoux		France	Greenhouse	Middle Europe
SRR10664367	Champenoux		France	Greenhouse	Middle Europe
SRR10664368	Champenoux		France	Greenhouse	Middle Europe
SRR10664369	Champenoux		France	Greenhouse	Middle Europe
SRR17497115	Chizhou	Anhui	China	Game animal	East Asia
SRR17509949	Chizhou	Anhui	China	Game animal	East Asia
SRR17509948	Chizhou	Anhui	China	Game animal	East Asia
SRR17509947	Chizhou	Anhui	China	Game animal	East Asia
SRR11563839	Crested Butte	Colorado	United States	Soil	North America
SRR11563873	Crested Butte	Colorado	United States	Soil	North America
SRR11563874	Crested Butte	Colorado	United States	Soil	North America
SRR11563891	Crested Butte	Colorado	United States	Soil	North America
SRR11563892	Crested Butte	Colorado	United States	Soil	North America
SRR11563893	Crested Butte	Colorado	United States	Soil	North America
SRR11564047	Crested Butte	Colorado	United States	Soil	North America
SRR11564268	Crested Butte	Colorado	United States	Soil	North America
SRR11564269	Crested Butte	Colorado	United States	Soil	North America
SRR11564270	Crested Butte	Colorado	United States	Soil	North America
SRR11564271	Crested Butte	Colorado	United States	Soil	North America
SRR11564272	Crested Butte	Colorado	United States	Soil	North America
SRR11564368	Crested Butte	Colorado	United States	Soil	North America
SRR11564369	Crested Butte	Colorado	United States	Soil	North America
SRR11565167	Crested Butte	Colorado	United States	Soil	North America
SRR11565175	Crested Butte	Colorado	United States	Soil	North America
SRR11565176	Crested Butte	Colorado	United States	Soil	North America
SRR11565177	Crested Butte	Colorado	United States	Soil	North America
SRR11565178	Crested Butte	Colorado	United States	Soil	North America
SRR11565179	Crested Butte	Colorado	United States	Soil	North America
SRR11565180	Crested Butte	Colorado	United States	Soil	North America
SRR11565414	Crested Butte	Colorado	United States	Soil	North America
SRR11565434	Crested Butte	Colorado	United States	Soil	North America
SRR11565435	Crested Butte	Colorado	United States	Soil	North America
SRR11565436	Crested Butte	Colorado	United States	Soil	North America
SRR11565437	Crested Butte	Colorado	United States	Soil	North America
SRR11565438	Crested Butte	Colorado	United States	Soil	North America
SRR11565824	Crested Butte	Colorado	United States	Soil	North America
SRR11565844	Crested Butte	Colorado	United States	Soil	North America
SRR11565845	Crested Butte	Colorado	United States	Soil	North America
SRR11565846	Crested Butte	Colorado	United States	Soil	North America
SRR11565847	Crested Butte	Colorado	United States	Soil	North America
SRR11565848	Crested Butte	Colorado	United States	Soil	North America
SRR11075871	Crested Butte	Colorado	United States	Soil	North America
SRR11076227	Crested Butte	Colorado	United States	Soil	North America
SRR11565415	Crested Butte	Colorado	United States	Soil	North America
SRR11678312	Crested Butte	Colorado	United States	Soil	North America
SRR11678313	Crested Butte	Colorado	United States	Soil	North America
SRR11678315	Crested Butte	Colorado	United States	Soil	North America
SRR11678449	Crested Butte	Colorado	United States	Soil	North America
SRR11678561	Crested Butte	Colorado	United States	Soil	North America
SRR11678562	Crested Butte	Colorado	United States	Soil	North America
SRR11826655	Crested Butte	Colorado	United States	Soil	North America
SRR11826708	Crested Butte	Colorado	United States	Soil	North America
BC-0345272349	Daegu		Republic of Korea	Station	East Asia
BC-0345270857	Daegu		Republic of Korea	Station	East Asia
BC-0345257166	Daegu		Republic of Korea	Station	East Asia
BC-0345235186	Daegu		Republic of Korea	Station	East Asia
BC-0345272421	Daegu		Republic of Korea	Station	East Asia
BC-0345235127	Daegu		Republic of Korea	Station	East Asia
BC-0345272374	Daegu		Republic of Korea	Station	East Asia
BC-0345235121	Daegu		Republic of Korea	Station	East Asia
BC-0345272391	Daegu		Republic of Korea	Station	East Asia
BC-0345272379	Daegu		Republic of Korea	Station	East Asia
BC-0345272388	Daegu		Republic of Korea	Station	East Asia
BC-0345272370	Daegu		Republic of Korea	Station	East Asia
BC-0345272383	Daegu		Republic of Korea	Station	East Asia
BC-0345269801	Daegu		Republic of Korea	Station	East Asia
BC-0345235174	Daegu		Republic of Korea	Station	East Asia
BC-0345250127	Daegu		Republic of Korea	Station	East Asia
BC-0345235162	Daegu		Republic of Korea	Station	East Asia
BC-0345271649	Daegu		Republic of Korea	Station	East Asia
BC-0345235145	Daegu		Republic of Korea	Station	East Asia
BC-0345235181	Daegu		Republic of Korea	Station	East Asia
BC-0345235158	Daegu		Republic of Korea	Station	East Asia
BC-0345270217	Daegu		Republic of Korea	Station	East Asia
BC-0345235178	Daegu		Republic of Korea	Station	East Asia
BC-0345235128	Daegu		Republic of Korea	Station	East Asia
BC-0345235119	Daegu		Republic of Korea	Station	East Asia
BC-0345235109	Daegu		Republic of Korea	Station	East Asia
BC-0345299165	Daegu		Republic of Korea	Station	East Asia
BC-0345297724	Daegu		Republic of Korea	Station	East Asia
BC-0345297690	Daegu		Republic of Korea	Station	East Asia
BC-0345296702	Daegu		Republic of Korea	Station	East Asia
BC-0345272081	Daegu		Republic of Korea	Station	East Asia
BC-0332767877	Daegu		Republic of Korea	Station	East Asia
BC-0332774015	Daegu		Republic of Korea	Station	East Asia
BC-0332774013	Daegu		Republic of Korea	Station	East Asia
BC-0332774012	Daegu		Republic of Korea	Station	East Asia
BC-0332767104	Daegu		Republic of Korea	Station	East Asia
BC-0332773896	Daegu		Republic of Korea	Station	East Asia
BC-0332767076	Daegu		Republic of Korea	Station	East Asia
BC-0332773725	Daegu		Republic of Korea	Station	East Asia
BC-0332767065	Daegu		Republic of Korea	Station	East Asia
BC-0332773686	Daegu		Republic of Korea	Station	East Asia
BC-0332773669	Daegu		Republic of Korea	Station	East Asia
BC-0332763054	Daegu		Republic of Korea	Station	East Asia
BC-0332773522	Daegu		Republic of Korea	Station	East Asia
BC-0332773424	Daegu		Republic of Korea	Station	East Asia
BC-0332773417	Daegu		Republic of Korea	Station	East Asia
BC-0332758526	Daegu		Republic of Korea	Station	East Asia
BC-0332758524	Daegu		Republic of Korea	Station	East Asia
BC-0332773401	Daegu		Republic of Korea	Station	East Asia
BC-0332758516	Daegu		Republic of Korea	Station	East Asia
BC-0332773393	Daegu		Republic of Korea	Station	East Asia
BC-0332758498	Daegu		Republic of Korea	Station	East Asia
BC-0332773387	Daegu		Republic of Korea	Station	East Asia
BC-0332756636	Daegu		Republic of Korea	Station	East Asia
BC-0332773205	Daegu		Republic of Korea	Station	East Asia
BC-0332773198	Daegu		Republic of Korea	Station	East Asia
BC-0332774174	Daegu		Republic of Korea	Station	East Asia
BC-0332774173	Daegu		Republic of Korea	Station	East Asia
BC-0332774167	Daegu		Republic of Korea	Station	East Asia
BC-0345300519	Daegu		Republic of Korea	Station	East Asia
BC-0332774165	Daegu		Republic of Korea	Station	East Asia
BC-0332769064	Daegu		Republic of Korea	Station	East Asia
BC-0332773196	Daegu		Republic of Korea	Station	East Asia
BC-0332773055	Daegu		Republic of Korea	Station	East Asia
BC-0332773045	Daegu		Republic of Korea	Station	East Asia
BC-0332773031	Daegu		Republic of Korea	Station	East Asia
BC-0332773019	Daegu		Republic of Korea	Station	East Asia
BC-0332773015	Daegu		Republic of Korea	Station	East Asia
BC-0332773014	Daegu		Republic of Korea	Station	East Asia
BC-0332773008	Daegu		Republic of Korea	Station	East Asia
BC-0332773007	Daegu		Republic of Korea	Station	East Asia
BC-0332773006	Daegu		Republic of Korea	Station	East Asia
BC-0332773258	Daegu		Republic of Korea	Station	East Asia
BC-0332773255	Daegu		Republic of Korea	Station	East Asia
BC-0332773254	Daegu		Republic of Korea	Station	East Asia
BC-0332773251	Daegu		Republic of Korea	Station	East Asia
BC-0332773235	Daegu		Republic of Korea	Station	East Asia
BC-0332773227	Daegu		Republic of Korea	Station	East Asia
BC-0332773005	Daegu		Republic of Korea	Station	East Asia
BC-0332774209	Daegu		Republic of Korea	Station	East Asia
BC-0332772999	Daegu		Republic of Korea	Station	East Asia
BC-0332774208	Daegu		Republic of Korea	Station	East Asia
BC-0332772991	Daegu		Republic of Korea	Station	East Asia
BC-0332774207	Daegu		Republic of Korea	Station	East Asia
BC-0332772990	Daegu		Republic of Korea	Station	East Asia
BC-0332774201	Daegu		Republic of Korea	Station	East Asia
BC-0332772981	Daegu		Republic of Korea	Station	East Asia
BC-0332774198	Daegu		Republic of Korea	Station	East Asia
BC-0332774182	Daegu		Republic of Korea	Station	East Asia
BC-0332773384	Daegu		Republic of Korea	Station	East Asia
BC-0332755255	Daegu		Republic of Korea	Station	East Asia
BC-0332773280	Daegu		Republic of Korea	Station	East Asia
BC-0332773270	Daegu		Republic of Korea	Station	East Asia
BC-0332773263	Daegu		Republic of Korea	Station	East Asia
SRR17497090	Dazhou	Sichuan	China	Game animal	East Asia
SRR12581884	East China Sea		China	Seawater	East Asia
SRR12581885	East China Sea		China	Seawater	East Asia
SRR12581886	East China Sea		China	Seawater	East Asia
SRR12581887	East China Sea		China	Seawater	East Asia
SRR12581888	East China Sea		China	Seawater	East Asia
SRR12581889	East China Sea		China	Seawater	East Asia
SRR11622285	Everglades Agricultural Area	Florida	United States	Soil	North America
SRR11622286	Everglades Agricultural Area	Florida	United States	Soil	North America
SRR11622354	Everglades Agricultural Area	Florida	United States	Soil	North America
SRR11622356	Everglades Agricultural Area	Florida	United States	Soil	North America
SRR11622450	Everglades Agricultural Area	Florida	United States	Soil	North America
SRR11622633	Everglades Agricultural Area	Florida	United States	Soil	North America
SRR11622660	Everglades Agricultural Area	Florida	United States	Soil	North America
SRR11622682	Everglades Agricultural Area	Florida	United States	Soil	North America
SRR11622778	Everglades Agricultural Area	Florida	United States	Soil	North America
SRR11622779	Everglades Agricultural Area	Florida	United States	Soil	North America
SRR11622780	Everglades Agricultural Area	Florida	United States	Soil	North America
SRR11623485	Everglades Agricultural Area	Florida	United States	Soil	North America
SRR12658563	Everglades Agricultural Area	Florida	United States	Soil	North America
SRR12658566	Everglades Agricultural Area	Florida	United States	Soil	North America
SRR12658568	Everglades Agricultural Area	Florida	United States	Soil	North America
SRR12658569	Everglades Agricultural Area	Florida	United States	Soil	North America
SRR12658570	Everglades Agricultural Area	Florida	United States	Soil	North America
SRR13152143	Florianopolis	Santa Catarina	Brazil	Wastewater	South America
SRR13152144	Florianopolis	Santa Catarina	Brazil	Wastewater	South America
SRR17481199	Fuyang	Anhui	China	Game animal	East Asia
SRR17497077	Fuzhou	Fujian	China	Game animal	East Asia
SRR17509970	Ganzhou	Jiangxi	China	Game animal	East Asia
SRR17509966	Ganzhou	Jiangxi	China	Game animal	East Asia
SRR18174457	Giessen		Germany	Soil	Middle Europe
SRR18174458	Giessen		Germany	Soil	Middle Europe
SRR18174459	Giessen		Germany	Soil	Middle Europe
SRR18174460	Giessen		Germany	Soil	Middle Europe
SRR18174462	Giessen		Germany	Soil	Middle Europe
SRR18174463	Giessen		Germany	Soil	Middle Europe
SRR18174464	Giessen		Germany	Soil	Middle Europe
SRR18174465	Giessen		Germany	Soil	Middle Europe
SRR18174466	Giessen		Germany	Soil	Middle Europe
SRR18174467	Giessen		Germany	Soil	Middle Europe
SRR18174468	Giessen		Germany	Soil	Middle Europe
SRR17481183	Guangzhou	Guangdong	China	Game animal	East Asia
SRR17481182	Guangzhou	Guangdong	China	Game animal	East Asia
SRR17497069	Guilin	Guangxi	China	Game animal	East Asia
SRR17497068	Guilin	Guangxi	China	Game animal	East Asia
SRR17497064	Guilin	Guangxi	China	Game animal	East Asia
SRR17497063	Guilin	Guangxi	China	Game animal	East Asia
SRR17509979	Guilin	Guangxi	China	Game animal	East Asia
SRR17509978	Guilin	Guangxi	China	Game animal	East Asia
SRR17509977	Guilin	Guangxi	China	Game animal	East Asia
SRR17509976	Guilin	Guangxi	China	Game animal	East Asia
SRR17509914	Haerbin	Heilongjiang	China	Game animal	East Asia
SRR17481235	Haikou	Hainan	China	Game animal	East Asia
SRR17509923	Haikou	Hainan	China	Game animal	East Asia
SRR17497127	Hefei	Anhui	China	Game animal	East Asia
SRR17497126	Hefei	Anhui	China	Game animal	East Asia
SRR17481245	Hefei	Anhui	China	Game animal	East Asia
SRR17481244	Hefei	Anhui	China	Game animal	East Asia
SRR17509946	Hefei	Anhui	China	Game animal	East Asia
SRR17481243	Hefei	Anhui	China	Game animal	East Asia
SRR17509945	Hefei	Anhui	China	Game animal	East Asia
SRR17481242	Hefei	Anhui	China	Game animal	East Asia
SRR17509932	Hengshui	Hebei	China	Game animal	East Asia
SRR17509931	Hengshui	Hebei	China	Game animal	East Asia
SRR17481211	Hengshui	Hebei	China	Game animal	East Asia
SRR17481210	Hengshui	Hebei	China	Game animal	East Asia
SRR17481209	Hengshui	Hebei	China	Game animal	East Asia
SRR17481208	Hengshui	Hebei	China	Game animal	East Asia
SRR17481224	Heze	Shandong	China	Game animal	East Asia
SRR17481223	Heze	Shandong	China	Game animal	East Asia
SRR17509933	Heze	Shandong	China	Game animal	East Asia
SRR1578879	Highborne Cay		Bahamas	Microbialites	Latin America
SRR1580580	Highborne Cay		Bahamas	Microbialites	Latin America
SRR1581013	Highborne Cay		Bahamas	Microbialites	Latin America
SRR1581657	Highborne Cay		Bahamas	Microbialites	Latin America
SRR1582003	Highborne Cay		Bahamas	Microbialites	Latin America
BC-0338302657	Hong Kong		China	Street	East Asia
BC-0338302652	Hong Kong		China	Street	East Asia
BC-0338302651	Hong Kong		China	Street	East Asia
BC-0338302650	Hong Kong		China	Street	East Asia
BC-0338302572	Hong Kong		China	University	East Asia
BC-0338302473	Hong Kong		China	Street	East Asia
BC-0338302463	Hong Kong		China	Street	East Asia
BC-0338302462	Hong Kong		China	Street	East Asia
BC-0338302451	Hong Kong		China	Street	East Asia
BC-0338302445	Hong Kong		China	Park	East Asia
BC-0338302444	Hong Kong		China	Park	East Asia
BC-0338302437	Hong Kong		China	Street	East Asia
BC-0338302435	Hong Kong		China	Street	East Asia
BC-0338302422	Hong Kong		China	Street	East Asia
BC-0338302420	Hong Kong		China	Park	East Asia
BC-0338302417	Hong Kong		China	Street	East Asia
BC-0338302416	Hong Kong		China	Street	East Asia
BC-0338302415	Hong Kong		China	Street	East Asia
BC-0338302412	Hong Kong		China	Street	East Asia
BC-0338279183	Hong Kong		China	Park	East Asia
BC-0338278398	Hong Kong		China	Street	East Asia
BC-0338302646	Hong Kong		China	Street	East Asia
BC-0338302644	Hong Kong		China	Street	East Asia
BC-0338302642	Hong Kong		China	Park	East Asia
BC-0338302635	Hong Kong		China	Street	East Asia
BC-0338302628	Hong Kong		China	Street	East Asia
BC-0338302621	Hong Kong		China	Street	East Asia
BC-0338302619	Hong Kong		China	Park	East Asia
BC-0338302616	Hong Kong		China	Street	East Asia
BC-0338302615	Hong Kong		China	Street	East Asia
BC-0338302583	Hong Kong		China	Street	East Asia
BC-0338302614	Hong Kong		China	Street	East Asia
BC-0338302582	Hong Kong		China	Street	East Asia
BC-0338302611	Hong Kong		China	Street	East Asia
BC-0338302607	Hong Kong		China	Park	East Asia
BC-0338302573	Hong Kong		China	Street	East Asia
BC-0338302597	Hong Kong		China	Street	East Asia
BC-0338278392	Hong Kong		China	Street	East Asia
BC-0338278368	Hong Kong		China	Street	East Asia
BC-0338278359	Hong Kong		China	Street	East Asia
BC-0338278349	Hong Kong		China	Street	East Asia
BC-0338278342	Hong Kong		China	Street	East Asia
BC-0338278328	Hong Kong		China	Park	East Asia
BC-0338278316	Hong Kong		China	Street	East Asia
BC-0338278315	Hong Kong		China	Street	East Asia
BC-0338278314	Hong Kong		China	Street	East Asia
BC-0338300937	Hong Kong		China	Street	East Asia
BC-0338300929	Hong Kong		China	Street	East Asia
BC-0338300802	Hong Kong		China	Street	East Asia
BC-0338300753	Hong Kong		China	Street	East Asia
BC-0338279222	Hong Kong		China	Street	East Asia
BC-0338279198	Hong Kong		China	Street	East Asia
BC-0338302411	Hong Kong		China	Street	East Asia
BC-0338302393	Hong Kong		China	Street	East Asia
BC-0338302386	Hong Kong		China	Street	East Asia
BC-0338302381	Hong Kong		China	Street	East Asia
BC-0338302380	Hong Kong		China	Street	East Asia
BC-0338301042	Hong Kong		China	Street	East Asia
SRR17481234	Honghe	Yunnan	China	Game animal	East Asia
SRR17509912	Huzhou	Zhejiang	China	Game animal	East Asia
SRR12632504	Hveragerdi		Iceland	Grassland	Northern Europe
SRR12632505	Hveragerdi		Iceland	Grassland	Northern Europe
SRR12632506	Hveragerdi		Iceland	Grassland	Northern Europe
SRR12632507	Hveragerdi		Iceland	Grassland	Northern Europe
SRR12632508	Hveragerdi		Iceland	Grassland	Northern Europe
SRR12632509	Hveragerdi		Iceland	Grassland	Northern Europe
SRR12632510	Hveragerdi		Iceland	Grassland	Northern Europe
SRR12632511	Hveragerdi		Iceland	Grassland	Northern Europe
SRR12632512	Hveragerdi		Iceland	Grassland	Northern Europe
SRR12632513	Hveragerdi		Iceland	Grassland	Northern Europe
SRR12632514	Hveragerdi		Iceland	Grassland	Northern Europe
SRR12632515	Hveragerdi		Iceland	Grassland	Northern Europe
SRR12632516	Hveragerdi		Iceland	Grassland	Northern Europe
SRR12632517	Hveragerdi		Iceland	Grassland	Northern Europe
SRR12632518	Hveragerdi		Iceland	Grassland	Northern Europe
SRR12632519	Hveragerdi		Iceland	Grassland	Northern Europe
SRR12632520	Hveragerdi		Iceland	Grassland	Northern Europe
SRR12632521	Hveragerdi		Iceland	Grassland	Northern Europe
SRR12632522	Hveragerdi		Iceland	Grassland	Northern Europe
SRR12632523	Hveragerdi		Iceland	Grassland	Northern Europe
BC-0345731381	Islamabad		Pakistan	ATM	South Asia
BC-0345699324	Islamabad		Pakistan	unlabeled buit env.	South Asia
BC-0345730646	Islamabad		Pakistan	unlabeled buit env.	South Asia
BC-0345690871	Islamabad		Pakistan	unlabeled buit env.	South Asia
BC-0345730631	Islamabad		Pakistan	unlabeled buit env.	South Asia
BC-0345723322	Islamabad		Pakistan	unlabeled buit env.	South Asia
BC-0345702211	Islamabad		Pakistan	unlabeled buit env.	South Asia
BC-0345732111	Islamabad		Pakistan	unlabeled buit env.	South Asia
BC-0345702204	Islamabad		Pakistan	unlabeled buit env.	South Asia
BC-0345318061	Islamabad		Pakistan	unlabeled buit env.	South Asia
BC-0345318456	Islamabad		Pakistan	unlabeled buit env.	South Asia
BC-0345318043	Islamabad		Pakistan	unlabeled buit env.	South Asia
BC-0345317929	Islamabad		Pakistan	unlabeled buit env.	South Asia
BC-0345318426	Islamabad		Pakistan	unlabeled buit env.	South Asia
BC-0345321413	Islamabad		Pakistan	unlabeled buit env.	South Asia
BC-0345318039	Islamabad		Pakistan	unlabeled buit env.	South Asia
BC-0345318394	Islamabad		Pakistan	unlabeled buit env.	South Asia
BC-0345317914	Islamabad		Pakistan	unlabeled buit env.	South Asia
BC-0345318371	Islamabad		Pakistan	unlabeled buit env.	South Asia
BC-0345318767	Islamabad		Pakistan	unlabeled buit env.	South Asia
BC-0345318022	Islamabad		Pakistan	unlabeled buit env.	South Asia
BC-0345316120	Islamabad		Pakistan	unlabeled buit env.	South Asia
BC-0345318354	Islamabad		Pakistan	unlabeled buit env.	South Asia
BC-0345312844	Islamabad		Pakistan	unlabeled buit env.	South Asia
BC-0345318742	Islamabad		Pakistan	unlabeled buit env.	South Asia
BC-0345318740	Islamabad		Pakistan	unlabeled buit env.	South Asia
BC-0345318017	Islamabad		Pakistan	unlabeled buit env.	South Asia
BC-0345318737	Islamabad		Pakistan	unlabeled buit env.	South Asia
BC-0345318344	Islamabad		Pakistan	unlabeled buit env.	South Asia
BC-0345317990	Islamabad		Pakistan	unlabeled buit env.	South Asia
BC-0345312359	Islamabad		Pakistan	unlabeled buit env.	South Asia
BC-0345318324	Islamabad		Pakistan	unlabeled buit env.	South Asia
BC-0345318730	Islamabad		Pakistan	unlabeled buit env.	South Asia
BC-0345317968	Islamabad		Pakistan	unlabeled buit env.	South Asia
BC-0345309286	Islamabad		Pakistan	unlabeled buit env.	South Asia
BC-0345318285	Islamabad		Pakistan	unlabeled buit env.	South Asia
BC-0345318725	Islamabad		Pakistan	unlabeled buit env.	South Asia
BC-0345317962	Islamabad		Pakistan	unlabeled buit env.	South Asia
BC-0345318714	Islamabad		Pakistan	unlabeled buit env.	South Asia
BC-0345318111	Islamabad		Pakistan	unlabeled buit env.	South Asia
BC-0345317954	Islamabad		Pakistan	unlabeled buit env.	South Asia
BC-0345318498	Islamabad		Pakistan	unlabeled buit env.	South Asia
BC-0345318103	Islamabad		Pakistan	unlabeled buit env.	South Asia
BC-0345317940	Islamabad		Pakistan	unlabeled buit env.	South Asia
BC-0345732081	Islamabad		Pakistan	unlabeled buit env.	South Asia
BC-0345731405	Islamabad		Pakistan	unlabeled buit env.	South Asia
BC-0345731392	Islamabad		Pakistan	unlabeled buit env.	South Asia
BC-0345731388	Islamabad		Pakistan	unlabeled buit env.	South Asia
BC-0345730647	Islamabad		Pakistan	unlabeled buit env.	South Asia
BC-0345318788	Islamabad		Pakistan	ATM	South Asia
BC-0345318501	Islamabad		Pakistan	Hospital	South Asia
BC-0345318784	Islamabad		Pakistan	Cash and Carry	South Asia
BC-0345318467	Islamabad		Pakistan	Hospital	South Asia
BC-0345318425	Islamabad		Pakistan	Cash and Carry	South Asia
BC-0345318759	Islamabad		Pakistan	Cash and Carry	South Asia
BC-0345318450	Islamabad		Pakistan	Hospital	South Asia
BC-0345318362	Islamabad		Pakistan	Cash and Carry	South Asia
BC-0345318704	Islamabad		Pakistan	ATM	South Asia
BC-0345318445	Islamabad		Pakistan	Hospital	South Asia
BC-0345318279	Islamabad		Pakistan	unlabeled buit env.	South Asia
BC-0345318355	Islamabad		Pakistan	Cash and Carry	South Asia
BC-0345318790	Islamabad		Pakistan	ATM	South Asia
BC-0345318502	Islamabad		Pakistan	Hospital	South Asia
BC-0345318435	Islamabad		Pakistan	Hospital	South Asia
BC-0345318049	Islamabad		Pakistan	Hospital	South Asia
BC-0345318266	Islamabad		Pakistan	unlabeled buit env.	South Asia
BC-0345318293	Islamabad		Pakistan	unlabeled buit env.	South Asia
BC-0345318028	Islamabad		Pakistan	Hospital	South Asia
BC-0345317903	Islamabad		Pakistan	Cash and Carry	South Asia
BC-0345318110	Islamabad		Pakistan	unlabeled buit env.	South Asia
BC-0345318289	Islamabad		Pakistan	unlabeled buit env.	South Asia
BC-0345318008	Islamabad		Pakistan	Hospital	South Asia
BC-0345317899	Islamabad		Pakistan	Cash and Carry	South Asia
BC-0345318072	Islamabad		Pakistan	unlabeled buit env.	South Asia
BC-0345318055	Islamabad		Pakistan	unlabeled buit env.	South Asia
BC-0345317985	Islamabad		Pakistan	Hospital	South Asia
BC-0345317873	Islamabad		Pakistan	unlabeled buit env.	South Asia
BC-0345309278	Islamabad		Pakistan	unlabeled buit env.	South Asia
BC-0345317930	Islamabad		Pakistan	Hospital	South Asia
BC-0345312923	Islamabad		Pakistan	unlabeled buit env.	South Asia
BC-0345699321	Islamabad		Pakistan	Private Diagnostic Lab	South Asia
SRR17497074	Jinhua	Zhejiang	China	Game animal	East Asia
SRR17497048	Jinhua	Zhejiang	China	Game animal	East Asia
SRR17497047	Jinhua	Zhejiang	China	Game animal	East Asia
SRR17497046	Jinhua	Zhejiang	China	Game animal	East Asia
SRR17497088	Jinhua	Zhejiang	China	Game animal	East Asia
SRR17497087	Jinhua	Zhejiang	China	Game animal	East Asia
SRR17497086	Jinhua	Zhejiang	China	Game animal	East Asia
SRR17497084	Jinhua	Zhejiang	China	Game animal	East Asia
SRR17497078	Jinhua	Zhejiang	China	Game animal	East Asia
SRR17481251	Jinhua	Zhejiang	China	Game animal	East Asia
SRR17481250	Jinhua	Zhejiang	China	Game animal	East Asia
SRR17481239	Jinhua	Zhejiang	China	Game animal	East Asia
SRR17509951	Jinhua	Zhejiang	China	Game animal	East Asia
SRR17509950	Jinhua	Zhejiang	China	Game animal	East Asia
SRR17481228	Jinhua	Zhejiang	China	Game animal	East Asia
SRR17481217	Jinhua	Zhejiang	China	Game animal	East Asia
SRR17509939	Jinhua	Zhejiang	China	Game animal	East Asia
SRR17481206	Jinhua	Zhejiang	China	Game animal	East Asia
SRR17481195	Jinhua	Zhejiang	China	Game animal	East Asia
SRR17481184	Jinhua	Zhejiang	China	Game animal	East Asia
SRR17481176	Jinhua	Zhejiang	China	Game animal	East Asia
SRR17509928	Jinhua	Zhejiang	China	Game animal	East Asia
SRR17509917	Jinhua	Zhejiang	China	Game animal	East Asia
SRR17481175	Jinhua	Zhejiang	China	Game animal	East Asia
SRR17481249	Jinhua	Zhejiang	China	Game animal	East Asia
SRR17481248	Jinhua	Zhejiang	China	Game animal	East Asia
SRR17481247	Jinhua	Zhejiang	China	Game animal	East Asia
SRR17509913	Jinhua	Zhejiang	China	Game animal	East Asia
SRR17509911	Jinhua	Zhejiang	China	Game animal	East Asia
SRR17509909	Jinhua	Zhejiang	China	Game animal	East Asia
SRR17509916	Jinhua	Zhejiang	China	Game animal	East Asia
SRR17481233	Jinhua	Zhejiang	China	Game animal	East Asia
SRR17509915	Jinhua	Zhejiang	China	Game animal	East Asia
SRR17481179	Jinhua	Zhejiang	China	Game animal	East Asia
SRR17481178	Jinhua	Zhejiang	China	Game animal	East Asia
SRR17481177	Jinhua	Zhejiang	China	Game animal	East Asia
SRR17497081	Jinzhou	Liaoning	China	Game animal	East Asia
SRR17497097	Jiujiang	Jiangxi	China	Game animal	East Asia
SRR11829333	Kirkland	Washington	United States	Sediment	North America
SRR11829334	Kirkland	Washington	United States	Sediment	North America
SRR11829335	Kirkland	Washington	United States	Sediment	North America
SRR11829351	Kirkland	Washington	United States	Sediment	North America
SRR11829352	Kirkland	Washington	United States	Sediment	North America
SRR11829377	Kirkland	Washington	United States	Sediment	North America
SRR11829378	Kirkland	Washington	United States	Sediment	North America
SRR11829379	Kirkland	Washington	United States	Sediment	North America
SRR11829381	Kirkland	Washington	United States	Sediment	North America
SRR11829382	Kirkland	Washington	United States	Sediment	North America
SRR11829448	Kirkland	Washington	United States	Sediment	North America
SRR11829504	Kirkland	Washington	United States	Sediment	North America
SRR11829510	Kirkland	Washington	United States	Sediment	North America
SRR11829511	Kirkland	Washington	United States	Sediment	North America
SRR11829512	Kirkland	Washington	United States	Sediment	North America
SRR11829513	Kirkland	Washington	United States	Sediment	North America
SRR11829514	Kirkland	Washington	United States	Sediment	North America
BC-0302413057	Krakow		Poland	Station	Middle Europe
BC-0302411034	Krakow		Poland	Station	Middle Europe
BC-0302413048	Krakow		Poland	Lab	Middle Europe
BC-0302411025	Krakow		Poland	Station	Middle Europe
BC-0302413047	Krakow		Poland	Station	Middle Europe
BC-0302410944	Krakow		Poland	Station	Middle Europe
BC-0302412935	Krakow		Poland	Station	Middle Europe
BC-0302410809	Krakow		Poland	Station	Middle Europe
BC-0302412931	Krakow		Poland	Station	Middle Europe
BC-0302410808	Krakow		Poland	Station	Middle Europe
BC-0302412918	Krakow		Poland	Station	Middle Europe
BC-0302412897	Krakow		Poland	Station	Middle Europe
BC-0302410801	Krakow		Poland	Station	Middle Europe
BC-0302412896	Krakow		Poland	Station	Middle Europe
BC-0302410781	Krakow		Poland	Station	Middle Europe
BC-0302410770	Krakow		Poland	Station	Middle Europe
BC-0302412880	Krakow		Poland	Station	Middle Europe
BC-0302410758	Krakow		Poland	Station	Middle Europe
BC-0302412858	Krakow		Poland	Station	Middle Europe
BC-0302410755	Krakow		Poland	Station	Middle Europe
BC-0302410747	Krakow		Poland	Station	Middle Europe
BC-0302412855	Krakow		Poland	Station	Middle Europe
BC-0302410532	Krakow		Poland	Station	Middle Europe
BC-0302410523	Krakow		Poland	Station	Middle Europe
BC-0302412853	Krakow		Poland	Station	Middle Europe
BC-0302410490	Krakow		Poland	Station	Middle Europe
BC-0302412852	Krakow		Poland	Station	Middle Europe
BC-0302412843	Krakow		Poland	Station	Middle Europe
BC-0302411522	Krakow		Poland	Station	Middle Europe
BC-0302413993	Krakow		Poland	Station	Middle Europe
BC-0302411445	Krakow		Poland	Station	Middle Europe
BC-0302413988	Krakow		Poland	Station	Middle Europe
BC-0302411344	Krakow		Poland	Station	Middle Europe
BC-0302413986	Krakow		Poland	Station	Middle Europe
BC-0302411310	Krakow		Poland	Station	Middle Europe
BC-0302413956	Krakow		Poland	Station	Middle Europe
BC-0302411303	Krakow		Poland	Station	Middle Europe
BC-0302413948	Krakow		Poland	Station	Middle Europe
BC-0302411302	Krakow		Poland	Station	Middle Europe
BC-0302413943	Krakow		Poland	Station	Middle Europe
BC-0302411294	Krakow		Poland	Station	Middle Europe
BC-0302413933	Krakow		Poland	Station	Middle Europe
BC-0302375699	Krakow		Poland	Station	Middle Europe
BC-0302411266	Krakow		Poland	Station	Middle Europe
BC-0302413927	Krakow		Poland	Station	Middle Europe
BC-0302375695	Krakow		Poland	Station	Middle Europe
BC-0302411223	Krakow		Poland	Station	Middle Europe
BC-0302411105	Krakow		Poland	Station	Middle Europe
BC-0247295148	Krakow		Poland	Station	Middle Europe
BC-0302413918	Krakow		Poland	Station	Middle Europe
BC-0302411100	Krakow		Poland	Station	Middle Europe
BC-0247293836	Krakow		Poland	Station	Middle Europe
BC-0302413915	Krakow		Poland	Station	Middle Europe
BC-0302411097	Krakow		Poland	Station	Middle Europe
BC-0247293402	Krakow		Poland	Station	Middle Europe
BC-0302411084	Krakow		Poland	Station	Middle Europe
BC-0302413911	Krakow		Poland	Station	Middle Europe
BC-0302413061	Krakow		Poland	Station	Middle Europe
BC-0302411788	Krakow		Poland	Lab	Middle Europe
BC-0302411589	Krakow		Poland	Station	Middle Europe
BC-0302411580	Krakow		Poland	Station	Middle Europe
BC-0302411570	Krakow		Poland	Station	Middle Europe
BC-0302409392	Krakow		Poland	Station	Middle Europe
BC-0302406558	Krakow		Poland	Station	Middle Europe
BC-0302411554	Krakow		Poland	Station	Middle Europe
BC-0302411552	Krakow		Poland	Station	Middle Europe
BC-0302411543	Krakow		Poland	Station	Middle Europe
BC-0302423214	Krakow		Poland	Station	Middle Europe
BC-0302389496	Krakow		Poland	Station	Middle Europe
BC-0302411080	Krakow		Poland	Station	Middle Europe
BC-0302413124	Krakow		Poland	Station	Middle Europe
BC-0302411076	Krakow		Poland	Station	Middle Europe
BC-0302413101	Krakow		Poland	Station	Middle Europe
BC-0302411072	Krakow		Poland	Station	Middle Europe
BC-0247292208	Krakow		Poland	Station	Middle Europe
BC-0302413099	Krakow		Poland	Station	Middle Europe
BC-0302411068	Krakow		Poland	Station	Middle Europe
BC-0302413079	Krakow		Poland	Station	Middle Europe
BC-0302411064	Krakow		Poland	Station	Middle Europe
BC-0302413066	Krakow		Poland	Station	Middle Europe
BC-0302411054	Krakow		Poland	Station	Middle Europe
BC-0302413065	Krakow		Poland	Station	Middle Europe
BC-0302412756	Krakow		Poland	Station	Middle Europe
BC-0302411919	Krakow		Poland	Station	Middle Europe
BC-0302410212	Krakow		Poland	Station	Middle Europe
BC-0302410205	Krakow		Poland	Station	Middle Europe
BC-0302411872	Krakow		Poland	Station	Middle Europe
BC-0302410183	Krakow		Poland	Station	Middle Europe
BC-0302411841	Krakow		Poland	Station	Middle Europe
BC-0302411830	Krakow		Poland	Station	Middle Europe
BC-0302409459	Krakow		Poland	Station	Middle Europe
SRR17509973	Kunming	Yunnan	China	Game animal	East Asia
SRR17497094	Kunming	Yunnan	China	Game animal	East Asia
SRR17497092	Kunming	Yunnan	China	Game animal	East Asia
BC-0345724500	Kusatsu		Japan	Station	East Asia
BC-0345724478	Kusatsu		Japan	Station	East Asia
BC-0345724469	Kusatsu		Japan	Station	East Asia
BC-0345723699	Kusatsu		Japan	Station	East Asia
BC-0345723698	Kusatsu		Japan	Station	East Asia
BC-0345723696	Kusatsu		Japan	Station	East Asia
BC-0345723694	Kusatsu		Japan	Station	East Asia
BC-0345723689	Kusatsu		Japan	Station	East Asia
BC-0345723680	Kusatsu		Japan	Station	East Asia
BC-0345723677	Kusatsu		Japan	Station	East Asia
BC-0345723668	Kusatsu		Japan	Station	East Asia
BC-0345723661	Kusatsu		Japan	Station	East Asia
BC-0345723660	Kusatsu		Japan	Station	East Asia
BC-0345723659	Kusatsu		Japan	Station	East Asia
BC-0345724543	Kusatsu		Japan	Station	East Asia
BC-0345723651	Kusatsu		Japan	Station	East Asia
BC-0345724542	Kusatsu		Japan	Station	East Asia
BC-0345724539	Kusatsu		Japan	Station	East Asia
BC-0345723644	Kusatsu		Japan	Station	East Asia
BC-0345723632	Kusatsu		Japan	Station	East Asia
BC-0345724531	Kusatsu		Japan	Station	East Asia
BC-0345724530	Kusatsu		Japan	Station	East Asia
BC-0345723630	Kusatsu		Japan	Station	East Asia
BC-0345723629	Kusatsu		Japan	Station	East Asia
BC-0345723627	Kusatsu		Japan	Station	East Asia
BC-0345723616	Kusatsu		Japan	Station	East Asia
BC-0345723609	Kusatsu		Japan	Station	East Asia
BC-0345712655	Kusatsu		Japan	Station	East Asia
SRR17481198	Langfang	HeBei	China	Game animal	East Asia
SRR5208338	Laval	Quebec	Canada	Soil	North America
SRR5208339	Laval	Quebec	Canada	Soil	North America
SRR5208340	Laval	Quebec	Canada	Soil	North America
SRR5208341	Laval	Quebec	Canada	Soil	North America
SRR5208438	Laval	Quebec	Canada	Soil	North America
SRR5208439	Laval	Quebec	Canada	Soil	North America
SRR5208440	Laval	Quebec	Canada	Soil	North America
SRR5208441	Laval	Quebec	Canada	Soil	North America
SRR5208442	Laval	Quebec	Canada	Soil	North America
SRR5208443	Laval	Quebec	Canada	Soil	North America
SRR5208444	Laval	Quebec	Canada	Soil	North America
SRR5208445	Laval	Quebec	Canada	Soil	North America
SRR5208446	Laval	Quebec	Canada	Soil	North America
SRR5208447	Laval	Quebec	Canada	Soil	North America
SRR5208448	Laval	Quebec	Canada	Soil	North America
SRR5208449	Laval	Quebec	Canada	Soil	North America
SRR5208450	Laval	Quebec	Canada	Soil	North America
SRR5208452	Laval	Quebec	Canada	Soil	North America
SRR5208453	Laval	Quebec	Canada	Soil	North America
SRR17481189	Linyi	Shandong	China	Game animal	East Asia
SRR17481188	Linyi	Shandong	China	Game animal	East Asia
SRR17509964	Lishui	Zhejiang	China	Game animal	East Asia
SRR17497044	Lishui	Zhejiang	China	Game animal	East Asia
SRR17509962	Liuzhou	Guangxi	China	Game animal	East Asia
SRR17497067	Liuzhou	Guangxi	China	Game animal	East Asia
SRR17497066	Liuzhou	Guangxi	China	Game animal	East Asia
SRR17509961	Liuzhou	Guangxi	China	Game animal	East Asia
SRR17497062	Liuzhou	Guangxi	China	Game animal	East Asia
SRR17497061	Liuzhou	Guangxi	China	Game animal	East Asia
BC-0345730484	London		United Kingdom	unlabeled buit env.	Western Europe
BC-0345722834	London		United Kingdom	unlabeled buit env.	Western Europe
BC-0345698148	London		United Kingdom	unlabeled buit env.	Western Europe
BC-0345685018	London		United Kingdom	unlabeled buit env.	Western Europe
BC-0345723773	London		United Kingdom	unlabeled buit env.	Western Europe
BC-0345698109	London		United Kingdom	unlabeled buit env.	Western Europe
BC-0345723640	London		United Kingdom	unlabeled buit env.	Western Europe
BC-0345698097	London		United Kingdom	unlabeled buit env.	Western Europe
BC-0345678604	London		United Kingdom	unlabeled buit env.	Western Europe
BC-0345723631	London		United Kingdom	unlabeled buit env.	Western Europe
BC-0345696243	London		United Kingdom	unlabeled buit env.	Western Europe
BC-0345722814	London		United Kingdom	unlabeled buit env.	Western Europe
BC-0345678363	London		United Kingdom	unlabeled buit env.	Western Europe
BC-0345722797	London		United Kingdom	unlabeled buit env.	Western Europe
BC-0345696157	London		United Kingdom	unlabeled buit env.	Western Europe
BC-0345732048	London		United Kingdom	unlabeled buit env.	Western Europe
BC-0345703150	London		United Kingdom	unlabeled buit env.	Western Europe
BC-0345696151	London		United Kingdom	unlabeled buit env.	Western Europe
BC-0345731337	London		United Kingdom	unlabeled buit env.	Western Europe
BC-0345702656	London		United Kingdom	unlabeled buit env.	Western Europe
BC-0345696150	London		United Kingdom	unlabeled buit env.	Western Europe
BC-0345731312	London		United Kingdom	unlabeled buit env.	Western Europe
BC-0345700540	London		United Kingdom	unlabeled buit env.	Western Europe
BC-0345731307	London		United Kingdom	unlabeled buit env.	Western Europe
BC-0345696149	London		United Kingdom	unlabeled buit env.	Western Europe
BC-0345700538	London		United Kingdom	unlabeled buit env.	Western Europe
BC-0345724472	London		United Kingdom	unlabeled buit env.	Western Europe
BC-0345693656	London		United Kingdom	unlabeled buit env.	Western Europe
BC-0345723792	London		United Kingdom	unlabeled buit env.	Western Europe
BC-0345700516	London		United Kingdom	unlabeled buit env.	Western Europe
BC-0345690968	London		United Kingdom	unlabeled buit env.	Western Europe
BC-0338319332	London		United Kingdom	unlabeled buit env.	Western Europe
BC-0338319293	London		United Kingdom	unlabeled buit env.	Western Europe
BC-0338319004	London		United Kingdom	unlabeled buit env.	Western Europe
BC-0338318919	London		United Kingdom	unlabeled buit env.	Western Europe
BC-0338305465	London		United Kingdom	unlabeled buit env.	Western Europe
BC-0345731294	London		United Kingdom	unlabeled buit env.	Western Europe
BC-0345724514	London		United Kingdom	unlabeled buit env.	Western Europe
BC-0345723766	London		United Kingdom	unlabeled buit env.	Western Europe
BC-0345700560	London		United Kingdom	unlabeled buit env.	Western Europe
BC-0345723658	London		United Kingdom	unlabeled buit env.	Western Europe
BC-0345698157	London		United Kingdom	Restaurant	Western Europe
BC-0345694956	London		United Kingdom	Store	Western Europe
BC-0345685878	London		United Kingdom	Store	Western Europe
BC-0345723655	London		United Kingdom	Restaurant	Western Europe
BC-0345685031	London		United Kingdom	Store	Western Europe
BC-0338319035	London		United Kingdom	Store	Western Europe
BC-0338318926	London		United Kingdom	Store	Western Europe
BC-0338319031	London		United Kingdom	Store	Western Europe
BC-0338319023	London		United Kingdom	Restaurant	Western Europe
BC-0338314973	London		United Kingdom	Restaurant	Western Europe
BC-0338318962	London		United Kingdom	Store	Western Europe
BC-0345698107	London		United Kingdom	Store	Western Europe
BC-0345693685	London		United Kingdom	Store	Western Europe
BC-0345685103	London		United Kingdom	Store	Western Europe
BC-0345723654	London		United Kingdom	Store	Western Europe
BC-0345698091	London		United Kingdom	Store	Western Europe
BC-0345690979	London		United Kingdom	Store	Western Europe
BC-0345698162	London		United Kingdom	Restaurant	Western Europe
BC-0345685028	London		United Kingdom	Store	Western Europe
BC-0345689525	London		United Kingdom	Store	Western Europe
BC-0345698078	London		United Kingdom	Restaurant	Western Europe
BC-0345698160	London		United Kingdom	Store	Western Europe
BC-0345679858	London		United Kingdom	Store	Western Europe
BC-0345696173	London		United Kingdom	Store	Western Europe
BC-0345686433	London		United Kingdom	Restaurant	Western Europe
BC-0338314958	London		United Kingdom	Store	Western Europe
BC-0338318958	London		United Kingdom	Restaurant	Western Europe
BC-0345696172	London		United Kingdom	unlabeled buit env.	Western Europe
BC-0345696152	London		United Kingdom	Store	Western Europe
BC-0345694964	London		United Kingdom	Store	Western Europe
BC-0345690988	London		United Kingdom	Store	Western Europe
BC-0338320218	London		United Kingdom	Store	Western Europe
BC-0338318900	London		United Kingdom	Store	Western Europe
BC-0338318897	London		United Kingdom	Store	Western Europe
BC-0338336600	London		United Kingdom	Store	Western Europe
BC-0338314999	London		United Kingdom	Store	Western Europe
BC-0338336566	London		United Kingdom	Store	Western Europe
BC-0338319017	London		United Kingdom	Store	Western Europe
BC-0338313769	London		United Kingdom	Store	Western Europe
BC-0345685075	London		United Kingdom	Store	Western Europe
BC-0345731488	London		United Kingdom	Store	Western Europe
BC-0345719421	London		United Kingdom	Store	Western Europe
BC-0345719382	London		United Kingdom	Store	Western Europe
BC-0338305525	London		United Kingdom	Store	Western Europe
BC-0338319012	London		United Kingdom	Store	Western Europe
BC-0338319007	London		United Kingdom	Store	Western Europe
BC-0338319003	London		United Kingdom	Store	Western Europe
BC-0345724496	London		United Kingdom	Store	Western Europe
BC-0345724494	London		United Kingdom	Store	Western Europe
BC-0345724493	London		United Kingdom	Store	Western Europe
BC-0345724491	London		United Kingdom	Store	Western Europe
BC-0345724490	London		United Kingdom	Restaurant	Western Europe
BC-0345724489	London		United Kingdom	Restaurant	Western Europe
BC-0345724483	London		United Kingdom	Store	Western Europe
BC-0345724482	London		United Kingdom	Store	Western Europe
BC-0345724481	London		United Kingdom	Store	Western Europe
BC-0345724475	London		United Kingdom	Store	Western Europe
BC-0345724473	London		United Kingdom	Store	Western Europe
BC-0345723695	London		United Kingdom	Store	Western Europe
BC-0345723693	London		United Kingdom	Store	Western Europe
BC-0345723687	London		United Kingdom	Store	Western Europe
BC-0345723683	London		United Kingdom	Store	Western Europe
BC-0345723681	London		United Kingdom	Restaurant	Western Europe
BC-0345723678	London		United Kingdom	Restaurant	Western Europe
BC-0345723673	London		United Kingdom	Store	Western Europe
BC-0338319612	London		United Kingdom	Restaurant	Western Europe
BC-0345723670	London		United Kingdom	Store	Western Europe
BC-0338319030	London		United Kingdom	Store	Western Europe
BC-0345723665	London		United Kingdom	Store	Western Europe
BC-0338319001	London		United Kingdom	Restaurant	Western Europe
BC-0345723662	London		United Kingdom	Store	Western Europe
BC-0338314980	London		United Kingdom	Store	Western Europe
BC-0338314950	London		United Kingdom	Store	Western Europe
BC-0345723648	London		United Kingdom	Store	Western Europe
BC-0345723647	London		United Kingdom	Restaurant	Western Europe
BC-0345724534	London		United Kingdom	Store	Western Europe
BC-0338314996	London		United Kingdom	Store	Western Europe
BC-0338319146	London		United Kingdom	Restaurant	Western Europe
BC-0338313772	London		United Kingdom	Store	Western Europe
BC-0338319048	London		United Kingdom	Store	Western Europe
BC-0338313770	London		United Kingdom	Store	Western Europe
BC-0338319032	London		United Kingdom	Store	Western Europe
BC-0345724526	London		United Kingdom	Store	Western Europe
BC-0345724525	London		United Kingdom	Store	Western Europe
BC-0345724521	London		United Kingdom	Store	Western Europe
BC-0345724513	London		United Kingdom	Store	Western Europe
BC-0345724512	London		United Kingdom	Restaurant	Western Europe
BC-0345724511	London		United Kingdom	Store	Western Europe
BC-0345724507	London		United Kingdom	Store	Western Europe
SRR17497123	Longyan	Fujian	China	Game animal	East Asia
SRR17509985	Longyan	Fujian	China	Game animal	East Asia
SRR17481187	Lvliang	Shanxi	China	Game animal	East Asia
SRR17481186	Lvliang	Shanxi	China	Game animal	East Asia
SRR17481185	Lvliang	Shanxi	China	Game animal	East Asia
SRR17497080	Maoming	Guangdong	China	Game animal	East Asia
SRR17497079	Maoming	Guangdong	China	Game animal	East Asia
SRR11563379	Maridalen valley	Oslo	Norway	Soil	Northern Europe
SRR8549458	Maridalen valley	Oslo	Norway	Soil	Northern Europe
SRR8549460	Maridalen valley	Oslo	Norway	Soil	Northern Europe
SRR8549461	Maridalen valley	Oslo	Norway	Soil	Northern Europe
SRR8549462	Maridalen valley	Oslo	Norway	Soil	Northern Europe
SRR8549463	Maridalen valley	Oslo	Norway	Soil	Northern Europe
SRR8549464	Maridalen valley	Oslo	Norway	Soil	Northern Europe
SRR8549465	Maridalen valley	Oslo	Norway	Soil	Northern Europe
SRR8549472	Maridalen valley	Oslo	Norway	Soil	Northern Europe
SRR8549473	Maridalen valley	Oslo	Norway	Soil	Northern Europe
SRR8549474	Maridalen valley	Oslo	Norway	Soil	Northern Europe
SRR8549476	Maridalen valley	Oslo	Norway	Soil	Northern Europe
SRR8549477	Maridalen valley	Oslo	Norway	Soil	Northern Europe
SRR8549478	Maridalen valley	Oslo	Norway	Soil	Northern Europe
SRR8549479	Maridalen valley	Oslo	Norway	Soil	Northern Europe
SRR8549480	Maridalen valley	Oslo	Norway	Soil	Northern Europe
SRR8549481	Maridalen valley	Oslo	Norway	Soil	Northern Europe
SRR8549482	Maridalen valley	Oslo	Norway	Soil	Northern Europe
SRR8549483	Maridalen valley	Oslo	Norway	Soil	Northern Europe
SRR8549876	Maridalen valley	Oslo	Norway	Soil	Northern Europe
SRR8549877	Maridalen valley	Oslo	Norway	Soil	Northern Europe
SRR8549878	Maridalen valley	Oslo	Norway	Soil	Northern Europe
SRR8549879	Maridalen valley	Oslo	Norway	Soil	Northern Europe
SRR8549880	Maridalen valley	Oslo	Norway	Soil	Northern Europe
SRR8549881	Maridalen valley	Oslo	Norway	Soil	Northern Europe
SRR8549882	Maridalen valley	Oslo	Norway	Soil	Northern Europe
SRR8549883	Maridalen valley	Oslo	Norway	Soil	Northern Europe
SRR8549884	Maridalen valley	Oslo	Norway	Soil	Northern Europe
SRR8549886	Maridalen valley	Oslo	Norway	Soil	Northern Europe
SRR8549887	Maridalen valley	Oslo	Norway	Soil	Northern Europe
SRR8549889	Maridalen valley	Oslo	Norway	Soil	Northern Europe
SRR8549897	Maridalen valley	Oslo	Norway	Soil	Northern Europe
SRR8549898	Maridalen valley	Oslo	Norway	Soil	Northern Europe
SRR8549899	Maridalen valley	Oslo	Norway	Soil	Northern Europe
SRR8549900	Maridalen valley	Oslo	Norway	Soil	Northern Europe
SRR8549901	Maridalen valley	Oslo	Norway	Soil	Northern Europe
SRR8549903	Maridalen valley	Oslo	Norway	Soil	Northern Europe
SRR8549913	Maridalen valley	Oslo	Norway	Soil	Northern Europe
SRR8549914	Maridalen valley	Oslo	Norway	Soil	Northern Europe
SRR8549995	Maridalen valley	Oslo	Norway	Soil	Northern Europe
SRR10849374	Morgantown	West Virginia	United States	Soil	North America
SRR10849399	Morgantown	West Virginia	United States	Soil	North America
SRR10849400	Morgantown	West Virginia	United States	Soil	North America
SRR10849402	Morgantown	West Virginia	United States	Soil	North America
SRR10849403	Morgantown	West Virginia	United States	Soil	North America
SRR10849404	Morgantown	West Virginia	United States	Soil	North America
SRR10849649	Morgantown	West Virginia	United States	Soil	North America
SRR10849655	Morgantown	West Virginia	United States	Soil	North America
SRR10849743	Morgantown	West Virginia	United States	Soil	North America
SRR10849744	Morgantown	West Virginia	United States	Soil	North America
SRR10849745	Morgantown	West Virginia	United States	Soil	North America
SRR10849803	Morgantown	West Virginia	United States	Soil	North America
SRR10849807	Morgantown	West Virginia	United States	Soil	North America
SRR10849936	Morgantown	West Virginia	United States	Soil	North America
SRR10849938	Morgantown	West Virginia	United States	Soil	North America
SRR10849941	Morgantown	West Virginia	United States	Soil	North America
SRR10904363	Morgantown	West Virginia	United States	Soil	North America
SRR10904364	Morgantown	West Virginia	United States	Soil	North America
SRR10904365	Morgantown	West Virginia	United States	Soil	North America
SRR12334071	Morgantown	West Virginia	United States	Soil	North America
SRR12334072	Morgantown	West Virginia	United States	Soil	North America
SRR12610547	Morgantown	West Virginia	United States	Soil	North America
SRR12610550	Morgantown	West Virginia	United States	Soil	North America
SRR12610551	Morgantown	West Virginia	United States	Soil	North America
SRR12610560	Morgantown	West Virginia	United States	Soil	North America
SRR12610579	Morgantown	West Virginia	United States	Soil	North America
SRR14011087	Nagano		Japan	Freshwater	East Asia
SRR14011088	Nagano		Japan	Freshwater	East Asia
SRR14011089	Nagano		Japan	Freshwater	East Asia
SRR14011090	Nagano		Japan	Freshwater	East Asia
SRR14011091	Nagano		Japan	Freshwater	East Asia
SRR14011092	Nagano		Japan	Freshwater	East Asia
SRR14011093	Nagano		Japan	Freshwater	East Asia
SRR14011094	Nagano		Japan	Freshwater	East Asia
SRR14011095	Nagano		Japan	Freshwater	East Asia
SRR14011096	Nagano		Japan	Freshwater	East Asia
SRR14011097	Nagano		Japan	Freshwater	East Asia
SRR14011098	Nagano		Japan	Freshwater	East Asia
SRR17497101	Nanjing	Jiangsu	China	Game animal	East Asia
SRR17497100	Nanjing	Jiangsu	China	Game animal	East Asia
SRR17497050	Nanjing	Jiangsu	China	Game animal	East Asia
SRR17497049	Nanjing	Jiangsu	China	Game animal	East Asia
SRR17509963	Nanjing	Jiangsu	China	Game animal	East Asia
SRR17497041	Nanjing	Jiangsu	China	Game animal	East Asia
SRR17497083	Nanjing	Jiangsu	China	Game animal	East Asia
SRR17497082	Nanjing	Jiangsu	China	Game animal	East Asia
SRR17481181	Nanjing	Jiangsu	China	Game animal	East Asia
SRR17481180	Nanjing	Jiangsu	China	Game animal	East Asia
SRR17481241	Nanning	Guangxi	China	Game animal	East Asia
SRR17481238	Nanning	Guangxi	China	Game animal	East Asia
SRR17481237	Nanning	Guangxi	China	Game animal	East Asia
SRR17509943	Nanning	Guangxi	China	Game animal	East Asia
SRR17509942	Nanning	Guangxi	China	Game animal	East Asia
SRR17509941	Nanning	Guangxi	China	Game animal	East Asia
SRR17481236	Nanning	Guangxi	China	Game animal	East Asia
SRR17497118	Nanping	Fujian	China	Game animal	East Asia
SRR17497117	Nanping	Fujian	China	Game animal	East Asia
SRR18771684	Narragansett Bay	Rhode Island	United States	Freshwater	East Asia
SRR18771686	Narragansett Bay	Rhode Island	United States	Freshwater	East Asia
SRR18771830	Narragansett Bay	Rhode Island	United States	Freshwater	East Asia
SRR18774404	Narragansett Bay	Rhode Island	United States	Freshwater	East Asia
SRR18774405	Narragansett Bay	Rhode Island	United States	Freshwater	East Asia
SRR18774406	Narragansett Bay	Rhode Island	United States	Freshwater	East Asia
SRR18774407	Narragansett Bay	Rhode Island	United States	Freshwater	East Asia
SRR18776295	Narragansett Bay	Rhode Island	United States	Freshwater	East Asia
SRR18776302	Narragansett Bay	Rhode Island	United States	Freshwater	East Asia
SRR18776303	Narragansett Bay	Rhode Island	United States	Freshwater	East Asia
SRR18776333	Narragansett Bay	Rhode Island	United States	Freshwater	East Asia
SRR11829677	Nebraska		United States	Soil	East Asia
SRR11829678	Nebraska		United States	Soil	East Asia
SRR11829679	Nebraska		United States	Soil	East Asia
SRR11829739	Nebraska		United States	Soil	East Asia
SRR17481212	Ningbo	Zhejiang	China	Game animal	East Asia
SRR17509929	Ningbo	Zhejiang	China	Game animal	East Asia
SRR17481202	Ningbo	Zhejiang	China	Game animal	East Asia
BC-0345299303	Nonoichi		Japan	Station	East Asia
BC-0345300257	Nonoichi		Japan	Station	East Asia
BC-0345300517	Nonoichi		Japan	Station	East Asia
BC-0345299577	Nonoichi		Japan	Station	East Asia
BC-0345299575	Nonoichi		Japan	Station	East Asia
BC-0345300480	Nonoichi		Japan	Station	East Asia
BC-0345299506	Nonoichi		Japan	Station	East Asia
BC-0345300461	Nonoichi		Japan	Station	East Asia
BC-0345299149	Nonoichi		Japan	Station	East Asia
BC-0345300460	Nonoichi		Japan	Station	East Asia
BC-0345299304	Nonoichi		Japan	Station	East Asia
BC-0345297694	Nonoichi		Japan	Station	East Asia
BC-0345296158	Nonoichi		Japan	Station	East Asia
BC-0345298877	Nonoichi		Japan	Station	East Asia
BC-0345299118	Nonoichi		Japan	Station	East Asia
BC-0345298339	Nonoichi		Japan	Station	East Asia
BC-0345299117	Nonoichi		Japan	Station	East Asia
BC-0345278438	Nonoichi		Japan	Station	East Asia
BC-0345296163	Nonoichi		Japan	Station	East Asia
BC-0345272068	Nonoichi		Japan	Station	East Asia
BC-0345272061	Nonoichi		Japan	Station	East Asia
BC-0345272136	Nonoichi		Japan	Station	East Asia
BC-0345272119	Nonoichi		Japan	Station	East Asia
BC-0345272079	Nonoichi		Japan	Station	East Asia
BC-0345299193	Nonoichi		Japan	Station	East Asia
BC-0345297733	Nonoichi		Japan	Station	East Asia
BC-0345297728	Nonoichi		Japan	unlabeled buit env.	East Asia
BC-0345299174	Nonoichi		Japan	Station	East Asia
BC-0345300547	Nonoichi		Japan	Station	East Asia
BC-0345296670	Nonoichi		Japan	Station	East Asia
BC-0345299545	Nonoichi		Japan	Station	East Asia
BC-0345299135	Nonoichi		Japan	Station	East Asia
BC-0345296518	Nonoichi		Japan	Station	East Asia
BC-0345297676	Nonoichi		Japan	Station	East Asia
BC-0345298860	Nonoichi		Japan	Station	East Asia
BC-0345299508	Nonoichi		Japan	Station	East Asia
BC-0345297432	Nonoichi		Japan	Station	East Asia
BC-0345299289	Nonoichi		Japan	Station	East Asia
BC-0345296503	Nonoichi		Japan	Station	East Asia
BC-0345299203	Nonoichi		Japan	Station	East Asia
BC-0345297736	Nonoichi		Japan	Station	East Asia
BC-0345296697	Nonoichi		Japan	Station	East Asia
BC-0345296447	Nonoichi		Japan	Station	East Asia
BC-0345296437	Nonoichi		Japan	Station	East Asia
BC-0345278401	Nonoichi		Japan	Station	East Asia
BC-0345296222	Nonoichi		Japan	Station	East Asia
BC-0345278481	Nonoichi		Japan	Station	East Asia
BC-0345272101	Nonoichi		Japan	Station	East Asia
SRR11679699	Petersham	Massachusetts	United States	Soil	North America
SRR11679700	Petersham	Massachusetts	United States	Soil	North America
SRR11679701	Petersham	Massachusetts	United States	Soil	North America
SRR11679702	Petersham	Massachusetts	United States	Soil	North America
SRR11679753	Petersham	Massachusetts	United States	Soil	North America
SRR11679754	Petersham	Massachusetts	United States	Soil	North America
SRR11679817	Petersham	Massachusetts	United States	Soil	North America
SRR11679818	Petersham	Massachusetts	United States	Soil	North America
SRR7531806	Petersham	Massachusetts	United States	Soil	North America
SRR7531807	Petersham	Massachusetts	United States	Soil	North America
SRR7532699	Petersham	Massachusetts	United States	Soil	North America
SRR7532745	Petersham	Massachusetts	United States	Soil	North America
SRR7533101	Petersham	Massachusetts	United States	Soil	North America
SRR7533265	Petersham	Massachusetts	United States	Soil	North America
SRR7533591	Petersham	Massachusetts	United States	Soil	North America
SRR7533622	Petersham	Massachusetts	United States	Soil	North America
SRR7533630	Petersham	Massachusetts	United States	Soil	North America
SRR7534265	Petersham	Massachusetts	United States	Soil	North America
SRR7534623	Petersham	Massachusetts	United States	Soil	North America
SRR7534934	Petersham	Massachusetts	United States	Soil	North America
SRR7534944	Petersham	Massachusetts	United States	Soil	North America
SRR7535021	Petersham	Massachusetts	United States	Soil	North America
SRR7535022	Petersham	Massachusetts	United States	Soil	North America
SRR7535303	Petersham	Massachusetts	United States	Soil	North America
SRR7535304	Petersham	Massachusetts	United States	Soil	North America
SRR7535525	Petersham	Massachusetts	United States	Soil	North America
SRR7535528	Petersham	Massachusetts	United States	Soil	North America
SRR7536466	Petersham	Massachusetts	United States	Soil	North America
SRR7536883	Petersham	Massachusetts	United States	Soil	North America
SRR7537439	Petersham	Massachusetts	United States	Soil	North America
SRR7537488	Petersham	Massachusetts	United States	Soil	North America
SRR7538188	Petersham	Massachusetts	United States	Soil	North America
SRR7538189	Petersham	Massachusetts	United States	Soil	North America
SRR7538850	Petersham	Massachusetts	United States	Soil	North America
SRR7539006	Petersham	Massachusetts	United States	Soil	North America
SRR7539092	Petersham	Massachusetts	United States	Soil	North America
SRR7539306	Petersham	Massachusetts	United States	Soil	North America
SRR7540203	Petersham	Massachusetts	United States	Soil	North America
SRR7540211	Petersham	Massachusetts	United States	Soil	North America
SRR7540365	Petersham	Massachusetts	United States	Soil	North America
SRR7540366	Petersham	Massachusetts	United States	Soil	North America
SRR7540567	Petersham	Massachusetts	United States	Soil	North America
SRR7540568	Petersham	Massachusetts	United States	Soil	North America
SRR7540947	Petersham	Massachusetts	United States	Soil	North America
SRR7540954	Petersham	Massachusetts	United States	Soil	North America
SRR7541036	Petersham	Massachusetts	United States	Soil	North America
SRR7541278	Petersham	Massachusetts	United States	Soil	North America
SRR7541460	Petersham	Massachusetts	United States	Soil	North America
SRR7551019	Petersham	Massachusetts	United States	Soil	North America
SRR8535381	Petersham	Massachusetts	United States	Soil	North America
SRR8535382	Petersham	Massachusetts	United States	Soil	North America
SRR17509926	Pingdingshan	Henan	China	Game animal	East Asia
SRR17509925	Pingdingshan	Henan	China	Game animal	East Asia
SRR17481197	Pingdingshan	Henan	China	Game animal	East Asia
SRR17481196	Pingdingshan	Henan	China	Game animal	East Asia
SRR17481194	Pingdingshan	Henan	China	Game animal	East Asia
SRR17481193	Pingdingshan	Henan	China	Game animal	East Asia
SRR17481192	Pingdingshan	Henan	China	Game animal	East Asia
SRR17481191	Pingdingshan	Henan	China	Game animal	East Asia
SRR17481190	Pingdingshan	Henan	China	Game animal	East Asia
SRR17497099	Pingxiang	Jiangxi	China	Game animal	East Asia
SRR17497098	Pingxiang	Jiangxi	China	Game animal	East Asia
SRR17497096	Pingxiang	Jiangxi	China	Game animal	East Asia
SRR17497095	Pingxiang	Jiangxi	China	Game animal	East Asia
SRR17509972	Pingxiang	Jiangxi	China	Game animal	East Asia
SRR17509971	Pingxiang	Jiangxi	China	Game animal	East Asia
SRR17509969	Pingxiang	Jiangxi	China	Game animal	East Asia
SRR17509968	Pingxiang	Jiangxi	China	Game animal	East Asia
SRR17509967	Pingxiang	Jiangxi	China	Game animal	East Asia
SRR17481203	Pingxiang	Jiangxi	China	Game animal	East Asia
SRR17481226	Qinhuangdao	Hebei	China	Game animal	East Asia
SRR17509936	Qinhuangdao	Hebei	China	Game animal	East Asia
SRR8554513	Risofladan	Vaasa	Finland	Soil	Northern Europe
SRR8554514	Risofladan	Vaasa	Finland	Soil	Northern Europe
SRR8554642	Risofladan	Vaasa	Finland	Soil	Northern Europe
SRR8554647	Risofladan	Vaasa	Finland	Soil	Northern Europe
SRR8554648	Risofladan	Vaasa	Finland	Soil	Northern Europe
SRR8554649	Risofladan	Vaasa	Finland	Soil	Northern Europe
SRR8554650	Risofladan	Vaasa	Finland	Soil	Northern Europe
SRR8554651	Risofladan	Vaasa	Finland	Soil	Northern Europe
SRR8554652	Risofladan	Vaasa	Finland	Soil	Northern Europe
SRR11827185	Rowley	Massachusetts	United States	Sediment	North America
SRR11827438	Rowley	Massachusetts	United States	Sediment	North America
SRR11827439	Rowley	Massachusetts	United States	Sediment	North America
SRR11827440	Rowley	Massachusetts	United States	Sediment	North America
SRR11827441	Rowley	Massachusetts	United States	Sediment	North America
SRR11828456	Rowley	Massachusetts	United States	Sediment	North America
SRR11828458	Rowley	Massachusetts	United States	Sediment	North America
SRR11828459	Rowley	Massachusetts	United States	Sediment	North America
SRR11828460	Rowley	Massachusetts	United States	Sediment	North America
SRR11828594	Rowley	Massachusetts	United States	Sediment	North America
SRR11828805	Rowley	Massachusetts	United States	Sediment	North America
SRR11828806	Rowley	Massachusetts	United States	Sediment	North America
SRR11828807	Rowley	Massachusetts	United States	Sediment	North America
SRR11828891	Rowley	Massachusetts	United States	Sediment	North America
SRR11828897	Rowley	Massachusetts	United States	Sediment	North America
SRR11828898	Rowley	Massachusetts	United States	Sediment	North America
SRR11828900	Rowley	Massachusetts	United States	Sediment	North America
SRR11828902	Rowley	Massachusetts	United States	Sediment	North America
SRR11828958	Rowley	Massachusetts	United States	Sediment	North America
SRR11828959	Rowley	Massachusetts	United States	Sediment	North America
SRR11828993	Rowley	Massachusetts	United States	Sediment	North America
SRR11828994	Rowley	Massachusetts	United States	Sediment	North America
SRR11829001	Rowley	Massachusetts	United States	Sediment	North America
SRR11829099	Rowley	Massachusetts	United States	Sediment	North America
SRR11829101	Rowley	Massachusetts	United States	Sediment	North America
SRR11829103	Rowley	Massachusetts	United States	Sediment	North America
SRR11829105	Rowley	Massachusetts	United States	Sediment	North America
SRR11829142	Rowley	Massachusetts	United States	Sediment	North America
SRR11829143	Rowley	Massachusetts	United States	Sediment	North America
SRR11829144	Rowley	Massachusetts	United States	Sediment	North America
SRR11829260	Rowley	Massachusetts	United States	Sediment	North America
SRR11829261	Rowley	Massachusetts	United States	Sediment	North America
SRR11829331	Rowley	Massachusetts	United States	Sediment	North America
SRR11829332	Rowley	Massachusetts	United States	Sediment	North America
SRR17497116	Sanming	Fujian	China	Game animal	East Asia
SRR17497072	Sanming	Fujian	China	Game animal	East Asia
BC-0361057076	Santiago		Chile	Station	South America
BC-0361053712	Santiago		Chile	unlabeled buit env.	South America
BC-0361057038	Santiago		Chile	Station	South America
BC-0345807110	Santiago		Chile	Station	South America
BC-0361057023	Santiago		Chile	Station	South America
BC-0361057008	Santiago		Chile	Market	South America
BC-0361056946	Santiago		Chile	Office	South America
BC-0361054290	Santiago		Chile	Station	South America
BC-0361082863	Santiago		Chile	Market	South America
BC-0361054258	Santiago		Chile	Station	South America
BC-0361078892	Santiago		Chile	Office	South America
BC-0361053753	Santiago		Chile	Station	South America
BC-0345799029	Santiago		Chile	Bank	South America
BC-0345798991	Santiago		Chile	Station	South America
BC-0361078455	Santiago		Chile	Market	South America
BC-0361053744	Santiago		Chile	Office	South America
[truncated: 1,328 more rows]
