# Supplementary material for: Diversity and Distinctive Characteristics of the Global RNA Virome in Urban Environments
Source: Research Square preprint supplement (doi:10.21203/rs.3.rs-6735172/v1), 2025-06-26
Supplement: Supplementary file 11 [file bf27e73a7091ee43fec562d5.xlsx]

## Sheet: Supplementary Table 8
Host assignment by by matching the spacers in the IMG database to the viral contigs
Spacer_id	RCR95	Virus_Phylum	Spacer_lineage	Alignment length	Mismatch	e-value
100008727	SRR11829261|k141_152797_flag=1_multi=151.2792_len=2526	Kitrinoviricota	d__Bacteria;p__Firmicutes_A;c__Clostridia;o__Peptostreptococcales;f__Peptostreptococcaceae;g__Clostridioides;s__Clostridioides difficile	25	0	4.29e-05
100009104	SRR11829261|k141_152797_flag=1_multi=151.2792_len=2526	Kitrinoviricota	d__Bacteria;p__Firmicutes_A;c__Clostridia;o__Peptostreptococcales;f__Peptostreptococcaceae;g__Clostridioides;s__Clostridioides difficile	25	0	4.29e-05
100017928	SRR11828459|k141_18049_flag=1_multi=4.0000_len=1029	Duplornaviricota	d__Bacteria;p__Firmicutes_A;c__Clostridia;o__Peptostreptococcales;f__Peptostreptococcaceae;g__Clostridioides;s__Clostridioides difficile	29	1	1.11e-05
100035329	SRR11828459|k141_18049_flag=1_multi=4.0000_len=1029	Duplornaviricota	d__Bacteria;p__Firmicutes_A;c__Clostridia;o__Peptostreptococcales;f__Peptostreptococcaceae;g__Clostridioides;s__Clostridioides difficile	29	1	1.11e-05
100036296	SRR11829101|k141_170810_flag=1_multi=15.0000_len=5608	Kitrinoviricota	d__Bacteria;p__Firmicutes_A;c__Clostridia;o__Peptostreptococcales;f__Peptostreptococcaceae;g__Clostridioides;s__Clostridioides difficile	30	0	1.11e-05
100036537	SRR11829261|k141_152797_flag=1_multi=151.2792_len=2526	Kitrinoviricota	d__Bacteria;p__Firmicutes_A;c__Clostridia;o__Peptostreptococcales;f__Peptostreptococcaceae;g__Clostridioides;s__Clostridioides difficile	25	0	4.29e-05
100037105	SRR11829099|k141_172493_flag=3_multi=17.0047_len=3780	Negarnaviricota	d__Bacteria;p__Fusobacteriota;c__Fusobacteriia;o__Fusobacteriales;f__Fusobacteriaceae;g__Fusobacterium_B;s__Fusobacterium_B sp900554885	31	1	0.000226
100037336	SRR11076227|k141_564324_flag=1_multi=26.0000_len=9102	Negarnaviricota	d__Bacteria;p__Firmicutes;c__Bacilli;o__Lactobacillales;f__Streptococcaceae;g__Streptococcus;s__Streptococcus agalactiae	27	1	9.26e-05
100049125	SRR11648413|k141_155839_flag=0_multi=32.5524_len=1714	Lenarviricota	d__Bacteria;p__Proteobacteria;c__Gammaproteobacteria;o__Enterobacterales;f__Enterobacteriaceae;g__Salmonella;s__Salmonella enterica	23	0	0.000333
100051579	SRR11828459|k141_18049_flag=1_multi=4.0000_len=1029	Duplornaviricota	d__Bacteria;p__Firmicutes_A;c__Clostridia;o__Peptostreptococcales;f__Peptostreptococcaceae;g__Clostridioides;s__Clostridioides difficile	29	1	1.11e-05
100056629	SRR11827439|k141_109350_flag=1_multi=4.0000_len=2497	Duplornaviricota	d__Bacteria;p__Firmicutes_A;c__Clostridia;o__Peptostreptococcales;f__Peptostreptococcaceae;g__Clostridioides;s__Clostridioides difficile	26	1	0.000481
100058171	SRR11648413|k141_155839_flag=0_multi=32.5524_len=1714	Lenarviricota	d__Bacteria;p__Proteobacteria;c__Gammaproteobacteria;o__Enterobacterales;f__Enterobacteriaceae;g__Salmonella;s__Salmonella enterica	23	0	0.000333
100058210	SRR11648413|k141_155839_flag=0_multi=32.5524_len=1714	Lenarviricota	d__Bacteria;p__Proteobacteria;c__Gammaproteobacteria;o__Enterobacterales;f__Enterobacteriaceae;g__Salmonella;s__Salmonella enterica	23	0	0.000333
100058900	SRR11829261|k141_152797_flag=1_multi=151.2792_len=2526	Kitrinoviricota	d__Bacteria;p__Firmicutes_A;c__Clostridia;o__Peptostreptococcales;f__Peptostreptococcaceae;g__Clostridioides;s__Clostridioides difficile	25	0	4.29e-05
100060701	SRR11828459|k141_18049_flag=1_multi=4.0000_len=1029	Duplornaviricota	d__Bacteria;p__Firmicutes_A;c__Clostridia;o__Peptostreptococcales;f__Peptostreptococcaceae;g__Clostridioides;s__Clostridioides difficile	29	1	1.11e-05
100063012	SRR11828459|k141_18049_flag=1_multi=4.0000_len=1029	Duplornaviricota	d__Bacteria;p__Firmicutes_A;c__Clostridia;o__Peptostreptococcales;f__Peptostreptococcaceae;g__Clostridioides;s__Clostridioides difficile	29	1	1.11e-05
100068580	SRR14530885|k119_555_flag=1_multi=7.0000_len=3964	Unclassified	d__Archaea;p__Halobacteriota;c__Halobacteria;o__Halobacteriales;f__Haladaptataceae;g__Halorussus;s__Halorussus sp004087835	26	1	0.000444
100070388	SRR11829261|k141_152797_flag=1_multi=151.2792_len=2526	Kitrinoviricota	d__Bacteria;p__Firmicutes_A;c__Clostridia;o__Peptostreptococcales;f__Peptostreptococcaceae;g__Clostridioides;s__Clostridioides difficile	25	0	4.29e-05
100070551	SRR11076227|k141_564324_flag=1_multi=26.0000_len=9102	Negarnaviricota	d__Bacteria;p__Firmicutes;c__Bacilli;o__Lactobacillales;f__Streptococcaceae;g__Streptococcus;s__Streptococcus agalactiae	27	1	9.26e-05
100072017	SRR11648413|k141_155839_flag=0_multi=32.5524_len=1714	Lenarviricota	d__Bacteria;p__Proteobacteria;c__Gammaproteobacteria;o__Enterobacterales;f__Enterobacteriaceae;g__Salmonella;s__Salmonella enterica	23	0	0.000333
100074611	SRR11829332|k141_129809_flag=1_multi=41.0000_len=2496	Unclassified	d__Bacteria;p__Firmicutes_A;c__Clostridia;o__Tissierellales;f__SIT17;g__Senegalia;s__Senegalia sp016820635	27	1	0.000134
100083144	SRR11828459|k141_18049_flag=1_multi=4.0000_len=1029	Duplornaviricota	d__Bacteria;p__Firmicutes_A;c__Clostridia;o__Peptostreptococcales;f__Peptostreptococcaceae;g__Clostridioides;s__Clostridioides difficile	29	1	1.11e-05
100088688	SRR11829261|k141_152797_flag=1_multi=151.2792_len=2526	Kitrinoviricota	d__Bacteria;p__Firmicutes_A;c__Clostridia;o__Peptostreptococcales;f__Peptostreptococcaceae;g__Clostridioides;s__Clostridioides difficile	25	0	4.29e-05
100100613	SRR11829144|k141_41746_flag=1_multi=10.0000_len=6681	Pisuviricota	d__Bacteria;p__Proteobacteria;c__Gammaproteobacteria;o__Enterobacterales;f__Enterobacteriaceae;g__Salmonella;s__Salmonella enterica	25	0	2.57e-05
100101306	SRR11076227|k141_564324_flag=1_multi=26.0000_len=9102	Negarnaviricota	d__Bacteria;p__Firmicutes;c__Bacilli;o__Lactobacillales;f__Streptococcaceae;g__Streptococcus;s__Streptococcus agalactiae	27	1	9.26e-05
100106718	SRR11648413|k141_155839_flag=0_multi=32.5524_len=1714	Lenarviricota	d__Bacteria;p__Proteobacteria;c__Gammaproteobacteria;o__Enterobacterales;f__Enterobacteriaceae;g__Salmonella;s__Salmonella enterica	23	0	0.000333
100113936	SRR11828459|k141_18049_flag=1_multi=4.0000_len=1029	Duplornaviricota	d__Bacteria;p__Firmicutes_A;c__Clostridia;o__Peptostreptococcales;f__Peptostreptococcaceae;g__Clostridioides;s__Clostridioides difficile	29	1	1.11e-05
100115999	SRR11828897|k141_26996_flag=1_multi=5.0000_len=2618	Unclassified	d__Bacteria;p__Nitrospirota;c__Thermodesulfovibrionia;o__Thermodesulfovibrionales;f__Magnetobacteriaceae;g__Magnetobacterium;s__Magnetobacterium sp002753685	26	1	0.000481
100121094	SRR11648413|k141_155839_flag=0_multi=32.5524_len=1714	Lenarviricota	d__Bacteria;p__Proteobacteria;c__Gammaproteobacteria;o__Enterobacterales;f__Enterobacteriaceae;g__Salmonella;s__Salmonella enterica	23	0	0.000333
100121851	SRR11829261|k141_152797_flag=1_multi=151.2792_len=2526	Kitrinoviricota	d__Bacteria;p__Firmicutes_A;c__Clostridia;o__Peptostreptococcales;f__Peptostreptococcaceae;g__Clostridioides;s__Clostridioides difficile	25	0	4.29e-05
100129889	SRR11648413|k141_155839_flag=0_multi=32.5524_len=1714	Lenarviricota	d__Bacteria;p__Proteobacteria;c__Gammaproteobacteria;o__Enterobacterales;f__Enterobacteriaceae;g__Salmonella;s__Salmonella enterica	23	0	0.000333
100129922	SRR11648413|k141_155839_flag=0_multi=32.5524_len=1714	Lenarviricota	d__Bacteria;p__Proteobacteria;c__Gammaproteobacteria;o__Enterobacterales;f__Enterobacteriaceae;g__Salmonella;s__Salmonella enterica	23	0	0.000333
100130167	SRR7539006|k141_895006_flag=1_multi=5.0000_len=1941	Lenarviricota	d__Bacteria;p__Firmicutes;c__Bacilli;o__Lactobacillales;f__Listeriaceae;g__Listeria;s__Listeria monocytogenes	28	0	8.23e-05
100136175	SRR11828459|k141_18049_flag=1_multi=4.0000_len=1029	Duplornaviricota	d__Bacteria;p__Firmicutes_A;c__Clostridia;o__Peptostreptococcales;f__Peptostreptococcaceae;g__Clostridioides;s__Clostridioides difficile	29	1	1.11e-05
100137571	SRR7535021|k141_97098_flag=1_multi=21.0000_len=7304	Pisuviricota	d__Bacteria;p__Actinobacteriota;c__Actinomycetia;o__Streptomycetales;f__Streptomycetaceae;g__Streptomyces;s__Streptomyces fagopyri	27	1	0.000648
100137571	SRR11678561|k141_549_flag=1_multi=16.0000_len=4400	Kitrinoviricota	d__Bacteria;p__Actinobacteriota;c__Actinomycetia;o__Streptomycetales;f__Streptomycetaceae;g__Streptomyces;s__Streptomyces fagopyri	27	1	0.000648
100137571	SRR11829144|k141_21356_flag=1_multi=12.0000_len=4379	Unclassified	d__Bacteria;p__Actinobacteriota;c__Actinomycetia;o__Streptomycetales;f__Streptomycetaceae;g__Streptomyces;s__Streptomyces fagopyri	27	1	0.000648
100137571	SRR7004714|k141_6247_flag=1_multi=9.0000_len=5004	Pisuviricota	d__Bacteria;p__Actinobacteriota;c__Actinomycetia;o__Streptomycetales;f__Streptomycetaceae;g__Streptomyces;s__Streptomyces fagopyri	27	1	0.000648
100137571	SRR11647985|k141_31767_flag=1_multi=10.0000_len=5731	Pisuviricota	d__Bacteria;p__Actinobacteriota;c__Actinomycetia;o__Streptomycetales;f__Streptomycetaceae;g__Streptomyces;s__Streptomyces fagopyri	28	1	0.00018
100137571	SRR18771337|k141_14492_flag=1_multi=63.0000_len=9195	Pisuviricota	d__Bacteria;p__Actinobacteriota;c__Actinomycetia;o__Streptomycetales;f__Streptomycetaceae;g__Streptomyces;s__Streptomyces fagopyri	27	1	0.000648
100137571	SRR5829904|k141_59302_flag=1_multi=4.0000_len=3072	Kitrinoviricota	d__Bacteria;p__Actinobacteriota;c__Actinomycetia;o__Streptomycetales;f__Streptomycetaceae;g__Streptomyces;s__Streptomyces fagopyri	27	1	0.000648
100137571	SRR12632507|k141_170124_flag=1_multi=18.0000_len=6182	Pisuviricota	d__Bacteria;p__Actinobacteriota;c__Actinomycetia;o__Streptomycetales;f__Streptomycetaceae;g__Streptomyces;s__Streptomyces fagopyri	29	1	5.01e-05
100137571	SRR5829963|k141_684416_flag=1_multi=32.7821_len=3960	Unclassified	d__Bacteria;p__Actinobacteriota;c__Actinomycetia;o__Streptomycetales;f__Streptomycetaceae;g__Streptomyces;s__Streptomyces fagopyri	27	1	0.000648
100137571	SRR11450585|k141_341492_flag=1_multi=25.0000_len=6112	Pisuviricota	d__Bacteria;p__Actinobacteriota;c__Actinomycetia;o__Streptomycetales;f__Streptomycetaceae;g__Streptomyces;s__Streptomyces fagopyri	27	1	0.000648
100137571	SRR11649087|k141_26058_flag=1_multi=10.0000_len=4143	Unclassified	d__Bacteria;p__Actinobacteriota;c__Actinomycetia;o__Streptomycetales;f__Streptomycetaceae;g__Streptomyces;s__Streptomyces fagopyri	27	1	0.000648
100137571	SRR12685681|k141_37340_flag=1_multi=6.0000_len=1375	Kitrinoviricota	d__Bacteria;p__Actinobacteriota;c__Actinomycetia;o__Streptomycetales;f__Streptomycetaceae;g__Streptomyces;s__Streptomyces fagopyri	27	1	0.000648
100137572	SRR11829144|k141_21356_flag=1_multi=12.0000_len=4379	Unclassified	d__Bacteria;p__Actinobacteriota;c__Actinomycetia;o__Streptomycetales;f__Streptomycetaceae;g__Streptomyces;s__Streptomyces fagopyri	27	1	0.00038
100137572	SRR5829963|k141_684416_flag=1_multi=32.7821_len=3960	Unclassified	d__Bacteria;p__Actinobacteriota;c__Actinomycetia;o__Streptomycetales;f__Streptomycetaceae;g__Streptomyces;s__Streptomyces fagopyri	27	1	0.00038
100137572	SRR11678561|k141_549_flag=1_multi=16.0000_len=4400	Kitrinoviricota	d__Bacteria;p__Actinobacteriota;c__Actinomycetia;o__Streptomycetales;f__Streptomycetaceae;g__Streptomyces;s__Streptomyces fagopyri	27	1	0.00038
100137572	SRR5829904|k141_59302_flag=1_multi=4.0000_len=3072	Kitrinoviricota	d__Bacteria;p__Actinobacteriota;c__Actinomycetia;o__Streptomycetales;f__Streptomycetaceae;g__Streptomyces;s__Streptomyces fagopyri	27	1	0.00038
100137572	SRR12632507|k141_170124_flag=1_multi=18.0000_len=6182	Pisuviricota	d__Bacteria;p__Actinobacteriota;c__Actinomycetia;o__Streptomycetales;f__Streptomycetaceae;g__Streptomyces;s__Streptomyces fagopyri	27	1	0.00038
100137572	SRR7535021|k141_97098_flag=1_multi=21.0000_len=7304	Pisuviricota	d__Bacteria;p__Actinobacteriota;c__Actinomycetia;o__Streptomycetales;f__Streptomycetaceae;g__Streptomyces;s__Streptomyces fagopyri	27	1	0.00038
100137572	SRR7004714|k141_6247_flag=1_multi=9.0000_len=5004	Pisuviricota	d__Bacteria;p__Actinobacteriota;c__Actinomycetia;o__Streptomycetales;f__Streptomycetaceae;g__Streptomyces;s__Streptomyces fagopyri	27	1	0.00038
100137572	SRR11450585|k141_341492_flag=1_multi=25.0000_len=6112	Pisuviricota	d__Bacteria;p__Actinobacteriota;c__Actinomycetia;o__Streptomycetales;f__Streptomycetaceae;g__Streptomyces;s__Streptomyces fagopyri	27	1	0.00038
100137572	SRR11647985|k141_31767_flag=1_multi=10.0000_len=5731	Pisuviricota	d__Bacteria;p__Actinobacteriota;c__Actinomycetia;o__Streptomycetales;f__Streptomycetaceae;g__Streptomyces;s__Streptomyces fagopyri	31	2	0.000106
100137572	SRR18771337|k141_14492_flag=1_multi=63.0000_len=9195	Pisuviricota	d__Bacteria;p__Actinobacteriota;c__Actinomycetia;o__Streptomycetales;f__Streptomycetaceae;g__Streptomyces;s__Streptomyces fagopyri	28	1	0.000106
100137574	SRR11829144|k141_21356_flag=1_multi=12.0000_len=4379	Unclassified	d__Bacteria;p__Actinobacteriota;c__Actinomycetia;o__Streptomycetales;f__Streptomycetaceae;g__Streptomyces;s__Streptomyces fagopyri	27	1	0.00035
100137574	SRR18771337|k141_14492_flag=1_multi=63.0000_len=9195	Pisuviricota	d__Bacteria;p__Actinobacteriota;c__Actinomycetia;o__Streptomycetales;f__Streptomycetaceae;g__Streptomyces;s__Streptomyces fagopyri	28	1	9.72e-05
100137574	SRR7535021|k141_97098_flag=1_multi=21.0000_len=7304	Pisuviricota	d__Bacteria;p__Actinobacteriota;c__Actinomycetia;o__Streptomycetales;f__Streptomycetaceae;g__Streptomyces;s__Streptomyces fagopyri	27	1	0.00035
100137574	SRR5829904|k141_59302_flag=1_multi=4.0000_len=3072	Kitrinoviricota	d__Bacteria;p__Actinobacteriota;c__Actinomycetia;o__Streptomycetales;f__Streptomycetaceae;g__Streptomyces;s__Streptomyces fagopyri	27	1	0.00035
100137574	SRR11450585|k141_341492_flag=1_multi=25.0000_len=6112	Pisuviricota	d__Bacteria;p__Actinobacteriota;c__Actinomycetia;o__Streptomycetales;f__Streptomycetaceae;g__Streptomyces;s__Streptomyces fagopyri	27	1	0.00035
100137574	SRR7004714|k141_6247_flag=1_multi=9.0000_len=5004	Pisuviricota	d__Bacteria;p__Actinobacteriota;c__Actinomycetia;o__Streptomycetales;f__Streptomycetaceae;g__Streptomyces;s__Streptomyces fagopyri	27	1	0.00035
100137574	SRR11678561|k141_549_flag=1_multi=16.0000_len=4400	Kitrinoviricota	d__Bacteria;p__Actinobacteriota;c__Actinomycetia;o__Streptomycetales;f__Streptomycetaceae;g__Streptomyces;s__Streptomyces fagopyri	27	1	0.00035
100137574	SRR12632507|k141_170124_flag=1_multi=18.0000_len=6182	Pisuviricota	d__Bacteria;p__Actinobacteriota;c__Actinomycetia;o__Streptomycetales;f__Streptomycetaceae;g__Streptomyces;s__Streptomyces fagopyri	27	1	0.00035
100137574	SRR5829963|k141_684416_flag=1_multi=32.7821_len=3960	Unclassified	d__Bacteria;p__Actinobacteriota;c__Actinomycetia;o__Streptomycetales;f__Streptomycetaceae;g__Streptomyces;s__Streptomyces fagopyri	27	1	0.00035
100137574	SRR11647985|k141_31767_flag=1_multi=10.0000_len=5731	Pisuviricota	d__Bacteria;p__Actinobacteriota;c__Actinomycetia;o__Streptomycetales;f__Streptomycetaceae;g__Streptomyces;s__Streptomyces fagopyri	31	2	9.72e-05
100137576	SRR5829963|k141_684416_flag=1_multi=32.7821_len=3960	Unclassified	d__Bacteria;p__Actinobacteriota;c__Actinomycetia;o__Streptomycetales;f__Streptomycetaceae;g__Streptomyces;s__Streptomyces fagopyri	27	1	0.000319
100137576	SRR12632507|k141_170124_flag=1_multi=18.0000_len=6182	Pisuviricota	d__Bacteria;p__Actinobacteriota;c__Actinomycetia;o__Streptomycetales;f__Streptomycetaceae;g__Streptomyces;s__Streptomyces fagopyri	27	1	0.000319
100137576	SRR11829144|k141_21356_flag=1_multi=12.0000_len=4379	Unclassified	d__Bacteria;p__Actinobacteriota;c__Actinomycetia;o__Streptomycetales;f__Streptomycetaceae;g__Streptomyces;s__Streptomyces fagopyri	27	1	0.000319
100137576	SRR7004714|k141_6247_flag=1_multi=9.0000_len=5004	Pisuviricota	d__Bacteria;p__Actinobacteriota;c__Actinomycetia;o__Streptomycetales;f__Streptomycetaceae;g__Streptomyces;s__Streptomyces fagopyri	27	1	0.000319
100137576	SRR5829904|k141_59302_flag=1_multi=4.0000_len=3072	Kitrinoviricota	d__Bacteria;p__Actinobacteriota;c__Actinomycetia;o__Streptomycetales;f__Streptomycetaceae;g__Streptomyces;s__Streptomyces fagopyri	27	1	0.000319
100137576	SRR7535021|k141_97098_flag=1_multi=21.0000_len=7304	Pisuviricota	d__Bacteria;p__Actinobacteriota;c__Actinomycetia;o__Streptomycetales;f__Streptomycetaceae;g__Streptomyces;s__Streptomyces fagopyri	27	1	0.000319
100137576	SRR18771337|k141_14492_flag=1_multi=63.0000_len=9195	Pisuviricota	d__Bacteria;p__Actinobacteriota;c__Actinomycetia;o__Streptomycetales;f__Streptomycetaceae;g__Streptomyces;s__Streptomyces fagopyri	28	1	8.86e-05
100137576	SRR11450585|k141_341492_flag=1_multi=25.0000_len=6112	Pisuviricota	d__Bacteria;p__Actinobacteriota;c__Actinomycetia;o__Streptomycetales;f__Streptomycetaceae;g__Streptomyces;s__Streptomyces fagopyri	27	1	0.000319
100137576	SRR11647985|k141_31767_flag=1_multi=10.0000_len=5731	Pisuviricota	d__Bacteria;p__Actinobacteriota;c__Actinomycetia;o__Streptomycetales;f__Streptomycetaceae;g__Streptomyces;s__Streptomyces fagopyri	31	2	8.86e-05
100137576	SRR11678561|k141_549_flag=1_multi=16.0000_len=4400	Kitrinoviricota	d__Bacteria;p__Actinobacteriota;c__Actinomycetia;o__Streptomycetales;f__Streptomycetaceae;g__Streptomyces;s__Streptomyces fagopyri	27	1	0.000319
100157518	SRR11829144|k141_41746_flag=1_multi=10.0000_len=6681	Pisuviricota	d__Bacteria;p__Proteobacteria;c__Gammaproteobacteria;o__Enterobacterales;f__Enterobacteriaceae;g__Salmonella;s__Salmonella enterica	25	0	2.57e-05
100161190	SRR11828459|k141_18049_flag=1_multi=4.0000_len=1029	Duplornaviricota	d__Bacteria;p__Firmicutes_A;c__Clostridia;o__Peptostreptococcales;f__Peptostreptococcaceae;g__Clostridioides;s__Clostridioides difficile	29	1	1.11e-05
100161993	SRR11076227|k141_564324_flag=1_multi=26.0000_len=9102	Negarnaviricota	d__Bacteria;p__Firmicutes;c__Bacilli;o__Lactobacillales;f__Streptococcaceae;g__Streptococcus;s__Streptococcus agalactiae	27	1	9.26e-05
100162784	SRR11829261|k141_152797_flag=1_multi=151.2792_len=2526	Kitrinoviricota	d__Bacteria;p__Firmicutes_A;c__Clostridia;o__Peptostreptococcales;f__Peptostreptococcaceae;g__Clostridioides;s__Clostridioides difficile	25	0	4.29e-05
100163550	SRR11648413|k141_155839_flag=0_multi=32.5524_len=1714	Lenarviricota	d__Bacteria;p__Proteobacteria;c__Gammaproteobacteria;o__Enterobacterales;f__Enterobacteriaceae;g__Salmonella;s__Salmonella enterica	23	0	0.000333
100164272	SRR11829144|k141_41746_flag=1_multi=10.0000_len=6681	Pisuviricota	d__Bacteria;p__Proteobacteria;c__Gammaproteobacteria;o__Enterobacterales;f__Enterobacteriaceae;g__Salmonella;s__Salmonella enterica	25	0	2.57e-05
100178034	SRR11828459|k141_18049_flag=1_multi=4.0000_len=1029	Duplornaviricota	d__Bacteria;p__Firmicutes_A;c__Clostridia;o__Peptostreptococcales;f__Peptostreptococcaceae;g__Clostridioides;s__Clostridioides difficile	29	1	1.11e-05
100180245	SRR11829260|k141_73666_flag=0_multi=76.0000_len=11694	Pisuviricota	d__Bacteria;p__Firmicutes;c__Bacilli;o__Bacillales;f__Bacillaceae;g__Bacillus;s__Bacillus subtilis	28	1	5.43e-05
100187580	SRR7535304|k141_765696_flag=1_multi=6.0000_len=1555	Pisuviricota	d__Bacteria;p__Cyanobacteria;c__Cyanobacteriia;o__Pseudanabaenales;f__Pseudanabaenaceae;g__Pseudanabaena;s__	27	0	0.000666
100190221	SRR11828459|k141_18049_flag=1_multi=4.0000_len=1029	Duplornaviricota	d__Bacteria;p__Firmicutes_A;c__Clostridia;o__Peptostreptococcales;f__Peptostreptococcaceae;g__Clostridioides;s__Clostridioides difficile	29	1	1.11e-05
100194336	SRR11828459|k141_18049_flag=1_multi=4.0000_len=1029	Duplornaviricota	d__Bacteria;p__Firmicutes_A;c__Clostridia;o__Peptostreptococcales;f__Peptostreptococcaceae;g__Clostridioides;s__Clostridioides difficile	29	1	1.11e-05
100205525	SRR7535528|k141_90256_flag=1_multi=6.0000_len=2179	Kitrinoviricota	d__Bacteria;p__Firmicutes;c__Bacilli;o__Erysipelotrichales;f__Erysipelotrichaceae;g__Holdemanella;s__Holdemanella biformis	30	1	0.000777
100210931	SRR11076227|k141_564324_flag=1_multi=26.0000_len=9102	Negarnaviricota	d__Bacteria;p__Firmicutes;c__Bacilli;o__Lactobacillales;f__Streptococcaceae;g__Streptococcus;s__Streptococcus agalactiae	27	1	9.26e-05
100211469	SRR11829261|k141_152797_flag=1_multi=151.2792_len=2526	Kitrinoviricota	d__Bacteria;p__Firmicutes_A;c__Clostridia;o__Peptostreptococcales;f__Peptostreptococcaceae;g__Clostridioides;s__Clostridioides difficile	25	0	4.29e-05
100220192	SRR11450579|k141_104342_flag=1_multi=10.0000_len=4064	Pisuviricota	d__Bacteria;p__Firmicutes_A;c__Clostridia;o__Lachnospirales;f__Lachnospiraceae;g__14-2;s__14-2 sp910577785	27	1	0.000134
100222923	SRR11829261|k141_152797_flag=1_multi=151.2792_len=2526	Kitrinoviricota	d__Bacteria;p__Firmicutes_A;c__Clostridia;o__Peptostreptococcales;f__Peptostreptococcaceae;g__Clostridioides;s__Clostridioides difficile	25	0	4.29e-05
100222980	SRR11829261|k141_152797_flag=1_multi=151.2792_len=2526	Kitrinoviricota	d__Bacteria;p__Firmicutes_A;c__Clostridia;o__Peptostreptococcales;f__Peptostreptococcaceae;g__Clostridioides;s__Clostridioides difficile	25	0	4.29e-05
100223817	SRR17509977|k141_137261_flag=1_multi=15.0000_len=2450	Kitrinoviricota	d__Bacteria;p__Acidobacteriota;c__Holophagae;o__Holophagales;f__Holophagaceae;g__Geothrix;s__Geothrix sp016721195	34	1	9.28e-06
100223817	SRR17497049|k141_87067_flag=1_multi=464.0000_len=3624	Lenarviricota	d__Bacteria;p__Acidobacteriota;c__Holophagae;o__Holophagales;f__Holophagaceae;g__Geothrix;s__Geothrix sp016721195	24	0	0.000432
100223817	SRR17509978|k141_111246_flag=1_multi=25.3407_len=1855	Pisuviricota	d__Bacteria;p__Acidobacteriota;c__Holophagae;o__Holophagales;f__Holophagaceae;g__Geothrix;s__Geothrix sp016721195	33	0	4.29e-09
100223817	SRR17509979|k141_54497_flag=1_multi=434.0000_len=1853	Pisuviricota	d__Bacteria;p__Acidobacteriota;c__Holophagae;o__Holophagales;f__Holophagaceae;g__Geothrix;s__Geothrix sp016721195	33	0	4.29e-09
100223817	BC-0345298860|k141_3179	Lenarviricota	d__Bacteria;p__Acidobacteriota;c__Holophagae;o__Holophagales;f__Holophagaceae;g__Geothrix;s__Geothrix sp016721195	33	0	4.29e-09
100223817	SRR17497098|k141_13697_flag=1_multi=34.0000_len=1851	Pisuviricota	d__Bacteria;p__Acidobacteriota;c__Holophagae;o__Holophagales;f__Holophagaceae;g__Geothrix;s__Geothrix sp016721195	33	0	4.29e-09
100223817	SRR11450585|k141_260925_flag=1_multi=20.0000_len=6420	Unclassified	d__Bacteria;p__Acidobacteriota;c__Holophagae;o__Holophagales;f__Holophagaceae;g__Geothrix;s__Geothrix sp016721195	34	0	2e-07
100223817	SRR17497054|k141_191824_flag=1_multi=13.0000_len=2259	Pisuviricota	d__Bacteria;p__Acidobacteriota;c__Holophagae;o__Holophagales;f__Holophagaceae;g__Geothrix;s__Geothrix sp016721195	33	0	4.29e-09
100223817	SRR17497068|k141_144847_flag=1_multi=37.7881_len=1816	Pisuviricota	d__Bacteria;p__Acidobacteriota;c__Holophagae;o__Holophagales;f__Holophagaceae;g__Geothrix;s__Geothrix sp016721195	33	0	4.29e-09
100223817	SRR17497064|k141_135790_flag=1_multi=52.0000_len=1739	Pisuviricota	d__Bacteria;p__Acidobacteriota;c__Holophagae;o__Holophagales;f__Holophagaceae;g__Geothrix;s__Geothrix sp016721195	33	0	4.29e-09
100223817	SRR17509979|k141_53443_flag=1_multi=169.8080_len=4630	Kitrinoviricota	d__Bacteria;p__Acidobacteriota;c__Holophagae;o__Holophagales;f__Holophagaceae;g__Geothrix;s__Geothrix sp016721195	33	0	4.29e-09
100223817	SRR17481244|k141_92016_flag=1_multi=44.0000_len=3519	Lenarviricota	d__Bacteria;p__Acidobacteriota;c__Holophagae;o__Holophagales;f__Holophagaceae;g__Geothrix;s__Geothrix sp016721195	33	0	4.29e-09
100223817	SRR17481242|k141_14860_flag=1_multi=140.0000_len=3974	Unclassified	d__Bacteria;p__Acidobacteriota;c__Holophagae;o__Holophagales;f__Holophagaceae;g__Geothrix;s__Geothrix sp016721195	33	0	4.29e-09
100223817	SRR17509979|k141_52575_flag=1_multi=83.6741_len=1804	Pisuviricota	d__Bacteria;p__Acidobacteriota;c__Holophagae;o__Holophagales;f__Holophagaceae;g__Geothrix;s__Geothrix sp016721195	33	0	4.29e-09
100223817	SRR17509967|k141_44924_flag=1_multi=7.0000_len=2320	Pisuviricota	d__Bacteria;p__Acidobacteriota;c__Holophagae;o__Holophagales;f__Holophagaceae;g__Geothrix;s__Geothrix sp016721195	30	1	9.28e-06
100223817	SRR11829331|k141_332492_flag=1_multi=252.0000_len=4351	Lenarviricota	d__Bacteria;p__Acidobacteriota;c__Holophagae;o__Holophagales;f__Holophagaceae;g__Geothrix;s__Geothrix sp016721195	33	0	4.29e-09
100223817	SRR17509940|k141_117101_flag=1_multi=38.0000_len=2457	Duplornaviricota	d__Bacteria;p__Acidobacteriota;c__Holophagae;o__Holophagales;f__Holophagaceae;g__Geothrix;s__Geothrix sp016721195	26	0	3.34e-05
100223817	SRR17497126|k141_95757_flag=1_multi=826.0000_len=3116	Lenarviricota	d__Bacteria;p__Acidobacteriota;c__Holophagae;o__Holophagales;f__Holophagaceae;g__Geothrix;s__Geothrix sp016721195	34	0	2e-07
100223817	SRR18771403|k141_131354_flag=1_multi=48.8407_len=10690	Pisuviricota	d__Bacteria;p__Acidobacteriota;c__Holophagae;o__Holophagales;f__Holophagaceae;g__Geothrix;s__Geothrix sp016721195	33	0	4.29e-09
100223817	SRR10849374|k141_218357_flag=1_multi=12.0000_len=3750	Lenarviricota	d__Bacteria;p__Acidobacteriota;c__Holophagae;o__Holophagales;f__Holophagaceae;g__Geothrix;s__Geothrix sp016721195	33	0	4.29e-09
100223817	SRR11648176|k141_298601_flag=1_multi=36.0000_len=3120	Kitrinoviricota	d__Bacteria;p__Acidobacteriota;c__Holophagae;o__Holophagales;f__Holophagaceae;g__Geothrix;s__Geothrix sp016721195	33	0	4.29e-09
100223817	SRR17497092|k141_33398_flag=1_multi=217.0121_len=1878	Pisuviricota	d__Bacteria;p__Acidobacteriota;c__Holophagae;o__Holophagales;f__Holophagaceae;g__Geothrix;s__Geothrix sp016721195	33	0	4.29e-09
100223817	BC-0332570062|k141_61782	Lenarviricota	d__Bacteria;p__Acidobacteriota;c__Holophagae;o__Holophagales;f__Holophagaceae;g__Geothrix;s__Geothrix sp016721195	33	0	4.29e-09
100223817	SRR11828805|k141_11533_flag=1_multi=89.8329_len=3648	Kitrinoviricota	d__Bacteria;p__Acidobacteriota;c__Holophagae;o__Holophagales;f__Holophagaceae;g__Geothrix;s__Geothrix sp016721195	34	0	2e-07
100223817	SRR17509979|k141_28799_flag=1_multi=182.0000_len=1917	Pisuviricota	d__Bacteria;p__Acidobacteriota;c__Holophagae;o__Holophagales;f__Holophagaceae;g__Geothrix;s__Geothrix sp016721195	33	0	4.29e-09
100223817	SRR17509976|k141_100049_flag=1_multi=72.0000_len=1862	Pisuviricota	d__Bacteria;p__Acidobacteriota;c__Holophagae;o__Holophagales;f__Holophagaceae;g__Geothrix;s__Geothrix sp016721195	35	0	2.58e-06
100223817	SRR11450579|k141_22903_flag=1_multi=93.0000_len=8250	Pisuviricota	d__Bacteria;p__Acidobacteriota;c__Holophagae;o__Holophagales;f__Holophagaceae;g__Geothrix;s__Geothrix sp016721195	27	0	9.28e-06
100223817	SRR17497069|k141_154292_flag=1_multi=166.0000_len=1714	Pisuviricota	d__Bacteria;p__Acidobacteriota;c__Holophagae;o__Holophagales;f__Holophagaceae;g__Geothrix;s__Geothrix sp016721195	31	1	2.58e-06
100223817	SRR14530880|k119_2620_flag=1_multi=62.0000_len=4380	Kitrinoviricota	d__Bacteria;p__Acidobacteriota;c__Holophagae;o__Holophagales;f__Holophagaceae;g__Geothrix;s__Geothrix sp016721195	33	0	4.29e-09
100223817	SRR17509979|k141_62709_flag=1_multi=44.0000_len=2751	Pisuviricota	d__Bacteria;p__Acidobacteriota;c__Holophagae;o__Holophagales;f__Holophagaceae;g__Geothrix;s__Geothrix sp016721195	34	0	2e-07
100223817	SRR17497126|k141_68629_flag=1_multi=6.0000_len=1048	Pisuviricota	d__Bacteria;p__Acidobacteriota;c__Holophagae;o__Holophagales;f__Holophagaceae;g__Geothrix;s__Geothrix sp016721195	24	0	0.000432
100223817	SRR18770931|k141_53716_flag=1_multi=6.0000_len=1000	Lenarviricota	d__Bacteria;p__Acidobacteriota;c__Holophagae;o__Holophagales;f__Holophagaceae;g__Geothrix;s__Geothrix sp016721195	35	0	2.58e-06
100223817	SRR11565437|k141_190787_flag=1_multi=8.0000_len=2964	Kitrinoviricota	d__Bacteria;p__Acidobacteriota;c__Holophagae;o__Holophagales;f__Holophagaceae;g__Geothrix;s__Geothrix sp016721195	29	0	0.00012
100223817	SRR17497064|k141_128537_flag=1_multi=9.0000_len=1004	Pisuviricota	d__Bacteria;p__Acidobacteriota;c__Holophagae;o__Holophagales;f__Holophagaceae;g__Geothrix;s__Geothrix sp016721195	31	1	2.58e-06
100223817	SRR11648360|k141_236875_flag=1_multi=13.0000_len=4864	urv.p.001	d__Bacteria;p__Acidobacteriota;c__Holophagae;o__Holophagales;f__Holophagaceae;g__Geothrix;s__Geothrix sp016721195	28	0	2.58e-06
100223817	SRR17509977|k141_51278_flag=1_multi=666.0000_len=6190	Pisuviricota	d__Bacteria;p__Acidobacteriota;c__Holophagae;o__Holophagales;f__Holophagaceae;g__Geothrix;s__Geothrix sp016721195	34	0	2e-07
100223817	SRR5829964|k141_20917_flag=1_multi=123.0000_len=1791	Kitrinoviricota	d__Bacteria;p__Acidobacteriota;c__Holophagae;o__Holophagales;f__Holophagaceae;g__Geothrix;s__Geothrix sp016721195	31	2	0.00012
100223817	SRR10849744|k141_310535_flag=1_multi=101.0000_len=3955	Lenarviricota	d__Bacteria;p__Acidobacteriota;c__Holophagae;o__Holophagales;f__Holophagaceae;g__Geothrix;s__Geothrix sp016721195	34	0	1.19e-09
100223817	SRR17509977|k141_156580_flag=1_multi=3.0000_len=1406	Pisuviricota	d__Bacteria;p__Acidobacteriota;c__Holophagae;o__Holophagales;f__Holophagaceae;g__Geothrix;s__Geothrix sp016721195	32	1	7.18e-07
100223817	SRR17509979|k141_40329_flag=1_multi=17.0000_len=1013	Pisuviricota	d__Bacteria;p__Acidobacteriota;c__Holophagae;o__Holophagales;f__Holophagaceae;g__Geothrix;s__Geothrix sp016721195	29	1	3.34e-05
100223817	SRR17509976|k141_164083_flag=1_multi=58.0000_len=4337	Pisuviricota	d__Bacteria;p__Acidobacteriota;c__Holophagae;o__Holophagales;f__Holophagaceae;g__Geothrix;s__Geothrix sp016721195	34	1	9.28e-06
100223817	SRR17481244|k141_53629_flag=1_multi=27.0000_len=3662	Lenarviricota	d__Bacteria;p__Acidobacteriota;c__Holophagae;o__Holophagales;f__Holophagaceae;g__Geothrix;s__Geothrix sp016721195	35	0	2.58e-06
100223817	SRR17509978|k141_113185_flag=1_multi=9.0000_len=1199	Pisuviricota	d__Bacteria;p__Acidobacteriota;c__Holophagae;o__Holophagales;f__Holophagaceae;g__Geothrix;s__Geothrix sp016721195	33	2	9.28e-06
100223818	SRR11648176|k141_298601_flag=1_multi=36.0000_len=3120	Kitrinoviricota	d__Bacteria;p__Acidobacteriota;c__Holophagae;o__Holophagales;f__Holophagaceae;g__Geothrix;s__Geothrix sp016721195	31	0	5.02e-08
100223818	SRR17497049|k141_87067_flag=1_multi=464.0000_len=3624	Lenarviricota	d__Bacteria;p__Acidobacteriota;c__Holophagae;o__Holophagales;f__Holophagaceae;g__Geothrix;s__Geothrix sp016721195	24	0	0.000391
100223818	SRR17481242|k141_14860_flag=1_multi=140.0000_len=3974	Unclassified	d__Bacteria;p__Acidobacteriota;c__Holophagae;o__Holophagales;f__Holophagaceae;g__Geothrix;s__Geothrix sp016721195	31	0	5.02e-08
100223818	SRR17497068|k141_144847_flag=1_multi=37.7881_len=1816	Pisuviricota	d__Bacteria;p__Acidobacteriota;c__Holophagae;o__Holophagales;f__Holophagaceae;g__Geothrix;s__Geothrix sp016721195	31	0	5.02e-08
100223818	SRR17497064|k141_135790_flag=1_multi=52.0000_len=1739	Pisuviricota	d__Bacteria;p__Acidobacteriota;c__Holophagae;o__Holophagales;f__Holophagaceae;g__Geothrix;s__Geothrix sp016721195	31	0	5.02e-08
100223818	SRR17509978|k141_111246_flag=1_multi=25.3407_len=1855	Pisuviricota	d__Bacteria;p__Acidobacteriota;c__Holophagae;o__Holophagales;f__Holophagaceae;g__Geothrix;s__Geothrix sp016721195	31	0	5.02e-08
100223818	BC-0345298860|k141_3179	Lenarviricota	d__Bacteria;p__Acidobacteriota;c__Holophagae;o__Holophagales;f__Holophagaceae;g__Geothrix;s__Geothrix sp016721195	31	0	5.02e-08
100223818	SRR11829331|k141_332492_flag=1_multi=252.0000_len=4351	Lenarviricota	d__Bacteria;p__Acidobacteriota;c__Holophagae;o__Holophagales;f__Holophagaceae;g__Geothrix;s__Geothrix sp016721195	31	0	5.02e-08
100223818	SRR17497054|k141_191824_flag=1_multi=13.0000_len=2259	Pisuviricota	d__Bacteria;p__Acidobacteriota;c__Holophagae;o__Holophagales;f__Holophagaceae;g__Geothrix;s__Geothrix sp016721195	31	0	5.02e-08
100223818	SRR11828805|k141_11533_flag=1_multi=89.8329_len=3648	Kitrinoviricota	d__Bacteria;p__Acidobacteriota;c__Holophagae;o__Holophagales;f__Holophagaceae;g__Geothrix;s__Geothrix sp016721195	32	0	2.34e-06
100223818	SRR11565437|k141_190787_flag=1_multi=8.0000_len=2964	Kitrinoviricota	d__Bacteria;p__Acidobacteriota;c__Holophagae;o__Holophagales;f__Holophagaceae;g__Geothrix;s__Geothrix sp016721195	28	1	0.000109
100223818	SRR17509979|k141_28799_flag=1_multi=182.0000_len=1917	Pisuviricota	d__Bacteria;p__Acidobacteriota;c__Holophagae;o__Holophagales;f__Holophagaceae;g__Geothrix;s__Geothrix sp016721195	31	0	5.02e-08
100223818	SRR17509940|k141_117101_flag=1_multi=38.0000_len=2457	Duplornaviricota	d__Bacteria;p__Acidobacteriota;c__Holophagae;o__Holophagales;f__Holophagaceae;g__Geothrix;s__Geothrix sp016721195	26	0	3.02e-05
100223818	SRR17497092|k141_33398_flag=1_multi=217.0121_len=1878	Pisuviricota	d__Bacteria;p__Acidobacteriota;c__Holophagae;o__Holophagales;f__Holophagaceae;g__Geothrix;s__Geothrix sp016721195	31	0	5.02e-08
100223818	SRR11450585|k141_260925_flag=1_multi=20.0000_len=6420	Unclassified	d__Bacteria;p__Acidobacteriota;c__Holophagae;o__Holophagales;f__Holophagaceae;g__Geothrix;s__Geothrix sp016721195	32	0	2.34e-06
100223818	SRR17509979|k141_52575_flag=1_multi=83.6741_len=1804	Pisuviricota	d__Bacteria;p__Acidobacteriota;c__Holophagae;o__Holophagales;f__Holophagaceae;g__Geothrix;s__Geothrix sp016721195	31	0	5.02e-08
100223818	SRR17509979|k141_53443_flag=1_multi=169.8080_len=4630	Kitrinoviricota	d__Bacteria;p__Acidobacteriota;c__Holophagae;o__Holophagales;f__Holophagaceae;g__Geothrix;s__Geothrix sp016721195	31	0	5.02e-08
100223818	SRR14530880|k119_2620_flag=1_multi=62.0000_len=4380	Kitrinoviricota	d__Bacteria;p__Acidobacteriota;c__Holophagae;o__Holophagales;f__Holophagaceae;g__Geothrix;s__Geothrix sp016721195	31	0	5.02e-08
100223818	SRR17509979|k141_54497_flag=1_multi=434.0000_len=1853	Pisuviricota	d__Bacteria;p__Acidobacteriota;c__Holophagae;o__Holophagales;f__Holophagaceae;g__Geothrix;s__Geothrix sp016721195	31	0	5.02e-08
100223818	SRR10849374|k141_218357_flag=1_multi=12.0000_len=3750	Lenarviricota	d__Bacteria;p__Acidobacteriota;c__Holophagae;o__Holophagales;f__Holophagaceae;g__Geothrix;s__Geothrix sp016721195	31	0	5.02e-08
100223818	SRR17481244|k141_92016_flag=1_multi=44.0000_len=3519	Lenarviricota	d__Bacteria;p__Acidobacteriota;c__Holophagae;o__Holophagales;f__Holophagaceae;g__Geothrix;s__Geothrix sp016721195	31	0	5.02e-08
100223818	SRR17509977|k141_137261_flag=1_multi=15.0000_len=2450	Kitrinoviricota	d__Bacteria;p__Acidobacteriota;c__Holophagae;o__Holophagales;f__Holophagaceae;g__Geothrix;s__Geothrix sp016721195	33	0	3.02e-05
100223818	SRR17509979|k141_11840_flag=1_multi=73.0000_len=1384	Pisuviricota	d__Bacteria;p__Acidobacteriota;c__Holophagae;o__Holophagales;f__Holophagaceae;g__Geothrix;s__Geothrix sp016721195	32	1	0.000109
100223818	SRR10849744|k141_310535_flag=1_multi=101.0000_len=3955	Lenarviricota	d__Bacteria;p__Acidobacteriota;c__Holophagae;o__Holophagales;f__Holophagaceae;g__Geothrix;s__Geothrix sp016721195	32	0	1.4e-08
100223818	SRR18771403|k141_131354_flag=1_multi=48.8407_len=10690	Pisuviricota	d__Bacteria;p__Acidobacteriota;c__Holophagae;o__Holophagales;f__Holophagaceae;g__Geothrix;s__Geothrix sp016721195	31	0	5.02e-08
100223818	SRR17497126|k141_95757_flag=1_multi=826.0000_len=3116	Lenarviricota	d__Bacteria;p__Acidobacteriota;c__Holophagae;o__Holophagales;f__Holophagaceae;g__Geothrix;s__Geothrix sp016721195	32	0	2.34e-06
100223818	SRR17509977|k141_51278_flag=1_multi=666.0000_len=6190	Pisuviricota	d__Bacteria;p__Acidobacteriota;c__Holophagae;o__Holophagales;f__Holophagaceae;g__Geothrix;s__Geothrix sp016721195	30	0	1.81e-07
100223818	SRR17509979|k141_62709_flag=1_multi=44.0000_len=2751	Pisuviricota	d__Bacteria;p__Acidobacteriota;c__Holophagae;o__Holophagales;f__Holophagaceae;g__Geothrix;s__Geothrix sp016721195	32	0	2.34e-06
100223818	SRR18770931|k141_53716_flag=1_multi=6.0000_len=1000	Lenarviricota	d__Bacteria;p__Acidobacteriota;c__Holophagae;o__Holophagales;f__Holophagaceae;g__Geothrix;s__Geothrix sp016721195	33	0	3.02e-05
100223818	SRR17509976|k141_164083_flag=1_multi=58.0000_len=4337	Pisuviricota	d__Bacteria;p__Acidobacteriota;c__Holophagae;o__Holophagales;f__Holophagaceae;g__Geothrix;s__Geothrix sp016721195	27	0	8.4e-06
100223818	SRR17497098|k141_13697_flag=1_multi=34.0000_len=1851	Pisuviricota	d__Bacteria;p__Acidobacteriota;c__Holophagae;o__Holophagales;f__Holophagaceae;g__Geothrix;s__Geothrix sp016721195	31	0	5.02e-08
100223818	BC-0332570062|k141_61782	Lenarviricota	d__Bacteria;p__Acidobacteriota;c__Holophagae;o__Holophagales;f__Holophagaceae;g__Geothrix;s__Geothrix sp016721195	31	0	5.02e-08
100223818	SRR17497126|k141_68629_flag=1_multi=6.0000_len=1048	Pisuviricota	d__Bacteria;p__Acidobacteriota;c__Holophagae;o__Holophagales;f__Holophagaceae;g__Geothrix;s__Geothrix sp016721195	24	0	0.000391
100223818	SRR11648360|k141_236875_flag=1_multi=13.0000_len=4864	urv.p.001	d__Bacteria;p__Acidobacteriota;c__Holophagae;o__Holophagales;f__Holophagaceae;g__Geothrix;s__Geothrix sp016721195	28	0	2.34e-06
100223818	SRR11450579|k141_22903_flag=1_multi=93.0000_len=8250	Pisuviricota	d__Bacteria;p__Acidobacteriota;c__Holophagae;o__Holophagales;f__Holophagaceae;g__Geothrix;s__Geothrix sp016721195	27	0	8.4e-06
100223818	SRR17509979|k141_40329_flag=1_multi=17.0000_len=1013	Pisuviricota	d__Bacteria;p__Acidobacteriota;c__Holophagae;o__Holophagales;f__Holophagaceae;g__Geothrix;s__Geothrix sp016721195	29	1	3.02e-05
100223818	SRR17509977|k141_156580_flag=1_multi=3.0000_len=1406	Pisuviricota	d__Bacteria;p__Acidobacteriota;c__Holophagae;o__Holophagales;f__Holophagaceae;g__Geothrix;s__Geothrix sp016721195	32	0	2.34e-06
100223818	SRR17509978|k141_113185_flag=1_multi=9.0000_len=1199	Pisuviricota	d__Bacteria;p__Acidobacteriota;c__Holophagae;o__Holophagales;f__Holophagaceae;g__Geothrix;s__Geothrix sp016721195	33	0	3.02e-05
100223818	SRR17497069|k141_154292_flag=1_multi=166.0000_len=1714	Pisuviricota	d__Bacteria;p__Acidobacteriota;c__Holophagae;o__Holophagales;f__Holophagaceae;g__Geothrix;s__Geothrix sp016721195	31	1	2.34e-06
100223818	SRR17497064|k141_128537_flag=1_multi=9.0000_len=1004	Pisuviricota	d__Bacteria;p__Acidobacteriota;c__Holophagae;o__Holophagales;f__Holophagaceae;g__Geothrix;s__Geothrix sp016721195	31	1	2.34e-06
100223818	SRR5829964|k141_20917_flag=1_multi=123.0000_len=1791	Kitrinoviricota	d__Bacteria;p__Acidobacteriota;c__Holophagae;o__Holophagales;f__Holophagaceae;g__Geothrix;s__Geothrix sp016721195	31	1	0.000391
100223818	SRR17509967|k141_44924_flag=1_multi=7.0000_len=2320	Pisuviricota	d__Bacteria;p__Acidobacteriota;c__Holophagae;o__Holophagales;f__Holophagaceae;g__Geothrix;s__Geothrix sp016721195	30	1	8.4e-06
100223820	SRR10849744|k141_310535_flag=1_multi=101.0000_len=3955	Lenarviricota	d__Bacteria;p__Acidobacteriota;c__Holophagae;o__Holophagales;f__Holophagaceae;g__Geothrix;s__Geothrix sp016721195	29	2	0.000333
100223822	SRR17497099|k141_59590_flag=1_multi=17.5683_len=1158	Pisuviricota	d__Bacteria;p__Acidobacteriota;c__Holophagae;o__Holophagales;f__Holophagaceae;g__Geothrix;s__Geothrix sp016721195	29	0	0.000666
100226025	SRR11829261|k141_152797_flag=1_multi=151.2792_len=2526	Kitrinoviricota	d__Bacteria;p__Firmicutes_A;c__Clostridia;o__Peptostreptococcales;f__Peptostreptococcaceae;g__Clostridioides;s__Clostridioides difficile	25	0	4.29e-05
100230179	SRR11827439|k141_109350_flag=1_multi=4.0000_len=2497	Duplornaviricota	d__Bacteria;p__Firmicutes_A;c__Clostridia;o__Peptostreptococcales;f__Peptostreptococcaceae;g__Clostridioides;s__Clostridioides difficile	26	1	0.000518
100241063	SRR11829261|k141_152797_flag=1_multi=151.2792_len=2526	Kitrinoviricota	d__Bacteria;p__Firmicutes_A;c__Clostridia;o__Peptostreptococcales;f__Peptostreptococcaceae;g__Clostridioides;s__Clostridioides difficile	25	0	4.29e-05
100241088	SRR11648413|k141_155839_flag=0_multi=32.5524_len=1714	Lenarviricota	d__Bacteria;p__Proteobacteria;c__Gammaproteobacteria;o__Enterobacterales;f__Enterobacteriaceae;g__Salmonella;s__Salmonella enterica	23	0	0.000333
100243108	SRR11648413|k141_155839_flag=0_multi=32.5524_len=1714	Lenarviricota	d__Bacteria;p__Proteobacteria;c__Gammaproteobacteria;o__Enterobacterales;f__Enterobacteriaceae;g__Salmonella;s__Salmonella enterica	23	0	0.000333
100244310	SRR11827439|k141_109350_flag=1_multi=4.0000_len=2497	Duplornaviricota	d__Bacteria;p__Firmicutes_A;c__Clostridia;o__Peptostreptococcales;f__Peptostreptococcaceae;g__Clostridioides;s__Clostridioides difficile	26	1	0.000518
100247510	SRR11829261|k141_152797_flag=1_multi=151.2792_len=2526	Kitrinoviricota	d__Bacteria;p__Firmicutes_A;c__Clostridia;o__Peptostreptococcales;f__Peptostreptococcaceae;g__Clostridioides;s__Clostridioides difficile	25	0	4.29e-05
100255977	SRR11648413|k141_155839_flag=0_multi=32.5524_len=1714	Lenarviricota	d__Bacteria;p__Proteobacteria;c__Gammaproteobacteria;o__Enterobacterales;f__Enterobacteriaceae;g__Salmonella;s__Salmonella enterica	23	0	0.000333
100261098	SRR11829261|k141_152797_flag=1_multi=151.2792_len=2526	Kitrinoviricota	d__Bacteria;p__Firmicutes_A;c__Clostridia;o__Peptostreptococcales;f__Peptostreptococcaceae;g__Clostridioides;s__Clostridioides difficile	25	0	4.29e-05
100262763	SRR11450579|k141_236588_flag=1_multi=105.0000_len=8198	Pisuviricota	d__Bacteria;p__Proteobacteria;c__Gammaproteobacteria;o__Enterobacterales;f__Enterobacteriaceae;g__Klebsiella;s__Klebsiella pneumoniae	23	0	0.00037
100262763	BC-0345794107|k141_11800	Pisuviricota	d__Bacteria;p__Proteobacteria;c__Gammaproteobacteria;o__Enterobacterales;f__Enterobacteriaceae;g__Klebsiella;s__Klebsiella pneumoniae	23	0	0.00037
100262763	BC-0302413540|k141_158	Kitrinoviricota	d__Bacteria;p__Proteobacteria;c__Gammaproteobacteria;o__Enterobacterales;f__Enterobacteriaceae;g__Klebsiella;s__Klebsiella pneumoniae	23	0	0.00037
100262763	BC-0345724490|k141_9515	Duplornaviricota	d__Bacteria;p__Proteobacteria;c__Gammaproteobacteria;o__Enterobacterales;f__Enterobacteriaceae;g__Klebsiella;s__Klebsiella pneumoniae	24	0	0.000103
100262763	SRR11450579|k141_17049_flag=1_multi=4764.0000_len=8934	Pisuviricota	d__Bacteria;p__Proteobacteria;c__Gammaproteobacteria;o__Enterobacterales;f__Enterobacteriaceae;g__Klebsiella;s__Klebsiella pneumoniae	23	0	0.00037
100262763	SRR12686088|k141_14412_flag=1_multi=15.0000_len=5750	Pisuviricota	d__Bacteria;p__Proteobacteria;c__Gammaproteobacteria;o__Enterobacterales;f__Enterobacteriaceae;g__Klebsiella;s__Klebsiella pneumoniae	24	0	0.000103
100262763	SRR11450577|k141_1033_flag=1_multi=59.9742_len=2428	Pisuviricota	d__Bacteria;p__Proteobacteria;c__Gammaproteobacteria;o__Enterobacterales;f__Enterobacteriaceae;g__Klebsiella;s__Klebsiella pneumoniae	23	0	0.00037
100262763	SRR18770918|k141_15596_flag=1_multi=75.0000_len=10756	Kitrinoviricota	d__Bacteria;p__Proteobacteria;c__Gammaproteobacteria;o__Enterobacterales;f__Enterobacteriaceae;g__Klebsiella;s__Klebsiella pneumoniae	23	0	0.00037
100262763	SRR11648202|k141_322_flag=0_multi=521.7310_len=1955	Pisuviricota	d__Bacteria;p__Proteobacteria;c__Gammaproteobacteria;o__Enterobacterales;f__Enterobacteriaceae;g__Klebsiella;s__Klebsiella pneumoniae	23	0	0.00037
100262763	SRR11649087|k141_77109_flag=1_multi=287.0000_len=9144	Pisuviricota	d__Bacteria;p__Proteobacteria;c__Gammaproteobacteria;o__Enterobacterales;f__Enterobacteriaceae;g__Klebsiella;s__Klebsiella pneumoniae	23	0	0.00037
100262763	SRR5829926|k141_223325_flag=1_multi=36.0000_len=9335	Pisuviricota	d__Bacteria;p__Proteobacteria;c__Gammaproteobacteria;o__Enterobacterales;f__Enterobacteriaceae;g__Klebsiella;s__Klebsiella pneumoniae	24	0	0.000103
100262763	SRR11648176|k141_60865_flag=1_multi=117.8157_len=8095	Pisuviricota	d__Bacteria;p__Proteobacteria;c__Gammaproteobacteria;o__Enterobacterales;f__Enterobacteriaceae;g__Klebsiella;s__Klebsiella pneumoniae	23	0	0.00037
100262763	SRR11648360|k141_187449_flag=1_multi=2812.0000_len=9848	Pisuviricota	d__Bacteria;p__Proteobacteria;c__Gammaproteobacteria;o__Enterobacterales;f__Enterobacteriaceae;g__Klebsiella;s__Klebsiella pneumoniae	23	0	0.00037
100262763	SRR17481244|k141_434_flag=1_multi=161.0000_len=2746	Kitrinoviricota	d__Bacteria;p__Proteobacteria;c__Gammaproteobacteria;o__Enterobacterales;f__Enterobacteriaceae;g__Klebsiella;s__Klebsiella pneumoniae	26	0	7.95e-06
100262763	BC-0345318742|k141_63184	Pisuviricota	d__Bacteria;p__Proteobacteria;c__Gammaproteobacteria;o__Enterobacterales;f__Enterobacteriaceae;g__Klebsiella;s__Klebsiella pneumoniae	23	0	0.00037
100262763	SRR11648360|k141_2427_flag=0_multi=550.5579_len=8547	Pisuviricota	d__Bacteria;p__Proteobacteria;c__Gammaproteobacteria;o__Enterobacterales;f__Enterobacteriaceae;g__Klebsiella;s__Klebsiella pneumoniae	23	0	0.00037
100262763	BC-0345649514|k141_807	Pisuviricota	d__Bacteria;p__Proteobacteria;c__Gammaproteobacteria;o__Enterobacterales;f__Enterobacteriaceae;g__Klebsiella;s__Klebsiella pneumoniae	23	0	0.00037
100262763	SRR11450580|k141_109913_flag=1_multi=102.0000_len=6558	Pisuviricota	d__Bacteria;p__Proteobacteria;c__Gammaproteobacteria;o__Enterobacterales;f__Enterobacteriaceae;g__Klebsiella;s__Klebsiella pneumoniae	23	0	0.00037
100262763	SRR11450586|k141_213458_flag=1_multi=6442.8094_len=10045	Pisuviricota	d__Bacteria;p__Proteobacteria;c__Gammaproteobacteria;o__Enterobacterales;f__Enterobacteriaceae;g__Klebsiella;s__Klebsiella pneumoniae	23	0	0.00037
100262763	BC-0302417267|k141_472	Kitrinoviricota	d__Bacteria;p__Proteobacteria;c__Gammaproteobacteria;o__Enterobacterales;f__Enterobacteriaceae;g__Klebsiella;s__Klebsiella pneumoniae	23	0	0.00037
100262763	SRR11563379|k141_984_flag=1_multi=10.0000_len=5356	Pisuviricota	d__Bacteria;p__Proteobacteria;c__Gammaproteobacteria;o__Enterobacterales;f__Enterobacteriaceae;g__Klebsiella;s__Klebsiella pneumoniae	23	0	0.00037
100262763	SRR11828900|k141_55027_flag=1_multi=15.0000_len=8550	Pisuviricota	d__Bacteria;p__Proteobacteria;c__Gammaproteobacteria;o__Enterobacterales;f__Enterobacteriaceae;g__Klebsiella;s__Klebsiella pneumoniae	24	0	0.000103
100262763	SRR11648360|k141_238775_flag=1_multi=340.0000_len=9219	Pisuviricota	d__Bacteria;p__Proteobacteria;c__Gammaproteobacteria;o__Enterobacterales;f__Enterobacteriaceae;g__Klebsiella;s__Klebsiella pneumoniae	23	0	0.00037
100262763	SRR10849374|k141_328568_flag=1_multi=20.0000_len=3015	Lenarviricota	d__Bacteria;p__Proteobacteria;c__Gammaproteobacteria;o__Enterobacterales;f__Enterobacteriaceae;g__Klebsiella;s__Klebsiella pneumoniae	23	0	0.00037
100262763	SRR11829143|k141_119731_flag=1_multi=545.5096_len=9090	Pisuviricota	d__Bacteria;p__Proteobacteria;c__Gammaproteobacteria;o__Enterobacterales;f__Enterobacteriaceae;g__Klebsiella;s__Klebsiella pneumoniae	23	0	0.00037
100262763	SRR11450578|k141_2066_flag=1_multi=317.0000_len=8175	Pisuviricota	d__Bacteria;p__Proteobacteria;c__Gammaproteobacteria;o__Enterobacterales;f__Enterobacteriaceae;g__Klebsiella;s__Klebsiella pneumoniae	23	0	0.00037
100262763	SRR18771403|k141_22621_flag=1_multi=91.4202_len=8303	Pisuviricota	d__Bacteria;p__Proteobacteria;c__Gammaproteobacteria;o__Enterobacterales;f__Enterobacteriaceae;g__Klebsiella;s__Klebsiella pneumoniae	26	0	7.95e-06
100262763	BC-0345318769|k141_41055	Pisuviricota	d__Bacteria;p__Proteobacteria;c__Gammaproteobacteria;o__Enterobacterales;f__Enterobacteriaceae;g__Klebsiella;s__Klebsiella pneumoniae	23	0	0.00037
100262763	SRR11450579|k141_3421_flag=1_multi=110.0000_len=8612	Pisuviricota	d__Bacteria;p__Proteobacteria;c__Gammaproteobacteria;o__Enterobacterales;f__Enterobacteriaceae;g__Klebsiella;s__Klebsiella pneumoniae	23	0	0.00037
100262763	SRR11450579|k141_76622_flag=1_multi=211.0000_len=8995	Pisuviricota	d__Bacteria;p__Proteobacteria;c__Gammaproteobacteria;o__Enterobacterales;f__Enterobacteriaceae;g__Klebsiella;s__Klebsiella pneumoniae	23	0	0.00037
100262763	SRR11649087|k141_263042_flag=1_multi=27.0000_len=4125	Kitrinoviricota	d__Bacteria;p__Proteobacteria;c__Gammaproteobacteria;o__Enterobacterales;f__Enterobacteriaceae;g__Klebsiella;s__Klebsiella pneumoniae	23	0	0.00037
100262763	SRR10904365|k141_287437_flag=1_multi=32.0000_len=4454	Kitrinoviricota	d__Bacteria;p__Proteobacteria;c__Gammaproteobacteria;o__Enterobacterales;f__Enterobacteriaceae;g__Klebsiella;s__Klebsiella pneumoniae	24	0	0.000103
100262763	SRR11649087|k141_2929_flag=1_multi=251.0000_len=9689	Pisuviricota	d__Bacteria;p__Proteobacteria;c__Gammaproteobacteria;o__Enterobacterales;f__Enterobacteriaceae;g__Klebsiella;s__Klebsiella pneumoniae	23	0	0.00037
100262763	BC-0345698157|k141_28560	Pisuviricota	d__Bacteria;p__Proteobacteria;c__Gammaproteobacteria;o__Enterobacterales;f__Enterobacteriaceae;g__Klebsiella;s__Klebsiella pneumoniae	24	0	0.000103
100262763	SRR18771403|k141_131354_flag=1_multi=48.8407_len=10690	Pisuviricota	d__Bacteria;p__Proteobacteria;c__Gammaproteobacteria;o__Enterobacterales;f__Enterobacteriaceae;g__Klebsiella;s__Klebsiella pneumoniae	33	3	0.000103
100262763	SRR11450580|k141_1194_flag=1_multi=129.0000_len=9098	Pisuviricota	d__Bacteria;p__Proteobacteria;c__Gammaproteobacteria;o__Enterobacterales;f__Enterobacteriaceae;g__Klebsiella;s__Klebsiella pneumoniae	23	0	0.00037
100262763	SRR18771403|k141_2176_flag=1_multi=18.0000_len=4094	Pisuviricota	d__Bacteria;p__Proteobacteria;c__Gammaproteobacteria;o__Enterobacterales;f__Enterobacteriaceae;g__Klebsiella;s__Klebsiella pneumoniae	23	0	0.00037
100262763	SRR12685203|k141_1072_flag=1_multi=19.0000_len=4241	Kitrinoviricota	d__Bacteria;p__Proteobacteria;c__Gammaproteobacteria;o__Enterobacterales;f__Enterobacteriaceae;g__Klebsiella;s__Klebsiella pneumoniae	23	0	0.00037
100262763	SRR11829260|k141_2197_flag=1_multi=57.0000_len=4196	Kitrinoviricota	d__Bacteria;p__Proteobacteria;c__Gammaproteobacteria;o__Enterobacterales;f__Enterobacteriaceae;g__Klebsiella;s__Klebsiella pneumoniae	25	0	2.86e-05
100262763	BC-0332571705|k141_1013	Kitrinoviricota	d__Bacteria;p__Proteobacteria;c__Gammaproteobacteria;o__Enterobacterales;f__Enterobacteriaceae;g__Klebsiella;s__Klebsiella pneumoniae	23	0	0.00037
100262763	BC-0345732070|k141_514	Pisuviricota	d__Bacteria;p__Proteobacteria;c__Gammaproteobacteria;o__Enterobacterales;f__Enterobacteriaceae;g__Klebsiella;s__Klebsiella pneumoniae	23	0	0.00037
100262763	SRR18771337|k141_6955_flag=1_multi=101.0000_len=2265	Pisuviricota	d__Bacteria;p__Proteobacteria;c__Gammaproteobacteria;o__Enterobacterales;f__Enterobacteriaceae;g__Klebsiella;s__Klebsiella pneumoniae	23	0	0.00037
100262763	SRR18771403|k141_12334_flag=1_multi=224.0000_len=9334	Pisuviricota	d__Bacteria;p__Proteobacteria;c__Gammaproteobacteria;o__Enterobacterales;f__Enterobacteriaceae;g__Klebsiella;s__Klebsiella pneumoniae	24	0	0.000103
100262763	SRR17497063|k141_241810_flag=1_multi=46.0000_len=2686	Pisuviricota	d__Bacteria;p__Proteobacteria;c__Gammaproteobacteria;o__Enterobacterales;f__Enterobacteriaceae;g__Klebsiella;s__Klebsiella pneumoniae	24	0	0.000103
100262763	SRR18770940|k141_131164_flag=1_multi=223.0000_len=8177	Pisuviricota	d__Bacteria;p__Proteobacteria;c__Gammaproteobacteria;o__Enterobacterales;f__Enterobacteriaceae;g__Klebsiella;s__Klebsiella pneumoniae	24	0	0.000103
100262763	SRR11450580|k141_288389_flag=1_multi=108.0000_len=9065	Pisuviricota	d__Bacteria;p__Proteobacteria;c__Gammaproteobacteria;o__Enterobacterales;f__Enterobacteriaceae;g__Klebsiella;s__Klebsiella pneumoniae	24	0	0.000103
100262763	BC-0345318789|k141_1934	Pisuviricota	d__Bacteria;p__Proteobacteria;c__Gammaproteobacteria;o__Enterobacterales;f__Enterobacteriaceae;g__Klebsiella;s__Klebsiella pneumoniae	23	0	0.00037
100262763	SRR11829144|k141_959_flag=1_multi=64.0000_len=7947	Pisuviricota	d__Bacteria;p__Proteobacteria;c__Gammaproteobacteria;o__Enterobacterales;f__Enterobacteriaceae;g__Klebsiella;s__Klebsiella pneumoniae	23	0	0.00037
100262763	SRR18771403|k141_110972_flag=1_multi=21.0000_len=1753	Pisuviricota	d__Bacteria;p__Proteobacteria;c__Gammaproteobacteria;o__Enterobacterales;f__Enterobacteriaceae;g__Klebsiella;s__Klebsiella pneumoniae	23	0	0.00037
100262763	SRR11450585|k141_393922_flag=1_multi=11.9785_len=6779	Pisuviricota	d__Bacteria;p__Proteobacteria;c__Gammaproteobacteria;o__Enterobacterales;f__Enterobacteriaceae;g__Klebsiella;s__Klebsiella pneumoniae	23	0	0.00037
100262763	SRR11647857|k141_256089_flag=1_multi=53.7354_len=5197	Kitrinoviricota	d__Bacteria;p__Proteobacteria;c__Gammaproteobacteria;o__Enterobacterales;f__Enterobacteriaceae;g__Klebsiella;s__Klebsiella pneumoniae	24	0	0.000103
100262763	SRR12632510|k141_11461_flag=1_multi=36.0000_len=10839	Pisuviricota	d__Bacteria;p__Proteobacteria;c__Gammaproteobacteria;o__Enterobacterales;f__Enterobacteriaceae;g__Klebsiella;s__Klebsiella pneumoniae	23	0	0.00037
100262763	SRR11648176|k141_2385_flag=1_multi=24.0000_len=8655	Pisuviricota	d__Bacteria;p__Proteobacteria;c__Gammaproteobacteria;o__Enterobacterales;f__Enterobacteriaceae;g__Klebsiella;s__Klebsiella pneumoniae	23	0	0.00037
100262763	SRR12632522|k141_11554_flag=1_multi=1366.0000_len=2366	Lenarviricota	d__Bacteria;p__Proteobacteria;c__Gammaproteobacteria;o__Enterobacterales;f__Enterobacteriaceae;g__Klebsiella;s__Klebsiella pneumoniae	23	0	0.00037
100262763	SRR11648176|k141_1576_flag=1_multi=88.2328_len=8707	Pisuviricota	d__Bacteria;p__Proteobacteria;c__Gammaproteobacteria;o__Enterobacterales;f__Enterobacteriaceae;g__Klebsiella;s__Klebsiella pneumoniae	23	0	0.00037
100262763	SRR18771403|k141_12577_flag=1_multi=288.0000_len=8806	Pisuviricota	d__Bacteria;p__Proteobacteria;c__Gammaproteobacteria;o__Enterobacterales;f__Enterobacteriaceae;g__Klebsiella;s__Klebsiella pneumoniae	23	0	0.00037
100262763	SRR18771403|k141_26660_flag=1_multi=87.0000_len=8439	Pisuviricota	d__Bacteria;p__Proteobacteria;c__Gammaproteobacteria;o__Enterobacterales;f__Enterobacteriaceae;g__Klebsiella;s__Klebsiella pneumoniae	23	0	0.00037
100262763	BC-0345317873|k141_88724	Pisuviricota	d__Bacteria;p__Proteobacteria;c__Gammaproteobacteria;o__Enterobacterales;f__Enterobacteriaceae;g__Klebsiella;s__Klebsiella pneumoniae	24	0	0.000103
100262763	BC-0345318742|k141_798	Duplornaviricota	d__Bacteria;p__Proteobacteria;c__Gammaproteobacteria;o__Enterobacterales;f__Enterobacteriaceae;g__Klebsiella;s__Klebsiella pneumoniae	23	0	0.00037
100262763	SRR5829926|k141_235250_flag=1_multi=9.0000_len=9051	Pisuviricota	d__Bacteria;p__Proteobacteria;c__Gammaproteobacteria;o__Enterobacterales;f__Enterobacteriaceae;g__Klebsiella;s__Klebsiella pneumoniae	23	0	0.00037
100262763	SRR18771403|k141_151425_flag=1_multi=273.0000_len=4480	Lenarviricota	d__Bacteria;p__Proteobacteria;c__Gammaproteobacteria;o__Enterobacterales;f__Enterobacteriaceae;g__Klebsiella;s__Klebsiella pneumoniae	23	0	0.00037
100262763	SRR18770940|k141_130079_flag=1_multi=117.0000_len=2520	Pisuviricota	d__Bacteria;p__Proteobacteria;c__Gammaproteobacteria;o__Enterobacterales;f__Enterobacteriaceae;g__Klebsiella;s__Klebsiella pneumoniae	23	0	0.00037
100262763	SRR18771403|k141_7204_flag=1_multi=24.0000_len=3739	Kitrinoviricota	d__Bacteria;p__Proteobacteria;c__Gammaproteobacteria;o__Enterobacterales;f__Enterobacteriaceae;g__Klebsiella;s__Klebsiella pneumoniae	23	0	0.00037
100262763	SRR11450577|k141_193754_flag=1_multi=84.0000_len=8351	Pisuviricota	d__Bacteria;p__Proteobacteria;c__Gammaproteobacteria;o__Enterobacterales;f__Enterobacteriaceae;g__Klebsiella;s__Klebsiella pneumoniae	24	0	0.000103
100262763	SRR11450579|k141_6472_flag=1_multi=27.0000_len=10411	Kitrinoviricota	d__Bacteria;p__Proteobacteria;c__Gammaproteobacteria;o__Enterobacterales;f__Enterobacteriaceae;g__Klebsiella;s__Klebsiella pneumoniae	23	0	0.00037
100262763	SRR12632510|k141_128094_flag=1_multi=39.9044_len=2003	Pisuviricota	d__Bacteria;p__Proteobacteria;c__Gammaproteobacteria;o__Enterobacterales;f__Enterobacteriaceae;g__Klebsiella;s__Klebsiella pneumoniae	26	0	7.95e-06
100262763	SRR18770930|k141_46830_flag=1_multi=532.0000_len=9156	Pisuviricota	d__Bacteria;p__Proteobacteria;c__Gammaproteobacteria;o__Enterobacterales;f__Enterobacteriaceae;g__Klebsiella;s__Klebsiella pneumoniae	24	0	0.000103
100262763	SRR11828458|k141_115621_flag=1_multi=34.0000_len=5046	Kitrinoviricota	d__Bacteria;p__Proteobacteria;c__Gammaproteobacteria;o__Enterobacterales;f__Enterobacteriaceae;g__Klebsiella;s__Klebsiella pneumoniae	23	0	0.00037
100262763	SRR18771403|k141_60396_flag=1_multi=725.0000_len=9266	Pisuviricota	d__Bacteria;p__Proteobacteria;c__Gammaproteobacteria;o__Enterobacterales;f__Enterobacteriaceae;g__Klebsiella;s__Klebsiella pneumoniae	25	0	2.86e-05
100262763	SRR18770931|k141_95068_flag=1_multi=557.0000_len=11237	Pisuviricota	d__Bacteria;p__Proteobacteria;c__Gammaproteobacteria;o__Enterobacterales;f__Enterobacteriaceae;g__Klebsiella;s__Klebsiella pneumoniae	24	0	0.000103
100262763	SRR1582003|k119_19133_flag=1_multi=19.0000_len=2048	Unclassified	d__Bacteria;p__Proteobacteria;c__Gammaproteobacteria;o__Enterobacterales;f__Enterobacteriaceae;g__Klebsiella;s__Klebsiella pneumoniae	23	0	0.00037
100262763	SRR7539092|k141_497500_flag=1_multi=13.0000_len=9135	Pisuviricota	d__Bacteria;p__Proteobacteria;c__Gammaproteobacteria;o__Enterobacterales;f__Enterobacteriaceae;g__Klebsiella;s__Klebsiella pneumoniae	25	0	2.86e-05
100262763	SRR18770930|k141_113835_flag=1_multi=9.0000_len=1095	Pisuviricota	d__Bacteria;p__Proteobacteria;c__Gammaproteobacteria;o__Enterobacterales;f__Enterobacteriaceae;g__Klebsiella;s__Klebsiella pneumoniae	23	0	0.00037
100262763	SRR18770931|k141_10146_flag=1_multi=8296.0000_len=3027	Pisuviricota	d__Bacteria;p__Proteobacteria;c__Gammaproteobacteria;o__Enterobacterales;f__Enterobacteriaceae;g__Klebsiella;s__Klebsiella pneumoniae	23	0	0.00037
100262763	SRR7006911|k141_89368_flag=1_multi=7.0000_len=2823	Kitrinoviricota	d__Bacteria;p__Proteobacteria;c__Gammaproteobacteria;o__Enterobacterales;f__Enterobacteriaceae;g__Klebsiella;s__Klebsiella pneumoniae	23	0	0.00037
100262763	SRR18770940|k141_6846_flag=1_multi=13.0000_len=3731	Pisuviricota	d__Bacteria;p__Proteobacteria;c__Gammaproteobacteria;o__Enterobacterales;f__Enterobacteriaceae;g__Klebsiella;s__Klebsiella pneumoniae	23	0	0.00037
100262763	SRR17497103|k141_39072_flag=1_multi=16.8887_len=2072	Kitrinoviricota	d__Bacteria;p__Proteobacteria;c__Gammaproteobacteria;o__Enterobacterales;f__Enterobacteriaceae;g__Klebsiella;s__Klebsiella pneumoniae	24	0	0.000103
100262763	SRR11450579|k141_82454_flag=1_multi=132.9406_len=8333	Pisuviricota	d__Bacteria;p__Proteobacteria;c__Gammaproteobacteria;o__Enterobacterales;f__Enterobacteriaceae;g__Klebsiella;s__Klebsiella pneumoniae	24	0	0.000103
100262763	SRR12632511|k141_65187_flag=1_multi=94.0000_len=2549	Lenarviricota	d__Bacteria;p__Proteobacteria;c__Gammaproteobacteria;o__Enterobacterales;f__Enterobacteriaceae;g__Klebsiella;s__Klebsiella pneumoniae	23	0	0.00037
100262764	SRR11829260|k141_2197_flag=1_multi=57.0000_len=4196	Kitrinoviricota	d__Bacteria;p__Proteobacteria;c__Gammaproteobacteria;o__Enterobacterales;f__Enterobacteriaceae;g__Klebsiella;s__Klebsiella pneumoniae	22	0	0.0004
100262764	SRR12632511|k141_65187_flag=1_multi=94.0000_len=2549	Lenarviricota	d__Bacteria;p__Proteobacteria;c__Gammaproteobacteria;o__Enterobacterales;f__Enterobacteriaceae;g__Klebsiella;s__Klebsiella pneumoniae	22	0	0.0004
100262764	SRR11450579|k141_8046_flag=1_multi=195.0000_len=9745	Pisuviricota	d__Bacteria;p__Proteobacteria;c__Gammaproteobacteria;o__Enterobacterales;f__Enterobacteriaceae;g__Klebsiella;s__Klebsiella pneumoniae	22	0	0.0004
100262764	SRR12632522|k141_11554_flag=1_multi=1366.0000_len=2366	Lenarviricota	d__Bacteria;p__Proteobacteria;c__Gammaproteobacteria;o__Enterobacterales;f__Enterobacteriaceae;g__Klebsiella;s__Klebsiella pneumoniae	22	0	0.0004
100262764	SRR12632510|k141_11461_flag=1_multi=36.0000_len=10839	Pisuviricota	d__Bacteria;p__Proteobacteria;c__Gammaproteobacteria;o__Enterobacterales;f__Enterobacteriaceae;g__Klebsiella;s__Klebsiella pneumoniae	22	0	0.0004
100262764	SRR11450578|k141_3893_flag=1_multi=693.0000_len=9810	Pisuviricota	d__Bacteria;p__Proteobacteria;c__Gammaproteobacteria;o__Enterobacterales;f__Enterobacteriaceae;g__Klebsiella;s__Klebsiella pneumoniae	22	0	0.0004
100262764	BC-0302417267|k141_472	Kitrinoviricota	d__Bacteria;p__Proteobacteria;c__Gammaproteobacteria;o__Enterobacterales;f__Enterobacteriaceae;g__Klebsiella;s__Klebsiella pneumoniae	22	0	0.0004
100262764	SRR11648360|k141_2427_flag=0_multi=550.5579_len=8547	Pisuviricota	d__Bacteria;p__Proteobacteria;c__Gammaproteobacteria;o__Enterobacterales;f__Enterobacteriaceae;g__Klebsiella;s__Klebsiella pneumoniae	22	0	0.0004
100264755	SRR11828459|k141_18049_flag=1_multi=4.0000_len=1029	Duplornaviricota	d__Bacteria;p__Firmicutes_A;c__Clostridia;o__Peptostreptococcales;f__Peptostreptococcaceae;g__Clostridioides;s__Clostridioides difficile	29	1	1.11e-05
100280483	SRR11829101|k141_170810_flag=1_multi=15.0000_len=5608	Kitrinoviricota	d__Bacteria;p__Firmicutes_A;c__Clostridia;o__Peptostreptococcales;f__Peptostreptococcaceae;g__Clostridioides;s__Clostridioides difficile	30	0	1.11e-05
100284855	SRR11828459|k141_18049_flag=1_multi=4.0000_len=1029	Duplornaviricota	d__Bacteria;p__Firmicutes_A;c__Clostridia;o__Peptostreptococcales;f__Peptostreptococcaceae;g__Clostridioides;s__Clostridioides difficile	29	1	1.11e-05
100287280	SRR11829261|k141_152797_flag=1_multi=151.2792_len=2526	Kitrinoviricota	d__Bacteria;p__Firmicutes_A;c__Clostridia;o__Peptostreptococcales;f__Peptostreptococcaceae;g__Clostridioides;s__Clostridioides difficile	25	0	4.29e-05
100291579	SRR11828459|k141_18049_flag=1_multi=4.0000_len=1029	Duplornaviricota	d__Bacteria;p__Firmicutes_A;c__Clostridia;o__Peptostreptococcales;f__Peptostreptococcaceae;g__Clostridioides;s__Clostridioides difficile	29	1	1.11e-05
100295646	SRR11648413|k141_155839_flag=0_multi=32.5524_len=1714	Lenarviricota	d__Bacteria;p__Proteobacteria;c__Gammaproteobacteria;o__Enterobacterales;f__Enterobacteriaceae;g__Salmonella;s__Salmonella enterica	23	0	0.000333
100299775	SRR11829261|k141_152797_flag=1_multi=151.2792_len=2526	Kitrinoviricota	d__Bacteria;p__Firmicutes_A;c__Clostridia;o__Peptostreptococcales;f__Peptostreptococcaceae;g__Clostridioides;s__Clostridioides difficile	25	0	4.29e-05
100306124	SRR11829261|k141_152797_flag=1_multi=151.2792_len=2526	Kitrinoviricota	d__Bacteria;p__Firmicutes_A;c__Clostridia;o__Peptostreptococcales;f__Peptostreptococcaceae;g__Clostridioides;s__Clostridioides difficile	25	0	4.29e-05
100307338	SRR11648413|k141_155839_flag=0_multi=32.5524_len=1714	Lenarviricota	d__Bacteria;p__Proteobacteria;c__Gammaproteobacteria;o__Enterobacterales;f__Enterobacteriaceae;g__Salmonella;s__Salmonella enterica	23	0	0.000333
100310057	SRR11829261|k141_152797_flag=1_multi=151.2792_len=2526	Kitrinoviricota	d__Bacteria;p__Firmicutes_A;c__Clostridia;o__Peptostreptococcales;f__Peptostreptococcaceae;g__Clostridioides;s__Clostridioides difficile	25	0	4.29e-05
100316017	SRR11828459|k141_18049_flag=1_multi=4.0000_len=1029	Duplornaviricota	d__Bacteria;p__Firmicutes_A;c__Clostridia;o__Peptostreptococcales;f__Peptostreptococcaceae;g__Clostridioides;s__Clostridioides difficile	29	1	1.11e-05
100324060	SRR7535021|k141_104082_flag=1_multi=6.0000_len=4309	Lenarviricota	d__Bacteria;p__Proteobacteria;c__Gammaproteobacteria;o__Pseudomonadales;f__Moraxellaceae;g__Moraxella;s__Moraxella catarrhalis	26	1	0.00037
100333644	SRR11828459|k141_18049_flag=1_multi=4.0000_len=1029	Duplornaviricota	d__Bacteria;p__Firmicutes_A;c__Clostridia;o__Peptostreptococcales;f__Peptostreptococcaceae;g__Clostridioides;s__Clostridioides difficile	29	1	1.11e-05
100334339	SRR11828459|k141_18049_flag=1_multi=4.0000_len=1029	Duplornaviricota	d__Bacteria;p__Firmicutes_A;c__Clostridia;o__Peptostreptococcales;f__Peptostreptococcaceae;g__Clostridioides;s__Clostridioides difficile	29	1	1.11e-05
100344341	SRR11827439|k141_109350_flag=1_multi=4.0000_len=2497	Duplornaviricota	d__Bacteria;p__Firmicutes_A;c__Clostridia;o__Peptostreptococcales;f__Peptostreptococcaceae;g__Clostridioides;s__Clostridioides difficile	26	1	0.000481
100353774	SRR11828459|k141_18049_flag=1_multi=4.0000_len=1029	Duplornaviricota	d__Bacteria;p__Firmicutes_A;c__Clostridia;o__Peptostreptococcales;f__Peptostreptococcaceae;g__Clostridioides;s__Clostridioides difficile	29	1	1.11e-05
100357057	SRR11622779|k141_314830_flag=1_multi=14.0000_len=5204	Pisuviricota	d__Bacteria;p__Bacteroidota;c__Chlorobia;o__Chlorobiales;f__Chlorobiaceae;g__Chlorobium;s__Chlorobium sp012972825	25	0	3.15e-05
100359031	SRR11829261|k141_152797_flag=1_multi=151.2792_len=2526	Kitrinoviricota	d__Bacteria;p__Firmicutes_A;c__Clostridia;o__Peptostreptococcales;f__Peptostreptococcaceae;g__Clostridioides;s__Clostridioides difficile	25	0	4.29e-05
100364288	SRR11828459|k141_18049_flag=1_multi=4.0000_len=1029	Duplornaviricota	d__Bacteria;p__Firmicutes_A;c__Clostridia;o__Peptostreptococcales;f__Peptostreptococcaceae;g__Clostridioides;s__Clostridioides difficile	29	1	1.11e-05
100373695	SRR11829261|k141_152797_flag=1_multi=151.2792_len=2526	Kitrinoviricota	d__Bacteria;p__Firmicutes_A;c__Clostridia;o__Peptostreptococcales;f__Peptostreptococcaceae;g__Clostridioides;s__Clostridioides difficile	25	0	4.29e-05
100374860	SRR11828459|k141_18049_flag=1_multi=4.0000_len=1029	Duplornaviricota	d__Bacteria;p__Firmicutes_A;c__Clostridia;o__Peptostreptococcales;f__Peptostreptococcaceae;g__Clostridioides;s__Clostridioides difficile	29	1	1.11e-05
100389057	SRR17509920|k141_38381_flag=1_multi=17.0000_len=5302	Pisuviricota	d__Bacteria;p__Campylobacterota;c__Campylobacteria;o__Campylobacterales;f__Sulfurovaceae;g__UBA1140;s__UBA1140 sp006212005	26	1	0.000518
100389647	SRR11648413|k141_155839_flag=0_multi=32.5524_len=1714	Lenarviricota	d__Bacteria;p__Proteobacteria;c__Gammaproteobacteria;o__Enterobacterales;f__Enterobacteriaceae;g__Salmonella;s__Salmonella enterica	23	0	0.000333
100390120	SRR7004411|k141_98645_flag=1_multi=70.0000_len=9286	Pisuviricota	d__Bacteria;p__Firmicutes_A;c__Clostridia;o__TANB77;f__CAG-508;g__CAG-273;s__CAG-273 sp904420285	30	1	0.000481
100394021	SRR11828459|k141_18049_flag=1_multi=4.0000_len=1029	Duplornaviricota	d__Bacteria;p__Firmicutes_A;c__Clostridia;o__Peptostreptococcales;f__Peptostreptococcaceae;g__Clostridioides;s__Clostridioides difficile	29	1	1.11e-05
100394735	SRR11648413|k141_155839_flag=0_multi=32.5524_len=1714	Lenarviricota	d__Bacteria;p__Proteobacteria;c__Gammaproteobacteria;o__Enterobacterales;f__Enterobacteriaceae;g__Salmonella;s__Salmonella enterica	23	0	0.000333
100395903	SRR11829261|k141_152797_flag=1_multi=151.2792_len=2526	Kitrinoviricota	d__Bacteria;p__Firmicutes_A;c__Clostridia;o__Peptostreptococcales;f__Peptostreptococcaceae;g__Clostridioides;s__Clostridioides difficile	25	0	4.29e-05
100397536	SRR11828459|k141_18049_flag=1_multi=4.0000_len=1029	Duplornaviricota	d__Bacteria;p__Firmicutes_A;c__Clostridia;o__Peptostreptococcales;f__Peptostreptococcaceae;g__Clostridioides;s__Clostridioides difficile	29	1	1.11e-05
100398198	SRR11829261|k141_152797_flag=1_multi=151.2792_len=2526	Kitrinoviricota	d__Bacteria;p__Firmicutes_A;c__Clostridia;o__Peptostreptococcales;f__Peptostreptococcaceae;g__Clostridioides;s__Clostridioides difficile	35	2	3.42e-07
100398207	SRR11829261|k141_152797_flag=1_multi=151.2792_len=2526	Kitrinoviricota	d__Bacteria;p__Firmicutes_A;c__Clostridia;o__Peptostreptococcales;f__Peptostreptococcaceae;g__Clostridioides;s__Clostridioides difficile	35	2	3.42e-07
100413134	SRR11827439|k141_109350_flag=1_multi=4.0000_len=2497	Duplornaviricota	d__Bacteria;p__Firmicutes_A;c__Clostridia;o__Peptostreptococcales;f__Peptostreptococcaceae;g__Clostridioides;s__Clostridioides difficile	26	1	0.000518
100417795	SRR11829144|k141_41746_flag=1_multi=10.0000_len=6681	Pisuviricota	d__Bacteria;p__Proteobacteria;c__Gammaproteobacteria;o__Enterobacterales;f__Enterobacteriaceae;g__Salmonella;s__Salmonella enterica	25	0	2.57e-05
100421464	SRR11828459|k141_18049_flag=1_multi=4.0000_len=1029	Duplornaviricota	d__Bacteria;p__Firmicutes_A;c__Clostridia;o__Peptostreptococcales;f__Peptostreptococcaceae;g__Clostridioides;s__Clostridioides difficile	29	1	1.11e-05
100425205	SRR7538189|k141_291340_flag=1_multi=6.0000_len=2358	Kitrinoviricota	d__Bacteria;p__Firmicutes;c__Bacilli;o__Bacillales_D;f__Amphibacillaceae;g__Virgibacillus;s__Virgibacillus pantothenticus	26	1	0.000407
100426128	SRR11829261|k141_152797_flag=1_multi=151.2792_len=2526	Kitrinoviricota	d__Bacteria;p__Firmicutes_A;c__Clostridia;o__Peptostreptococcales;f__Peptostreptococcaceae;g__Clostridioides;s__Clostridioides difficile	25	0	4.29e-05
100430706	SRR7534265|k141_115420_flag=1_multi=82.0000_len=5738	Pisuviricota	d__Bacteria;p__Actinobacteriota;c__Actinomycetia;o__Actinomycetales;f__Bifidobacteriaceae;g__Bifidobacterium;s__Bifidobacterium breve	27	1	0.000134
100432611	SRR11829261|k141_152797_flag=1_multi=151.2792_len=2526	Kitrinoviricota	d__Bacteria;p__Firmicutes_A;c__Clostridia;o__Peptostreptococcales;f__Peptostreptococcaceae;g__Clostridioides;s__Clostridioides difficile	25	0	4.29e-05
100434158	SRR11648413|k141_155839_flag=0_multi=32.5524_len=1714	Lenarviricota	d__Bacteria;p__Proteobacteria;c__Gammaproteobacteria;o__Enterobacterales;f__Enterobacteriaceae;g__Salmonella;s__Salmonella enterica	23	0	0.000333
100442023	SRR11829261|k141_152797_flag=1_multi=151.2792_len=2526	Kitrinoviricota	d__Bacteria;p__Firmicutes_A;c__Clostridia;o__Peptostreptococcales;f__Peptostreptococcaceae;g__Clostridioides;s__Clostridioides difficile	25	0	4.29e-05
100447437	SRR11828459|k141_18049_flag=1_multi=4.0000_len=1029	Duplornaviricota	d__Bacteria;p__Firmicutes_A;c__Clostridia;o__Peptostreptococcales;f__Peptostreptococcaceae;g__Clostridioides;s__Clostridioides difficile	29	1	1.11e-05
100450289	SRR11649087|k141_89737_flag=1_multi=52.0000_len=3818	Lenarviricota	d__Bacteria;p__Firmicutes;c__Bacilli;o__Lactobacillales;f__Streptococcaceae;g__Streptococcus;s__Streptococcus equi	28	1	3.15e-05
100450761	SRR11648413|k141_155839_flag=0_multi=32.5524_len=1714	Lenarviricota	d__Bacteria;p__Proteobacteria;c__Gammaproteobacteria;o__Enterobacterales;f__Enterobacteriaceae;g__Salmonella;s__Salmonella enterica	23	0	0.000333
100452044	BC-0338275832|k141_142626	Lenarviricota	d__Archaea;p__Thermoproteota;c__Thermoproteia;o__Sulfolobales;f__Sulfolobaceae;g__Sulfuracidifex;s__Sulfuracidifex tepidarius	23	0	0.000629
100453276	SRR11829261|k141_152797_flag=1_multi=151.2792_len=2526	Kitrinoviricota	d__Bacteria;p__Firmicutes_A;c__Clostridia;o__Peptostreptococcales;f__Peptostreptococcaceae;g__Clostridioides;s__Clostridioides difficile	25	0	4.29e-05
100455848	SRR11076227|k141_564324_flag=1_multi=26.0000_len=9102	Negarnaviricota	d__Bacteria;p__Firmicutes;c__Bacilli;o__Lactobacillales;f__Streptococcaceae;g__Streptococcus;s__Streptococcus agalactiae	27	1	9.26e-05
100459367	SRR11829144|k141_41746_flag=1_multi=10.0000_len=6681	Pisuviricota	d__Bacteria;p__Proteobacteria;c__Gammaproteobacteria;o__Enterobacterales;f__Enterobacteriaceae;g__Salmonella;s__Salmonella enterica	25	0	2.57e-05
100467393	BC-0332573839|k141_32916	Kitrinoviricota	d__Bacteria;p__Proteobacteria;c__Gammaproteobacteria;o__Enterobacterales;f__Succinivibrionaceae;g__UBA2810;s__UBA2810 sp900317945	31	1	0.00036
100476350	SRR11827439|k141_109350_flag=1_multi=4.0000_len=2497	Duplornaviricota	d__Bacteria;p__Firmicutes_A;c__Clostridia;o__Peptostreptococcales;f__Peptostreptococcaceae;g__Clostridioides;s__Clostridioides difficile	26	1	0.000518
100478788	SRR11828459|k141_18049_flag=1_multi=4.0000_len=1029	Duplornaviricota	d__Bacteria;p__Firmicutes_A;c__Clostridia;o__Peptostreptococcales;f__Peptostreptococcaceae;g__Clostridioides;s__Clostridioides difficile	29	1	1.11e-05
100488494	SRR12686088|k141_14412_flag=1_multi=15.0000_len=5750	Pisuviricota	d__Bacteria;p__Firmicutes;c__Bacilli;o__Lactobacillales;f__Streptococcaceae;g__Streptococcus;s__Streptococcus pneumoniae	23	0	0.000777
100488494	BC-0302413540|k141_158	Kitrinoviricota	d__Bacteria;p__Firmicutes;c__Bacilli;o__Lactobacillales;f__Streptococcaceae;g__Streptococcus;s__Streptococcus pneumoniae	24	0	0.000216
100488494	SRR11648176|k141_60865_flag=1_multi=117.8157_len=8095	Pisuviricota	d__Bacteria;p__Firmicutes;c__Bacilli;o__Lactobacillales;f__Streptococcaceae;g__Streptococcus;s__Streptococcus pneumoniae	23	0	0.000777
100488494	SRR11648360|k141_238775_flag=1_multi=340.0000_len=9219	Pisuviricota	d__Bacteria;p__Firmicutes;c__Bacilli;o__Lactobacillales;f__Streptococcaceae;g__Streptococcus;s__Streptococcus pneumoniae	24	0	0.000216
100488494	SRR11648202|k141_322_flag=0_multi=521.7310_len=1955	Pisuviricota	d__Bacteria;p__Firmicutes;c__Bacilli;o__Lactobacillales;f__Streptococcaceae;g__Streptococcus;s__Streptococcus pneumoniae	24	0	0.000216
100488494	SRR11450579|k141_236588_flag=1_multi=105.0000_len=8198	Pisuviricota	d__Bacteria;p__Firmicutes;c__Bacilli;o__Lactobacillales;f__Streptococcaceae;g__Streptococcus;s__Streptococcus pneumoniae	23	0	0.000777
100488494	SRR11450580|k141_1194_flag=1_multi=129.0000_len=9098	Pisuviricota	d__Bacteria;p__Firmicutes;c__Bacilli;o__Lactobacillales;f__Streptococcaceae;g__Streptococcus;s__Streptococcus pneumoniae	28	0	0.000216
100488494	SRR11450586|k141_213458_flag=1_multi=6442.8094_len=10045	Pisuviricota	d__Bacteria;p__Firmicutes;c__Bacilli;o__Lactobacillales;f__Streptococcaceae;g__Streptococcus;s__Streptococcus pneumoniae	24	0	0.000216
100488494	SRR11450579|k141_17049_flag=1_multi=4764.0000_len=8934	Pisuviricota	d__Bacteria;p__Firmicutes;c__Bacilli;o__Lactobacillales;f__Streptococcaceae;g__Streptococcus;s__Streptococcus pneumoniae	24	0	0.000216
100488494	SRR11648360|k141_187449_flag=1_multi=2812.0000_len=9848	Pisuviricota	d__Bacteria;p__Firmicutes;c__Bacilli;o__Lactobacillales;f__Streptococcaceae;g__Streptococcus;s__Streptococcus pneumoniae	23	0	0.000777
100488494	SRR11648176|k141_1576_flag=1_multi=88.2328_len=8707	Pisuviricota	d__Bacteria;p__Firmicutes;c__Bacilli;o__Lactobacillales;f__Streptococcaceae;g__Streptococcus;s__Streptococcus pneumoniae	24	0	0.000216
100488494	SRR11450578|k141_2066_flag=1_multi=317.0000_len=8175	Pisuviricota	d__Bacteria;p__Firmicutes;c__Bacilli;o__Lactobacillales;f__Streptococcaceae;g__Streptococcus;s__Streptococcus pneumoniae	24	0	0.000216
100488494	SRR11648360|k141_2427_flag=0_multi=550.5579_len=8547	Pisuviricota	d__Bacteria;p__Firmicutes;c__Bacilli;o__Lactobacillales;f__Streptococcaceae;g__Streptococcus;s__Streptococcus pneumoniae	25	0	6e-05
100488494	BC-0345724490|k141_9515	Duplornaviricota	d__Bacteria;p__Firmicutes;c__Bacilli;o__Lactobacillales;f__Streptococcaceae;g__Streptococcus;s__Streptococcus pneumoniae	23	0	0.000777
100488494	SRR11828900|k141_55027_flag=1_multi=15.0000_len=8550	Pisuviricota	d__Bacteria;p__Firmicutes;c__Bacilli;o__Lactobacillales;f__Streptococcaceae;g__Streptococcus;s__Streptococcus pneumoniae	23	0	0.000777
100488494	BC-0345649514|k141_807	Pisuviricota	d__Bacteria;p__Firmicutes;c__Bacilli;o__Lactobacillales;f__Streptococcaceae;g__Streptococcus;s__Streptococcus pneumoniae	26	0	1.67e-05
100488494	BC-0345318769|k141_41055	Pisuviricota	d__Bacteria;p__Firmicutes;c__Bacilli;o__Lactobacillales;f__Streptococcaceae;g__Streptococcus;s__Streptococcus pneumoniae	24	0	0.000216
100488494	SRR11563379|k141_984_flag=1_multi=10.0000_len=5356	Pisuviricota	d__Bacteria;p__Firmicutes;c__Bacilli;o__Lactobacillales;f__Streptococcaceae;g__Streptococcus;s__Streptococcus pneumoniae	24	0	0.000216
100488494	SRR11450579|k141_76622_flag=1_multi=211.0000_len=8995	Pisuviricota	d__Bacteria;p__Firmicutes;c__Bacilli;o__Lactobacillales;f__Streptococcaceae;g__Streptococcus;s__Streptococcus pneumoniae	28	0	0.000216
100488494	SRR11450577|k141_1033_flag=1_multi=59.9742_len=2428	Pisuviricota	d__Bacteria;p__Firmicutes;c__Bacilli;o__Lactobacillales;f__Streptococcaceae;g__Streptococcus;s__Streptococcus pneumoniae	23	0	0.000777
100488494	SRR10904365|k141_287437_flag=1_multi=32.0000_len=4454	Kitrinoviricota	d__Bacteria;p__Firmicutes;c__Bacilli;o__Lactobacillales;f__Streptococcaceae;g__Streptococcus;s__Streptococcus pneumoniae	24	0	0.000216
100488494	SRR11450579|k141_3421_flag=1_multi=110.0000_len=8612	Pisuviricota	d__Bacteria;p__Firmicutes;c__Bacilli;o__Lactobacillales;f__Streptococcaceae;g__Streptococcus;s__Streptococcus pneumoniae	24	0	0.000216
100488494	SRR18771403|k141_110972_flag=1_multi=21.0000_len=1753	Pisuviricota	d__Bacteria;p__Firmicutes;c__Bacilli;o__Lactobacillales;f__Streptococcaceae;g__Streptococcus;s__Streptococcus pneumoniae	25	0	6e-05
100488494	SRR11649087|k141_263042_flag=1_multi=27.0000_len=4125	Kitrinoviricota	d__Bacteria;p__Firmicutes;c__Bacilli;o__Lactobacillales;f__Streptococcaceae;g__Streptococcus;s__Streptococcus pneumoniae	24	0	0.000216
100488494	SRR12685203|k141_1072_flag=1_multi=19.0000_len=4241	Kitrinoviricota	d__Bacteria;p__Firmicutes;c__Bacilli;o__Lactobacillales;f__Streptococcaceae;g__Streptococcus;s__Streptococcus pneumoniae	24	0	0.000216
100488494	SRR11450580|k141_109913_flag=1_multi=102.0000_len=6558	Pisuviricota	d__Bacteria;p__Firmicutes;c__Bacilli;o__Lactobacillales;f__Streptococcaceae;g__Streptococcus;s__Streptococcus pneumoniae	23	0	0.000777
100488494	SRR11649087|k141_77109_flag=1_multi=287.0000_len=9144	Pisuviricota	d__Bacteria;p__Firmicutes;c__Bacilli;o__Lactobacillales;f__Streptococcaceae;g__Streptococcus;s__Streptococcus pneumoniae	24	0	0.000216
100488494	SRR18771337|k141_6955_flag=1_multi=101.0000_len=2265	Pisuviricota	d__Bacteria;p__Firmicutes;c__Bacilli;o__Lactobacillales;f__Streptococcaceae;g__Streptococcus;s__Streptococcus pneumoniae	27	1	0.000216
100488494	SRR10849374|k141_328568_flag=1_multi=20.0000_len=3015	Lenarviricota	d__Bacteria;p__Firmicutes;c__Bacilli;o__Lactobacillales;f__Streptococcaceae;g__Streptococcus;s__Streptococcus pneumoniae	24	0	0.000216
100488494	SRR18770931|k141_10146_flag=1_multi=8296.0000_len=3027	Pisuviricota	d__Bacteria;p__Firmicutes;c__Bacilli;o__Lactobacillales;f__Streptococcaceae;g__Streptococcus;s__Streptococcus pneumoniae	23	0	0.000777
100488494	BC-0332571705|k141_1013	Kitrinoviricota	d__Bacteria;p__Firmicutes;c__Bacilli;o__Lactobacillales;f__Streptococcaceae;g__Streptococcus;s__Streptococcus pneumoniae	23	0	0.000777
100488494	BC-0345318789|k141_1934	Pisuviricota	d__Bacteria;p__Firmicutes;c__Bacilli;o__Lactobacillales;f__Streptococcaceae;g__Streptococcus;s__Streptococcus pneumoniae	23	0	0.000777
100488494	SRR18771403|k141_131354_flag=1_multi=48.8407_len=10690	Pisuviricota	d__Bacteria;p__Firmicutes;c__Bacilli;o__Lactobacillales;f__Streptococcaceae;g__Streptococcus;s__Streptococcus pneumoniae	24	0	0.000216
100488494	SRR11829143|k141_119731_flag=1_multi=545.5096_len=9090	Pisuviricota	d__Bacteria;p__Firmicutes;c__Bacilli;o__Lactobacillales;f__Streptococcaceae;g__Streptococcus;s__Streptococcus pneumoniae	26	0	1.67e-05
100488494	SRR5829926|k141_223325_flag=1_multi=36.0000_len=9335	Pisuviricota	d__Bacteria;p__Firmicutes;c__Bacilli;o__Lactobacillales;f__Streptococcaceae;g__Streptococcus;s__Streptococcus pneumoniae	23	0	0.000777
100488494	SRR11649087|k141_2929_flag=1_multi=251.0000_len=9689	Pisuviricota	d__Bacteria;p__Firmicutes;c__Bacilli;o__Lactobacillales;f__Streptococcaceae;g__Streptococcus;s__Streptococcus pneumoniae	24	0	0.000216
100488494	SRR11829144|k141_959_flag=1_multi=64.0000_len=7947	Pisuviricota	d__Bacteria;p__Firmicutes;c__Bacilli;o__Lactobacillales;f__Streptococcaceae;g__Streptococcus;s__Streptococcus pneumoniae	24	0	0.000216
100488494	BC-0345732070|k141_514	Pisuviricota	d__Bacteria;p__Firmicutes;c__Bacilli;o__Lactobacillales;f__Streptococcaceae;g__Streptococcus;s__Streptococcus pneumoniae	23	0	0.000777
100488494	SRR11450585|k141_393922_flag=1_multi=11.9785_len=6779	Pisuviricota	d__Bacteria;p__Firmicutes;c__Bacilli;o__Lactobacillales;f__Streptococcaceae;g__Streptococcus;s__Streptococcus pneumoniae	26	1	0.000777
100488494	SRR12632511|k141_65187_flag=1_multi=94.0000_len=2549	Lenarviricota	d__Bacteria;p__Firmicutes;c__Bacilli;o__Lactobacillales;f__Streptococcaceae;g__Streptococcus;s__Streptococcus pneumoniae	25	0	6e-05
100488494	SRR17481244|k141_434_flag=1_multi=161.0000_len=2746	Kitrinoviricota	d__Bacteria;p__Firmicutes;c__Bacilli;o__Lactobacillales;f__Streptococcaceae;g__Streptococcus;s__Streptococcus pneumoniae	24	0	0.000216
100488494	SRR11829260|k141_2197_flag=1_multi=57.0000_len=4196	Kitrinoviricota	d__Bacteria;p__Firmicutes;c__Bacilli;o__Lactobacillales;f__Streptococcaceae;g__Streptococcus;s__Streptococcus pneumoniae	25	0	6e-05
100488494	BC-0345318742|k141_63184	Pisuviricota	d__Bacteria;p__Firmicutes;c__Bacilli;o__Lactobacillales;f__Streptococcaceae;g__Streptococcus;s__Streptococcus pneumoniae	23	0	0.000777
100488494	SRR18771403|k141_2176_flag=1_multi=18.0000_len=4094	Pisuviricota	d__Bacteria;p__Firmicutes;c__Bacilli;o__Lactobacillales;f__Streptococcaceae;g__Streptococcus;s__Streptococcus pneumoniae	23	0	0.000777
100488494	BC-0345317873|k141_88724	Pisuviricota	d__Bacteria;p__Firmicutes;c__Bacilli;o__Lactobacillales;f__Streptococcaceae;g__Streptococcus;s__Streptococcus pneumoniae	23	0	0.000777
100488494	SRR11648176|k141_2385_flag=1_multi=24.0000_len=8655	Pisuviricota	d__Bacteria;p__Firmicutes;c__Bacilli;o__Lactobacillales;f__Streptococcaceae;g__Streptococcus;s__Streptococcus pneumoniae	24	0	0.000216
100488494	BC-0302417267|k141_472	Kitrinoviricota	d__Bacteria;p__Firmicutes;c__Bacilli;o__Lactobacillales;f__Streptococcaceae;g__Streptococcus;s__Streptococcus pneumoniae	25	0	6e-05
100488494	SRR11647857|k141_256089_flag=1_multi=53.7354_len=5197	Kitrinoviricota	d__Bacteria;p__Firmicutes;c__Bacilli;o__Lactobacillales;f__Streptococcaceae;g__Streptococcus;s__Streptococcus pneumoniae	23	0	0.000777
100488494	SRR18770940|k141_6846_flag=1_multi=13.0000_len=3731	Pisuviricota	d__Bacteria;p__Firmicutes;c__Bacilli;o__Lactobacillales;f__Streptococcaceae;g__Streptococcus;s__Streptococcus pneumoniae	24	0	0.000216
100488494	SRR12632522|k141_11554_flag=1_multi=1366.0000_len=2366	Lenarviricota	d__Bacteria;p__Firmicutes;c__Bacilli;o__Lactobacillales;f__Streptococcaceae;g__Streptococcus;s__Streptococcus pneumoniae	25	0	6e-05
100488494	SRR18770940|k141_130079_flag=1_multi=117.0000_len=2520	Pisuviricota	d__Bacteria;p__Firmicutes;c__Bacilli;o__Lactobacillales;f__Streptococcaceae;g__Streptococcus;s__Streptococcus pneumoniae	23	0	0.000777
100488494	SRR18770940|k141_131164_flag=1_multi=223.0000_len=8177	Pisuviricota	d__Bacteria;p__Firmicutes;c__Bacilli;o__Lactobacillales;f__Streptococcaceae;g__Streptococcus;s__Streptococcus pneumoniae	23	0	0.000777
100488494	SRR18771403|k141_12577_flag=1_multi=288.0000_len=8806	Pisuviricota	d__Bacteria;p__Firmicutes;c__Bacilli;o__Lactobacillales;f__Streptococcaceae;g__Streptococcus;s__Streptococcus pneumoniae	23	0	0.000777
100488494	SRR18771403|k141_22621_flag=1_multi=91.4202_len=8303	Pisuviricota	d__Bacteria;p__Firmicutes;c__Bacilli;o__Lactobacillales;f__Streptococcaceae;g__Streptococcus;s__Streptococcus pneumoniae	27	1	0.000216
100488494	SRR1582003|k119_19133_flag=1_multi=19.0000_len=2048	Unclassified	d__Bacteria;p__Firmicutes;c__Bacilli;o__Lactobacillales;f__Streptococcaceae;g__Streptococcus;s__Streptococcus pneumoniae	23	0	0.000777
100488494	SRR12632510|k141_128094_flag=1_multi=39.9044_len=2003	Pisuviricota	d__Bacteria;p__Firmicutes;c__Bacilli;o__Lactobacillales;f__Streptococcaceae;g__Streptococcus;s__Streptococcus pneumoniae	25	0	6e-05
100488494	SRR18771403|k141_12334_flag=1_multi=224.0000_len=9334	Pisuviricota	d__Bacteria;p__Firmicutes;c__Bacilli;o__Lactobacillales;f__Streptococcaceae;g__Streptococcus;s__Streptococcus pneumoniae	23	0	0.000777
100488494	BC-0345698157|k141_28560	Pisuviricota	d__Bacteria;p__Firmicutes;c__Bacilli;o__Lactobacillales;f__Streptococcaceae;g__Streptococcus;s__Streptococcus pneumoniae	25	0	6e-05
100488494	SRR11450580|k141_288389_flag=1_multi=108.0000_len=9065	Pisuviricota	d__Bacteria;p__Firmicutes;c__Bacilli;o__Lactobacillales;f__Streptococcaceae;g__Streptococcus;s__Streptococcus pneumoniae	23	0	0.000777
100488494	SRR18770930|k141_46830_flag=1_multi=532.0000_len=9156	Pisuviricota	d__Bacteria;p__Firmicutes;c__Bacilli;o__Lactobacillales;f__Streptococcaceae;g__Streptococcus;s__Streptococcus pneumoniae	26	0	1.67e-05
100488494	SRR18771403|k141_60396_flag=1_multi=725.0000_len=9266	Pisuviricota	d__Bacteria;p__Firmicutes;c__Bacilli;o__Lactobacillales;f__Streptococcaceae;g__Streptococcus;s__Streptococcus pneumoniae	24	0	0.000216
100488494	SRR18771403|k141_7204_flag=1_multi=24.0000_len=3739	Kitrinoviricota	d__Bacteria;p__Firmicutes;c__Bacilli;o__Lactobacillales;f__Streptococcaceae;g__Streptococcus;s__Streptococcus pneumoniae	23	0	0.000777
100488494	SRR5829926|k141_235250_flag=1_multi=9.0000_len=9051	Pisuviricota	d__Bacteria;p__Firmicutes;c__Bacilli;o__Lactobacillales;f__Streptococcaceae;g__Streptococcus;s__Streptococcus pneumoniae	24	0	0.000216
100488494	SRR12632510|k141_11461_flag=1_multi=36.0000_len=10839	Pisuviricota	d__Bacteria;p__Firmicutes;c__Bacilli;o__Lactobacillales;f__Streptococcaceae;g__Streptococcus;s__Streptococcus pneumoniae	25	0	6e-05
100488494	SRR17497103|k141_39072_flag=1_multi=16.8887_len=2072	Kitrinoviricota	d__Bacteria;p__Firmicutes;c__Bacilli;o__Lactobacillales;f__Streptococcaceae;g__Streptococcus;s__Streptococcus pneumoniae	23	0	0.000777
100488494	SRR11450579|k141_6472_flag=1_multi=27.0000_len=10411	Kitrinoviricota	d__Bacteria;p__Firmicutes;c__Bacilli;o__Lactobacillales;f__Streptococcaceae;g__Streptococcus;s__Streptococcus pneumoniae	23	0	0.000777
100488494	SRR18771403|k141_108006_flag=1_multi=36.0000_len=1192	Pisuviricota	d__Bacteria;p__Firmicutes;c__Bacilli;o__Lactobacillales;f__Streptococcaceae;g__Streptococcus;s__Streptococcus pneumoniae	23	0	0.000777
100488494	SRR7006911|k141_89368_flag=1_multi=7.0000_len=2823	Kitrinoviricota	d__Bacteria;p__Firmicutes;c__Bacilli;o__Lactobacillales;f__Streptococcaceae;g__Streptococcus;s__Streptococcus pneumoniae	23	0	0.000777
100488494	SRR18770930|k141_113835_flag=1_multi=9.0000_len=1095	Pisuviricota	d__Bacteria;p__Firmicutes;c__Bacilli;o__Lactobacillales;f__Streptococcaceae;g__Streptococcus;s__Streptococcus pneumoniae	23	0	0.000777
100488494	SRR18770918|k141_15596_flag=1_multi=75.0000_len=10756	Kitrinoviricota	d__Bacteria;p__Firmicutes;c__Bacilli;o__Lactobacillales;f__Streptococcaceae;g__Streptococcus;s__Streptococcus pneumoniae	23	0	0.000777
100488494	SRR11450579|k141_82454_flag=1_multi=132.9406_len=8333	Pisuviricota	d__Bacteria;p__Firmicutes;c__Bacilli;o__Lactobacillales;f__Streptococcaceae;g__Streptococcus;s__Streptococcus pneumoniae	23	0	0.000777
100488494	SRR18770931|k141_95068_flag=1_multi=557.0000_len=11237	Pisuviricota	d__Bacteria;p__Firmicutes;c__Bacilli;o__Lactobacillales;f__Streptococcaceae;g__Streptococcus;s__Streptococcus pneumoniae	24	0	0.000216
100488494	SRR18770930|k141_91419_flag=1_multi=78.0000_len=8939	Pisuviricota	d__Bacteria;p__Firmicutes;c__Bacilli;o__Lactobacillales;f__Streptococcaceae;g__Streptococcus;s__Streptococcus pneumoniae	25	0	6e-05
100488494	SRR7539092|k141_497500_flag=1_multi=13.0000_len=9135	Pisuviricota	d__Bacteria;p__Firmicutes;c__Bacilli;o__Lactobacillales;f__Streptococcaceae;g__Streptococcus;s__Streptococcus pneumoniae	23	0	0.000777
100488494	SRR18771403|k141_26660_flag=1_multi=87.0000_len=8439	Pisuviricota	d__Bacteria;p__Firmicutes;c__Bacilli;o__Lactobacillales;f__Streptococcaceae;g__Streptococcus;s__Streptococcus pneumoniae	25	0	6e-05
100488494	BC-0345318742|k141_798	Duplornaviricota	d__Bacteria;p__Firmicutes;c__Bacilli;o__Lactobacillales;f__Streptococcaceae;g__Streptococcus;s__Streptococcus pneumoniae	24	0	0.000216
100488494	SRR10664345|k141_11805_flag=1_multi=82.0000_len=2099	Pisuviricota	d__Bacteria;p__Firmicutes;c__Bacilli;o__Lactobacillales;f__Streptococcaceae;g__Streptococcus;s__Streptococcus pneumoniae	23	0	0.000777
100488494	SRR17497063|k141_241810_flag=1_multi=46.0000_len=2686	Pisuviricota	d__Bacteria;p__Firmicutes;c__Bacilli;o__Lactobacillales;f__Streptococcaceae;g__Streptococcus;s__Streptococcus pneumoniae	23	0	0.000777
100488494	SRR11450577|k141_193754_flag=1_multi=84.0000_len=8351	Pisuviricota	d__Bacteria;p__Firmicutes;c__Bacilli;o__Lactobacillales;f__Streptococcaceae;g__Streptococcus;s__Streptococcus pneumoniae	23	0	0.000777
100491470	SRR11828459|k141_18049_flag=1_multi=4.0000_len=1029	Duplornaviricota	d__Bacteria;p__Firmicutes_A;c__Clostridia;o__Peptostreptococcales;f__Peptostreptococcaceae;g__Clostridioides;s__Clostridioides difficile	29	1	1.11e-05
100494498	SRR11827439|k141_109350_flag=1_multi=4.0000_len=2497	Duplornaviricota	d__Bacteria;p__Firmicutes_A;c__Clostridia;o__Peptostreptococcales;f__Peptostreptococcaceae;g__Clostridioides;s__Clostridioides difficile	26	1	0.000481
100494759	SRR11622356|k141_291292_flag=1_multi=22.0000_len=7630	Pisuviricota	d__Bacteria;p__Proteobacteria;c__Gammaproteobacteria;o__Enterobacterales;f__Enterobacteriaceae;g__Salmonella;s__Salmonella enterica	25	0	2.57e-05
100505482	SRR11829261|k141_152797_flag=1_multi=151.2792_len=2526	Kitrinoviricota	d__Bacteria;p__Firmicutes_A;c__Clostridia;o__Peptostreptococcales;f__Peptostreptococcaceae;g__Clostridioides;s__Clostridioides difficile	25	0	4.29e-05
100505580	SRR5208455|k141_238906_flag=1_multi=8.0000_len=6507	Kitrinoviricota	d__Bacteria;p__Firmicutes_A;c__Clostridia;o__Clostridiales;f__Clostridiaceae;g__Clostridium_F;s__Clostridium_F botulinum	30	1	0.000518
100507347	SRR11828897|k141_26996_flag=1_multi=5.0000_len=2618	Unclassified	d__Bacteria;p__Nitrospirota;c__Thermodesulfovibrionia;o__Thermodesulfovibrionales;f__Magnetobacteriaceae;g__Magnetobacterium;s__Magnetobacterium sp002753685	26	1	0.000481
100512858	SRR11829261|k141_152797_flag=1_multi=151.2792_len=2526	Kitrinoviricota	d__Bacteria;p__Firmicutes_A;c__Clostridia;o__Peptostreptococcales;f__Peptostreptococcaceae;g__Clostridioides;s__Clostridioides difficile	25	0	4.29e-05
100515163	SRR11828459|k141_18049_flag=1_multi=4.0000_len=1029	Duplornaviricota	d__Bacteria;p__Firmicutes_A;c__Clostridia;o__Peptostreptococcales;f__Peptostreptococcaceae;g__Clostridioides;s__Clostridioides difficile	29	1	1.11e-05
100523206	SRR11829261|k141_152797_flag=1_multi=151.2792_len=2526	Kitrinoviricota	d__Bacteria;p__Firmicutes_A;c__Clostridia;o__Peptostreptococcales;f__Peptostreptococcaceae;g__Clostridioides;s__Clostridioides difficile	25	0	4.29e-05
100526618	SRR11829001|k141_10445_flag=1_multi=5.0000_len=2485	Lenarviricota	d__Bacteria;p__Proteobacteria;c__Gammaproteobacteria;o__Enterobacterales;f__Vibrionaceae;g__Vibrio;s__Vibrio cholerae	27	0	0.000333
100529188	SRR11076227|k141_564324_flag=1_multi=26.0000_len=9102	Negarnaviricota	d__Bacteria;p__Firmicutes;c__Bacilli;o__Lactobacillales;f__Streptococcaceae;g__Streptococcus;s__Streptococcus agalactiae	27	1	9.26e-05
100530366	SRR11829261|k141_152797_flag=1_multi=151.2792_len=2526	Kitrinoviricota	d__Bacteria;p__Firmicutes_A;c__Clostridia;o__Peptostreptococcales;f__Peptostreptococcaceae;g__Clostridioides;s__Clostridioides difficile	25	0	4.29e-05
100533168	SRR18771337|k141_161629_flag=1_multi=81.0000_len=8259	Pisuviricota	d__Bacteria;p__Chloroflexota;c__UBA11872;o__UBA11872;f__VXNJ01;g__VXNJ01;s__VXNJ01 sp009840625	30	1	0.000518
100534619	SRR17509951|k141_4584_flag=1_multi=7.0000_len=1091	Pisuviricota	d__Bacteria;p__Firmicutes;c__Bacilli;o__Staphylococcales;f__Staphylococcaceae;g__Staphylococcus;s__Staphylococcus haemolyticus	29	1	7.95e-06
100539151	SRR11829261|k141_152797_flag=1_multi=151.2792_len=2526	Kitrinoviricota	d__Bacteria;p__Firmicutes_A;c__Clostridia;o__Peptostreptococcales;f__Peptostreptococcaceae;g__Clostridioides;s__Clostridioides difficile	25	0	4.29e-05
100544057	SRR7536466|k141_280789_flag=1_multi=14.0000_len=9202	Pisuviricota	d__Bacteria;p__Proteobacteria;c__Gammaproteobacteria;o__Burkholderiales;f__Neisseriaceae;g__Neisseria;s__Neisseria meningitidis	26	1	0.000296
100544727	SRR11829261|k141_152797_flag=1_multi=151.2792_len=2526	Kitrinoviricota	d__Bacteria;p__Firmicutes_A;c__Clostridia;o__Peptostreptococcales;f__Peptostreptococcaceae;g__Clostridioides;s__Clostridioides difficile	25	0	4.29e-05
100551239	SRR11829261|k141_152797_flag=1_multi=151.2792_len=2526	Kitrinoviricota	d__Bacteria;p__Firmicutes_A;c__Clostridia;o__Peptostreptococcales;f__Peptostreptococcaceae;g__Clostridioides;s__Clostridioides difficile	25	0	4.29e-05
100551424	SRR12658570|k141_167726_flag=1_multi=30.0000_len=8868	Pisuviricota	d__Bacteria;p__Firmicutes;c__Bacilli;o__Lactobacillales;f__Streptococcaceae;g__Streptococcus;s__Streptococcus equi	26	1	0.000444
100551619	SRR11828459|k141_18049_flag=1_multi=4.0000_len=1029	Duplornaviricota	d__Bacteria;p__Firmicutes_A;c__Clostridia;o__Peptostreptococcales;f__Peptostreptococcaceae;g__Clostridioides;s__Clostridioides difficile	29	1	1.11e-05
100563489	SRR7536466|k141_280789_flag=1_multi=14.0000_len=9202	Pisuviricota	d__Bacteria;p__Proteobacteria;c__Gammaproteobacteria;o__Burkholderiales;f__Neisseriaceae;g__Neisseria;s__Neisseria meningitidis	26	1	0.000296
100566928	SRR11828459|k141_18049_flag=1_multi=4.0000_len=1029	Duplornaviricota	d__Bacteria;p__Firmicutes_A;c__Clostridia;o__Peptostreptococcales;f__Peptostreptococcaceae;g__Clostridioides;s__Clostridioides difficile	29	1	1.11e-05
100573387	SRR11648413|k141_155839_flag=0_multi=32.5524_len=1714	Lenarviricota	d__Bacteria;p__Proteobacteria;c__Gammaproteobacteria;o__Enterobacterales;f__Enterobacteriaceae;g__Salmonella;s__Salmonella enterica	23	0	0.000333
100580283	SRR17481242|k141_14860_flag=1_multi=140.0000_len=3974	Unclassified	d__Bacteria;p__Gemmatimonadota;c__Gemmatimonadetes;o__Gemmatimonadales;f__Gemmatimonadaceae;g__SCN-70-22;s__SCN-70-22 sp016719105	46	6	1.47e-06
100580283	SRR11828805|k141_11533_flag=1_multi=89.8329_len=3648	Kitrinoviricota	d__Bacteria;p__Gemmatimonadota;c__Gemmatimonadetes;o__Gemmatimonadales;f__Gemmatimonadaceae;g__SCN-70-22;s__SCN-70-22 sp016719105	32	1	6.86e-05
100580283	SRR17509979|k141_54497_flag=1_multi=434.0000_len=1853	Pisuviricota	d__Bacteria;p__Gemmatimonadota;c__Gemmatimonadetes;o__Gemmatimonadales;f__Gemmatimonadaceae;g__SCN-70-22;s__SCN-70-22 sp016719105	46	6	1.47e-06
100580283	BC-0345298860|k141_3179	Lenarviricota	d__Bacteria;p__Gemmatimonadota;c__Gemmatimonadetes;o__Gemmatimonadales;f__Gemmatimonadaceae;g__SCN-70-22;s__SCN-70-22 sp016719105	31	1	1.47e-06
100580283	SRR11648176|k141_298601_flag=1_multi=36.0000_len=3120	Kitrinoviricota	d__Bacteria;p__Gemmatimonadota;c__Gemmatimonadetes;o__Gemmatimonadales;f__Gemmatimonadaceae;g__SCN-70-22;s__SCN-70-22 sp016719105	31	1	1.47e-06
100580283	SRR10849374|k141_218357_flag=1_multi=12.0000_len=3750	Lenarviricota	d__Bacteria;p__Gemmatimonadota;c__Gemmatimonadetes;o__Gemmatimonadales;f__Gemmatimonadaceae;g__SCN-70-22;s__SCN-70-22 sp016719105	31	1	1.47e-06
100580283	SRR11829331|k141_332492_flag=1_multi=252.0000_len=4351	Lenarviricota	d__Bacteria;p__Gemmatimonadota;c__Gemmatimonadetes;o__Gemmatimonadales;f__Gemmatimonadaceae;g__SCN-70-22;s__SCN-70-22 sp016719105	46	6	1.47e-06
100580283	SRR18771403|k141_131354_flag=1_multi=48.8407_len=10690	Pisuviricota	d__Bacteria;p__Gemmatimonadota;c__Gemmatimonadetes;o__Gemmatimonadales;f__Gemmatimonadaceae;g__SCN-70-22;s__SCN-70-22 sp016719105	31	1	1.47e-06
100580283	SRR17509979|k141_28799_flag=1_multi=182.0000_len=1917	Pisuviricota	d__Bacteria;p__Gemmatimonadota;c__Gemmatimonadetes;o__Gemmatimonadales;f__Gemmatimonadaceae;g__SCN-70-22;s__SCN-70-22 sp016719105	31	1	1.47e-06
100580283	SRR17509978|k141_111246_flag=1_multi=25.3407_len=1855	Pisuviricota	d__Bacteria;p__Gemmatimonadota;c__Gemmatimonadetes;o__Gemmatimonadales;f__Gemmatimonadaceae;g__SCN-70-22;s__SCN-70-22 sp016719105	31	1	1.47e-06
100580283	SRR17481244|k141_92016_flag=1_multi=44.0000_len=3519	Lenarviricota	d__Bacteria;p__Gemmatimonadota;c__Gemmatimonadetes;o__Gemmatimonadales;f__Gemmatimonadaceae;g__SCN-70-22;s__SCN-70-22 sp016719105	31	1	1.47e-06
100580283	SRR17497054|k141_191824_flag=1_multi=13.0000_len=2259	Pisuviricota	d__Bacteria;p__Gemmatimonadota;c__Gemmatimonadetes;o__Gemmatimonadales;f__Gemmatimonadaceae;g__SCN-70-22;s__SCN-70-22 sp016719105	31	1	1.47e-06
100580283	SRR11648360|k141_236875_flag=1_multi=13.0000_len=4864	urv.p.001	d__Bacteria;p__Gemmatimonadota;c__Gemmatimonadetes;o__Gemmatimonadales;f__Gemmatimonadaceae;g__SCN-70-22;s__SCN-70-22 sp016719105	29	0	6.86e-05
100580283	SRR17497068|k141_144847_flag=1_multi=37.7881_len=1816	Pisuviricota	d__Bacteria;p__Gemmatimonadota;c__Gemmatimonadetes;o__Gemmatimonadales;f__Gemmatimonadaceae;g__SCN-70-22;s__SCN-70-22 sp016719105	31	1	1.47e-06
100580283	SRR17509979|k141_52575_flag=1_multi=83.6741_len=1804	Pisuviricota	d__Bacteria;p__Gemmatimonadota;c__Gemmatimonadetes;o__Gemmatimonadales;f__Gemmatimonadaceae;g__SCN-70-22;s__SCN-70-22 sp016719105	46	6	1.47e-06
100580283	SRR10849744|k141_310535_flag=1_multi=101.0000_len=3955	Lenarviricota	d__Bacteria;p__Gemmatimonadota;c__Gemmatimonadetes;o__Gemmatimonadales;f__Gemmatimonadaceae;g__SCN-70-22;s__SCN-70-22 sp016719105	32	1	4.1e-07
100580283	SRR17509979|k141_53443_flag=1_multi=169.8080_len=4630	Kitrinoviricota	d__Bacteria;p__Gemmatimonadota;c__Gemmatimonadetes;o__Gemmatimonadales;f__Gemmatimonadaceae;g__SCN-70-22;s__SCN-70-22 sp016719105	46	6	1.47e-06
100580283	SRR17509940|k141_117101_flag=1_multi=38.0000_len=2457	Duplornaviricota	d__Bacteria;p__Gemmatimonadota;c__Gemmatimonadetes;o__Gemmatimonadales;f__Gemmatimonadaceae;g__SCN-70-22;s__SCN-70-22 sp016719105	27	0	0.000888
100580283	SRR17497098|k141_13697_flag=1_multi=34.0000_len=1851	Pisuviricota	d__Bacteria;p__Gemmatimonadota;c__Gemmatimonadetes;o__Gemmatimonadales;f__Gemmatimonadaceae;g__SCN-70-22;s__SCN-70-22 sp016719105	31	1	1.47e-06
100580283	SRR17509977|k141_156580_flag=1_multi=3.0000_len=1406	Pisuviricota	d__Bacteria;p__Gemmatimonadota;c__Gemmatimonadetes;o__Gemmatimonadales;f__Gemmatimonadaceae;g__SCN-70-22;s__SCN-70-22 sp016719105	30	0	1.14e-07
100580283	SRR11450585|k141_260925_flag=1_multi=20.0000_len=6420	Unclassified	d__Bacteria;p__Gemmatimonadota;c__Gemmatimonadetes;o__Gemmatimonadales;f__Gemmatimonadaceae;g__SCN-70-22;s__SCN-70-22 sp016719105	31	1	1.47e-06
100580283	SRR17497064|k141_135790_flag=1_multi=52.0000_len=1739	Pisuviricota	d__Bacteria;p__Gemmatimonadota;c__Gemmatimonadetes;o__Gemmatimonadales;f__Gemmatimonadaceae;g__SCN-70-22;s__SCN-70-22 sp016719105	46	6	1.47e-06
100580283	SRR18770931|k141_53716_flag=1_multi=6.0000_len=1000	Lenarviricota	d__Bacteria;p__Gemmatimonadota;c__Gemmatimonadetes;o__Gemmatimonadales;f__Gemmatimonadaceae;g__SCN-70-22;s__SCN-70-22 sp016719105	33	1	0.000888
100580283	SRR5829964|k141_20917_flag=1_multi=123.0000_len=1791	Kitrinoviricota	d__Bacteria;p__Gemmatimonadota;c__Gemmatimonadetes;o__Gemmatimonadales;f__Gemmatimonadaceae;g__SCN-70-22;s__SCN-70-22 sp016719105	31	1	0.000247
100580283	SRR14530880|k119_2620_flag=1_multi=62.0000_len=4380	Kitrinoviricota	d__Bacteria;p__Gemmatimonadota;c__Gemmatimonadetes;o__Gemmatimonadales;f__Gemmatimonadaceae;g__SCN-70-22;s__SCN-70-22 sp016719105	31	1	1.47e-06
100580283	SRR17497092|k141_33398_flag=1_multi=217.0121_len=1878	Pisuviricota	d__Bacteria;p__Gemmatimonadota;c__Gemmatimonadetes;o__Gemmatimonadales;f__Gemmatimonadaceae;g__SCN-70-22;s__SCN-70-22 sp016719105	46	6	1.47e-06
100580283	SRR17509979|k141_11840_flag=1_multi=73.0000_len=1384	Pisuviricota	d__Bacteria;p__Gemmatimonadota;c__Gemmatimonadetes;o__Gemmatimonadales;f__Gemmatimonadaceae;g__SCN-70-22;s__SCN-70-22 sp016719105	31	1	0.000247
100580283	SRR11450579|k141_22903_flag=1_multi=93.0000_len=8250	Pisuviricota	d__Bacteria;p__Gemmatimonadota;c__Gemmatimonadetes;o__Gemmatimonadales;f__Gemmatimonadaceae;g__SCN-70-22;s__SCN-70-22 sp016719105	28	0	0.000247
100580283	SRR17509979|k141_62709_flag=1_multi=44.0000_len=2751	Pisuviricota	d__Bacteria;p__Gemmatimonadota;c__Gemmatimonadetes;o__Gemmatimonadales;f__Gemmatimonadaceae;g__SCN-70-22;s__SCN-70-22 sp016719105	32	1	6.86e-05
100580283	SRR17497126|k141_95757_flag=1_multi=826.0000_len=3116	Lenarviricota	d__Bacteria;p__Gemmatimonadota;c__Gemmatimonadetes;o__Gemmatimonadales;f__Gemmatimonadaceae;g__SCN-70-22;s__SCN-70-22 sp016719105	29	1	1.91e-05
100580283	SRR17509979|k141_40329_flag=1_multi=17.0000_len=1013	Pisuviricota	d__Bacteria;p__Gemmatimonadota;c__Gemmatimonadetes;o__Gemmatimonadales;f__Gemmatimonadaceae;g__SCN-70-22;s__SCN-70-22 sp016719105	30	1	0.000888
100580283	BC-0332570062|k141_61782	Lenarviricota	d__Bacteria;p__Gemmatimonadota;c__Gemmatimonadetes;o__Gemmatimonadales;f__Gemmatimonadaceae;g__SCN-70-22;s__SCN-70-22 sp016719105	31	1	1.47e-06
100580283	SRR17509976|k141_164083_flag=1_multi=58.0000_len=4337	Pisuviricota	d__Bacteria;p__Gemmatimonadota;c__Gemmatimonadetes;o__Gemmatimonadales;f__Gemmatimonadaceae;g__SCN-70-22;s__SCN-70-22 sp016719105	28	0	0.000247
100580283	SRR17509977|k141_51278_flag=1_multi=666.0000_len=6190	Pisuviricota	d__Bacteria;p__Gemmatimonadota;c__Gemmatimonadetes;o__Gemmatimonadales;f__Gemmatimonadaceae;g__SCN-70-22;s__SCN-70-22 sp016719105	31	0	5.3e-06
100580283	SRR17509967|k141_44924_flag=1_multi=7.0000_len=2320	Pisuviricota	d__Bacteria;p__Gemmatimonadota;c__Gemmatimonadetes;o__Gemmatimonadales;f__Gemmatimonadaceae;g__SCN-70-22;s__SCN-70-22 sp016719105	31	1	0.000247
100580283	SRR17481244|k141_53629_flag=1_multi=27.0000_len=3662	Lenarviricota	d__Bacteria;p__Gemmatimonadota;c__Gemmatimonadetes;o__Gemmatimonadales;f__Gemmatimonadaceae;g__SCN-70-22;s__SCN-70-22 sp016719105	32	1	6.86e-05
100580283	SRR17509976|k141_100049_flag=1_multi=72.0000_len=1862	Pisuviricota	d__Bacteria;p__Gemmatimonadota;c__Gemmatimonadetes;o__Gemmatimonadales;f__Gemmatimonadaceae;g__SCN-70-22;s__SCN-70-22 sp016719105	32	1	6.86e-05
100580286	SRR12685024|k141_131206_flag=1_multi=12.0000_len=3956	Pisuviricota	d__Bacteria;p__Gemmatimonadota;c__Gemmatimonadetes;o__Gemmatimonadales;f__Gemmatimonadaceae;g__SCN-70-22;s__SCN-70-22 sp016719105	26	0	9.54e-06
100580287	SRR14530880|k119_2620_flag=1_multi=62.0000_len=4380	Kitrinoviricota	d__Bacteria;p__Gemmatimonadota;c__Gemmatimonadetes;o__Gemmatimonadales;f__Gemmatimonadaceae;g__SCN-70-22;s__SCN-70-22 sp016719105	37	0	3.47e-09
100580287	SRR17497098|k141_13697_flag=1_multi=34.0000_len=1851	Pisuviricota	d__Bacteria;p__Gemmatimonadota;c__Gemmatimonadetes;o__Gemmatimonadales;f__Gemmatimonadaceae;g__SCN-70-22;s__SCN-70-22 sp016719105	35	0	4.49e-08
100580287	SRR17497126|k141_68629_flag=1_multi=6.0000_len=1048	Pisuviricota	d__Bacteria;p__Gemmatimonadota;c__Gemmatimonadetes;o__Gemmatimonadales;f__Gemmatimonadaceae;g__SCN-70-22;s__SCN-70-22 sp016719105	24	0	0.00035
100580287	SRR11450579|k141_22903_flag=1_multi=93.0000_len=8250	Pisuviricota	d__Bacteria;p__Gemmatimonadota;c__Gemmatimonadetes;o__Gemmatimonadales;f__Gemmatimonadaceae;g__SCN-70-22;s__SCN-70-22 sp016719105	27	0	7.51e-06
100580287	SRR17509940|k141_117101_flag=1_multi=38.0000_len=2457	Duplornaviricota	d__Bacteria;p__Gemmatimonadota;c__Gemmatimonadetes;o__Gemmatimonadales;f__Gemmatimonadaceae;g__SCN-70-22;s__SCN-70-22 sp016719105	27	0	7.51e-06
100580287	SRR17481244|k141_92016_flag=1_multi=44.0000_len=3519	Lenarviricota	d__Bacteria;p__Gemmatimonadota;c__Gemmatimonadetes;o__Gemmatimonadales;f__Gemmatimonadaceae;g__SCN-70-22;s__SCN-70-22 sp016719105	35	0	4.49e-08
100580287	SRR17497064|k141_128537_flag=1_multi=9.0000_len=1004	Pisuviricota	d__Bacteria;p__Gemmatimonadota;c__Gemmatimonadetes;o__Gemmatimonadales;f__Gemmatimonadaceae;g__SCN-70-22;s__SCN-70-22 sp016719105	31	1	2.09e-06
100580287	SRR17497054|k141_191824_flag=1_multi=13.0000_len=2259	Pisuviricota	d__Bacteria;p__Gemmatimonadota;c__Gemmatimonadetes;o__Gemmatimonadales;f__Gemmatimonadaceae;g__SCN-70-22;s__SCN-70-22 sp016719105	42	0	2.68e-10
100580287	BC-0332570062|k141_61782	Lenarviricota	d__Bacteria;p__Gemmatimonadota;c__Gemmatimonadetes;o__Gemmatimonadales;f__Gemmatimonadaceae;g__SCN-70-22;s__SCN-70-22 sp016719105	31	0	4.49e-08
100580287	SRR17497049|k141_87067_flag=1_multi=464.0000_len=3624	Lenarviricota	d__Bacteria;p__Gemmatimonadota;c__Gemmatimonadetes;o__Gemmatimonadales;f__Gemmatimonadaceae;g__SCN-70-22;s__SCN-70-22 sp016719105	41	4	9.72e-05
100580287	SRR10849744|k141_310535_flag=1_multi=101.0000_len=3955	Lenarviricota	d__Bacteria;p__Gemmatimonadota;c__Gemmatimonadetes;o__Gemmatimonadales;f__Gemmatimonadaceae;g__SCN-70-22;s__SCN-70-22 sp016719105	36	0	7.46e-11
100580287	SRR17497064|k141_135790_flag=1_multi=52.0000_len=1739	Pisuviricota	d__Bacteria;p__Gemmatimonadota;c__Gemmatimonadetes;o__Gemmatimonadales;f__Gemmatimonadaceae;g__SCN-70-22;s__SCN-70-22 sp016719105	53	3	4.46e-13
100580287	SRR17509979|k141_28799_flag=1_multi=182.0000_len=1917	Pisuviricota	d__Bacteria;p__Gemmatimonadota;c__Gemmatimonadetes;o__Gemmatimonadales;f__Gemmatimonadaceae;g__SCN-70-22;s__SCN-70-22 sp016719105	52	1	5.77e-12
100580287	BC-0345298860|k141_3179	Lenarviricota	d__Bacteria;p__Gemmatimonadota;c__Gemmatimonadetes;o__Gemmatimonadales;f__Gemmatimonadaceae;g__SCN-70-22;s__SCN-70-22 sp016719105	53	4	1.24e-13
100580287	SRR11648360|k141_236875_flag=1_multi=13.0000_len=4864	urv.p.001	d__Bacteria;p__Gemmatimonadota;c__Gemmatimonadetes;o__Gemmatimonadales;f__Gemmatimonadaceae;g__SCN-70-22;s__SCN-70-22 sp016719105	29	0	5.81e-07
100580287	SRR17497069|k141_154292_flag=1_multi=166.0000_len=1714	Pisuviricota	d__Bacteria;p__Gemmatimonadota;c__Gemmatimonadetes;o__Gemmatimonadales;f__Gemmatimonadaceae;g__SCN-70-22;s__SCN-70-22 sp016719105	31	1	2.09e-06
100580287	SRR10849374|k141_218357_flag=1_multi=12.0000_len=3750	Lenarviricota	d__Bacteria;p__Gemmatimonadota;c__Gemmatimonadetes;o__Gemmatimonadales;f__Gemmatimonadaceae;g__SCN-70-22;s__SCN-70-22 sp016719105	35	0	4.49e-08
100580287	SRR17509976|k141_164083_flag=1_multi=58.0000_len=4337	Pisuviricota	d__Bacteria;p__Gemmatimonadota;c__Gemmatimonadetes;o__Gemmatimonadales;f__Gemmatimonadaceae;g__SCN-70-22;s__SCN-70-22 sp016719105	34	2	2.09e-06
100580287	SRR17509979|k141_52575_flag=1_multi=83.6741_len=1804	Pisuviricota	d__Bacteria;p__Gemmatimonadota;c__Gemmatimonadetes;o__Gemmatimonadales;f__Gemmatimonadaceae;g__SCN-70-22;s__SCN-70-22 sp016719105	53	3	4.46e-13
100580287	SRR17509977|k141_51278_flag=1_multi=666.0000_len=6190	Pisuviricota	d__Bacteria;p__Gemmatimonadota;c__Gemmatimonadetes;o__Gemmatimonadales;f__Gemmatimonadaceae;g__SCN-70-22;s__SCN-70-22 sp016719105	36	1	3.47e-09
100580287	SRR17509979|k141_53443_flag=1_multi=169.8080_len=4630	Kitrinoviricota	d__Bacteria;p__Gemmatimonadota;c__Gemmatimonadetes;o__Gemmatimonadales;f__Gemmatimonadaceae;g__SCN-70-22;s__SCN-70-22 sp016719105	53	4	1.24e-13
100580287	SRR5829964|k141_20917_flag=1_multi=123.0000_len=1791	Kitrinoviricota	d__Bacteria;p__Gemmatimonadota;c__Gemmatimonadetes;o__Gemmatimonadales;f__Gemmatimonadaceae;g__SCN-70-22;s__SCN-70-22 sp016719105	31	1	0.00035
100580287	SRR11828805|k141_11533_flag=1_multi=89.8329_len=3648	Kitrinoviricota	d__Bacteria;p__Gemmatimonadota;c__Gemmatimonadetes;o__Gemmatimonadales;f__Gemmatimonadaceae;g__SCN-70-22;s__SCN-70-22 sp016719105	41	1	9.65e-10
100580287	SRR11829331|k141_332492_flag=1_multi=252.0000_len=4351	Lenarviricota	d__Bacteria;p__Gemmatimonadota;c__Gemmatimonadetes;o__Gemmatimonadales;f__Gemmatimonadaceae;g__SCN-70-22;s__SCN-70-22 sp016719105	53	4	1.24e-13
100580287	SRR17497092|k141_33398_flag=1_multi=217.0121_len=1878	Pisuviricota	d__Bacteria;p__Gemmatimonadota;c__Gemmatimonadetes;o__Gemmatimonadales;f__Gemmatimonadaceae;g__SCN-70-22;s__SCN-70-22 sp016719105	53	4	1.24e-13
100580287	SRR11648176|k141_298601_flag=1_multi=36.0000_len=3120	Kitrinoviricota	d__Bacteria;p__Gemmatimonadota;c__Gemmatimonadetes;o__Gemmatimonadales;f__Gemmatimonadaceae;g__SCN-70-22;s__SCN-70-22 sp016719105	57	4	7.41e-16
100580287	SRR17509978|k141_111246_flag=1_multi=25.3407_len=1855	Pisuviricota	d__Bacteria;p__Gemmatimonadota;c__Gemmatimonadetes;o__Gemmatimonadales;f__Gemmatimonadaceae;g__SCN-70-22;s__SCN-70-22 sp016719105	41	2	2.68e-10
100580287	SRR17509967|k141_44924_flag=1_multi=7.0000_len=2320	Pisuviricota	d__Bacteria;p__Gemmatimonadota;c__Gemmatimonadetes;o__Gemmatimonadales;f__Gemmatimonadaceae;g__SCN-70-22;s__SCN-70-22 sp016719105	38	1	2.09e-06
100580287	SRR17509977|k141_156580_flag=1_multi=3.0000_len=1406	Pisuviricota	d__Bacteria;p__Gemmatimonadota;c__Gemmatimonadetes;o__Gemmatimonadales;f__Gemmatimonadaceae;g__SCN-70-22;s__SCN-70-22 sp016719105	36	1	5.81e-07
100580287	SRR18771403|k141_131354_flag=1_multi=48.8407_len=10690	Pisuviricota	d__Bacteria;p__Gemmatimonadota;c__Gemmatimonadetes;o__Gemmatimonadales;f__Gemmatimonadaceae;g__SCN-70-22;s__SCN-70-22 sp016719105	53	4	1.24e-13
100580287	SRR17509979|k141_40329_flag=1_multi=17.0000_len=1013	Pisuviricota	d__Bacteria;p__Gemmatimonadota;c__Gemmatimonadetes;o__Gemmatimonadales;f__Gemmatimonadaceae;g__SCN-70-22;s__SCN-70-22 sp016719105	28	0	2.09e-06
100580287	SRR17497068|k141_144847_flag=1_multi=37.7881_len=1816	Pisuviricota	d__Bacteria;p__Gemmatimonadota;c__Gemmatimonadetes;o__Gemmatimonadales;f__Gemmatimonadaceae;g__SCN-70-22;s__SCN-70-22 sp016719105	53	4	1.24e-13
100580287	SRR17481242|k141_14860_flag=1_multi=140.0000_len=3974	Unclassified	d__Bacteria;p__Gemmatimonadota;c__Gemmatimonadetes;o__Gemmatimonadales;f__Gemmatimonadaceae;g__SCN-70-22;s__SCN-70-22 sp016719105	53	4	1.24e-13
100580287	SRR17509979|k141_11840_flag=1_multi=73.0000_len=1384	Pisuviricota	d__Bacteria;p__Gemmatimonadota;c__Gemmatimonadetes;o__Gemmatimonadales;f__Gemmatimonadaceae;g__SCN-70-22;s__SCN-70-22 sp016719105	32	1	9.72e-05
100580287	SRR17509979|k141_54497_flag=1_multi=434.0000_len=1853	Pisuviricota	d__Bacteria;p__Gemmatimonadota;c__Gemmatimonadetes;o__Gemmatimonadales;f__Gemmatimonadaceae;g__SCN-70-22;s__SCN-70-22 sp016719105	53	4	1.24e-13
100580287	SRR17509979|k141_62709_flag=1_multi=44.0000_len=2751	Pisuviricota	d__Bacteria;p__Gemmatimonadota;c__Gemmatimonadetes;o__Gemmatimonadales;f__Gemmatimonadaceae;g__SCN-70-22;s__SCN-70-22 sp016719105	42	1	1.25e-08
100581832	SRR8549914|k141_1875_flag=1_multi=10.0000_len=2535	Pisuviricota	d__Bacteria;p__Cyanobacteria;c__Cyanobacteriia;o__Cyanobacteriales;f__Cyanobacteriaceae;g__Cyanobacterium;s__Cyanobacterium sp015272165	29	0	5.43e-05
100591441	SRR11829261|k141_152797_flag=1_multi=151.2792_len=2526	Kitrinoviricota	d__Bacteria;p__Firmicutes_A;c__Clostridia;o__Peptostreptococcales;f__Peptostreptococcaceae;g__Clostridioides;s__Clostridioides difficile	25	0	4.29e-05
100596534	SRR11829261|k141_152797_flag=1_multi=151.2792_len=2526	Kitrinoviricota	d__Bacteria;p__Firmicutes_A;c__Clostridia;o__Peptostreptococcales;f__Peptostreptococcaceae;g__Clostridioides;s__Clostridioides difficile	25	0	4.29e-05
100600050	SRR11648413|k141_155839_flag=0_multi=32.5524_len=1714	Lenarviricota	d__Bacteria;p__Proteobacteria;c__Gammaproteobacteria;o__Enterobacterales;f__Enterobacteriaceae;g__Salmonella;s__Salmonella enterica	23	0	0.000333
100600073	SRR11648413|k141_155839_flag=0_multi=32.5524_len=1714	Lenarviricota	d__Bacteria;p__Proteobacteria;c__Gammaproteobacteria;o__Enterobacterales;f__Enterobacteriaceae;g__Salmonella;s__Salmonella enterica	23	0	0.000333
100627710	SRR11829101|k141_170810_flag=1_multi=15.0000_len=5608	Kitrinoviricota	d__Bacteria;p__Firmicutes_A;c__Clostridia;o__Peptostreptococcales;f__Peptostreptococcaceae;g__Clostridioides;s__Clostridioides difficile	30	0	1.11e-05
100628969	SRR11828459|k141_18049_flag=1_multi=4.0000_len=1029	Duplornaviricota	d__Bacteria;p__Firmicutes_A;c__Clostridia;o__Peptostreptococcales;f__Peptostreptococcaceae;g__Clostridioides;s__Clostridioides difficile	29	1	1.11e-05
100632402	SRR11828459|k141_18049_flag=1_multi=4.0000_len=1029	Duplornaviricota	d__Bacteria;p__Firmicutes_A;c__Clostridia;o__Peptostreptococcales;f__Peptostreptococcaceae;g__Clostridioides;s__Clostridioides difficile	29	1	1.11e-05
100633868	SRR10849744|k141_269660_flag=1_multi=11.0000_len=3570	Lenarviricota	d__Bacteria;p__Firmicutes;c__Bacilli;o__Bacillales_B;f__DSM-18226;g__Robertmurraya;s__Robertmurraya massiliosenegalensis	23	0	0.000444
100645394	SRR11829261|k141_152797_flag=1_multi=151.2792_len=2526	Kitrinoviricota	d__Bacteria;p__Firmicutes_A;c__Clostridia;o__Peptostreptococcales;f__Peptostreptococcaceae;g__Clostridioides;s__Clostridioides difficile	25	0	4.29e-05
100647067	SRR11829144|k141_41746_flag=1_multi=10.0000_len=6681	Pisuviricota	d__Bacteria;p__Proteobacteria;c__Gammaproteobacteria;o__Enterobacterales;f__Enterobacteriaceae;g__Salmonella;s__Salmonella enterica	25	0	2.57e-05
100650503	SRR11829261|k141_152797_flag=1_multi=151.2792_len=2526	Kitrinoviricota	d__Bacteria;p__Firmicutes_A;c__Clostridia;o__Peptostreptococcales;f__Peptostreptococcaceae;g__Clostridioides;s__Clostridioides difficile	25	0	4.29e-05
100658335	SRR7537488|k141_466650_flag=1_multi=7.0000_len=3382	Kitrinoviricota	d__Bacteria;p__Poribacteria;c__WGA-4E;o__WGA-4E;f__WGA-3G;g__MSPOR6;s__MSPOR6 sp003635315	31	1	0.000144
100658335	SRR7535022|k141_91608_flag=1_multi=9.0000_len=5495	Kitrinoviricota	d__Bacteria;p__Poribacteria;c__WGA-4E;o__WGA-4E;f__WGA-3G;g__MSPOR6;s__MSPOR6 sp003635315	32	1	2.39e-07
100663178	SRR11827439|k141_109350_flag=1_multi=4.0000_len=2497	Duplornaviricota	d__Bacteria;p__Firmicutes_A;c__Clostridia;o__Peptostreptococcales;f__Peptostreptococcaceae;g__Clostridioides;s__Clostridioides difficile	26	1	0.000481
100666856	SRR11829101|k141_170810_flag=1_multi=15.0000_len=5608	Kitrinoviricota	d__Bacteria;p__Firmicutes_A;c__Clostridia;o__Peptostreptococcales;f__Peptostreptococcaceae;g__Clostridioides;s__Clostridioides difficile	30	0	1.11e-05
100671139	SRR11829001|k141_10445_flag=1_multi=5.0000_len=2485	Lenarviricota	d__Bacteria;p__Proteobacteria;c__Gammaproteobacteria;o__Enterobacterales;f__Vibrionaceae;g__Vibrio;s__Vibrio cholerae	27	0	0.000333
100671739	SRR12685024|k141_131206_flag=1_multi=12.0000_len=3956	Pisuviricota	d__Bacteria;p__Myxococcota;c__Polyangia;o__Polyangiales;f__Polyangiaceae;g__JAAFHV01;s__JAAFHV01 sp016720545	23	0	0.00037
100671739	SRR14530880|k119_2620_flag=1_multi=62.0000_len=4380	Kitrinoviricota	d__Bacteria;p__Myxococcota;c__Polyangia;o__Polyangiales;f__Polyangiaceae;g__JAAFHV01;s__JAAFHV01 sp016720545	31	1	6.15e-07
100671741	SRR17497092|k141_33398_flag=1_multi=217.0121_len=1878	Pisuviricota	d__Bacteria;p__Myxococcota;c__Polyangia;o__Polyangiales;f__Polyangiaceae;g__JAAFHV01;s__JAAFHV01 sp016720545	30	1	4.42e-06
100671741	SRR10849744|k141_310535_flag=1_multi=101.0000_len=3955	Lenarviricota	d__Bacteria;p__Myxococcota;c__Polyangia;o__Polyangiales;f__Polyangiaceae;g__JAAFHV01;s__JAAFHV01 sp016720545	30	0	9.5e-08
100671741	SRR14530880|k119_2620_flag=1_multi=62.0000_len=4380	Kitrinoviricota	d__Bacteria;p__Myxococcota;c__Polyangia;o__Polyangiales;f__Polyangiaceae;g__JAAFHV01;s__JAAFHV01 sp016720545	32	1	3.42e-07
100671741	SRR17509979|k141_53443_flag=1_multi=169.8080_len=4630	Kitrinoviricota	d__Bacteria;p__Myxococcota;c__Polyangia;o__Polyangiales;f__Polyangiaceae;g__JAAFHV01;s__JAAFHV01 sp016720545	30	1	4.42e-06
100671741	SRR11450585|k141_260925_flag=1_multi=20.0000_len=6420	Unclassified	d__Bacteria;p__Myxococcota;c__Polyangia;o__Polyangiales;f__Polyangiaceae;g__JAAFHV01;s__JAAFHV01 sp016720545	28	0	0.000206
100671741	BC-0345298860|k141_3179	Lenarviricota	d__Bacteria;p__Myxococcota;c__Polyangia;o__Polyangiales;f__Polyangiaceae;g__JAAFHV01;s__JAAFHV01 sp016720545	27	0	4.42e-06
100671741	SRR11648176|k141_298601_flag=1_multi=36.0000_len=3120	Kitrinoviricota	d__Bacteria;p__Myxococcota;c__Polyangia;o__Polyangiales;f__Polyangiaceae;g__JAAFHV01;s__JAAFHV01 sp016720545	29	0	3.42e-07
100671741	SRR17509978|k141_113185_flag=1_multi=9.0000_len=1199	Pisuviricota	d__Bacteria;p__Myxococcota;c__Polyangia;o__Polyangiales;f__Polyangiaceae;g__JAAFHV01;s__JAAFHV01 sp016720545	25	0	5.72e-05
100671741	SRR17509979|k141_54497_flag=1_multi=434.0000_len=1853	Pisuviricota	d__Bacteria;p__Myxococcota;c__Polyangia;o__Polyangiales;f__Polyangiaceae;g__JAAFHV01;s__JAAFHV01 sp016720545	30	1	4.42e-06
100671741	SRR10849374|k141_218357_flag=1_multi=12.0000_len=3750	Lenarviricota	d__Bacteria;p__Myxococcota;c__Polyangia;o__Polyangiales;f__Polyangiaceae;g__JAAFHV01;s__JAAFHV01 sp016720545	27	0	4.42e-06
100671741	SRR17497064|k141_135790_flag=1_multi=52.0000_len=1739	Pisuviricota	d__Bacteria;p__Myxococcota;c__Polyangia;o__Polyangiales;f__Polyangiaceae;g__JAAFHV01;s__JAAFHV01 sp016720545	30	1	4.42e-06
100671741	SRR11829331|k141_332492_flag=1_multi=252.0000_len=4351	Lenarviricota	d__Bacteria;p__Myxococcota;c__Polyangia;o__Polyangiales;f__Polyangiaceae;g__JAAFHV01;s__JAAFHV01 sp016720545	30	1	4.42e-06
100671741	SRR5829964|k141_20917_flag=1_multi=123.0000_len=1791	Kitrinoviricota	d__Bacteria;p__Myxococcota;c__Polyangia;o__Polyangiales;f__Polyangiaceae;g__JAAFHV01;s__JAAFHV01 sp016720545	27	1	0.000206
100671741	BC-0332570062|k141_61782	Lenarviricota	d__Bacteria;p__Myxococcota;c__Polyangia;o__Polyangiales;f__Polyangiaceae;g__JAAFHV01;s__JAAFHV01 sp016720545	27	0	4.42e-06
100671741	SRR17509979|k141_16339_flag=1_multi=584.0000_len=1694	Pisuviricota	d__Bacteria;p__Myxococcota;c__Polyangia;o__Polyangiales;f__Polyangiaceae;g__JAAFHV01;s__JAAFHV01 sp016720545	26	1	0.00074
100671741	SRR17497068|k141_144847_flag=1_multi=37.7881_len=1816	Pisuviricota	d__Bacteria;p__Myxococcota;c__Polyangia;o__Polyangiales;f__Polyangiaceae;g__JAAFHV01;s__JAAFHV01 sp016720545	27	0	4.42e-06
100671741	SRR11565437|k141_190787_flag=1_multi=8.0000_len=2964	Kitrinoviricota	d__Bacteria;p__Myxococcota;c__Polyangia;o__Polyangiales;f__Polyangiaceae;g__JAAFHV01;s__JAAFHV01 sp016720545	27	0	4.42e-06
100671741	SRR17509976|k141_164083_flag=1_multi=58.0000_len=4337	Pisuviricota	d__Bacteria;p__Myxococcota;c__Polyangia;o__Polyangiales;f__Polyangiaceae;g__JAAFHV01;s__JAAFHV01 sp016720545	27	0	4.42e-06
100671741	SRR18771403|k141_131354_flag=1_multi=48.8407_len=10690	Pisuviricota	d__Bacteria;p__Myxococcota;c__Polyangia;o__Polyangiales;f__Polyangiaceae;g__JAAFHV01;s__JAAFHV01 sp016720545	27	0	4.42e-06
100671741	SRR17497126|k141_132965_flag=1_multi=75.0000_len=1737	Pisuviricota	d__Bacteria;p__Myxococcota;c__Polyangia;o__Polyangiales;f__Polyangiaceae;g__JAAFHV01;s__JAAFHV01 sp016720545	23	0	0.00074
100671741	SRR18770931|k141_53716_flag=1_multi=6.0000_len=1000	Lenarviricota	d__Bacteria;p__Myxococcota;c__Polyangia;o__Polyangiales;f__Polyangiaceae;g__JAAFHV01;s__JAAFHV01 sp016720545	25	0	5.72e-05
100671741	SRR17481242|k141_14860_flag=1_multi=140.0000_len=3974	Unclassified	d__Bacteria;p__Myxococcota;c__Polyangia;o__Polyangiales;f__Polyangiaceae;g__JAAFHV01;s__JAAFHV01 sp016720545	30	1	4.42e-06
100671741	SRR17497126|k141_68629_flag=1_multi=6.0000_len=1048	Pisuviricota	d__Bacteria;p__Myxococcota;c__Polyangia;o__Polyangiales;f__Polyangiaceae;g__JAAFHV01;s__JAAFHV01 sp016720545	24	0	0.000206
100671741	SRR17509940|k141_117101_flag=1_multi=38.0000_len=2457	Duplornaviricota	d__Bacteria;p__Myxococcota;c__Polyangia;o__Polyangiales;f__Polyangiaceae;g__JAAFHV01;s__JAAFHV01 sp016720545	27	0	4.42e-06
100671741	SRR17509977|k141_137261_flag=1_multi=15.0000_len=2450	Kitrinoviricota	d__Bacteria;p__Myxococcota;c__Polyangia;o__Polyangiales;f__Polyangiaceae;g__JAAFHV01;s__JAAFHV01 sp016720545	25	0	5.72e-05
100671741	SRR17481244|k141_92016_flag=1_multi=44.0000_len=3519	Lenarviricota	d__Bacteria;p__Myxococcota;c__Polyangia;o__Polyangiales;f__Polyangiaceae;g__JAAFHV01;s__JAAFHV01 sp016720545	27	0	4.42e-06
100671741	SRR17497049|k141_87067_flag=1_multi=464.0000_len=3624	Lenarviricota	d__Bacteria;p__Myxococcota;c__Polyangia;o__Polyangiales;f__Polyangiaceae;g__JAAFHV01;s__JAAFHV01 sp016720545	24	0	0.000206
100671741	SRR17497126|k141_95757_flag=1_multi=826.0000_len=3116	Lenarviricota	d__Bacteria;p__Myxococcota;c__Polyangia;o__Polyangiales;f__Polyangiaceae;g__JAAFHV01;s__JAAFHV01 sp016720545	28	0	0.000206
100671741	SRR17509979|k141_52575_flag=1_multi=83.6741_len=1804	Pisuviricota	d__Bacteria;p__Myxococcota;c__Polyangia;o__Polyangiales;f__Polyangiaceae;g__JAAFHV01;s__JAAFHV01 sp016720545	30	1	4.42e-06
100671741	SRR17509967|k141_44924_flag=1_multi=7.0000_len=2320	Pisuviricota	d__Bacteria;p__Myxococcota;c__Polyangia;o__Polyangiales;f__Polyangiaceae;g__JAAFHV01;s__JAAFHV01 sp016720545	26	0	1.59e-05
100671741	SRR17509979|k141_28799_flag=1_multi=182.0000_len=1917	Pisuviricota	d__Bacteria;p__Myxococcota;c__Polyangia;o__Polyangiales;f__Polyangiaceae;g__JAAFHV01;s__JAAFHV01 sp016720545	27	0	4.42e-06
100671741	SRR17509977|k141_156580_flag=1_multi=3.0000_len=1406	Pisuviricota	d__Bacteria;p__Myxococcota;c__Polyangia;o__Polyangiales;f__Polyangiaceae;g__JAAFHV01;s__JAAFHV01 sp016720545	28	0	0.000206
100671741	SRR17497054|k141_191824_flag=1_multi=13.0000_len=2259	Pisuviricota	d__Bacteria;p__Myxococcota;c__Polyangia;o__Polyangiales;f__Polyangiaceae;g__JAAFHV01;s__JAAFHV01 sp016720545	27	0	4.42e-06
100671741	SRR17497099|k141_59590_flag=1_multi=17.5683_len=1158	Pisuviricota	d__Bacteria;p__Myxococcota;c__Polyangia;o__Polyangiales;f__Polyangiaceae;g__JAAFHV01;s__JAAFHV01 sp016720545	25	0	5.72e-05
100671741	SRR17497098|k141_13697_flag=1_multi=34.0000_len=1851	Pisuviricota	d__Bacteria;p__Myxococcota;c__Polyangia;o__Polyangiales;f__Polyangiaceae;g__JAAFHV01;s__JAAFHV01 sp016720545	30	1	4.42e-06
100671741	SRR11828805|k141_11533_flag=1_multi=89.8329_len=3648	Kitrinoviricota	d__Bacteria;p__Myxococcota;c__Polyangia;o__Polyangiales;f__Polyangiaceae;g__JAAFHV01;s__JAAFHV01 sp016720545	27	0	4.42e-06
100671741	SRR17509978|k141_111246_flag=1_multi=25.3407_len=1855	Pisuviricota	d__Bacteria;p__Myxococcota;c__Polyangia;o__Polyangiales;f__Polyangiaceae;g__JAAFHV01;s__JAAFHV01 sp016720545	30	1	4.42e-06
100671741	SRR12685024|k141_131206_flag=1_multi=12.0000_len=3956	Pisuviricota	d__Bacteria;p__Myxococcota;c__Polyangia;o__Polyangiales;f__Polyangiaceae;g__JAAFHV01;s__JAAFHV01 sp016720545	26	1	0.00074
100671741	SRR11648360|k141_236875_flag=1_multi=13.0000_len=4864	urv.p.001	d__Bacteria;p__Myxococcota;c__Polyangia;o__Polyangiales;f__Polyangiaceae;g__JAAFHV01;s__JAAFHV01 sp016720545	29	0	3.42e-07
100671741	SRR17509979|k141_48627_flag=1_multi=74.6250_len=1645	Pisuviricota	d__Bacteria;p__Myxococcota;c__Polyangia;o__Polyangiales;f__Polyangiaceae;g__JAAFHV01;s__JAAFHV01 sp016720545	26	1	0.00074
100671741	SRR17481245|k141_34522_flag=1_multi=17.0000_len=1572	Pisuviricota	d__Bacteria;p__Myxococcota;c__Polyangia;o__Polyangiales;f__Polyangiaceae;g__JAAFHV01;s__JAAFHV01 sp016720545	26	1	0.00074
100671741	SRR17497064|k141_128537_flag=1_multi=9.0000_len=1004	Pisuviricota	d__Bacteria;p__Myxococcota;c__Polyangia;o__Polyangiales;f__Polyangiaceae;g__JAAFHV01;s__JAAFHV01 sp016720545	31	1	0.000206
100671741	SRR17481244|k141_53629_flag=1_multi=27.0000_len=3662	Lenarviricota	d__Bacteria;p__Myxococcota;c__Polyangia;o__Polyangiales;f__Polyangiaceae;g__JAAFHV01;s__JAAFHV01 sp016720545	28	1	5.72e-05
100671741	SRR17509979|k141_40329_flag=1_multi=17.0000_len=1013	Pisuviricota	d__Bacteria;p__Myxococcota;c__Polyangia;o__Polyangiales;f__Polyangiaceae;g__JAAFHV01;s__JAAFHV01 sp016720545	28	0	0.000206
100671741	SRR17509977|k141_51278_flag=1_multi=666.0000_len=6190	Pisuviricota	d__Bacteria;p__Myxococcota;c__Polyangia;o__Polyangiales;f__Polyangiaceae;g__JAAFHV01;s__JAAFHV01 sp016720545	27	0	4.42e-06
100671741	SRR17497069|k141_154292_flag=1_multi=166.0000_len=1714	Pisuviricota	d__Bacteria;p__Myxococcota;c__Polyangia;o__Polyangiales;f__Polyangiaceae;g__JAAFHV01;s__JAAFHV01 sp016720545	31	1	0.000206
100671741	SRR17509979|k141_11840_flag=1_multi=73.0000_len=1384	Pisuviricota	d__Bacteria;p__Myxococcota;c__Polyangia;o__Polyangiales;f__Polyangiaceae;g__JAAFHV01;s__JAAFHV01 sp016720545	26	1	0.00074
100671741	SRR17509979|k141_62709_flag=1_multi=44.0000_len=2751	Pisuviricota	d__Bacteria;p__Myxococcota;c__Polyangia;o__Polyangiales;f__Polyangiaceae;g__JAAFHV01;s__JAAFHV01 sp016720545	27	0	4.42e-06
100671741	SRR11450579|k141_22903_flag=1_multi=93.0000_len=8250	Pisuviricota	d__Bacteria;p__Myxococcota;c__Polyangia;o__Polyangiales;f__Polyangiaceae;g__JAAFHV01;s__JAAFHV01 sp016720545	27	0	4.42e-06
100671741	SRR17509976|k141_100049_flag=1_multi=72.0000_len=1862	Pisuviricota	d__Bacteria;p__Myxococcota;c__Polyangia;o__Polyangiales;f__Polyangiaceae;g__JAAFHV01;s__JAAFHV01 sp016720545	27	1	0.000206
100671741	SRR17509940|k141_147462_flag=1_multi=29.0000_len=3674	Unclassified	d__Bacteria;p__Myxococcota;c__Polyangia;o__Polyangiales;f__Polyangiaceae;g__JAAFHV01;s__JAAFHV01 sp016720545	28	1	5.72e-05
100671747	SRR17497049|k141_87067_flag=1_multi=464.0000_len=3624	Lenarviricota	d__Bacteria;p__Myxococcota;c__Polyangia;o__Polyangiales;f__Polyangiaceae;g__JAAFHV01;s__JAAFHV01 sp016720545	50	7	1.62e-06
100671747	SRR17509979|k141_62709_flag=1_multi=44.0000_len=2751	Pisuviricota	d__Bacteria;p__Myxococcota;c__Polyangia;o__Polyangiales;f__Polyangiaceae;g__JAAFHV01;s__JAAFHV01 sp016720545	40	1	5.79e-11
100671747	SRR17497126|k141_68629_flag=1_multi=6.0000_len=1048	Pisuviricota	d__Bacteria;p__Myxococcota;c__Polyangia;o__Polyangiales;f__Polyangiaceae;g__JAAFHV01;s__JAAFHV01 sp016720545	24	0	0.001
100671747	SRR17497092|k141_33398_flag=1_multi=217.0121_len=1878	Pisuviricota	d__Bacteria;p__Myxococcota;c__Polyangia;o__Polyangiales;f__Polyangiaceae;g__JAAFHV01;s__JAAFHV01 sp016720545	60	0	7.39e-20
100671747	SRR11648176|k141_298601_flag=1_multi=36.0000_len=3120	Kitrinoviricota	d__Bacteria;p__Myxococcota;c__Polyangia;o__Polyangiales;f__Polyangiaceae;g__JAAFHV01;s__JAAFHV01 sp016720545	64	1	2.05e-20
100671747	SRR11450579|k141_22903_flag=1_multi=93.0000_len=8250	Pisuviricota	d__Bacteria;p__Myxococcota;c__Polyangia;o__Polyangiales;f__Polyangiaceae;g__JAAFHV01;s__JAAFHV01 sp016720545	27	0	2.1e-05
100671747	SRR17509940|k141_117101_flag=1_multi=38.0000_len=2457	Duplornaviricota	d__Bacteria;p__Myxococcota;c__Polyangia;o__Polyangiales;f__Polyangiaceae;g__JAAFHV01;s__JAAFHV01 sp016720545	31	1	5.84e-06
100671747	SRR17509979|k141_54497_flag=1_multi=434.0000_len=1853	Pisuviricota	d__Bacteria;p__Myxococcota;c__Polyangia;o__Polyangiales;f__Polyangiaceae;g__JAAFHV01;s__JAAFHV01 sp016720545	63	0	1.59e-21
100671747	SRR17509979|k141_11840_flag=1_multi=73.0000_len=1384	Pisuviricota	d__Bacteria;p__Myxococcota;c__Polyangia;o__Polyangiales;f__Polyangiaceae;g__JAAFHV01;s__JAAFHV01 sp016720545	32	2	7.55e-05
100671747	SRR14530880|k119_2620_flag=1_multi=62.0000_len=4380	Kitrinoviricota	d__Bacteria;p__Myxococcota;c__Polyangia;o__Polyangiales;f__Polyangiaceae;g__JAAFHV01;s__JAAFHV01 sp016720545	47	3	1.61e-11
100671747	SRR11648360|k141_236875_flag=1_multi=13.0000_len=4864	urv.p.001	d__Bacteria;p__Myxococcota;c__Polyangia;o__Polyangiales;f__Polyangiaceae;g__JAAFHV01;s__JAAFHV01 sp016720545	29	0	1.62e-06
100671747	BC-0332570062|k141_61782	Lenarviricota	d__Bacteria;p__Myxococcota;c__Polyangia;o__Polyangiales;f__Polyangiaceae;g__JAAFHV01;s__JAAFHV01 sp016720545	33	0	9.7e-09
100671747	SRR10849744|k141_310535_flag=1_multi=101.0000_len=3955	Lenarviricota	d__Bacteria;p__Myxococcota;c__Polyangia;o__Polyangiales;f__Polyangiaceae;g__JAAFHV01;s__JAAFHV01 sp016720545	39	0	4.48e-12
100671747	SRR17509976|k141_164083_flag=1_multi=58.0000_len=4337	Pisuviricota	d__Bacteria;p__Myxococcota;c__Polyangia;o__Polyangiales;f__Polyangiaceae;g__JAAFHV01;s__JAAFHV01 sp016720545	34	2	5.84e-06
100671747	SRR17509979|k141_40329_flag=1_multi=17.0000_len=1013	Pisuviricota	d__Bacteria;p__Myxococcota;c__Polyangia;o__Polyangiales;f__Polyangiaceae;g__JAAFHV01;s__JAAFHV01 sp016720545	29	0	1.62e-06
100671747	SRR17497068|k141_144847_flag=1_multi=37.7881_len=1816	Pisuviricota	d__Bacteria;p__Myxococcota;c__Polyangia;o__Polyangiales;f__Polyangiaceae;g__JAAFHV01;s__JAAFHV01 sp016720545	81	0	1.57e-31
100671747	SRR10849374|k141_218357_flag=1_multi=12.0000_len=3750	Lenarviricota	d__Bacteria;p__Myxococcota;c__Polyangia;o__Polyangiales;f__Polyangiaceae;g__JAAFHV01;s__JAAFHV01 sp016720545	37	1	2.7e-09
100671747	SRR17509977|k141_156580_flag=1_multi=3.0000_len=1406	Pisuviricota	d__Bacteria;p__Myxococcota;c__Polyangia;o__Polyangiales;f__Polyangiaceae;g__JAAFHV01;s__JAAFHV01 sp016720545	37	1	4.51e-07
100671747	SRR18771403|k141_131354_flag=1_multi=48.8407_len=10690	Pisuviricota	d__Bacteria;p__Myxococcota;c__Polyangia;o__Polyangiales;f__Polyangiaceae;g__JAAFHV01;s__JAAFHV01 sp016720545	62	0	5.71e-21
100671747	SRR17481244|k141_92016_flag=1_multi=44.0000_len=3519	Lenarviricota	d__Bacteria;p__Myxococcota;c__Polyangia;o__Polyangiales;f__Polyangiaceae;g__JAAFHV01;s__JAAFHV01 sp016720545	34	0	2.7e-09
100671747	SRR17497064|k141_128537_flag=1_multi=9.0000_len=1004	Pisuviricota	d__Bacteria;p__Myxococcota;c__Polyangia;o__Polyangiales;f__Polyangiaceae;g__JAAFHV01;s__JAAFHV01 sp016720545	31	1	5.84e-06
100671747	SRR17509979|k141_53443_flag=1_multi=169.8080_len=4630	Kitrinoviricota	d__Bacteria;p__Myxococcota;c__Polyangia;o__Polyangiales;f__Polyangiaceae;g__JAAFHV01;s__JAAFHV01 sp016720545	71	0	5.67e-26
100671747	SRR17509979|k141_28799_flag=1_multi=182.0000_len=1917	Pisuviricota	d__Bacteria;p__Myxococcota;c__Polyangia;o__Polyangiales;f__Polyangiaceae;g__JAAFHV01;s__JAAFHV01 sp016720545	50	0	5.75e-16
100671747	SRR17509978|k141_111246_flag=1_multi=25.3407_len=1855	Pisuviricota	d__Bacteria;p__Myxococcota;c__Polyangia;o__Polyangiales;f__Polyangiaceae;g__JAAFHV01;s__JAAFHV01 sp016720545	51	2	3.46e-13
100671747	SRR11828805|k141_11533_flag=1_multi=89.8329_len=3648	Kitrinoviricota	d__Bacteria;p__Myxococcota;c__Polyangia;o__Polyangiales;f__Polyangiaceae;g__JAAFHV01;s__JAAFHV01 sp016720545	42	1	4.48e-12
100671747	BC-0345298860|k141_3179	Lenarviricota	d__Bacteria;p__Myxococcota;c__Polyangia;o__Polyangiales;f__Polyangiaceae;g__JAAFHV01;s__JAAFHV01 sp016720545	94	1	7.24e-35
100671747	SRR17481242|k141_14860_flag=1_multi=140.0000_len=3974	Unclassified	d__Bacteria;p__Myxococcota;c__Polyangia;o__Polyangiales;f__Polyangiaceae;g__JAAFHV01;s__JAAFHV01 sp016720545	67	0	9.49e-24
100671747	SRR17497069|k141_154292_flag=1_multi=166.0000_len=1714	Pisuviricota	d__Bacteria;p__Myxococcota;c__Polyangia;o__Polyangiales;f__Polyangiaceae;g__JAAFHV01;s__JAAFHV01 sp016720545	43	2	4.51e-07
100671747	SRR5829964|k141_20917_flag=1_multi=123.0000_len=1791	Kitrinoviricota	d__Bacteria;p__Myxococcota;c__Polyangia;o__Polyangiales;f__Polyangiaceae;g__JAAFHV01;s__JAAFHV01 sp016720545	31	2	0.000272
100671747	SRR17509978|k141_113185_flag=1_multi=9.0000_len=1199	Pisuviricota	d__Bacteria;p__Myxococcota;c__Polyangia;o__Polyangiales;f__Polyangiaceae;g__JAAFHV01;s__JAAFHV01 sp016720545	39	4	2.1e-05
100671747	SRR11829331|k141_332492_flag=1_multi=252.0000_len=4351	Lenarviricota	d__Bacteria;p__Myxococcota;c__Polyangia;o__Polyangiales;f__Polyangiaceae;g__JAAFHV01;s__JAAFHV01 sp016720545	84	0	3.37e-33
100671747	SRR17509967|k141_44924_flag=1_multi=7.0000_len=2320	Pisuviricota	d__Bacteria;p__Myxococcota;c__Polyangia;o__Polyangiales;f__Polyangiaceae;g__JAAFHV01;s__JAAFHV01 sp016720545	39	3	4.51e-07
100671747	SRR17509979|k141_52575_flag=1_multi=83.6741_len=1804	Pisuviricota	d__Bacteria;p__Myxococcota;c__Polyangia;o__Polyangiales;f__Polyangiaceae;g__JAAFHV01;s__JAAFHV01 sp016720545	72	5	3.44e-18
100671747	SRR17497064|k141_135790_flag=1_multi=52.0000_len=1739	Pisuviricota	d__Bacteria;p__Myxococcota;c__Polyangia;o__Polyangiales;f__Polyangiaceae;g__JAAFHV01;s__JAAFHV01 sp016720545	54	0	1.6e-16
100671747	SRR17509977|k141_51278_flag=1_multi=666.0000_len=6190	Pisuviricota	d__Bacteria;p__Myxococcota;c__Polyangia;o__Polyangiales;f__Polyangiaceae;g__JAAFHV01;s__JAAFHV01 sp016720545	42	3	9.7e-09
100671747	SRR17509977|k141_137261_flag=1_multi=15.0000_len=2450	Kitrinoviricota	d__Bacteria;p__Myxococcota;c__Polyangia;o__Polyangiales;f__Polyangiaceae;g__JAAFHV01;s__JAAFHV01 sp016720545	34	2	5.84e-06
100671747	SRR18770931|k141_53716_flag=1_multi=6.0000_len=1000	Lenarviricota	d__Bacteria;p__Myxococcota;c__Polyangia;o__Polyangiales;f__Polyangiaceae;g__JAAFHV01;s__JAAFHV01 sp016720545	38	3	1.62e-06
100671747	SRR17481244|k141_53629_flag=1_multi=27.0000_len=3662	Lenarviricota	d__Bacteria;p__Myxococcota;c__Polyangia;o__Polyangiales;f__Polyangiaceae;g__JAAFHV01;s__JAAFHV01 sp016720545	46	3	5.79e-11
100671748	SRR17509977|k141_51278_flag=1_multi=666.0000_len=6190	Pisuviricota	d__Bacteria;p__Myxococcota;c__Polyangia;o__Polyangiales;f__Polyangiaceae;g__JAAFHV01;s__JAAFHV01 sp016720545	42	1	6.33e-06
100671748	SRR10849744|k141_310535_flag=1_multi=101.0000_len=3955	Lenarviricota	d__Bacteria;p__Myxococcota;c__Polyangia;o__Polyangiales;f__Polyangiaceae;g__JAAFHV01;s__JAAFHV01 sp016720545	37	1	2.28e-05
100671748	BC-0332570062|k141_61782	Lenarviricota	d__Bacteria;p__Myxococcota;c__Polyangia;o__Polyangiales;f__Polyangiaceae;g__JAAFHV01;s__JAAFHV01 sp016720545	35	1	0.000294
100671749	SRR17497063|k141_236251_flag=1_multi=918.6198_len=5775	Lenarviricota	d__Bacteria;p__Myxococcota;c__Polyangia;o__Polyangiales;f__Polyangiaceae;g__JAAFHV01;s__JAAFHV01 sp016720545	46	4	2.75e-07
100671749	SRR17509976|k141_164083_flag=1_multi=58.0000_len=4337	Pisuviricota	d__Bacteria;p__Myxococcota;c__Polyangia;o__Polyangiales;f__Polyangiaceae;g__JAAFHV01;s__JAAFHV01 sp016720545	27	0	1.28e-05
100671749	SRR11450579|k141_22903_flag=1_multi=93.0000_len=8250	Pisuviricota	d__Bacteria;p__Myxococcota;c__Polyangia;o__Polyangiales;f__Polyangiaceae;g__JAAFHV01;s__JAAFHV01 sp016720545	27	0	1.28e-05
100671749	SRR17481242|k141_14860_flag=1_multi=140.0000_len=3974	Unclassified	d__Bacteria;p__Myxococcota;c__Polyangia;o__Polyangiales;f__Polyangiaceae;g__JAAFHV01;s__JAAFHV01 sp016720545	68	0	2.7e-22
100671749	SRR11648360|k141_236875_flag=1_multi=13.0000_len=4864	urv.p.001	d__Bacteria;p__Myxococcota;c__Polyangia;o__Polyangiales;f__Polyangiaceae;g__JAAFHV01;s__JAAFHV01 sp016720545	30	0	2.75e-07
100671749	SRR17509940|k141_117101_flag=1_multi=38.0000_len=2457	Duplornaviricota	d__Bacteria;p__Myxococcota;c__Polyangia;o__Polyangiales;f__Polyangiaceae;g__JAAFHV01;s__JAAFHV01 sp016720545	31	1	3.56e-06
100671749	SRR17509979|k141_54497_flag=1_multi=434.0000_len=1853	Pisuviricota	d__Bacteria;p__Myxococcota;c__Polyangia;o__Polyangiales;f__Polyangiaceae;g__JAAFHV01;s__JAAFHV01 sp016720545	64	0	4.51e-20
100671749	SRR17509978|k141_113185_flag=1_multi=9.0000_len=1199	Pisuviricota	d__Bacteria;p__Myxococcota;c__Polyangia;o__Polyangiales;f__Polyangiaceae;g__JAAFHV01;s__JAAFHV01 sp016720545	33	0	4.61e-05
100671749	SRR18771403|k141_131354_flag=1_multi=48.8407_len=10690	Pisuviricota	d__Bacteria;p__Myxococcota;c__Polyangia;o__Polyangiales;f__Polyangiaceae;g__JAAFHV01;s__JAAFHV01 sp016720545	63	0	1.62e-19
100671749	SRR17481244|k141_53629_flag=1_multi=27.0000_len=3662	Lenarviricota	d__Bacteria;p__Myxococcota;c__Polyangia;o__Polyangiales;f__Polyangiaceae;g__JAAFHV01;s__JAAFHV01 sp016720545	41	1	7.66e-08
100671749	SRR17481244|k141_92016_flag=1_multi=44.0000_len=3519	Lenarviricota	d__Bacteria;p__Myxococcota;c__Polyangia;o__Polyangiales;f__Polyangiaceae;g__JAAFHV01;s__JAAFHV01 sp016720545	35	0	7.66e-08
100671749	SRR17509978|k141_111246_flag=1_multi=25.3407_len=1855	Pisuviricota	d__Bacteria;p__Myxococcota;c__Polyangia;o__Polyangiales;f__Polyangiaceae;g__JAAFHV01;s__JAAFHV01 sp016720545	41	2	4.58e-10
100671749	SRR17509979|k141_62709_flag=1_multi=44.0000_len=2751	Pisuviricota	d__Bacteria;p__Myxococcota;c__Polyangia;o__Polyangiales;f__Polyangiaceae;g__JAAFHV01;s__JAAFHV01 sp016720545	42	1	2.13e-08
100671749	SRR17497092|k141_33398_flag=1_multi=217.0121_len=1878	Pisuviricota	d__Bacteria;p__Myxococcota;c__Polyangia;o__Polyangiales;f__Polyangiaceae;g__JAAFHV01;s__JAAFHV01 sp016720545	61	0	2.1e-18
100671749	SRR14530880|k119_2620_flag=1_multi=62.0000_len=4380	Kitrinoviricota	d__Bacteria;p__Myxococcota;c__Polyangia;o__Polyangiales;f__Polyangiaceae;g__JAAFHV01;s__JAAFHV01 sp016720545	47	1	7.6e-13
100671749	SRR17497126|k141_68629_flag=1_multi=6.0000_len=1048	Pisuviricota	d__Bacteria;p__Myxococcota;c__Polyangia;o__Polyangiales;f__Polyangiaceae;g__JAAFHV01;s__JAAFHV01 sp016720545	24	0	0.000596
100671749	SRR17509979|k141_11840_flag=1_multi=73.0000_len=1384	Pisuviricota	d__Bacteria;p__Myxococcota;c__Polyangia;o__Polyangiales;f__Polyangiaceae;g__JAAFHV01;s__JAAFHV01 sp016720545	32	1	0.000166
100671749	SRR17497054|k141_191824_flag=1_multi=13.0000_len=2259	Pisuviricota	d__Bacteria;p__Myxococcota;c__Polyangia;o__Polyangiales;f__Polyangiaceae;g__JAAFHV01;s__JAAFHV01 sp016720545	61	5	4.58e-10
100671749	SRR5829964|k141_20917_flag=1_multi=123.0000_len=1791	Kitrinoviricota	d__Bacteria;p__Myxococcota;c__Polyangia;o__Polyangiales;f__Polyangiaceae;g__JAAFHV01;s__JAAFHV01 sp016720545	31	1	0.000596
100671749	SRR17509967|k141_44924_flag=1_multi=7.0000_len=2320	Pisuviricota	d__Bacteria;p__Myxococcota;c__Polyangia;o__Polyangiales;f__Polyangiaceae;g__JAAFHV01;s__JAAFHV01 sp016720545	30	1	1.28e-05
100671749	SRR17497098|k141_13697_flag=1_multi=34.0000_len=1851	Pisuviricota	d__Bacteria;p__Myxococcota;c__Polyangia;o__Polyangiales;f__Polyangiaceae;g__JAAFHV01;s__JAAFHV01 sp016720545	69	6	4.54e-15
100671749	SRR10849374|k141_218357_flag=1_multi=12.0000_len=3750	Lenarviricota	d__Bacteria;p__Myxococcota;c__Polyangia;o__Polyangiales;f__Polyangiaceae;g__JAAFHV01;s__JAAFHV01 sp016720545	35	0	7.66e-08
100671749	BC-0332570062|k141_61782	Lenarviricota	d__Bacteria;p__Myxococcota;c__Polyangia;o__Polyangiales;f__Polyangiaceae;g__JAAFHV01;s__JAAFHV01 sp016720545	31	0	7.66e-08
100671749	SRR17497064|k141_128537_flag=1_multi=9.0000_len=1004	Pisuviricota	d__Bacteria;p__Myxococcota;c__Polyangia;o__Polyangiales;f__Polyangiaceae;g__JAAFHV01;s__JAAFHV01 sp016720545	31	1	3.56e-06
100671749	SRR11828805|k141_11533_flag=1_multi=89.8329_len=3648	Kitrinoviricota	d__Bacteria;p__Myxococcota;c__Polyangia;o__Polyangiales;f__Polyangiaceae;g__JAAFHV01;s__JAAFHV01 sp016720545	45	1	4.58e-10
100671749	SRR18770931|k141_53716_flag=1_multi=6.0000_len=1000	Lenarviricota	d__Bacteria;p__Myxococcota;c__Polyangia;o__Polyangiales;f__Polyangiaceae;g__JAAFHV01;s__JAAFHV01 sp016720545	38	4	4.61e-05
100671749	SRR17509979|k141_40329_flag=1_multi=17.0000_len=1013	Pisuviricota	d__Bacteria;p__Myxococcota;c__Polyangia;o__Polyangiales;f__Polyangiaceae;g__JAAFHV01;s__JAAFHV01 sp016720545	32	2	4.61e-05
100671749	SRR17497069|k141_154292_flag=1_multi=166.0000_len=1714	Pisuviricota	d__Bacteria;p__Myxococcota;c__Polyangia;o__Polyangiales;f__Polyangiaceae;g__JAAFHV01;s__JAAFHV01 sp016720545	31	0	1.28e-05
100671749	SRR17497126|k141_95757_flag=1_multi=826.0000_len=3116	Lenarviricota	d__Bacteria;p__Myxococcota;c__Polyangia;o__Polyangiales;f__Polyangiaceae;g__JAAFHV01;s__JAAFHV01 sp016720545	36	1	9.91e-07
100671749	SRR17509979|k141_28799_flag=1_multi=182.0000_len=1917	Pisuviricota	d__Bacteria;p__Myxococcota;c__Polyangia;o__Polyangiales;f__Polyangiaceae;g__JAAFHV01;s__JAAFHV01 sp016720545	52	0	2.11e-13
100671749	SRR11565437|k141_190787_flag=1_multi=8.0000_len=2964	Kitrinoviricota	d__Bacteria;p__Myxococcota;c__Polyangia;o__Polyangiales;f__Polyangiaceae;g__JAAFHV01;s__JAAFHV01 sp016720545	43	4	7.66e-08
100671749	SRR17509977|k141_51278_flag=1_multi=666.0000_len=6190	Pisuviricota	d__Bacteria;p__Myxococcota;c__Polyangia;o__Polyangiales;f__Polyangiaceae;g__JAAFHV01;s__JAAFHV01 sp016720545	37	1	2.75e-07
100671749	SRR17509979|k141_52575_flag=1_multi=83.6741_len=1804	Pisuviricota	d__Bacteria;p__Myxococcota;c__Polyangia;o__Polyangiales;f__Polyangiaceae;g__JAAFHV01;s__JAAFHV01 sp016720545	72	4	3.51e-16
100671749	SRR17509977|k141_156580_flag=1_multi=3.0000_len=1406	Pisuviricota	d__Bacteria;p__Myxococcota;c__Polyangia;o__Polyangiales;f__Polyangiaceae;g__JAAFHV01;s__JAAFHV01 sp016720545	38	1	3.56e-06
100671749	SRR10849744|k141_310535_flag=1_multi=101.0000_len=3955	Lenarviricota	d__Bacteria;p__Myxococcota;c__Polyangia;o__Polyangiales;f__Polyangiaceae;g__JAAFHV01;s__JAAFHV01 sp016720545	53	5	9.84e-12
100671749	SRR17497068|k141_144847_flag=1_multi=37.7881_len=1816	Pisuviricota	d__Bacteria;p__Myxococcota;c__Polyangia;o__Polyangiales;f__Polyangiaceae;g__JAAFHV01;s__JAAFHV01 sp016720545	82	3	4.48e-25
100671749	SRR17509977|k141_137261_flag=1_multi=15.0000_len=2450	Kitrinoviricota	d__Bacteria;p__Myxococcota;c__Polyangia;o__Polyangiales;f__Polyangiaceae;g__JAAFHV01;s__JAAFHV01 sp016720545	34	2	3.56e-06
100671749	SRR17509979|k141_53443_flag=1_multi=169.8080_len=4630	Kitrinoviricota	d__Bacteria;p__Myxococcota;c__Polyangia;o__Polyangiales;f__Polyangiaceae;g__JAAFHV01;s__JAAFHV01 sp016720545	70	2	5.8e-24
100671749	SRR11648176|k141_298601_flag=1_multi=36.0000_len=3120	Kitrinoviricota	d__Bacteria;p__Myxococcota;c__Polyangia;o__Polyangiales;f__Polyangiaceae;g__JAAFHV01;s__JAAFHV01 sp016720545	63	0	1.62e-19
100671749	BC-0345298860|k141_3179	Lenarviricota	d__Bacteria;p__Myxococcota;c__Polyangia;o__Polyangiales;f__Polyangiaceae;g__JAAFHV01;s__JAAFHV01 sp016720545	82	6	3.46e-26
100671749	SRR11829331|k141_332492_flag=1_multi=252.0000_len=4351	Lenarviricota	d__Bacteria;p__Myxococcota;c__Polyangia;o__Polyangiales;f__Polyangiaceae;g__JAAFHV01;s__JAAFHV01 sp016720545	82	6	3.46e-26
100671749	SRR17497049|k141_87067_flag=1_multi=464.0000_len=3624	Lenarviricota	d__Bacteria;p__Myxococcota;c__Polyangia;o__Polyangiales;f__Polyangiaceae;g__JAAFHV01;s__JAAFHV01 sp016720545	50	6	3.56e-06
100671749	SRR17497064|k141_135790_flag=1_multi=52.0000_len=1739	Pisuviricota	d__Bacteria;p__Myxococcota;c__Polyangia;o__Polyangiales;f__Polyangiaceae;g__JAAFHV01;s__JAAFHV01 sp016720545	55	0	4.54e-15
100671750	SRR17497064|k141_128537_flag=1_multi=9.0000_len=1004	Pisuviricota	d__Bacteria;p__Myxococcota;c__Polyangia;o__Polyangiales;f__Polyangiaceae;g__JAAFHV01;s__JAAFHV01 sp016720545	32	0	5.77e-06
100671750	SRR18771403|k141_131354_flag=1_multi=48.8407_len=10690	Pisuviricota	d__Bacteria;p__Myxococcota;c__Polyangia;o__Polyangiales;f__Polyangiaceae;g__JAAFHV01;s__JAAFHV01 sp016720545	63	0	2.63e-19
100671750	SRR17497126|k141_68629_flag=1_multi=6.0000_len=1048	Pisuviricota	d__Bacteria;p__Myxococcota;c__Polyangia;o__Polyangiales;f__Polyangiaceae;g__JAAFHV01;s__JAAFHV01 sp016720545	24	0	0.001
100671750	SRR11648360|k141_236875_flag=1_multi=13.0000_len=4864	urv.p.001	d__Bacteria;p__Myxococcota;c__Polyangia;o__Polyangiales;f__Polyangiaceae;g__JAAFHV01;s__JAAFHV01 sp016720545	29	0	1.61e-06
100671750	SRR11648176|k141_298601_flag=1_multi=36.0000_len=3120	Kitrinoviricota	d__Bacteria;p__Myxococcota;c__Polyangia;o__Polyangiales;f__Polyangiaceae;g__JAAFHV01;s__JAAFHV01 sp016720545	65	1	9.46e-19
100671750	SRR17509967|k141_44924_flag=1_multi=7.0000_len=2320	Pisuviricota	d__Bacteria;p__Myxococcota;c__Polyangia;o__Polyangiales;f__Polyangiaceae;g__JAAFHV01;s__JAAFHV01 sp016720545	39	2	1.61e-06
100671750	SRR17497099|k141_59590_flag=1_multi=17.5683_len=1158	Pisuviricota	d__Bacteria;p__Myxococcota;c__Polyangia;o__Polyangiales;f__Polyangiaceae;g__JAAFHV01;s__JAAFHV01 sp016720545	56	4	5.73e-11
100671750	SRR17481244|k141_92016_flag=1_multi=44.0000_len=3519	Lenarviricota	d__Bacteria;p__Myxococcota;c__Polyangia;o__Polyangiales;f__Polyangiaceae;g__JAAFHV01;s__JAAFHV01 sp016720545	34	0	2.67e-09
100671750	SRR10849374|k141_218357_flag=1_multi=12.0000_len=3750	Lenarviricota	d__Bacteria;p__Myxococcota;c__Polyangia;o__Polyangiales;f__Polyangiaceae;g__JAAFHV01;s__JAAFHV01 sp016720545	37	1	2.67e-09
100671750	BC-0332570062|k141_61782	Lenarviricota	d__Bacteria;p__Myxococcota;c__Polyangia;o__Polyangiales;f__Polyangiaceae;g__JAAFHV01;s__JAAFHV01 sp016720545	33	0	9.59e-09
100671750	SRR17509979|k141_62709_flag=1_multi=44.0000_len=2751	Pisuviricota	d__Bacteria;p__Myxococcota;c__Polyangia;o__Polyangiales;f__Polyangiaceae;g__JAAFHV01;s__JAAFHV01 sp016720545	40	1	5.73e-11
100671750	SRR17497064|k141_135790_flag=1_multi=52.0000_len=1739	Pisuviricota	d__Bacteria;p__Myxococcota;c__Polyangia;o__Polyangiales;f__Polyangiaceae;g__JAAFHV01;s__JAAFHV01 sp016720545	53	0	1.22e-17
100671750	SRR17509940|k141_117101_flag=1_multi=38.0000_len=2457	Duplornaviricota	d__Bacteria;p__Myxococcota;c__Polyangia;o__Polyangiales;f__Polyangiaceae;g__JAAFHV01;s__JAAFHV01 sp016720545	31	0	2.08e-05
100671750	SRR17497069|k141_154292_flag=1_multi=166.0000_len=1714	Pisuviricota	d__Bacteria;p__Myxococcota;c__Polyangia;o__Polyangiales;f__Polyangiaceae;g__JAAFHV01;s__JAAFHV01 sp016720545	43	4	1.24e-07
100671750	SRR17481244|k141_53629_flag=1_multi=27.0000_len=3662	Lenarviricota	d__Bacteria;p__Myxococcota;c__Polyangia;o__Polyangiales;f__Polyangiaceae;g__JAAFHV01;s__JAAFHV01 sp016720545	46	1	2.06e-10
100671750	SRR11450579|k141_22903_flag=1_multi=93.0000_len=8250	Pisuviricota	d__Bacteria;p__Myxococcota;c__Polyangia;o__Polyangiales;f__Polyangiaceae;g__JAAFHV01;s__JAAFHV01 sp016720545	27	0	2.08e-05
100671750	SRR17509978|k141_113185_flag=1_multi=9.0000_len=1199	Pisuviricota	d__Bacteria;p__Myxococcota;c__Polyangia;o__Polyangiales;f__Polyangiaceae;g__JAAFHV01;s__JAAFHV01 sp016720545	43	5	5.77e-06
100671750	BC-0345273217|k141_606	Lenarviricota	d__Bacteria;p__Myxococcota;c__Polyangia;o__Polyangiales;f__Polyangiaceae;g__JAAFHV01;s__JAAFHV01 sp016720545	33	1	4.46e-07
100671750	SRR17509978|k141_111246_flag=1_multi=25.3407_len=1855	Pisuviricota	d__Bacteria;p__Myxococcota;c__Polyangia;o__Polyangiales;f__Polyangiaceae;g__JAAFHV01;s__JAAFHV01 sp016720545	52	3	4.43e-12
100671750	SRR17509976|k141_164083_flag=1_multi=58.0000_len=4337	Pisuviricota	d__Bacteria;p__Myxococcota;c__Polyangia;o__Polyangiales;f__Polyangiaceae;g__JAAFHV01;s__JAAFHV01 sp016720545	43	5	5.77e-06
100671750	SRR17497098|k141_13697_flag=1_multi=34.0000_len=1851	Pisuviricota	d__Bacteria;p__Myxococcota;c__Polyangia;o__Polyangiales;f__Polyangiaceae;g__JAAFHV01;s__JAAFHV01 sp016720545	67	8	2.65e-14
100671750	SRR14530880|k119_2620_flag=1_multi=62.0000_len=4380	Kitrinoviricota	d__Bacteria;p__Myxococcota;c__Polyangia;o__Polyangiales;f__Polyangiaceae;g__JAAFHV01;s__JAAFHV01 sp016720545	49	0	1.59e-11
100671750	SRR17497054|k141_191824_flag=1_multi=13.0000_len=2259	Pisuviricota	d__Bacteria;p__Myxococcota;c__Polyangia;o__Polyangiales;f__Polyangiaceae;g__JAAFHV01;s__JAAFHV01 sp016720545	53	3	1.23e-12
100671750	SRR17509979|k141_54497_flag=1_multi=434.0000_len=1853	Pisuviricota	d__Bacteria;p__Myxococcota;c__Polyangia;o__Polyangiales;f__Polyangiaceae;g__JAAFHV01;s__JAAFHV01 sp016720545	64	0	7.31e-20
100671750	SRR17497126|k141_95757_flag=1_multi=826.0000_len=3116	Lenarviricota	d__Bacteria;p__Myxococcota;c__Polyangia;o__Polyangiales;f__Polyangiaceae;g__JAAFHV01;s__JAAFHV01 sp016720545	41	3	3.45e-08
100671750	SRR10849744|k141_310535_flag=1_multi=101.0000_len=3955	Lenarviricota	d__Bacteria;p__Myxococcota;c__Polyangia;o__Polyangiales;f__Polyangiaceae;g__JAAFHV01;s__JAAFHV01 sp016720545	39	0	4.43e-12
100671750	SRR17509979|k141_28799_flag=1_multi=182.0000_len=1917	Pisuviricota	d__Bacteria;p__Myxococcota;c__Polyangia;o__Polyangiales;f__Polyangiaceae;g__JAAFHV01;s__JAAFHV01 sp016720545	50	0	5.69e-16
100671750	SRR17509979|k141_52575_flag=1_multi=83.6741_len=1804	Pisuviricota	d__Bacteria;p__Myxococcota;c__Polyangia;o__Polyangiales;f__Polyangiaceae;g__JAAFHV01;s__JAAFHV01 sp016720545	53	0	1.22e-17
100671750	SRR17509977|k141_137261_flag=1_multi=15.0000_len=2450	Kitrinoviricota	d__Bacteria;p__Myxococcota;c__Polyangia;o__Polyangiales;f__Polyangiaceae;g__JAAFHV01;s__JAAFHV01 sp016720545	43	5	5.77e-06
100671750	SRR17509977|k141_156580_flag=1_multi=3.0000_len=1406	Pisuviricota	d__Bacteria;p__Myxococcota;c__Polyangia;o__Polyangiales;f__Polyangiaceae;g__JAAFHV01;s__JAAFHV01 sp016720545	35	1	3.45e-08
100671750	SRR17509979|k141_11840_flag=1_multi=73.0000_len=1384	Pisuviricota	d__Bacteria;p__Myxococcota;c__Polyangia;o__Polyangiales;f__Polyangiaceae;g__JAAFHV01;s__JAAFHV01 sp016720545	33	1	7.47e-05
100671750	SRR17509979|k141_40329_flag=1_multi=17.0000_len=1013	Pisuviricota	d__Bacteria;p__Myxococcota;c__Polyangia;o__Polyangiales;f__Polyangiaceae;g__JAAFHV01;s__JAAFHV01 sp016720545	36	3	2.08e-05
100671750	SRR18770931|k141_53716_flag=1_multi=6.0000_len=1000	Lenarviricota	d__Bacteria;p__Myxococcota;c__Polyangia;o__Polyangiales;f__Polyangiaceae;g__JAAFHV01;s__JAAFHV01 sp016720545	38	3	1.61e-06
100671750	SRR17509976|k141_100049_flag=1_multi=72.0000_len=1862	Pisuviricota	d__Bacteria;p__Myxococcota;c__Polyangia;o__Polyangiales;f__Polyangiaceae;g__JAAFHV01;s__JAAFHV01 sp016720545	51	5	1.61e-06
100671750	SRR5829964|k141_20917_flag=1_multi=123.0000_len=1791	Kitrinoviricota	d__Bacteria;p__Myxococcota;c__Polyangia;o__Polyangiales;f__Polyangiaceae;g__JAAFHV01;s__JAAFHV01 sp016720545	37	4	0.000269
100671750	SRR17509977|k141_51278_flag=1_multi=666.0000_len=6190	Pisuviricota	d__Bacteria;p__Myxococcota;c__Polyangia;o__Polyangiales;f__Polyangiaceae;g__JAAFHV01;s__JAAFHV01 sp016720545	46	3	9.59e-09
100671751	SRR11450579|k141_22903_flag=1_multi=93.0000_len=8250	Pisuviricota	d__Bacteria;p__Myxococcota;c__Polyangia;o__Polyangiales;f__Polyangiaceae;g__JAAFHV01;s__JAAFHV01 sp016720545	27	0	1.68e-05
100671751	SRR17497054|k141_191824_flag=1_multi=13.0000_len=2259	Pisuviricota	d__Bacteria;p__Myxococcota;c__Polyangia;o__Polyangiales;f__Polyangiaceae;g__JAAFHV01;s__JAAFHV01 sp016720545	40	0	9.96e-13
100671751	SRR17497126|k141_68629_flag=1_multi=6.0000_len=1048	Pisuviricota	d__Bacteria;p__Myxococcota;c__Polyangia;o__Polyangiales;f__Polyangiaceae;g__JAAFHV01;s__JAAFHV01 sp016720545	24	0	0.000781
100671751	SRR17481244|k141_92016_flag=1_multi=44.0000_len=3519	Lenarviricota	d__Bacteria;p__Myxococcota;c__Polyangia;o__Polyangiales;f__Polyangiaceae;g__JAAFHV01;s__JAAFHV01 sp016720545	34	0	2.16e-09
100671751	SRR11829331|k141_332492_flag=1_multi=252.0000_len=4351	Lenarviricota	d__Bacteria;p__Myxococcota;c__Polyangia;o__Polyangiales;f__Polyangiaceae;g__JAAFHV01;s__JAAFHV01 sp016720545	76	5	2.11e-24
100671751	BC-0332570062|k141_61782	Lenarviricota	d__Bacteria;p__Myxococcota;c__Polyangia;o__Polyangiales;f__Polyangiaceae;g__JAAFHV01;s__JAAFHV01 sp016720545	33	0	7.76e-09
100671751	SRR17509979|k141_62709_flag=1_multi=44.0000_len=2751	Pisuviricota	d__Bacteria;p__Myxococcota;c__Polyangia;o__Polyangiales;f__Polyangiaceae;g__JAAFHV01;s__JAAFHV01 sp016720545	40	1	4.64e-11
100671751	SRR17497126|k141_95757_flag=1_multi=826.0000_len=3116	Lenarviricota	d__Bacteria;p__Myxococcota;c__Polyangia;o__Polyangiales;f__Polyangiaceae;g__JAAFHV01;s__JAAFHV01 sp016720545	41	3	2.79e-08
100671751	SRR5829964|k141_20917_flag=1_multi=123.0000_len=1791	Kitrinoviricota	d__Bacteria;p__Myxococcota;c__Polyangia;o__Polyangiales;f__Polyangiaceae;g__JAAFHV01;s__JAAFHV01 sp016720545	31	2	0.000217
100671751	SRR10849744|k141_310535_flag=1_multi=101.0000_len=3955	Lenarviricota	d__Bacteria;p__Myxococcota;c__Polyangia;o__Polyangiales;f__Polyangiaceae;g__JAAFHV01;s__JAAFHV01 sp016720545	40	0	9.96e-13
100671751	SRR17497064|k141_135790_flag=1_multi=52.0000_len=1739	Pisuviricota	d__Bacteria;p__Myxococcota;c__Polyangia;o__Polyangiales;f__Polyangiaceae;g__JAAFHV01;s__JAAFHV01 sp016720545	51	1	3.56e-17
100671751	SRR17509979|k141_54497_flag=1_multi=434.0000_len=1853	Pisuviricota	d__Bacteria;p__Myxococcota;c__Polyangia;o__Polyangiales;f__Polyangiaceae;g__JAAFHV01;s__JAAFHV01 sp016720545	58	3	9.89e-18
100671751	SRR14530880|k119_2620_flag=1_multi=62.0000_len=4380	Kitrinoviricota	d__Bacteria;p__Myxococcota;c__Polyangia;o__Polyangiales;f__Polyangiaceae;g__JAAFHV01;s__JAAFHV01 sp016720545	34	0	2.16e-09
100671751	SRR17497064|k141_128537_flag=1_multi=9.0000_len=1004	Pisuviricota	d__Bacteria;p__Myxococcota;c__Polyangia;o__Polyangiales;f__Polyangiaceae;g__JAAFHV01;s__JAAFHV01 sp016720545	31	1	4.67e-06
100671751	SRR17509979|k141_52575_flag=1_multi=83.6741_len=1804	Pisuviricota	d__Bacteria;p__Myxococcota;c__Polyangia;o__Polyangiales;f__Polyangiaceae;g__JAAFHV01;s__JAAFHV01 sp016720545	51	1	3.56e-17
100671751	SRR11565437|k141_190787_flag=1_multi=8.0000_len=2964	Kitrinoviricota	d__Bacteria;p__Myxococcota;c__Polyangia;o__Polyangiales;f__Polyangiaceae;g__JAAFHV01;s__JAAFHV01 sp016720545	28	0	4.67e-06
100671751	SRR11648360|k141_236875_flag=1_multi=13.0000_len=4864	urv.p.001	d__Bacteria;p__Myxococcota;c__Polyangia;o__Polyangiales;f__Polyangiaceae;g__JAAFHV01;s__JAAFHV01 sp016720545	28	0	4.67e-06
100671751	SRR10849374|k141_218357_flag=1_multi=12.0000_len=3750	Lenarviricota	d__Bacteria;p__Myxococcota;c__Polyangia;o__Polyangiales;f__Polyangiaceae;g__JAAFHV01;s__JAAFHV01 sp016720545	34	0	2.16e-09
100671751	SRR17509979|k141_40329_flag=1_multi=17.0000_len=1013	Pisuviricota	d__Bacteria;p__Myxococcota;c__Polyangia;o__Polyangiales;f__Polyangiaceae;g__JAAFHV01;s__JAAFHV01 sp016720545	29	1	6.04e-05
100671751	SRR11648176|k141_298601_flag=1_multi=36.0000_len=3120	Kitrinoviricota	d__Bacteria;p__Myxococcota;c__Polyangia;o__Polyangiales;f__Polyangiaceae;g__JAAFHV01;s__JAAFHV01 sp016720545	58	3	9.89e-18
100671751	SRR17497049|k141_87067_flag=1_multi=464.0000_len=3624	Lenarviricota	d__Bacteria;p__Myxococcota;c__Polyangia;o__Polyangiales;f__Polyangiaceae;g__JAAFHV01;s__JAAFHV01 sp016720545	51	7	6.04e-05
100671751	SRR17509979|k141_53443_flag=1_multi=169.8080_len=4630	Kitrinoviricota	d__Bacteria;p__Myxococcota;c__Polyangia;o__Polyangiales;f__Polyangiaceae;g__JAAFHV01;s__JAAFHV01 sp016720545	74	0	1.27e-21
100671751	SRR17509979|k141_28799_flag=1_multi=182.0000_len=1917	Pisuviricota	d__Bacteria;p__Myxococcota;c__Polyangia;o__Polyangiales;f__Polyangiaceae;g__JAAFHV01;s__JAAFHV01 sp016720545	50	0	4.6e-16
100671751	SRR17509940|k141_117101_flag=1_multi=38.0000_len=2457	Duplornaviricota	d__Bacteria;p__Myxococcota;c__Polyangia;o__Polyangiales;f__Polyangiaceae;g__JAAFHV01;s__JAAFHV01 sp016720545	26	0	6.04e-05
100671751	SRR17509978|k141_111246_flag=1_multi=25.3407_len=1855	Pisuviricota	d__Bacteria;p__Myxococcota;c__Polyangia;o__Polyangiales;f__Polyangiaceae;g__JAAFHV01;s__JAAFHV01 sp016720545	41	0	2.77e-13
100671751	SRR17497092|k141_33398_flag=1_multi=217.0121_len=1878	Pisuviricota	d__Bacteria;p__Myxococcota;c__Polyangia;o__Polyangiales;f__Polyangiaceae;g__JAAFHV01;s__JAAFHV01 sp016720545	58	3	9.89e-18
100671751	BC-0345298860|k141_3179	Lenarviricota	d__Bacteria;p__Myxococcota;c__Polyangia;o__Polyangiales;f__Polyangiaceae;g__JAAFHV01;s__JAAFHV01 sp016720545	76	5	2.11e-24
100671751	SRR17509976|k141_164083_flag=1_multi=58.0000_len=4337	Pisuviricota	d__Bacteria;p__Myxococcota;c__Polyangia;o__Polyangiales;f__Polyangiaceae;g__JAAFHV01;s__JAAFHV01 sp016720545	34	2	4.67e-06
100671751	SRR17497069|k141_154292_flag=1_multi=166.0000_len=1714	Pisuviricota	d__Bacteria;p__Myxococcota;c__Polyangia;o__Polyangiales;f__Polyangiaceae;g__JAAFHV01;s__JAAFHV01 sp016720545	43	4	1e-07
100671751	SRR18771403|k141_131354_flag=1_multi=48.8407_len=10690	Pisuviricota	d__Bacteria;p__Myxococcota;c__Polyangia;o__Polyangiales;f__Polyangiaceae;g__JAAFHV01;s__JAAFHV01 sp016720545	58	3	9.89e-18
100671751	SRR17497098|k141_13697_flag=1_multi=34.0000_len=1851	Pisuviricota	d__Bacteria;p__Myxococcota;c__Polyangia;o__Polyangiales;f__Polyangiaceae;g__JAAFHV01;s__JAAFHV01 sp016720545	72	6	1.67e-10
100671751	SRR17481242|k141_14860_flag=1_multi=140.0000_len=3974	Unclassified	d__Bacteria;p__Myxococcota;c__Polyangia;o__Polyangiales;f__Polyangiaceae;g__JAAFHV01;s__JAAFHV01 sp016720545	70	0	2.13e-19
100671751	SRR11828805|k141_11533_flag=1_multi=89.8329_len=3648	Kitrinoviricota	d__Bacteria;p__Myxococcota;c__Polyangia;o__Polyangiales;f__Polyangiaceae;g__JAAFHV01;s__JAAFHV01 sp016720545	43	2	4.64e-11
100671751	SRR17497068|k141_144847_flag=1_multi=37.7881_len=1816	Pisuviricota	d__Bacteria;p__Myxococcota;c__Polyangia;o__Polyangiales;f__Polyangiaceae;g__JAAFHV01;s__JAAFHV01 sp016720545	76	5	2.11e-24
100671751	SRR17509977|k141_51278_flag=1_multi=666.0000_len=6190	Pisuviricota	d__Bacteria;p__Myxococcota;c__Polyangia;o__Polyangiales;f__Polyangiaceae;g__JAAFHV01;s__JAAFHV01 sp016720545	39	2	7.76e-09
100671751	SRR17509967|k141_44924_flag=1_multi=7.0000_len=2320	Pisuviricota	d__Bacteria;p__Myxococcota;c__Polyangia;o__Polyangiales;f__Polyangiaceae;g__JAAFHV01;s__JAAFHV01 sp016720545	39	3	3.61e-07
100671751	SRR17509978|k141_113185_flag=1_multi=9.0000_len=1199	Pisuviricota	d__Bacteria;p__Myxococcota;c__Polyangia;o__Polyangiales;f__Polyangiaceae;g__JAAFHV01;s__JAAFHV01 sp016720545	36	3	1.68e-05
100671751	SRR17509976|k141_100049_flag=1_multi=72.0000_len=1862	Pisuviricota	d__Bacteria;p__Myxococcota;c__Polyangia;o__Polyangiales;f__Polyangiaceae;g__JAAFHV01;s__JAAFHV01 sp016720545	43	4	1e-07
100671751	SRR17509977|k141_137261_flag=1_multi=15.0000_len=2450	Kitrinoviricota	d__Bacteria;p__Myxococcota;c__Polyangia;o__Polyangiales;f__Polyangiaceae;g__JAAFHV01;s__JAAFHV01 sp016720545	34	2	4.67e-06
100671751	SRR17481244|k141_53629_flag=1_multi=27.0000_len=3662	Lenarviricota	d__Bacteria;p__Myxococcota;c__Polyangia;o__Polyangiales;f__Polyangiaceae;g__JAAFHV01;s__JAAFHV01 sp016720545	41	2	6e-10
100671751	SRR18770931|k141_53716_flag=1_multi=6.0000_len=1000	Lenarviricota	d__Bacteria;p__Myxococcota;c__Polyangia;o__Polyangiales;f__Polyangiaceae;g__JAAFHV01;s__JAAFHV01 sp016720545	38	3	1.3e-06
100671752	SRR17481244|k141_92016_flag=1_multi=44.0000_len=3519	Lenarviricota	d__Bacteria;p__Myxococcota;c__Polyangia;o__Polyangiales;f__Polyangiaceae;g__JAAFHV01;s__JAAFHV01 sp016720545	34	0	2.24e-09
100671752	SRR14530880|k119_2620_flag=1_multi=62.0000_len=4380	Kitrinoviricota	d__Bacteria;p__Myxococcota;c__Polyangia;o__Polyangiales;f__Polyangiaceae;g__JAAFHV01;s__JAAFHV01 sp016720545	72	8	6.19e-15
100671752	SRR17509940|k141_117101_flag=1_multi=38.0000_len=2457	Duplornaviricota	d__Bacteria;p__Myxococcota;c__Polyangia;o__Polyangiales;f__Polyangiaceae;g__JAAFHV01;s__JAAFHV01 sp016720545	27	0	1.75e-05
100671752	SRR17509979|k141_28799_flag=1_multi=182.0000_len=1917	Pisuviricota	d__Bacteria;p__Myxococcota;c__Polyangia;o__Polyangiales;f__Polyangiaceae;g__JAAFHV01;s__JAAFHV01 sp016720545	50	0	4.78e-16
100671752	SRR17509978|k141_111246_flag=1_multi=25.3407_len=1855	Pisuviricota	d__Bacteria;p__Myxococcota;c__Polyangia;o__Polyangiales;f__Polyangiaceae;g__JAAFHV01;s__JAAFHV01 sp016720545	41	0	2.88e-13
100671752	SRR10849374|k141_218357_flag=1_multi=12.0000_len=3750	Lenarviricota	d__Bacteria;p__Myxococcota;c__Polyangia;o__Polyangiales;f__Polyangiaceae;g__JAAFHV01;s__JAAFHV01 sp016720545	37	1	2.24e-09
100671752	SRR10849744|k141_310535_flag=1_multi=101.0000_len=3955	Lenarviricota	d__Bacteria;p__Myxococcota;c__Polyangia;o__Polyangiales;f__Polyangiaceae;g__JAAFHV01;s__JAAFHV01 sp016720545	39	0	3.73e-12
100671752	SRR11648360|k141_236875_flag=1_multi=13.0000_len=4864	urv.p.001	d__Bacteria;p__Myxococcota;c__Polyangia;o__Polyangiales;f__Polyangiaceae;g__JAAFHV01;s__JAAFHV01 sp016720545	30	0	3.75e-07
100671752	SRR11450579|k141_22903_flag=1_multi=93.0000_len=8250	Pisuviricota	d__Bacteria;p__Myxococcota;c__Polyangia;o__Polyangiales;f__Polyangiaceae;g__JAAFHV01;s__JAAFHV01 sp016720545	27	0	1.75e-05
100671752	SRR17497098|k141_13697_flag=1_multi=34.0000_len=1851	Pisuviricota	d__Bacteria;p__Myxococcota;c__Polyangia;o__Polyangiales;f__Polyangiaceae;g__JAAFHV01;s__JAAFHV01 sp016720545	70	5	2.88e-13
100671752	SRR11565437|k141_190787_flag=1_multi=8.0000_len=2964	Kitrinoviricota	d__Bacteria;p__Myxococcota;c__Polyangia;o__Polyangiales;f__Polyangiaceae;g__JAAFHV01;s__JAAFHV01 sp016720545	28	0	4.85e-06
100671752	SRR11828805|k141_11533_flag=1_multi=89.8329_len=3648	Kitrinoviricota	d__Bacteria;p__Myxococcota;c__Polyangia;o__Polyangiales;f__Polyangiaceae;g__JAAFHV01;s__JAAFHV01 sp016720545	44	2	1.34e-11
100671752	SRR17497054|k141_191824_flag=1_multi=13.0000_len=2259	Pisuviricota	d__Bacteria;p__Myxococcota;c__Polyangia;o__Polyangiales;f__Polyangiaceae;g__JAAFHV01;s__JAAFHV01 sp016720545	58	6	1.04e-12
100671752	SRR11648176|k141_298601_flag=1_multi=36.0000_len=3120	Kitrinoviricota	d__Bacteria;p__Myxococcota;c__Polyangia;o__Polyangiales;f__Polyangiaceae;g__JAAFHV01;s__JAAFHV01 sp016720545	60	1	3.67e-22
100671752	SRR17497064|k141_128537_flag=1_multi=9.0000_len=1004	Pisuviricota	d__Bacteria;p__Myxococcota;c__Polyangia;o__Polyangiales;f__Polyangiaceae;g__JAAFHV01;s__JAAFHV01 sp016720545	31	1	4.85e-06
100671752	SRR17509979|k141_52575_flag=1_multi=83.6741_len=1804	Pisuviricota	d__Bacteria;p__Myxococcota;c__Polyangia;o__Polyangiales;f__Polyangiaceae;g__JAAFHV01;s__JAAFHV01 sp016720545	53	0	1.03e-17
100671752	SRR18771403|k141_131354_flag=1_multi=48.8407_len=10690	Pisuviricota	d__Bacteria;p__Myxococcota;c__Polyangia;o__Polyangiales;f__Polyangiaceae;g__JAAFHV01;s__JAAFHV01 sp016720545	62	0	4.75e-21
100671752	SRR17497064|k141_135790_flag=1_multi=52.0000_len=1739	Pisuviricota	d__Bacteria;p__Myxococcota;c__Polyangia;o__Polyangiales;f__Polyangiaceae;g__JAAFHV01;s__JAAFHV01 sp016720545	52	1	1.03e-17
100671752	BC-0332570062|k141_61782	Lenarviricota	d__Bacteria;p__Myxococcota;c__Polyangia;o__Polyangiales;f__Polyangiaceae;g__JAAFHV01;s__JAAFHV01 sp016720545	33	0	8.06e-09
100671752	SRR17509977|k141_156580_flag=1_multi=3.0000_len=1406	Pisuviricota	d__Bacteria;p__Myxococcota;c__Polyangia;o__Polyangiales;f__Polyangiaceae;g__JAAFHV01;s__JAAFHV01 sp016720545	36	2	3.75e-07
100671752	SRR17497068|k141_144847_flag=1_multi=37.7881_len=1816	Pisuviricota	d__Bacteria;p__Myxococcota;c__Polyangia;o__Polyangiales;f__Polyangiaceae;g__JAAFHV01;s__JAAFHV01 sp016720545	73	3	4.72e-26
100671752	SRR11829331|k141_332492_flag=1_multi=252.0000_len=4351	Lenarviricota	d__Bacteria;p__Myxococcota;c__Polyangia;o__Polyangiales;f__Polyangiaceae;g__JAAFHV01;s__JAAFHV01 sp016720545	73	3	4.72e-26
100671752	SRR17509979|k141_53443_flag=1_multi=169.8080_len=4630	Kitrinoviricota	d__Bacteria;p__Myxococcota;c__Polyangia;o__Polyangiales;f__Polyangiaceae;g__JAAFHV01;s__JAAFHV01 sp016720545	72	0	2.19e-24
100671752	SRR17497126|k141_68629_flag=1_multi=6.0000_len=1048	Pisuviricota	d__Bacteria;p__Myxococcota;c__Polyangia;o__Polyangiales;f__Polyangiaceae;g__JAAFHV01;s__JAAFHV01 sp016720545	24	0	0.000812
100671752	SRR17509979|k141_11840_flag=1_multi=73.0000_len=1384	Pisuviricota	d__Bacteria;p__Myxococcota;c__Polyangia;o__Polyangiales;f__Polyangiaceae;g__JAAFHV01;s__JAAFHV01 sp016720545	32	2	6.28e-05
100671752	SRR17497069|k141_154292_flag=1_multi=166.0000_len=1714	Pisuviricota	d__Bacteria;p__Myxococcota;c__Polyangia;o__Polyangiales;f__Polyangiaceae;g__JAAFHV01;s__JAAFHV01 sp016720545	43	4	1.04e-07
100671752	SRR17509977|k141_51278_flag=1_multi=666.0000_len=6190	Pisuviricota	d__Bacteria;p__Myxococcota;c__Polyangia;o__Polyangiales;f__Polyangiaceae;g__JAAFHV01;s__JAAFHV01 sp016720545	42	3	8.06e-09
100671752	SRR17509976|k141_164083_flag=1_multi=58.0000_len=4337	Pisuviricota	d__Bacteria;p__Myxococcota;c__Polyangia;o__Polyangiales;f__Polyangiaceae;g__JAAFHV01;s__JAAFHV01 sp016720545	34	2	4.85e-06
100671752	SRR17481242|k141_14860_flag=1_multi=140.0000_len=3974	Unclassified	d__Bacteria;p__Myxococcota;c__Polyangia;o__Polyangiales;f__Polyangiaceae;g__JAAFHV01;s__JAAFHV01 sp016720545	66	1	2.84e-23
100671752	SRR17509977|k141_137261_flag=1_multi=15.0000_len=2450	Kitrinoviricota	d__Bacteria;p__Myxococcota;c__Polyangia;o__Polyangiales;f__Polyangiaceae;g__JAAFHV01;s__JAAFHV01 sp016720545	34	2	4.85e-06
100671752	SRR17497126|k141_95757_flag=1_multi=826.0000_len=3116	Lenarviricota	d__Bacteria;p__Myxococcota;c__Polyangia;o__Polyangiales;f__Polyangiaceae;g__JAAFHV01;s__JAAFHV01 sp016720545	41	3	2.9e-08
100671752	SRR5829964|k141_20917_flag=1_multi=123.0000_len=1791	Kitrinoviricota	d__Bacteria;p__Myxococcota;c__Polyangia;o__Polyangiales;f__Polyangiaceae;g__JAAFHV01;s__JAAFHV01 sp016720545	31	2	0.000226
100671752	SRR17509967|k141_44924_flag=1_multi=7.0000_len=2320	Pisuviricota	d__Bacteria;p__Myxococcota;c__Polyangia;o__Polyangiales;f__Polyangiaceae;g__JAAFHV01;s__JAAFHV01 sp016720545	39	3	3.75e-07
100671752	BC-0345298860|k141_3179	Lenarviricota	d__Bacteria;p__Myxococcota;c__Polyangia;o__Polyangiales;f__Polyangiaceae;g__JAAFHV01;s__JAAFHV01 sp016720545	73	3	4.72e-26
100671752	SRR17509979|k141_62709_flag=1_multi=44.0000_len=2751	Pisuviricota	d__Bacteria;p__Myxococcota;c__Polyangia;o__Polyangiales;f__Polyangiaceae;g__JAAFHV01;s__JAAFHV01 sp016720545	40	1	4.82e-11
100671752	SRR17509979|k141_40329_flag=1_multi=17.0000_len=1013	Pisuviricota	d__Bacteria;p__Myxococcota;c__Polyangia;o__Polyangiales;f__Polyangiaceae;g__JAAFHV01;s__JAAFHV01 sp016720545	32	2	6.28e-05
100671752	SRR17497092|k141_33398_flag=1_multi=217.0121_len=1878	Pisuviricota	d__Bacteria;p__Myxococcota;c__Polyangia;o__Polyangiales;f__Polyangiaceae;g__JAAFHV01;s__JAAFHV01 sp016720545	58	1	4.75e-21
100671752	SRR17509979|k141_54497_flag=1_multi=434.0000_len=1853	Pisuviricota	d__Bacteria;p__Myxococcota;c__Polyangia;o__Polyangiales;f__Polyangiaceae;g__JAAFHV01;s__JAAFHV01 sp016720545	63	0	1.32e-21
100671752	SRR17509976|k141_100049_flag=1_multi=72.0000_len=1862	Pisuviricota	d__Bacteria;p__Myxococcota;c__Polyangia;o__Polyangiales;f__Polyangiaceae;g__JAAFHV01;s__JAAFHV01 sp016720545	46	5	1.04e-07
100671752	SRR17481244|k141_53629_flag=1_multi=27.0000_len=3662	Lenarviricota	d__Bacteria;p__Myxococcota;c__Polyangia;o__Polyangiales;f__Polyangiaceae;g__JAAFHV01;s__JAAFHV01 sp016720545	42	2	1.73e-10
100671752	SRR18770931|k141_53716_flag=1_multi=6.0000_len=1000	Lenarviricota	d__Bacteria;p__Myxococcota;c__Polyangia;o__Polyangiales;f__Polyangiaceae;g__JAAFHV01;s__JAAFHV01 sp016720545	38	3	1.35e-06
100671752	SRR17509978|k141_113185_flag=1_multi=9.0000_len=1199	Pisuviricota	d__Bacteria;p__Myxococcota;c__Polyangia;o__Polyangiales;f__Polyangiaceae;g__JAAFHV01;s__JAAFHV01 sp016720545	39	4	1.75e-05
100671753	SRR17509979|k141_28799_flag=1_multi=182.0000_len=1917	Pisuviricota	d__Bacteria;p__Myxococcota;c__Polyangia;o__Polyangiales;f__Polyangiaceae;g__JAAFHV01;s__JAAFHV01 sp016720545	49	0	9.11e-18
100671753	SRR17509979|k141_62709_flag=1_multi=44.0000_len=2751	Pisuviricota	d__Bacteria;p__Myxococcota;c__Polyangia;o__Polyangiales;f__Polyangiaceae;g__JAAFHV01;s__JAAFHV01 sp016720545	40	1	4.27e-11
100671753	SRR17497098|k141_13697_flag=1_multi=34.0000_len=1851	Pisuviricota	d__Bacteria;p__Myxococcota;c__Polyangia;o__Polyangiales;f__Polyangiaceae;g__JAAFHV01;s__JAAFHV01 sp016720545	67	6	9.11e-18
100671753	SRR11648360|k141_236875_flag=1_multi=13.0000_len=4864	urv.p.001	d__Bacteria;p__Myxococcota;c__Polyangia;o__Polyangiales;f__Polyangiaceae;g__JAAFHV01;s__JAAFHV01 sp016720545	29	0	1.2e-06
100671753	SRR17481244|k141_92016_flag=1_multi=44.0000_len=3519	Lenarviricota	d__Bacteria;p__Myxococcota;c__Polyangia;o__Polyangiales;f__Polyangiaceae;g__JAAFHV01;s__JAAFHV01 sp016720545	34	0	1.99e-09
100671753	SRR17509979|k141_40329_flag=1_multi=17.0000_len=1013	Pisuviricota	d__Bacteria;p__Myxococcota;c__Polyangia;o__Polyangiales;f__Polyangiaceae;g__JAAFHV01;s__JAAFHV01 sp016720545	32	2	5.56e-05
100671753	SRR17509979|k141_53443_flag=1_multi=169.8080_len=4630	Kitrinoviricota	d__Bacteria;p__Myxococcota;c__Polyangia;o__Polyangiales;f__Polyangiaceae;g__JAAFHV01;s__JAAFHV01 sp016720545	69	0	6.95e-29
100671753	SRR17497064|k141_128537_flag=1_multi=9.0000_len=1004	Pisuviricota	d__Bacteria;p__Myxococcota;c__Polyangia;o__Polyangiales;f__Polyangiaceae;g__JAAFHV01;s__JAAFHV01 sp016720545	31	1	4.3e-06
100671753	SRR17497126|k141_68629_flag=1_multi=6.0000_len=1048	Pisuviricota	d__Bacteria;p__Myxococcota;c__Polyangia;o__Polyangiales;f__Polyangiaceae;g__JAAFHV01;s__JAAFHV01 sp016720545	24	0	0.00072
100671753	SRR17481242|k141_14860_flag=1_multi=140.0000_len=3974	Unclassified	d__Bacteria;p__Myxococcota;c__Polyangia;o__Polyangiales;f__Polyangiaceae;g__JAAFHV01;s__JAAFHV01 sp016720545	65	0	1.16e-26
100671753	SRR11450579|k141_22903_flag=1_multi=93.0000_len=8250	Pisuviricota	d__Bacteria;p__Myxococcota;c__Polyangia;o__Polyangiales;f__Polyangiaceae;g__JAAFHV01;s__JAAFHV01 sp016720545	27	0	1.55e-05
100671753	SRR11648176|k141_298601_flag=1_multi=36.0000_len=3120	Kitrinoviricota	d__Bacteria;p__Myxococcota;c__Polyangia;o__Polyangiales;f__Polyangiaceae;g__JAAFHV01;s__JAAFHV01 sp016720545	59	0	2.52e-23
100671753	SRR17509979|k141_54497_flag=1_multi=434.0000_len=1853	Pisuviricota	d__Bacteria;p__Myxococcota;c__Polyangia;o__Polyangiales;f__Polyangiaceae;g__JAAFHV01;s__JAAFHV01 sp016720545	61	0	1.94e-24
100671753	SRR17509940|k141_117101_flag=1_multi=38.0000_len=2457	Duplornaviricota	d__Bacteria;p__Myxococcota;c__Polyangia;o__Polyangiales;f__Polyangiaceae;g__JAAFHV01;s__JAAFHV01 sp016720545	27	0	1.55e-05
100671753	SRR10849744|k141_310535_flag=1_multi=101.0000_len=3955	Lenarviricota	d__Bacteria;p__Myxococcota;c__Polyangia;o__Polyangiales;f__Polyangiaceae;g__JAAFHV01;s__JAAFHV01 sp016720545	41	1	1.19e-11
100671753	SRR17497049|k141_87067_flag=1_multi=464.0000_len=3624	Lenarviricota	d__Bacteria;p__Myxococcota;c__Polyangia;o__Polyangiales;f__Polyangiaceae;g__JAAFHV01;s__JAAFHV01 sp016720545	57	9	3.32e-07
100671753	SRR17497069|k141_154292_flag=1_multi=166.0000_len=1714	Pisuviricota	d__Bacteria;p__Myxococcota;c__Polyangia;o__Polyangiales;f__Polyangiaceae;g__JAAFHV01;s__JAAFHV01 sp016720545	43	4	9.24e-08
100671753	BC-0345298860|k141_3179	Lenarviricota	d__Bacteria;p__Myxococcota;c__Polyangia;o__Polyangiales;f__Polyangiaceae;g__JAAFHV01;s__JAAFHV01 sp016720545	86	2	5.33e-35
100671753	SRR17497064|k141_135790_flag=1_multi=52.0000_len=1739	Pisuviricota	d__Bacteria;p__Myxococcota;c__Polyangia;o__Polyangiales;f__Polyangiaceae;g__JAAFHV01;s__JAAFHV01 sp016720545	52	0	1.96e-19
100671753	SRR17509977|k141_51278_flag=1_multi=666.0000_len=6190	Pisuviricota	d__Bacteria;p__Myxococcota;c__Polyangia;o__Polyangiales;f__Polyangiaceae;g__JAAFHV01;s__JAAFHV01 sp016720545	42	3	7.14e-09
100671753	SRR10849374|k141_218357_flag=1_multi=12.0000_len=3750	Lenarviricota	d__Bacteria;p__Myxococcota;c__Polyangia;o__Polyangiales;f__Polyangiaceae;g__JAAFHV01;s__JAAFHV01 sp016720545	37	1	1.99e-09
100671753	SRR17509978|k141_111246_flag=1_multi=25.3407_len=1855	Pisuviricota	d__Bacteria;p__Myxococcota;c__Polyangia;o__Polyangiales;f__Polyangiaceae;g__JAAFHV01;s__JAAFHV01 sp016720545	51	3	7.09e-14
100671753	SRR17509967|k141_44924_flag=1_multi=7.0000_len=2320	Pisuviricota	d__Bacteria;p__Myxococcota;c__Polyangia;o__Polyangiales;f__Polyangiaceae;g__JAAFHV01;s__JAAFHV01 sp016720545	39	3	3.32e-07
100671753	SRR17497092|k141_33398_flag=1_multi=217.0121_len=1878	Pisuviricota	d__Bacteria;p__Myxococcota;c__Polyangia;o__Polyangiales;f__Polyangiaceae;g__JAAFHV01;s__JAAFHV01 sp016720545	58	0	9.05e-23
100671753	BC-0332570062|k141_61782	Lenarviricota	d__Bacteria;p__Myxococcota;c__Polyangia;o__Polyangiales;f__Polyangiaceae;g__JAAFHV01;s__JAAFHV01 sp016720545	33	0	7.14e-09
100671753	SRR11829331|k141_332492_flag=1_multi=252.0000_len=4351	Lenarviricota	d__Bacteria;p__Myxococcota;c__Polyangia;o__Polyangiales;f__Polyangiaceae;g__JAAFHV01;s__JAAFHV01 sp016720545	82	1	1.92e-34
100671753	SRR18771403|k141_131354_flag=1_multi=48.8407_len=10690	Pisuviricota	d__Bacteria;p__Myxococcota;c__Polyangia;o__Polyangiales;f__Polyangiaceae;g__JAAFHV01;s__JAAFHV01 sp016720545	60	0	6.99e-24
100671753	SRR17509979|k141_52575_flag=1_multi=83.6741_len=1804	Pisuviricota	d__Bacteria;p__Myxococcota;c__Polyangia;o__Polyangiales;f__Polyangiaceae;g__JAAFHV01;s__JAAFHV01 sp016720545	70	5	4.21e-21
100671753	SRR11565437|k141_190787_flag=1_multi=8.0000_len=2964	Kitrinoviricota	d__Bacteria;p__Myxococcota;c__Polyangia;o__Polyangiales;f__Polyangiaceae;g__JAAFHV01;s__JAAFHV01 sp016720545	52	5	3.32e-07
100671753	SRR14530880|k119_2620_flag=1_multi=62.0000_len=4380	Kitrinoviricota	d__Bacteria;p__Myxococcota;c__Polyangia;o__Polyangiales;f__Polyangiaceae;g__JAAFHV01;s__JAAFHV01 sp016720545	36	0	1.54e-10
100671753	SRR17497068|k141_144847_flag=1_multi=37.7881_len=1816	Pisuviricota	d__Bacteria;p__Myxococcota;c__Polyangia;o__Polyangiales;f__Polyangiaceae;g__JAAFHV01;s__JAAFHV01 sp016720545	79	0	1.92e-34
100671753	SRR17509976|k141_164083_flag=1_multi=58.0000_len=4337	Pisuviricota	d__Bacteria;p__Myxococcota;c__Polyangia;o__Polyangiales;f__Polyangiaceae;g__JAAFHV01;s__JAAFHV01 sp016720545	34	2	4.3e-06
100671753	SRR11828805|k141_11533_flag=1_multi=89.8329_len=3648	Kitrinoviricota	d__Bacteria;p__Myxococcota;c__Polyangia;o__Polyangiales;f__Polyangiaceae;g__JAAFHV01;s__JAAFHV01 sp016720545	44	2	1.19e-11
100671753	SRR17497054|k141_191824_flag=1_multi=13.0000_len=2259	Pisuviricota	d__Bacteria;p__Myxococcota;c__Polyangia;o__Polyangiales;f__Polyangiaceae;g__JAAFHV01;s__JAAFHV01 sp016720545	58	5	1.97e-14
100671753	SRR17481244|k141_53629_flag=1_multi=27.0000_len=3662	Lenarviricota	d__Bacteria;p__Myxococcota;c__Polyangia;o__Polyangiales;f__Polyangiaceae;g__JAAFHV01;s__JAAFHV01 sp016720545	52	2	3.3e-12
100671754	SRR11450585|k141_260925_flag=1_multi=20.0000_len=6420	Unclassified	d__Bacteria;p__Myxococcota;c__Polyangia;o__Polyangiales;f__Polyangiaceae;g__JAAFHV01;s__JAAFHV01 sp016720545	40	0	1.27e-10
100671754	SRR17481244|k141_92016_flag=1_multi=44.0000_len=3519	Lenarviricota	d__Bacteria;p__Myxococcota;c__Polyangia;o__Polyangiales;f__Polyangiaceae;g__JAAFHV01;s__JAAFHV01 sp016720545	34	0	1.65e-09
100671754	SRR11648176|k141_298601_flag=1_multi=36.0000_len=3120	Kitrinoviricota	d__Bacteria;p__Myxococcota;c__Polyangia;o__Polyangiales;f__Polyangiaceae;g__JAAFHV01;s__JAAFHV01 sp016720545	47	2	2.11e-13
100671754	BC-0345298860|k141_3179	Lenarviricota	d__Bacteria;p__Myxococcota;c__Polyangia;o__Polyangiales;f__Polyangiaceae;g__JAAFHV01;s__JAAFHV01 sp016720545	42	1	2.73e-12
100671754	SRR10849374|k141_218357_flag=1_multi=12.0000_len=3750	Lenarviricota	d__Bacteria;p__Myxococcota;c__Polyangia;o__Polyangiales;f__Polyangiaceae;g__JAAFHV01;s__JAAFHV01 sp016720545	37	1	1.65e-09
100671754	SRR17497049|k141_87067_flag=1_multi=464.0000_len=3624	Lenarviricota	d__Bacteria;p__Myxococcota;c__Polyangia;o__Polyangiales;f__Polyangiaceae;g__JAAFHV01;s__JAAFHV01 sp016720545	31	2	0.000166
100671754	SRR17509979|k141_54497_flag=1_multi=434.0000_len=1853	Pisuviricota	d__Bacteria;p__Myxococcota;c__Polyangia;o__Polyangiales;f__Polyangiaceae;g__JAAFHV01;s__JAAFHV01 sp016720545	39	0	2.73e-12
100671754	SRR17481242|k141_14860_flag=1_multi=140.0000_len=3974	Unclassified	d__Bacteria;p__Myxococcota;c__Polyangia;o__Polyangiales;f__Polyangiaceae;g__JAAFHV01;s__JAAFHV01 sp016720545	39	0	2.73e-12
100671754	SRR17509979|k141_53443_flag=1_multi=169.8080_len=4630	Kitrinoviricota	d__Bacteria;p__Myxococcota;c__Polyangia;o__Polyangiales;f__Polyangiaceae;g__JAAFHV01;s__JAAFHV01 sp016720545	39	0	2.73e-12
100671754	SRR17509979|k141_52575_flag=1_multi=83.6741_len=1804	Pisuviricota	d__Bacteria;p__Myxococcota;c__Polyangia;o__Polyangiales;f__Polyangiaceae;g__JAAFHV01;s__JAAFHV01 sp016720545	39	0	2.73e-12
100671754	SRR17509978|k141_111246_flag=1_multi=25.3407_len=1855	Pisuviricota	d__Bacteria;p__Myxococcota;c__Polyangia;o__Polyangiales;f__Polyangiaceae;g__JAAFHV01;s__JAAFHV01 sp016720545	39	0	2.73e-12
100671754	SRR17509940|k141_117101_flag=1_multi=38.0000_len=2457	Duplornaviricota	d__Bacteria;p__Myxococcota;c__Polyangia;o__Polyangiales;f__Polyangiaceae;g__JAAFHV01;s__JAAFHV01 sp016720545	30	1	1.28e-05
100671754	SRR17509976|k141_164083_flag=1_multi=58.0000_len=4337	Pisuviricota	d__Bacteria;p__Myxococcota;c__Polyangia;o__Polyangiales;f__Polyangiaceae;g__JAAFHV01;s__JAAFHV01 sp016720545	34	2	3.56e-06
100671754	SRR11450579|k141_22903_flag=1_multi=93.0000_len=8250	Pisuviricota	d__Bacteria;p__Myxococcota;c__Polyangia;o__Polyangiales;f__Polyangiaceae;g__JAAFHV01;s__JAAFHV01 sp016720545	27	0	1.28e-05
100671754	SRR17497068|k141_144847_flag=1_multi=37.7881_len=1816	Pisuviricota	d__Bacteria;p__Myxococcota;c__Polyangia;o__Polyangiales;f__Polyangiaceae;g__JAAFHV01;s__JAAFHV01 sp016720545	42	1	2.73e-12
100671754	SRR11829331|k141_332492_flag=1_multi=252.0000_len=4351	Lenarviricota	d__Bacteria;p__Myxococcota;c__Polyangia;o__Polyangiales;f__Polyangiaceae;g__JAAFHV01;s__JAAFHV01 sp016720545	39	0	2.73e-12
100671754	SRR17509979|k141_28799_flag=1_multi=182.0000_len=1917	Pisuviricota	d__Bacteria;p__Myxococcota;c__Polyangia;o__Polyangiales;f__Polyangiaceae;g__JAAFHV01;s__JAAFHV01 sp016720545	42	1	2.73e-12
100671754	SRR10849744|k141_310535_flag=1_multi=101.0000_len=3955	Lenarviricota	d__Bacteria;p__Myxococcota;c__Polyangia;o__Polyangiales;f__Polyangiaceae;g__JAAFHV01;s__JAAFHV01 sp016720545	41	1	9.84e-12
100671754	SRR17497064|k141_135790_flag=1_multi=52.0000_len=1739	Pisuviricota	d__Bacteria;p__Myxococcota;c__Polyangia;o__Polyangiales;f__Polyangiaceae;g__JAAFHV01;s__JAAFHV01 sp016720545	39	0	2.73e-12
100671754	SRR17497126|k141_68629_flag=1_multi=6.0000_len=1048	Pisuviricota	d__Bacteria;p__Myxococcota;c__Polyangia;o__Polyangiales;f__Polyangiaceae;g__JAAFHV01;s__JAAFHV01 sp016720545	24	0	0.000596
100671754	SRR17497104|k141_42863_flag=1_multi=4.0000_len=1013	Lenarviricota	d__Bacteria;p__Myxococcota;c__Polyangia;o__Polyangiales;f__Polyangiaceae;g__JAAFHV01;s__JAAFHV01 sp016720545	28	1	0.000166
100671754	SRR17497092|k141_33398_flag=1_multi=217.0121_len=1878	Pisuviricota	d__Bacteria;p__Myxococcota;c__Polyangia;o__Polyangiales;f__Polyangiaceae;g__JAAFHV01;s__JAAFHV01 sp016720545	39	0	2.73e-12
100671754	SRR17509967|k141_44924_flag=1_multi=7.0000_len=2320	Pisuviricota	d__Bacteria;p__Myxococcota;c__Polyangia;o__Polyangiales;f__Polyangiaceae;g__JAAFHV01;s__JAAFHV01 sp016720545	39	3	2.75e-07
100671754	SRR18771403|k141_131354_flag=1_multi=48.8407_len=10690	Pisuviricota	d__Bacteria;p__Myxococcota;c__Polyangia;o__Polyangiales;f__Polyangiaceae;g__JAAFHV01;s__JAAFHV01 sp016720545	42	1	2.73e-12
100671754	SRR17509977|k141_137261_flag=1_multi=15.0000_len=2450	Kitrinoviricota	d__Bacteria;p__Myxococcota;c__Polyangia;o__Polyangiales;f__Polyangiaceae;g__JAAFHV01;s__JAAFHV01 sp016720545	34	2	3.56e-06
100671754	SRR11565437|k141_190787_flag=1_multi=8.0000_len=2964	Kitrinoviricota	d__Bacteria;p__Myxococcota;c__Polyangia;o__Polyangiales;f__Polyangiaceae;g__JAAFHV01;s__JAAFHV01 sp016720545	44	5	9.91e-07
100671754	SRR14530880|k119_2620_flag=1_multi=62.0000_len=4380	Kitrinoviricota	d__Bacteria;p__Myxococcota;c__Polyangia;o__Polyangiales;f__Polyangiaceae;g__JAAFHV01;s__JAAFHV01 sp016720545	41	0	3.54e-11
100671754	SRR17509979|k141_40329_flag=1_multi=17.0000_len=1013	Pisuviricota	d__Bacteria;p__Myxococcota;c__Polyangia;o__Polyangiales;f__Polyangiaceae;g__JAAFHV01;s__JAAFHV01 sp016720545	35	3	4.61e-05
100671754	SRR17497054|k141_191824_flag=1_multi=13.0000_len=2259	Pisuviricota	d__Bacteria;p__Myxococcota;c__Polyangia;o__Polyangiales;f__Polyangiaceae;g__JAAFHV01;s__JAAFHV01 sp016720545	39	0	2.73e-12
100671754	SRR11648360|k141_236875_flag=1_multi=13.0000_len=4864	urv.p.001	d__Bacteria;p__Myxococcota;c__Polyangia;o__Polyangiales;f__Polyangiaceae;g__JAAFHV01;s__JAAFHV01 sp016720545	29	0	9.91e-07
100671754	SRR17509979|k141_62709_flag=1_multi=44.0000_len=2751	Pisuviricota	d__Bacteria;p__Myxococcota;c__Polyangia;o__Polyangiales;f__Polyangiaceae;g__JAAFHV01;s__JAAFHV01 sp016720545	40	0	1.27e-10
100671754	SRR17497069|k141_154292_flag=1_multi=166.0000_len=1714	Pisuviricota	d__Bacteria;p__Myxococcota;c__Polyangia;o__Polyangiales;f__Polyangiaceae;g__JAAFHV01;s__JAAFHV01 sp016720545	42	1	3.56e-06
100671754	SRR17497098|k141_13697_flag=1_multi=34.0000_len=1851	Pisuviricota	d__Bacteria;p__Myxococcota;c__Polyangia;o__Polyangiales;f__Polyangiaceae;g__JAAFHV01;s__JAAFHV01 sp016720545	34	0	1.65e-09
100671754	BC-0332570062|k141_61782	Lenarviricota	d__Bacteria;p__Myxococcota;c__Polyangia;o__Polyangiales;f__Polyangiaceae;g__JAAFHV01;s__JAAFHV01 sp016720545	33	0	5.92e-09
100671754	SRR5829964|k141_20917_flag=1_multi=123.0000_len=1791	Kitrinoviricota	d__Bacteria;p__Myxococcota;c__Polyangia;o__Polyangiales;f__Polyangiaceae;g__JAAFHV01;s__JAAFHV01 sp016720545	31	2	0.000166
100671754	SRR17509977|k141_51278_flag=1_multi=666.0000_len=6190	Pisuviricota	d__Bacteria;p__Myxococcota;c__Polyangia;o__Polyangiales;f__Polyangiaceae;g__JAAFHV01;s__JAAFHV01 sp016720545	39	2	5.92e-09
100671754	SRR17509978|k141_113185_flag=1_multi=9.0000_len=1199	Pisuviricota	d__Bacteria;p__Myxococcota;c__Polyangia;o__Polyangiales;f__Polyangiaceae;g__JAAFHV01;s__JAAFHV01 sp016720545	42	5	1.28e-05
100671754	SRR17497126|k141_95757_flag=1_multi=826.0000_len=3116	Lenarviricota	d__Bacteria;p__Myxococcota;c__Polyangia;o__Polyangiales;f__Polyangiaceae;g__JAAFHV01;s__JAAFHV01 sp016720545	41	3	2.13e-08
100671754	SRR11828805|k141_11533_flag=1_multi=89.8329_len=3648	Kitrinoviricota	d__Bacteria;p__Myxococcota;c__Polyangia;o__Polyangiales;f__Polyangiaceae;g__JAAFHV01;s__JAAFHV01 sp016720545	44	2	1.65e-09
100671754	SRR17509940|k141_147462_flag=1_multi=29.0000_len=3674	Unclassified	d__Bacteria;p__Myxococcota;c__Polyangia;o__Polyangiales;f__Polyangiaceae;g__JAAFHV01;s__JAAFHV01 sp016720545	46	5	7.66e-08
100671754	SRR17497064|k141_128537_flag=1_multi=9.0000_len=1004	Pisuviricota	d__Bacteria;p__Myxococcota;c__Polyangia;o__Polyangiales;f__Polyangiaceae;g__JAAFHV01;s__JAAFHV01 sp016720545	31	1	3.56e-06
100671754	SRR17509977|k141_156580_flag=1_multi=3.0000_len=1406	Pisuviricota	d__Bacteria;p__Myxococcota;c__Polyangia;o__Polyangiales;f__Polyangiaceae;g__JAAFHV01;s__JAAFHV01 sp016720545	36	2	2.75e-07
100671754	SRR18770931|k141_53716_flag=1_multi=6.0000_len=1000	Lenarviricota	d__Bacteria;p__Myxococcota;c__Polyangia;o__Polyangiales;f__Polyangiaceae;g__JAAFHV01;s__JAAFHV01 sp016720545	38	3	9.91e-07
100671754	SRR17509979|k141_11840_flag=1_multi=73.0000_len=1384	Pisuviricota	d__Bacteria;p__Myxococcota;c__Polyangia;o__Polyangiales;f__Polyangiaceae;g__JAAFHV01;s__JAAFHV01 sp016720545	32	2	4.61e-05
100671755	SRR17509979|k141_62709_flag=1_multi=44.0000_len=2751	Pisuviricota	d__Bacteria;p__Myxococcota;c__Polyangia;o__Polyangiales;f__Polyangiaceae;g__JAAFHV01;s__JAAFHV01 sp016720545	37	1	1.24e-07
100671755	SRR18770931|k141_53716_flag=1_multi=6.0000_len=1000	Lenarviricota	d__Bacteria;p__Myxococcota;c__Polyangia;o__Polyangiales;f__Polyangiaceae;g__JAAFHV01;s__JAAFHV01 sp016720545	37	2	0.000267
100671755	SRR17509967|k141_44924_flag=1_multi=7.0000_len=2320	Pisuviricota	d__Bacteria;p__Myxococcota;c__Polyangia;o__Polyangiales;f__Polyangiaceae;g__JAAFHV01;s__JAAFHV01 sp016720545	31	1	0.000267
100671755	SRR17509977|k141_137261_flag=1_multi=15.0000_len=2450	Kitrinoviricota	d__Bacteria;p__Myxococcota;c__Polyangia;o__Polyangiales;f__Polyangiaceae;g__JAAFHV01;s__JAAFHV01 sp016720545	34	2	0.000267
100671755	SRR17497126|k141_68629_flag=1_multi=6.0000_len=1048	Pisuviricota	d__Bacteria;p__Myxococcota;c__Polyangia;o__Polyangiales;f__Polyangiaceae;g__JAAFHV01;s__JAAFHV01 sp016720545	23	0	0.001
100671755	SRR10849744|k141_310535_flag=1_multi=101.0000_len=3955	Lenarviricota	d__Bacteria;p__Myxococcota;c__Polyangia;o__Polyangiales;f__Polyangiaceae;g__JAAFHV01;s__JAAFHV01 sp016720545	38	1	2.05e-10
100671755	SRR17509940|k141_117101_flag=1_multi=38.0000_len=2457	Duplornaviricota	d__Bacteria;p__Myxococcota;c__Polyangia;o__Polyangiales;f__Polyangiaceae;g__JAAFHV01;s__JAAFHV01 sp016720545	28	0	0.000267
100671755	SRR17509978|k141_111246_flag=1_multi=25.3407_len=1855	Pisuviricota	d__Bacteria;p__Myxococcota;c__Polyangia;o__Polyangiales;f__Polyangiaceae;g__JAAFHV01;s__JAAFHV01 sp016720545	38	2	9.55e-09
100671755	SRR11828805|k141_11533_flag=1_multi=89.8329_len=3648	Kitrinoviricota	d__Bacteria;p__Myxococcota;c__Polyangia;o__Polyangiales;f__Polyangiaceae;g__JAAFHV01;s__JAAFHV01 sp016720545	39	2	4.44e-07
100671755	SRR17509979|k141_17026_flag=1_multi=263.6760_len=2576	Lenarviricota	d__Bacteria;p__Myxococcota;c__Polyangia;o__Polyangiales;f__Polyangiaceae;g__JAAFHV01;s__JAAFHV01 sp016720545	33	2	0.001
100671755	SRR17509940|k141_147462_flag=1_multi=29.0000_len=3674	Unclassified	d__Bacteria;p__Myxococcota;c__Polyangia;o__Polyangiales;f__Polyangiaceae;g__JAAFHV01;s__JAAFHV01 sp016720545	37	1	5.75e-06
100671755	SRR17481242|k141_14860_flag=1_multi=140.0000_len=3974	Unclassified	d__Bacteria;p__Myxococcota;c__Polyangia;o__Polyangiales;f__Polyangiaceae;g__JAAFHV01;s__JAAFHV01 sp016720545	38	2	9.55e-09
100671755	SRR17509978|k141_113185_flag=1_multi=9.0000_len=1199	Pisuviricota	d__Bacteria;p__Myxococcota;c__Polyangia;o__Polyangiales;f__Polyangiaceae;g__JAAFHV01;s__JAAFHV01 sp016720545	33	3	0.000267
100671755	SRR17481244|k141_92016_flag=1_multi=44.0000_len=3519	Lenarviricota	d__Bacteria;p__Myxococcota;c__Polyangia;o__Polyangiales;f__Polyangiaceae;g__JAAFHV01;s__JAAFHV01 sp016720545	33	1	1.24e-07
100671755	SRR11450579|k141_22903_flag=1_multi=93.0000_len=8250	Pisuviricota	d__Bacteria;p__Myxococcota;c__Polyangia;o__Polyangiales;f__Polyangiaceae;g__JAAFHV01;s__JAAFHV01 sp016720545	28	0	0.000267
100671755	BC-0345298860|k141_3179	Lenarviricota	d__Bacteria;p__Myxococcota;c__Polyangia;o__Polyangiales;f__Polyangiaceae;g__JAAFHV01;s__JAAFHV01 sp016720545	38	2	9.55e-09
100671755	SRR11648360|k141_236875_flag=1_multi=13.0000_len=4864	urv.p.001	d__Bacteria;p__Myxococcota;c__Polyangia;o__Polyangiales;f__Polyangiaceae;g__JAAFHV01;s__JAAFHV01 sp016720545	31	0	5.75e-06
100671755	SRR17497092|k141_33398_flag=1_multi=217.0121_len=1878	Pisuviricota	d__Bacteria;p__Myxococcota;c__Polyangia;o__Polyangiales;f__Polyangiaceae;g__JAAFHV01;s__JAAFHV01 sp016720545	38	2	9.55e-09
100671755	SRR17497098|k141_13697_flag=1_multi=34.0000_len=1851	Pisuviricota	d__Bacteria;p__Myxococcota;c__Polyangia;o__Polyangiales;f__Polyangiaceae;g__JAAFHV01;s__JAAFHV01 sp016720545	33	1	1.24e-07
100671755	SRR17497049|k141_87067_flag=1_multi=464.0000_len=3624	Lenarviricota	d__Bacteria;p__Myxococcota;c__Polyangia;o__Polyangiales;f__Polyangiaceae;g__JAAFHV01;s__JAAFHV01 sp016720545	23	0	0.001
100671755	SRR17509979|k141_40329_flag=1_multi=17.0000_len=1013	Pisuviricota	d__Bacteria;p__Myxococcota;c__Polyangia;o__Polyangiales;f__Polyangiaceae;g__JAAFHV01;s__JAAFHV01 sp016720545	30	1	0.001
100671755	SRR17509979|k141_53443_flag=1_multi=169.8080_len=4630	Kitrinoviricota	d__Bacteria;p__Myxococcota;c__Polyangia;o__Polyangiales;f__Polyangiaceae;g__JAAFHV01;s__JAAFHV01 sp016720545	38	2	9.55e-09
100671755	SRR17497064|k141_128537_flag=1_multi=9.0000_len=1004	Pisuviricota	d__Bacteria;p__Myxococcota;c__Polyangia;o__Polyangiales;f__Polyangiaceae;g__JAAFHV01;s__JAAFHV01 sp016720545	32	1	7.43e-05
100671755	SRR17509979|k141_54497_flag=1_multi=434.0000_len=1853	Pisuviricota	d__Bacteria;p__Myxococcota;c__Polyangia;o__Polyangiales;f__Polyangiaceae;g__JAAFHV01;s__JAAFHV01 sp016720545	38	2	9.55e-09
100671755	SRR17497126|k141_132965_flag=1_multi=75.0000_len=1737	Pisuviricota	d__Bacteria;p__Myxococcota;c__Polyangia;o__Polyangiales;f__Polyangiaceae;g__JAAFHV01;s__JAAFHV01 sp016720545	23	0	0.001
100671755	SRR17497068|k141_144847_flag=1_multi=37.7881_len=1816	Pisuviricota	d__Bacteria;p__Myxococcota;c__Polyangia;o__Polyangiales;f__Polyangiaceae;g__JAAFHV01;s__JAAFHV01 sp016720545	38	2	9.55e-09
100671755	SRR17509979|k141_28799_flag=1_multi=182.0000_len=1917	Pisuviricota	d__Bacteria;p__Myxococcota;c__Polyangia;o__Polyangiales;f__Polyangiaceae;g__JAAFHV01;s__JAAFHV01 sp016720545	38	2	9.55e-09
100671755	SRR17497054|k141_191824_flag=1_multi=13.0000_len=2259	Pisuviricota	d__Bacteria;p__Myxococcota;c__Polyangia;o__Polyangiales;f__Polyangiaceae;g__JAAFHV01;s__JAAFHV01 sp016720545	38	2	9.55e-09
100671755	BC-0332570062|k141_61782	Lenarviricota	d__Bacteria;p__Myxococcota;c__Polyangia;o__Polyangiales;f__Polyangiaceae;g__JAAFHV01;s__JAAFHV01 sp016720545	33	1	1.24e-07
100671755	SRR17497069|k141_154292_flag=1_multi=166.0000_len=1714	Pisuviricota	d__Bacteria;p__Myxococcota;c__Polyangia;o__Polyangiales;f__Polyangiaceae;g__JAAFHV01;s__JAAFHV01 sp016720545	32	1	7.43e-05
100671755	SRR17497099|k141_59590_flag=1_multi=17.5683_len=1158	Pisuviricota	d__Bacteria;p__Myxococcota;c__Polyangia;o__Polyangiales;f__Polyangiaceae;g__JAAFHV01;s__JAAFHV01 sp016720545	25	0	7.43e-05
100671755	SRR17497064|k141_135790_flag=1_multi=52.0000_len=1739	Pisuviricota	d__Bacteria;p__Myxococcota;c__Polyangia;o__Polyangiales;f__Polyangiaceae;g__JAAFHV01;s__JAAFHV01 sp016720545	38	2	9.55e-09
100671755	SRR14530880|k119_2620_flag=1_multi=62.0000_len=4380	Kitrinoviricota	d__Bacteria;p__Myxococcota;c__Polyangia;o__Polyangiales;f__Polyangiaceae;g__JAAFHV01;s__JAAFHV01 sp016720545	42	1	9.55e-09
100671755	SRR17509977|k141_156580_flag=1_multi=3.0000_len=1406	Pisuviricota	d__Bacteria;p__Myxococcota;c__Polyangia;o__Polyangiales;f__Polyangiaceae;g__JAAFHV01;s__JAAFHV01 sp016720545	35	2	4.44e-07
100671755	SRR11565437|k141_190787_flag=1_multi=8.0000_len=2964	Kitrinoviricota	d__Bacteria;p__Myxococcota;c__Polyangia;o__Polyangiales;f__Polyangiaceae;g__JAAFHV01;s__JAAFHV01 sp016720545	27	0	5.75e-06
100671755	SRR10849374|k141_218357_flag=1_multi=12.0000_len=3750	Lenarviricota	d__Bacteria;p__Myxococcota;c__Polyangia;o__Polyangiales;f__Polyangiaceae;g__JAAFHV01;s__JAAFHV01 sp016720545	33	1	1.24e-07
100671755	SRR17509977|k141_51278_flag=1_multi=666.0000_len=6190	Pisuviricota	d__Bacteria;p__Myxococcota;c__Polyangia;o__Polyangiales;f__Polyangiaceae;g__JAAFHV01;s__JAAFHV01 sp016720545	38	1	1.6e-06
100671755	SRR17509979|k141_52575_flag=1_multi=83.6741_len=1804	Pisuviricota	d__Bacteria;p__Myxococcota;c__Polyangia;o__Polyangiales;f__Polyangiaceae;g__JAAFHV01;s__JAAFHV01 sp016720545	38	2	9.55e-09
100671755	SRR11648176|k141_298601_flag=1_multi=36.0000_len=3120	Kitrinoviricota	d__Bacteria;p__Myxococcota;c__Polyangia;o__Polyangiales;f__Polyangiaceae;g__JAAFHV01;s__JAAFHV01 sp016720545	49	5	7.38e-10
100671755	SRR11829331|k141_332492_flag=1_multi=252.0000_len=4351	Lenarviricota	d__Bacteria;p__Myxococcota;c__Polyangia;o__Polyangiales;f__Polyangiaceae;g__JAAFHV01;s__JAAFHV01 sp016720545	38	2	9.55e-09
100671755	SRR12685024|k141_131206_flag=1_multi=12.0000_len=3956	Pisuviricota	d__Bacteria;p__Myxococcota;c__Polyangia;o__Polyangiales;f__Polyangiaceae;g__JAAFHV01;s__JAAFHV01 sp016720545	31	1	0.000267
100671755	SRR18771403|k141_131354_flag=1_multi=48.8407_len=10690	Pisuviricota	d__Bacteria;p__Myxococcota;c__Polyangia;o__Polyangiales;f__Polyangiaceae;g__JAAFHV01;s__JAAFHV01 sp016720545	38	2	9.55e-09
100671756	SRR17509979|k141_40329_flag=1_multi=17.0000_len=1013	Pisuviricota	d__Bacteria;p__Myxococcota;c__Polyangia;o__Polyangiales;f__Polyangiaceae;g__JAAFHV01;s__JAAFHV01 sp016720545	29	1	2.86e-05
100671756	SRR18770931|k141_53716_flag=1_multi=6.0000_len=1000	Lenarviricota	d__Bacteria;p__Myxococcota;c__Polyangia;o__Polyangiales;f__Polyangiaceae;g__JAAFHV01;s__JAAFHV01 sp016720545	38	3	6.15e-07
100671756	SRR11450579|k141_22903_flag=1_multi=93.0000_len=8250	Pisuviricota	d__Bacteria;p__Myxococcota;c__Polyangia;o__Polyangiales;f__Polyangiaceae;g__JAAFHV01;s__JAAFHV01 sp016720545	28	0	2.21e-06
100671756	BC-0345298860|k141_3179	Lenarviricota	d__Bacteria;p__Myxococcota;c__Polyangia;o__Polyangiales;f__Polyangiaceae;g__JAAFHV01;s__JAAFHV01 sp016720545	51	0	3.62e-19
100671756	SRR11828805|k141_11533_flag=1_multi=89.8329_len=3648	Kitrinoviricota	d__Bacteria;p__Myxococcota;c__Polyangia;o__Polyangiales;f__Polyangiaceae;g__JAAFHV01;s__JAAFHV01 sp016720545	46	2	4.72e-13
100671756	SRR17497064|k141_128537_flag=1_multi=9.0000_len=1004	Pisuviricota	d__Bacteria;p__Myxococcota;c__Polyangia;o__Polyangiales;f__Polyangiaceae;g__JAAFHV01;s__JAAFHV01 sp016720545	31	1	2.21e-06
100671756	SRR18771403|k141_131354_flag=1_multi=48.8407_len=10690	Pisuviricota	d__Bacteria;p__Myxococcota;c__Polyangia;o__Polyangiales;f__Polyangiaceae;g__JAAFHV01;s__JAAFHV01 sp016720545	51	0	3.62e-19
100671756	SRR17509979|k141_28799_flag=1_multi=182.0000_len=1917	Pisuviricota	d__Bacteria;p__Myxococcota;c__Polyangia;o__Polyangiales;f__Polyangiaceae;g__JAAFHV01;s__JAAFHV01 sp016720545	49	0	4.69e-18
100671756	SRR17497126|k141_68629_flag=1_multi=6.0000_len=1048	Pisuviricota	d__Bacteria;p__Myxococcota;c__Polyangia;o__Polyangiales;f__Polyangiaceae;g__JAAFHV01;s__JAAFHV01 sp016720545	24	0	0.00037
100671756	SRR11648176|k141_298601_flag=1_multi=36.0000_len=3120	Kitrinoviricota	d__Bacteria;p__Myxococcota;c__Polyangia;o__Polyangiales;f__Polyangiaceae;g__JAAFHV01;s__JAAFHV01 sp016720545	51	0	3.62e-19
100671756	SRR17509979|k141_53443_flag=1_multi=169.8080_len=4630	Kitrinoviricota	d__Bacteria;p__Myxococcota;c__Polyangia;o__Polyangiales;f__Polyangiaceae;g__JAAFHV01;s__JAAFHV01 sp016720545	60	3	3.62e-19
100671756	SRR11648360|k141_236875_flag=1_multi=13.0000_len=4864	urv.p.001	d__Bacteria;p__Myxococcota;c__Polyangia;o__Polyangiales;f__Polyangiaceae;g__JAAFHV01;s__JAAFHV01 sp016720545	28	0	2.21e-06
100671756	SRR11565437|k141_190787_flag=1_multi=8.0000_len=2964	Kitrinoviricota	d__Bacteria;p__Myxococcota;c__Polyangia;o__Polyangiales;f__Polyangiaceae;g__JAAFHV01;s__JAAFHV01 sp016720545	28	1	0.000103
100671756	SRR17509978|k141_111246_flag=1_multi=25.3407_len=1855	Pisuviricota	d__Bacteria;p__Myxococcota;c__Polyangia;o__Polyangiales;f__Polyangiaceae;g__JAAFHV01;s__JAAFHV01 sp016720545	51	3	3.65e-14
100671756	SRR10849374|k141_218357_flag=1_multi=12.0000_len=3750	Lenarviricota	d__Bacteria;p__Myxococcota;c__Polyangia;o__Polyangiales;f__Polyangiaceae;g__JAAFHV01;s__JAAFHV01 sp016720545	34	0	1.02e-09
100671756	SRR17497068|k141_144847_flag=1_multi=37.7881_len=1816	Pisuviricota	d__Bacteria;p__Myxococcota;c__Polyangia;o__Polyangiales;f__Polyangiaceae;g__JAAFHV01;s__JAAFHV01 sp016720545	51	0	3.62e-19
100671756	BC-0332570062|k141_61782	Lenarviricota	d__Bacteria;p__Myxococcota;c__Polyangia;o__Polyangiales;f__Polyangiaceae;g__JAAFHV01;s__JAAFHV01 sp016720545	33	0	3.68e-09
100671756	SRR17481242|k141_14860_flag=1_multi=140.0000_len=3974	Unclassified	d__Bacteria;p__Myxococcota;c__Polyangia;o__Polyangiales;f__Polyangiaceae;g__JAAFHV01;s__JAAFHV01 sp016720545	60	3	3.62e-19
100671756	SRR17497069|k141_154292_flag=1_multi=166.0000_len=1714	Pisuviricota	d__Bacteria;p__Myxococcota;c__Polyangia;o__Polyangiales;f__Polyangiaceae;g__JAAFHV01;s__JAAFHV01 sp016720545	43	4	4.75e-08
100671756	SRR17481244|k141_92016_flag=1_multi=44.0000_len=3519	Lenarviricota	d__Bacteria;p__Myxococcota;c__Polyangia;o__Polyangiales;f__Polyangiaceae;g__JAAFHV01;s__JAAFHV01 sp016720545	34	0	1.02e-09
100671756	SRR10849744|k141_310535_flag=1_multi=101.0000_len=3955	Lenarviricota	d__Bacteria;p__Myxococcota;c__Polyangia;o__Polyangiales;f__Polyangiaceae;g__JAAFHV01;s__JAAFHV01 sp016720545	39	1	7.9e-11
100671756	SRR17497064|k141_135790_flag=1_multi=52.0000_len=1739	Pisuviricota	d__Bacteria;p__Myxococcota;c__Polyangia;o__Polyangiales;f__Polyangiaceae;g__JAAFHV01;s__JAAFHV01 sp016720545	51	0	3.62e-19
100671756	SRR17509940|k141_117101_flag=1_multi=38.0000_len=2457	Duplornaviricota	d__Bacteria;p__Myxococcota;c__Polyangia;o__Polyangiales;f__Polyangiaceae;g__JAAFHV01;s__JAAFHV01 sp016720545	26	0	2.86e-05
100671756	SRR14530880|k119_2620_flag=1_multi=62.0000_len=4380	Kitrinoviricota	d__Bacteria;p__Myxococcota;c__Polyangia;o__Polyangiales;f__Polyangiaceae;g__JAAFHV01;s__JAAFHV01 sp016720545	46	4	1.02e-09
100671756	SRR17497092|k141_33398_flag=1_multi=217.0121_len=1878	Pisuviricota	d__Bacteria;p__Myxococcota;c__Polyangia;o__Polyangiales;f__Polyangiaceae;g__JAAFHV01;s__JAAFHV01 sp016720545	51	0	3.62e-19
100671756	SRR17497054|k141_191824_flag=1_multi=13.0000_len=2259	Pisuviricota	d__Bacteria;p__Myxococcota;c__Polyangia;o__Polyangiales;f__Polyangiaceae;g__JAAFHV01;s__JAAFHV01 sp016720545	52	2	3.65e-14
100671756	SRR17509979|k141_62709_flag=1_multi=44.0000_len=2751	Pisuviricota	d__Bacteria;p__Myxococcota;c__Polyangia;o__Polyangiales;f__Polyangiaceae;g__JAAFHV01;s__JAAFHV01 sp016720545	40	1	2.2e-11
100671756	SRR17497049|k141_87067_flag=1_multi=464.0000_len=3624	Lenarviricota	d__Bacteria;p__Myxococcota;c__Polyangia;o__Polyangiales;f__Polyangiaceae;g__JAAFHV01;s__JAAFHV01 sp016720545	50	7	6.15e-07
100671756	SRR11829331|k141_332492_flag=1_multi=252.0000_len=4351	Lenarviricota	d__Bacteria;p__Myxococcota;c__Polyangia;o__Polyangiales;f__Polyangiaceae;g__JAAFHV01;s__JAAFHV01 sp016720545	60	3	3.62e-19
100671756	SRR17509979|k141_52575_flag=1_multi=83.6741_len=1804	Pisuviricota	d__Bacteria;p__Myxococcota;c__Polyangia;o__Polyangiales;f__Polyangiaceae;g__JAAFHV01;s__JAAFHV01 sp016720545	51	0	3.62e-19
100671756	SRR17509978|k141_113185_flag=1_multi=9.0000_len=1199	Pisuviricota	d__Bacteria;p__Myxococcota;c__Polyangia;o__Polyangiales;f__Polyangiaceae;g__JAAFHV01;s__JAAFHV01 sp016720545	36	3	7.96e-06
100671756	SRR17497098|k141_13697_flag=1_multi=34.0000_len=1851	Pisuviricota	d__Bacteria;p__Myxococcota;c__Polyangia;o__Polyangiales;f__Polyangiaceae;g__JAAFHV01;s__JAAFHV01 sp016720545	56	0	6.11e-12
100671756	SRR17509976|k141_164083_flag=1_multi=58.0000_len=4337	Pisuviricota	d__Bacteria;p__Myxococcota;c__Polyangia;o__Polyangiales;f__Polyangiaceae;g__JAAFHV01;s__JAAFHV01 sp016720545	34	2	2.21e-06
100671756	SRR17509967|k141_44924_flag=1_multi=7.0000_len=2320	Pisuviricota	d__Bacteria;p__Myxococcota;c__Polyangia;o__Polyangiales;f__Polyangiaceae;g__JAAFHV01;s__JAAFHV01 sp016720545	39	3	1.71e-07
100671756	SRR17509979|k141_54497_flag=1_multi=434.0000_len=1853	Pisuviricota	d__Bacteria;p__Myxococcota;c__Polyangia;o__Polyangiales;f__Polyangiaceae;g__JAAFHV01;s__JAAFHV01 sp016720545	60	3	3.62e-19
100671756	SRR17509977|k141_51278_flag=1_multi=666.0000_len=6190	Pisuviricota	d__Bacteria;p__Myxococcota;c__Polyangia;o__Polyangiales;f__Polyangiaceae;g__JAAFHV01;s__JAAFHV01 sp016720545	39	2	3.68e-09
100671756	SRR17497126|k141_95757_flag=1_multi=826.0000_len=3116	Lenarviricota	d__Bacteria;p__Myxococcota;c__Polyangia;o__Polyangiales;f__Polyangiaceae;g__JAAFHV01;s__JAAFHV01 sp016720545	41	3	1.32e-08
100671756	SRR17509976|k141_100049_flag=1_multi=72.0000_len=1862	Pisuviricota	d__Bacteria;p__Myxococcota;c__Polyangia;o__Polyangiales;f__Polyangiaceae;g__JAAFHV01;s__JAAFHV01 sp016720545	43	4	4.75e-08
100671756	SRR17509977|k141_137261_flag=1_multi=15.0000_len=2450	Kitrinoviricota	d__Bacteria;p__Myxococcota;c__Polyangia;o__Polyangiales;f__Polyangiaceae;g__JAAFHV01;s__JAAFHV01 sp016720545	34	2	2.21e-06
100671756	SRR17481244|k141_53629_flag=1_multi=27.0000_len=3662	Lenarviricota	d__Bacteria;p__Myxococcota;c__Polyangia;o__Polyangiales;f__Polyangiaceae;g__JAAFHV01;s__JAAFHV01 sp016720545	41	2	2.84e-10
100671759	SRR11829331|k141_332492_flag=1_multi=252.0000_len=4351	Lenarviricota	d__Bacteria;p__Myxococcota;c__Polyangia;o__Polyangiales;f__Polyangiaceae;g__JAAFHV01;s__JAAFHV01 sp016720545	32	0	6.61e-09
100671759	SRR11565437|k141_190787_flag=1_multi=8.0000_len=2964	Kitrinoviricota	d__Bacteria;p__Myxococcota;c__Polyangia;o__Polyangiales;f__Polyangiaceae;g__JAAFHV01;s__JAAFHV01 sp016720545	28	1	5.15e-05
100671759	SRR17497064|k141_135790_flag=1_multi=52.0000_len=1739	Pisuviricota	d__Bacteria;p__Myxococcota;c__Polyangia;o__Polyangiales;f__Polyangiaceae;g__JAAFHV01;s__JAAFHV01 sp016720545	32	0	6.61e-09
100671759	SRR11648176|k141_298601_flag=1_multi=36.0000_len=3120	Kitrinoviricota	d__Bacteria;p__Myxococcota;c__Polyangia;o__Polyangiales;f__Polyangiaceae;g__JAAFHV01;s__JAAFHV01 sp016720545	33	0	1.84e-09
100671759	SRR18771403|k141_131354_flag=1_multi=48.8407_len=10690	Pisuviricota	d__Bacteria;p__Myxococcota;c__Polyangia;o__Polyangiales;f__Polyangiaceae;g__JAAFHV01;s__JAAFHV01 sp016720545	32	0	6.61e-09
100671759	SRR17509979|k141_28799_flag=1_multi=182.0000_len=1917	Pisuviricota	d__Bacteria;p__Myxococcota;c__Polyangia;o__Polyangiales;f__Polyangiaceae;g__JAAFHV01;s__JAAFHV01 sp016720545	32	0	6.61e-09
100671759	SRR17497054|k141_191824_flag=1_multi=13.0000_len=2259	Pisuviricota	d__Bacteria;p__Myxococcota;c__Polyangia;o__Polyangiales;f__Polyangiaceae;g__JAAFHV01;s__JAAFHV01 sp016720545	32	0	6.61e-09
100671759	BC-0345298860|k141_3179	Lenarviricota	d__Bacteria;p__Myxococcota;c__Polyangia;o__Polyangiales;f__Polyangiaceae;g__JAAFHV01;s__JAAFHV01 sp016720545	32	0	6.61e-09
100671759	SRR17481242|k141_14860_flag=1_multi=140.0000_len=3974	Unclassified	d__Bacteria;p__Myxococcota;c__Polyangia;o__Polyangiales;f__Polyangiaceae;g__JAAFHV01;s__JAAFHV01 sp016720545	32	0	6.61e-09
100671759	SRR17509979|k141_52575_flag=1_multi=83.6741_len=1804	Pisuviricota	d__Bacteria;p__Myxococcota;c__Polyangia;o__Polyangiales;f__Polyangiaceae;g__JAAFHV01;s__JAAFHV01 sp016720545	32	0	6.61e-09
100671759	SRR17497092|k141_33398_flag=1_multi=217.0121_len=1878	Pisuviricota	d__Bacteria;p__Myxococcota;c__Polyangia;o__Polyangiales;f__Polyangiaceae;g__JAAFHV01;s__JAAFHV01 sp016720545	32	0	6.61e-09
100671759	SRR17509979|k141_53443_flag=1_multi=169.8080_len=4630	Kitrinoviricota	d__Bacteria;p__Myxococcota;c__Polyangia;o__Polyangiales;f__Polyangiaceae;g__JAAFHV01;s__JAAFHV01 sp016720545	32	0	6.61e-09
100671759	SRR17509979|k141_40329_flag=1_multi=17.0000_len=1013	Pisuviricota	d__Bacteria;p__Myxococcota;c__Polyangia;o__Polyangiales;f__Polyangiaceae;g__JAAFHV01;s__JAAFHV01 sp016720545	32	2	1.43e-05
100671759	SRR17509967|k141_44924_flag=1_multi=7.0000_len=2320	Pisuviricota	d__Bacteria;p__Myxococcota;c__Polyangia;o__Polyangiales;f__Polyangiaceae;g__JAAFHV01;s__JAAFHV01 sp016720545	30	1	3.98e-06
100671759	SRR10849374|k141_218357_flag=1_multi=12.0000_len=3750	Lenarviricota	d__Bacteria;p__Myxococcota;c__Polyangia;o__Polyangiales;f__Polyangiaceae;g__JAAFHV01;s__JAAFHV01 sp016720545	32	0	6.61e-09
100671759	SRR11828805|k141_11533_flag=1_multi=89.8329_len=3648	Kitrinoviricota	d__Bacteria;p__Myxococcota;c__Polyangia;o__Polyangiales;f__Polyangiaceae;g__JAAFHV01;s__JAAFHV01 sp016720545	34	0	8.55e-08
100671759	SRR11648360|k141_236875_flag=1_multi=13.0000_len=4864	urv.p.001	d__Bacteria;p__Myxococcota;c__Polyangia;o__Polyangiales;f__Polyangiaceae;g__JAAFHV01;s__JAAFHV01 sp016720545	29	0	3.08e-07
100671759	SRR17497126|k141_132965_flag=1_multi=75.0000_len=1737	Pisuviricota	d__Bacteria;p__Myxococcota;c__Polyangia;o__Polyangiales;f__Polyangiaceae;g__JAAFHV01;s__JAAFHV01 sp016720545	23	0	0.000666
100671759	SRR17509979|k141_48627_flag=1_multi=74.6250_len=1645	Pisuviricota	d__Bacteria;p__Myxococcota;c__Polyangia;o__Polyangiales;f__Polyangiaceae;g__JAAFHV01;s__JAAFHV01 sp016720545	26	1	0.000666
100671759	SRR17497068|k141_144847_flag=1_multi=37.7881_len=1816	Pisuviricota	d__Bacteria;p__Myxococcota;c__Polyangia;o__Polyangiales;f__Polyangiaceae;g__JAAFHV01;s__JAAFHV01 sp016720545	32	0	6.61e-09
100671759	SRR17509979|k141_54497_flag=1_multi=434.0000_len=1853	Pisuviricota	d__Bacteria;p__Myxococcota;c__Polyangia;o__Polyangiales;f__Polyangiaceae;g__JAAFHV01;s__JAAFHV01 sp016720545	32	0	6.61e-09
100671759	SRR17509978|k141_111246_flag=1_multi=25.3407_len=1855	Pisuviricota	d__Bacteria;p__Myxococcota;c__Polyangia;o__Polyangiales;f__Polyangiaceae;g__JAAFHV01;s__JAAFHV01 sp016720545	32	0	6.61e-09
100671759	SRR17497049|k141_87067_flag=1_multi=464.0000_len=3624	Lenarviricota	d__Bacteria;p__Myxococcota;c__Polyangia;o__Polyangiales;f__Polyangiaceae;g__JAAFHV01;s__JAAFHV01 sp016720545	24	0	0.000185
100671759	SRR17509979|k141_62709_flag=1_multi=44.0000_len=2751	Pisuviricota	d__Bacteria;p__Myxococcota;c__Polyangia;o__Polyangiales;f__Polyangiaceae;g__JAAFHV01;s__JAAFHV01 sp016720545	33	0	3.08e-07
100671759	SRR17509979|k141_16339_flag=1_multi=584.0000_len=1694	Pisuviricota	d__Bacteria;p__Myxococcota;c__Polyangia;o__Polyangiales;f__Polyangiaceae;g__JAAFHV01;s__JAAFHV01 sp016720545	26	1	0.000666
100671759	SRR17509940|k141_117101_flag=1_multi=38.0000_len=2457	Duplornaviricota	d__Bacteria;p__Myxococcota;c__Polyangia;o__Polyangiales;f__Polyangiaceae;g__JAAFHV01;s__JAAFHV01 sp016720545	27	0	3.98e-06
100671759	SRR17509977|k141_51278_flag=1_multi=666.0000_len=6190	Pisuviricota	d__Bacteria;p__Myxococcota;c__Polyangia;o__Polyangiales;f__Polyangiaceae;g__JAAFHV01;s__JAAFHV01 sp016720545	30	0	8.55e-08
100671759	SRR11450585|k141_260925_flag=1_multi=20.0000_len=6420	Unclassified	d__Bacteria;p__Myxococcota;c__Polyangia;o__Polyangiales;f__Polyangiaceae;g__JAAFHV01;s__JAAFHV01 sp016720545	33	0	3.08e-07
100671759	SRR17481244|k141_92016_flag=1_multi=44.0000_len=3519	Lenarviricota	d__Bacteria;p__Myxococcota;c__Polyangia;o__Polyangiales;f__Polyangiaceae;g__JAAFHV01;s__JAAFHV01 sp016720545	32	0	6.61e-09
100671759	BC-0332570062|k141_61782	Lenarviricota	d__Bacteria;p__Myxococcota;c__Polyangia;o__Polyangiales;f__Polyangiaceae;g__JAAFHV01;s__JAAFHV01 sp016720545	32	0	6.61e-09
100671759	SRR17497098|k141_13697_flag=1_multi=34.0000_len=1851	Pisuviricota	d__Bacteria;p__Myxococcota;c__Polyangia;o__Polyangiales;f__Polyangiaceae;g__JAAFHV01;s__JAAFHV01 sp016720545	32	0	6.61e-09
100671759	SRR17497126|k141_68629_flag=1_multi=6.0000_len=1048	Pisuviricota	d__Bacteria;p__Myxococcota;c__Polyangia;o__Polyangiales;f__Polyangiaceae;g__JAAFHV01;s__JAAFHV01 sp016720545	24	0	0.000185
100671759	SRR17481245|k141_34522_flag=1_multi=17.0000_len=1572	Pisuviricota	d__Bacteria;p__Myxococcota;c__Polyangia;o__Polyangiales;f__Polyangiaceae;g__JAAFHV01;s__JAAFHV01 sp016720545	26	1	0.000666
100671759	SRR11450579|k141_22903_flag=1_multi=93.0000_len=8250	Pisuviricota	d__Bacteria;p__Myxococcota;c__Polyangia;o__Polyangiales;f__Polyangiaceae;g__JAAFHV01;s__JAAFHV01 sp016720545	27	0	3.98e-06
100671759	SRR17509976|k141_100049_flag=1_multi=72.0000_len=1862	Pisuviricota	d__Bacteria;p__Myxococcota;c__Polyangia;o__Polyangiales;f__Polyangiaceae;g__JAAFHV01;s__JAAFHV01 sp016720545	34	0	3.98e-06
100671759	SRR17509977|k141_137261_flag=1_multi=15.0000_len=2450	Kitrinoviricota	d__Bacteria;p__Myxococcota;c__Polyangia;o__Polyangiales;f__Polyangiaceae;g__JAAFHV01;s__JAAFHV01 sp016720545	34	0	3.98e-06
100671759	SRR10849744|k141_310535_flag=1_multi=101.0000_len=3955	Lenarviricota	d__Bacteria;p__Myxococcota;c__Polyangia;o__Polyangiales;f__Polyangiaceae;g__JAAFHV01;s__JAAFHV01 sp016720545	40	2	5.11e-10
100671759	SRR14530880|k119_2620_flag=1_multi=62.0000_len=4380	Kitrinoviricota	d__Bacteria;p__Myxococcota;c__Polyangia;o__Polyangiales;f__Polyangiaceae;g__JAAFHV01;s__JAAFHV01 sp016720545	33	0	1.84e-09
100671759	SRR17497126|k141_95757_flag=1_multi=826.0000_len=3116	Lenarviricota	d__Bacteria;p__Myxococcota;c__Polyangia;o__Polyangiales;f__Polyangiaceae;g__JAAFHV01;s__JAAFHV01 sp016720545	33	0	3.08e-07
100671759	SRR17509978|k141_113185_flag=1_multi=9.0000_len=1199	Pisuviricota	d__Bacteria;p__Myxococcota;c__Polyangia;o__Polyangiales;f__Polyangiaceae;g__JAAFHV01;s__JAAFHV01 sp016720545	33	1	1.43e-05
100671759	SRR17509977|k141_156580_flag=1_multi=3.0000_len=1406	Pisuviricota	d__Bacteria;p__Myxococcota;c__Polyangia;o__Polyangiales;f__Polyangiaceae;g__JAAFHV01;s__JAAFHV01 sp016720545	32	1	3.08e-07
100671759	SRR17481244|k141_53629_flag=1_multi=27.0000_len=3662	Lenarviricota	d__Bacteria;p__Myxococcota;c__Polyangia;o__Polyangiales;f__Polyangiaceae;g__JAAFHV01;s__JAAFHV01 sp016720545	35	0	1.11e-06
100671759	SRR17509979|k141_11840_flag=1_multi=73.0000_len=1384	Pisuviricota	d__Bacteria;p__Myxococcota;c__Polyangia;o__Polyangiales;f__Polyangiaceae;g__JAAFHV01;s__JAAFHV01 sp016720545	32	1	5.15e-05
100671759	SRR17497069|k141_154292_flag=1_multi=166.0000_len=1714	Pisuviricota	d__Bacteria;p__Myxococcota;c__Polyangia;o__Polyangiales;f__Polyangiaceae;g__JAAFHV01;s__JAAFHV01 sp016720545	31	1	1.11e-06
100671759	SRR17509976|k141_164083_flag=1_multi=58.0000_len=4337	Pisuviricota	d__Bacteria;p__Myxococcota;c__Polyangia;o__Polyangiales;f__Polyangiaceae;g__JAAFHV01;s__JAAFHV01 sp016720545	34	0	3.98e-06
100671759	SRR18770931|k141_53716_flag=1_multi=6.0000_len=1000	Lenarviricota	d__Bacteria;p__Myxococcota;c__Polyangia;o__Polyangiales;f__Polyangiaceae;g__JAAFHV01;s__JAAFHV01 sp016720545	34	0	3.98e-06
100671759	SRR17497064|k141_128537_flag=1_multi=9.0000_len=1004	Pisuviricota	d__Bacteria;p__Myxococcota;c__Polyangia;o__Polyangiales;f__Polyangiaceae;g__JAAFHV01;s__JAAFHV01 sp016720545	31	1	1.11e-06
100671759	SRR17497104|k141_42863_flag=1_multi=4.0000_len=1013	Lenarviricota	d__Bacteria;p__Myxococcota;c__Polyangia;o__Polyangiales;f__Polyangiaceae;g__JAAFHV01;s__JAAFHV01 sp016720545	26	1	0.000666
100672147	SRR11829261|k141_152797_flag=1_multi=151.2792_len=2526	Kitrinoviricota	d__Bacteria;p__Firmicutes_A;c__Clostridia;o__Peptostreptococcales;f__Peptostreptococcaceae;g__Clostridioides;s__Clostridioides difficile	25	0	4.29e-05
100673508	SRR11648413|k141_155839_flag=0_multi=32.5524_len=1714	Lenarviricota	d__Bacteria;p__Proteobacteria;c__Gammaproteobacteria;o__Enterobacterales;f__Enterobacteriaceae;g__Salmonella;s__Salmonella enterica	23	0	0.000333
100674176	SRR11828459|k141_18049_flag=1_multi=4.0000_len=1029	Duplornaviricota	d__Bacteria;p__Firmicutes_A;c__Clostridia;o__Peptostreptococcales;f__Peptostreptococcaceae;g__Clostridioides;s__Clostridioides difficile	29	1	1.11e-05
100677117	SRR11828459|k141_18049_flag=1_multi=4.0000_len=1029	Duplornaviricota	d__Bacteria;p__Firmicutes_A;c__Clostridia;o__Peptostreptococcales;f__Peptostreptococcaceae;g__Clostridioides;s__Clostridioides difficile	29	1	1.11e-05
100682142	SRR11829261|k141_152797_flag=1_multi=151.2792_len=2526	Kitrinoviricota	d__Bacteria;p__Firmicutes_A;c__Clostridia;o__Peptostreptococcales;f__Peptostreptococcaceae;g__Clostridioides;s__Clostridioides difficile	25	0	4.29e-05
100686729	SRR11076227|k141_564324_flag=1_multi=26.0000_len=9102	Negarnaviricota	d__Bacteria;p__Firmicutes;c__Bacilli;o__Lactobacillales;f__Streptococcaceae;g__Streptococcus;s__Streptococcus agalactiae	27	1	9.26e-05
100687888	SRR11828459|k141_18049_flag=1_multi=4.0000_len=1029	Duplornaviricota	d__Bacteria;p__Firmicutes_A;c__Clostridia;o__Peptostreptococcales;f__Peptostreptococcaceae;g__Clostridioides;s__Clostridioides difficile	29	1	1.11e-05
100689484	SRR11829261|k141_152797_flag=1_multi=151.2792_len=2526	Kitrinoviricota	d__Bacteria;p__Firmicutes_A;c__Clostridia;o__Peptostreptococcales;f__Peptostreptococcaceae;g__Clostridioides;s__Clostridioides difficile	25	0	4.29e-05
100702592	SRR12334072|k141_33233_flag=1_multi=12.0000_len=6216	Pisuviricota	d__Bacteria;p__Fusobacteriota;c__Fusobacteriia;o__Fusobacteriales;f__Fusobacteriaceae;g__Fusobacterium_A;s__Fusobacterium_A ulcerans	23	0	0.000518
100702617	SRR12334072|k141_33233_flag=1_multi=12.0000_len=6216	Pisuviricota	d__Bacteria;p__Fusobacteriota;c__Fusobacteriia;o__Fusobacteriales;f__Fusobacteriaceae;g__Fusobacterium_A;s__Fusobacterium_A ulcerans	23	0	0.000518
100716839	SRR11829261|k141_152797_flag=1_multi=151.2792_len=2526	Kitrinoviricota	d__Bacteria;p__Firmicutes_A;c__Clostridia;o__Peptostreptococcales;f__Peptostreptococcaceae;g__Clostridioides;s__Clostridioides difficile	25	0	4.29e-05
100721017	SRR11828459|k141_18049_flag=1_multi=4.0000_len=1029	Duplornaviricota	d__Bacteria;p__Firmicutes_A;c__Clostridia;o__Peptostreptococcales;f__Peptostreptococcaceae;g__Clostridioides;s__Clostridioides difficile	29	1	1.11e-05
100722636	SRR11829261|k141_152797_flag=1_multi=151.2792_len=2526	Kitrinoviricota	d__Bacteria;p__Firmicutes_A;c__Clostridia;o__Peptostreptococcales;f__Peptostreptococcaceae;g__Clostridioides;s__Clostridioides difficile	25	0	4.29e-05
100725262	SRR11829261|k141_152797_flag=1_multi=151.2792_len=2526	Kitrinoviricota	d__Bacteria;p__Firmicutes_A;c__Clostridia;o__Peptostreptococcales;f__Peptostreptococcaceae;g__Clostridioides;s__Clostridioides difficile	25	0	4.29e-05
100735622	SRR11829261|k141_152797_flag=1_multi=151.2792_len=2526	Kitrinoviricota	d__Bacteria;p__Firmicutes_A;c__Clostridia;o__Peptostreptococcales;f__Peptostreptococcaceae;g__Clostridioides;s__Clostridioides difficile	25	0	4.29e-05
100744279	SRR11450580|k141_94502_flag=1_multi=14.0000_len=2445	Lenarviricota	d__Bacteria;p__Proteobacteria;c__Alphaproteobacteria;o__Rhizobiales;f__Kaistiaceae;g__Bauldia;s__Bauldia sp017305635	27	1	0.000123
100754449	SRR11829261|k141_152797_flag=1_multi=151.2792_len=2526	Kitrinoviricota	d__Bacteria;p__Firmicutes_A;c__Clostridia;o__Peptostreptococcales;f__Peptostreptococcaceae;g__Clostridioides;s__Clostridioides difficile	25	0	4.29e-05
100757474	SRR11828459|k141_18049_flag=1_multi=4.0000_len=1029	Duplornaviricota	d__Bacteria;p__Firmicutes_A;c__Clostridia;o__Peptostreptococcales;f__Peptostreptococcaceae;g__Clostridioides;s__Clostridioides difficile	29	1	1.11e-05
100758247	SRR11648360|k141_236875_flag=1_multi=13.0000_len=4864	urv.p.001	d__Bacteria;p__Bacteroidota;c__Bacteroidia;o__Flavobacteriales;f__PHOS-HE28;g__PHOS-HE28;s__PHOS-HE28 sp016712025	32	1	0.000143
100758247	SRR17509977|k141_156580_flag=1_multi=3.0000_len=1406	Pisuviricota	d__Bacteria;p__Bacteroidota;c__Bacteroidia;o__Flavobacteriales;f__PHOS-HE28;g__PHOS-HE28;s__PHOS-HE28 sp016712025	34	0	1.1e-05
100758248	SRR11648176|k141_298601_flag=1_multi=36.0000_len=3120	Kitrinoviricota	d__Bacteria;p__Bacteroidota;c__Bacteroidia;o__Flavobacteriales;f__PHOS-HE28;g__PHOS-HE28;s__PHOS-HE28 sp016712025	45	5	1.28e-07
100758248	SRR17509940|k141_117101_flag=1_multi=38.0000_len=2457	Duplornaviricota	d__Bacteria;p__Bacteroidota;c__Bacteroidia;o__Flavobacteriales;f__PHOS-HE28;g__PHOS-HE28;s__PHOS-HE28 sp016712025	26	1	0.001
100758248	SRR17497064|k141_128537_flag=1_multi=9.0000_len=1004	Pisuviricota	d__Bacteria;p__Bacteroidota;c__Bacteroidia;o__Flavobacteriales;f__PHOS-HE28;g__PHOS-HE28;s__PHOS-HE28 sp016712025	33	1	0.001
100758248	SRR11648360|k141_236875_flag=1_multi=13.0000_len=4864	urv.p.001	d__Bacteria;p__Bacteroidota;c__Bacteroidia;o__Flavobacteriales;f__PHOS-HE28;g__PHOS-HE28;s__PHOS-HE28 sp016712025	28	1	7.72e-05
100758248	SRR17509977|k141_156580_flag=1_multi=3.0000_len=1406	Pisuviricota	d__Bacteria;p__Bacteroidota;c__Bacteroidia;o__Flavobacteriales;f__PHOS-HE28;g__PHOS-HE28;s__PHOS-HE28 sp016712025	41	2	0.000278
100758248	SRR7540567|k141_243458_flag=1_multi=148.0000_len=2735	Kitrinoviricota	d__Bacteria;p__Bacteroidota;c__Bacteroidia;o__Flavobacteriales;f__PHOS-HE28;g__PHOS-HE28;s__PHOS-HE28 sp016712025	24	0	0.000278
100758248	SRR17497069|k141_154292_flag=1_multi=166.0000_len=1714	Pisuviricota	d__Bacteria;p__Bacteroidota;c__Bacteroidia;o__Flavobacteriales;f__PHOS-HE28;g__PHOS-HE28;s__PHOS-HE28 sp016712025	33	1	0.001
100758358	SRR11829261|k141_152797_flag=1_multi=151.2792_len=2526	Kitrinoviricota	d__Bacteria;p__Firmicutes_A;c__Clostridia;o__Peptostreptococcales;f__Peptostreptococcaceae;g__Clostridioides;s__Clostridioides difficile	25	0	4.29e-05
100761528	SRR14530882|k119_3271_flag=1_multi=7.0000_len=1885	Duplornaviricota	d__Bacteria;p__Myxococcota;c__Polyangia;o__Haliangiales;f__Haliangiaceae;g__UBA2376;s__UBA2376 sp018057825	27	1	0.000165
100767186	SRR7004668|k141_19464_flag=1_multi=6.0000_len=4016	Lenarviricota	d__Bacteria;p__Bacteroidota;c__Kryptonia;o__Kryptoniales;f__Kryptoniaceae;g__Kryptonium;s__Kryptonium thompsoni	26	1	0.000518
100779208	SRR7533101|k141_22375_flag=1_multi=33.0000_len=4114	Lenarviricota	d__Bacteria;p__Actinobacteriota;c__Actinomycetia;o__Streptomycetales;f__Streptomycetaceae;g__Streptomyces;s__Streptomyces cacaoi	23	0	0.000333
100781908	SRR8526273|k141_52666_flag=1_multi=9.0000_len=2044	Lenarviricota	d__Bacteria;p__Proteobacteria;c__Gammaproteobacteria;o__Burkholderiales;f__Casimicrobiaceae;g__CAIWHR01;s__CAIWHR01 sp016720425	27	1	9.26e-05
100781909	BC-0332570062|k141_61782	Lenarviricota	d__Bacteria;p__Proteobacteria;c__Gammaproteobacteria;o__Burkholderiales;f__Casimicrobiaceae;g__CAIWHR01;s__CAIWHR01 sp016720425	24	0	0.000288
100781909	SRR11565437|k141_190787_flag=1_multi=8.0000_len=2964	Kitrinoviricota	d__Bacteria;p__Proteobacteria;c__Gammaproteobacteria;o__Burkholderiales;f__Casimicrobiaceae;g__CAIWHR01;s__CAIWHR01 sp016720425	24	0	0.000288
100781909	SRR17509978|k141_113185_flag=1_multi=9.0000_len=1199	Pisuviricota	d__Bacteria;p__Proteobacteria;c__Gammaproteobacteria;o__Burkholderiales;f__Casimicrobiaceae;g__CAIWHR01;s__CAIWHR01 sp016720425	24	0	0.000288
100781909	SRR17481244|k141_92016_flag=1_multi=44.0000_len=3519	Lenarviricota	d__Bacteria;p__Proteobacteria;c__Gammaproteobacteria;o__Burkholderiales;f__Casimicrobiaceae;g__CAIWHR01;s__CAIWHR01 sp016720425	24	0	0.000288
100781909	SRR11450579|k141_22903_flag=1_multi=93.0000_len=8250	Pisuviricota	d__Bacteria;p__Proteobacteria;c__Gammaproteobacteria;o__Burkholderiales;f__Casimicrobiaceae;g__CAIWHR01;s__CAIWHR01 sp016720425	24	0	0.000288
100781909	SRR17509967|k141_44924_flag=1_multi=7.0000_len=2320	Pisuviricota	d__Bacteria;p__Proteobacteria;c__Gammaproteobacteria;o__Burkholderiales;f__Casimicrobiaceae;g__CAIWHR01;s__CAIWHR01 sp016720425	24	0	0.000288
100781909	SRR17497098|k141_13697_flag=1_multi=34.0000_len=1851	Pisuviricota	d__Bacteria;p__Proteobacteria;c__Gammaproteobacteria;o__Burkholderiales;f__Casimicrobiaceae;g__CAIWHR01;s__CAIWHR01 sp016720425	48	2	3.7e-08
100781909	SRR17497126|k141_132965_flag=1_multi=75.0000_len=1737	Pisuviricota	d__Bacteria;p__Proteobacteria;c__Gammaproteobacteria;o__Burkholderiales;f__Casimicrobiaceae;g__CAIWHR01;s__CAIWHR01 sp016720425	25	0	8.01e-05
100781909	SRR17497054|k141_191824_flag=1_multi=13.0000_len=2259	Pisuviricota	d__Bacteria;p__Proteobacteria;c__Gammaproteobacteria;o__Burkholderiales;f__Casimicrobiaceae;g__CAIWHR01;s__CAIWHR01 sp016720425	24	0	0.000288
100781909	SRR17497099|k141_59590_flag=1_multi=17.5683_len=1158	Pisuviricota	d__Bacteria;p__Proteobacteria;c__Gammaproteobacteria;o__Burkholderiales;f__Casimicrobiaceae;g__CAIWHR01;s__CAIWHR01 sp016720425	24	0	0.000288
100781909	SRR18770931|k141_53716_flag=1_multi=6.0000_len=1000	Lenarviricota	d__Bacteria;p__Proteobacteria;c__Gammaproteobacteria;o__Burkholderiales;f__Casimicrobiaceae;g__CAIWHR01;s__CAIWHR01 sp016720425	24	0	0.000288
100781909	SRR10849374|k141_218357_flag=1_multi=12.0000_len=3750	Lenarviricota	d__Bacteria;p__Proteobacteria;c__Gammaproteobacteria;o__Burkholderiales;f__Casimicrobiaceae;g__CAIWHR01;s__CAIWHR01 sp016720425	24	0	0.000288
100782476	SRR11828459|k141_18049_flag=1_multi=4.0000_len=1029	Duplornaviricota	d__Bacteria;p__Firmicutes_A;c__Clostridia;o__Peptostreptococcales;f__Peptostreptococcaceae;g__Clostridioides;s__Clostridioides difficile	29	1	1.11e-05
100782946	SRR11565178|k141_126786_flag=1_multi=13.6052_len=1747	Kitrinoviricota	d__Bacteria;p__Chloroflexota;c__Chloroflexia;o__Thermomicrobiales;f__Thermomicrobiaceae;g__Thermomicrobium;s__Thermomicrobium sp002898255	27	1	0.000165
100784572	SRR11827439|k141_109350_flag=1_multi=4.0000_len=2497	Duplornaviricota	d__Bacteria;p__Firmicutes_A;c__Clostridia;o__Peptostreptococcales;f__Peptostreptococcaceae;g__Clostridioides;s__Clostridioides difficile	26	1	0.000481
100794064	SRR11828459|k141_18049_flag=1_multi=4.0000_len=1029	Duplornaviricota	d__Bacteria;p__Firmicutes_A;c__Clostridia;o__Peptostreptococcales;f__Peptostreptococcaceae;g__Clostridioides;s__Clostridioides difficile	29	1	1.11e-05
100807778	SRR12685203|k141_98799_flag=1_multi=18.6177_len=5788	Unclassified	d__Archaea;p__Thermoproteota;c__Nitrososphaeria;o__Nitrososphaerales;f__Nitrososphaeraceae;g__TH5896;s__TH5896 sp014523695	31	1	0.000154
100808930	SRR11828806|k141_166307_flag=1_multi=10.0000_len=7065	Negarnaviricota	d__Bacteria;p__Firmicutes_A;c__Clostridia;o__Peptostreptococcales;f__Peptostreptococcaceae;g__Clostridioides;s__Clostridioides difficile	31	1	0.000154
100811141	SRR11828459|k141_18049_flag=1_multi=4.0000_len=1029	Duplornaviricota	d__Bacteria;p__Firmicutes_A;c__Clostridia;o__Peptostreptococcales;f__Peptostreptococcaceae;g__Clostridioides;s__Clostridioides difficile	29	1	1.11e-05
100812089	SRR11679817|k141_53982_flag=1_multi=114.0000_len=9916	Pisuviricota	d__Bacteria;p__Actinobacteriota;c__Actinomycetia;o__Actinomycetales;f__Dermatophilaceae;g__Pedococcus;s__Pedococcus sp013041615	29	1	7.95e-06
100812335	BC-0345235128|k141_77422	Lenarviricota	d__Bacteria;p__Proteobacteria;c__Gammaproteobacteria;o__Enterobacterales;f__Vibrionaceae;g__Vibrio;s__Vibrio cholerae	30	1	0.00037
100815183	SRR11648413|k141_155839_flag=0_multi=32.5524_len=1714	Lenarviricota	d__Bacteria;p__Proteobacteria;c__Gammaproteobacteria;o__Enterobacterales;f__Enterobacteriaceae;g__Salmonella;s__Salmonella enterica	23	0	0.000333
100815522	SRR11648413|k141_155839_flag=0_multi=32.5524_len=1714	Lenarviricota	d__Bacteria;p__Proteobacteria;c__Gammaproteobacteria;o__Enterobacterales;f__Enterobacteriaceae;g__Salmonella;s__Salmonella enterica	23	0	0.000333
100818308	SRR11828459|k141_18049_flag=1_multi=4.0000_len=1029	Duplornaviricota	d__Bacteria;p__Firmicutes_A;c__Clostridia;o__Peptostreptococcales;f__Peptostreptococcaceae;g__Clostridioides;s__Clostridioides difficile	29	1	1.11e-05
100818787	SRR11829261|k141_152797_flag=1_multi=151.2792_len=2526	Kitrinoviricota	d__Bacteria;p__Firmicutes_A;c__Clostridia;o__Peptostreptococcales;f__Peptostreptococcaceae;g__Clostridioides;s__Clostridioides difficile	25	0	4.29e-05
100819011	SRR11829332|k141_196499_flag=1_multi=18.0000_len=17051	Kitrinoviricota	d__Bacteria;p__Chloroflexota;c__Anaerolineae;o__B4-G1;f__B4-G1;g__B4-G1;s__B4-G1 sp003648025	23	0	0.000555
100834935	SRR11829261|k141_152797_flag=1_multi=151.2792_len=2526	Kitrinoviricota	d__Bacteria;p__Firmicutes_A;c__Clostridia;o__Peptostreptococcales;f__Peptostreptococcaceae;g__Clostridioides;s__Clostridioides difficile	25	0	4.29e-05
100836718	SRR11648413|k141_155839_flag=0_multi=32.5524_len=1714	Lenarviricota	d__Bacteria;p__Proteobacteria;c__Gammaproteobacteria;o__Enterobacterales;f__Enterobacteriaceae;g__Salmonella;s__Salmonella enterica	23	0	0.000333
100837385	SRR11829261|k141_152797_flag=1_multi=151.2792_len=2526	Kitrinoviricota	d__Bacteria;p__Firmicutes_A;c__Clostridia;o__Peptostreptococcales;f__Peptostreptococcaceae;g__Clostridioides;s__Clostridioides difficile	25	0	4.29e-05
100838576	SRR11829144|k141_41746_flag=1_multi=10.0000_len=6681	Pisuviricota	d__Bacteria;p__Proteobacteria;c__Gammaproteobacteria;o__Enterobacterales;f__Enterobacteriaceae;g__Salmonella;s__Salmonella enterica	25	0	2.57e-05
100839182	SRR7534265|k141_115420_flag=1_multi=82.0000_len=5738	Pisuviricota	d__Bacteria;p__Actinobacteriota;c__Actinomycetia;o__Actinomycetales;f__Bifidobacteriaceae;g__Bifidobacterium;s__Bifidobacterium breve	27	1	0.000134
100842852	SRR11829261|k141_152797_flag=1_multi=151.2792_len=2526	Kitrinoviricota	d__Bacteria;p__Firmicutes_A;c__Clostridia;o__Peptostreptococcales;f__Peptostreptococcaceae;g__Clostridioides;s__Clostridioides difficile	25	0	4.29e-05
100843252	SRR11829261|k141_152797_flag=1_multi=151.2792_len=2526	Kitrinoviricota	d__Bacteria;p__Firmicutes_A;c__Clostridia;o__Peptostreptococcales;f__Peptostreptococcaceae;g__Clostridioides;s__Clostridioides difficile	25	0	4.29e-05
100843558	SRR11829261|k141_152797_flag=1_multi=151.2792_len=2526	Kitrinoviricota	d__Bacteria;p__Firmicutes_A;c__Clostridia;o__Peptostreptococcales;f__Peptostreptococcaceae;g__Clostridioides;s__Clostridioides difficile	25	0	4.29e-05
100846702	SRR11829261|k141_152797_flag=1_multi=151.2792_len=2526	Kitrinoviricota	d__Bacteria;p__Firmicutes_A;c__Clostridia;o__Peptostreptococcales;f__Peptostreptococcaceae;g__Clostridioides;s__Clostridioides difficile	25	0	4.29e-05
100846859	SRR17509974|k141_100544_flag=1_multi=10.8989_len=4205	Lenarviricota	d__Bacteria;p__Bacteroidota;c__Bacteroidia;o__Bacteroidales;f__P3;g__UBA1711;s__UBA1711 sp900319865	27	0	0.000407
100850018	SRR11828459|k141_18049_flag=1_multi=4.0000_len=1029	Duplornaviricota	d__Bacteria;p__Firmicutes_A;c__Clostridia;o__Peptostreptococcales;f__Peptostreptococcaceae;g__Clostridioides;s__Clostridioides difficile	29	1	1.11e-05
100853213	SRR11565847|k141_208619_flag=1_multi=8.0000_len=6849	Negarnaviricota	d__Bacteria;p__Proteobacteria;c__Gammaproteobacteria;o__Burkholderiales;f__Methylophilaceae;g__Methylobacillus;s__Methylobacillus flagellatus	26	1	0.000518
100853226	SRR11565847|k141_208619_flag=1_multi=8.0000_len=6849	Negarnaviricota	d__Bacteria;p__Proteobacteria;c__Gammaproteobacteria;o__Burkholderiales;f__Methylophilaceae;g__Methylobacillus;s__Methylobacillus flagellatus	26	1	0.000481
100853302	SRR11565847|k141_208619_flag=1_multi=8.0000_len=6849	Negarnaviricota	d__Bacteria;p__Proteobacteria;c__Gammaproteobacteria;o__Burkholderiales;f__Methylophilaceae;g__Methylobacillus;s__Methylobacillus flagellatus	26	1	0.000518
100853315	SRR11565847|k141_208619_flag=1_multi=8.0000_len=6849	Negarnaviricota	d__Bacteria;p__Proteobacteria;c__Gammaproteobacteria;o__Burkholderiales;f__Methylophilaceae;g__Methylobacillus;s__Methylobacillus flagellatus	26	1	0.000481
100854407	SRR11076227|k141_564324_flag=1_multi=26.0000_len=9102	Negarnaviricota	d__Bacteria;p__Firmicutes;c__Bacilli;o__Lactobacillales;f__Streptococcaceae;g__Streptococcus;s__Streptococcus agalactiae	27	1	9.26e-05
100854777	SRR11827439|k141_109350_flag=1_multi=4.0000_len=2497	Duplornaviricota	d__Bacteria;p__Firmicutes_A;c__Clostridia;o__Peptostreptococcales;f__Peptostreptococcaceae;g__Clostridioides;s__Clostridioides difficile	26	1	0.000481
100863689	SRR11828459|k141_18049_flag=1_multi=4.0000_len=1029	Duplornaviricota	d__Bacteria;p__Firmicutes_A;c__Clostridia;o__Peptostreptococcales;f__Peptostreptococcaceae;g__Clostridioides;s__Clostridioides difficile	29	1	1.11e-05
100866323	SRR10849744|k141_310535_flag=1_multi=101.0000_len=3955	Lenarviricota	d__Bacteria;p__Myxococcota;c__Polyangia;o__Nannocystales;f__Nannocystaceae;g__Ga0077550;s__Ga0077550 sp016709225	24	0	0.000339
100866323	SRR14530880|k119_2620_flag=1_multi=62.0000_len=4380	Kitrinoviricota	d__Bacteria;p__Myxococcota;c__Polyangia;o__Nannocystales;f__Nannocystaceae;g__Ga0077550;s__Ga0077550 sp016709225	30	1	7.29e-06
100866327	SRR14530880|k119_2620_flag=1_multi=62.0000_len=4380	Kitrinoviricota	d__Bacteria;p__Myxococcota;c__Polyangia;o__Nannocystales;f__Nannocystaceae;g__Ga0077550;s__Ga0077550 sp016709225	30	0	1.35e-05
100866328	SRR11450585|k141_81222_flag=1_multi=29.0000_len=7696	Kitrinoviricota	d__Bacteria;p__Myxococcota;c__Polyangia;o__Nannocystales;f__Nannocystaceae;g__Ga0077550;s__Ga0077550 sp016709225	23	0	0.000666
100866328	SRR17497104|k141_42863_flag=1_multi=4.0000_len=1013	Lenarviricota	d__Bacteria;p__Myxococcota;c__Polyangia;o__Nannocystales;f__Nannocystaceae;g__Ga0077550;s__Ga0077550 sp016709225	28	1	5.15e-05
100866328	SRR17509979|k141_40329_flag=1_multi=17.0000_len=1013	Pisuviricota	d__Bacteria;p__Myxococcota;c__Polyangia;o__Nannocystales;f__Nannocystaceae;g__Ga0077550;s__Ga0077550 sp016709225	28	1	5.15e-05
100866328	SRR17509940|k141_117101_flag=1_multi=38.0000_len=2457	Duplornaviricota	d__Bacteria;p__Myxococcota;c__Polyangia;o__Nannocystales;f__Nannocystaceae;g__Ga0077550;s__Ga0077550 sp016709225	26	1	0.000666
100866328	SRR14530880|k119_2620_flag=1_multi=62.0000_len=4380	Kitrinoviricota	d__Bacteria;p__Myxococcota;c__Polyangia;o__Nannocystales;f__Nannocystaceae;g__Ga0077550;s__Ga0077550 sp016709225	33	3	0.000185
100866328	SRR17497099|k141_59590_flag=1_multi=17.5683_len=1158	Pisuviricota	d__Bacteria;p__Myxococcota;c__Polyangia;o__Nannocystales;f__Nannocystaceae;g__Ga0077550;s__Ga0077550 sp016709225	28	0	0.000185
100866328	SRR11828805|k141_11533_flag=1_multi=89.8329_len=3648	Kitrinoviricota	d__Bacteria;p__Myxococcota;c__Polyangia;o__Nannocystales;f__Nannocystaceae;g__Ga0077550;s__Ga0077550 sp016709225	32	1	5.15e-05
100866343	SRR17509976|k141_164083_flag=1_multi=58.0000_len=4337	Pisuviricota	d__Bacteria;p__Myxococcota;c__Polyangia;o__Nannocystales;f__Nannocystaceae;g__Ga0077550;s__Ga0077550 sp016709225	34	2	4.3e-06
100866343	SRR10849374|k141_218357_flag=1_multi=12.0000_len=3750	Lenarviricota	d__Bacteria;p__Myxococcota;c__Polyangia;o__Nannocystales;f__Nannocystaceae;g__Ga0077550;s__Ga0077550 sp016709225	37	1	1.99e-09
100866343	SRR17481242|k141_14860_flag=1_multi=140.0000_len=3974	Unclassified	d__Bacteria;p__Myxococcota;c__Polyangia;o__Nannocystales;f__Nannocystaceae;g__Ga0077550;s__Ga0077550 sp016709225	73	3	1.54e-10
100866343	SRR17509976|k141_100049_flag=1_multi=72.0000_len=1862	Pisuviricota	d__Bacteria;p__Myxococcota;c__Polyangia;o__Nannocystales;f__Nannocystaceae;g__Ga0077550;s__Ga0077550 sp016709225	35	2	1.2e-06
100866343	SRR17509979|k141_28799_flag=1_multi=182.0000_len=1917	Pisuviricota	d__Bacteria;p__Myxococcota;c__Polyangia;o__Nannocystales;f__Nannocystaceae;g__Ga0077550;s__Ga0077550 sp016709225	35	0	5.52e-10
100866343	SRR17497126|k141_68629_flag=1_multi=6.0000_len=1048	Pisuviricota	d__Bacteria;p__Myxococcota;c__Polyangia;o__Nannocystales;f__Nannocystaceae;g__Ga0077550;s__Ga0077550 sp016709225	24	0	0.00072
100866343	SRR17509979|k141_54497_flag=1_multi=434.0000_len=1853	Pisuviricota	d__Bacteria;p__Myxococcota;c__Polyangia;o__Nannocystales;f__Nannocystaceae;g__Ga0077550;s__Ga0077550 sp016709225	35	0	5.52e-10
100866343	SRR17509979|k141_62709_flag=1_multi=44.0000_len=2751	Pisuviricota	d__Bacteria;p__Myxococcota;c__Polyangia;o__Nannocystales;f__Nannocystaceae;g__Ga0077550;s__Ga0077550 sp016709225	36	0	2.57e-08
100866343	SRR17509940|k141_117101_flag=1_multi=38.0000_len=2457	Duplornaviricota	d__Bacteria;p__Myxococcota;c__Polyangia;o__Nannocystales;f__Nannocystaceae;g__Ga0077550;s__Ga0077550 sp016709225	27	0	1.55e-05
100866343	SRR17497126|k141_95757_flag=1_multi=826.0000_len=3116	Lenarviricota	d__Bacteria;p__Myxococcota;c__Polyangia;o__Nannocystales;f__Nannocystaceae;g__Ga0077550;s__Ga0077550 sp016709225	35	1	2.57e-08
100866343	SRR17509979|k141_52575_flag=1_multi=83.6741_len=1804	Pisuviricota	d__Bacteria;p__Myxococcota;c__Polyangia;o__Nannocystales;f__Nannocystaceae;g__Ga0077550;s__Ga0077550 sp016709225	35	0	5.52e-10
100866343	SRR17509978|k141_113185_flag=1_multi=9.0000_len=1199	Pisuviricota	d__Bacteria;p__Myxococcota;c__Polyangia;o__Nannocystales;f__Nannocystaceae;g__Ga0077550;s__Ga0077550 sp016709225	33	2	1.55e-05
100866343	SRR17497049|k141_87067_flag=1_multi=464.0000_len=3624	Lenarviricota	d__Bacteria;p__Myxococcota;c__Polyangia;o__Nannocystales;f__Nannocystaceae;g__Ga0077550;s__Ga0077550 sp016709225	31	2	0.0002
100866343	SRR11648360|k141_236875_flag=1_multi=13.0000_len=4864	urv.p.001	d__Bacteria;p__Myxococcota;c__Polyangia;o__Nannocystales;f__Nannocystaceae;g__Ga0077550;s__Ga0077550 sp016709225	29	0	1.2e-06
100866343	SRR10849744|k141_310535_flag=1_multi=101.0000_len=3955	Lenarviricota	d__Bacteria;p__Myxococcota;c__Polyangia;o__Nannocystales;f__Nannocystaceae;g__Ga0077550;s__Ga0077550 sp016709225	34	0	1.99e-09
100866343	SRR18771403|k141_131354_flag=1_multi=48.8407_len=10690	Pisuviricota	d__Bacteria;p__Myxococcota;c__Polyangia;o__Nannocystales;f__Nannocystaceae;g__Ga0077550;s__Ga0077550 sp016709225	50	5	5.52e-10
100866343	BC-0345298860|k141_3179	Lenarviricota	d__Bacteria;p__Myxococcota;c__Polyangia;o__Nannocystales;f__Nannocystaceae;g__Ga0077550;s__Ga0077550 sp016709225	73	11	9.18e-13
100866343	SRR17497054|k141_191824_flag=1_multi=13.0000_len=2259	Pisuviricota	d__Bacteria;p__Myxococcota;c__Polyangia;o__Nannocystales;f__Nannocystaceae;g__Ga0077550;s__Ga0077550 sp016709225	35	0	5.52e-10
100866343	SRR17481244|k141_92016_flag=1_multi=44.0000_len=3519	Lenarviricota	d__Bacteria;p__Myxococcota;c__Polyangia;o__Nannocystales;f__Nannocystaceae;g__Ga0077550;s__Ga0077550 sp016709225	34	0	1.99e-09
100866343	SRR11648176|k141_298601_flag=1_multi=36.0000_len=3120	Kitrinoviricota	d__Bacteria;p__Myxococcota;c__Polyangia;o__Nannocystales;f__Nannocystaceae;g__Ga0077550;s__Ga0077550 sp016709225	54	5	3.3e-12
100866343	SRR17497064|k141_135790_flag=1_multi=52.0000_len=1739	Pisuviricota	d__Bacteria;p__Myxococcota;c__Polyangia;o__Nannocystales;f__Nannocystaceae;g__Ga0077550;s__Ga0077550 sp016709225	35	0	5.52e-10
100866343	SRR17509978|k141_111246_flag=1_multi=25.3407_len=1855	Pisuviricota	d__Bacteria;p__Myxococcota;c__Polyangia;o__Nannocystales;f__Nannocystaceae;g__Ga0077550;s__Ga0077550 sp016709225	35	0	5.52e-10
100866343	SRR17497092|k141_33398_flag=1_multi=217.0121_len=1878	Pisuviricota	d__Bacteria;p__Myxococcota;c__Polyangia;o__Nannocystales;f__Nannocystaceae;g__Ga0077550;s__Ga0077550 sp016709225	35	0	5.52e-10
100866343	SRR18770931|k141_53716_flag=1_multi=6.0000_len=1000	Lenarviricota	d__Bacteria;p__Myxococcota;c__Polyangia;o__Nannocystales;f__Nannocystaceae;g__Ga0077550;s__Ga0077550 sp016709225	35	2	1.2e-06
100866343	SRR11829331|k141_332492_flag=1_multi=252.0000_len=4351	Lenarviricota	d__Bacteria;p__Myxococcota;c__Polyangia;o__Nannocystales;f__Nannocystaceae;g__Ga0077550;s__Ga0077550 sp016709225	73	11	9.18e-13
100866343	SRR17509979|k141_53443_flag=1_multi=169.8080_len=4630	Kitrinoviricota	d__Bacteria;p__Myxococcota;c__Polyangia;o__Nannocystales;f__Nannocystaceae;g__Ga0077550;s__Ga0077550 sp016709225	73	7	1.19e-11
100866343	SRR11450585|k141_260925_flag=1_multi=20.0000_len=6420	Unclassified	d__Bacteria;p__Myxococcota;c__Polyangia;o__Nannocystales;f__Nannocystaceae;g__Ga0077550;s__Ga0077550 sp016709225	36	0	2.57e-08
100866343	SRR17509977|k141_156580_flag=1_multi=3.0000_len=1406	Pisuviricota	d__Bacteria;p__Myxococcota;c__Polyangia;o__Nannocystales;f__Nannocystaceae;g__Ga0077550;s__Ga0077550 sp016709225	36	1	1.2e-06
100866343	SRR17497068|k141_144847_flag=1_multi=37.7881_len=1816	Pisuviricota	d__Bacteria;p__Myxococcota;c__Polyangia;o__Nannocystales;f__Nannocystaceae;g__Ga0077550;s__Ga0077550 sp016709225	73	11	9.18e-13
100866343	SRR17497069|k141_154292_flag=1_multi=166.0000_len=1714	Pisuviricota	d__Bacteria;p__Myxococcota;c__Polyangia;o__Nannocystales;f__Nannocystaceae;g__Ga0077550;s__Ga0077550 sp016709225	31	1	4.3e-06
100866343	SRR17509979|k141_40329_flag=1_multi=17.0000_len=1013	Pisuviricota	d__Bacteria;p__Myxococcota;c__Polyangia;o__Nannocystales;f__Nannocystaceae;g__Ga0077550;s__Ga0077550 sp016709225	32	2	5.56e-05
100866343	BC-0332570062|k141_61782	Lenarviricota	d__Bacteria;p__Myxococcota;c__Polyangia;o__Nannocystales;f__Nannocystaceae;g__Ga0077550;s__Ga0077550 sp016709225	33	0	7.14e-09
100866343	SRR17497098|k141_13697_flag=1_multi=34.0000_len=1851	Pisuviricota	d__Bacteria;p__Myxococcota;c__Polyangia;o__Nannocystales;f__Nannocystaceae;g__Ga0077550;s__Ga0077550 sp016709225	34	0	1.99e-09
100866343	SRR11450579|k141_22903_flag=1_multi=93.0000_len=8250	Pisuviricota	d__Bacteria;p__Myxococcota;c__Polyangia;o__Nannocystales;f__Nannocystaceae;g__Ga0077550;s__Ga0077550 sp016709225	27	0	1.55e-05
100866343	SRR11828805|k141_11533_flag=1_multi=89.8329_len=3648	Kitrinoviricota	d__Bacteria;p__Myxococcota;c__Polyangia;o__Nannocystales;f__Nannocystaceae;g__Ga0077550;s__Ga0077550 sp016709225	36	1	7.14e-09
100866343	SRR17509977|k141_137261_flag=1_multi=15.0000_len=2450	Kitrinoviricota	d__Bacteria;p__Myxococcota;c__Polyangia;o__Nannocystales;f__Nannocystaceae;g__Ga0077550;s__Ga0077550 sp016709225	34	2	4.3e-06
100866343	SRR17497064|k141_128537_flag=1_multi=9.0000_len=1004	Pisuviricota	d__Bacteria;p__Myxococcota;c__Polyangia;o__Nannocystales;f__Nannocystaceae;g__Ga0077550;s__Ga0077550 sp016709225	31	1	4.3e-06
100866343	SRR11565437|k141_190787_flag=1_multi=8.0000_len=2964	Kitrinoviricota	d__Bacteria;p__Myxococcota;c__Polyangia;o__Nannocystales;f__Nannocystaceae;g__Ga0077550;s__Ga0077550 sp016709225	46	6	4.3e-06
100866343	SRR14530880|k119_2620_flag=1_multi=62.0000_len=4380	Kitrinoviricota	d__Bacteria;p__Myxococcota;c__Polyangia;o__Nannocystales;f__Nannocystaceae;g__Ga0077550;s__Ga0077550 sp016709225	47	0	1.97e-14
100866343	SRR17509967|k141_44924_flag=1_multi=7.0000_len=2320	Pisuviricota	d__Bacteria;p__Myxococcota;c__Polyangia;o__Nannocystales;f__Nannocystaceae;g__Ga0077550;s__Ga0077550 sp016709225	38	0	1.55e-05
100866343	SRR17509977|k141_51278_flag=1_multi=666.0000_len=6190	Pisuviricota	d__Bacteria;p__Myxococcota;c__Polyangia;o__Nannocystales;f__Nannocystaceae;g__Ga0077550;s__Ga0077550 sp016709225	36	0	2.57e-08
100866344	SRR10849744|k141_310535_flag=1_multi=101.0000_len=3955	Lenarviricota	d__Bacteria;p__Myxococcota;c__Polyangia;o__Nannocystales;f__Nannocystaceae;g__Ga0077550;s__Ga0077550 sp016709225	29	1	3.34e-05
100866344	SRR11565437|k141_190787_flag=1_multi=8.0000_len=2964	Kitrinoviricota	d__Bacteria;p__Myxococcota;c__Polyangia;o__Nannocystales;f__Nannocystaceae;g__Ga0077550;s__Ga0077550 sp016709225	25	0	0.00012
100866349	SRR11828805|k141_11533_flag=1_multi=89.8329_len=3648	Kitrinoviricota	d__Bacteria;p__Myxococcota;c__Polyangia;o__Nannocystales;f__Nannocystaceae;g__Ga0077550;s__Ga0077550 sp016709225	23	0	0.000592
100866349	SRR17509979|k141_40329_flag=1_multi=17.0000_len=1013	Pisuviricota	d__Bacteria;p__Myxococcota;c__Polyangia;o__Nannocystales;f__Nannocystaceae;g__Ga0077550;s__Ga0077550 sp016709225	23	0	0.000592
100866349	SRR17497099|k141_59590_flag=1_multi=17.5683_len=1158	Pisuviricota	d__Bacteria;p__Myxococcota;c__Polyangia;o__Nannocystales;f__Nannocystaceae;g__Ga0077550;s__Ga0077550 sp016709225	26	0	1.27e-05
100866349	SRR17509940|k141_147462_flag=1_multi=29.0000_len=3674	Unclassified	d__Bacteria;p__Myxococcota;c__Polyangia;o__Nannocystales;f__Nannocystaceae;g__Ga0077550;s__Ga0077550 sp016709225	26	1	0.000592
100866352	SRR11450585|k141_260925_flag=1_multi=20.0000_len=6420	Unclassified	d__Bacteria;p__Myxococcota;c__Polyangia;o__Nannocystales;f__Nannocystaceae;g__Ga0077550;s__Ga0077550 sp016709225	26	1	0.000333
100866352	BC-0345298860|k141_3179	Lenarviricota	d__Bacteria;p__Myxococcota;c__Polyangia;o__Nannocystales;f__Nannocystaceae;g__Ga0077550;s__Ga0077550 sp016709225	26	1	0.000333
100866352	SRR17509940|k141_117101_flag=1_multi=38.0000_len=2457	Duplornaviricota	d__Bacteria;p__Myxococcota;c__Polyangia;o__Nannocystales;f__Nannocystaceae;g__Ga0077550;s__Ga0077550 sp016709225	27	1	9.26e-05
100866352	SRR11829331|k141_332492_flag=1_multi=252.0000_len=4351	Lenarviricota	d__Bacteria;p__Myxococcota;c__Polyangia;o__Nannocystales;f__Nannocystaceae;g__Ga0077550;s__Ga0077550 sp016709225	26	1	0.000333
100866352	SRR17497092|k141_33398_flag=1_multi=217.0121_len=1878	Pisuviricota	d__Bacteria;p__Myxococcota;c__Polyangia;o__Nannocystales;f__Nannocystaceae;g__Ga0077550;s__Ga0077550 sp016709225	26	1	0.000333
100866352	SRR11648176|k141_298601_flag=1_multi=36.0000_len=3120	Kitrinoviricota	d__Bacteria;p__Myxococcota;c__Polyangia;o__Nannocystales;f__Nannocystaceae;g__Ga0077550;s__Ga0077550 sp016709225	30	2	9.26e-05
100866352	SRR17497068|k141_144847_flag=1_multi=37.7881_len=1816	Pisuviricota	d__Bacteria;p__Myxococcota;c__Polyangia;o__Nannocystales;f__Nannocystaceae;g__Ga0077550;s__Ga0077550 sp016709225	26	1	0.000333
100866352	SRR17509967|k141_44924_flag=1_multi=7.0000_len=2320	Pisuviricota	d__Bacteria;p__Myxococcota;c__Polyangia;o__Nannocystales;f__Nannocystaceae;g__Ga0077550;s__Ga0077550 sp016709225	26	1	0.000333
100866352	SRR17509979|k141_54497_flag=1_multi=434.0000_len=1853	Pisuviricota	d__Bacteria;p__Myxococcota;c__Polyangia;o__Nannocystales;f__Nannocystaceae;g__Ga0077550;s__Ga0077550 sp016709225	26	1	0.000333
100866352	SRR18771403|k141_131354_flag=1_multi=48.8407_len=10690	Pisuviricota	d__Bacteria;p__Myxococcota;c__Polyangia;o__Nannocystales;f__Nannocystaceae;g__Ga0077550;s__Ga0077550 sp016709225	26	1	0.000333
100866352	SRR17509979|k141_28799_flag=1_multi=182.0000_len=1917	Pisuviricota	d__Bacteria;p__Myxococcota;c__Polyangia;o__Nannocystales;f__Nannocystaceae;g__Ga0077550;s__Ga0077550 sp016709225	26	1	0.000333
100866352	SRR17509979|k141_53443_flag=1_multi=169.8080_len=4630	Kitrinoviricota	d__Bacteria;p__Myxococcota;c__Polyangia;o__Nannocystales;f__Nannocystaceae;g__Ga0077550;s__Ga0077550 sp016709225	26	1	0.000333
100866352	SRR17481242|k141_14860_flag=1_multi=140.0000_len=3974	Unclassified	d__Bacteria;p__Myxococcota;c__Polyangia;o__Nannocystales;f__Nannocystaceae;g__Ga0077550;s__Ga0077550 sp016709225	26	1	0.000333
100866352	SRR17481244|k141_92016_flag=1_multi=44.0000_len=3519	Lenarviricota	d__Bacteria;p__Myxococcota;c__Polyangia;o__Nannocystales;f__Nannocystaceae;g__Ga0077550;s__Ga0077550 sp016709225	26	1	0.000333
100866352	SRR17497054|k141_191824_flag=1_multi=13.0000_len=2259	Pisuviricota	d__Bacteria;p__Myxococcota;c__Polyangia;o__Nannocystales;f__Nannocystaceae;g__Ga0077550;s__Ga0077550 sp016709225	26	1	0.000333
100866352	BC-0332570062|k141_61782	Lenarviricota	d__Bacteria;p__Myxococcota;c__Polyangia;o__Nannocystales;f__Nannocystaceae;g__Ga0077550;s__Ga0077550 sp016709225	26	1	0.000333
100866352	SRR17497098|k141_13697_flag=1_multi=34.0000_len=1851	Pisuviricota	d__Bacteria;p__Myxococcota;c__Polyangia;o__Nannocystales;f__Nannocystaceae;g__Ga0077550;s__Ga0077550 sp016709225	26	1	0.000333
100866352	SRR17509978|k141_111246_flag=1_multi=25.3407_len=1855	Pisuviricota	d__Bacteria;p__Myxococcota;c__Polyangia;o__Nannocystales;f__Nannocystaceae;g__Ga0077550;s__Ga0077550 sp016709225	26	1	0.000333
100866352	SRR10849744|k141_310535_flag=1_multi=101.0000_len=3955	Lenarviricota	d__Bacteria;p__Myxococcota;c__Polyangia;o__Nannocystales;f__Nannocystaceae;g__Ga0077550;s__Ga0077550 sp016709225	26	1	0.000333
100866352	SRR17497064|k141_135790_flag=1_multi=52.0000_len=1739	Pisuviricota	d__Bacteria;p__Myxococcota;c__Polyangia;o__Nannocystales;f__Nannocystaceae;g__Ga0077550;s__Ga0077550 sp016709225	26	1	0.000333
100866352	SRR17509979|k141_52575_flag=1_multi=83.6741_len=1804	Pisuviricota	d__Bacteria;p__Myxococcota;c__Polyangia;o__Nannocystales;f__Nannocystaceae;g__Ga0077550;s__Ga0077550 sp016709225	26	1	0.000333
100866352	SRR14530880|k119_2620_flag=1_multi=62.0000_len=4380	Kitrinoviricota	d__Bacteria;p__Myxococcota;c__Polyangia;o__Nannocystales;f__Nannocystaceae;g__Ga0077550;s__Ga0077550 sp016709225	30	1	1.99e-06
100866352	SRR11450579|k141_22903_flag=1_multi=93.0000_len=8250	Pisuviricota	d__Bacteria;p__Myxococcota;c__Polyangia;o__Nannocystales;f__Nannocystaceae;g__Ga0077550;s__Ga0077550 sp016709225	27	1	9.26e-05
100866352	SRR17509976|k141_164083_flag=1_multi=58.0000_len=4337	Pisuviricota	d__Bacteria;p__Myxococcota;c__Polyangia;o__Nannocystales;f__Nannocystaceae;g__Ga0077550;s__Ga0077550 sp016709225	26	1	0.000333
100866352	SRR17509977|k141_51278_flag=1_multi=666.0000_len=6190	Pisuviricota	d__Bacteria;p__Myxococcota;c__Polyangia;o__Nannocystales;f__Nannocystaceae;g__Ga0077550;s__Ga0077550 sp016709225	26	1	0.000333
100866352	SRR10849374|k141_218357_flag=1_multi=12.0000_len=3750	Lenarviricota	d__Bacteria;p__Myxococcota;c__Polyangia;o__Nannocystales;f__Nannocystaceae;g__Ga0077550;s__Ga0077550 sp016709225	29	2	0.000333
100866352	SRR11828805|k141_11533_flag=1_multi=89.8329_len=3648	Kitrinoviricota	d__Bacteria;p__Myxococcota;c__Polyangia;o__Nannocystales;f__Nannocystaceae;g__Ga0077550;s__Ga0077550 sp016709225	29	1	7.16e-06
100866352	SRR17509979|k141_62709_flag=1_multi=44.0000_len=2751	Pisuviricota	d__Bacteria;p__Myxococcota;c__Polyangia;o__Nannocystales;f__Nannocystaceae;g__Ga0077550;s__Ga0077550 sp016709225	26	1	0.000333
100866352	SRR17509979|k141_40329_flag=1_multi=17.0000_len=1013	Pisuviricota	d__Bacteria;p__Myxococcota;c__Polyangia;o__Nannocystales;f__Nannocystaceae;g__Ga0077550;s__Ga0077550 sp016709225	23	0	0.000333
100866352	SRR17509977|k141_156580_flag=1_multi=3.0000_len=1406	Pisuviricota	d__Bacteria;p__Myxococcota;c__Polyangia;o__Nannocystales;f__Nannocystaceae;g__Ga0077550;s__Ga0077550 sp016709225	25	0	2.57e-05
100866361	SRR18771403|k141_131354_flag=1_multi=48.8407_len=10690	Pisuviricota	d__Bacteria;p__Myxococcota;c__Polyangia;o__Nannocystales;f__Nannocystaceae;g__Ga0077550;s__Ga0077550 sp016709225	61	3	1.73e-17
100866361	BC-0332570062|k141_61782	Lenarviricota	d__Bacteria;p__Myxococcota;c__Polyangia;o__Nannocystales;f__Nannocystaceae;g__Ga0077550;s__Ga0077550 sp016709225	33	0	3.78e-09
100866361	SRR17497064|k141_128537_flag=1_multi=9.0000_len=1004	Pisuviricota	d__Bacteria;p__Myxococcota;c__Polyangia;o__Nannocystales;f__Nannocystaceae;g__Ga0077550;s__Ga0077550 sp016709225	31	1	2.27e-06
100866361	SRR17509976|k141_164083_flag=1_multi=58.0000_len=4337	Pisuviricota	d__Bacteria;p__Myxococcota;c__Polyangia;o__Nannocystales;f__Nannocystaceae;g__Ga0077550;s__Ga0077550 sp016709225	34	2	2.27e-06
100866361	SRR17509979|k141_54497_flag=1_multi=434.0000_len=1853	Pisuviricota	d__Bacteria;p__Myxococcota;c__Polyangia;o__Nannocystales;f__Nannocystaceae;g__Ga0077550;s__Ga0077550 sp016709225	61	4	4.82e-18
100866361	SRR17497126|k141_68629_flag=1_multi=6.0000_len=1048	Pisuviricota	d__Bacteria;p__Myxococcota;c__Polyangia;o__Nannocystales;f__Nannocystaceae;g__Ga0077550;s__Ga0077550 sp016709225	24	0	0.00038
100866361	SRR17509940|k141_117101_flag=1_multi=38.0000_len=2457	Duplornaviricota	d__Bacteria;p__Myxococcota;c__Polyangia;o__Nannocystales;f__Nannocystaceae;g__Ga0077550;s__Ga0077550 sp016709225	26	0	2.94e-05
100866361	SRR17481242|k141_14860_flag=1_multi=140.0000_len=3974	Unclassified	d__Bacteria;p__Myxococcota;c__Polyangia;o__Nannocystales;f__Nannocystaceae;g__Ga0077550;s__Ga0077550 sp016709225	61	4	4.82e-18
100866361	SRR11450579|k141_22903_flag=1_multi=93.0000_len=8250	Pisuviricota	d__Bacteria;p__Myxococcota;c__Polyangia;o__Nannocystales;f__Nannocystaceae;g__Ga0077550;s__Ga0077550 sp016709225	27	0	8.18e-06
100866361	SRR10849744|k141_310535_flag=1_multi=101.0000_len=3955	Lenarviricota	d__Bacteria;p__Myxococcota;c__Polyangia;o__Nannocystales;f__Nannocystaceae;g__Ga0077550;s__Ga0077550 sp016709225	38	0	6.28e-12
100866361	SRR11648176|k141_298601_flag=1_multi=36.0000_len=3120	Kitrinoviricota	d__Bacteria;p__Myxococcota;c__Polyangia;o__Nannocystales;f__Nannocystaceae;g__Ga0077550;s__Ga0077550 sp016709225	61	1	6.23e-17
100866361	SRR17509979|k141_62709_flag=1_multi=44.0000_len=2751	Pisuviricota	d__Bacteria;p__Myxococcota;c__Polyangia;o__Nannocystales;f__Nannocystaceae;g__Ga0077550;s__Ga0077550 sp016709225	40	1	2.26e-11
100866361	SRR11648360|k141_236875_flag=1_multi=13.0000_len=4864	urv.p.001	d__Bacteria;p__Myxococcota;c__Polyangia;o__Nannocystales;f__Nannocystaceae;g__Ga0077550;s__Ga0077550 sp016709225	28	0	2.27e-06
100866361	SRR14530880|k119_2620_flag=1_multi=62.0000_len=4380	Kitrinoviricota	d__Bacteria;p__Myxococcota;c__Polyangia;o__Nannocystales;f__Nannocystaceae;g__Ga0077550;s__Ga0077550 sp016709225	34	0	1.05e-09
100866361	SRR17497092|k141_33398_flag=1_multi=217.0121_len=1878	Pisuviricota	d__Bacteria;p__Myxococcota;c__Polyangia;o__Nannocystales;f__Nannocystaceae;g__Ga0077550;s__Ga0077550 sp016709225	58	4	2.24e-16
100866361	SRR17509967|k141_44924_flag=1_multi=7.0000_len=2320	Pisuviricota	d__Bacteria;p__Myxococcota;c__Polyangia;o__Nannocystales;f__Nannocystaceae;g__Ga0077550;s__Ga0077550 sp016709225	39	3	1.76e-07
100866361	SRR11565437|k141_190787_flag=1_multi=8.0000_len=2964	Kitrinoviricota	d__Bacteria;p__Myxococcota;c__Polyangia;o__Nannocystales;f__Nannocystaceae;g__Ga0077550;s__Ga0077550 sp016709225	28	0	2.27e-06
100866361	SRR17481244|k141_92016_flag=1_multi=44.0000_len=3519	Lenarviricota	d__Bacteria;p__Myxococcota;c__Polyangia;o__Nannocystales;f__Nannocystaceae;g__Ga0077550;s__Ga0077550 sp016709225	34	0	1.05e-09
100866361	SRR17497049|k141_87067_flag=1_multi=464.0000_len=3624	Lenarviricota	d__Bacteria;p__Myxococcota;c__Polyangia;o__Nannocystales;f__Nannocystaceae;g__Ga0077550;s__Ga0077550 sp016709225	50	0	0.000106
100866361	SRR17497068|k141_144847_flag=1_multi=37.7881_len=1816	Pisuviricota	d__Bacteria;p__Myxococcota;c__Polyangia;o__Nannocystales;f__Nannocystaceae;g__Ga0077550;s__Ga0077550 sp016709225	61	4	4.82e-18
100866361	SRR17509979|k141_53443_flag=1_multi=169.8080_len=4630	Kitrinoviricota	d__Bacteria;p__Myxococcota;c__Polyangia;o__Nannocystales;f__Nannocystaceae;g__Ga0077550;s__Ga0077550 sp016709225	61	4	4.82e-18
100866361	SRR17509978|k141_113185_flag=1_multi=9.0000_len=1199	Pisuviricota	d__Bacteria;p__Myxococcota;c__Polyangia;o__Nannocystales;f__Nannocystaceae;g__Ga0077550;s__Ga0077550 sp016709225	36	3	8.18e-06
100866361	SRR17509978|k141_111246_flag=1_multi=25.3407_len=1855	Pisuviricota	d__Bacteria;p__Myxococcota;c__Polyangia;o__Nannocystales;f__Nannocystaceae;g__Ga0077550;s__Ga0077550 sp016709225	41	0	1.35e-13
100866361	SRR11829331|k141_332492_flag=1_multi=252.0000_len=4351	Lenarviricota	d__Bacteria;p__Myxococcota;c__Polyangia;o__Nannocystales;f__Nannocystaceae;g__Ga0077550;s__Ga0077550 sp016709225	61	4	4.82e-18
100866361	SRR17509979|k141_40329_flag=1_multi=17.0000_len=1013	Pisuviricota	d__Bacteria;p__Myxococcota;c__Polyangia;o__Nannocystales;f__Nannocystaceae;g__Ga0077550;s__Ga0077550 sp016709225	29	1	2.94e-05
100866361	SRR5829964|k141_20917_flag=1_multi=123.0000_len=1791	Kitrinoviricota	d__Bacteria;p__Myxococcota;c__Polyangia;o__Nannocystales;f__Nannocystaceae;g__Ga0077550;s__Ga0077550 sp016709225	31	2	0.000106
100866361	SRR17497069|k141_154292_flag=1_multi=166.0000_len=1714	Pisuviricota	d__Bacteria;p__Myxococcota;c__Polyangia;o__Nannocystales;f__Nannocystaceae;g__Ga0077550;s__Ga0077550 sp016709225	43	3	1.76e-07
100866361	SRR17497054|k141_191824_flag=1_multi=13.0000_len=2259	Pisuviricota	d__Bacteria;p__Myxococcota;c__Polyangia;o__Nannocystales;f__Nannocystaceae;g__Ga0077550;s__Ga0077550 sp016709225	40	0	4.85e-13
100866361	SRR11828805|k141_11533_flag=1_multi=89.8329_len=3648	Kitrinoviricota	d__Bacteria;p__Myxococcota;c__Polyangia;o__Nannocystales;f__Nannocystaceae;g__Ga0077550;s__Ga0077550 sp016709225	43	2	2.26e-11
100866361	BC-0345298860|k141_3179	Lenarviricota	d__Bacteria;p__Myxococcota;c__Polyangia;o__Nannocystales;f__Nannocystaceae;g__Ga0077550;s__Ga0077550 sp016709225	61	4	4.82e-18
100866361	SRR18770931|k141_53716_flag=1_multi=6.0000_len=1000	Lenarviricota	d__Bacteria;p__Myxococcota;c__Polyangia;o__Nannocystales;f__Nannocystaceae;g__Ga0077550;s__Ga0077550 sp016709225	38	3	6.32e-07
100866361	SRR17509979|k141_52575_flag=1_multi=83.6741_len=1804	Pisuviricota	d__Bacteria;p__Myxococcota;c__Polyangia;o__Nannocystales;f__Nannocystaceae;g__Ga0077550;s__Ga0077550 sp016709225	48	1	8.06e-16
100866361	SRR10849374|k141_218357_flag=1_multi=12.0000_len=3750	Lenarviricota	d__Bacteria;p__Myxococcota;c__Polyangia;o__Nannocystales;f__Nannocystaceae;g__Ga0077550;s__Ga0077550 sp016709225	34	0	1.05e-09
100866361	SRR17497126|k141_95757_flag=1_multi=826.0000_len=3116	Lenarviricota	d__Bacteria;p__Myxococcota;c__Polyangia;o__Nannocystales;f__Nannocystaceae;g__Ga0077550;s__Ga0077550 sp016709225	41	3	1.36e-08
100866361	SRR17497098|k141_13697_flag=1_multi=34.0000_len=1851	Pisuviricota	d__Bacteria;p__Myxococcota;c__Polyangia;o__Nannocystales;f__Nannocystaceae;g__Ga0077550;s__Ga0077550 sp016709225	67	4	1.05e-09
100866361	SRR17497064|k141_135790_flag=1_multi=52.0000_len=1739	Pisuviricota	d__Bacteria;p__Myxococcota;c__Polyangia;o__Nannocystales;f__Nannocystaceae;g__Ga0077550;s__Ga0077550 sp016709225	48	1	8.06e-16
100866361	SRR17509979|k141_28799_flag=1_multi=182.0000_len=1917	Pisuviricota	d__Bacteria;p__Myxococcota;c__Polyangia;o__Nannocystales;f__Nannocystaceae;g__Ga0077550;s__Ga0077550 sp016709225	48	1	8.06e-16
100866361	SRR17509977|k141_51278_flag=1_multi=666.0000_len=6190	Pisuviricota	d__Bacteria;p__Myxococcota;c__Polyangia;o__Nannocystales;f__Nannocystaceae;g__Ga0077550;s__Ga0077550 sp016709225	39	2	3.78e-09
100866361	SRR17481244|k141_53629_flag=1_multi=27.0000_len=3662	Lenarviricota	d__Bacteria;p__Myxococcota;c__Polyangia;o__Nannocystales;f__Nannocystaceae;g__Ga0077550;s__Ga0077550 sp016709225	41	2	2.92e-10
100866361	SRR17509977|k141_137261_flag=1_multi=15.0000_len=2450	Kitrinoviricota	d__Bacteria;p__Myxococcota;c__Polyangia;o__Nannocystales;f__Nannocystaceae;g__Ga0077550;s__Ga0077550 sp016709225	34	2	2.27e-06
100866361	SRR17509976|k141_100049_flag=1_multi=72.0000_len=1862	Pisuviricota	d__Bacteria;p__Myxococcota;c__Polyangia;o__Nannocystales;f__Nannocystaceae;g__Ga0077550;s__Ga0077550 sp016709225	40	3	4.89e-08
100866362	BC-0345298860|k141_3179	Lenarviricota	d__Bacteria;p__Myxococcota;c__Polyangia;o__Nannocystales;f__Nannocystaceae;g__Ga0077550;s__Ga0077550 sp016709225	61	4	5.21e-18
100866362	SRR17497063|k141_236251_flag=1_multi=918.6198_len=5775	Lenarviricota	d__Bacteria;p__Myxococcota;c__Polyangia;o__Nannocystales;f__Nannocystaceae;g__Ga0077550;s__Ga0077550 sp016709225	40	1	1.9e-07
100866362	SRR18771403|k141_131354_flag=1_multi=48.8407_len=10690	Pisuviricota	d__Bacteria;p__Myxococcota;c__Polyangia;o__Nannocystales;f__Nannocystaceae;g__Ga0077550;s__Ga0077550 sp016709225	58	3	5.21e-18
100866362	SRR17509979|k141_52575_flag=1_multi=83.6741_len=1804	Pisuviricota	d__Bacteria;p__Myxococcota;c__Polyangia;o__Nannocystales;f__Nannocystaceae;g__Ga0077550;s__Ga0077550 sp016709225	55	0	3.13e-15
100866362	SRR17509979|k141_40329_flag=1_multi=17.0000_len=1013	Pisuviricota	d__Bacteria;p__Myxococcota;c__Polyangia;o__Nannocystales;f__Nannocystaceae;g__Ga0077550;s__Ga0077550 sp016709225	32	0	2.46e-06
100866362	SRR17509978|k141_111246_flag=1_multi=25.3407_len=1855	Pisuviricota	d__Bacteria;p__Myxococcota;c__Polyangia;o__Nannocystales;f__Nannocystaceae;g__Ga0077550;s__Ga0077550 sp016709225	54	3	1.14e-09
100866362	SRR17497064|k141_128537_flag=1_multi=9.0000_len=1004	Pisuviricota	d__Bacteria;p__Myxococcota;c__Polyangia;o__Nannocystales;f__Nannocystaceae;g__Ga0077550;s__Ga0077550 sp016709225	33	0	3.18e-05
100866362	SRR17509979|k141_53443_flag=1_multi=169.8080_len=4630	Kitrinoviricota	d__Bacteria;p__Myxococcota;c__Polyangia;o__Nannocystales;f__Nannocystaceae;g__Ga0077550;s__Ga0077550 sp016709225	58	3	5.21e-18
100866362	SRR17497126|k141_68629_flag=1_multi=6.0000_len=1048	Pisuviricota	d__Bacteria;p__Myxococcota;c__Polyangia;o__Nannocystales;f__Nannocystaceae;g__Ga0077550;s__Ga0077550 sp016709225	24	0	0.000411
100866362	BC-0332570062|k141_61782	Lenarviricota	d__Bacteria;p__Myxococcota;c__Polyangia;o__Nannocystales;f__Nannocystaceae;g__Ga0077550;s__Ga0077550 sp016709225	39	1	6.83e-07
100866362	SRR11829331|k141_332492_flag=1_multi=252.0000_len=4351	Lenarviricota	d__Bacteria;p__Myxococcota;c__Polyangia;o__Nannocystales;f__Nannocystaceae;g__Ga0077550;s__Ga0077550 sp016709225	58	3	5.21e-18
100866362	SRR17509979|k141_54497_flag=1_multi=434.0000_len=1853	Pisuviricota	d__Bacteria;p__Myxococcota;c__Polyangia;o__Nannocystales;f__Nannocystaceae;g__Ga0077550;s__Ga0077550 sp016709225	58	3	5.21e-18
100866362	SRR17509940|k141_117101_flag=1_multi=38.0000_len=2457	Duplornaviricota	d__Bacteria;p__Myxococcota;c__Polyangia;o__Nannocystales;f__Nannocystaceae;g__Ga0077550;s__Ga0077550 sp016709225	27	0	8.84e-06
100866362	SRR17497126|k141_95757_flag=1_multi=826.0000_len=3116	Lenarviricota	d__Bacteria;p__Myxococcota;c__Polyangia;o__Nannocystales;f__Nannocystaceae;g__Ga0077550;s__Ga0077550 sp016709225	37	0	1.9e-07
100866362	SRR17509977|k141_51278_flag=1_multi=666.0000_len=6190	Pisuviricota	d__Bacteria;p__Myxococcota;c__Polyangia;o__Nannocystales;f__Nannocystaceae;g__Ga0077550;s__Ga0077550 sp016709225	34	2	2.46e-06
100866362	SRR17481242|k141_14860_flag=1_multi=140.0000_len=3974	Unclassified	d__Bacteria;p__Myxococcota;c__Polyangia;o__Nannocystales;f__Nannocystaceae;g__Ga0077550;s__Ga0077550 sp016709225	58	3	5.21e-18
100866362	SRR17497064|k141_135790_flag=1_multi=52.0000_len=1739	Pisuviricota	d__Bacteria;p__Myxococcota;c__Polyangia;o__Nannocystales;f__Nannocystaceae;g__Ga0077550;s__Ga0077550 sp016709225	55	0	3.13e-15
100866362	SRR17497068|k141_144847_flag=1_multi=37.7881_len=1816	Pisuviricota	d__Bacteria;p__Myxococcota;c__Polyangia;o__Nannocystales;f__Nannocystaceae;g__Ga0077550;s__Ga0077550 sp016709225	61	4	5.21e-18
100866362	SRR17497054|k141_191824_flag=1_multi=13.0000_len=2259	Pisuviricota	d__Bacteria;p__Myxococcota;c__Polyangia;o__Nannocystales;f__Nannocystaceae;g__Ga0077550;s__Ga0077550 sp016709225	53	6	3.16e-10
100866362	SRR11648360|k141_236875_flag=1_multi=13.0000_len=4864	urv.p.001	d__Bacteria;p__Myxococcota;c__Polyangia;o__Nannocystales;f__Nannocystaceae;g__Ga0077550;s__Ga0077550 sp016709225	30	0	1.9e-07
100866362	SRR17497092|k141_33398_flag=1_multi=217.0121_len=1878	Pisuviricota	d__Bacteria;p__Myxococcota;c__Polyangia;o__Nannocystales;f__Nannocystaceae;g__Ga0077550;s__Ga0077550 sp016709225	58	3	5.21e-18
100866362	SRR17481244|k141_53629_flag=1_multi=27.0000_len=3662	Lenarviricota	d__Bacteria;p__Myxococcota;c__Polyangia;o__Nannocystales;f__Nannocystaceae;g__Ga0077550;s__Ga0077550 sp016709225	43	1	4.08e-09
100866362	SRR10849374|k141_218357_flag=1_multi=12.0000_len=3750	Lenarviricota	d__Bacteria;p__Myxococcota;c__Polyangia;o__Nannocystales;f__Nannocystaceae;g__Ga0077550;s__Ga0077550 sp016709225	37	1	1.9e-07
100866362	SRR17481244|k141_92016_flag=1_multi=44.0000_len=3519	Lenarviricota	d__Bacteria;p__Myxococcota;c__Polyangia;o__Nannocystales;f__Nannocystaceae;g__Ga0077550;s__Ga0077550 sp016709225	36	1	6.83e-07
100866362	SRR17509979|k141_28799_flag=1_multi=182.0000_len=1917	Pisuviricota	d__Bacteria;p__Myxococcota;c__Polyangia;o__Nannocystales;f__Nannocystaceae;g__Ga0077550;s__Ga0077550 sp016709225	52	0	1.46e-13
100866362	SRR17497049|k141_87067_flag=1_multi=464.0000_len=3624	Lenarviricota	d__Bacteria;p__Myxococcota;c__Polyangia;o__Nannocystales;f__Nannocystaceae;g__Ga0077550;s__Ga0077550 sp016709225	48	6	3.18e-05
100866362	SRR14530880|k119_2620_flag=1_multi=62.0000_len=4380	Kitrinoviricota	d__Bacteria;p__Myxococcota;c__Polyangia;o__Nannocystales;f__Nannocystaceae;g__Ga0077550;s__Ga0077550 sp016709225	36	1	6.83e-07
100866362	SRR11450579|k141_22903_flag=1_multi=93.0000_len=8250	Pisuviricota	d__Bacteria;p__Myxococcota;c__Polyangia;o__Nannocystales;f__Nannocystaceae;g__Ga0077550;s__Ga0077550 sp016709225	27	0	8.84e-06
100866362	SRR17509979|k141_62709_flag=1_multi=44.0000_len=2751	Pisuviricota	d__Bacteria;p__Myxococcota;c__Polyangia;o__Nannocystales;f__Nannocystaceae;g__Ga0077550;s__Ga0077550 sp016709225	42	1	1.47e-08
100866362	SRR17509940|k141_147462_flag=1_multi=29.0000_len=3674	Unclassified	d__Bacteria;p__Myxococcota;c__Polyangia;o__Nannocystales;f__Nannocystaceae;g__Ga0077550;s__Ga0077550 sp016709225	37	1	8.84e-06
100866362	SRR11565437|k141_190787_flag=1_multi=8.0000_len=2964	Kitrinoviricota	d__Bacteria;p__Myxococcota;c__Polyangia;o__Nannocystales;f__Nannocystaceae;g__Ga0077550;s__Ga0077550 sp016709225	25	0	0.000114
100866362	SRR17509976|k141_164083_flag=1_multi=58.0000_len=4337	Pisuviricota	d__Bacteria;p__Myxococcota;c__Polyangia;o__Nannocystales;f__Nannocystaceae;g__Ga0077550;s__Ga0077550 sp016709225	38	2	2.46e-06
100866362	SRR17509979|k141_11840_flag=1_multi=73.0000_len=1384	Pisuviricota	d__Bacteria;p__Myxococcota;c__Polyangia;o__Nannocystales;f__Nannocystaceae;g__Ga0077550;s__Ga0077550 sp016709225	34	1	0.000411
100866362	SRR11828805|k141_11533_flag=1_multi=89.8329_len=3648	Kitrinoviricota	d__Bacteria;p__Myxococcota;c__Polyangia;o__Nannocystales;f__Nannocystaceae;g__Ga0077550;s__Ga0077550 sp016709225	44	3	5.28e-08
100866362	SRR17509977|k141_156580_flag=1_multi=3.0000_len=1406	Pisuviricota	d__Bacteria;p__Myxococcota;c__Polyangia;o__Nannocystales;f__Nannocystaceae;g__Ga0077550;s__Ga0077550 sp016709225	38	1	2.46e-06
100866362	SRR11648176|k141_298601_flag=1_multi=36.0000_len=3120	Kitrinoviricota	d__Bacteria;p__Myxococcota;c__Polyangia;o__Nannocystales;f__Nannocystaceae;g__Ga0077550;s__Ga0077550 sp016709225	59	3	1.45e-18
100866362	SRR17509967|k141_44924_flag=1_multi=7.0000_len=2320	Pisuviricota	d__Bacteria;p__Myxococcota;c__Polyangia;o__Nannocystales;f__Nannocystaceae;g__Ga0077550;s__Ga0077550 sp016709225	41	2	2.46e-06
100866362	SRR17497099|k141_59590_flag=1_multi=17.5683_len=1158	Pisuviricota	d__Bacteria;p__Myxococcota;c__Polyangia;o__Nannocystales;f__Nannocystaceae;g__Ga0077550;s__Ga0077550 sp016709225	48	3	3.16e-10
100866362	SRR5829964|k141_20917_flag=1_multi=123.0000_len=1791	Kitrinoviricota	d__Bacteria;p__Myxococcota;c__Polyangia;o__Nannocystales;f__Nannocystaceae;g__Ga0077550;s__Ga0077550 sp016709225	27	1	0.000411
100866362	SRR17497069|k141_154292_flag=1_multi=166.0000_len=1714	Pisuviricota	d__Bacteria;p__Myxococcota;c__Polyangia;o__Nannocystales;f__Nannocystaceae;g__Ga0077550;s__Ga0077550 sp016709225	45	3	6.83e-07
100866362	SRR10849744|k141_310535_flag=1_multi=101.0000_len=3955	Lenarviricota	d__Bacteria;p__Myxococcota;c__Polyangia;o__Nannocystales;f__Nannocystaceae;g__Ga0077550;s__Ga0077550 sp016709225	39	3	1.9e-07
100866371	BC-0345298860|k141_3179	Lenarviricota	d__Bacteria;p__Myxococcota;c__Polyangia;o__Nannocystales;f__Nannocystaceae;g__Ga0077550;s__Ga0077550 sp016709225	46	0	1.58e-16
100866371	SRR17497126|k141_132965_flag=1_multi=75.0000_len=1737	Pisuviricota	d__Bacteria;p__Myxococcota;c__Polyangia;o__Nannocystales;f__Nannocystaceae;g__Ga0077550;s__Ga0077550 sp016709225	23	0	0.001
100866371	SRR17509940|k141_117101_flag=1_multi=38.0000_len=2457	Duplornaviricota	d__Bacteria;p__Myxococcota;c__Polyangia;o__Nannocystales;f__Nannocystaceae;g__Ga0077550;s__Ga0077550 sp016709225	26	0	2.07e-05
100866371	SRR10849374|k141_218357_flag=1_multi=12.0000_len=3750	Lenarviricota	d__Bacteria;p__Myxococcota;c__Polyangia;o__Nannocystales;f__Nannocystaceae;g__Ga0077550;s__Ga0077550 sp016709225	34	0	7.38e-10
100866371	SRR14530880|k119_2620_flag=1_multi=62.0000_len=4380	Kitrinoviricota	d__Bacteria;p__Myxococcota;c__Polyangia;o__Nannocystales;f__Nannocystaceae;g__Ga0077550;s__Ga0077550 sp016709225	34	0	7.38e-10
100866371	SRR17497098|k141_13697_flag=1_multi=34.0000_len=1851	Pisuviricota	d__Bacteria;p__Myxococcota;c__Polyangia;o__Nannocystales;f__Nannocystaceae;g__Ga0077550;s__Ga0077550 sp016709225	44	3	2.05e-10
100866371	SRR17497126|k141_68629_flag=1_multi=6.0000_len=1048	Pisuviricota	d__Bacteria;p__Myxococcota;c__Polyangia;o__Nannocystales;f__Nannocystaceae;g__Ga0077550;s__Ga0077550 sp016709225	27	0	5.75e-06
100866371	SRR11828805|k141_11533_flag=1_multi=89.8329_len=3648	Kitrinoviricota	d__Bacteria;p__Myxococcota;c__Polyangia;o__Nannocystales;f__Nannocystaceae;g__Ga0077550;s__Ga0077550 sp016709225	43	2	1.59e-11
100866371	SRR17481242|k141_14860_flag=1_multi=140.0000_len=3974	Unclassified	d__Bacteria;p__Myxococcota;c__Polyangia;o__Nannocystales;f__Nannocystaceae;g__Ga0077550;s__Ga0077550 sp016709225	50	0	1.58e-16
100866371	SRR17497092|k141_33398_flag=1_multi=217.0121_len=1878	Pisuviricota	d__Bacteria;p__Myxococcota;c__Polyangia;o__Nannocystales;f__Nannocystaceae;g__Ga0077550;s__Ga0077550 sp016709225	45	0	5.67e-16
100866371	SRR11829331|k141_332492_flag=1_multi=252.0000_len=4351	Lenarviricota	d__Bacteria;p__Myxococcota;c__Polyangia;o__Nannocystales;f__Nannocystaceae;g__Ga0077550;s__Ga0077550 sp016709225	46	0	1.58e-16
100866371	SRR17509979|k141_16339_flag=1_multi=584.0000_len=1694	Pisuviricota	d__Bacteria;p__Myxococcota;c__Polyangia;o__Nannocystales;f__Nannocystaceae;g__Ga0077550;s__Ga0077550 sp016709225	33	3	0.000267
100866371	SRR11648176|k141_298601_flag=1_multi=36.0000_len=3120	Kitrinoviricota	d__Bacteria;p__Myxococcota;c__Polyangia;o__Nannocystales;f__Nannocystaceae;g__Ga0077550;s__Ga0077550 sp016709225	45	0	5.67e-16
100866371	SRR17509979|k141_48627_flag=1_multi=74.6250_len=1645	Pisuviricota	d__Bacteria;p__Myxococcota;c__Polyangia;o__Nannocystales;f__Nannocystaceae;g__Ga0077550;s__Ga0077550 sp016709225	27	1	0.000267
100866371	SRR11450579|k141_22903_flag=1_multi=93.0000_len=8250	Pisuviricota	d__Bacteria;p__Myxococcota;c__Polyangia;o__Nannocystales;f__Nannocystaceae;g__Ga0077550;s__Ga0077550 sp016709225	31	1	1.6e-06
100866371	SRR17509979|k141_54497_flag=1_multi=434.0000_len=1853	Pisuviricota	d__Bacteria;p__Myxococcota;c__Polyangia;o__Nannocystales;f__Nannocystaceae;g__Ga0077550;s__Ga0077550 sp016709225	45	0	5.67e-16
100866371	SRR17497049|k141_87067_flag=1_multi=464.0000_len=3624	Lenarviricota	d__Bacteria;p__Myxococcota;c__Polyangia;o__Nannocystales;f__Nannocystaceae;g__Ga0077550;s__Ga0077550 sp016709225	55	2	3.43e-08
100866371	SRR11565437|k141_190787_flag=1_multi=8.0000_len=2964	Kitrinoviricota	d__Bacteria;p__Myxococcota;c__Polyangia;o__Nannocystales;f__Nannocystaceae;g__Ga0077550;s__Ga0077550 sp016709225	28	1	7.43e-05
100866371	SRR10849744|k141_310535_flag=1_multi=101.0000_len=3955	Lenarviricota	d__Bacteria;p__Myxococcota;c__Polyangia;o__Nannocystales;f__Nannocystaceae;g__Ga0077550;s__Ga0077550 sp016709225	39	1	5.71e-11
100866371	SRR17497068|k141_144847_flag=1_multi=37.7881_len=1816	Pisuviricota	d__Bacteria;p__Myxococcota;c__Polyangia;o__Nannocystales;f__Nannocystaceae;g__Ga0077550;s__Ga0077550 sp016709225	46	0	1.58e-16
100866371	SRR17509979|k141_17026_flag=1_multi=263.6760_len=2576	Lenarviricota	d__Bacteria;p__Myxococcota;c__Polyangia;o__Nannocystales;f__Nannocystaceae;g__Ga0077550;s__Ga0077550 sp016709225	30	1	0.001
100866371	SRR17497064|k141_128537_flag=1_multi=9.0000_len=1004	Pisuviricota	d__Bacteria;p__Myxococcota;c__Polyangia;o__Nannocystales;f__Nannocystaceae;g__Ga0077550;s__Ga0077550 sp016709225	31	1	1.6e-06
100866371	SRR17509979|k141_52575_flag=1_multi=83.6741_len=1804	Pisuviricota	d__Bacteria;p__Myxococcota;c__Polyangia;o__Nannocystales;f__Nannocystaceae;g__Ga0077550;s__Ga0077550 sp016709225	50	1	4.38e-17
100866371	SRR17509979|k141_40329_flag=1_multi=17.0000_len=1013	Pisuviricota	d__Bacteria;p__Myxococcota;c__Polyangia;o__Nannocystales;f__Nannocystaceae;g__Ga0077550;s__Ga0077550 sp016709225	29	1	2.07e-05
100866371	SRR17509979|k141_53443_flag=1_multi=169.8080_len=4630	Kitrinoviricota	d__Bacteria;p__Myxococcota;c__Polyangia;o__Nannocystales;f__Nannocystaceae;g__Ga0077550;s__Ga0077550 sp016709225	46	0	1.58e-16
100866371	SRR18771403|k141_131354_flag=1_multi=48.8407_len=10690	Pisuviricota	d__Bacteria;p__Myxococcota;c__Polyangia;o__Nannocystales;f__Nannocystaceae;g__Ga0077550;s__Ga0077550 sp016709225	46	0	1.58e-16
100866371	SRR5829964|k141_20917_flag=1_multi=123.0000_len=1791	Kitrinoviricota	d__Bacteria;p__Myxococcota;c__Polyangia;o__Nannocystales;f__Nannocystaceae;g__Ga0077550;s__Ga0077550 sp016709225	31	2	7.43e-05
100866371	SRR17497064|k141_135790_flag=1_multi=52.0000_len=1739	Pisuviricota	d__Bacteria;p__Myxococcota;c__Polyangia;o__Nannocystales;f__Nannocystaceae;g__Ga0077550;s__Ga0077550 sp016709225	45	0	5.67e-16
100866371	SRR17509979|k141_28799_flag=1_multi=182.0000_len=1917	Pisuviricota	d__Bacteria;p__Myxococcota;c__Polyangia;o__Nannocystales;f__Nannocystaceae;g__Ga0077550;s__Ga0077550 sp016709225	46	0	1.58e-16
100866371	SRR17509979|k141_62709_flag=1_multi=44.0000_len=2751	Pisuviricota	d__Bacteria;p__Myxococcota;c__Polyangia;o__Nannocystales;f__Nannocystaceae;g__Ga0077550;s__Ga0077550 sp016709225	43	2	1.59e-11
100866371	SRR17481244|k141_92016_flag=1_multi=44.0000_len=3519	Lenarviricota	d__Bacteria;p__Myxococcota;c__Polyangia;o__Nannocystales;f__Nannocystaceae;g__Ga0077550;s__Ga0077550 sp016709225	34	0	7.38e-10
100866371	BC-0332570062|k141_61782	Lenarviricota	d__Bacteria;p__Myxococcota;c__Polyangia;o__Nannocystales;f__Nannocystaceae;g__Ga0077550;s__Ga0077550 sp016709225	40	2	7.38e-10
100866371	SRR11648360|k141_236875_flag=1_multi=13.0000_len=4864	urv.p.001	d__Bacteria;p__Myxococcota;c__Polyangia;o__Nannocystales;f__Nannocystaceae;g__Ga0077550;s__Ga0077550 sp016709225	28	0	1.6e-06
100866371	SRR17509977|k141_51278_flag=1_multi=666.0000_len=6190	Pisuviricota	d__Bacteria;p__Myxococcota;c__Polyangia;o__Nannocystales;f__Nannocystaceae;g__Ga0077550;s__Ga0077550 sp016709225	38	1	2.05e-10
100866371	SRR17497126|k141_95757_flag=1_multi=826.0000_len=3116	Lenarviricota	d__Bacteria;p__Myxococcota;c__Polyangia;o__Nannocystales;f__Nannocystaceae;g__Ga0077550;s__Ga0077550 sp016709225	41	3	9.55e-09
100866371	SRR18770931|k141_53716_flag=1_multi=6.0000_len=1000	Lenarviricota	d__Bacteria;p__Myxococcota;c__Polyangia;o__Nannocystales;f__Nannocystaceae;g__Ga0077550;s__Ga0077550 sp016709225	39	3	1.24e-07
100866371	SRR17509978|k141_111246_flag=1_multi=25.3407_len=1855	Pisuviricota	d__Bacteria;p__Myxococcota;c__Polyangia;o__Nannocystales;f__Nannocystaceae;g__Ga0077550;s__Ga0077550 sp016709225	41	0	9.48e-14
100866371	SRR17509979|k141_9417_flag=1_multi=17.0000_len=1700	Pisuviricota	d__Bacteria;p__Myxococcota;c__Polyangia;o__Nannocystales;f__Nannocystaceae;g__Ga0077550;s__Ga0077550 sp016709225	24	0	0.000267
100866371	SRR17509976|k141_164083_flag=1_multi=58.0000_len=4337	Pisuviricota	d__Bacteria;p__Myxococcota;c__Polyangia;o__Nannocystales;f__Nannocystaceae;g__Ga0077550;s__Ga0077550 sp016709225	34	2	1.6e-06
100866371	SRR17497054|k141_191824_flag=1_multi=13.0000_len=2259	Pisuviricota	d__Bacteria;p__Myxococcota;c__Polyangia;o__Nannocystales;f__Nannocystaceae;g__Ga0077550;s__Ga0077550 sp016709225	40	0	3.41e-13
100866371	SRR17481245|k141_34522_flag=1_multi=17.0000_len=1572	Pisuviricota	d__Bacteria;p__Myxococcota;c__Polyangia;o__Nannocystales;f__Nannocystaceae;g__Ga0077550;s__Ga0077550 sp016709225	37	4	7.43e-05
100866371	SRR7540567|k141_243458_flag=1_multi=148.0000_len=2735	Kitrinoviricota	d__Bacteria;p__Myxococcota;c__Polyangia;o__Nannocystales;f__Nannocystaceae;g__Ga0077550;s__Ga0077550 sp016709225	27	1	0.000267
100866371	SRR17497069|k141_154292_flag=1_multi=166.0000_len=1714	Pisuviricota	d__Bacteria;p__Myxococcota;c__Polyangia;o__Nannocystales;f__Nannocystaceae;g__Ga0077550;s__Ga0077550 sp016709225	48	4	9.55e-09
100866371	SRR17481244|k141_53629_flag=1_multi=27.0000_len=3662	Lenarviricota	d__Bacteria;p__Myxococcota;c__Polyangia;o__Nannocystales;f__Nannocystaceae;g__Ga0077550;s__Ga0077550 sp016709225	45	2	2.05e-10
100866371	SRR17509979|k141_29393_flag=1_multi=7.5522_len=1032	Pisuviricota	d__Bacteria;p__Myxococcota;c__Polyangia;o__Nannocystales;f__Nannocystaceae;g__Ga0077550;s__Ga0077550 sp016709225	31	1	0.000267
100866371	SRR17509940|k141_147462_flag=1_multi=29.0000_len=3674	Unclassified	d__Bacteria;p__Myxococcota;c__Polyangia;o__Nannocystales;f__Nannocystaceae;g__Ga0077550;s__Ga0077550 sp016709225	35	2	4.44e-07
100866371	SRR17509967|k141_44924_flag=1_multi=7.0000_len=2320	Pisuviricota	d__Bacteria;p__Myxococcota;c__Polyangia;o__Nannocystales;f__Nannocystaceae;g__Ga0077550;s__Ga0077550 sp016709225	39	3	1.24e-07
100866371	SRR17509978|k141_113185_flag=1_multi=9.0000_len=1199	Pisuviricota	d__Bacteria;p__Myxococcota;c__Polyangia;o__Nannocystales;f__Nannocystaceae;g__Ga0077550;s__Ga0077550 sp016709225	35	2	4.44e-07
100866371	SRR17509979|k141_11840_flag=1_multi=73.0000_len=1384	Pisuviricota	d__Bacteria;p__Myxococcota;c__Polyangia;o__Nannocystales;f__Nannocystaceae;g__Ga0077550;s__Ga0077550 sp016709225	32	2	2.07e-05
100866371	SRR17509979|k141_46350_flag=1_multi=13.0000_len=1813	Pisuviricota	d__Bacteria;p__Myxococcota;c__Polyangia;o__Nannocystales;f__Nannocystaceae;g__Ga0077550;s__Ga0077550 sp016709225	26	1	0.001
100866371	SRR17509977|k141_156580_flag=1_multi=3.0000_len=1406	Pisuviricota	d__Bacteria;p__Myxococcota;c__Polyangia;o__Nannocystales;f__Nannocystaceae;g__Ga0077550;s__Ga0077550 sp016709225	39	1	9.55e-09
100866371	SRR17509979|k141_46479_flag=1_multi=209.0000_len=2561	Pisuviricota	d__Bacteria;p__Myxococcota;c__Polyangia;o__Nannocystales;f__Nannocystaceae;g__Ga0077550;s__Ga0077550 sp016709225	26	1	0.001
100866371	SRR17509976|k141_100049_flag=1_multi=72.0000_len=1862	Pisuviricota	d__Bacteria;p__Myxococcota;c__Polyangia;o__Nannocystales;f__Nannocystaceae;g__Ga0077550;s__Ga0077550 sp016709225	42	2	9.55e-09
100866372	SRR11648360|k141_236875_flag=1_multi=13.0000_len=4864	urv.p.001	d__Bacteria;p__Myxococcota;c__Polyangia;o__Nannocystales;f__Nannocystaceae;g__Ga0077550;s__Ga0077550 sp016709225	28	0	2.15e-06
100866372	SRR5829964|k141_20917_flag=1_multi=123.0000_len=1791	Kitrinoviricota	d__Bacteria;p__Myxococcota;c__Polyangia;o__Nannocystales;f__Nannocystaceae;g__Ga0077550;s__Ga0077550 sp016709225	32	2	2.78e-05
100866372	SRR17497092|k141_33398_flag=1_multi=217.0121_len=1878	Pisuviricota	d__Bacteria;p__Myxococcota;c__Polyangia;o__Nannocystales;f__Nannocystaceae;g__Ga0077550;s__Ga0077550 sp016709225	55	4	9.87e-15
100866372	SRR11450579|k141_22903_flag=1_multi=93.0000_len=8250	Pisuviricota	d__Bacteria;p__Myxococcota;c__Polyangia;o__Nannocystales;f__Nannocystaceae;g__Ga0077550;s__Ga0077550 sp016709225	28	0	2.15e-06
100866372	SRR17497126|k141_68629_flag=1_multi=6.0000_len=1048	Pisuviricota	d__Bacteria;p__Myxococcota;c__Polyangia;o__Nannocystales;f__Nannocystaceae;g__Ga0077550;s__Ga0077550 sp016709225	24	0	0.00036
100866372	SRR17509979|k141_62709_flag=1_multi=44.0000_len=2751	Pisuviricota	d__Bacteria;p__Myxococcota;c__Polyangia;o__Nannocystales;f__Nannocystaceae;g__Ga0077550;s__Ga0077550 sp016709225	34	0	1.66e-07
100866372	SRR17509979|k141_53443_flag=1_multi=169.8080_len=4630	Kitrinoviricota	d__Bacteria;p__Myxococcota;c__Polyangia;o__Nannocystales;f__Nannocystaceae;g__Ga0077550;s__Ga0077550 sp016709225	55	4	9.87e-15
100866372	SRR17509979|k141_28799_flag=1_multi=182.0000_len=1917	Pisuviricota	d__Bacteria;p__Myxococcota;c__Polyangia;o__Nannocystales;f__Nannocystaceae;g__Ga0077550;s__Ga0077550 sp016709225	49	3	4.59e-13
100866372	SRR17509940|k141_117101_flag=1_multi=38.0000_len=2457	Duplornaviricota	d__Bacteria;p__Myxococcota;c__Polyangia;o__Nannocystales;f__Nannocystaceae;g__Ga0077550;s__Ga0077550 sp016709225	26	0	2.78e-05
100866372	BC-0345298860|k141_3179	Lenarviricota	d__Bacteria;p__Myxococcota;c__Polyangia;o__Nannocystales;f__Nannocystaceae;g__Ga0077550;s__Ga0077550 sp016709225	55	4	9.87e-15
100866372	SRR17497126|k141_95757_flag=1_multi=826.0000_len=3116	Lenarviricota	d__Bacteria;p__Myxococcota;c__Polyangia;o__Nannocystales;f__Nannocystaceae;g__Ga0077550;s__Ga0077550 sp016709225	34	0	1.66e-07
100866372	SRR17509967|k141_44924_flag=1_multi=7.0000_len=2320	Pisuviricota	d__Bacteria;p__Myxococcota;c__Polyangia;o__Nannocystales;f__Nannocystaceae;g__Ga0077550;s__Ga0077550 sp016709225	39	3	1.66e-07
100866372	SRR17509977|k141_51278_flag=1_multi=666.0000_len=6190	Pisuviricota	d__Bacteria;p__Myxococcota;c__Polyangia;o__Nannocystales;f__Nannocystaceae;g__Ga0077550;s__Ga0077550 sp016709225	39	3	1.66e-07
100866372	SRR17481244|k141_53629_flag=1_multi=27.0000_len=3662	Lenarviricota	d__Bacteria;p__Myxococcota;c__Polyangia;o__Nannocystales;f__Nannocystaceae;g__Ga0077550;s__Ga0077550 sp016709225	47	3	9.94e-10
100866372	SRR17497068|k141_144847_flag=1_multi=37.7881_len=1816	Pisuviricota	d__Bacteria;p__Myxococcota;c__Polyangia;o__Nannocystales;f__Nannocystaceae;g__Ga0077550;s__Ga0077550 sp016709225	55	4	9.87e-15
100866372	SRR17497049|k141_87067_flag=1_multi=464.0000_len=3624	Lenarviricota	d__Bacteria;p__Myxococcota;c__Polyangia;o__Nannocystales;f__Nannocystaceae;g__Ga0077550;s__Ga0077550 sp016709225	48	2	0.00036
100866372	SRR11565437|k141_190787_flag=1_multi=8.0000_len=2964	Kitrinoviricota	d__Bacteria;p__Myxococcota;c__Polyangia;o__Nannocystales;f__Nannocystaceae;g__Ga0077550;s__Ga0077550 sp016709225	49	6	4.62e-08
100866372	SRR17481242|k141_14860_flag=1_multi=140.0000_len=3974	Unclassified	d__Bacteria;p__Myxococcota;c__Polyangia;o__Nannocystales;f__Nannocystaceae;g__Ga0077550;s__Ga0077550 sp016709225	55	4	9.87e-15
100866372	SRR17481245|k141_34522_flag=1_multi=17.0000_len=1572	Pisuviricota	d__Bacteria;p__Myxococcota;c__Polyangia;o__Nannocystales;f__Nannocystaceae;g__Ga0077550;s__Ga0077550 sp016709225	27	1	0.00036
100866372	SRR17509979|k141_40329_flag=1_multi=17.0000_len=1013	Pisuviricota	d__Bacteria;p__Myxococcota;c__Polyangia;o__Nannocystales;f__Nannocystaceae;g__Ga0077550;s__Ga0077550 sp016709225	30	1	7.74e-06
100866372	SRR17481244|k141_92016_flag=1_multi=44.0000_len=3519	Lenarviricota	d__Bacteria;p__Myxococcota;c__Polyangia;o__Nannocystales;f__Nannocystaceae;g__Ga0077550;s__Ga0077550 sp016709225	33	0	3.57e-09
100866372	SRR18771403|k141_131354_flag=1_multi=48.8407_len=10690	Pisuviricota	d__Bacteria;p__Myxococcota;c__Polyangia;o__Nannocystales;f__Nannocystaceae;g__Ga0077550;s__Ga0077550 sp016709225	55	4	9.87e-15
100866372	SRR17497054|k141_191824_flag=1_multi=13.0000_len=2259	Pisuviricota	d__Bacteria;p__Myxococcota;c__Polyangia;o__Nannocystales;f__Nannocystaceae;g__Ga0077550;s__Ga0077550 sp016709225	56	6	9.94e-10
100866372	BC-0332570062|k141_61782	Lenarviricota	d__Bacteria;p__Myxococcota;c__Polyangia;o__Nannocystales;f__Nannocystaceae;g__Ga0077550;s__Ga0077550 sp016709225	36	1	3.57e-09
100866372	SRR17497064|k141_135790_flag=1_multi=52.0000_len=1739	Pisuviricota	d__Bacteria;p__Myxococcota;c__Polyangia;o__Nannocystales;f__Nannocystaceae;g__Ga0077550;s__Ga0077550 sp016709225	54	2	1.28e-13
100866372	SRR17497064|k141_128537_flag=1_multi=9.0000_len=1004	Pisuviricota	d__Bacteria;p__Myxococcota;c__Polyangia;o__Nannocystales;f__Nannocystaceae;g__Ga0077550;s__Ga0077550 sp016709225	32	1	5.98e-07
100866372	SRR11829331|k141_332492_flag=1_multi=252.0000_len=4351	Lenarviricota	d__Bacteria;p__Myxococcota;c__Polyangia;o__Nannocystales;f__Nannocystaceae;g__Ga0077550;s__Ga0077550 sp016709225	55	4	9.87e-15
100866372	SRR17509977|k141_156580_flag=1_multi=3.0000_len=1406	Pisuviricota	d__Bacteria;p__Myxococcota;c__Polyangia;o__Nannocystales;f__Nannocystaceae;g__Ga0077550;s__Ga0077550 sp016709225	37	1	1.66e-07
100866372	SRR10849374|k141_218357_flag=1_multi=12.0000_len=3750	Lenarviricota	d__Bacteria;p__Myxococcota;c__Polyangia;o__Nannocystales;f__Nannocystaceae;g__Ga0077550;s__Ga0077550 sp016709225	33	0	3.57e-09
100866372	SRR11828805|k141_11533_flag=1_multi=89.8329_len=3648	Kitrinoviricota	d__Bacteria;p__Myxococcota;c__Polyangia;o__Nannocystales;f__Nannocystaceae;g__Ga0077550;s__Ga0077550 sp016709225	45	1	2.76e-10
100866372	SRR17509979|k141_54497_flag=1_multi=434.0000_len=1853	Pisuviricota	d__Bacteria;p__Myxococcota;c__Polyangia;o__Nannocystales;f__Nannocystaceae;g__Ga0077550;s__Ga0077550 sp016709225	55	4	9.87e-15
100866372	SRR17509979|k141_11840_flag=1_multi=73.0000_len=1384	Pisuviricota	d__Bacteria;p__Myxococcota;c__Polyangia;o__Nannocystales;f__Nannocystaceae;g__Ga0077550;s__Ga0077550 sp016709225	33	1	2.78e-05
100866372	SRR17509976|k141_164083_flag=1_multi=58.0000_len=4337	Pisuviricota	d__Bacteria;p__Myxococcota;c__Polyangia;o__Nannocystales;f__Nannocystaceae;g__Ga0077550;s__Ga0077550 sp016709225	35	0	2.15e-06
100866372	SRR11648176|k141_298601_flag=1_multi=36.0000_len=3120	Kitrinoviricota	d__Bacteria;p__Myxococcota;c__Polyangia;o__Nannocystales;f__Nannocystaceae;g__Ga0077550;s__Ga0077550 sp016709225	55	4	9.87e-15
100866372	SRR17509977|k141_137261_flag=1_multi=15.0000_len=2450	Kitrinoviricota	d__Bacteria;p__Myxococcota;c__Polyangia;o__Nannocystales;f__Nannocystaceae;g__Ga0077550;s__Ga0077550 sp016709225	35	0	2.15e-06
100866372	SRR14530880|k119_2620_flag=1_multi=62.0000_len=4380	Kitrinoviricota	d__Bacteria;p__Myxococcota;c__Polyangia;o__Nannocystales;f__Nannocystaceae;g__Ga0077550;s__Ga0077550 sp016709225	46	3	3.57e-09
100866372	SRR17509978|k141_113185_flag=1_multi=9.0000_len=1199	Pisuviricota	d__Bacteria;p__Myxococcota;c__Polyangia;o__Nannocystales;f__Nannocystaceae;g__Ga0077550;s__Ga0077550 sp016709225	33	1	2.78e-05
100866372	SRR10849744|k141_310535_flag=1_multi=101.0000_len=3955	Lenarviricota	d__Bacteria;p__Myxococcota;c__Polyangia;o__Nannocystales;f__Nannocystaceae;g__Ga0077550;s__Ga0077550 sp016709225	34	0	9.94e-10
100866372	SRR17509978|k141_111246_flag=1_multi=25.3407_len=1855	Pisuviricota	d__Bacteria;p__Myxococcota;c__Polyangia;o__Nannocystales;f__Nannocystaceae;g__Ga0077550;s__Ga0077550 sp016709225	53	4	9.94e-10
100866373	SRR11450579|k141_22903_flag=1_multi=93.0000_len=8250	Pisuviricota	d__Bacteria;p__Myxococcota;c__Polyangia;o__Nannocystales;f__Nannocystaceae;g__Ga0077550;s__Ga0077550 sp016709225	27	0	1.04e-05
100866373	SRR17497126|k141_68629_flag=1_multi=6.0000_len=1048	Pisuviricota	d__Bacteria;p__Myxococcota;c__Polyangia;o__Nannocystales;f__Nannocystaceae;g__Ga0077550;s__Ga0077550 sp016709225	24	0	0.000483
100866373	SRR5829964|k141_20917_flag=1_multi=123.0000_len=1791	Kitrinoviricota	d__Bacteria;p__Myxococcota;c__Polyangia;o__Nannocystales;f__Nannocystaceae;g__Ga0077550;s__Ga0077550 sp016709225	31	1	0.000483
100866373	SRR18771403|k141_131354_flag=1_multi=48.8407_len=10690	Pisuviricota	d__Bacteria;p__Myxococcota;c__Polyangia;o__Nannocystales;f__Nannocystaceae;g__Ga0077550;s__Ga0077550 sp016709225	60	5	1.02e-15
100866373	SRR11648360|k141_236875_flag=1_multi=13.0000_len=4864	urv.p.001	d__Bacteria;p__Myxococcota;c__Polyangia;o__Nannocystales;f__Nannocystaceae;g__Ga0077550;s__Ga0077550 sp016709225	31	0	6.21e-08
100866373	SRR17497126|k141_95757_flag=1_multi=826.0000_len=3116	Lenarviricota	d__Bacteria;p__Myxococcota;c__Polyangia;o__Nannocystales;f__Nannocystaceae;g__Ga0077550;s__Ga0077550 sp016709225	32	0	2.89e-06
100866373	SRR17481244|k141_92016_flag=1_multi=44.0000_len=3519	Lenarviricota	d__Bacteria;p__Myxococcota;c__Polyangia;o__Nannocystales;f__Nannocystaceae;g__Ga0077550;s__Ga0077550 sp016709225	31	0	6.21e-08
100866373	BC-0332570062|k141_61782	Lenarviricota	d__Bacteria;p__Myxococcota;c__Polyangia;o__Nannocystales;f__Nannocystaceae;g__Ga0077550;s__Ga0077550 sp016709225	31	0	6.21e-08
100866373	SRR17509978|k141_111246_flag=1_multi=25.3407_len=1855	Pisuviricota	d__Bacteria;p__Myxococcota;c__Polyangia;o__Nannocystales;f__Nannocystaceae;g__Ga0077550;s__Ga0077550 sp016709225	43	0	1.03e-10
100866373	SRR17497064|k141_128537_flag=1_multi=9.0000_len=1004	Pisuviricota	d__Bacteria;p__Myxococcota;c__Polyangia;o__Nannocystales;f__Nannocystaceae;g__Ga0077550;s__Ga0077550 sp016709225	31	1	2.89e-06
100866373	SRR17509979|k141_62709_flag=1_multi=44.0000_len=2751	Pisuviricota	d__Bacteria;p__Myxococcota;c__Polyangia;o__Nannocystales;f__Nannocystaceae;g__Ga0077550;s__Ga0077550 sp016709225	42	1	1.73e-08
100866373	SRR17509976|k141_164083_flag=1_multi=58.0000_len=4337	Pisuviricota	d__Bacteria;p__Myxococcota;c__Polyangia;o__Nannocystales;f__Nannocystaceae;g__Ga0077550;s__Ga0077550 sp016709225	34	2	2.89e-06
100866373	SRR17497049|k141_87067_flag=1_multi=464.0000_len=3624	Lenarviricota	d__Bacteria;p__Myxococcota;c__Polyangia;o__Nannocystales;f__Nannocystaceae;g__Ga0077550;s__Ga0077550 sp016709225	24	0	0.000483
100866373	SRR10849374|k141_218357_flag=1_multi=12.0000_len=3750	Lenarviricota	d__Bacteria;p__Myxococcota;c__Polyangia;o__Nannocystales;f__Nannocystaceae;g__Ga0077550;s__Ga0077550 sp016709225	31	0	6.21e-08
100866373	SRR17497068|k141_144847_flag=1_multi=37.7881_len=1816	Pisuviricota	d__Bacteria;p__Myxococcota;c__Polyangia;o__Nannocystales;f__Nannocystaceae;g__Ga0077550;s__Ga0077550 sp016709225	72	7	4.73e-19
100866373	SRR17509940|k141_117101_flag=1_multi=38.0000_len=2457	Duplornaviricota	d__Bacteria;p__Myxococcota;c__Polyangia;o__Nannocystales;f__Nannocystaceae;g__Ga0077550;s__Ga0077550 sp016709225	27	0	1.04e-05
100866373	SRR17509979|k141_28799_flag=1_multi=182.0000_len=1917	Pisuviricota	d__Bacteria;p__Myxococcota;c__Polyangia;o__Nannocystales;f__Nannocystaceae;g__Ga0077550;s__Ga0077550 sp016709225	51	3	7.97e-12
100866373	SRR11828805|k141_11533_flag=1_multi=89.8329_len=3648	Kitrinoviricota	d__Bacteria;p__Myxococcota;c__Polyangia;o__Nannocystales;f__Nannocystaceae;g__Ga0077550;s__Ga0077550 sp016709225	42	1	3.71e-10
100866373	SRR10849744|k141_310535_flag=1_multi=101.0000_len=3955	Lenarviricota	d__Bacteria;p__Myxococcota;c__Polyangia;o__Nannocystales;f__Nannocystaceae;g__Ga0077550;s__Ga0077550 sp016709225	41	1	6.21e-08
100866373	SRR17509979|k141_54497_flag=1_multi=434.0000_len=1853	Pisuviricota	d__Bacteria;p__Myxococcota;c__Polyangia;o__Nannocystales;f__Nannocystaceae;g__Ga0077550;s__Ga0077550 sp016709225	60	5	1.02e-15
100866373	SRR11648176|k141_298601_flag=1_multi=36.0000_len=3120	Kitrinoviricota	d__Bacteria;p__Myxococcota;c__Polyangia;o__Nannocystales;f__Nannocystaceae;g__Ga0077550;s__Ga0077550 sp016709225	63	3	7.91e-17
100866373	BC-0345298860|k141_3179	Lenarviricota	d__Bacteria;p__Myxococcota;c__Polyangia;o__Nannocystales;f__Nannocystaceae;g__Ga0077550;s__Ga0077550 sp016709225	72	7	4.73e-19
100866373	SRR17509979|k141_53443_flag=1_multi=169.8080_len=4630	Kitrinoviricota	d__Bacteria;p__Myxococcota;c__Polyangia;o__Nannocystales;f__Nannocystaceae;g__Ga0077550;s__Ga0077550 sp016709225	72	4	6.12e-18
100866373	SRR17509977|k141_156580_flag=1_multi=3.0000_len=1406	Pisuviricota	d__Bacteria;p__Myxococcota;c__Polyangia;o__Nannocystales;f__Nannocystaceae;g__Ga0077550;s__Ga0077550 sp016709225	32	0	2.89e-06
100866373	SRR17509978|k141_113185_flag=1_multi=9.0000_len=1199	Pisuviricota	d__Bacteria;p__Myxococcota;c__Polyangia;o__Nannocystales;f__Nannocystaceae;g__Ga0077550;s__Ga0077550 sp016709225	33	0	3.73e-05
100866373	SRR11450585|k141_260925_flag=1_multi=20.0000_len=6420	Unclassified	d__Bacteria;p__Myxococcota;c__Polyangia;o__Nannocystales;f__Nannocystaceae;g__Ga0077550;s__Ga0077550 sp016709225	76	6	2.87e-11
100866373	SRR17497092|k141_33398_flag=1_multi=217.0121_len=1878	Pisuviricota	d__Bacteria;p__Myxococcota;c__Polyangia;o__Nannocystales;f__Nannocystaceae;g__Ga0077550;s__Ga0077550 sp016709225	60	3	3.68e-15
100866373	SRR17509977|k141_51278_flag=1_multi=666.0000_len=6190	Pisuviricota	d__Bacteria;p__Myxococcota;c__Polyangia;o__Nannocystales;f__Nannocystaceae;g__Ga0077550;s__Ga0077550 sp016709225	41	1	6.21e-08
100866373	SRR17497064|k141_135790_flag=1_multi=52.0000_len=1739	Pisuviricota	d__Bacteria;p__Myxococcota;c__Polyangia;o__Nannocystales;f__Nannocystaceae;g__Ga0077550;s__Ga0077550 sp016709225	55	5	6.16e-13
100866373	SRR11829331|k141_332492_flag=1_multi=252.0000_len=4351	Lenarviricota	d__Bacteria;p__Myxococcota;c__Polyangia;o__Nannocystales;f__Nannocystaceae;g__Ga0077550;s__Ga0077550 sp016709225	72	7	4.73e-19
100866373	SRR17481242|k141_14860_flag=1_multi=140.0000_len=3974	Unclassified	d__Bacteria;p__Myxococcota;c__Polyangia;o__Nannocystales;f__Nannocystaceae;g__Ga0077550;s__Ga0077550 sp016709225	72	0	7.91e-17
100866373	SRR17509979|k141_52575_flag=1_multi=83.6741_len=1804	Pisuviricota	d__Bacteria;p__Myxococcota;c__Polyangia;o__Nannocystales;f__Nannocystaceae;g__Ga0077550;s__Ga0077550 sp016709225	57	0	2.22e-12
100866373	SRR14530880|k119_2620_flag=1_multi=62.0000_len=4380	Kitrinoviricota	d__Bacteria;p__Myxococcota;c__Polyangia;o__Nannocystales;f__Nannocystaceae;g__Ga0077550;s__Ga0077550 sp016709225	41	2	3.71e-10
100866373	SRR17509979|k141_11840_flag=1_multi=73.0000_len=1384	Pisuviricota	d__Bacteria;p__Myxococcota;c__Polyangia;o__Nannocystales;f__Nannocystaceae;g__Ga0077550;s__Ga0077550 sp016709225	32	1	0.000134
100866373	SRR17509967|k141_44924_flag=1_multi=7.0000_len=2320	Pisuviricota	d__Bacteria;p__Myxococcota;c__Polyangia;o__Nannocystales;f__Nannocystaceae;g__Ga0077550;s__Ga0077550 sp016709225	39	4	1.04e-05
100866373	SRR17509979|k141_40329_flag=1_multi=17.0000_len=1013	Pisuviricota	d__Bacteria;p__Myxococcota;c__Polyangia;o__Nannocystales;f__Nannocystaceae;g__Ga0077550;s__Ga0077550 sp016709225	32	2	3.73e-05
100866373	SRR18770931|k141_53716_flag=1_multi=6.0000_len=1000	Lenarviricota	d__Bacteria;p__Myxococcota;c__Polyangia;o__Nannocystales;f__Nannocystaceae;g__Ga0077550;s__Ga0077550 sp016709225	39	3	3.73e-05
100870571	SRR11829261|k141_152797_flag=1_multi=151.2792_len=2526	Kitrinoviricota	d__Bacteria;p__Firmicutes_A;c__Clostridia;o__Peptostreptococcales;f__Peptostreptococcaceae;g__Clostridioides;s__Clostridioides difficile	25	0	4.29e-05
100877085	SRR11829261|k141_152797_flag=1_multi=151.2792_len=2526	Kitrinoviricota	d__Bacteria;p__Firmicutes_A;c__Clostridia;o__Peptostreptococcales;f__Peptostreptococcaceae;g__Clostridioides;s__Clostridioides difficile	25	0	4.29e-05
100898348	SRR11827439|k141_109350_flag=1_multi=4.0000_len=2497	Duplornaviricota	d__Bacteria;p__Firmicutes_A;c__Clostridia;o__Peptostreptococcales;f__Peptostreptococcaceae;g__Clostridioides;s__Clostridioides difficile	26	1	0.000481
100901208	SRR11828959|k141_10571_flag=0_multi=44.0000_len=3000	Kitrinoviricota	d__Bacteria;p__Firmicutes;c__Bacilli;o__Lactobacillales;f__Carnobacteriaceae;g__Dolosigranulum;s__Dolosigranulum pigrum	23	0	0.000296
100902317	SRR11648413|k141_155839_flag=0_multi=32.5524_len=1714	Lenarviricota	d__Bacteria;p__Proteobacteria;c__Gammaproteobacteria;o__Enterobacterales;f__Enterobacteriaceae;g__Salmonella;s__Salmonella enterica	23	0	0.000333
100902924	SRR11829143|k141_198256_flag=1_multi=13.1560_len=8536	Pisuviricota	d__Bacteria;p__Firmicutes;c__Bacilli;o__Bacillales;f__Bacillaceae_G;g__Bacillus_A;s__Bacillus_A cytotoxicus	23	0	0.000296
100909204	SRR11828459|k141_18049_flag=1_multi=4.0000_len=1029	Duplornaviricota	d__Bacteria;p__Firmicutes_A;c__Clostridia;o__Peptostreptococcales;f__Peptostreptococcaceae;g__Clostridioides;s__Clostridioides difficile	29	1	1.11e-05
100909521	BC-0345297694|k141_68638	Kitrinoviricota	d__Bacteria;p__Proteobacteria;c__Gammaproteobacteria;o__Burkholderiales;f__SCOH01;g__Chitinivorax;s__Chitinivorax tropicus	26	1	0.000407
100913092	SRR11829261|k141_152797_flag=1_multi=151.2792_len=2526	Kitrinoviricota	d__Bacteria;p__Firmicutes_A;c__Clostridia;o__Peptostreptococcales;f__Peptostreptococcaceae;g__Clostridioides;s__Clostridioides difficile	25	0	4.29e-05
100919050	SRR11829261|k141_152797_flag=1_multi=151.2792_len=2526	Kitrinoviricota	d__Bacteria;p__Firmicutes_A;c__Clostridia;o__Peptostreptococcales;f__Peptostreptococcaceae;g__Clostridioides;s__Clostridioides difficile	25	0	4.29e-05
100920986	SRR11828459|k141_18049_flag=1_multi=4.0000_len=1029	Duplornaviricota	d__Bacteria;p__Firmicutes_A;c__Clostridia;o__Peptostreptococcales;f__Peptostreptococcaceae;g__Clostridioides;s__Clostridioides difficile	29	1	1.11e-05
100923906	SRR11828459|k141_18049_flag=1_multi=4.0000_len=1029	Duplornaviricota	d__Bacteria;p__Firmicutes_A;c__Clostridia;o__Peptostreptococcales;f__Peptostreptococcaceae;g__Clostridioides;s__Clostridioides difficile	29	1	1.11e-05
100924445	SRR11829261|k141_152797_flag=1_multi=151.2792_len=2526	Kitrinoviricota	d__Bacteria;p__Firmicutes_A;c__Clostridia;o__Peptostreptococcales;f__Peptostreptococcaceae;g__Clostridioides;s__Clostridioides difficile	25	0	4.29e-05
100925250	SRR11648413|k141_155839_flag=0_multi=32.5524_len=1714	Lenarviricota	d__Bacteria;p__Proteobacteria;c__Gammaproteobacteria;o__Enterobacterales;f__Enterobacteriaceae;g__Salmonella;s__Salmonella enterica	23	0	0.000333
100936128	SRR7534944|k141_148179_flag=1_multi=20.0000_len=4383	Kitrinoviricota	d__Bacteria;p__Firmicutes_A;c__Clostridia;o__Lachnospirales;f__Lachnospiraceae;g__Enterocloster;s__Enterocloster clostridioformis	33	1	1.11e-05
100936488	SRR18770931|k141_12051_flag=1_multi=10.0000_len=2020	Lenarviricota	d__Bacteria;p__Campylobacterota;c__Campylobacteria;o__Campylobacterales;f__Sulfurospirillaceae;g__Sulfurospirillum;s__Sulfurospirillum deleyianum	30	1	0.000444
100937137	SRR11827439|k141_109350_flag=1_multi=4.0000_len=2497	Duplornaviricota	d__Bacteria;p__Firmicutes_A;c__Clostridia;o__Peptostreptococcales;f__Peptostreptococcaceae;g__Clostridioides;s__Clostridioides difficile	26	1	0.000481
100948623	SRR11827439|k141_109350_flag=1_multi=4.0000_len=2497	Duplornaviricota	d__Bacteria;p__Firmicutes_A;c__Clostridia;o__Peptostreptococcales;f__Peptostreptococcaceae;g__Clostridioides;s__Clostridioides difficile	26	1	0.000481
100951558	SRR11450579|k141_72748_flag=1_multi=7.0000_len=1299	Pisuviricota	d__Bacteria;p__Firmicutes_A;c__Clostridia;o__Tissierellales;f__Sporanaerobacteraceae;g__Anaerosalibacter_A;s__Anaerosalibacter_A sp900155565	23	0	0.000444
100951655	SRR11450579|k141_72748_flag=1_multi=7.0000_len=1299	Pisuviricota	d__Bacteria;p__Firmicutes_A;c__Clostridia;o__Tissierellales;f__Sporanaerobacteraceae;g__Anaerosalibacter_A;s__Anaerosalibacter_A sp900155565	23	0	0.000444
100953990	SRR11648413|k141_155839_flag=0_multi=32.5524_len=1714	Lenarviricota	d__Bacteria;p__Proteobacteria;c__Gammaproteobacteria;o__Enterobacterales;f__Enterobacteriaceae;g__Salmonella;s__Salmonella enterica	23	0	0.000333
100955745	BC-0345273217|k141_606	Lenarviricota	d__Bacteria;p__Chloroflexota;c__Dehalococcoidia;o__Tepidiformales;f__Tepidiformaceae;g__FeB-14;s__FeB-14 sp016719395	27	1	0.000308
100955746	SRR17497126|k141_68629_flag=1_multi=6.0000_len=1048	Pisuviricota	d__Bacteria;p__Chloroflexota;c__Dehalococcoidia;o__Tepidiformales;f__Tepidiformaceae;g__FeB-14;s__FeB-14 sp016719395	24	0	0.000391
100955746	SRR18770931|k141_53716_flag=1_multi=6.0000_len=1000	Lenarviricota	d__Bacteria;p__Chloroflexota;c__Dehalococcoidia;o__Tepidiformales;f__Tepidiformaceae;g__FeB-14;s__FeB-14 sp016719395	35	1	2.34e-06
100955746	SRR17509940|k141_117101_flag=1_multi=38.0000_len=2457	Duplornaviricota	d__Bacteria;p__Chloroflexota;c__Dehalococcoidia;o__Tepidiformales;f__Tepidiformaceae;g__FeB-14;s__FeB-14 sp016719395	27	0	8.4e-06
100955746	BC-0332570062|k141_61782	Lenarviricota	d__Bacteria;p__Chloroflexota;c__Dehalococcoidia;o__Tepidiformales;f__Tepidiformaceae;g__FeB-14;s__FeB-14 sp016719395	34	0	1.81e-07
100955746	SRR17509967|k141_44924_flag=1_multi=7.0000_len=2320	Pisuviricota	d__Bacteria;p__Chloroflexota;c__Dehalococcoidia;o__Tepidiformales;f__Tepidiformaceae;g__FeB-14;s__FeB-14 sp016719395	30	1	8.4e-06
100955746	SRR17481244|k141_92016_flag=1_multi=44.0000_len=3519	Lenarviricota	d__Bacteria;p__Chloroflexota;c__Dehalococcoidia;o__Tepidiformales;f__Tepidiformaceae;g__FeB-14;s__FeB-14 sp016719395	34	1	5.02e-08
100955746	SRR17509979|k141_28799_flag=1_multi=182.0000_len=1917	Pisuviricota	d__Bacteria;p__Chloroflexota;c__Dehalococcoidia;o__Tepidiformales;f__Tepidiformaceae;g__FeB-14;s__FeB-14 sp016719395	51	1	1.39e-13
100955746	SRR14530880|k119_2620_flag=1_multi=62.0000_len=4380	Kitrinoviricota	d__Bacteria;p__Chloroflexota;c__Dehalococcoidia;o__Tepidiformales;f__Tepidiformaceae;g__FeB-14;s__FeB-14 sp016719395	38	0	5.02e-08
100955746	SRR11648360|k141_236875_flag=1_multi=13.0000_len=4864	urv.p.001	d__Bacteria;p__Chloroflexota;c__Dehalococcoidia;o__Tepidiformales;f__Tepidiformaceae;g__FeB-14;s__FeB-14 sp016719395	29	0	6.49e-07
100955746	SRR18771403|k141_131354_flag=1_multi=48.8407_len=10690	Pisuviricota	d__Bacteria;p__Chloroflexota;c__Dehalococcoidia;o__Tepidiformales;f__Tepidiformaceae;g__FeB-14;s__FeB-14 sp016719395	62	2	4.95e-18
100955746	SRR11450579|k141_22903_flag=1_multi=93.0000_len=8250	Pisuviricota	d__Bacteria;p__Chloroflexota;c__Dehalococcoidia;o__Tepidiformales;f__Tepidiformaceae;g__FeB-14;s__FeB-14 sp016719395	27	0	8.4e-06
100955746	SRR17497098|k141_13697_flag=1_multi=34.0000_len=1851	Pisuviricota	d__Bacteria;p__Chloroflexota;c__Dehalococcoidia;o__Tepidiformales;f__Tepidiformaceae;g__FeB-14;s__FeB-14 sp016719395	67	4	2.32e-11
100955746	SRR17497064|k141_128537_flag=1_multi=9.0000_len=1004	Pisuviricota	d__Bacteria;p__Chloroflexota;c__Dehalococcoidia;o__Tepidiformales;f__Tepidiformaceae;g__FeB-14;s__FeB-14 sp016719395	32	1	0.000109
100955746	SRR17509976|k141_164083_flag=1_multi=58.0000_len=4337	Pisuviricota	d__Bacteria;p__Chloroflexota;c__Dehalococcoidia;o__Tepidiformales;f__Tepidiformaceae;g__FeB-14;s__FeB-14 sp016719395	34	2	2.34e-06
100955746	SRR17509979|k141_62709_flag=1_multi=44.0000_len=2751	Pisuviricota	d__Bacteria;p__Chloroflexota;c__Dehalococcoidia;o__Tepidiformales;f__Tepidiformaceae;g__FeB-14;s__FeB-14 sp016719395	41	1	1.08e-09
100955746	SRR10849744|k141_310535_flag=1_multi=101.0000_len=3955	Lenarviricota	d__Bacteria;p__Chloroflexota;c__Dehalococcoidia;o__Tepidiformales;f__Tepidiformaceae;g__FeB-14;s__FeB-14 sp016719395	38	1	3e-10
100955746	SRR17497068|k141_144847_flag=1_multi=37.7881_len=1816	Pisuviricota	d__Bacteria;p__Chloroflexota;c__Dehalococcoidia;o__Tepidiformales;f__Tepidiformaceae;g__FeB-14;s__FeB-14 sp016719395	62	4	1.38e-18
100955746	SRR10849374|k141_218357_flag=1_multi=12.0000_len=3750	Lenarviricota	d__Bacteria;p__Chloroflexota;c__Dehalococcoidia;o__Tepidiformales;f__Tepidiformaceae;g__FeB-14;s__FeB-14 sp016719395	34	1	5.02e-08
100955746	SRR11648176|k141_298601_flag=1_multi=36.0000_len=3120	Kitrinoviricota	d__Bacteria;p__Chloroflexota;c__Dehalococcoidia;o__Tepidiformales;f__Tepidiformaceae;g__FeB-14;s__FeB-14 sp016719395	57	3	1.78e-17
100955746	SRR17497054|k141_191824_flag=1_multi=13.0000_len=2259	Pisuviricota	d__Bacteria;p__Chloroflexota;c__Dehalococcoidia;o__Tepidiformales;f__Tepidiformaceae;g__FeB-14;s__FeB-14 sp016719395	51	5	8.34e-11
100955746	SRR17509978|k141_113185_flag=1_multi=9.0000_len=1199	Pisuviricota	d__Bacteria;p__Chloroflexota;c__Dehalococcoidia;o__Tepidiformales;f__Tepidiformaceae;g__FeB-14;s__FeB-14 sp016719395	33	2	8.4e-06
100955746	SRR17497064|k141_135790_flag=1_multi=52.0000_len=1739	Pisuviricota	d__Bacteria;p__Chloroflexota;c__Dehalococcoidia;o__Tepidiformales;f__Tepidiformaceae;g__FeB-14;s__FeB-14 sp016719395	55	0	2.98e-15
100955746	SRR17509979|k141_54497_flag=1_multi=434.0000_len=1853	Pisuviricota	d__Bacteria;p__Chloroflexota;c__Dehalococcoidia;o__Tepidiformales;f__Tepidiformaceae;g__FeB-14;s__FeB-14 sp016719395	62	3	4.95e-18
100955746	SRR17509978|k141_111246_flag=1_multi=25.3407_len=1855	Pisuviricota	d__Bacteria;p__Chloroflexota;c__Dehalococcoidia;o__Tepidiformales;f__Tepidiformaceae;g__FeB-14;s__FeB-14 sp016719395	41	2	3e-10
100955746	SRR17497126|k141_95757_flag=1_multi=826.0000_len=3116	Lenarviricota	d__Bacteria;p__Chloroflexota;c__Dehalococcoidia;o__Tepidiformales;f__Tepidiformaceae;g__FeB-14;s__FeB-14 sp016719395	42	3	6.49e-07
100955746	SRR5829964|k141_20917_flag=1_multi=123.0000_len=1791	Kitrinoviricota	d__Bacteria;p__Chloroflexota;c__Dehalococcoidia;o__Tepidiformales;f__Tepidiformaceae;g__FeB-14;s__FeB-14 sp016719395	31	1	0.000391
100955746	SRR17509977|k141_51278_flag=1_multi=666.0000_len=6190	Pisuviricota	d__Bacteria;p__Chloroflexota;c__Dehalococcoidia;o__Tepidiformales;f__Tepidiformaceae;g__FeB-14;s__FeB-14 sp016719395	34	1	5.02e-08
100955746	SRR17509977|k141_156580_flag=1_multi=3.0000_len=1406	Pisuviricota	d__Bacteria;p__Chloroflexota;c__Dehalococcoidia;o__Tepidiformales;f__Tepidiformaceae;g__FeB-14;s__FeB-14 sp016719395	37	1	1.81e-07
100955746	SRR17509979|k141_17026_flag=1_multi=263.6760_len=2576	Lenarviricota	d__Bacteria;p__Chloroflexota;c__Dehalococcoidia;o__Tepidiformales;f__Tepidiformaceae;g__FeB-14;s__FeB-14 sp016719395	32	1	0.000109
100955746	SRR17509979|k141_11840_flag=1_multi=73.0000_len=1384	Pisuviricota	d__Bacteria;p__Chloroflexota;c__Dehalococcoidia;o__Tepidiformales;f__Tepidiformaceae;g__FeB-14;s__FeB-14 sp016719395	32	1	0.000109
100955746	SRR17509979|k141_53443_flag=1_multi=169.8080_len=4630	Kitrinoviricota	d__Bacteria;p__Chloroflexota;c__Dehalococcoidia;o__Tepidiformales;f__Tepidiformaceae;g__FeB-14;s__FeB-14 sp016719395	62	4	1.38e-18
100955746	SRR17509979|k141_52575_flag=1_multi=83.6741_len=1804	Pisuviricota	d__Bacteria;p__Chloroflexota;c__Dehalococcoidia;o__Tepidiformales;f__Tepidiformaceae;g__FeB-14;s__FeB-14 sp016719395	55	0	2.98e-15
100955746	SRR17497069|k141_154292_flag=1_multi=166.0000_len=1714	Pisuviricota	d__Bacteria;p__Chloroflexota;c__Dehalococcoidia;o__Tepidiformales;f__Tepidiformaceae;g__FeB-14;s__FeB-14 sp016719395	44	4	2.34e-06
100955746	BC-0345298860|k141_3179	Lenarviricota	d__Bacteria;p__Chloroflexota;c__Dehalococcoidia;o__Tepidiformales;f__Tepidiformaceae;g__FeB-14;s__FeB-14 sp016719395	62	4	1.38e-18
100955746	SRR11829331|k141_332492_flag=1_multi=252.0000_len=4351	Lenarviricota	d__Bacteria;p__Chloroflexota;c__Dehalococcoidia;o__Tepidiformales;f__Tepidiformaceae;g__FeB-14;s__FeB-14 sp016719395	62	4	1.38e-18
100955746	SRR11828805|k141_11533_flag=1_multi=89.8329_len=3648	Kitrinoviricota	d__Bacteria;p__Chloroflexota;c__Dehalococcoidia;o__Tepidiformales;f__Tepidiformaceae;g__FeB-14;s__FeB-14 sp016719395	46	2	3.88e-09
100955746	SRR17509979|k141_40329_flag=1_multi=17.0000_len=1013	Pisuviricota	d__Bacteria;p__Chloroflexota;c__Dehalococcoidia;o__Tepidiformales;f__Tepidiformaceae;g__FeB-14;s__FeB-14 sp016719395	28	0	2.34e-06
100955746	SRR17481242|k141_14860_flag=1_multi=140.0000_len=3974	Unclassified	d__Bacteria;p__Chloroflexota;c__Dehalococcoidia;o__Tepidiformales;f__Tepidiformaceae;g__FeB-14;s__FeB-14 sp016719395	62	4	1.38e-18
100955746	SRR17497092|k141_33398_flag=1_multi=217.0121_len=1878	Pisuviricota	d__Bacteria;p__Chloroflexota;c__Dehalococcoidia;o__Tepidiformales;f__Tepidiformaceae;g__FeB-14;s__FeB-14 sp016719395	62	0	1.78e-17
100955746	SRR11565437|k141_190787_flag=1_multi=8.0000_len=2964	Kitrinoviricota	d__Bacteria;p__Chloroflexota;c__Dehalococcoidia;o__Tepidiformales;f__Tepidiformaceae;g__FeB-14;s__FeB-14 sp016719395	28	0	2.34e-06
100955749	SRR11828805|k141_11533_flag=1_multi=89.8329_len=3648	Kitrinoviricota	d__Bacteria;p__Chloroflexota;c__Dehalococcoidia;o__Tepidiformales;f__Tepidiformaceae;g__FeB-14;s__FeB-14 sp016719395	33	1	8.75e-06
100955749	SRR11450580|k141_155544_flag=1_multi=47.0000_len=9456	Pisuviricota	d__Bacteria;p__Chloroflexota;c__Dehalococcoidia;o__Tepidiformales;f__Tepidiformaceae;g__FeB-14;s__FeB-14 sp016719395	26	1	0.000407
100955749	SRR17509979|k141_40329_flag=1_multi=17.0000_len=1013	Pisuviricota	d__Bacteria;p__Chloroflexota;c__Dehalococcoidia;o__Tepidiformales;f__Tepidiformaceae;g__FeB-14;s__FeB-14 sp016719395	27	1	0.000113
100955749	SRR14530880|k119_2620_flag=1_multi=62.0000_len=4380	Kitrinoviricota	d__Bacteria;p__Chloroflexota;c__Dehalococcoidia;o__Tepidiformales;f__Tepidiformaceae;g__FeB-14;s__FeB-14 sp016719395	35	1	3.15e-05
100956834	SRR7539006|k141_895006_flag=1_multi=5.0000_len=1941	Lenarviricota	d__Bacteria;p__Firmicutes;c__Bacilli;o__Lactobacillales;f__Listeriaceae;g__Listeria;s__Listeria monocytogenes	28	0	8.23e-05
100958459	SRR11829332|k141_140113_flag=1_multi=16.0000_len=5540	Kitrinoviricota	d__Bacteria;p__Firmicutes_A;c__Clostridia;o__Clostridiales;f__Clostridiaceae;g__Clostridium_B;s__Clostridium_B sp902809985	27	0	0.000481
100960566	SRR11829261|k141_152797_flag=1_multi=151.2792_len=2526	Kitrinoviricota	d__Bacteria;p__Firmicutes_A;c__Clostridia;o__Peptostreptococcales;f__Peptostreptococcaceae;g__Clostridioides;s__Clostridioides difficile	25	0	4.29e-05
100962414	SRR12685793|k141_197539_flag=1_multi=19.0000_len=7364	Pisuviricota	d__Bacteria;p__Firmicutes_B;c__Thermincolia;o__Thermincolales;f__Thermincolaceae;g__Thermincola;s__Thermincola ferriacetica	23	0	0.000481
100982749	SRR11828459|k141_18049_flag=1_multi=4.0000_len=1029	Duplornaviricota	d__Bacteria;p__Firmicutes_A;c__Clostridia;o__Peptostreptococcales;f__Peptostreptococcaceae;g__Clostridioides;s__Clostridioides difficile	29	1	1.11e-05
100984746	SRR11829260|k141_73666_flag=0_multi=76.0000_len=11694	Pisuviricota	d__Bacteria;p__Firmicutes_A;c__Clostridia;o__Peptostreptococcales;f__Peptostreptococcaceae;g__Clostridioides;s__Clostridioides difficile	25	1	0.001
100985273	SRR11827439|k141_109350_flag=1_multi=4.0000_len=2497	Duplornaviricota	d__Bacteria;p__Firmicutes_A;c__Clostridia;o__Peptostreptococcales;f__Peptostreptococcaceae;g__Clostridioides;s__Clostridioides difficile	26	1	0.000481
100999377	SRR11828459|k141_18049_flag=1_multi=4.0000_len=1029	Duplornaviricota	d__Bacteria;p__Firmicutes_A;c__Clostridia;o__Peptostreptococcales;f__Peptostreptococcaceae;g__Clostridioides;s__Clostridioides difficile	29	1	1.11e-05
101012975	SRR11828459|k141_18049_flag=1_multi=4.0000_len=1029	Duplornaviricota	d__Bacteria;p__Firmicutes_A;c__Clostridia;o__Peptostreptococcales;f__Peptostreptococcaceae;g__Clostridioides;s__Clostridioides difficile	29	1	1.11e-05
101018134	SRR11829261|k141_152797_flag=1_multi=151.2792_len=2526	Kitrinoviricota	d__Bacteria;p__Firmicutes_A;c__Clostridia;o__Peptostreptococcales;f__Peptostreptococcaceae;g__Clostridioides;s__Clostridioides difficile	25	0	4.29e-05
101034975	SRR17497092|k141_33398_flag=1_multi=217.0121_len=1878	Pisuviricota	d__Bacteria;p__Proteobacteria;c__Gammaproteobacteria;o__Pseudomonadales;f__Pseudomonadaceae;g__Pseudomonas;s__Pseudomonas aeruginosa	23	0	0.000333
101034975	SRR17497049|k141_87067_flag=1_multi=464.0000_len=3624	Lenarviricota	d__Bacteria;p__Proteobacteria;c__Gammaproteobacteria;o__Pseudomonadales;f__Pseudomonadaceae;g__Pseudomonas;s__Pseudomonas aeruginosa	23	0	0.000333
101034975	SRR17509979|k141_52575_flag=1_multi=83.6741_len=1804	Pisuviricota	d__Bacteria;p__Proteobacteria;c__Gammaproteobacteria;o__Pseudomonadales;f__Pseudomonadaceae;g__Pseudomonas;s__Pseudomonas aeruginosa	23	0	0.000333
101034975	SRR17497064|k141_135790_flag=1_multi=52.0000_len=1739	Pisuviricota	d__Bacteria;p__Proteobacteria;c__Gammaproteobacteria;o__Pseudomonadales;f__Pseudomonadaceae;g__Pseudomonas;s__Pseudomonas aeruginosa	23	0	0.000333
101034975	BC-0332570062|k141_61782	Lenarviricota	d__Bacteria;p__Proteobacteria;c__Gammaproteobacteria;o__Pseudomonadales;f__Pseudomonadaceae;g__Pseudomonas;s__Pseudomonas aeruginosa	23	0	0.000333
101034975	SRR11829331|k141_332492_flag=1_multi=252.0000_len=4351	Lenarviricota	d__Bacteria;p__Proteobacteria;c__Gammaproteobacteria;o__Pseudomonadales;f__Pseudomonadaceae;g__Pseudomonas;s__Pseudomonas aeruginosa	23	0	0.000333
101034975	SRR11648176|k141_298601_flag=1_multi=36.0000_len=3120	Kitrinoviricota	d__Bacteria;p__Proteobacteria;c__Gammaproteobacteria;o__Pseudomonadales;f__Pseudomonadaceae;g__Pseudomonas;s__Pseudomonas aeruginosa	23	0	0.000333
101034975	SRR17497068|k141_144847_flag=1_multi=37.7881_len=1816	Pisuviricota	d__Bacteria;p__Proteobacteria;c__Gammaproteobacteria;o__Pseudomonadales;f__Pseudomonadaceae;g__Pseudomonas;s__Pseudomonas aeruginosa	23	0	0.000333
101034975	SRR17509979|k141_28799_flag=1_multi=182.0000_len=1917	Pisuviricota	d__Bacteria;p__Proteobacteria;c__Gammaproteobacteria;o__Pseudomonadales;f__Pseudomonadaceae;g__Pseudomonas;s__Pseudomonas aeruginosa	23	0	0.000333
101034975	SRR17481242|k141_14860_flag=1_multi=140.0000_len=3974	Unclassified	d__Bacteria;p__Proteobacteria;c__Gammaproteobacteria;o__Pseudomonadales;f__Pseudomonadaceae;g__Pseudomonas;s__Pseudomonas aeruginosa	23	0	0.000333
101034975	BC-0345298860|k141_3179	Lenarviricota	d__Bacteria;p__Proteobacteria;c__Gammaproteobacteria;o__Pseudomonadales;f__Pseudomonadaceae;g__Pseudomonas;s__Pseudomonas aeruginosa	23	0	0.000333
101034975	SRR17509978|k141_111246_flag=1_multi=25.3407_len=1855	Pisuviricota	d__Bacteria;p__Proteobacteria;c__Gammaproteobacteria;o__Pseudomonadales;f__Pseudomonadaceae;g__Pseudomonas;s__Pseudomonas aeruginosa	23	0	0.000333
101034975	SRR17509979|k141_62709_flag=1_multi=44.0000_len=2751	Pisuviricota	d__Bacteria;p__Proteobacteria;c__Gammaproteobacteria;o__Pseudomonadales;f__Pseudomonadaceae;g__Pseudomonas;s__Pseudomonas aeruginosa	23	0	0.000333
101034975	SRR17497098|k141_13697_flag=1_multi=34.0000_len=1851	Pisuviricota	d__Bacteria;p__Proteobacteria;c__Gammaproteobacteria;o__Pseudomonadales;f__Pseudomonadaceae;g__Pseudomonas;s__Pseudomonas aeruginosa	23	0	0.000333
101034975	SRR17509979|k141_53443_flag=1_multi=169.8080_len=4630	Kitrinoviricota	d__Bacteria;p__Proteobacteria;c__Gammaproteobacteria;o__Pseudomonadales;f__Pseudomonadaceae;g__Pseudomonas;s__Pseudomonas aeruginosa	23	0	0.000333
101034975	SRR17481244|k141_92016_flag=1_multi=44.0000_len=3519	Lenarviricota	d__Bacteria;p__Proteobacteria;c__Gammaproteobacteria;o__Pseudomonadales;f__Pseudomonadaceae;g__Pseudomonas;s__Pseudomonas aeruginosa	23	0	0.000333
101034975	SRR18771403|k141_131354_flag=1_multi=48.8407_len=10690	Pisuviricota	d__Bacteria;p__Proteobacteria;c__Gammaproteobacteria;o__Pseudomonadales;f__Pseudomonadaceae;g__Pseudomonas;s__Pseudomonas aeruginosa	23	0	0.000333
101034975	SRR11565437|k141_190787_flag=1_multi=8.0000_len=2964	Kitrinoviricota	d__Bacteria;p__Proteobacteria;c__Gammaproteobacteria;o__Pseudomonadales;f__Pseudomonadaceae;g__Pseudomonas;s__Pseudomonas aeruginosa	25	0	2.57e-05
101034975	SRR17509967|k141_44924_flag=1_multi=7.0000_len=2320	Pisuviricota	d__Bacteria;p__Proteobacteria;c__Gammaproteobacteria;o__Pseudomonadales;f__Pseudomonadaceae;g__Pseudomonas;s__Pseudomonas aeruginosa	23	0	0.000333
101034975	SRR17497126|k141_68629_flag=1_multi=6.0000_len=1048	Pisuviricota	d__Bacteria;p__Proteobacteria;c__Gammaproteobacteria;o__Pseudomonadales;f__Pseudomonadaceae;g__Pseudomonas;s__Pseudomonas aeruginosa	23	0	0.000333
101034975	SRR17509979|k141_54497_flag=1_multi=434.0000_len=1853	Pisuviricota	d__Bacteria;p__Proteobacteria;c__Gammaproteobacteria;o__Pseudomonadales;f__Pseudomonadaceae;g__Pseudomonas;s__Pseudomonas aeruginosa	23	0	0.000333
101034975	SRR17497099|k141_59590_flag=1_multi=17.5683_len=1158	Pisuviricota	d__Bacteria;p__Proteobacteria;c__Gammaproteobacteria;o__Pseudomonadales;f__Pseudomonadaceae;g__Pseudomonas;s__Pseudomonas aeruginosa	28	0	5.53e-07
101034975	SRR17497054|k141_191824_flag=1_multi=13.0000_len=2259	Pisuviricota	d__Bacteria;p__Proteobacteria;c__Gammaproteobacteria;o__Pseudomonadales;f__Pseudomonadaceae;g__Pseudomonas;s__Pseudomonas aeruginosa	23	0	0.000333
101034975	SRR17509976|k141_164083_flag=1_multi=58.0000_len=4337	Pisuviricota	d__Bacteria;p__Proteobacteria;c__Gammaproteobacteria;o__Pseudomonadales;f__Pseudomonadaceae;g__Pseudomonas;s__Pseudomonas aeruginosa	23	0	0.000333
101034975	SRR17509977|k141_51278_flag=1_multi=666.0000_len=6190	Pisuviricota	d__Bacteria;p__Proteobacteria;c__Gammaproteobacteria;o__Pseudomonadales;f__Pseudomonadaceae;g__Pseudomonas;s__Pseudomonas aeruginosa	23	0	0.000333
101034975	SRR14530880|k119_2620_flag=1_multi=62.0000_len=4380	Kitrinoviricota	d__Bacteria;p__Proteobacteria;c__Gammaproteobacteria;o__Pseudomonadales;f__Pseudomonadaceae;g__Pseudomonas;s__Pseudomonas aeruginosa	23	0	0.000333
101034975	SRR10849374|k141_218357_flag=1_multi=12.0000_len=3750	Lenarviricota	d__Bacteria;p__Proteobacteria;c__Gammaproteobacteria;o__Pseudomonadales;f__Pseudomonadaceae;g__Pseudomonas;s__Pseudomonas aeruginosa	23	0	0.000333
101034975	SRR11648360|k141_236875_flag=1_multi=13.0000_len=4864	urv.p.001	d__Bacteria;p__Proteobacteria;c__Gammaproteobacteria;o__Pseudomonadales;f__Pseudomonadaceae;g__Pseudomonas;s__Pseudomonas aeruginosa	23	0	0.000333
101034975	SRR17497126|k141_132965_flag=1_multi=75.0000_len=1737	Pisuviricota	d__Bacteria;p__Proteobacteria;c__Gammaproteobacteria;o__Pseudomonadales;f__Pseudomonadaceae;g__Pseudomonas;s__Pseudomonas aeruginosa	23	0	0.000333
101034975	SRR17509940|k141_117101_flag=1_multi=38.0000_len=2457	Duplornaviricota	d__Bacteria;p__Proteobacteria;c__Gammaproteobacteria;o__Pseudomonadales;f__Pseudomonadaceae;g__Pseudomonas;s__Pseudomonas aeruginosa	23	0	0.000333
101034975	SRR17509978|k141_113185_flag=1_multi=9.0000_len=1199	Pisuviricota	d__Bacteria;p__Proteobacteria;c__Gammaproteobacteria;o__Pseudomonadales;f__Pseudomonadaceae;g__Pseudomonas;s__Pseudomonas aeruginosa	23	0	0.000333
101034975	SRR17509977|k141_137261_flag=1_multi=15.0000_len=2450	Kitrinoviricota	d__Bacteria;p__Proteobacteria;c__Gammaproteobacteria;o__Pseudomonadales;f__Pseudomonadaceae;g__Pseudomonas;s__Pseudomonas aeruginosa	23	0	0.000333
101034975	SRR11450579|k141_22903_flag=1_multi=93.0000_len=8250	Pisuviricota	d__Bacteria;p__Proteobacteria;c__Gammaproteobacteria;o__Pseudomonadales;f__Pseudomonadaceae;g__Pseudomonas;s__Pseudomonas aeruginosa	23	0	0.000333
101034975	SRR11828805|k141_11533_flag=1_multi=89.8329_len=3648	Kitrinoviricota	d__Bacteria;p__Proteobacteria;c__Gammaproteobacteria;o__Pseudomonadales;f__Pseudomonadaceae;g__Pseudomonas;s__Pseudomonas aeruginosa	23	0	0.000333
101034975	SRR18770931|k141_53716_flag=1_multi=6.0000_len=1000	Lenarviricota	d__Bacteria;p__Proteobacteria;c__Gammaproteobacteria;o__Pseudomonadales;f__Pseudomonadaceae;g__Pseudomonas;s__Pseudomonas aeruginosa	23	0	0.000333
101034975	SRR17509940|k141_147462_flag=1_multi=29.0000_len=3674	Unclassified	d__Bacteria;p__Proteobacteria;c__Gammaproteobacteria;o__Pseudomonadales;f__Pseudomonadaceae;g__Pseudomonas;s__Pseudomonas aeruginosa	25	0	2.57e-05
101034975	SRR10849744|k141_310535_flag=1_multi=101.0000_len=3955	Lenarviricota	d__Bacteria;p__Proteobacteria;c__Gammaproteobacteria;o__Pseudomonadales;f__Pseudomonadaceae;g__Pseudomonas;s__Pseudomonas aeruginosa	32	2	7.16e-06
101034977	SRR17481242|k141_14860_flag=1_multi=140.0000_len=3974	Unclassified	d__Bacteria;p__Proteobacteria;c__Gammaproteobacteria;o__Pseudomonadales;f__Pseudomonadaceae;g__Pseudomonas;s__Pseudomonas aeruginosa	25	1	0.000533
101034977	SRR17509979|k141_53443_flag=1_multi=169.8080_len=4630	Kitrinoviricota	d__Bacteria;p__Proteobacteria;c__Gammaproteobacteria;o__Pseudomonadales;f__Pseudomonadaceae;g__Pseudomonas;s__Pseudomonas aeruginosa	25	1	0.000533
101034977	SRR17509979|k141_28799_flag=1_multi=182.0000_len=1917	Pisuviricota	d__Bacteria;p__Proteobacteria;c__Gammaproteobacteria;o__Pseudomonadales;f__Pseudomonadaceae;g__Pseudomonas;s__Pseudomonas aeruginosa	22	0	0.000533
101034977	SRR17497126|k141_132965_flag=1_multi=75.0000_len=1737	Pisuviricota	d__Bacteria;p__Proteobacteria;c__Gammaproteobacteria;o__Pseudomonadales;f__Pseudomonadaceae;g__Pseudomonas;s__Pseudomonas aeruginosa	22	0	0.000533
101034977	SRR11829331|k141_332492_flag=1_multi=252.0000_len=4351	Lenarviricota	d__Bacteria;p__Proteobacteria;c__Gammaproteobacteria;o__Pseudomonadales;f__Pseudomonadaceae;g__Pseudomonas;s__Pseudomonas aeruginosa	25	1	0.000533
101034977	SRR17509979|k141_52575_flag=1_multi=83.6741_len=1804	Pisuviricota	d__Bacteria;p__Proteobacteria;c__Gammaproteobacteria;o__Pseudomonadales;f__Pseudomonadaceae;g__Pseudomonas;s__Pseudomonas aeruginosa	25	1	0.000533
101034977	SRR17509979|k141_54497_flag=1_multi=434.0000_len=1853	Pisuviricota	d__Bacteria;p__Proteobacteria;c__Gammaproteobacteria;o__Pseudomonadales;f__Pseudomonadaceae;g__Pseudomonas;s__Pseudomonas aeruginosa	25	1	0.000533
101034977	SRR17497092|k141_33398_flag=1_multi=217.0121_len=1878	Pisuviricota	d__Bacteria;p__Proteobacteria;c__Gammaproteobacteria;o__Pseudomonadales;f__Pseudomonadaceae;g__Pseudomonas;s__Pseudomonas aeruginosa	25	1	0.000533
101034977	SRR17509978|k141_111246_flag=1_multi=25.3407_len=1855	Pisuviricota	d__Bacteria;p__Proteobacteria;c__Gammaproteobacteria;o__Pseudomonadales;f__Pseudomonadaceae;g__Pseudomonas;s__Pseudomonas aeruginosa	25	1	0.000533
101034977	SRR17497054|k141_191824_flag=1_multi=13.0000_len=2259	Pisuviricota	d__Bacteria;p__Proteobacteria;c__Gammaproteobacteria;o__Pseudomonadales;f__Pseudomonadaceae;g__Pseudomonas;s__Pseudomonas aeruginosa	22	0	0.000533
101034977	SRR17497064|k141_135790_flag=1_multi=52.0000_len=1739	Pisuviricota	d__Bacteria;p__Proteobacteria;c__Gammaproteobacteria;o__Pseudomonadales;f__Pseudomonadaceae;g__Pseudomonas;s__Pseudomonas aeruginosa	25	1	0.000533
101034977	SRR17509977|k141_51278_flag=1_multi=666.0000_len=6190	Pisuviricota	d__Bacteria;p__Proteobacteria;c__Gammaproteobacteria;o__Pseudomonadales;f__Pseudomonadaceae;g__Pseudomonas;s__Pseudomonas aeruginosa	22	0	0.000533
101034977	SRR17497098|k141_13697_flag=1_multi=34.0000_len=1851	Pisuviricota	d__Bacteria;p__Proteobacteria;c__Gammaproteobacteria;o__Pseudomonadales;f__Pseudomonadaceae;g__Pseudomonas;s__Pseudomonas aeruginosa	25	1	0.000533
101034977	BC-0345298860|k141_3179	Lenarviricota	d__Bacteria;p__Proteobacteria;c__Gammaproteobacteria;o__Pseudomonadales;f__Pseudomonadaceae;g__Pseudomonas;s__Pseudomonas aeruginosa	22	0	0.000533
101034977	SRR18770931|k141_53716_flag=1_multi=6.0000_len=1000	Lenarviricota	d__Bacteria;p__Proteobacteria;c__Gammaproteobacteria;o__Pseudomonadales;f__Pseudomonadaceae;g__Pseudomonas;s__Pseudomonas aeruginosa	22	0	0.000533
101034977	SRR11648360|k141_236875_flag=1_multi=13.0000_len=4864	urv.p.001	d__Bacteria;p__Proteobacteria;c__Gammaproteobacteria;o__Pseudomonadales;f__Pseudomonadaceae;g__Pseudomonas;s__Pseudomonas aeruginosa	25	1	0.000533
101034977	SRR11829261|k141_72242_flag=1_multi=16.0000_len=4793	Unclassified	d__Bacteria;p__Proteobacteria;c__Gammaproteobacteria;o__Pseudomonadales;f__Pseudomonadaceae;g__Pseudomonas;s__Pseudomonas aeruginosa	22	0	0.000533
101034977	SRR17509967|k141_44924_flag=1_multi=7.0000_len=2320	Pisuviricota	d__Bacteria;p__Proteobacteria;c__Gammaproteobacteria;o__Pseudomonadales;f__Pseudomonadaceae;g__Pseudomonas;s__Pseudomonas aeruginosa	25	1	0.000533
101034977	SRR17497068|k141_144847_flag=1_multi=37.7881_len=1816	Pisuviricota	d__Bacteria;p__Proteobacteria;c__Gammaproteobacteria;o__Pseudomonadales;f__Pseudomonadaceae;g__Pseudomonas;s__Pseudomonas aeruginosa	22	0	0.000533
101034977	SRR17509979|k141_17026_flag=1_multi=263.6760_len=2576	Lenarviricota	d__Bacteria;p__Proteobacteria;c__Gammaproteobacteria;o__Pseudomonadales;f__Pseudomonadaceae;g__Pseudomonas;s__Pseudomonas aeruginosa	26	0	0.000533
101034977	BC-0332570062|k141_61782	Lenarviricota	d__Bacteria;p__Proteobacteria;c__Gammaproteobacteria;o__Pseudomonadales;f__Pseudomonadaceae;g__Pseudomonas;s__Pseudomonas aeruginosa	22	0	0.000533
101034977	SRR17497126|k141_68629_flag=1_multi=6.0000_len=1048	Pisuviricota	d__Bacteria;p__Proteobacteria;c__Gammaproteobacteria;o__Pseudomonadales;f__Pseudomonadaceae;g__Pseudomonas;s__Pseudomonas aeruginosa	22	0	0.000533
101034977	SRR10849744|k141_310535_flag=1_multi=101.0000_len=3955	Lenarviricota	d__Bacteria;p__Proteobacteria;c__Gammaproteobacteria;o__Pseudomonadales;f__Pseudomonadaceae;g__Pseudomonas;s__Pseudomonas aeruginosa	25	0	1.14e-05
101034977	SRR17497063|k141_236251_flag=1_multi=918.6198_len=5775	Lenarviricota	d__Bacteria;p__Proteobacteria;c__Gammaproteobacteria;o__Pseudomonadales;f__Pseudomonadaceae;g__Pseudomonas;s__Pseudomonas aeruginosa	25	1	0.000533
101034977	SRR17509976|k141_164083_flag=1_multi=58.0000_len=4337	Pisuviricota	d__Bacteria;p__Proteobacteria;c__Gammaproteobacteria;o__Pseudomonadales;f__Pseudomonadaceae;g__Pseudomonas;s__Pseudomonas aeruginosa	22	0	0.000533
101034977	SRR12685024|k141_131206_flag=1_multi=12.0000_len=3956	Pisuviricota	d__Bacteria;p__Proteobacteria;c__Gammaproteobacteria;o__Pseudomonadales;f__Pseudomonadaceae;g__Pseudomonas;s__Pseudomonas aeruginosa	25	1	0.000533
101034977	SRR11450579|k141_22903_flag=1_multi=93.0000_len=8250	Pisuviricota	d__Bacteria;p__Proteobacteria;c__Gammaproteobacteria;o__Pseudomonadales;f__Pseudomonadaceae;g__Pseudomonas;s__Pseudomonas aeruginosa	25	1	0.000533
101034977	SRR17509940|k141_117101_flag=1_multi=38.0000_len=2457	Duplornaviricota	d__Bacteria;p__Proteobacteria;c__Gammaproteobacteria;o__Pseudomonadales;f__Pseudomonadaceae;g__Pseudomonas;s__Pseudomonas aeruginosa	22	0	0.000533
101034977	SRR17509979|k141_16339_flag=1_multi=584.0000_len=1694	Pisuviricota	d__Bacteria;p__Proteobacteria;c__Gammaproteobacteria;o__Pseudomonadales;f__Pseudomonadaceae;g__Pseudomonas;s__Pseudomonas aeruginosa	22	0	0.000533
101034977	SRR10849374|k141_218357_flag=1_multi=12.0000_len=3750	Lenarviricota	d__Bacteria;p__Proteobacteria;c__Gammaproteobacteria;o__Pseudomonadales;f__Pseudomonadaceae;g__Pseudomonas;s__Pseudomonas aeruginosa	22	0	0.000533
101034977	SRR17481244|k141_92016_flag=1_multi=44.0000_len=3519	Lenarviricota	d__Bacteria;p__Proteobacteria;c__Gammaproteobacteria;o__Pseudomonadales;f__Pseudomonadaceae;g__Pseudomonas;s__Pseudomonas aeruginosa	22	0	0.000533
101034977	SRR17509979|k141_62709_flag=1_multi=44.0000_len=2751	Pisuviricota	d__Bacteria;p__Proteobacteria;c__Gammaproteobacteria;o__Pseudomonadales;f__Pseudomonadaceae;g__Pseudomonas;s__Pseudomonas aeruginosa	22	0	0.000533
101034977	SRR11648176|k141_298601_flag=1_multi=36.0000_len=3120	Kitrinoviricota	d__Bacteria;p__Proteobacteria;c__Gammaproteobacteria;o__Pseudomonadales;f__Pseudomonadaceae;g__Pseudomonas;s__Pseudomonas aeruginosa	22	0	0.000533
101034977	SRR17509979|k141_40329_flag=1_multi=17.0000_len=1013	Pisuviricota	d__Bacteria;p__Proteobacteria;c__Gammaproteobacteria;o__Pseudomonadales;f__Pseudomonadaceae;g__Pseudomonas;s__Pseudomonas aeruginosa	22	0	0.000533
101034977	SRR14530880|k119_2620_flag=1_multi=62.0000_len=4380	Kitrinoviricota	d__Bacteria;p__Proteobacteria;c__Gammaproteobacteria;o__Pseudomonadales;f__Pseudomonadaceae;g__Pseudomonas;s__Pseudomonas aeruginosa	22	0	0.000533
101034977	SRR17497049|k141_87067_flag=1_multi=464.0000_len=3624	Lenarviricota	d__Bacteria;p__Proteobacteria;c__Gammaproteobacteria;o__Pseudomonadales;f__Pseudomonadaceae;g__Pseudomonas;s__Pseudomonas aeruginosa	22	0	0.000533
101034977	SRR11565437|k141_190787_flag=1_multi=8.0000_len=2964	Kitrinoviricota	d__Bacteria;p__Proteobacteria;c__Gammaproteobacteria;o__Pseudomonadales;f__Pseudomonadaceae;g__Pseudomonas;s__Pseudomonas aeruginosa	25	0	1.14e-05
101034977	SRR17497099|k141_59590_flag=1_multi=17.5683_len=1158	Pisuviricota	d__Bacteria;p__Proteobacteria;c__Gammaproteobacteria;o__Pseudomonadales;f__Pseudomonadaceae;g__Pseudomonas;s__Pseudomonas aeruginosa	24	0	4.12e-05
101034977	SRR17481245|k141_34522_flag=1_multi=17.0000_len=1572	Pisuviricota	d__Bacteria;p__Proteobacteria;c__Gammaproteobacteria;o__Pseudomonadales;f__Pseudomonadaceae;g__Pseudomonas;s__Pseudomonas aeruginosa	22	0	0.000533
101034977	SRR17509977|k141_137261_flag=1_multi=15.0000_len=2450	Kitrinoviricota	d__Bacteria;p__Proteobacteria;c__Gammaproteobacteria;o__Pseudomonadales;f__Pseudomonadaceae;g__Pseudomonas;s__Pseudomonas aeruginosa	22	0	0.000533
101034977	SRR18771403|k141_131354_flag=1_multi=48.8407_len=10690	Pisuviricota	d__Bacteria;p__Proteobacteria;c__Gammaproteobacteria;o__Pseudomonadales;f__Pseudomonadaceae;g__Pseudomonas;s__Pseudomonas aeruginosa	22	0	0.000533
101034977	SRR11828805|k141_11533_flag=1_multi=89.8329_len=3648	Kitrinoviricota	d__Bacteria;p__Proteobacteria;c__Gammaproteobacteria;o__Pseudomonadales;f__Pseudomonadaceae;g__Pseudomonas;s__Pseudomonas aeruginosa	22	0	0.000533
101034977	SRR17509978|k141_113185_flag=1_multi=9.0000_len=1199	Pisuviricota	d__Bacteria;p__Proteobacteria;c__Gammaproteobacteria;o__Pseudomonadales;f__Pseudomonadaceae;g__Pseudomonas;s__Pseudomonas aeruginosa	22	0	0.000533
101034977	SRR17509940|k141_147462_flag=1_multi=29.0000_len=3674	Unclassified	d__Bacteria;p__Proteobacteria;c__Gammaproteobacteria;o__Pseudomonadales;f__Pseudomonadaceae;g__Pseudomonas;s__Pseudomonas aeruginosa	24	0	4.12e-05
101037788	SRR11648413|k141_155839_flag=0_multi=32.5524_len=1714	Lenarviricota	d__Bacteria;p__Proteobacteria;c__Gammaproteobacteria;o__Enterobacterales;f__Enterobacteriaceae;g__Salmonella;s__Salmonella enterica	23	0	0.000333
101037812	SRR11648413|k141_155839_flag=0_multi=32.5524_len=1714	Lenarviricota	d__Bacteria;p__Proteobacteria;c__Gammaproteobacteria;o__Enterobacterales;f__Enterobacteriaceae;g__Salmonella;s__Salmonella enterica	23	0	0.000333
101051966	SRR11829143|k141_198256_flag=1_multi=13.1560_len=8536	Pisuviricota	d__Bacteria;p__Firmicutes;c__Bacilli;o__Bacillales;f__Bacillaceae_G;g__Bacillus_A;s__Bacillus_A cytotoxicus	23	0	0.000296
101061444	SRR11828459|k141_18049_flag=1_multi=4.0000_len=1029	Duplornaviricota	d__Bacteria;p__Firmicutes_A;c__Clostridia;o__Peptostreptococcales;f__Peptostreptococcaceae;g__Clostridioides;s__Clostridioides difficile	29	1	1.11e-05
101068812	SRR11827439|k141_109350_flag=1_multi=4.0000_len=2497	Duplornaviricota	d__Bacteria;p__Firmicutes_A;c__Clostridia;o__Peptostreptococcales;f__Peptostreptococcaceae;g__Clostridioides;s__Clostridioides difficile	26	1	0.000481
101078141	SRR11828459|k141_18049_flag=1_multi=4.0000_len=1029	Duplornaviricota	d__Bacteria;p__Firmicutes_A;c__Clostridia;o__Peptostreptococcales;f__Peptostreptococcaceae;g__Clostridioides;s__Clostridioides difficile	29	1	1.11e-05
101087575	SRR11648413|k141_155839_flag=0_multi=32.5524_len=1714	Lenarviricota	d__Bacteria;p__Proteobacteria;c__Gammaproteobacteria;o__Enterobacterales;f__Enterobacteriaceae;g__Salmonella;s__Salmonella enterica	23	0	0.000333
101096746	SRR11828459|k141_18049_flag=1_multi=4.0000_len=1029	Duplornaviricota	d__Bacteria;p__Firmicutes_A;c__Clostridia;o__Peptostreptococcales;f__Peptostreptococcaceae;g__Clostridioides;s__Clostridioides difficile	29	1	1.11e-05
101098382	SRR11828459|k141_18049_flag=1_multi=4.0000_len=1029	Duplornaviricota	d__Bacteria;p__Firmicutes_A;c__Clostridia;o__Peptostreptococcales;f__Peptostreptococcaceae;g__Clostridioides;s__Clostridioides difficile	29	1	1.11e-05
101101619	SRR11829261|k141_152797_flag=1_multi=151.2792_len=2526	Kitrinoviricota	d__Bacteria;p__Firmicutes_A;c__Clostridia;o__Peptostreptococcales;f__Peptostreptococcaceae;g__Clostridioides;s__Clostridioides difficile	25	0	4.29e-05
101102802	SRR11827439|k141_109350_flag=1_multi=4.0000_len=2497	Duplornaviricota	d__Bacteria;p__Firmicutes_A;c__Clostridia;o__Peptostreptococcales;f__Peptostreptococcaceae;g__Clostridioides;s__Clostridioides difficile	26	1	0.000518
101103744	SRR11829105|k141_244462_flag=1_multi=21.0000_len=4982	Kitrinoviricota	d__Bacteria;p__Cyanobacteria;c__Cyanobacteriia;o__Cyanobacteriales;f__Nostocaceae;g__Dolichospermum;s__Dolichospermum flosaquae	30	1	4.64e-06
101103744	SRR7539306|k141_99293_flag=0_multi=371.0000_len=2608	Kitrinoviricota	d__Bacteria;p__Cyanobacteria;c__Cyanobacteriia;o__Cyanobacteriales;f__Nostocaceae;g__Dolichospermum;s__Dolichospermum flosaquae	30	2	0.000216
101103744	SRR11648176|k141_289439_flag=1_multi=9.0000_len=3612	Pisuviricota	d__Bacteria;p__Cyanobacteria;c__Cyanobacteriia;o__Cyanobacteriales;f__Nostocaceae;g__Dolichospermum;s__Dolichospermum flosaquae	31	1	1.29e-06
101103744	SRR11829144|k141_21356_flag=1_multi=12.0000_len=4379	Unclassified	d__Bacteria;p__Cyanobacteria;c__Cyanobacteriia;o__Cyanobacteriales;f__Nostocaceae;g__Dolichospermum;s__Dolichospermum flosaquae	26	0	1.67e-05
101103744	SRR11678561|k141_549_flag=1_multi=16.0000_len=4400	Kitrinoviricota	d__Bacteria;p__Cyanobacteria;c__Cyanobacteriia;o__Cyanobacteriales;f__Nostocaceae;g__Dolichospermum;s__Dolichospermum flosaquae	26	1	0.000777
101103744	SRR14530881|k119_2547_flag=1_multi=49.0000_len=5946	Kitrinoviricota	d__Bacteria;p__Cyanobacteria;c__Cyanobacteriia;o__Cyanobacteriales;f__Nostocaceae;g__Dolichospermum;s__Dolichospermum flosaquae	30	1	4.64e-06
101103744	SRR7004412|k141_66391_flag=1_multi=15.0000_len=6156	Pisuviricota	d__Bacteria;p__Cyanobacteria;c__Cyanobacteriia;o__Cyanobacteriales;f__Nostocaceae;g__Dolichospermum;s__Dolichospermum flosaquae	29	1	1.67e-05
101106040	SRR7004668|k141_19464_flag=1_multi=6.0000_len=4016	Lenarviricota	d__Bacteria;p__Bacteroidota;c__Kryptonia;o__Kryptoniales;f__Kryptoniaceae;g__Kryptonium;s__Kryptonium thompsoni	26	1	0.000518
101106346	SRR17497117|k141_449346_flag=1_multi=7.0000_len=2124	Duplornaviricota	d__Bacteria;p__Bacteroidota;c__Bacteroidia;o__Bacteroidales;f__UBA932;g__Cryptobacteroides;s__Cryptobacteroides sp000433355	31	1	0.000165
101114674	SRR11828806|k141_166307_flag=1_multi=10.0000_len=7065	Negarnaviricota	d__Bacteria;p__Firmicutes_A;c__Clostridia;o__Peptostreptococcales;f__Peptostreptococcaceae;g__Clostridioides;s__Clostridioides difficile	31	1	0.000154
101115813	SRR11828459|k141_18049_flag=1_multi=4.0000_len=1029	Duplornaviricota	d__Bacteria;p__Firmicutes_A;c__Clostridia;o__Peptostreptococcales;f__Peptostreptococcaceae;g__Clostridioides;s__Clostridioides difficile	29	1	1.11e-05
101117587	SRR11828459|k141_18049_flag=1_multi=4.0000_len=1029	Duplornaviricota	d__Bacteria;p__Firmicutes_A;c__Clostridia;o__Peptostreptococcales;f__Peptostreptococcaceae;g__Clostridioides;s__Clostridioides difficile	29	1	1.11e-05
101123661	BC-0332571351|k141_66805	Duplornaviricota	d__Bacteria;p__Campylobacterota;c__Campylobacteria;o__Campylobacterales;f__Arcobacteraceae;g__Malaciobacter;s__Malaciobacter molluscorum	30	1	0.000444
101123666	BC-0332571351|k141_66805	Duplornaviricota	d__Bacteria;p__Campylobacterota;c__Campylobacteria;o__Campylobacterales;f__Arcobacteraceae;g__Malaciobacter;s__Malaciobacter molluscorum	30	1	0.000444
101135180	SRR11827439|k141_109350_flag=1_multi=4.0000_len=2497	Duplornaviricota	d__Bacteria;p__Firmicutes_A;c__Clostridia;o__Peptostreptococcales;f__Peptostreptococcaceae;g__Clostridioides;s__Clostridioides difficile	26	1	0.000481
101136909	SRR11648413|k141_155839_flag=0_multi=32.5524_len=1714	Lenarviricota	d__Bacteria;p__Proteobacteria;c__Gammaproteobacteria;o__Enterobacterales;f__Enterobacteriaceae;g__Salmonella;s__Salmonella enterica	23	0	0.000333
101140092	SRR11829261|k141_152797_flag=1_multi=151.2792_len=2526	Kitrinoviricota	d__Bacteria;p__Firmicutes_A;c__Clostridia;o__Peptostreptococcales;f__Peptostreptococcaceae;g__Clostridioides;s__Clostridioides difficile	25	0	4.29e-05
101142368	SRR11565175|k141_273843_flag=1_multi=5.0000_len=4122	Kitrinoviricota	d__Bacteria;p__Firmicutes;c__Bacilli;o__Bacillales;f__Bacillaceae_G;g__Bacillus_A;s__Bacillus_A bombysepticus	27	1	0.000329
101149967	SRR11827439|k141_109350_flag=1_multi=4.0000_len=2497	Duplornaviricota	d__Bacteria;p__Firmicutes_A;c__Clostridia;o__Peptostreptococcales;f__Peptostreptococcaceae;g__Clostridioides;s__Clostridioides difficile	26	1	0.000481
101156216	SRR11076227|k141_564324_flag=1_multi=26.0000_len=9102	Negarnaviricota	d__Bacteria;p__Firmicutes;c__Bacilli;o__Lactobacillales;f__Streptococcaceae;g__Streptococcus;s__Streptococcus agalactiae	27	1	9.26e-05
101158587	SRR11829261|k141_152797_flag=1_multi=151.2792_len=2526	Kitrinoviricota	d__Bacteria;p__Firmicutes_A;c__Clostridia;o__Peptostreptococcales;f__Peptostreptococcaceae;g__Clostridioides;s__Clostridioides difficile	25	0	4.29e-05
101159147	SRR11450577|k141_49909_flag=1_multi=26.0000_len=3983	Lenarviricota	d__Bacteria;p__Firmicutes_A;c__Clostridia;o__Lachnospirales;f__Lachnospiraceae;g__Roseburia;s__Roseburia intestinalis	26	1	0.000814
101162810	SRR11829261|k141_152797_flag=1_multi=151.2792_len=2526	Kitrinoviricota	d__Bacteria;p__Firmicutes_A;c__Clostridia;o__Peptostreptococcales;f__Peptostreptococcaceae;g__Clostridioides;s__Clostridioides difficile	25	0	4.29e-05
101166169	SRR11076227|k141_564324_flag=1_multi=26.0000_len=9102	Negarnaviricota	d__Bacteria;p__Firmicutes;c__Bacilli;o__Lactobacillales;f__Streptococcaceae;g__Streptococcus;s__Streptococcus agalactiae	27	1	9.26e-05
101174470	SRR11828959|k141_50024_flag=1_multi=8.0000_len=5364	urv.p.001	d__Bacteria;p__Bacteroidota;c__Bacteroidia;o__Bacteroidales;f__Bacteroidaceae;g__UBA4372;s__UBA4372 sp017466325	22	0	0.000666
101174571	SRR7536466|k141_280789_flag=1_multi=14.0000_len=9202	Pisuviricota	d__Bacteria;p__Proteobacteria;c__Gammaproteobacteria;o__Burkholderiales;f__Neisseriaceae;g__Neisseria;s__Neisseria meningitidis	26	1	0.000296
101177697	SRR11827439|k141_109350_flag=1_multi=4.0000_len=2497	Duplornaviricota	d__Bacteria;p__Firmicutes_A;c__Clostridia;o__Peptostreptococcales;f__Peptostreptococcaceae;g__Clostridioides;s__Clostridioides difficile	26	1	0.000481
101178790	SRR11829261|k141_152797_flag=1_multi=151.2792_len=2526	Kitrinoviricota	d__Bacteria;p__Firmicutes_A;c__Clostridia;o__Peptostreptococcales;f__Peptostreptococcaceae;g__Clostridioides;s__Clostridioides difficile	25	0	4.29e-05
101183117	SRR11565178|k141_258900_flag=1_multi=80.0000_len=9508	Unclassified	d__Bacteria;p__Proteobacteria;c__Gammaproteobacteria;o__Enterobacterales;f__Vibrionaceae;g__Vibrio;s__Vibrio cholerae	23	0	0.00037
101183180	SRR11565178|k141_258900_flag=1_multi=80.0000_len=9508	Unclassified	d__Bacteria;p__Proteobacteria;c__Gammaproteobacteria;o__Enterobacterales;f__Vibrionaceae;g__Vibrio;s__Vibrio cholerae	23	0	0.00037
101186332	SRR11829261|k141_152797_flag=1_multi=151.2792_len=2526	Kitrinoviricota	d__Bacteria;p__Firmicutes_A;c__Clostridia;o__Peptostreptococcales;f__Peptostreptococcaceae;g__Clostridioides;s__Clostridioides difficile	25	0	4.29e-05
101194569	SRR11076227|k141_564324_flag=1_multi=26.0000_len=9102	Negarnaviricota	d__Bacteria;p__Firmicutes;c__Bacilli;o__Lactobacillales;f__Streptococcaceae;g__Streptococcus;s__Streptococcus agalactiae	27	1	9.26e-05
101197721	SRR11076227|k141_564324_flag=1_multi=26.0000_len=9102	Negarnaviricota	d__Bacteria;p__Firmicutes;c__Bacilli;o__Lactobacillales;f__Streptococcaceae;g__Streptococcus;s__Streptococcus agalactiae	27	1	9.26e-05
101199388	SRR11648413|k141_155839_flag=0_multi=32.5524_len=1714	Lenarviricota	d__Bacteria;p__Proteobacteria;c__Gammaproteobacteria;o__Enterobacterales;f__Enterobacteriaceae;g__Salmonella;s__Salmonella enterica	23	0	0.000333
101199537	SRR11828459|k141_18049_flag=1_multi=4.0000_len=1029	Duplornaviricota	d__Bacteria;p__Firmicutes_A;c__Clostridia;o__Peptostreptococcales;f__Peptostreptococcaceae;g__Clostridioides;s__Clostridioides difficile	29	1	1.11e-05
101201712	SRR11828459|k141_18049_flag=1_multi=4.0000_len=1029	Duplornaviricota	d__Bacteria;p__Firmicutes_A;c__Clostridia;o__Peptostreptococcales;f__Peptostreptococcaceae;g__Clostridioides;s__Clostridioides difficile	29	1	1.11e-05
101203345	SRR11828897|k141_13820_flag=1_multi=9.0000_len=4159	Unclassified	d__Bacteria;p__Actinobacteriota;c__Actinomycetia;o__Nanopelagicales;f__Nanopelagicaceae;g__GCA-2737595;s__GCA-2737595 sp903863015	27	1	0.000278
101209033	SRR11827439|k141_109350_flag=1_multi=4.0000_len=2497	Duplornaviricota	d__Bacteria;p__Firmicutes_A;c__Clostridia;o__Peptostreptococcales;f__Peptostreptococcaceae;g__Clostridioides;s__Clostridioides difficile	26	1	0.000481
101211806	SRR11827439|k141_109350_flag=1_multi=4.0000_len=2497	Duplornaviricota	d__Bacteria;p__Firmicutes_A;c__Clostridia;o__Peptostreptococcales;f__Peptostreptococcaceae;g__Clostridioides;s__Clostridioides difficile	26	1	0.000518
101222581	SRR11829261|k141_152797_flag=1_multi=151.2792_len=2526	Kitrinoviricota	d__Bacteria;p__Firmicutes_A;c__Clostridia;o__Peptostreptococcales;f__Peptostreptococcaceae;g__Clostridioides;s__Clostridioides difficile	25	0	4.29e-05
101228506	SRR11648413|k141_155839_flag=0_multi=32.5524_len=1714	Lenarviricota	d__Bacteria;p__Proteobacteria;c__Gammaproteobacteria;o__Enterobacterales;f__Enterobacteriaceae;g__Salmonella;s__Salmonella enterica	23	0	0.000333
101233058	SRR11829261|k141_152797_flag=1_multi=151.2792_len=2526	Kitrinoviricota	d__Bacteria;p__Firmicutes_A;c__Clostridia;o__Peptostreptococcales;f__Peptostreptococcaceae;g__Clostridioides;s__Clostridioides difficile	25	0	4.29e-05
101240101	SRR11829101|k141_170810_flag=1_multi=15.0000_len=5608	Kitrinoviricota	d__Bacteria;p__Firmicutes_A;c__Clostridia;o__Peptostreptococcales;f__Peptostreptococcaceae;g__Clostridioides;s__Clostridioides difficile	30	0	1.11e-05
101259127	SRR7535021|k141_116884_flag=1_multi=10.0000_len=6594	Pisuviricota	d__Bacteria;p__Firmicutes;c__Bacilli;o__Lactobacillales;f__Listeriaceae;g__Listeria_A;s__Listeria_A booriae	32	1	6.29e-05
101264716	SRR7539092|k141_497500_flag=1_multi=13.0000_len=9135	Pisuviricota	d__Bacteria;p__Firmicutes;c__Bacilli;o__Staphylococcales;f__Staphylococcaceae;g__Staphylococcus;s__Staphylococcus aureus	27	1	0.000123
101264716	SRR17481244|k141_434_flag=1_multi=161.0000_len=2746	Kitrinoviricota	d__Bacteria;p__Firmicutes;c__Bacilli;o__Staphylococcales;f__Staphylococcaceae;g__Staphylococcus;s__Staphylococcus aureus	27	1	0.000123
101264718	SRR12632510|k141_128094_flag=1_multi=39.9044_len=2003	Pisuviricota	d__Bacteria;p__Firmicutes;c__Bacilli;o__Staphylococcales;f__Staphylococcaceae;g__Staphylococcus;s__Staphylococcus aureus	25	0	2.29e-05
101264718	SRR10904365|k141_287437_flag=1_multi=32.0000_len=4454	Kitrinoviricota	d__Bacteria;p__Firmicutes;c__Bacilli;o__Staphylococcales;f__Staphylococcaceae;g__Staphylococcus;s__Staphylococcus aureus	23	0	0.000296
101264718	SRR18771403|k141_151425_flag=1_multi=273.0000_len=4480	Lenarviricota	d__Bacteria;p__Firmicutes;c__Bacilli;o__Staphylococcales;f__Staphylococcaceae;g__Staphylococcus;s__Staphylococcus aureus	27	0	0.000296
101264718	SRR18770940|k141_131164_flag=1_multi=223.0000_len=8177	Pisuviricota	d__Bacteria;p__Firmicutes;c__Bacilli;o__Staphylococcales;f__Staphylococcaceae;g__Staphylococcus;s__Staphylococcus aureus	23	0	0.000296
101264718	SRR18771403|k141_12334_flag=1_multi=224.0000_len=9334	Pisuviricota	d__Bacteria;p__Firmicutes;c__Bacilli;o__Staphylococcales;f__Staphylococcaceae;g__Staphylococcus;s__Staphylococcus aureus	23	0	0.000296
101264718	BC-0345317873|k141_88724	Pisuviricota	d__Bacteria;p__Firmicutes;c__Bacilli;o__Staphylococcales;f__Staphylococcaceae;g__Staphylococcus;s__Staphylococcus aureus	23	0	0.000296
101264718	SRR17497063|k141_241810_flag=1_multi=46.0000_len=2686	Pisuviricota	d__Bacteria;p__Firmicutes;c__Bacilli;o__Staphylococcales;f__Staphylococcaceae;g__Staphylococcus;s__Staphylococcus aureus	23	0	0.000296
101264718	SRR11647857|k141_256089_flag=1_multi=53.7354_len=5197	Kitrinoviricota	d__Bacteria;p__Firmicutes;c__Bacilli;o__Staphylococcales;f__Staphylococcaceae;g__Staphylococcus;s__Staphylococcus aureus	23	0	0.000296
101264718	SRR11450577|k141_193754_flag=1_multi=84.0000_len=8351	Pisuviricota	d__Bacteria;p__Firmicutes;c__Bacilli;o__Staphylococcales;f__Staphylococcaceae;g__Staphylococcus;s__Staphylococcus aureus	27	1	8.23e-05
101264718	SRR7539092|k141_497500_flag=1_multi=13.0000_len=9135	Pisuviricota	d__Bacteria;p__Firmicutes;c__Bacilli;o__Staphylococcales;f__Staphylococcaceae;g__Staphylococcus;s__Staphylococcus aureus	28	1	2.29e-05
101264718	SRR11648360|k141_238775_flag=1_multi=340.0000_len=9219	Pisuviricota	d__Bacteria;p__Firmicutes;c__Bacilli;o__Staphylococcales;f__Staphylococcaceae;g__Staphylococcus;s__Staphylococcus aureus	23	0	0.000296
101264718	SRR5829926|k141_223325_flag=1_multi=36.0000_len=9335	Pisuviricota	d__Bacteria;p__Firmicutes;c__Bacilli;o__Staphylococcales;f__Staphylococcaceae;g__Staphylococcus;s__Staphylococcus aureus	23	0	0.000296
101264718	SRR11828900|k141_55027_flag=1_multi=15.0000_len=8550	Pisuviricota	d__Bacteria;p__Firmicutes;c__Bacilli;o__Staphylococcales;f__Staphylococcaceae;g__Staphylococcus;s__Staphylococcus aureus	26	1	0.000296
101264718	BC-0345698157|k141_28560	Pisuviricota	d__Bacteria;p__Firmicutes;c__Bacilli;o__Staphylococcales;f__Staphylococcaceae;g__Staphylococcus;s__Staphylococcus aureus	26	1	0.000296
101264718	SRR18771403|k141_60396_flag=1_multi=725.0000_len=9266	Pisuviricota	d__Bacteria;p__Firmicutes;c__Bacilli;o__Staphylococcales;f__Staphylococcaceae;g__Staphylococcus;s__Staphylococcus aureus	24	0	8.23e-05
101264718	SRR17497103|k141_39072_flag=1_multi=16.8887_len=2072	Kitrinoviricota	d__Bacteria;p__Firmicutes;c__Bacilli;o__Staphylococcales;f__Staphylococcaceae;g__Staphylococcus;s__Staphylococcus aureus	27	1	8.23e-05
101264718	SRR18770930|k141_46830_flag=1_multi=532.0000_len=9156	Pisuviricota	d__Bacteria;p__Firmicutes;c__Bacilli;o__Staphylococcales;f__Staphylococcaceae;g__Staphylococcus;s__Staphylococcus aureus	23	0	0.000296
101264718	SRR11450580|k141_288389_flag=1_multi=108.0000_len=9065	Pisuviricota	d__Bacteria;p__Firmicutes;c__Bacilli;o__Staphylococcales;f__Staphylococcaceae;g__Staphylococcus;s__Staphylococcus aureus	28	1	2.29e-05
101264718	SRR11828458|k141_115621_flag=1_multi=34.0000_len=5046	Kitrinoviricota	d__Bacteria;p__Firmicutes;c__Bacilli;o__Staphylococcales;f__Staphylococcaceae;g__Staphylococcus;s__Staphylococcus aureus	26	0	6.36e-06
101264718	SRR11829260|k141_2197_flag=1_multi=57.0000_len=4196	Kitrinoviricota	d__Bacteria;p__Firmicutes;c__Bacilli;o__Staphylococcales;f__Staphylococcaceae;g__Staphylococcus;s__Staphylococcus aureus	24	0	8.23e-05
101264718	SRR18771403|k141_22621_flag=1_multi=91.4202_len=8303	Pisuviricota	d__Bacteria;p__Firmicutes;c__Bacilli;o__Staphylococcales;f__Staphylococcaceae;g__Staphylococcus;s__Staphylococcus aureus	30	0	6.36e-06
101264718	BC-0345794107|k141_11800	Pisuviricota	d__Bacteria;p__Firmicutes;c__Bacilli;o__Staphylococcales;f__Staphylococcaceae;g__Staphylococcus;s__Staphylococcus aureus	23	0	0.000296
101264718	SRR18770931|k141_95068_flag=1_multi=557.0000_len=11237	Pisuviricota	d__Bacteria;p__Firmicutes;c__Bacilli;o__Staphylococcales;f__Staphylococcaceae;g__Staphylococcus;s__Staphylococcus aureus	26	1	0.000296
101264718	SRR17481244|k141_434_flag=1_multi=161.0000_len=2746	Kitrinoviricota	d__Bacteria;p__Firmicutes;c__Bacilli;o__Staphylococcales;f__Staphylococcaceae;g__Staphylococcus;s__Staphylococcus aureus	25	0	2.29e-05
101264718	SRR12686088|k141_14412_flag=1_multi=15.0000_len=5750	Pisuviricota	d__Bacteria;p__Firmicutes;c__Bacilli;o__Staphylococcales;f__Staphylococcaceae;g__Staphylococcus;s__Staphylococcus aureus	23	0	0.000296
101286814	SRR11076227|k141_564324_flag=1_multi=26.0000_len=9102	Negarnaviricota	d__Bacteria;p__Firmicutes;c__Bacilli;o__Lactobacillales;f__Streptococcaceae;g__Streptococcus;s__Streptococcus agalactiae	27	1	9.26e-05
101288090	SRR11648413|k141_155839_flag=0_multi=32.5524_len=1714	Lenarviricota	d__Bacteria;p__Proteobacteria;c__Gammaproteobacteria;o__Enterobacterales;f__Enterobacteriaceae;g__Salmonella;s__Salmonella enterica	23	0	0.000333
101288123	SRR11648413|k141_155839_flag=0_multi=32.5524_len=1714	Lenarviricota	d__Bacteria;p__Proteobacteria;c__Gammaproteobacteria;o__Enterobacterales;f__Enterobacteriaceae;g__Salmonella;s__Salmonella enterica	23	0	0.000333
101295603	SRR17497063|k141_83187_flag=1_multi=14.0000_len=3432	Lenarviricota	d__Bacteria;p__Cyanobacteria;c__Cyanobacteriia;o__Cyanobacteriales;f__Desertifilaceae;g__Roseofilum;s__Roseofilum reptotaenium_A	29	1	1.35e-05
101307378	SRR11828459|k141_18049_flag=1_multi=4.0000_len=1029	Duplornaviricota	d__Bacteria;p__Firmicutes_A;c__Clostridia;o__Peptostreptococcales;f__Peptostreptococcaceae;g__Clostridioides;s__Clostridioides difficile	29	1	1.11e-05
101309616	SRR11829101|k141_170810_flag=1_multi=15.0000_len=5608	Kitrinoviricota	d__Bacteria;p__Firmicutes_A;c__Clostridia;o__Peptostreptococcales;f__Peptostreptococcaceae;g__Clostridioides;s__Clostridioides difficile	30	0	1.11e-05
101310739	SRR17497104|k141_42863_flag=1_multi=4.0000_len=1013	Lenarviricota	d__Bacteria;p__Bacteroidota;c__Bacteroidia;o__AKYH767-A;f__2013-40CM-41-45;g__JADKIH01;s__JADKIH01 sp016711505	26	1	0.000259
101319360	SRR11828459|k141_18049_flag=1_multi=4.0000_len=1029	Duplornaviricota	d__Bacteria;p__Firmicutes_A;c__Clostridia;o__Peptostreptococcales;f__Peptostreptococcaceae;g__Clostridioides;s__Clostridioides difficile	29	1	1.11e-05
101322980	SRR7539006|k141_895006_flag=1_multi=5.0000_len=1941	Lenarviricota	d__Bacteria;p__Firmicutes;c__Bacilli;o__Lactobacillales;f__Listeriaceae;g__Listeria;s__Listeria monocytogenes	28	0	8.23e-05
101325580	SRR11648413|k141_155839_flag=0_multi=32.5524_len=1714	Lenarviricota	d__Bacteria;p__Proteobacteria;c__Gammaproteobacteria;o__Enterobacterales;f__Enterobacteriaceae;g__Salmonella;s__Salmonella enterica	23	0	0.000333
101328696	SRR11648413|k141_155839_flag=0_multi=32.5524_len=1714	Lenarviricota	d__Bacteria;p__Proteobacteria;c__Gammaproteobacteria;o__Enterobacterales;f__Enterobacteriaceae;g__Salmonella;s__Salmonella enterica	23	0	0.000333
101329204	SRR11827439|k141_109350_flag=1_multi=4.0000_len=2497	Duplornaviricota	d__Bacteria;p__Firmicutes_A;c__Clostridia;o__Peptostreptococcales;f__Peptostreptococcaceae;g__Clostridioides;s__Clostridioides difficile	26	1	0.000518
101338620	SRR11827439|k141_109350_flag=1_multi=4.0000_len=2497	Duplornaviricota	d__Bacteria;p__Firmicutes_A;c__Clostridia;o__Peptostreptococcales;f__Peptostreptococcaceae;g__Clostridioides;s__Clostridioides difficile	26	1	0.000481
101341239	SRR11828459|k141_18049_flag=1_multi=4.0000_len=1029	Duplornaviricota	d__Bacteria;p__Firmicutes_A;c__Clostridia;o__Peptostreptococcales;f__Peptostreptococcaceae;g__Clostridioides;s__Clostridioides difficile	29	1	1.11e-05
101349587	SRR11829261|k141_152797_flag=1_multi=151.2792_len=2526	Kitrinoviricota	d__Bacteria;p__Firmicutes_A;c__Clostridia;o__Peptostreptococcales;f__Peptostreptococcaceae;g__Clostridioides;s__Clostridioides difficile	25	0	4.29e-05
101356270	SRR11829101|k141_170810_flag=1_multi=15.0000_len=5608	Kitrinoviricota	d__Bacteria;p__Firmicutes_A;c__Clostridia;o__Peptostreptococcales;f__Peptostreptococcaceae;g__Clostridioides;s__Clostridioides difficile	30	0	1.11e-05
101356483	SRR5829933|k141_49460_flag=1_multi=23.3251_len=6275	Pisuviricota	d__Archaea;p__Halobacteriota;c__Halobacteria;o__Halobacteriales;f__Haloferacaceae;g__Halobellus;s__Halobellus salinus	24	0	0.000144
101373324	SRR11829261|k141_152797_flag=1_multi=151.2792_len=2526	Kitrinoviricota	d__Bacteria;p__Firmicutes_A;c__Clostridia;o__Peptostreptococcales;f__Peptostreptococcaceae;g__Clostridioides;s__Clostridioides difficile	25	0	4.29e-05
101375691	SRR11829261|k141_152797_flag=1_multi=151.2792_len=2526	Kitrinoviricota	d__Bacteria;p__Firmicutes_A;c__Clostridia;o__Peptostreptococcales;f__Peptostreptococcaceae;g__Clostridioides;s__Clostridioides difficile	25	0	4.29e-05
101387318	SRR11829261|k141_152797_flag=1_multi=151.2792_len=2526	Kitrinoviricota	d__Bacteria;p__Firmicutes_A;c__Clostridia;o__Peptostreptococcales;f__Peptostreptococcaceae;g__Clostridioides;s__Clostridioides difficile	25	0	4.29e-05
101390560	SRR11828459|k141_18049_flag=1_multi=4.0000_len=1029	Duplornaviricota	d__Bacteria;p__Firmicutes_A;c__Clostridia;o__Peptostreptococcales;f__Peptostreptococcaceae;g__Clostridioides;s__Clostridioides difficile	29	1	1.11e-05
101400022	SRR11829261|k141_152797_flag=1_multi=151.2792_len=2526	Kitrinoviricota	d__Bacteria;p__Firmicutes_A;c__Clostridia;o__Peptostreptococcales;f__Peptostreptococcaceae;g__Clostridioides;s__Clostridioides difficile	25	0	4.29e-05
101403905	SRR11829261|k141_152797_flag=1_multi=151.2792_len=2526	Kitrinoviricota	d__Bacteria;p__Firmicutes_A;c__Clostridia;o__Peptostreptococcales;f__Peptostreptococcaceae;g__Clostridioides;s__Clostridioides difficile	25	0	4.29e-05
101408298	SRR11829101|k141_283466_flag=1_multi=18.0000_len=3839	Lenarviricota	d__Archaea;p__Halobacteriota;c__Halobacteria;o__Halobacteriales;f__Natronoarchaeaceae;g__Natronoarchaeum;s__Natronoarchaeum sp017094485	27	0	0.000444
101416115	SRR11828459|k141_18049_flag=1_multi=4.0000_len=1029	Duplornaviricota	d__Bacteria;p__Firmicutes_A;c__Clostridia;o__Peptostreptococcales;f__Peptostreptococcaceae;g__Clostridioides;s__Clostridioides difficile	29	1	1.11e-05
101420217	SRR11827439|k141_109350_flag=1_multi=4.0000_len=2497	Duplornaviricota	d__Bacteria;p__Firmicutes_A;c__Clostridia;o__Peptostreptococcales;f__Peptostreptococcaceae;g__Clostridioides;s__Clostridioides difficile	26	1	0.000481
101424613	SRR11829261|k141_152797_flag=1_multi=151.2792_len=2526	Kitrinoviricota	d__Bacteria;p__Firmicutes_A;c__Clostridia;o__Peptostreptococcales;f__Peptostreptococcaceae;g__Clostridioides;s__Clostridioides difficile	25	0	4.29e-05
101425607	SRR11828460|k141_32351_flag=0_multi=30.7923_len=3786	Pisuviricota	d__Bacteria;p__Firmicutes;c__Bacilli;o__Lactobacillales;f__Streptococcaceae;g__Streptococcus;s__Streptococcus sobrinus	23	0	0.00037
101440792	SRR11622682|k141_810416_flag=1_multi=8.0000_len=7563	Kitrinoviricota	d__Bacteria;p__Firmicutes_A;c__Clostridia;o__Lachnospirales;f__WRAX01;g__WRAC01;s__WRAC01 sp009780415	23	0	0.000518
101441463	BC-0345724493|k141_59447	Duplornaviricota	d__Bacteria;p__Actinobacteriota;c__Actinomycetia;o__Actinomycetales;f__Dermatophilaceae;g__F2B08;s__F2B08 sp012838445	27	1	0.000134
101441463	BC-0338318897|k141_101245	Kitrinoviricota	d__Bacteria;p__Actinobacteriota;c__Actinomycetia;o__Actinomycetales;f__Dermatophilaceae;g__F2B08;s__F2B08 sp012838445	23	0	0.000481
101443587	SRR11828459|k141_18049_flag=1_multi=4.0000_len=1029	Duplornaviricota	d__Bacteria;p__Firmicutes_A;c__Clostridia;o__Peptostreptococcales;f__Peptostreptococcaceae;g__Clostridioides;s__Clostridioides difficile	29	1	1.11e-05
101444185	SRR11828459|k141_18049_flag=1_multi=4.0000_len=1029	Duplornaviricota	d__Bacteria;p__Firmicutes_A;c__Clostridia;o__Peptostreptococcales;f__Peptostreptococcaceae;g__Clostridioides;s__Clostridioides difficile	29	1	1.11e-05
101447447	SRR11828459|k141_18049_flag=1_multi=4.0000_len=1029	Duplornaviricota	d__Bacteria;p__Firmicutes_A;c__Clostridia;o__Peptostreptococcales;f__Peptostreptococcaceae;g__Clostridioides;s__Clostridioides difficile	29	1	1.11e-05
101461682	SRR11829261|k141_152797_flag=1_multi=151.2792_len=2526	Kitrinoviricota	d__Bacteria;p__Firmicutes_A;c__Clostridia;o__Peptostreptococcales;f__Peptostreptococcaceae;g__Clostridioides;s__Clostridioides difficile	25	0	4e-05
101462130	SRR13696271|k141_136114_flag=1_multi=11.0000_len=4242	Lenarviricota	d__Archaea;p__Nanoarchaeota;c__Nanoarchaeia;o__Woesearchaeales;f__B54-G15;g__B54-G15;s__	26	1	0.000518
101472169	SRR11076227|k141_564324_flag=1_multi=26.0000_len=9102	Negarnaviricota	d__Bacteria;p__Firmicutes;c__Bacilli;o__Lactobacillales;f__Streptococcaceae;g__Streptococcus;s__Streptococcus agalactiae	27	1	9.26e-05
101474218	SRR8549878|k141_75037_flag=1_multi=22.3329_len=2568	Kitrinoviricota	d__Bacteria;p__Actinobacteriota;c__Coriobacteriia;o__OPB41;f__UBA912;g__JAGXSC01;s__JAGXSC01 sp018334075	23	0	0.000444
101476981	SRR11829261|k141_152797_flag=1_multi=151.2792_len=2526	Kitrinoviricota	d__Bacteria;p__Firmicutes_A;c__Clostridia;o__Peptostreptococcales;f__Peptostreptococcaceae;g__Clostridioides;s__Clostridioides difficile	25	0	4.29e-05
101477026	SRR7004409|k141_227153_flag=1_multi=10.0000_len=4923	Pisuviricota	d__Bacteria;p__Proteobacteria;c__Alphaproteobacteria;o__Rhodobacterales;f__Rhodobacteraceae;g__Marivita;s__Marivita geojedonensis	25	1	0.000799
101483989	SRR11828459|k141_18049_flag=1_multi=4.0000_len=1029	Duplornaviricota	d__Bacteria;p__Firmicutes_A;c__Clostridia;o__Peptostreptococcales;f__Peptostreptococcaceae;g__Clostridioides;s__Clostridioides difficile	29	1	1.11e-05
101491605	SRR11648413|k141_155839_flag=0_multi=32.5524_len=1714	Lenarviricota	d__Bacteria;p__Proteobacteria;c__Gammaproteobacteria;o__Enterobacterales;f__Enterobacteriaceae;g__Salmonella;s__Salmonella enterica	23	0	0.000333
101501637	SRR11829261|k141_152797_flag=1_multi=151.2792_len=2526	Kitrinoviricota	d__Bacteria;p__Firmicutes_A;c__Clostridia;o__Peptostreptococcales;f__Peptostreptococcaceae;g__Clostridioides;s__Clostridioides difficile	25	0	4.29e-05
101504624	SRR11828459|k141_18049_flag=1_multi=4.0000_len=1029	Duplornaviricota	d__Bacteria;p__Firmicutes_A;c__Clostridia;o__Peptostreptococcales;f__Peptostreptococcaceae;g__Clostridioides;s__Clostridioides difficile	29	1	1.11e-05
101507685	SRR11829261|k141_152797_flag=1_multi=151.2792_len=2526	Kitrinoviricota	d__Bacteria;p__Firmicutes_A;c__Clostridia;o__Peptostreptococcales;f__Peptostreptococcaceae;g__Clostridioides;s__Clostridioides difficile	25	0	4.29e-05
101523585	SRR14530881|k119_2547_flag=1_multi=49.0000_len=5946	Kitrinoviricota	d__Bacteria;p__Hydrogenedentota;c__Hydrogenedentia;o__Hydrogenedentiales;f__CAITNO01;g__JAAYJV01;s__JAAYJV01 sp002070275	33	1	9.54e-06
101523585	SRR11829105|k141_244462_flag=1_multi=21.0000_len=4982	Kitrinoviricota	d__Bacteria;p__Hydrogenedentota;c__Hydrogenedentia;o__Hydrogenedentiales;f__CAITNO01;g__JAAYJV01;s__JAAYJV01 sp002070275	29	1	9.54e-06
101523585	SRR11648176|k141_289439_flag=1_multi=9.0000_len=3612	Pisuviricota	d__Bacteria;p__Hydrogenedentota;c__Hydrogenedentia;o__Hydrogenedentiales;f__CAITNO01;g__JAAYJV01;s__JAAYJV01 sp002070275	27	1	0.000123
101523585	SRR7539306|k141_99293_flag=0_multi=371.0000_len=2608	Kitrinoviricota	d__Bacteria;p__Hydrogenedentota;c__Hydrogenedentia;o__Hydrogenedentiales;f__CAITNO01;g__JAAYJV01;s__JAAYJV01 sp002070275	24	0	0.000123
101525736	SRR11829331|k141_169482_flag=1_multi=17.0000_len=2431	Pisuviricota	d__Archaea;p__Thermoproteota;c__Thermoproteia;o__Sulfolobales;f__Desulfurococcaceae;g__EX4484-58;s__EX4484-58 sp002254665	26	1	0.00074
101528362	SRR10849743|k141_314187_flag=1_multi=10.0000_len=3273	Lenarviricota	d__Bacteria;p__Desulfobacterota_I;c__Desulfovibrionia;o__Desulfovibrionales;f__Desulfovibrionaceae;g__Desulfovibrio;s__Desulfovibrio faecigallinarum	23	0	0.000703
101533342	SRR11829261|k141_152797_flag=1_multi=151.2792_len=2526	Kitrinoviricota	d__Bacteria;p__Firmicutes_A;c__Clostridia;o__Peptostreptococcales;f__Peptostreptococcaceae;g__Clostridioides;s__Clostridioides difficile	25	0	4.29e-05
101538848	SRR11829261|k141_152797_flag=1_multi=151.2792_len=2526	Kitrinoviricota	d__Bacteria;p__Firmicutes_A;c__Clostridia;o__Peptostreptococcales;f__Peptostreptococcaceae;g__Clostridioides;s__Clostridioides difficile	25	0	4.29e-05
101542091	SRR11827439|k141_109350_flag=1_multi=4.0000_len=2497	Duplornaviricota	d__Bacteria;p__Firmicutes_A;c__Clostridia;o__Peptostreptococcales;f__Peptostreptococcaceae;g__Clostridioides;s__Clostridioides difficile	26	1	0.000481
101553937	SRR11828459|k141_18049_flag=1_multi=4.0000_len=1029	Duplornaviricota	d__Bacteria;p__Firmicutes_A;c__Clostridia;o__Peptostreptococcales;f__Peptostreptococcaceae;g__Clostridioides;s__Clostridioides difficile	29	1	1.11e-05
101565405	SRR11829261|k141_152797_flag=1_multi=151.2792_len=2526	Kitrinoviricota	d__Bacteria;p__Firmicutes_A;c__Clostridia;o__Peptostreptococcales;f__Peptostreptococcaceae;g__Clostridioides;s__Clostridioides difficile	25	0	4.29e-05
101565751	SRR11829144|k141_41746_flag=1_multi=10.0000_len=6681	Pisuviricota	d__Bacteria;p__Proteobacteria;c__Gammaproteobacteria;o__Enterobacterales;f__Enterobacteriaceae;g__Salmonella;s__Salmonella enterica	25	0	2.57e-05
101572198	SRR11648413|k141_155839_flag=0_multi=32.5524_len=1714	Lenarviricota	d__Bacteria;p__Proteobacteria;c__Gammaproteobacteria;o__Enterobacterales;f__Enterobacteriaceae;g__Salmonella;s__Salmonella enterica	23	0	0.000333
101575031	SRR11828459|k141_18049_flag=1_multi=4.0000_len=1029	Duplornaviricota	d__Bacteria;p__Firmicutes_A;c__Clostridia;o__Peptostreptococcales;f__Peptostreptococcaceae;g__Clostridioides;s__Clostridioides difficile	29	1	1.11e-05
101576015	SRR11648413|k141_155839_flag=0_multi=32.5524_len=1714	Lenarviricota	d__Bacteria;p__Proteobacteria;c__Gammaproteobacteria;o__Enterobacterales;f__Enterobacteriaceae;g__Salmonella;s__Salmonella enterica	23	0	0.000333
101578285	SRR11829261|k141_152797_flag=1_multi=151.2792_len=2526	Kitrinoviricota	d__Bacteria;p__Firmicutes_A;c__Clostridia;o__Peptostreptococcales;f__Peptostreptococcaceae;g__Clostridioides;s__Clostridioides difficile	25	0	4.29e-05
101593823	SRR11829261|k141_152797_flag=1_multi=151.2792_len=2526	Kitrinoviricota	d__Bacteria;p__Firmicutes_A;c__Clostridia;o__Peptostreptococcales;f__Peptostreptococcaceae;g__Clostridioides;s__Clostridioides difficile	25	0	4.29e-05
101595636	SRR7539006|k141_895006_flag=1_multi=5.0000_len=1941	Lenarviricota	d__Bacteria;p__Firmicutes;c__Bacilli;o__Lactobacillales;f__Listeriaceae;g__Listeria;s__Listeria monocytogenes	28	0	8.23e-05
101596588	SRR11829261|k141_152797_flag=1_multi=151.2792_len=2526	Kitrinoviricota	d__Bacteria;p__Firmicutes_A;c__Clostridia;o__Peptostreptococcales;f__Peptostreptococcaceae;g__Clostridioides;s__Clostridioides difficile	25	0	4.29e-05
101598408	SRR11648413|k141_155839_flag=0_multi=32.5524_len=1714	Lenarviricota	d__Bacteria;p__Proteobacteria;c__Gammaproteobacteria;o__Enterobacterales;f__Enterobacteriaceae;g__Salmonella;s__Salmonella enterica	23	0	0.000333
101603271	SRR11648413|k141_155839_flag=0_multi=32.5524_len=1714	Lenarviricota	d__Bacteria;p__Proteobacteria;c__Gammaproteobacteria;o__Enterobacterales;f__Enterobacteriaceae;g__Salmonella;s__Salmonella enterica	23	0	0.000333
101609495	SRR11829261|k141_152797_flag=1_multi=151.2792_len=2526	Kitrinoviricota	d__Bacteria;p__Firmicutes_A;c__Clostridia;o__Peptostreptococcales;f__Peptostreptococcaceae;g__Clostridioides;s__Clostridioides difficile	25	0	4.29e-05
101610246	SRR11828459|k141_18049_flag=1_multi=4.0000_len=1029	Duplornaviricota	d__Bacteria;p__Firmicutes_A;c__Clostridia;o__Peptostreptococcales;f__Peptostreptococcaceae;g__Clostridioides;s__Clostridioides difficile	29	1	1.11e-05
101612926	SRR11648413|k141_155839_flag=0_multi=32.5524_len=1714	Lenarviricota	d__Bacteria;p__Proteobacteria;c__Gammaproteobacteria;o__Enterobacterales;f__Enterobacteriaceae;g__Salmonella;s__Salmonella enterica	23	0	0.000333
101614278	SRR11829261|k141_152797_flag=1_multi=151.2792_len=2526	Kitrinoviricota	d__Bacteria;p__Firmicutes_A;c__Clostridia;o__Peptostreptococcales;f__Peptostreptococcaceae;g__Clostridioides;s__Clostridioides difficile	25	0	4.29e-05
101620430	SRR11829261|k141_152797_flag=1_multi=151.2792_len=2526	Kitrinoviricota	d__Bacteria;p__Firmicutes_A;c__Clostridia;o__Peptostreptococcales;f__Peptostreptococcaceae;g__Clostridioides;s__Clostridioides difficile	25	0	4.29e-05
101621882	SRR11829143|k141_198256_flag=1_multi=13.1560_len=8536	Pisuviricota	d__Bacteria;p__Firmicutes;c__Bacilli;o__Bacillales;f__Bacillaceae_G;g__Bacillus_A;s__Bacillus_A cytotoxicus	23	0	0.000296
101627623	SRR11828459|k141_18049_flag=1_multi=4.0000_len=1029	Duplornaviricota	d__Bacteria;p__Firmicutes_A;c__Clostridia;o__Peptostreptococcales;f__Peptostreptococcaceae;g__Clostridioides;s__Clostridioides difficile	29	1	1.11e-05
101639163	SRR11829261|k141_152797_flag=1_multi=151.2792_len=2526	Kitrinoviricota	d__Bacteria;p__Firmicutes_A;c__Clostridia;o__Peptostreptococcales;f__Peptostreptococcaceae;g__Clostridioides;s__Clostridioides difficile	25	0	4.29e-05
101639415	SRR11828806|k141_166307_flag=1_multi=10.0000_len=7065	Negarnaviricota	d__Bacteria;p__Firmicutes_A;c__Clostridia;o__Peptostreptococcales;f__Peptostreptococcaceae;g__Clostridioides;s__Clostridioides difficile	31	1	0.000154
101643389	SRR11828459|k141_18049_flag=1_multi=4.0000_len=1029	Duplornaviricota	d__Bacteria;p__Firmicutes_A;c__Clostridia;o__Peptostreptococcales;f__Peptostreptococcaceae;g__Clostridioides;s__Clostridioides difficile	29	1	1.11e-05
101647812	SRR11828459|k141_18049_flag=1_multi=4.0000_len=1029	Duplornaviricota	d__Bacteria;p__Firmicutes_A;c__Clostridia;o__Peptostreptococcales;f__Peptostreptococcaceae;g__Clostridioides;s__Clostridioides difficile	29	1	1.11e-05
101651271	SRR11648413|k141_155839_flag=0_multi=32.5524_len=1714	Lenarviricota	d__Bacteria;p__Proteobacteria;c__Gammaproteobacteria;o__Enterobacterales;f__Enterobacteriaceae;g__Salmonella;s__Salmonella enterica	23	0	0.000333
101653221	SRR11828459|k141_18049_flag=1_multi=4.0000_len=1029	Duplornaviricota	d__Bacteria;p__Firmicutes_A;c__Clostridia;o__Peptostreptococcales;f__Peptostreptococcaceae;g__Clostridioides;s__Clostridioides difficile	29	1	1.11e-05
101653574	SRR11827439|k141_109350_flag=1_multi=4.0000_len=2497	Duplornaviricota	d__Bacteria;p__Firmicutes_A;c__Clostridia;o__Peptostreptococcales;f__Peptostreptococcaceae;g__Clostridioides;s__Clostridioides difficile	26	1	0.000518
101656335	SRR11828459|k141_18049_flag=1_multi=4.0000_len=1029	Duplornaviricota	d__Bacteria;p__Firmicutes_A;c__Clostridia;o__Peptostreptococcales;f__Peptostreptococcaceae;g__Clostridioides;s__Clostridioides difficile	29	1	1.11e-05
101663919	SRR11828459|k141_18049_flag=1_multi=4.0000_len=1029	Duplornaviricota	d__Bacteria;p__Firmicutes_A;c__Clostridia;o__Peptostreptococcales;f__Peptostreptococcaceae;g__Clostridioides;s__Clostridioides difficile	29	1	1.11e-05
101666286	SRR11076227|k141_564324_flag=1_multi=26.0000_len=9102	Negarnaviricota	d__Bacteria;p__Firmicutes;c__Bacilli;o__Lactobacillales;f__Streptococcaceae;g__Streptococcus;s__Streptococcus agalactiae	27	1	9.26e-05
101675883	SRR11827439|k141_109350_flag=1_multi=4.0000_len=2497	Duplornaviricota	d__Bacteria;p__Firmicutes_A;c__Clostridia;o__Peptostreptococcales;f__Peptostreptococcaceae;g__Clostridioides;s__Clostridioides difficile	26	1	0.000518
101684421	SRR11648360|k141_127540_flag=1_multi=59.5060_len=9099	Pisuviricota	d__Bacteria;p__Spirochaetota;c__Spirochaetia;o__Treponematales;f__Treponemataceae;g__Treponema_D;s__Treponema_D pectinovorum	30	1	0.000296
101697460	SRR11622356|k141_291292_flag=1_multi=22.0000_len=7630	Pisuviricota	d__Bacteria;p__Proteobacteria;c__Gammaproteobacteria;o__Enterobacterales;f__Enterobacteriaceae;g__Salmonella;s__Salmonella enterica	25	0	2.57e-05
101701743	SRR11828459|k141_18049_flag=1_multi=4.0000_len=1029	Duplornaviricota	d__Bacteria;p__Firmicutes_A;c__Clostridia;o__Peptostreptococcales;f__Peptostreptococcaceae;g__Clostridioides;s__Clostridioides difficile	29	1	1.11e-05
101710889	SRR11828459|k141_18049_flag=1_multi=4.0000_len=1029	Duplornaviricota	d__Bacteria;p__Firmicutes_A;c__Clostridia;o__Peptostreptococcales;f__Peptostreptococcaceae;g__Clostridioides;s__Clostridioides difficile	29	1	1.11e-05
101711430	SRR11829261|k141_152797_flag=1_multi=151.2792_len=2526	Kitrinoviricota	d__Bacteria;p__Firmicutes_A;c__Clostridia;o__Peptostreptococcales;f__Peptostreptococcaceae;g__Clostridioides;s__Clostridioides difficile	25	0	4.29e-05
101713992	SRR11828459|k141_18049_flag=1_multi=4.0000_len=1029	Duplornaviricota	d__Bacteria;p__Firmicutes_A;c__Clostridia;o__Peptostreptococcales;f__Peptostreptococcaceae;g__Clostridioides;s__Clostridioides difficile	29	1	1.11e-05
101716673	BC-0302411580|k141_4922	Lenarviricota	d__Bacteria;p__Firmicutes_A;c__Clostridia;o__Clostridiales;f__Clostridiaceae;g__Clostridium_F;s__Clostridium_F sp001276215	26	1	0.000592
101717977	SRR11828459|k141_18049_flag=1_multi=4.0000_len=1029	Duplornaviricota	d__Bacteria;p__Firmicutes_A;c__Clostridia;o__Peptostreptococcales;f__Peptostreptococcaceae;g__Clostridioides;s__Clostridioides difficile	29	1	1.11e-05
101721407	SRR11827439|k141_109350_flag=1_multi=4.0000_len=2497	Duplornaviricota	d__Bacteria;p__Firmicutes_A;c__Clostridia;o__Peptostreptococcales;f__Peptostreptococcaceae;g__Clostridioides;s__Clostridioides difficile	26	1	0.000481
101733658	SRR11829261|k141_152797_flag=1_multi=151.2792_len=2526	Kitrinoviricota	d__Bacteria;p__Firmicutes_A;c__Clostridia;o__Peptostreptococcales;f__Peptostreptococcaceae;g__Clostridioides;s__Clostridioides difficile	25	0	4.29e-05
101734259	SRR11829101|k141_170810_flag=1_multi=15.0000_len=5608	Kitrinoviricota	d__Bacteria;p__Firmicutes_A;c__Clostridia;o__Peptostreptococcales;f__Peptostreptococcaceae;g__Clostridioides;s__Clostridioides difficile	30	0	1.11e-05
101740006	SRR11829261|k141_152797_flag=1_multi=151.2792_len=2526	Kitrinoviricota	d__Bacteria;p__Firmicutes_A;c__Clostridia;o__Peptostreptococcales;f__Peptostreptococcaceae;g__Clostridioides;s__Clostridioides difficile	25	0	4.29e-05
101740723	SRR11648162|k141_35134_flag=1_multi=3.0000_len=1062	Lenarviricota	d__Bacteria;p__Proteobacteria;c__Gammaproteobacteria;o__Enterobacterales;f__Enterobacteriaceae;g__Pectobacterium;s__Pectobacterium carotovorum	30	1	0.000333
101744337	SRR11648413|k141_155839_flag=0_multi=32.5524_len=1714	Lenarviricota	d__Bacteria;p__Proteobacteria;c__Gammaproteobacteria;o__Enterobacterales;f__Enterobacteriaceae;g__Salmonella;s__Salmonella enterica	23	0	0.000333
101748021	BC-0345312359|k141_67751	Duplornaviricota	d__Bacteria;p__Campylobacterota;c__Campylobacteria;o__Campylobacterales;f__Campylobacteraceae;g__Campylobacter_D;s__Campylobacter_D jejuni	23	0	0.000259
101750127	SRR11829261|k141_152797_flag=1_multi=151.2792_len=2526	Kitrinoviricota	d__Bacteria;p__Firmicutes_A;c__Clostridia;o__Peptostreptococcales;f__Peptostreptococcaceae;g__Clostridioides;s__Clostridioides difficile	25	0	4.29e-05
101753182	SRR11829261|k141_152797_flag=1_multi=151.2792_len=2526	Kitrinoviricota	d__Bacteria;p__Firmicutes_A;c__Clostridia;o__Peptostreptococcales;f__Peptostreptococcaceae;g__Clostridioides;s__Clostridioides difficile	25	0	4.29e-05
101760173	SRR7551019|k141_322358_flag=1_multi=132.0000_len=5586	Unclassified	d__Bacteria;p__Acidobacteriota;c__Holophagae;o__Holophagales;f__Holophagaceae;g__JAFDVN01;s__JAFDVN01 sp018269025	29	1	3.1e-05
101760769	SRR11829261|k141_152797_flag=1_multi=151.2792_len=2526	Kitrinoviricota	d__Bacteria;p__Firmicutes_A;c__Clostridia;o__Peptostreptococcales;f__Peptostreptococcaceae;g__Clostridioides;s__Clostridioides difficile	25	0	4.29e-05
101762519	SRR11828459|k141_18049_flag=1_multi=4.0000_len=1029	Duplornaviricota	d__Bacteria;p__Firmicutes_A;c__Clostridia;o__Peptostreptococcales;f__Peptostreptococcaceae;g__Clostridioides;s__Clostridioides difficile	29	1	1.11e-05
101767453	SRR11828459|k141_18049_flag=1_multi=4.0000_len=1029	Duplornaviricota	d__Bacteria;p__Firmicutes_A;c__Clostridia;o__Peptostreptococcales;f__Peptostreptococcaceae;g__Clostridioides;s__Clostridioides difficile	29	1	1.11e-05
101771318	SRR11828459|k141_18049_flag=1_multi=4.0000_len=1029	Duplornaviricota	d__Bacteria;p__Firmicutes_A;c__Clostridia;o__Peptostreptococcales;f__Peptostreptococcaceae;g__Clostridioides;s__Clostridioides difficile	29	1	1.11e-05
101775159	SRR11076227|k141_564324_flag=1_multi=26.0000_len=9102	Negarnaviricota	d__Bacteria;p__Firmicutes;c__Bacilli;o__Lactobacillales;f__Streptococcaceae;g__Streptococcus;s__Streptococcus agalactiae	27	1	9.26e-05
101777367	SRR11828459|k141_18049_flag=1_multi=4.0000_len=1029	Duplornaviricota	d__Bacteria;p__Firmicutes_A;c__Clostridia;o__Peptostreptococcales;f__Peptostreptococcaceae;g__Clostridioides;s__Clostridioides difficile	29	1	1.11e-05
101778627	SRR12685052|k141_32900_flag=1_multi=7.8795_len=3219	Unclassified	d__Bacteria;p__Firmicutes;c__Bacilli;o__Erysipelotrichales;f__Erysipelotrichaceae;g__Floccifex;s__Floccifex porci	26	1	0.000333
101778982	SRR11828459|k141_18049_flag=1_multi=4.0000_len=1029	Duplornaviricota	d__Bacteria;p__Firmicutes_A;c__Clostridia;o__Peptostreptococcales;f__Peptostreptococcaceae;g__Clostridioides;s__Clostridioides difficile	29	1	1.11e-05
101780905	SRR11827439|k141_109350_flag=1_multi=4.0000_len=2497	Duplornaviricota	d__Bacteria;p__Firmicutes_A;c__Clostridia;o__Peptostreptococcales;f__Peptostreptococcaceae;g__Clostridioides;s__Clostridioides difficile	26	1	0.000481
101782767	SRR11827439|k141_109350_flag=1_multi=4.0000_len=2497	Duplornaviricota	d__Bacteria;p__Firmicutes_A;c__Clostridia;o__Peptostreptococcales;f__Peptostreptococcaceae;g__Clostridioides;s__Clostridioides difficile	26	1	0.000481
101791355	SRR11076227|k141_564324_flag=1_multi=26.0000_len=9102	Negarnaviricota	d__Bacteria;p__Firmicutes;c__Bacilli;o__Lactobacillales;f__Streptococcaceae;g__Streptococcus;s__Streptococcus agalactiae	27	1	9.26e-05
101793022	SRR11827439|k141_109350_flag=1_multi=4.0000_len=2497	Duplornaviricota	d__Bacteria;p__Firmicutes_A;c__Clostridia;o__Peptostreptococcales;f__Peptostreptococcaceae;g__Clostridioides;s__Clostridioides difficile	26	1	0.000518
101798253	SRR11648413|k141_155839_flag=0_multi=32.5524_len=1714	Lenarviricota	d__Bacteria;p__Proteobacteria;c__Gammaproteobacteria;o__Enterobacterales;f__Enterobacteriaceae;g__Salmonella;s__Salmonella enterica	23	0	0.000333
101808153	SRR11829261|k141_152797_flag=1_multi=151.2792_len=2526	Kitrinoviricota	d__Bacteria;p__Firmicutes_A;c__Clostridia;o__Peptostreptococcales;f__Peptostreptococcaceae;g__Clostridioides;s__Clostridioides difficile	25	0	4.29e-05
101818979	SRR11827439|k141_109350_flag=1_multi=4.0000_len=2497	Duplornaviricota	d__Bacteria;p__Firmicutes_A;c__Clostridia;o__Peptostreptococcales;f__Peptostreptococcaceae;g__Clostridioides;s__Clostridioides difficile	26	1	0.000481
101826179	SRR11450585|k141_271606_flag=1_multi=19.0000_len=7346	Pisuviricota	d__Bacteria;p__Bacteroidota;c__Bacteroidia;o__Cytophagales;f__Spirosomaceae;g__Flectobacillus;s__Flectobacillus sp009905545	26	1	0.000481
101828281	SRR11076227|k141_564324_flag=1_multi=26.0000_len=9102	Negarnaviricota	d__Bacteria;p__Firmicutes;c__Bacilli;o__Lactobacillales;f__Streptococcaceae;g__Streptococcus;s__Streptococcus agalactiae	27	1	9.26e-05
101842079	SRR7535304|k141_100715_flag=1_multi=12.0000_len=3154	Lenarviricota	d__Bacteria;p__Firmicutes_A;c__Clostridia;o__Lachnospirales;f__Lachnospiraceae;g__Oliverpabstia;s__Oliverpabstia sp004556655	23	0	0.000444
101856641	SRR11828459|k141_18049_flag=1_multi=4.0000_len=1029	Duplornaviricota	d__Bacteria;p__Firmicutes_A;c__Clostridia;o__Peptostreptococcales;f__Peptostreptococcaceae;g__Clostridioides;s__Clostridioides difficile	29	1	1.11e-05
101872774	BC-0345297432|k141_95601	Kitrinoviricota	d__Bacteria;p__Cyanobacteria;c__Cyanobacteriia;o__PCC-6307;f__Cyanobiaceae;g__Synechococcus_E;s__Synechococcus_E sp000195975	28	1	4e-05
101890089	SRR11648413|k141_155839_flag=0_multi=32.5524_len=1714	Lenarviricota	d__Bacteria;p__Proteobacteria;c__Gammaproteobacteria;o__Enterobacterales;f__Enterobacteriaceae;g__Salmonella;s__Salmonella enterica	23	0	0.000333
101894509	SRR11076227|k141_564324_flag=1_multi=26.0000_len=9102	Negarnaviricota	d__Bacteria;p__Firmicutes;c__Bacilli;o__Lactobacillales;f__Streptococcaceae;g__Streptococcus;s__Streptococcus agalactiae	27	1	9.26e-05
101894529	SRR11828898|k141_99401_flag=1_multi=7.0000_len=4464	Negarnaviricota	d__Bacteria;p__Firmicutes_A;c__Clostridia;o__Clostridiales;f__Clostridiaceae;g__Clostridium_B;s__Clostridium_B ljungdahlii	32	1	3.43e-05
101897505	SRR11828459|k141_18049_flag=1_multi=4.0000_len=1029	Duplornaviricota	d__Bacteria;p__Firmicutes_A;c__Clostridia;o__Peptostreptococcales;f__Peptostreptococcaceae;g__Clostridioides;s__Clostridioides difficile	29	1	1.11e-05
101899478	SRR11829261|k141_127994_flag=1_multi=9.0000_len=2328	Pisuviricota	d__Bacteria;p__Firmicutes_A;c__Clostridia;o__Lachnospirales;f__Lachnospiraceae;g__Eisenbergiella;s__Eisenbergiella tayi	26	1	0.000518
101907269	SRR11829261|k141_152797_flag=1_multi=151.2792_len=2526	Kitrinoviricota	d__Bacteria;p__Firmicutes_A;c__Clostridia;o__Peptostreptococcales;f__Peptostreptococcaceae;g__Clostridioides;s__Clostridioides difficile	25	0	4.29e-05
101914043	SRR11648413|k141_155839_flag=0_multi=32.5524_len=1714	Lenarviricota	d__Bacteria;p__Proteobacteria;c__Gammaproteobacteria;o__Enterobacterales;f__Enterobacteriaceae;g__Salmonella;s__Salmonella enterica	23	0	0.000333
101914583	BC-0345273217|k141_606	Lenarviricota	d__Bacteria;p__Proteobacteria;c__Gammaproteobacteria;o__Pseudomonadales;f__Pseudomonadaceae;g__Pseudomonas;s__Pseudomonas aeruginosa	35	1	1.29e-06
101914583	SRR12685024|k141_131206_flag=1_multi=12.0000_len=3956	Pisuviricota	d__Bacteria;p__Proteobacteria;c__Gammaproteobacteria;o__Pseudomonadales;f__Pseudomonadaceae;g__Pseudomonas;s__Pseudomonas aeruginosa	23	0	0.000777
101914584	SRR14530884|k119_1341_flag=1_multi=17.0000_len=3007	Kitrinoviricota	d__Bacteria;p__Proteobacteria;c__Gammaproteobacteria;o__Pseudomonadales;f__Pseudomonadaceae;g__Pseudomonas;s__Pseudomonas aeruginosa	23	0	0.00074
101915533	SRR11828459|k141_18049_flag=1_multi=4.0000_len=1029	Duplornaviricota	d__Bacteria;p__Firmicutes_A;c__Clostridia;o__Peptostreptococcales;f__Peptostreptococcaceae;g__Clostridioides;s__Clostridioides difficile	29	1	1.11e-05
101923407	SRR11648413|k141_155839_flag=0_multi=32.5524_len=1714	Lenarviricota	d__Bacteria;p__Proteobacteria;c__Gammaproteobacteria;o__Enterobacterales;f__Enterobacteriaceae;g__Salmonella;s__Salmonella enterica	23	0	0.000333
101923690	SRR11828459|k141_18049_flag=1_multi=4.0000_len=1029	Duplornaviricota	d__Bacteria;p__Firmicutes_A;c__Clostridia;o__Peptostreptococcales;f__Peptostreptococcaceae;g__Clostridioides;s__Clostridioides difficile	29	1	1.11e-05
101925078	SRR7590083|k141_217_flag=1_multi=6.0000_len=1969	Pisuviricota	d__Bacteria;p__Proteobacteria;c__Gammaproteobacteria;o__Enterobacterales_A;f__Enterobacteriaceae_A;g__;s__	31	0	0.000165
101925807	SRR11828459|k141_18049_flag=1_multi=4.0000_len=1029	Duplornaviricota	d__Bacteria;p__Firmicutes_A;c__Clostridia;o__Peptostreptococcales;f__Peptostreptococcaceae;g__Clostridioides;s__Clostridioides difficile	29	1	1.11e-05
101927354	SRR11829261|k141_152797_flag=1_multi=151.2792_len=2526	Kitrinoviricota	d__Bacteria;p__Firmicutes_A;c__Clostridia;o__Peptostreptococcales;f__Peptostreptococcaceae;g__Clostridioides;s__Clostridioides difficile	25	0	4.29e-05
101929646	SRR11829261|k141_152797_flag=1_multi=151.2792_len=2526	Kitrinoviricota	d__Bacteria;p__Firmicutes_A;c__Clostridia;o__Peptostreptococcales;f__Peptostreptococcaceae;g__Clostridioides;s__Clostridioides difficile	25	0	4.29e-05
101929766	SRR17509979|k141_53443_flag=1_multi=169.8080_len=4630	Kitrinoviricota	d__Bacteria;p__Chloroflexota;c__Dehalococcoidia;o__Tepidiformales;f__Tepidiformaceae;g__FeB-14;s__FeB-14 sp016719395	28	1	3.15e-05
101929766	SRR17497068|k141_144847_flag=1_multi=37.7881_len=1816	Pisuviricota	d__Bacteria;p__Chloroflexota;c__Dehalococcoidia;o__Tepidiformales;f__Tepidiformaceae;g__FeB-14;s__FeB-14 sp016719395	28	1	3.15e-05
101929766	SRR17509979|k141_54497_flag=1_multi=434.0000_len=1853	Pisuviricota	d__Bacteria;p__Chloroflexota;c__Dehalococcoidia;o__Tepidiformales;f__Tepidiformaceae;g__FeB-14;s__FeB-14 sp016719395	28	1	3.15e-05
101929766	SRR17509978|k141_111246_flag=1_multi=25.3407_len=1855	Pisuviricota	d__Bacteria;p__Chloroflexota;c__Dehalococcoidia;o__Tepidiformales;f__Tepidiformaceae;g__FeB-14;s__FeB-14 sp016719395	28	1	3.15e-05
101929766	SRR17497064|k141_135790_flag=1_multi=52.0000_len=1739	Pisuviricota	d__Bacteria;p__Chloroflexota;c__Dehalococcoidia;o__Tepidiformales;f__Tepidiformaceae;g__FeB-14;s__FeB-14 sp016719395	28	1	3.15e-05
101929766	SRR17497092|k141_33398_flag=1_multi=217.0121_len=1878	Pisuviricota	d__Bacteria;p__Chloroflexota;c__Dehalococcoidia;o__Tepidiformales;f__Tepidiformaceae;g__FeB-14;s__FeB-14 sp016719395	28	1	3.15e-05
101929766	SRR17509979|k141_52575_flag=1_multi=83.6741_len=1804	Pisuviricota	d__Bacteria;p__Chloroflexota;c__Dehalococcoidia;o__Tepidiformales;f__Tepidiformaceae;g__FeB-14;s__FeB-14 sp016719395	28	1	3.15e-05
101929766	SRR11829331|k141_332492_flag=1_multi=252.0000_len=4351	Lenarviricota	d__Bacteria;p__Chloroflexota;c__Dehalococcoidia;o__Tepidiformales;f__Tepidiformaceae;g__FeB-14;s__FeB-14 sp016719395	28	1	3.15e-05
101929766	SRR17481242|k141_14860_flag=1_multi=140.0000_len=3974	Unclassified	d__Bacteria;p__Chloroflexota;c__Dehalococcoidia;o__Tepidiformales;f__Tepidiformaceae;g__FeB-14;s__FeB-14 sp016719395	28	1	3.15e-05
101929766	BC-0332570062|k141_61782	Lenarviricota	d__Bacteria;p__Chloroflexota;c__Dehalococcoidia;o__Tepidiformales;f__Tepidiformaceae;g__FeB-14;s__FeB-14 sp016719395	28	1	3.15e-05
101929766	SRR11828805|k141_11533_flag=1_multi=89.8329_len=3648	Kitrinoviricota	d__Bacteria;p__Chloroflexota;c__Dehalococcoidia;o__Tepidiformales;f__Tepidiformaceae;g__FeB-14;s__FeB-14 sp016719395	29	0	1.88e-07
101929766	SRR17509979|k141_62709_flag=1_multi=44.0000_len=2751	Pisuviricota	d__Bacteria;p__Chloroflexota;c__Dehalococcoidia;o__Tepidiformales;f__Tepidiformaceae;g__FeB-14;s__FeB-14 sp016719395	28	0	0.000113
101929766	SRR17509977|k141_51278_flag=1_multi=666.0000_len=6190	Pisuviricota	d__Bacteria;p__Chloroflexota;c__Dehalococcoidia;o__Tepidiformales;f__Tepidiformaceae;g__FeB-14;s__FeB-14 sp016719395	28	1	3.15e-05
101929766	SRR10849374|k141_218357_flag=1_multi=12.0000_len=3750	Lenarviricota	d__Bacteria;p__Chloroflexota;c__Dehalococcoidia;o__Tepidiformales;f__Tepidiformaceae;g__FeB-14;s__FeB-14 sp016719395	28	1	3.15e-05
101929766	SRR18771403|k141_131354_flag=1_multi=48.8407_len=10690	Pisuviricota	d__Bacteria;p__Chloroflexota;c__Dehalococcoidia;o__Tepidiformales;f__Tepidiformaceae;g__FeB-14;s__FeB-14 sp016719395	28	1	3.15e-05
101929766	SRR17509979|k141_28799_flag=1_multi=182.0000_len=1917	Pisuviricota	d__Bacteria;p__Chloroflexota;c__Dehalococcoidia;o__Tepidiformales;f__Tepidiformaceae;g__FeB-14;s__FeB-14 sp016719395	28	1	3.15e-05
101929766	BC-0345298860|k141_3179	Lenarviricota	d__Bacteria;p__Chloroflexota;c__Dehalococcoidia;o__Tepidiformales;f__Tepidiformaceae;g__FeB-14;s__FeB-14 sp016719395	28	1	3.15e-05
101929766	SRR11648176|k141_298601_flag=1_multi=36.0000_len=3120	Kitrinoviricota	d__Bacteria;p__Chloroflexota;c__Dehalococcoidia;o__Tepidiformales;f__Tepidiformaceae;g__FeB-14;s__FeB-14 sp016719395	29	1	8.75e-06
101929766	SRR14530880|k119_2620_flag=1_multi=62.0000_len=4380	Kitrinoviricota	d__Bacteria;p__Chloroflexota;c__Dehalococcoidia;o__Tepidiformales;f__Tepidiformaceae;g__FeB-14;s__FeB-14 sp016719395	29	1	8.75e-06
101929766	SRR17497054|k141_191824_flag=1_multi=13.0000_len=2259	Pisuviricota	d__Bacteria;p__Chloroflexota;c__Dehalococcoidia;o__Tepidiformales;f__Tepidiformaceae;g__FeB-14;s__FeB-14 sp016719395	28	1	3.15e-05
101929766	SRR17481244|k141_92016_flag=1_multi=44.0000_len=3519	Lenarviricota	d__Bacteria;p__Chloroflexota;c__Dehalococcoidia;o__Tepidiformales;f__Tepidiformaceae;g__FeB-14;s__FeB-14 sp016719395	28	1	3.15e-05
101929766	SRR17497104|k141_42863_flag=1_multi=4.0000_len=1013	Lenarviricota	d__Bacteria;p__Chloroflexota;c__Dehalococcoidia;o__Tepidiformales;f__Tepidiformaceae;g__FeB-14;s__FeB-14 sp016719395	24	0	0.000113
101929766	SRR17497098|k141_13697_flag=1_multi=34.0000_len=1851	Pisuviricota	d__Bacteria;p__Chloroflexota;c__Dehalococcoidia;o__Tepidiformales;f__Tepidiformaceae;g__FeB-14;s__FeB-14 sp016719395	28	1	3.15e-05
101929766	SRR11648360|k141_236875_flag=1_multi=13.0000_len=4864	urv.p.001	d__Bacteria;p__Chloroflexota;c__Dehalococcoidia;o__Tepidiformales;f__Tepidiformaceae;g__FeB-14;s__FeB-14 sp016719395	29	1	8.75e-06
101929766	SRR17509940|k141_117101_flag=1_multi=38.0000_len=2457	Duplornaviricota	d__Bacteria;p__Chloroflexota;c__Dehalococcoidia;o__Tepidiformales;f__Tepidiformaceae;g__FeB-14;s__FeB-14 sp016719395	28	0	0.000113
101929766	SRR10849744|k141_310535_flag=1_multi=101.0000_len=3955	Lenarviricota	d__Bacteria;p__Chloroflexota;c__Dehalococcoidia;o__Tepidiformales;f__Tepidiformaceae;g__FeB-14;s__FeB-14 sp016719395	29	1	8.75e-06
101929766	SRR17509967|k141_44924_flag=1_multi=7.0000_len=2320	Pisuviricota	d__Bacteria;p__Chloroflexota;c__Dehalococcoidia;o__Tepidiformales;f__Tepidiformaceae;g__FeB-14;s__FeB-14 sp016719395	27	0	0.000407
101929766	SRR11450579|k141_22903_flag=1_multi=93.0000_len=8250	Pisuviricota	d__Bacteria;p__Chloroflexota;c__Dehalococcoidia;o__Tepidiformales;f__Tepidiformaceae;g__FeB-14;s__FeB-14 sp016719395	28	0	0.000113
101929766	SRR17509976|k141_100049_flag=1_multi=72.0000_len=1862	Pisuviricota	d__Bacteria;p__Chloroflexota;c__Dehalococcoidia;o__Tepidiformales;f__Tepidiformaceae;g__FeB-14;s__FeB-14 sp016719395	27	1	0.000113
101929766	SRR17509976|k141_164083_flag=1_multi=58.0000_len=4337	Pisuviricota	d__Bacteria;p__Chloroflexota;c__Dehalococcoidia;o__Tepidiformales;f__Tepidiformaceae;g__FeB-14;s__FeB-14 sp016719395	28	0	0.000113
101929766	SRR11450585|k141_260925_flag=1_multi=20.0000_len=6420	Unclassified	d__Bacteria;p__Chloroflexota;c__Dehalococcoidia;o__Tepidiformales;f__Tepidiformaceae;g__FeB-14;s__FeB-14 sp016719395	28	1	3.15e-05
101929766	SRR17509979|k141_40329_flag=1_multi=17.0000_len=1013	Pisuviricota	d__Bacteria;p__Chloroflexota;c__Dehalococcoidia;o__Tepidiformales;f__Tepidiformaceae;g__FeB-14;s__FeB-14 sp016719395	29	1	8.75e-06
101929766	SRR17509977|k141_156580_flag=1_multi=3.0000_len=1406	Pisuviricota	d__Bacteria;p__Chloroflexota;c__Dehalococcoidia;o__Tepidiformales;f__Tepidiformaceae;g__FeB-14;s__FeB-14 sp016719395	24	0	0.000113
101934031	SRR8549483|k141_37596_flag=1_multi=8.0000_len=3309	Pisuviricota	d__Bacteria;p__Actinobacteriota;c__Actinomycetia;o__Mycobacteriales;f__Mycobacteriaceae;g__Corynebacterium;s__Corynebacterium striatum	26	1	0.00037
101948000	SRR11076227|k141_564324_flag=1_multi=26.0000_len=9102	Negarnaviricota	d__Bacteria;p__Firmicutes;c__Bacilli;o__Lactobacillales;f__Streptococcaceae;g__Streptococcus;s__Streptococcus agalactiae	27	1	9.26e-05
101948289	SRR11828459|k141_18049_flag=1_multi=4.0000_len=1029	Duplornaviricota	d__Bacteria;p__Firmicutes_A;c__Clostridia;o__Peptostreptococcales;f__Peptostreptococcaceae;g__Clostridioides;s__Clostridioides difficile	29	1	1.11e-05
101952264	SRR11828459|k141_18049_flag=1_multi=4.0000_len=1029	Duplornaviricota	d__Bacteria;p__Firmicutes_A;c__Clostridia;o__Peptostreptococcales;f__Peptostreptococcaceae;g__Clostridioides;s__Clostridioides difficile	29	1	1.11e-05
101952475	SRR11648413|k141_155839_flag=0_multi=32.5524_len=1714	Lenarviricota	d__Bacteria;p__Proteobacteria;c__Gammaproteobacteria;o__Enterobacterales;f__Enterobacteriaceae;g__Salmonella;s__Salmonella enterica	23	0	0.000333
101956601	SRR11648413|k141_155839_flag=0_multi=32.5524_len=1714	Lenarviricota	d__Bacteria;p__Proteobacteria;c__Gammaproteobacteria;o__Enterobacterales;f__Enterobacteriaceae;g__Salmonella;s__Salmonella enterica	23	0	0.000296
101975071	SRR11828459|k141_18049_flag=1_multi=4.0000_len=1029	Duplornaviricota	d__Bacteria;p__Firmicutes_A;c__Clostridia;o__Peptostreptococcales;f__Peptostreptococcaceae;g__Clostridioides;s__Clostridioides difficile	29	1	1.11e-05
101980440	SRR11828459|k141_18049_flag=1_multi=4.0000_len=1029	Duplornaviricota	d__Bacteria;p__Firmicutes_A;c__Clostridia;o__Peptostreptococcales;f__Peptostreptococcaceae;g__Clostridioides;s__Clostridioides difficile	29	1	1.11e-05
101984326	SRR7535304|k141_765696_flag=1_multi=6.0000_len=1555	Pisuviricota	d__Bacteria;p__Cyanobacteria;c__Cyanobacteriia;o__Pseudanabaenales;f__Pseudanabaenaceae;g__Pseudanabaena;s__	27	0	0.000666
101984412	SRR7535304|k141_765696_flag=1_multi=6.0000_len=1555	Pisuviricota	d__Bacteria;p__Cyanobacteria;c__Cyanobacteriia;o__Pseudanabaenales;f__Pseudanabaenaceae;g__Pseudanabaena;s__	27	0	0.000666
101985226	SRR5829936|k141_107673_flag=1_multi=8.0000_len=5184	Negarnaviricota	d__Bacteria;p__Planctomycetota;c__Phycisphaerae;o__Sedimentisphaerales;f__Sedimentisphaeraceae;g__Sedimentisphaera;s__Sedimentisphaera salicampi	25	1	0.000666
102004255	SRR11828459|k141_18049_flag=1_multi=4.0000_len=1029	Duplornaviricota	d__Bacteria;p__Firmicutes_A;c__Clostridia;o__Peptostreptococcales;f__Peptostreptococcaceae;g__Clostridioides;s__Clostridioides difficile	29	1	1.11e-05
102009104	SRR11829261|k141_152797_flag=1_multi=151.2792_len=2526	Kitrinoviricota	d__Bacteria;p__Firmicutes_A;c__Clostridia;o__Peptostreptococcales;f__Peptostreptococcaceae;g__Clostridioides;s__Clostridioides difficile	25	0	4.29e-05
102009846	SRR11828806|k141_166307_flag=1_multi=10.0000_len=7065	Negarnaviricota	d__Bacteria;p__Firmicutes_A;c__Clostridia;o__Peptostreptococcales;f__Peptostreptococcaceae;g__Clostridioides;s__Clostridioides difficile	31	1	0.000154
102021203	SRR11828459|k141_18049_flag=1_multi=4.0000_len=1029	Duplornaviricota	d__Bacteria;p__Firmicutes_A;c__Clostridia;o__Peptostreptococcales;f__Peptostreptococcaceae;g__Clostridioides;s__Clostridioides difficile	29	1	1.11e-05
102025125	SRR17481214|k141_406448_flag=1_multi=2294.7860_len=4383	Lenarviricota	d__Archaea;p__Altiarchaeota;c__Altiarchaeia;o__Altiarchaeales;f__Altiarchaeaceae;g__Altiarchaeum;s__Altiarchaeum sp018260755	31	1	1.05e-06
102025125	SRR11450580|k141_109913_flag=1_multi=102.0000_len=6558	Pisuviricota	d__Archaea;p__Altiarchaeota;c__Altiarchaeia;o__Altiarchaeales;f__Altiarchaeaceae;g__Altiarchaeum;s__Altiarchaeum sp018260755	36	1	1.35e-05
102025125	SRR11648360|k141_238775_flag=1_multi=340.0000_len=9219	Pisuviricota	d__Archaea;p__Altiarchaeota;c__Altiarchaeia;o__Altiarchaeales;f__Altiarchaeaceae;g__Altiarchaeum;s__Altiarchaeum sp018260755	35	1	1.05e-06
102025125	SRR11829261|k141_110359_flag=1_multi=8.0000_len=3116	Duplornaviricota	d__Archaea;p__Altiarchaeota;c__Altiarchaeia;o__Altiarchaeales;f__Altiarchaeaceae;g__Altiarchaeum;s__Altiarchaeum sp018260755	28	0	0.000175
102032140	SRR14530856|k119_831_flag=1_multi=6.8977_len=2171	Pisuviricota	d__Bacteria;p__Proteobacteria;c__Alphaproteobacteria;o__Rhizobiales_A;f__Rhizobiaceae_A;g__Bartonella;s__Bartonella krasnovii	29	1	3.42e-05
102032140	SRR17509965|k141_3633_flag=1_multi=76.0000_len=1331	Lenarviricota	d__Bacteria;p__Proteobacteria;c__Alphaproteobacteria;o__Rhizobiales_A;f__Rhizobiaceae_A;g__Bartonella;s__Bartonella krasnovii	36	1	4.39e-09
102032140	SRR17509965|k141_7443_flag=1_multi=17.0000_len=2776	Lenarviricota	d__Bacteria;p__Proteobacteria;c__Alphaproteobacteria;o__Rhizobiales_A;f__Rhizobiaceae_A;g__Bartonella;s__Bartonella krasnovii	27	1	0.000442
102032140	SRR14530856|k119_1113_flag=1_multi=6.4363_len=1061	Lenarviricota	d__Bacteria;p__Proteobacteria;c__Alphaproteobacteria;o__Rhizobiales_A;f__Rhizobiaceae_A;g__Bartonella;s__Bartonella krasnovii	28	1	0.000123
102032140	SRR14530851|k119_3370_flag=1_multi=3.0000_len=1601	Kitrinoviricota	d__Bacteria;p__Proteobacteria;c__Alphaproteobacteria;o__Rhizobiales_A;f__Rhizobiaceae_A;g__Bartonella;s__Bartonella krasnovii	27	1	0.000442
102032140	SRR14530851|k119_3703_flag=1_multi=15.0000_len=2239	Lenarviricota	d__Bacteria;p__Proteobacteria;c__Alphaproteobacteria;o__Rhizobiales_A;f__Rhizobiaceae_A;g__Bartonella;s__Bartonella krasnovii	27	1	0.000442
102032140	SRR14530886|k119_680_flag=1_multi=100.0000_len=3978	Lenarviricota	d__Bacteria;p__Proteobacteria;c__Alphaproteobacteria;o__Rhizobiales_A;f__Rhizobiaceae_A;g__Bartonella;s__Bartonella krasnovii	28	1	0.000123
102032140	SRR14530890|k119_6242_flag=1_multi=48.0000_len=9234	Pisuviricota	d__Bacteria;p__Proteobacteria;c__Alphaproteobacteria;o__Rhizobiales_A;f__Rhizobiaceae_A;g__Bartonella;s__Bartonella krasnovii	29	1	3.42e-05
102032140	SRR14530851|k119_974_flag=1_multi=81.0000_len=4033	Lenarviricota	d__Bacteria;p__Proteobacteria;c__Alphaproteobacteria;o__Rhizobiales_A;f__Rhizobiaceae_A;g__Bartonella;s__Bartonella krasnovii	29	1	3.42e-05
102032140	SRR17509965|k141_3566_flag=1_multi=10384.7568_len=1769	Lenarviricota	d__Bacteria;p__Proteobacteria;c__Alphaproteobacteria;o__Rhizobiales_A;f__Rhizobiaceae_A;g__Bartonella;s__Bartonella krasnovii	37	1	2.04e-07
102032140	SRR14530784|k141_4017_flag=1_multi=57.0000_len=5894	Kitrinoviricota	d__Bacteria;p__Proteobacteria;c__Alphaproteobacteria;o__Rhizobiales_A;f__Rhizobiaceae_A;g__Bartonella;s__Bartonella krasnovii	34	1	5.68e-08
102032140	SRR14530852|k119_2832_flag=1_multi=18.0000_len=5122	Kitrinoviricota	d__Bacteria;p__Proteobacteria;c__Alphaproteobacteria;o__Rhizobiales_A;f__Rhizobiaceae_A;g__Bartonella;s__Bartonella krasnovii	29	1	3.42e-05
102032140	SRR14530865|k119_726_flag=1_multi=8.4651_len=2140	Lenarviricota	d__Bacteria;p__Proteobacteria;c__Alphaproteobacteria;o__Rhizobiales_A;f__Rhizobiaceae_A;g__Bartonella;s__Bartonella krasnovii	29	1	3.42e-05
102032605	SRR14530885|k119_6154_flag=1_multi=5.0000_len=1077	Kitrinoviricota	d__Bacteria;p__Proteobacteria;c__Gammaproteobacteria;o__Cardiobacteriales;f__Cardiobacteriaceae;g__Rappaport;s__	26	1	0.000333
102037432	SRR11829261|k141_152797_flag=1_multi=151.2792_len=2526	Kitrinoviricota	d__Bacteria;p__Firmicutes_A;c__Clostridia;o__Peptostreptococcales;f__Peptostreptococcaceae;g__Clostridioides;s__Clostridioides difficile	25	0	4.29e-05
102042348	SRR11828459|k141_18049_flag=1_multi=4.0000_len=1029	Duplornaviricota	d__Bacteria;p__Firmicutes_A;c__Clostridia;o__Peptostreptococcales;f__Peptostreptococcaceae;g__Clostridioides;s__Clostridioides difficile	29	1	1.11e-05
102049890	SRR11829261|k141_152797_flag=1_multi=151.2792_len=2526	Kitrinoviricota	d__Bacteria;p__Firmicutes_A;c__Clostridia;o__Peptostreptococcales;f__Peptostreptococcaceae;g__Clostridioides;s__Clostridioides difficile	25	0	4.29e-05
102051424	SRR7535022|k141_91608_flag=1_multi=9.0000_len=5495	Kitrinoviricota	d__Bacteria;p__Bacteroidota;c__Bacteroidia;o__Chitinophagales;f__Saprospiraceae;g__Lewinella_A;s__Lewinella_A aurantiaca	25	0	3.15e-05
102052126	SRR17509940|k141_117101_flag=1_multi=38.0000_len=2457	Duplornaviricota	d__Bacteria;p__Acidobacteriota;c__Thermoanaerobaculia;o__UBA5066;f__UBA5066;g__UBA5066;s__UBA5066 sp016714815	27	0	1.24e-05
102052126	SRR17497126|k141_68629_flag=1_multi=6.0000_len=1048	Pisuviricota	d__Bacteria;p__Acidobacteriota;c__Thermoanaerobaculia;o__UBA5066;f__UBA5066;g__UBA5066;s__UBA5066 sp016714815	24	0	0.000576
102052126	BC-0345298860|k141_3179	Lenarviricota	d__Bacteria;p__Acidobacteriota;c__Thermoanaerobaculia;o__UBA5066;f__UBA5066;g__UBA5066;s__UBA5066 sp016714815	78	10	2.62e-17
102052126	SRR17497098|k141_13697_flag=1_multi=34.0000_len=1851	Pisuviricota	d__Bacteria;p__Acidobacteriota;c__Thermoanaerobaculia;o__UBA5066;f__UBA5066;g__UBA5066;s__UBA5066 sp016714815	44	3	4.42e-10
102052126	BC-0332570062|k141_61782	Lenarviricota	d__Bacteria;p__Acidobacteriota;c__Thermoanaerobaculia;o__UBA5066;f__UBA5066;g__UBA5066;s__UBA5066 sp016714815	33	0	5.72e-09
102052126	SRR10849744|k141_310535_flag=1_multi=101.0000_len=3955	Lenarviricota	d__Bacteria;p__Acidobacteriota;c__Thermoanaerobaculia;o__UBA5066;f__UBA5066;g__UBA5066;s__UBA5066 sp016714815	41	1	9.5e-12
102052126	SRR17481244|k141_92016_flag=1_multi=44.0000_len=3519	Lenarviricota	d__Bacteria;p__Acidobacteriota;c__Thermoanaerobaculia;o__UBA5066;f__UBA5066;g__UBA5066;s__UBA5066 sp016714815	34	0	1.59e-09
102052126	SRR11450579|k141_22903_flag=1_multi=93.0000_len=8250	Pisuviricota	d__Bacteria;p__Acidobacteriota;c__Thermoanaerobaculia;o__UBA5066;f__UBA5066;g__UBA5066;s__UBA5066 sp016714815	27	0	1.24e-05
102052126	SRR17497054|k141_191824_flag=1_multi=13.0000_len=2259	Pisuviricota	d__Bacteria;p__Acidobacteriota;c__Thermoanaerobaculia;o__UBA5066;f__UBA5066;g__UBA5066;s__UBA5066 sp016714815	40	0	7.34e-13
102052126	SRR11565437|k141_190787_flag=1_multi=8.0000_len=2964	Kitrinoviricota	d__Bacteria;p__Acidobacteriota;c__Thermoanaerobaculia;o__UBA5066;f__UBA5066;g__UBA5066;s__UBA5066 sp016714815	47	7	4.45e-05
102052126	SRR11829331|k141_332492_flag=1_multi=252.0000_len=4351	Lenarviricota	d__Bacteria;p__Acidobacteriota;c__Thermoanaerobaculia;o__UBA5066;f__UBA5066;g__UBA5066;s__UBA5066 sp016714815	78	10	2.62e-17
102052126	SRR17497092|k141_33398_flag=1_multi=217.0121_len=1878	Pisuviricota	d__Bacteria;p__Acidobacteriota;c__Thermoanaerobaculia;o__UBA5066;f__UBA5066;g__UBA5066;s__UBA5066 sp016714815	50	2	4.39e-15
102052126	SRR17497068|k141_144847_flag=1_multi=37.7881_len=1816	Pisuviricota	d__Bacteria;p__Acidobacteriota;c__Thermoanaerobaculia;o__UBA5066;f__UBA5066;g__UBA5066;s__UBA5066 sp016714815	78	10	2.62e-17
102052126	SRR17481242|k141_14860_flag=1_multi=140.0000_len=3974	Unclassified	d__Bacteria;p__Acidobacteriota;c__Thermoanaerobaculia;o__UBA5066;f__UBA5066;g__UBA5066;s__UBA5066 sp016714815	50	2	4.39e-15
102052126	SRR17509979|k141_53443_flag=1_multi=169.8080_len=4630	Kitrinoviricota	d__Bacteria;p__Acidobacteriota;c__Thermoanaerobaculia;o__UBA5066;f__UBA5066;g__UBA5066;s__UBA5066 sp016714815	50	2	4.39e-15
102052126	SRR18771403|k141_131354_flag=1_multi=48.8407_len=10690	Pisuviricota	d__Bacteria;p__Acidobacteriota;c__Thermoanaerobaculia;o__UBA5066;f__UBA5066;g__UBA5066;s__UBA5066 sp016714815	50	2	4.39e-15
102052126	SRR17509979|k141_54497_flag=1_multi=434.0000_len=1853	Pisuviricota	d__Bacteria;p__Acidobacteriota;c__Thermoanaerobaculia;o__UBA5066;f__UBA5066;g__UBA5066;s__UBA5066 sp016714815	50	2	4.39e-15
102052126	SRR11648360|k141_236875_flag=1_multi=13.0000_len=4864	urv.p.001	d__Bacteria;p__Acidobacteriota;c__Thermoanaerobaculia;o__UBA5066;f__UBA5066;g__UBA5066;s__UBA5066 sp016714815	31	0	7.39e-08
102052126	SRR17509979|k141_52575_flag=1_multi=83.6741_len=1804	Pisuviricota	d__Bacteria;p__Acidobacteriota;c__Thermoanaerobaculia;o__UBA5066;f__UBA5066;g__UBA5066;s__UBA5066 sp016714815	50	2	4.39e-15
102052126	SRR17497064|k141_128537_flag=1_multi=9.0000_len=1004	Pisuviricota	d__Bacteria;p__Acidobacteriota;c__Thermoanaerobaculia;o__UBA5066;f__UBA5066;g__UBA5066;s__UBA5066 sp016714815	31	1	3.44e-06
102052126	SRR11648176|k141_298601_flag=1_multi=36.0000_len=3120	Kitrinoviricota	d__Bacteria;p__Acidobacteriota;c__Thermoanaerobaculia;o__UBA5066;f__UBA5066;g__UBA5066;s__UBA5066 sp016714815	52	2	3.39e-16
102052126	SRR17509979|k141_40329_flag=1_multi=17.0000_len=1013	Pisuviricota	d__Bacteria;p__Acidobacteriota;c__Thermoanaerobaculia;o__UBA5066;f__UBA5066;g__UBA5066;s__UBA5066 sp016714815	33	1	4.45e-05
102052126	SRR17509979|k141_62709_flag=1_multi=44.0000_len=2751	Pisuviricota	d__Bacteria;p__Acidobacteriota;c__Thermoanaerobaculia;o__UBA5066;f__UBA5066;g__UBA5066;s__UBA5066 sp016714815	40	1	3.42e-11
102052126	SRR17509978|k141_113185_flag=1_multi=9.0000_len=1199	Pisuviricota	d__Bacteria;p__Acidobacteriota;c__Thermoanaerobaculia;o__UBA5066;f__UBA5066;g__UBA5066;s__UBA5066 sp016714815	39	4	1.24e-05
102052126	SRR17509978|k141_111246_flag=1_multi=25.3407_len=1855	Pisuviricota	d__Bacteria;p__Acidobacteriota;c__Thermoanaerobaculia;o__UBA5066;f__UBA5066;g__UBA5066;s__UBA5066 sp016714815	40	0	7.34e-13
102052126	SRR11828805|k141_11533_flag=1_multi=89.8329_len=3648	Kitrinoviricota	d__Bacteria;p__Acidobacteriota;c__Thermoanaerobaculia;o__UBA5066;f__UBA5066;g__UBA5066;s__UBA5066 sp016714815	45	1	9.5e-12
102052126	SRR17497049|k141_87067_flag=1_multi=464.0000_len=3624	Lenarviricota	d__Bacteria;p__Acidobacteriota;c__Thermoanaerobaculia;o__UBA5066;f__UBA5066;g__UBA5066;s__UBA5066 sp016714815	24	0	0.000576
102052126	SRR17509977|k141_156580_flag=1_multi=3.0000_len=1406	Pisuviricota	d__Bacteria;p__Acidobacteriota;c__Thermoanaerobaculia;o__UBA5066;f__UBA5066;g__UBA5066;s__UBA5066 sp016714815	36	2	2.66e-07
102052126	SRR17497126|k141_95757_flag=1_multi=826.0000_len=3116	Lenarviricota	d__Bacteria;p__Acidobacteriota;c__Thermoanaerobaculia;o__UBA5066;f__UBA5066;g__UBA5066;s__UBA5066 sp016714815	38	2	2.06e-08
102052126	SRR14530880|k119_2620_flag=1_multi=62.0000_len=4380	Kitrinoviricota	d__Bacteria;p__Acidobacteriota;c__Thermoanaerobaculia;o__UBA5066;f__UBA5066;g__UBA5066;s__UBA5066 sp016714815	55	2	7.29e-18
102052126	SRR17481244|k141_53629_flag=1_multi=27.0000_len=3662	Lenarviricota	d__Bacteria;p__Acidobacteriota;c__Thermoanaerobaculia;o__UBA5066;f__UBA5066;g__UBA5066;s__UBA5066 sp016714815	42	1	4.42e-10
102052126	SRR17497064|k141_135790_flag=1_multi=52.0000_len=1739	Pisuviricota	d__Bacteria;p__Acidobacteriota;c__Thermoanaerobaculia;o__UBA5066;f__UBA5066;g__UBA5066;s__UBA5066 sp016714815	50	2	4.39e-15
102052126	SRR10849374|k141_218357_flag=1_multi=12.0000_len=3750	Lenarviricota	d__Bacteria;p__Acidobacteriota;c__Thermoanaerobaculia;o__UBA5066;f__UBA5066;g__UBA5066;s__UBA5066 sp016714815	37	1	1.59e-09
102052126	SRR17509979|k141_28799_flag=1_multi=182.0000_len=1917	Pisuviricota	d__Bacteria;p__Acidobacteriota;c__Thermoanaerobaculia;o__UBA5066;f__UBA5066;g__UBA5066;s__UBA5066 sp016714815	50	1	1.58e-14
102052126	SRR17509976|k141_164083_flag=1_multi=58.0000_len=4337	Pisuviricota	d__Bacteria;p__Acidobacteriota;c__Thermoanaerobaculia;o__UBA5066;f__UBA5066;g__UBA5066;s__UBA5066 sp016714815	34	2	3.44e-06
102052126	SRR11450585|k141_260925_flag=1_multi=20.0000_len=6420	Unclassified	d__Bacteria;p__Acidobacteriota;c__Thermoanaerobaculia;o__UBA5066;f__UBA5066;g__UBA5066;s__UBA5066 sp016714815	51	2	9.5e-12
102052126	SRR17509977|k141_51278_flag=1_multi=666.0000_len=6190	Pisuviricota	d__Bacteria;p__Acidobacteriota;c__Thermoanaerobaculia;o__UBA5066;f__UBA5066;g__UBA5066;s__UBA5066 sp016714815	39	2	5.72e-09
102052126	SRR5829964|k141_20917_flag=1_multi=123.0000_len=1791	Kitrinoviricota	d__Bacteria;p__Acidobacteriota;c__Thermoanaerobaculia;o__UBA5066;f__UBA5066;g__UBA5066;s__UBA5066 sp016714815	31	2	0.00016
102052126	SRR17509979|k141_11840_flag=1_multi=73.0000_len=1384	Pisuviricota	d__Bacteria;p__Acidobacteriota;c__Thermoanaerobaculia;o__UBA5066;f__UBA5066;g__UBA5066;s__UBA5066 sp016714815	32	2	4.45e-05
102052126	SRR17509967|k141_44924_flag=1_multi=7.0000_len=2320	Pisuviricota	d__Bacteria;p__Acidobacteriota;c__Thermoanaerobaculia;o__UBA5066;f__UBA5066;g__UBA5066;s__UBA5066 sp016714815	39	3	2.66e-07
102052127	SRR10849374|k141_218357_flag=1_multi=12.0000_len=3750	Lenarviricota	d__Bacteria;p__Acidobacteriota;c__Thermoanaerobaculia;o__UBA5066;f__UBA5066;g__UBA5066;s__UBA5066 sp016714815	32	0	3.01e-08
102052127	SRR17509979|k141_54497_flag=1_multi=434.0000_len=1853	Pisuviricota	d__Bacteria;p__Acidobacteriota;c__Thermoanaerobaculia;o__UBA5066;f__UBA5066;g__UBA5066;s__UBA5066 sp016714815	65	0	8.25e-19
102052127	SRR11565437|k141_190787_flag=1_multi=8.0000_len=2964	Kitrinoviricota	d__Bacteria;p__Acidobacteriota;c__Thermoanaerobaculia;o__UBA5066;f__UBA5066;g__UBA5066;s__UBA5066 sp016714815	39	3	3.89e-07
102052127	SRR11648176|k141_298601_flag=1_multi=36.0000_len=3120	Kitrinoviricota	d__Bacteria;p__Acidobacteriota;c__Thermoanaerobaculia;o__UBA5066;f__UBA5066;g__UBA5066;s__UBA5066 sp016714815	62	0	3.84e-17
102052127	SRR10849744|k141_310535_flag=1_multi=101.0000_len=3955	Lenarviricota	d__Bacteria;p__Acidobacteriota;c__Thermoanaerobaculia;o__UBA5066;f__UBA5066;g__UBA5066;s__UBA5066 sp016714815	34	0	2.33e-09
102052127	SRR17509977|k141_156580_flag=1_multi=3.0000_len=1406	Pisuviricota	d__Bacteria;p__Acidobacteriota;c__Thermoanaerobaculia;o__UBA5066;f__UBA5066;g__UBA5066;s__UBA5066 sp016714815	32	1	1.4e-06
102052127	SRR11828805|k141_11533_flag=1_multi=89.8329_len=3648	Kitrinoviricota	d__Bacteria;p__Acidobacteriota;c__Thermoanaerobaculia;o__UBA5066;f__UBA5066;g__UBA5066;s__UBA5066 sp016714815	45	1	1.08e-07
102052127	BC-0345298860|k141_3179	Lenarviricota	d__Bacteria;p__Acidobacteriota;c__Thermoanaerobaculia;o__UBA5066;f__UBA5066;g__UBA5066;s__UBA5066 sp016714815	68	4	1.37e-21
102052127	SRR17509940|k141_117101_flag=1_multi=38.0000_len=2457	Duplornaviricota	d__Bacteria;p__Acidobacteriota;c__Thermoanaerobaculia;o__UBA5066;f__UBA5066;g__UBA5066;s__UBA5066 sp016714815	27	0	1.81e-05
102052127	SRR5829964|k141_20917_flag=1_multi=123.0000_len=1791	Kitrinoviricota	d__Bacteria;p__Acidobacteriota;c__Thermoanaerobaculia;o__UBA5066;f__UBA5066;g__UBA5066;s__UBA5066 sp016714815	31	2	0.000234
102052127	SRR17481242|k141_14860_flag=1_multi=140.0000_len=3974	Unclassified	d__Bacteria;p__Acidobacteriota;c__Thermoanaerobaculia;o__UBA5066;f__UBA5066;g__UBA5066;s__UBA5066 sp016714815	68	1	1.77e-20
102052127	SRR17497126|k141_95757_flag=1_multi=826.0000_len=3116	Lenarviricota	d__Bacteria;p__Acidobacteriota;c__Thermoanaerobaculia;o__UBA5066;f__UBA5066;g__UBA5066;s__UBA5066 sp016714815	33	0	1.4e-06
102052127	SRR17497064|k141_135790_flag=1_multi=52.0000_len=1739	Pisuviricota	d__Bacteria;p__Acidobacteriota;c__Thermoanaerobaculia;o__UBA5066;f__UBA5066;g__UBA5066;s__UBA5066 sp016714815	56	0	8.31e-14
102052127	SRR17509979|k141_62709_flag=1_multi=44.0000_len=2751	Pisuviricota	d__Bacteria;p__Acidobacteriota;c__Thermoanaerobaculia;o__UBA5066;f__UBA5066;g__UBA5066;s__UBA5066 sp016714815	43	1	1.4e-06
102052127	SRR17497054|k141_191824_flag=1_multi=13.0000_len=2259	Pisuviricota	d__Bacteria;p__Acidobacteriota;c__Thermoanaerobaculia;o__UBA5066;f__UBA5066;g__UBA5066;s__UBA5066 sp016714815	62	5	8.37e-09
102052127	SRR17509978|k141_111246_flag=1_multi=25.3407_len=1855	Pisuviricota	d__Bacteria;p__Acidobacteriota;c__Thermoanaerobaculia;o__UBA5066;f__UBA5066;g__UBA5066;s__UBA5066 sp016714815	55	3	3.01e-08
102052127	SRR17481244|k141_92016_flag=1_multi=44.0000_len=3519	Lenarviricota	d__Bacteria;p__Acidobacteriota;c__Thermoanaerobaculia;o__UBA5066;f__UBA5066;g__UBA5066;s__UBA5066 sp016714815	32	0	3.01e-08
102052127	SRR17509977|k141_137261_flag=1_multi=15.0000_len=2450	Kitrinoviricota	d__Bacteria;p__Acidobacteriota;c__Thermoanaerobaculia;o__UBA5066;f__UBA5066;g__UBA5066;s__UBA5066 sp016714815	34	0	1.81e-05
102052127	SRR17497068|k141_144847_flag=1_multi=37.7881_len=1816	Pisuviricota	d__Bacteria;p__Acidobacteriota;c__Thermoanaerobaculia;o__UBA5066;f__UBA5066;g__UBA5066;s__UBA5066 sp016714815	68	4	1.37e-21
102052127	SRR11450579|k141_22903_flag=1_multi=93.0000_len=8250	Pisuviricota	d__Bacteria;p__Acidobacteriota;c__Thermoanaerobaculia;o__UBA5066;f__UBA5066;g__UBA5066;s__UBA5066 sp016714815	27	0	1.81e-05
102052127	SRR17509979|k141_52575_flag=1_multi=83.6741_len=1804	Pisuviricota	d__Bacteria;p__Acidobacteriota;c__Thermoanaerobaculia;o__UBA5066;f__UBA5066;g__UBA5066;s__UBA5066 sp016714815	56	0	8.31e-14
102052127	SRR11829331|k141_332492_flag=1_multi=252.0000_len=4351	Lenarviricota	d__Bacteria;p__Acidobacteriota;c__Thermoanaerobaculia;o__UBA5066;f__UBA5066;g__UBA5066;s__UBA5066 sp016714815	68	4	1.37e-21
102052127	BC-0332570062|k141_61782	Lenarviricota	d__Bacteria;p__Acidobacteriota;c__Thermoanaerobaculia;o__UBA5066;f__UBA5066;g__UBA5066;s__UBA5066 sp016714815	32	0	3.01e-08
102052127	SRR17497064|k141_128537_flag=1_multi=9.0000_len=1004	Pisuviricota	d__Bacteria;p__Acidobacteriota;c__Thermoanaerobaculia;o__UBA5066;f__UBA5066;g__UBA5066;s__UBA5066 sp016714815	31	1	5.04e-06
102052127	SRR17509979|k141_40329_flag=1_multi=17.0000_len=1013	Pisuviricota	d__Bacteria;p__Acidobacteriota;c__Thermoanaerobaculia;o__UBA5066;f__UBA5066;g__UBA5066;s__UBA5066 sp016714815	29	1	6.52e-05
102052127	SRR11648360|k141_236875_flag=1_multi=13.0000_len=4864	urv.p.001	d__Bacteria;p__Acidobacteriota;c__Thermoanaerobaculia;o__UBA5066;f__UBA5066;g__UBA5066;s__UBA5066 sp016714815	29	0	1.4e-06
102052127	SRR17509979|k141_53443_flag=1_multi=169.8080_len=4630	Kitrinoviricota	d__Bacteria;p__Acidobacteriota;c__Thermoanaerobaculia;o__UBA5066;f__UBA5066;g__UBA5066;s__UBA5066 sp016714815	68	4	1.37e-21
102052127	SRR17509979|k141_28799_flag=1_multi=182.0000_len=1917	Pisuviricota	d__Bacteria;p__Acidobacteriota;c__Thermoanaerobaculia;o__UBA5066;f__UBA5066;g__UBA5066;s__UBA5066 sp016714815	53	0	3.87e-12
102052127	SRR18770931|k141_53716_flag=1_multi=6.0000_len=1000	Lenarviricota	d__Bacteria;p__Acidobacteriota;c__Thermoanaerobaculia;o__UBA5066;f__UBA5066;g__UBA5066;s__UBA5066 sp016714815	34	0	1.81e-05
102052127	SRR14530880|k119_2620_flag=1_multi=62.0000_len=4380	Kitrinoviricota	d__Bacteria;p__Acidobacteriota;c__Thermoanaerobaculia;o__UBA5066;f__UBA5066;g__UBA5066;s__UBA5066 sp016714815	45	4	8.37e-09
102052127	SRR17509977|k141_51278_flag=1_multi=666.0000_len=6190	Pisuviricota	d__Bacteria;p__Acidobacteriota;c__Thermoanaerobaculia;o__UBA5066;f__UBA5066;g__UBA5066;s__UBA5066 sp016714815	30	0	3.89e-07
102052127	SRR17497098|k141_13697_flag=1_multi=34.0000_len=1851	Pisuviricota	d__Bacteria;p__Acidobacteriota;c__Thermoanaerobaculia;o__UBA5066;f__UBA5066;g__UBA5066;s__UBA5066 sp016714815	66	7	2.99e-13
102052127	SRR17497092|k141_33398_flag=1_multi=217.0121_len=1878	Pisuviricota	d__Bacteria;p__Acidobacteriota;c__Thermoanaerobaculia;o__UBA5066;f__UBA5066;g__UBA5066;s__UBA5066 sp016714815	62	0	3.84e-17
102052127	SRR17497126|k141_68629_flag=1_multi=6.0000_len=1048	Pisuviricota	d__Bacteria;p__Acidobacteriota;c__Thermoanaerobaculia;o__UBA5066;f__UBA5066;g__UBA5066;s__UBA5066 sp016714815	24	0	0.000843
102052127	SRR17481244|k141_53629_flag=1_multi=27.0000_len=3662	Lenarviricota	d__Bacteria;p__Acidobacteriota;c__Thermoanaerobaculia;o__UBA5066;f__UBA5066;g__UBA5066;s__UBA5066 sp016714815	44	2	1.81e-05
102052127	SRR17509976|k141_164083_flag=1_multi=58.0000_len=4337	Pisuviricota	d__Bacteria;p__Acidobacteriota;c__Thermoanaerobaculia;o__UBA5066;f__UBA5066;g__UBA5066;s__UBA5066 sp016714815	34	0	1.81e-05
102052127	SRR17509967|k141_44924_flag=1_multi=7.0000_len=2320	Pisuviricota	d__Bacteria;p__Acidobacteriota;c__Thermoanaerobaculia;o__UBA5066;f__UBA5066;g__UBA5066;s__UBA5066 sp016714815	40	3	1.81e-05
102052127	SRR17509978|k141_113185_flag=1_multi=9.0000_len=1199	Pisuviricota	d__Bacteria;p__Acidobacteriota;c__Thermoanaerobaculia;o__UBA5066;f__UBA5066;g__UBA5066;s__UBA5066 sp016714815	33	1	6.52e-05
102052127	SRR18771403|k141_131354_flag=1_multi=48.8407_len=10690	Pisuviricota	d__Bacteria;p__Acidobacteriota;c__Thermoanaerobaculia;o__UBA5066;f__UBA5066;g__UBA5066;s__UBA5066 sp016714815	64	0	2.97e-18
[truncated: 7,582 more rows]
