# Supplementary material for: Diversity and Distinctive Characteristics of the Global RNA Virome in Urban Environments
Source: Research Square preprint supplement (doi:10.21203/rs.3.rs-6735172/v1), 2025-06-26
Supplement: Supplementary file 13 [file c56fc5935cbd5fa1513c44c5.xlsx]

## Sheet: Supplementary Table 10
Relative abundance of 27 human pathogenic RNA viruses estimated by Bracken
virus_characteristics/SAMPLE_ID	s__Betacoronavirus_1	s__Chikungunya_virus	s__Dengue_virus	s__Zaire_ebolavirus	s__Enterovirus_A	s__Enterovirus_B	s__Enterovirus_C	s__Enterovirus_D	s__Influenza_A_virus	s__Hepacivirus_C	s__Human_metapneumovirus	s__Human_orthopneumovirus	s__Human_respirovirus_3	s__Middle_East_respiratory_syndrome-related_coronavirus	s__Measles_morbillivirus	s__Mumps_orthorubulavirus	s__Norwalk_virus	s__Parechovirus_A	s__Rhinovirus_A	s__Severe_acute_respiratory_syndrome-related_coronavirus	s__Sapporo_virus	s__Tick-borne_encephalitis_virus	s__West_Nile_virus	s__Yellow_fever_virus	s__Zika_virus
Family	Coronaviridae	Togaviridae	Flaviviridae	Filoviridae	Picornaviridae	Picornaviridae	Picornaviridae	Picornaviridae	Orthomyxoviridae	Flaviviridae	Pneumoviridae	Pneumoviridae	Paramyxoviridae	Coronaviridae	Paramyxoviridae	Paramyxoviridae	Caliciviridae	Picornaviridae	Picornaviridae	Coronaviridae	Caliciviridae	Flaviviridae	Flaviviridae	Flaviviridae	Flaviviridae
Order	Nidovirales	Martellivirales	Amarillovirales	Mononegavirales	Picornavirales	Picornavirales	Picornavirales	Picornavirales	Articulavirales	Amarillovirales	Mononegavirales	Mononegavirales	Mononegavirales	Nidovirales	Mononegavirales	Mononegavirales	Picornavirales	Picornavirales	Picornavirales	Nidovirales	Picornavirales	Amarillovirales	Amarillovirales	Amarillovirales	Amarillovirales
Tax_id	694003	37124	12637	186538	138948	138949	138950	138951	41857	11103	162145	11250	11216	1335626	11234	2560602	11983	1803956	147711	2697049	95342	11084	11082	11089	64320
Abbreviation	BCoV1	CHIKV	DENV	Ebola	EVA	EVB	EVC	EVD	H3N2	HCV	HMPV	HRSV	HRV3	MERS	MMV	MRV	Norwalk	PeVA	RVA	SARS2	SV	TBEV	WNV	YFV	ZIKV
Transmission	aerosolic	vector	vector	body fluids	fecal-oral	fecal-oral	fecal-oral	fecal-oral	aerosolic	blood/ sexual	aerosolic	aerosolic	aerosolic	aerosolic	aerosolic	aerosolic	fecal-oral	aerosolic	aerosolic	aerosolic	fecal-oral	vector	vector	vector	vector
6134-CEM-0877	0	0	0	0	0	0	0	0	0	0	0	0	0	0	0	0	0	0	0	0	0	0	0	0	0
6134-CEM-0878	0	0	0	0	0	0	0	0	0	0	0	0	0	0	0	0	0	0	0	0	0	0	0	0	0
6134-CEM-0879	0	0	0	0	0	0	0	0	0	0	0	0	0	0	0	0	0	0	0	0	0	0	0	0	0
6134-CEM-0881	0	0	0	0	0	0	0	0	0	0	0	0	0	0	0	0	0	0	0	0	0	0	0	0	0
6134-CEM-0882	0	0	0	0	0	0	0	0	0	0	0	0	0	0	0	0	0	0	0	0	0	0	0	0	0
6134-CEM-0883	0	0	0	0	0	0	0	0	0	0	0	0	0	0	0	0	0	0	0	0	0	0	0	0	0
6134-CEM-0885	0	0	0	0	0	0	0	0	0	0	0	0	0	0	0	0	0	0	0	0	0	0	0	0	0
6134-CEM-0886	0	0	0	0	0	0	0	0	0	0	0	0	0	0	0	0	0	0	0	0	0	0	0	0	0
6134-CEM-0887	0	0	0	0	0	0	0	0	0	0	0	0	0	0	0	0	0	0	0	0	0	0	0	0	0
6134-CEM-0889	0	0	0	0	0	0	0	0	0	0	0	0	0	0	0	0	0	0	0	0	0	0	0	0	0
6134-CEM-0890	0	0	0	0	0	0	0	0	0	0.000226772	0	0	0	0	0	0	0	0	0	0.000136063	0	0	0	0	0
6134-CEM-0891	0	0	0	0	0	0	0	0	0	0	0	0	0	0	0	0	0	0	0	0	0	0	0	0	0
6134-CEM-0892	0	0	0	0	0	0	0	0	0	0	0	0	0	0	0	0	0	0	0	0.00164816	0	0	0	0	0
6134-CEM-0893	0	0	0	0	0	0	0	0	0	0	0	0	0	0	0	0	0	0	0	0	0	0	0	0	0
6134-CEM-0894	0	0	0	0	0	0	0	0	0	0	0	0	0	0	0	0	0	0	0	0	0	0	0	0	0
6134-CEM-0895	0	0	0	0	0	0	0	0	0	0	0	0	0	0	0	0	0	0	0	0	0	0	0	0	0
6134-CEM-0896	0	0	0	0	0	0	0	0	0	0	0	0	0	0	0	0	0	0	0	0	0	0	0	0	0
6134-CEM-0897	0	0	0	0	0	0	0	0	0	0	0	0	0	0	0	0	0	0	0	0	0	0	0	0	0
6134-CEM-0899	0	0	0	0	0	0	0	0	0	0	0	0	0.00167762	0	0	0	0	0	0	0	0	0	0	0	0
6134-CEM-0900	0	0	0	0	0	0.000440869	0	0	0	0	0	0	0	0	0	0	0	0	0	0	0	0	0	0	0
6134-CEM-0901	0	0	0	0	0	0	0	0	0	0	0	0	0	0	0	0	0.000415298	0	0	0	0	0	0	0	0
6134-CEM-0904	0	0	0	0	0	0	0	0	0	0	0	0	0	0	0	0	0	0	0	0	0	0	0	0	0
6134-CEM-0905	0	0	0	0	0	0	0	0	0	0	0	0	0	0	0	0	0	0	0	0	0	0	0	0	0
6134-CEM-0907	0	0	0	0	0	0	0	0	0	0	0	0	0	0	0	0	0	0	0	0	0	0	0	0	0
6134-CEM-0908	0	0	0	0	0	0	0	0	0	0	0	0	0	0	0	0	0	0	0	0	0	0	0	0	0
6134-CEM-0909	0	0	0	0	0	0	0	0	0	0	0	0	0	0	0	0	0	0	0	0	0	0	0	0	0
6134-CEM-0910	0	0	0	0	0	0	0	0	0	0	0	0	0	0	0	0	0	0	0	0	0	0	0	0	0
6134-CEM-0911	0	0	0	0	0	0	0.00273434	0	0	0	0	0	0	0	0	0	0	0	0	0	0	0	0	0	0
6134-CEM-0912	0	0	0	0	0	0	0	0	0	0	0	0	0	0	0	0	0	0	0	0	0	0	0	0	0
6134-CEM-0913	0	0	0	0	0	0	0	0	0	0	0	0	0	0	0	0	0	0	0	0	0	0	0	0	0
6134-CEM-0915	0	0	0	0	0	0	0	0	0	0	0	0	0	0	0	0	0	0	0	0	0	0	0	0	0
6134-CEM-0916	0	0	0	0	0	0	0	0	0	0	0	0	0	0	0	0	0	0	0	0	0	0	0.00107707	0	0
6134-CEM-0917	0	0	0	0	0	0	0	0	0	0	0	0	0	0	0	0	0	0	0	0	0	0	0	0	0
6134-CEM-0918	0	0	0	0	0	0	0	0	0	0	0	0	0	0	0	0	0	0	0	0	0	0	0	0	0
6134-CEM-0919	0	0	0	0	0	0	0	0	0	0	0	0	0	0	0	0	0	0	0	0	0	0	0	0	0
6134-CEM-0920	0	0	0	0	0	0	0	0	0	0	0	0	0	0	0	0	0	0	0	0	0	0	0	0	0
6134-CEM-0921	0	0	0	0	0	0	0	0	0	0	0	0	0	0	0	0	0	0	0	0	0	0	0	0	0
6134-CEM-0922	0	0	0	0	0	0	0	0	0	0	0	0	0	0	0	0	0	0	0	0	0	0	0	0	0
6134-CEM-0923	0	0	0	0	0	0	0	0	0	0	0	0	0	0	0	0	0	0	0	0	0	0	0	0	0
6134-CEM-0924	0	0	0	0	0	0	0	0	0	0	0	0	0	0	0	0	0	0	0	0	0	0	0	0	0
6134-CEM-0925	0	0	0	0	0	0	0	0	0	0	0	0	0	0	0	0	0	0	0	0	0	0	0	0	0
6134-CEM-0926	0	0	0	0	0	0	0	0	0	0	0	0	0	0	0	0	0	0	0	0	0	0	0	0	0
6134-CEM-0927	0	0	0	0	0	0	0	0	0	0	0	0	0	0	0	0	0	0	0	0.00123549	0	0	0	0	0
6134-CEM-0928	0	0	0	0	0	0	0	0	0	0	0	0	0	0	0	0	0	0	0	0.0271378	0	0	0	0	0
6134-CEM-0929	0	0	0	0	0	0	0	0	0	0	0	0	0	0	0	0	0	0	0	0	0	0	0	0	0
6134-CEM-0930	0	0	0	0	0	0	0	0	0	0	0	0	0	0	0	0	0	0	0	0	0	0	0	0	0
6134-CEM-0932	0	0	0	0	0	0	0	0	0	0	0	0	0	0	0	0	0	0	0	0	0	0	0	0	0
6134-CEM-0933	0	0	0	0	0	0	0	0	0	0	0	0	0	0	0	0	0	0	0	0	0	0	0	0	0
6134-CEM-0934	0	0	0	0	0	0.000766037	0	0	0	0	0	0	0	0	0	0	0	0	0	0	0	0	0	0	0
6134-CEM-0935	0	0	0	0	0	0	0	0	0	0	0	0	0	0	0	0	0	0	0	0	0	0	0	0	0
6134-CEM-0936	0	0	0	0	0	0	0	0	0	0	0	0	0	0	0	0	0	0	0	0.437913	0	0	0	0	0
6134-CEM-0937	0	0	0	0	0	0	0	0	0	0	0	0	0	0	0	0	0	0	0	0	0	0	0	0	0
6134-CEM-0938	0	0	0	0	0	0	0	0	0	0	0	0	0	0	0	0	0	0	0	0	0	0	0	0	0
6134-CEM-0940	0	0	0	0	0	0	0	0	0	0	0	0	0	0	0	0	0	0	0	0	0	0	0	0	0
6134-CEM-0941	0	0	0	0	0	0	0	0	0	0	0	0	0	0	0	0	0	0	0	0	0	0	0	0	0
6134-CEM-0942	0	0	0	0	0	0	0	0	0	0	0	0	0	0	0	0	0	0	0	0	0	0	0	0	0
6134-CEM-0943	0	0	0	0	0	0	0	0	0	0	0	0	0	0	0	0	0	0	0	0	0	0	0	0	0
6134-CEM-0944	0	0	0	0	0	0	0	0	0	0	0	0.00178908	0	0	0	0	0	0	0	0	0	0	0	0	0
6134-CEM-0945	0	0	0	0	0	0	0	0	0	0	0	0	0	0	0	0	0	0	0	0	0	0	0	0	0
6134-CEM-0946	0	0	0	0	0	0	0	0	0	0	0	0	0	0	0	0	0	0	0	0	0	0	0	0	0
6134-CEM-0948	0	0	0.00149313	0	0	0	0	0	0	0	0	0	0	0	0	0	0	0	0	0	0	0	0	0	0
6134-CEM-0950	0	0	0	0	0	0	0	0	0	0	0	0	0	0	0	0	0	0	0	0	0	0	0	0	0
6134-CEM-0951	0	0	0	0	0	0	0	0	0	0	0	0	0.000433011	0	0	0	0	0	0	0	0	0	0	0	0
6134-CEM-0952	0	0	0	0	0	0	0	0	0	0	0	0	0	0	0	0	0	0	0	0	0	0	0	0	0
6134-CEM-0953	0	0	0	0	0	0	0	0	0	0	0	0	0	0	0	0	0	0	0	0	0	0	0	0	0
6134-CEM-0954	0	0	0	0	0	0	0	0	0	0	0	0	0	0.000116226	0	0	0	0	0	0.000635368	0	0	0	0	0
6134-CEM-0955	0	0	0	0	0	0	0	0	0	0	0	0	0	0	0	0	0	0	0	0	0	0	0	0	0
6134-CEM-0956	0	0	0	0	0	0	0	0	0	0	0	0	0	0	0	0	0	0	0	0	0	0	0	0	0
6134-CEM-0957	0	0	0	0	0	0	0	0	0	0	0	0	0	0	0	0	0	0	0	0	0	0	0	0	0
6134-CEM-0958	0	0	0	0	0	0	0	0	0	0	0	0	0	0	0	0	0	0	0	0	0	0	0	0	0
6134-CEM-0959	0	0	0	0	0	0	0	0	0	0	0	0	0	0	0	0	0	0	0	0	0	0	0	0	0
6134-CEM-0960	0	0	0	0	0	0	0	0	0	0	0	0	0	0	0	0	0	0	0	0	0	0	0	0	0
6134-CEM-0961	0	0	0	0	0	0	0	0	0	0	0	0	0	0	0	0	0.000536073	0	0	0	0	0	0	0	0
6134-CEM-0962	0	0	0	0	0	0	0	0	0	0	0	0	0	0	0	0	0	0	0	0	0	0	0	0	0
6134-CEM-0963	0	0	0	0	0	0	0	0	0	0	0	0	0	0	0	0	0	0	0	0.000327381	0	0	0	0	0
6134-CEM-0964	0	0	0	0	0	0	0	0	0	0	0	0	0	0	0	0	0	0	0	0	0	0	0	0	0
6134-CEM-0965	0	0	0	0	0	0	0	0	0	0	0	0	0	0	0	0	0	0	0	0	0	0	0	0	0
6134-CEM-0966	0	0	0	0	0	0	0	0	0	0	0	0	0	0	0	0	0	0	0	0	0	0	0	0	0
6134-CEM-0967	0	0	0	0	0	0	0	0	0	0	0	0	0	0	0	0	0	0	0	0	0	0	0	0	0.000223348
6134-CEM-0968	0	0	0	0	0	0	0	0	0	0	0	0	0	0	0	0	0	0	0	0	0	0	0	0	0
6134-CEM-0969	0	0	0	0	0	0	0	0	0	0	0	0	0	0	0	0.00298496	0	0	0	0	0	0	0	0	0
6134-CEM-0970	0	0	0	0	0	0	0	0	0.00231854	0	0	0.00144418	0	0	0	0	0	0	0	0	0	0	0	0	0
6134-CEM-0971	0	0	0	0	0	0	0	0	0	0	0	0	0	0	0	0	0	0	0	0	0	0	0	0	0
6134-CEM-0972	0	0	0	0	0	0	0	0	0	0.000126932	0	0	0	0	0	0	0	0	0	0	0	0	0	0	0
6134-CEM-0973	0	0	0	0	0	0	0	0	0	0	0	0	0	0	0	0	0	0	0	0	0	0	0	0	0
6134-CEM-0974	0	0	0	0	0	0	0	0	0	0	0	0	0	0	0	0	0	0	0	0	0	0	0	0	0
6134-CEM-0975	0	0	0	0	0	0.000254294	0	0	0	0	0	0	0	0	0	0	0	0	0	0	0	0	0	0	0
6134-CEM-0976	0	0	0	0	0	0	0	0	0	0	0	0	0	0	0	0	0	0	0	0	0	0	0	0	0
6134-CEM-0977	0	0	0	0	0	0	0	0	0	0	0	0	0	0	0	0	0	0	0	0.0114237	0	0	0	0	0
6134-CEM-0978	0	0	0	0	0	0	0	0	0	0	0	0	0	0	0	0	0	0	0	0	0	0	0	0	0
6134-CEM-0980	0	0	0	0	0	0	0	0	0	0	0	0	0	0	0	0	0	0	0	0	0	0	0	0	0
6134-CEM-0981	0	0	0	0	0	0	0	0	0	0	0	0	0	0	0	0	0	0	0	0	0	0	0	0	0
6134-CEM-0982	0	0	0	0	0	0	0	0	0	0	0	0	0	0	0	0	0	0	0	0.00400252	0	0	0	0	0
6134-CEM-0983	0	0	0	0	0	0	0	0	0	0	0	0	0	0	0	0	0	0	0	0	0	0	0	0	0
6134-CEM-0984	0	0	0	0	0	0	0	0	0	0	0	0	0	0	0	0	0	0	0	0.00196609	0	0	0	0	0
6134-CEM-0985	0	0	0	0	0	0	0	0	0	0	0	0	0	0	0	0	0	0	0	0	0	0	0	0	0
6134-CEM-0986	0	0	0	0	0	0	0	0	0	0	0	0	0	0	0	0	0	0	0	0	0	0	0	0	0
6134-CEM-0988	0	0	0	0	0	0	0	0	0	0	0	0	0	0	0	0	0	0	0	0	0	0	0	0	0
6134-CEM-0989	0	0	0	0	0	0	0	0	0	0	0	0	0	0	0	0	0	0	0	0	0	0	0	0	0
6134-CEM-0990	0	0	0	0	0	0	0	0	0	0	0	0	0	0	0	0	0	0	0	0	0	0	0	0	0
6134-CEM-0991	0	0	0	0	0	0	0	0	0	0	0	0	0	0	0	0	0	0	0	0	0	0	0	0	0
6134-CEM-0992	0	0	0	0	0	0	0	0	0	0	0	0	0	0	0	0	0	0	0	0	0	0	0	0	0
6134-CEM-0993	0	0	0	0	0	0	0	0	0	0	0	0	0	0	0	0	0	0.00231253	0	0	0	0	0	0	0
6134-CEM-0994	0	0	0	0	0	0	0	0	0	0	0	0	0	0	0	0	0	0	0	0	0	0	0	0	0.00060042
6134-CEM-0995	0	0	0	0	0	0	0	0	0	0	0	0	0	0	0	0	0	0	0	0.000945758	0	0	0	0	0
6134-CEM-0996	0	0	0	0	0	0	0	0	0	0	0	0	0	0	0	0	0	0	0	0	0	0	0.000745568	0	0
6134-CEM-0998	0	0	0	0	0	0	0	0	0	0	0	0	0	0	0	0	0	0	0	0	0	0	0	0	0
6134-CEM-0999	0	0	0	0	0	0	0	0	0	0	0	0	0	0	0	0	0	0	0	0	0	0	0	0	0
6134-CEM-1000	0	0	0	0	0	0	0	0	0	0	0	0	0	0	0	0	0	0	0	0.00018967	0	0	0	0	0
6134-CEM-1001	0	0	0	0	0	0	0	0	0	0	0	0	0	0	0	0	0	0	0	0	0	0	0	0	0
6134-CEM-1002	0	0	0	0	0	0	0	0	0	0	0	0	0	0	0	0	0	0	0	0	0	0	0	0	0
6134-CEM-1004	0	0	0	0	0	0	0	0	0	0	0	0	0	0	0	0	0	0	0	0	0	0	0	0	0
6134-CEM-1005	0	0	0	0	0	0	0	0	0	0	0	0	0	0	0	0	0	0	0	0	0	0	0	0	0.00279125
6134-CEM-1006	0	0	0	0	0	0	0	0	0	0	0	0	0	0	0	0	0	0	0	0.000725374	0	0	0	0	0
6134-CEM-1007	0	0	0	0	0	0	0	0	0	0	0	0	0	0	0	0	0	0	0	0.00080838	0	0	0	0	0
6134-CEM-1008	0	0	0	0	0	0	0	0	0	0	0	0	0	0	0	0	0	0	0	0	0	0	0	0	0
6134-CEM-1009	0	0	0	0	0	0	0	0	0	0	0	0	0	0	0	0	0.000743805	0	0	0.00034469	0	0	0	0	0
6134-CEM-1010	0	0	0	0	0	0.00269387	0	0	0	0	0	0	0	0	0	0	0	0	0	0	0	0	0	0	0
6134-CEM-1011	0	0	0	0	0	0	0	0	0	0	0	0	0	0	0	0	0	0	0	0	0	0	0	0	0.00146966
6134-CEM-1012	0	0	0	0	0	0	0	0	0	0	0	0	0	0	0	0	0	0	0	0	0	0	0	0	0
6134-CEM-1013	0	0	0	0	0	0	0	0	0	0	0	0	0	0	0	0	0	0	0	0	0	0	0	0	0
6134-CEM-1014	0	0	0	0	0	0	0	0	0	0	0	0	0	0	0	0	0	0	0	0.00082484	0	0	0	0	0
6134-CEM-1015	0	0	0	0	0	0	0	0	0	0	0	0	0	0	0	0	0	0	0	0	0	0	0	0	0
6134-CEM-1016	0	0	0	0	0	0	0	0	0	0	0	0	0	0	0	0	0	0	0	0.0172124	0	0	0	0	0
6134-CEM-1017	0	0	0	0	0	0	0	0	0	0	0	0	0	0	0	0	0	0	0	0	0	0	0	0	0
6134-CEM-1018	0	0	0	0	0	0	0	0	0	0	0	0	0	0	0	0	0	0	0	0	0	0	0	0	0
6134-CEM-1019	0	0	0	0	0	0	0	0	0.00122855	0	0	0	0	0	0	0	0	0	0	0	0	0	0	0	0
6134-CEM-1020	0	0	0	0	0	0	0	0	0	0	0	0	0	0	0	0	0	0	0	0	0	0	0	0	0
6134-CEM-1022	0	0	0	0	0	0	0	0	0	0	0	0	0	0	0	0	0	0	0	0	0	0	0	0	0
6134-CEM-1023	0	0	0	0	0	0	0	0	0	0	0	0	0	0	0	0	0	0	0	0	0	0	0	0	0
6134-CEM-1024	0	0	0	0	0	0	0	0	0	0	0	0	0	0	0	0	0	0	0	0.000434137	0	0	0	0	0
6134-CEM-1026	0	0	0.00116117	0	0	0	0	0	0	0	0	0	0	0	0	0	0	0	0	0	0	0	0	0	0
6134-CEM-1027	0	0	0	0	0	0	0	0	0	0	0	0	0	0	0	0	0	0	0	0	0	0	0	0	0
6134-CEM-1028	0	0	0	0	0	0	0	0	0	0	0	0	0	0	0	0	0	0	0	0	0	0	0	0	0
6134-CEM-1029	0	0	0	0	0	0	0	0	0	0	0	0	0	0	0	0	0	0	0	0	0	0	0	0	0
6134-CEM-1030	0	0	0	0	0	0	0	0	0.00175036	0	0	0	0	0	0	0	0	0	0	0	0	0	0	0	0
6134-CEM-1031	0	0	0	0	0	0	0	0	0	0	0	0	0	0	0	0	0	0	0	0	0	0	0	0	0
6134-CEM-1033	0	0	0	0	0	0	0	0	0	0	0	0	0	0	0	0	0	0	0	0	0	0	0	0	0
6134-CEM-1034	0	0	0	0	0	0	0	0	0	0	0	0	0	0	0	0	0	0	0	0	0	0	0	0	0
6134-CEM-1035	0	0	0	0	0	0	0	0	0	0	0	0	0	0	0	0	0	0	0	0	0	0	0	0	0
6134-CEM-1036	0	0	0	0	0	0	0	0	0	0	0	0	0	0	0	0	0	0	0	0	0	0	0	0	0
6134-CEM-1037	0	0	0	0	0	0	0	0	0	9.28697e-05	0	0	0	0	0	0	0	0	0	9.28697e-05	0	0	0	0	0
6134-CEM-1038	0	0	0	0	0	0	0	0	0	0	0	0	0	0	0	0	0.000535573	0	0	0	0	0	0	0	0
6134-CEM-1039	0	0	0	0	0	0	0	0	0	0	0	0	0	0	0	0	0	0	0	0	0	0	0	0	0
6134-CEM-1040	0	0	0	0	0	0	0	0	0	0	0	0	0	0	0	0	0	0	0	0	0	0	0	0	0
6134-CEM-1041	0	0	0	0	0	0	0	0	0	0	0	0	0	0	0	0	0	0	0	0	0	0	0	0	0
6134-CEM-1042	0	0	0	0	0	0	0	0	0	0	0	0	0	0	0	0	0	0	0	0.000329811	0	0	0	0	0
6134-CEM-1043	0	0	0	0	0	0	0	0	0	0	0	0	0	0	0	0	0	0	0	0	0	0	0	0	0
6134-CEM-1044	0	0	0	0	0	0	0	0	0	0	0	0	0	0	0	0	0	0	0	0	0	0	0	0	0
6134-CEM-1045	0	0	0	0	0	0	0	0	0	0	0	0	0	0	0	0	0	0	0	0	0	0	0	0	0
6134-CEM-1046	0	0	0	0	0	0	0	0	0	0	0	0	0	0	0	0	0	0	0	0	0	0	0	0	0
6134-CEM-1047	0	0	0	0	0	0	0	0	0	0	0	0	0	0	0	0	0	0	0	0	0	0	0	0	0
6134-CEM-1048	0	0	0	0	0	0	0	0	0	0	0	0	0	0	0	0	0	0	0	0	0	0	0	0	0
6134-CEM-1049	0	0	0	0	0	0	0	0	0	0	0	0	0	0	0	0	0	0	0	0	0	0	0	0	0
6134-CEM-1050	0	0	0	0	0	0	0	0	0	0	0	0	0	0	0	0	0	0	0	0	0	0	0	0	0
6134-CEM-1051	0	0	0	0	0	0	0	0	0	0	0	0	0	0	0	0	0	0	0	0	0	0	0	0	0
6134-CEM-1052	0	0	0	0	0	0	0	0	0	0	0	0	0	0	0	0	0	0	0	0	0	0	0	0	0
6134-CEM-1053	0	0	0	0	0.000868731	0	0	0	0	0	0	0	0	0	0	0	0	0	0	0	0	0	0	0	0
6134-CEM-1054	0	0	0	0	0	0	0	0	0	0	0	0	0	0	0	0	0	0	0	0.000308146	0	0	0	0	0
6134-CEM-1055	0	0	0	0	0	0	0	0	0	0	0	0	0	0	0	0	0	0	0	0	0	0	0	0	0
6134-CEM-1056	0	0	0	0	0	0	0	0	0	0	0	0	0	0	0	0	0	0	0	0	0	0	0	0	0
6134-CEM-1057	0	0	0	0	0	0	0	0	0	0	0	0	0	0	0	0	0	0	0	0	0	0	0	0	0
6134-CEM-1058	0	0	0	0	0	0	0	0	0	0	0	0	0	0	0	0	0	0	0	0	0	0	0	0	0
6134-CEM-1059	0	0	0	0	0	0	0	0	0	0	0	0	0	0	0	0	0	0	0	0	0	0	0	0	0
6134-CEM-1060	0	0	0	0	0	0	0	0	0	0	0	0	0	0	0	0	0	0	0	0	0	0	0	0	0
6134-CEM-1061	0	0	0	0	0	0	0	0	0	0	0	0	0	0	0	0	0	0	0	0	0	0	0	0	0
6134-CEM-1062	0	0	0	0	0	0	0	0	0	0	0	0.000192019	0	0	0	0	0	0	0	0	0	0	0	0	0
6134-CEM-1063	0	0	0	0	0	0	0	0	0	0	0	0	0	0	0	0	0	0.000156826	0	0	0	0	0	0	0
6134-CEM-1064	0	0	0	0	0	0	0	0	0	0	0	0	0	0	0	0	0	0	0	0.000207611	0	0	0	0	0
6134-CEM-1065	0	0	0	0	0	0	0	0	0	0	0	0	0	0	0	0	0	0	0	0	0	0	0	0	0
6134-CEM-1066	0	0	0	0	0	0	0	0	0	0	0	0	0	0	0	0	0	0	0	0	0	0	0	0	0
6134-CEM-1067	0	0	0	0	0	0	0	0	0	0	0	0	0.000669182	0	0	0	0	0	0	0	0	0	0	0	0
6134-CEM-1068	0	0	0	0	0	0	0	0	0	0	0	0	0	0	0	0	0	0	0	0	0	0	0	0	0
6134-CEM-1069	0	0	0	0	0	0	0	0	0	0	0	0	0	0	0	0	0	0	0	0	0	0	0	0	0
6134-CEM-1070	0	0	0	0	0	0	0	0	0	0	0	0	0	0	0	0	0	0	0	0	0	0	0	0	0
6134-CEM-1071	0	0	0	0	0	0	0	0	0	0	0	0	0	0	0	0	0	0	0	0	0	0	0	0	0
6134-CEM-1072	0	0	0	0	0	0	0	0	0	0	0	0	0	0	0	0	0	0	0	0	0	0	0	0	0
6134-CEM-1073	0	0	0	0	0	0	0	0	0	0	0	0	0	0	0	0	0	0	0	0	0	0	0	0	0
6134-CEM-1074	0	0	0	0	0	0	0	0	0	0	0	0	0	0	0	0	0	0	0	0	0	0	0	0	0
6134-CEM-1075	0	0	0	0	0	0	0	0	0	0	0	0	0	0	0	0	0	0	0	0.00824033	0	0	0	0	0
6134-CEM-1076	0	0	0	0	0	0	0	0	0	0	0	0	0	0	0	0	0	0	0	0	0	0	0	0	0
6134-CEM-1077	0	0	0	0	0	0	0	0	0	0	0	0	0	0	0	0	0	0	0	0	0	0	0	0	0
6134-CEM-1079	0	0	0	0	0	0.000252568	0	0	0	0	0	0	0	0	0	0	0	0	0	0	0	0	0	0	0
6134-CEM-1080	0	0	0	0	0	0	0	0	0	0	0	0	0	0	0	0	0	0	0	0	0	0	0	0	0
6134-CEM-1081	0	0	0	0	0	0	0	0	0	0	0	0	0	0	0	0	0	0	0	0.0121215	0	0	0	0	0
6134-CEM-1082	0	0	0	0	0	0	0	0	0	0	0	0	0	0	0	0	0	0	0	0	0	0	0	0	0
6134-CEM-1083	0	0	0	0	0	0	0	0	0	0	0	0	0	0	0	0	0	0	0	0.000238013	0	0	0	0	0
6134-CEM-1084	0	0	0	0	0	0	0	0	0	0	0	0	0	0	0	0	0.00407255	0	0	0	0	0	0	0	0
6134-CEM-1085	0	0	0	0	0	0	0	0	0	0	0	0	0	0	0	0	0	0	0	0	0	0	0	0	0
6134-CEM-1086	0	0	0	0	0	0	0	0	0	0	0	0	0	0	0	0	0	0	0	0	0	0	0	0	0
6134-CEM-1087	0	0	0	0	0	0	0	0	0	0	0	0	0	0	0	0	0	0	0	0	0	0	0	0	0
6134-CEM-1088	0	0	0	0	0	0	0	0	0	0	0	0	0	0	0	0	0	0	0	0	0	0	0	0	0
6134-CEM-1091	0	0	0	0	0	0	0	0	0	0	0	0	0	0	0	0	0.000914432	0	0	0	0	0	0	0	0
6134-CEM-1092	0	0	0	0	0	0	0	0	0	0	0	0	0	0	0	0	0	0	0	0.00034393	0	0	0	0	0
6134-CEM-1093	0	0	0	0	0	0	0	0	0	0	0	0	0	0	0	0	0	0	0	0	0	0	0	0	0
6134-CEM-1094	0	0	0	0	0	0	0	0	0	0	0	0	0	0	0	0	0	0	0	0	0	0	0	0	0
6134-CEM-1095	0	0	0	0	0	0	0	0	0	0	0	0	0	0	0	0	0	0	0	0	0	0	0	0	0
6134-CEM-1096	0	0	0	0	0	0	0	0	0	0	0	0	0	0	0	0	0	0	0	0	0	0	0	0	0
6134-CEM-1097	0	0	0	0	0	0	0	0	0	0	0	0	0	0	0	0	0	0	0	0	0	0	0	0	0
6134-CEM-1098	0	0	0	0	0	0	0	0	0	0	0	0	0	0	0	0	0	0	0	0.000369153	0	0.000553729	0	0	0
6134-CEM-1099	0	0	0	0	0	0	0	0	0	0.000169628	0	0	0	0	0	0	0	0	0	0.000275646	0	0	0	0	0
6134-CEM-1100	0	0	0	0	0	0	0	0	0	0	0	0	0	0	0	0	0	0	0	4.12164e-05	0	0	0	0	0
6134-CEM-1101	0	0	0	0	0	0	0	0	0	0	0	0	0	0	0	0	0	0	0	0	0	0	0	0	0
6134-CEM-1102	0	0	0	0	0	0	0	0	0	0	0	0	0	0	0	0	0	0	0	0	0	0	0	0	0
6134-CEM-1103	0	0	0	0	0	0	0	0	0	0	0	0	0	0	0	0	0	0	0	0	0	0	0	0	0
6134-CEM-1104	0	0	0	0	0	0	0	0	0	0	0	0	0	0	0	0	0	0	0	0	0	0	0	0	0
6134-CEM-1105	0	0	0	0	0	0	0	0	0	0	0	0	0	0	0	0	0	0	0	0	0	0	0	0	0
6134-CEM-1106	0	0	0	0	0	0	0	0	0	0	0	0	0	0	0	0	0	0	0	0.000401515	0	0	0	0	0
6134-CEM-1107	0	0	0	0	0	0	0	0	0	0	0	0	0	0	0	0	0	0	0	0	0	0	0	0	0
6134-CEM-1108	0	0	0	0	0	0	0	0	0	0	0	0	0	0	0	0	0	0	0	0.000322898	0	0	0	0	0
6134-CEM-1109	0	0	0	0	0	0	0	0	0	0	0	0	0	0	0	0	0	0	0	0	0	0	0	0	0
6134-CEM-1110	0	0	0	0	0	0	0	0	0	0	0	0	0	0	0	0	0	0	0	0	0	0	0	0	0
6134-CEM-1111	0	0	0	0	0	0	0	0	0	0	0	0	0	0	0	0	0	0	0	0	0	0	0	0	0
6134-CEM-1113	0	0	0	0	0	0	0	0	0	0	0	0	0	0	0	0	0	0	0	0	0	0	0	0	0
6134-CEM-1114	0	0	0	0	0	0	0	0	0	0	0	0	0	0	0	0	0	0	0	0	0	0	0	0	0
6134-CEM-1115	0	0	0	0	0	0	0	0	0	0	0	0	0	0	0	0	0	0	0	0.0292272	0	0	0	0	0
6134-CEM-1117	0	0	0	0	0	0	0	0	0	0	0	0	0	0	0	0	0	0	0	0	0	0	0	0	0
6134-CEM-1118	0	0	0	0	0	0	0	0	0	0	0	0	0	0	0	0	0	0	0	0	0	0	0	0	0
6134-CEM-1119	0	0	0	0	0.00151108	0	0	0	0	0	0	0	0	0	0	0	0	0	0	0	0	0	0	0	0
6134-CEM-1120	0	0	0	0	0	0	0	0	0	0	0	0	0	0	0	0	0	0	0	0	0	0	0	0	0
6134-CEM-1121	0	0	0	0	0	0	0	0	0	0	0	0	0	0	0	0	0	0	0	0	0	0	0	0	0
6134-CEM-1122	0	0	0	0	0	0	0	0	0	0	0	0	0	0	0	0	0	0	0	0	0	0	0	0	0
6134-CEM-1123	0	0	0	0	0	0	0	0	0	0	0	0	0	0	0	0	0	0	0	0	0	0	0	0	0
6134-CEM-1124	0	0	0	0	0	0	0	0	0	0	0	0	0	0	0	0	0	0	0	0	0	0	0	0	0
6134-CEM-1125	0	0	0	0	0	0	0	0	0	0	0	0	0	0	0	0	0	0	0	0	0	0	0	0	0
6134-CEM-1126	0	0	0	0	0	0	0	0	0	0	0	0	0	0	0	0	0	0	0	0	0	0	0	0	0
6134-CEM-1127	0	0	0	0	0	0	0	0	0	0	0	0	0	0	0	0	0	0	0	0	0	0	0	0	0
6134-CEM-1128	0	0	0	0	0	0	0	0	0	0	0	0	0	0	0	0	0	0	0	0	0	0	0	0	0
6134-CEM-1129	0	0	0	0	0	0	0	0	0	0	0	0	0	0	0	0	0	0	0	0	0	0	0	0	0
6134-CEM-1130	0	0	0	0	0	0	0	0	0	0	0	0	0	0	0	0	0	0	0	0	0	0	0	0	0
6134-CEM-1132	0	0	0	0	0	0	0	0	0	0	0	0	0	0	0	0	0	0	0	0	0	0	0	0	0
6134-CEM-1133	0	0	0	0	0	0	0	0	0	0	0	0	0	0	0	0	0	0	0	0	0	0	0	0	0
6134-CEM-1134	0	0	0	0	0	0	0	0	0	0	0	0	0	0	0	0	0	0	0	0	0	0	0	0	0
6134-CEM-1135	0	0	0	0	0	0	0	0	0	0	0	0	0	0	0	0	0	0	0	0	0	0	0	0	0
6134-CEM-1137	0	0	0	0	0	0	0	0	0	0	0	0	0	0	0	0	0	0	0	0	0	0	0	0	0
6134-CEM-1138	0	0	0	0	0	0	0	0	0	0	0	0	0	0	0	0	0	0	0	0	0	0	0	0	0
6134-CEM-1139	0	0	0	0	0	0	0	0	0	0	0	0	0.000795728	0	0	0	0	0	0	0.00120406	0	0	0	0	0
6134-CEM-1140	0	0	0	0	0	0	0	0	0	6.28737e-05	0	0	0	0	0	0	0	0	0	0.00011946	0	0	0	0	0
6134-CEM-1141	0	0	0	0	0	0	0	0	0	0	0	0	0	0	0	0	0	0	0	0	0	0	0	0	0
6134-CEM-1142	0	0	0	0	0	0	0	0	0	0	0	0	0	0	0	0	0	0	0	0	0	0	0	0	0
6134-CEM-1143	0	0	0	0	0	0	0	0	0	0	0	0	0	0	0	0	0	0	0	0	0	0	0	0	0
6134-CEM-1144	0	0	0	0	0	0	0	0	0	0	0	0	0	0	0	0	0	0	0	0	0	0	0	0	0
6134-CEM-1145	0	0	0	0	0	0	0	0	0	0	0	0	0	0	0	0	0	0	0	0	0	0	0	0	0
6134-CEM-1146	0	0	0	0	0	0	0	0	0	0	0	0	0	0	0	0	0	0	0	0.00134501	0	0	0	0	0
6134-CEM-1147	0	0	0	0	0	0	0	0	0	0	0	0	0	0	0	0	0.000523443	0	0	0.000423739	0	0	0	0	0
6134-CEM-1148	0	0	0	0	0	0	0	0	0	0.00010882	0	0	0	0	0	0	0	0	0	0.0199382	0	0	0	0	0
6134-CEM-1149	0	0	0	0	0	0	0	0	0	0	0	0	0	0	0	0	0	0	0	0	0	0	0	0	0
6134-CEM-1150	0	0	0	0	0	0	0	0	0	0	0	0	0	0	0	0	0	0	0	0	0	0	0	0	0
6134-CEM-1151	0	0	0	0	0	0	0	0	0	0	0	0	0	0	0	0	0	0	0	0	0	0	0	0	0
6134-CEM-1152	0	0	0	0	0	0	0	0	0	0	0	0	0	0	0	0	0.000386403	0	0	0	0	0	0	0	0
6134-CEM-1153	0	0	0	0	0	0	0	0	0	0	0	0	0	0	0	0	0	0	0	0	0	0	0	0	0
6134-CEM-1154	0	0	0	0	0	0	0	0	0	0	0	0	0	0	0	0	0	0	0	0.000173966	0	0	0	0	0
6134-CEM-1155	0	0	0	0	0	0	0	0	0	0	0	0	0	0	0	0	0	0	0	0	0	0	0	0	0
6134-CEM-1156	0	0	0	0	0	0	0	0	5.39292e-05	0	0	0	0	0	0	0	0	0	0	0.00133924	0	0	0	0	0
6134-CEM-1157	0	0	0	0	0	0	0	0	0	0	0	0	0	0	0	0	0	0	0	0	0	0	0	0	0
6134-CEM-1158	0	0	0	0	0	0	0	0	0	0	0	0	0	0	0	0	0	0	0	0	0	0	0	0	0
6134-CEM-1159	0	0	0	0	0	0	0	0	0	0	0	0	0	0	0	0	0	0	0	0	0	0	0	0	0
6134-CEM-1160	0	0	0	0	0	0	0	0	0	0	0	0	0	0	0	0	0	0	0	0	0	0	0	0	0
6134-CEM-1161	0	0	0	0	0	0	0	0	0	0	0	0	0	0	0	0	0	0	0	0	0	0	0	0	0
6134-CEM-1162	0	0	0	0	0	0	0	0	7.2422e-05	0	0	0	0	0	0	0	0	0	0	0	0	0	0	0	0
6134-CEM-1163	0	0	0	0	0	0	0	0	0	0	0	0	0	0	0	0	0	0	0	0.000188966	0	0	0	0	0
6134-CEM-1164	0	0	0	0	0	0	0	0	0	0	0	0	0	0	0	0	0	0	0	0.00049456	0	0	0	0	0
6134-CEM-1165	0	0	0	0	0	0	0	0	0.000172079	0	0	0	0	8.28527e-05	0	0	0.000165705	0	0	0.00280424	0	0	0	0	0
6134-CEM-1166	0	0	0	0	0	0	0	0	0	0	0	0	0	0	0	0	0	0	0	0.00237439	0	0	0	0	0
6134-CEM-1167	0	0	0	0	0	0	0	0	0	0	0	0	0	0	0	0	0	0	0.000410458	0.00829507	0	0	0	0	0
6134-CEM-1168	0	0	0	0	0	0	0	0	0	0	0	0	0	0	0	0	0	0	0.000159415	0.00306076	0	0	0	0	0
6134-CEM-1169	0	0	0	0	0	0	0	0	0	0	0	0	0	0	0	0	0	0	0	0.00836375	0	0	0	0	0
6134-CEM-1170	0	0	0	0	0	0	0	0	0	0	0	0	0	0	0	0	0	0	0	0.00186862	0	0	0	0	0
6134-CEM-1171	0	0	0	0	0	0	0	0	0	0	0	0	0	0	0	0	0	0	0	0.00627164	0	0	0	0	0
6134-CEM-1172	0	0	0	0	0	0	0	0	0	0	0	0	0	0	0	0	0	0	0	0.00630238	0	0	0	0	0.000264047
6134-CEM-1173	0	0	0	0	0	0	0	0	0	0	0	0	0.000122579	0	0	0	0	0	0	0.00153632	0	0	0	0	0
6134-CEM-1174	0	0	0	0	0	0	0	0	0	0	0	0	0	0	0	0	0	0	0	0.00116686	0	0	0	0	0
6134-CEM-1176	0	0	0	0	0	0	0	0	0	0	0	0	0	0	0	0	0	0	0.000311913	0.00589515	0	0	0	0	0
BC-0247284139	0.00030319	0	0	0	0	0	0	0	0	0	0	0	0	0	0	0	0	0	0	0.570667	0	0	0	0	0
BC-0247284151	0	0	0	0	0	0	0	0	0	0	0	0	0	0	0	0	0	0	0	0	0	0	0	0	0
BC-0247290208	0	0	0	0	0	0	0	0	0	0	0	0	0	0	0	0	0	0	0	0	0	0	0	0	0
BC-0247290436	0	0	0	0	0	0	0	0	0	0	0	0	0	0	0	0	0	0	0	0	0	0	0	0	0
BC-0247292208	0	0	0	0	0	0	0	0	0	0	0	0	0	0	0	0	0	0	0	0.000372492	0	0	0	0	0
BC-0247292798	0	0	0	0	0	0	0	0	0	0	0	0	0	0	0	0	0	0	0	7.94947e-05	0	0	0	0	0
BC-0247292800	0	0	0	0	0	0	0	0	0	0	0	0	0	0	0	0	0	0	0	0	0	0	0	0	0
BC-0247293195	0	0	0	0	0	0	0	0	0	0	0	0	0	0	0	0	0	0	0	0	0	0	0	0	0
BC-0247293332	0.00026133	0	0	0	0	0	0	0	0	0	0	0	0	0	0	0	0	0	1.69695e-05	0.910203	0	0	0	0	0
BC-0247293402	0	0	0	0	0	0	0	0	0	0	0	0	0	0	0	0	0	0	0	0.000127096	0	0	0	0	0
BC-0247293598	0.000256362	0	0	0	0	0	0	0	0	0	0	0	0	0	0	0	0	0	1.78029e-05	0.924233	0	0	0	0	0
BC-0247293836	0	0	0	0	0	0	0	0	0	0	0	0	0	0	0	0	0	0	0	0	0	0	0	0	0
BC-0247294223	0.000361149	0	0	0	0	0	1.23951e-05	0	7.26805e-05	0	1.57756e-05	0	0	0	0	0	0	0	0	0.949893	0	0	0	0	0
BC-0247294385	0	0	0	0	0	0	0	0	0	0	0	0	0	0	0	0	0	0	0	0	0	0	0	0	0
BC-0247295148	0	0	0	0	0	0	0	0	0	0	0	0	0	0	0	0	0	0	0	0	0	0	0	0	0
BC-0302366298	0	0	0	0	0	0	0	0	0	0	0	0	0	0	0	0	0	0	0	0.0407701	0	0	0	0	0
BC-0302366368	0	0	0	0	0	0	0	0	0	0	0	0	0	0	0	0	0	0	0	0.0254958	0	0	0	0	0
BC-0302366650	0	0	0	0	0	0	0	0	0	0	0	0	0	0	0	0	0	0	0	0.0351082	0	0	0	0	0
BC-0302368124	0	0	0	0	0	0	0	0	0	0	0	0	0	0	0	0	0	0	0	0.0061115	0	0	0	0	0
BC-0302372746	0.000285067	0	0	0	0	0	0	0	8.72533e-05	0	0	0	0	0	0	0	0	0	2.80884e-05	0.951715	0	0	0	0	0
BC-0302375695	0	0	0	0	0	0	0	0	0	0	0	0	0	0	0	0	0	0	0	0	0	0	0	0	0
BC-0302375699	0	0	0	0	0	0	0	0	0	0	0	0	0	0	0	0	0	0	0	0	0	0	0	0	0
BC-0302382673	0.00038704	0	0	0	0	0	0	0	0	0	0	0	0	0	0	0	0	0	1.34438e-05	0.942637	0	0	0	0	0
BC-0302384150	0.000177328	0	0	0	0	0	0	0	0	0	0	0	0	0	0	0	0	0	0	0.361039	0	0	0	0	0
BC-0302384160	0	0	0	0	0	0	0	0	0	0	0	0	0	0	0	0	0	0	0	0	0	0	0	0	0
BC-0302384208	0.000190097	0	0	0	0	0	0	0	3.52032e-05	0	0	0	0	0	0	0	0	0	0	0.621604	0	0	0	0	0
BC-0302384323	0	0	0	0	0	0	0	0	0	0	0	0	0	0	0	0	0	0	0	0	0	0	0	0	0
BC-0302384770	0	0	0	0	0	0	0	0	0	0	0	0	0	0	0	0	0	0	0	0	0	0	0	0	0
BC-0302385148	0	0	0	0	0	0	0	0	0	0	0	0	0	0	0	0	0	0	0	0	0	0	0	0	0
BC-0302385192	0	0	0	0	0	0	0	0	0	0	0	0	0	0	0	0	0	0	0	0	0	0	0	0	0
BC-0302385563	8.61446e-05	0	0	0	0	0	0	0	0	0	0	0	0	0	0	0	0	0	0	0.181129	0	0	0	0	0
BC-0302385564	0	0	0	0	0	0	0	0	0	0	0	0	0	0	0	0	0	0	0	0	0	0	0	0	0
BC-0302386225	0	0	0	0	0	0	0	0	0	0	0	0	0	0	0	0	0	0	0	0	0	0	0	0	0
BC-0302386425	0.000260751	0	0	0	0	0	0	0	5.77285e-05	0	0	0	0	0	0	0	0	0	0	0.945257	0	0	0	0	0
BC-0302386497	0.000257677	0	0	0	0	0	0	0	4.27587e-05	0	0	0	0	0	0	0	0	0	0	0.956508	0	0	0	0	0
BC-0302389496	0	0	0	0	0	0	0	0	0	0	0	0	0	0	0	0	0	0	0	4.53347e-05	0	0	0	0	0
BC-0302391435	0	0	0	0	0	0	0	0	0	1.07017e-05	0	0	0	0	0	0	0	0	0	0	0	0	0	0	0
BC-0302396242	0	0	0	0	0	0	0	0	0	0	0	0	0	0	0	0	0	0	0	0	0	0	0	0	0
BC-0302396250	0	0	0	0	0	0	0	0	0	0	0	0	0	0	0	0	0	0	0	0	0	0	0	0	0
BC-0302396692	0.00019854	0	0	0	0	0	0	0	0	0	0	0	0	0	0	0	0	0	0	0.477509	0	0	0	0	0
BC-0302402878	0	0	0	0	0	0	0	0	0	0	0	0	0	0	0	0	0	0	0	0	0	0	0	0	0
BC-0302403564	0	0	0	0	0	0	0	0	0	0	0	0	0	0	0	0	0	0	0	0	0	0	0	0	0
BC-0302406558	0	0	0	0	0	0	0	0	0	0	0	0	0	0	0	0	0	0	0	0	0	0	0	0	0
BC-0302406874	0	0	0	0	0	0	0	0	0	0	0	0	0	0	0	0	0	0	0	0	0	0	0	0	0
BC-0302407946	0	0	0	0	0	0	0	0	0	0	0	0	0	0	0	0	0	0	0	0	0	0	0	0	0
BC-0302408155	0	0	0	0	0	0	0	0	0	0	0	0	0	0	0	0	0	0	0	0.000784627	0	0	0	0	0
BC-0302408226	0	0	0	0	0	0	0	0	0	0	0	0	0	0	0	0	0	0	0	0	0	0	0	0	0
BC-0302409392	0	0	0	0	0	0	0	0	0	0	0	0	0	0	0	0	0	0	0	0	0	0	0	0	0
BC-0302409422	0	0	0	0	0	0	0	0	0	0	0	0	0	0	0	0	0	0	0	0	0	0	0	0	0
BC-0302409434	0.000472443	0	0	0	0	0	0	0	4.00053e-05	0	0	0	0	0	0	0	0	0	5.14353e-05	0.797966	0	0	0	0	0
BC-0302409457	0.000303083	0	0	0	0	0	0	0	0	0	0	0	0	0	0	0	0	0	0	0.443227	0	0	0	0	0
BC-0302409459	0	0	0	0	0	0	0	0	0	0	0	0	0	0	4.44124e-05	0	0	0	0	6.0274e-05	0	0	0	0	0
BC-0302409575	0	0	0	0	0	0	0	0	0	0	0	0	0	0	0	0	0	0	0	0	0	0	0	0	0
BC-0302409618	0	0	0	0	0	0	0	0	0	0	0	0	0	0	0	0	0	0	0	0	0	0	0	0	0
BC-0302410057	0	0	0	0	0	0	0	0	0	0	0	0	0	0	0	0	0	0	0	0	0	0	0	0	0
BC-0302410119	0	0	0	0	0	0	0	0	0	0	0	0	0	0	0	0	0	0	0	0	0	0	0	0	0
BC-0302410205	0	0	0	0	0	0	0	0	0	0	0	0	0	0	0	0	0	0	0	0.000300054	0	0	0	0	0
BC-0302410212	0	0	0	0	0	0	0	0	0	0	0	0	0	0	0	0	0	0	0	5.90472e-05	0	4.59256e-05	0	0	0
BC-0302410476	0	0	0	0	0	0	0	0	0	0	0	0	0	0	0	0	0	0	0	0	0	0	0	0	0
BC-0302410490	0	0	0	0	0	0	0	0	0	0	0	0	0	0	8.35003e-05	0	0	0	0	0.000111334	0	0	0	0	0
BC-0302410517	0	0	0	0	0	0	0	0	0	0	0	0	0	0	0	0	0	0	0	0	0	0	0	0	0
BC-0302410523	0	0	0	0	0	0	0	0	0	0	0	0	0	0	0.000313884	0	0	0	0	0.000479085	0	0	0	0	0
BC-0302410532	0	0	0	0	0	0	0	0	0	0	0	0	0	0	0	0	0	0	0	0	0	0	0	0	0
BC-0302410747	0	0	0	0	0	0	0	0	0	0	0	0	0	0	0	0	0	0	0	0	0	0	0	0	0
BC-0302410755	0	0	0	0	0	0	0	0	0	0	0	0	0	0	0.00014872	0	0	0	0	0.000142523	0	0	0	0	0
BC-0302410758	0	0	0	0	0	0	0	0	0	0	0	0	0	0	0	0	0	0	0	0.000608174	0	0	0	0	0
BC-0302410770	0	0	0	0	0	0	0	0	0	0	0	0	0	0	0	0	0	0	0	0	0	0	0	0	0
BC-0302410781	0	0	0	0	0	0	0	0	0	0	0	0	0	0	0	0	0	0	0	3.96363e-05	0	0	0	0	0
BC-0302410801	0	0	0	0	0	0	0	0	0	0	0	0	0	0	0	0	0	0	0	0	0	0	0	0	0
BC-0302410805	0	0	0	0	0	0	0	0	0	0	0	0	0	0	0	0	0	0	0	0	0	0	0	0	0
BC-0302410808	0	0	0	0	0	0	0	0	0	0	0	0	0	0	0	0	0	0	0	0.00014834	0	0	0	0	0
BC-0302410809	0	0	0	0	0	0	0	0	0	0	0	0	0	0	0	0	0	0	0	0.00128072	0	0	0	0	0
BC-0302410944	0	0	0	0	0	0	0	0	0	0	0	0	0	0	2.56216e-05	0	0	0	0	2.81837e-05	0	0	0	0	0
BC-0302411025	0	0	0	0	0	0	0	0	0	0	0	0	0	0	0	0	0	0	0	0.000127882	0	0	0	0	0
BC-0302411034	0	0	0	0	0	0	0	0	0	0	0	0	0	0	0	0	0.000209729	0	0	0	0	0	0	0	0
BC-0302411039	0	0	0	0	0	0	0	0	0	0	0	0	0	0	0	0	0	0	0	0	0	0	0	0	0
BC-0302411041	0	0	0	0	0	0	0	0	0	0	0	0	0	0	0	0	0	0	0	0	0	0	0	0	0
BC-0302411048	0	0	0	0	0	0	0	0	0	0	0	0	0	0	0	0	0	0	0	0	0	0	0	0	0
BC-0302411054	0	0	0	0	0	0	0	0	0	0	0	0	0	0	0	0	0	0	0	0.00027685	0	0	0	0	0
BC-0302411064	0	0	0	0	0	0	0	0	0	0	0	0	0	0	0	0	0	0	0	0	0	0	0	0	0
BC-0302411065	0	0	0	0	0	0	0	0	0	0	0	0	0	0	0	0	0	0	0	8.73876e-05	0	0	0	0	0
BC-0302411068	0	0	0	0	0	0	0	0	0	0	0	0	0.000199305	0	0	0	0	0	0	0	0	0	0	0	0
BC-0302411072	0	0	0	0	0	0	0	0	0	0	0	0	0	0	0	0	0	0	0	0.000187248	0	0	0	0	0
BC-0302411076	0	0	0	0	0	0	0	0	0	0	0	0	0	0	0	0	0	0	0	0	0	0	0	0	0
BC-0302411080	0	0	0	0	0	0	0	0	0	0	0	0	0	0	0	0	0	0	0	0	0	0	0	0	0
BC-0302411084	0	0	0	0	0	0	0	0	0	0	0	0	0	0	0	0	0	0	0	0	0	0	0	0	0
BC-0302411096	0	0	0	0	0	0	0	0	0	0	0	0	0	0	0	0	0	0	0	0	0	0	0	0	0
BC-0302411097	0	0	0	0	0	0	0	0	0	0	0	0	0	0	0	0	0	0	0	0	0	0	0	0	0
BC-0302411104	0	0	0	0	0	0	0	0	0	0	0	0	0	0	0	0	0	0	0	0	0	0	0	0	0
BC-0302411105	0	0	0	0	0	0	0	0	0	0	0	0	0	0	0	0	0	0	0	0.000511601	0	0	0	0	0
BC-0302411223	0	0	0	0	0	0	0	0	0	0	0	0	0	0	0	0	0	0	0	0	0	0	0	0	0
BC-0302411266	0	0	0	0	0	0	0	0	0	0	0	0	0	0	9.8342e-05	0	0	0	0	0	0	0	0	0	0
BC-0302411294	0	0	0	0	0	0	0	0	0	0	0	0	0	0	0	0	0	0	0	0	0	0	0	0	0
BC-0302411302	0	0	0	0	0	0	0	0	0	0	0	0	0	0	0	0	0	0	0	0	0	0	0	0	0
BC-0302411303	0	0	0	0	0	0	0	0	0	0	0	0	0	0	0	0	0	0	0	0	0	0	0	0	0
BC-0302411310	0	0	0	0	0	0	0	0	0	0	0	0	0	0	0	0	0	0	0	0	0	0	0	0	0
BC-0302411344	0	0	0	0	0	0	0	0	0	0	0	0	0	0	0	0	0	0	0	0	0	0	0	0	0
BC-0302411445	0	0	0	0	0	0	0	0	0	0	0	0	0	0	0	0	0	0	0	0.000147523	0	0	0	0	0
BC-0302411522	0	0	0	0	0	0	0	0	0	0	0	0	0	0	0	0	0	0	0	2.94796e-05	0	0	0	0	0
BC-0302411543	0	0	0	0	0	0	0	0	0	0	0	0	0	0	0	0	0	0	0	0.00100053	0	0	0	0	0
BC-0302411552	0	0	0	0	0	0	0	0	0	0	0	0	0	0	3.47896e-05	0	0	0	0	4.2818e-05	0	0	0	0	0
BC-0302411554	0	0	0	0	0	0	0	0	0	0	0	0	0	0	0	0	0	0	0	0	0	0	0	0	0
BC-0302411570	0	0	0	0	0	0	0	0	0	0	0	0	0	0	0	0	0	0	0	0	0	0	0	0	0
BC-0302411580	0	0	0	0	0	0	0	0	0	0	0	0	0	0	0	0	0	0	0	8.85442e-05	0	0	0	0	0
BC-0302411589	0	0	0	0	0	0	0	0	0	0	0	0	0	0	0	0	0	0	0	0	0	0	0	0	0
BC-0302411788	0	0	1.64786e-06	0	0	0	0	0	0	0	0	0	0	0	0	0	0	0	0	0.992651	0	0	0	0	0
BC-0302411830	0	0	0	0	0	0	0	0	0	0	0	0	0	0	0.000169961	0	0	0	0	0	0	0	0	0	0
BC-0302411841	0	0	0	0	0	0	0	0	0	0	0	0	0	0	0.000212816	0	0	0	0	0	0	0	0	0	0
BC-0302411872	0	0	0	0	0	0	0	0	0	0	0	0	0	0	6.96961e-05	0	0	0	0	0.00020328	0	0	0	0	0
BC-0302411919	0	0	0	0	0	0	0	0	0	0	0	0	0	0	0	0.000142835	0	0	0	0	0	0	0	0	0
BC-0302412756	0	0	0	0	0	0	0	0	0	0	0	0	0	0	0	0	0	0	0	0	0	0	0	0	0
BC-0302412843	0	0	0	0	0	0	0	0	0	0	0	0	0	0	0.000107299	0	0	0	0	0	0	0	0	0	0
BC-0302412853	0	0	0	0	0	0	0	0	0	0	0	0	0	0	0	0	0	0	0	7.5173e-05	0	0	0	0	0
BC-0302412855	0	0	0	0	0	0	0	0	0	0	0	0	0	0	0	0	0	0	0	0	0	0	0	0	0
BC-0302412858	0	0	0	0	0	0	0	0	0	0	0	0	0	0	0	0	0	0	0	0.000182149	0	0	0	0	0
BC-0302412862	0	0	0	0	0	0	0	0	0	0	0	0	0	0	0	0	0	0	0	0	0	0	0	0	0
BC-0302412865	0	0	0	0	0	0	0	0	0	0	0	0	0	0	0	0	0	0	0	0	0	0	0	0	0
BC-0302412880	0	0	0	0	0	0	0	0	0	0	0	0	0	0	0	0	0	0	0	0	0	0	0	0	0
BC-0302412883	0	0	0	0	0	0	0	0	0	0	0	0	0	0	0	0	0	0	0	0.156458	0	0	0	0	0
BC-0302412896	0	0	0	0	0	0	0	0	0	0	0	0	0	0	0	0	0	0	0	0	0	0	0	0	0
BC-0302412897	0	0	0	0	0	0	0	0	0	0.000178423	0	0	0	0	0	0	0	0	0	0.000309266	0	0	0	0	0
BC-0302412918	0	0	0	0	0	0	0	0	0	0	0	0	0	0	0	0	0	0	0	0	0	0	0	0	0
BC-0302412931	0	0	0	0	0	0	0	0	0	0.000101066	0	0	0	0	0	0	0	0	0	0.000220507	0	0	0	0	0
BC-0302412935	0	0	0	0	0	0	0	0	0	0	0	0	0	0	0.000120115	0	0	0	0	0	0	0	0	0	0
BC-0302413047	0	0	0	0	0.000199098	0	0	0	0	0	0	0	0	0	0	0	0	0	0	0.000983779	0	0	0	0	0
BC-0302413048	0	0	0	0	0	0	0	0	0	0	0	0	0	0	0	0	0	0	0	0.994849	0	0	0	0	0
BC-0302413057	0	0	0	0	0	0	0	0	0	0	0	0	0	0	0	0	0	0	0	0	0	0	0	0	0
BC-0302413061	0	0	0	0	0	0	0	0	0	0	0	0	0	0	0	0	0	0	0	0.000128587	0	0	0	0	0
BC-0302413065	0	0	0	0	0	0	0	0	0	0	0	0	0	0	0	0	0	0	0	0.00031696	0	0	0	0	0
BC-0302413066	0	0	0	0	0	0	0	0	0	0	0	0	0	0	2.86405e-05	0	0	0	0	0	0	0	0	0	0
BC-0302413079	0	0	0	0	0	0	0	0	0	0	0	0	0	0	0	0	0	0	0	9.37119e-05	0	0	0	0	0
BC-0302413099	0	0	0	0	0	0	0	0	0	0	0	0	0	0	0	0	0	0	0	0.000113322	0	0	0	0	0
BC-0302413101	0	0	0	0	0	0	0	0	0	0	0	0	0	0	0	0	0	0	0	1.31373e-05	0	0	0	0	0
BC-0302413102	0	0	0	0	0	0	0	0	0	0	0	0	0	0	0	0	0	0	0	0	0	0	0	0	0
BC-0302413124	0	0	0	0	0	0	0	0	0	0	0	0	0	0	0	0	0	0	0	0	0	0	0	0	0
BC-0302413523	0	0	0	0	0	0	0	0	0	0	0	0	0	0	0	0	0	0	0	0	0	0	0	0	0
BC-0302413525	0	0	0	0	0	4.60248e-05	0	0	0	0	0	0	0	0	0	0	0	0	0	0	0	0	0	0	0
BC-0302413538	0	0	0	0	0	0	0	0	0	0	0	0	0	0	0	0	0	0	0	0	0	0	0	0	0
BC-0302413540	0	0	0	0	0	0	0	0	0	5.9094e-05	0	0	0	0	0	0	0	0	0	0	0	0	0	0	0
BC-0302413542	0	0	0	0	0	0	0	0	0	0	0	0	0	0	0	0	0	0	0	0	0	0	0	0	0
BC-0302413546	0	0	0	0	0	0	0	0	0	0	0	0	0	0	0	0	0	0	0	0	0	0	0	0	0
BC-0302413555	0	0	0	0	0	0	0	0	0	0	0	0	0	0	0	0	0	0	0	0	0	0	0	0	0
BC-0302413570	0	0	0	0	0	0	0	0	0	0	0	0	0	0	0	0	0	0	0	0	0	0	0	0	0
BC-0302413588	0	0	0	0	0	0	0	0	0	0	0	0	0	0	0	0	0	0	0	0	0	0	0	0	0
BC-0302413675	0	0	0	0	0	0	0	0	0	0	0	0	0	0	0	0	0	0	0	0	0	0	0	0	0
BC-0302413687	0	0	0	0	0	0	0	0	0	0	0	0	0	0	0	0	0	0	0	0	0	0	0	0	0
BC-0302413911	0	0	0	0	0	0	0	0	0	0	0	0	0	0	0	0	0	0	0	0.000631006	0	0	0	0	0
BC-0302413915	0	0	0	0	0	0	0	0	0	0	0	0	0	0	0	0	0	0	0	0	0	0	0	0	0
BC-0302413918	0	0	0	0	0	0	0	0	0	3.48747e-05	0	0	0	0	0	0	0	0	0	0	0	0	0	0	0
BC-0302413923	0.000139232	0	0	0	0	0	0	0	0	0	0	0	0	0	0	0	0	0	0	0.592145	0	0	0	0	0
BC-0302413927	0.000202497	0	0	0	0	0	0.000182247	0	0	0	0	0	0	0	0	0	0	0	0	0	0	0	0	0	0
BC-0302413933	0	0	0	0	0	0	0	0	0	0	0	0	0	0	0	0	0	0	0	0.000746785	0	0	0	0	0
BC-0302413943	0	0	0	0	0	0	0	0	0	0	0	0	0	0	0	0	0	0	0	0	0	0	0	0	0
BC-0302413948	0	0	0	0	0	0	0	0	0	0	0	0	0	0	0	0	0	0	0	0.00015294	0	0	0	0	0
BC-0302413956	0	0	0	0	0	0	0	0	0	0	0	0	0	0	0	0	0	0	0	0	0	0	0	0	0
BC-0302413986	0	0	0	0	0	0	0	0	0	0	0	0	0	0	0	0	0	0	0	0.000758443	0	0	0	0	0
BC-0302413988	0	0	0	0	0	0	0	0	0	0	0	0	0	0	0	0	0	0	0	0	0	0	0	0	0
BC-0302413993	0	0	0	0	0	0	0	0	0	0	0	0	0	0	0	0	0	0	0	0	0	0	0	0	0
BC-0302414954	0	0	0	0	0	0	0	0	0	0	0	0	0	0	0	0	0	0	0	0	0	0	0	0	0
BC-0302415032	0	0	0	0	0	0	0	0	0	0	0	0	0	0	0	0	0	0	0	0	0	0	0	0	0
BC-0302415036	0	0	0	0	0	0	0	0	0	0	0	0	0	0	0	0	0	0	0	0	0	0	0	0	0
BC-0302415048	0	0	0	0	0	0	0	0	0	0	0	0	0	0	0	0	0	0	0	0	0	0	0	0	0
BC-0302415808	0	0	0	0	0	0	0	0	0	0	0	0	0	0	0	0	0	0	0	0	0	0	0	0	0
BC-0302415877	0	0	0	0	0	0	0	0	0	0.000388152	0	0	0	0	0	0	0	0	0	0	0	0	0	0	0
BC-0302416013	0	0	0	0	0	0	0	0	0	0	0	0	0	0	0	0	0	0	0	0.00125948	0	0	0	0	0
BC-0302416022	0	0	0	0	0	0	0	0	0	0	0	0	0	0	0	0	0	0	0	0	0	0	0	0	0
BC-0302416039	0	0	0	0	0	0	0	0	0	0	0	0	0	0	0	0	0.000837892	0	0	0	0	0	0	0	0
BC-0302416063	0	0	0	0	0	0	0	0	0	0	0	0	0	0	0	0	0	0	0	0	0	0	0	0	0
BC-0302416064	0	0	0	0	0	0	0	0	0	0	0	0	0	0	0	0	0	0	0	0	0	0	0	0	0
BC-0302416070	0	0	0	0	0	0	0	0	0	0	0	0	0	0	0	0	0	0	0	0	0	0	0	0	0
BC-0302416103	0	0	0	0	0	0	0	0	0	0	0	0	0	0	0	0	0	0	0	0	0	0	0	0	0
BC-0302416226	0	0	0	0	0	0	0	0	0	0	0	0	0	0	0	0	0	0	0	0	0	0	0	0	0
BC-0302416249	0	0	0	0	0	0	0	0	0	0	0	0	0	0	0	0	0	0	0	0	0	0	0	0	0
BC-0302416291	0	0	0	0	0	0	0	0	0	0	0	0	0	0	0	0	0	0	0	0	0	0	0	0	0
BC-0302416293	0	0	0	0	0	0	0	0	0	0	0	0	0	0	0	0	0	0	0	0	0	0	0	0	0
BC-0302416402	0	0	0	0	0	0	0	0	0	0	0	0	0	0	0	0	0	0	0	0	0	0	0	0	0
BC-0302416435	0	0	0	0	0	0	0	0	0	0	0	0	0	0	0	0	0	0	0	0	0	0	0	0	0
BC-0302416459	0	0	0	0	0	0	0	0	0	0	0	0	0	0	0	0	0	0	0	0	0	0	0	0	0
BC-0302416460	0	0	0	0	0	0	0	0	0	0	0	0	0	0	0	0	0	0	0	0	0	0	0	0	0
BC-0302416464	0	0	0	0	0	0	0	0	0	0	0	0	0	0	0	0	0	0	0	0	0	0	0	0	0
BC-0302416467	0	0	0	0	0	0	0	0	0	0	0	0	0	0	0	0	0	0	0	0	0	0	0	0	0
BC-0302417215	0	0	0	0	0	0	0	0	0	0	0	0	0	0	0	0	0	0	0	0	0	0	0	0	0
BC-0302417220	0	0	0	0	0	0	0	0	0	0	0	0	0	0	0	0	0	0	0	0	0	0	0	0	0
BC-0302417253	0	0	0	0	0	0	0	0	0.0137297	0	0	0	0	0	0	0	0	0	0	0	0	0	0	0	0
BC-0302417267	0	0	0	0	0	0	0	0	0	0	0	0	0	0	0	0	0	0	0	0	0	0	0	0	0
BC-0302417269	0	0	0	0	0	0	0	0	0	0	0	0	0	0	0	0	0	0	0	0	0	0	0	0	0
BC-0302417379	0	0	0	0	0	0	0	0	0	0	0	0	0	0	0	0	0	0	0	0	0	0	0	0	0
BC-0302417410	0	0	0	0	0	0	0	0	0	0	0	0	0	0	0	0	0	0	0	0	0	0	0	0	0
BC-0302417425	0	0	0	0	0	0	0	0	0	0	0	0	0	0	0	0	0	0	0	0	0	0	0	0	0
BC-0302417440	0	0	0	0	0	0	0	0	0	0	0	0	0	0	0	0	0	0	0	0	0	0	0	0	0
BC-0302417447	0	0	0	0	0	0	0	0	0	0	0	0	0	0	0	0	0	0	0	0	0	0	0	0	0
BC-0302417550	0	0	0	0	0	0	0	0	0	0	0	0	0	0	0	0	0	0	0	0	0	0	0	0	0
BC-0302417562	0	0	0	0	0	0	0	0	0	0	0	0	0	0	0	0	0	0	0	0	0	0	0	0	0
BC-0302417612	0	0	0	0	0	0	0	0	0	0	0	0	0	0	0	0	0	0	0	0	0	0	0	0	0
BC-0302417617	0	0	0	0	0	0	0	0	0	5.50709e-05	0	0	0	0	0	0	0	0	0	0	0	0	0	0	0
BC-0302417627	0	0	0	0	0	0	0	0	0	0	0	0	0	0	0	0	0	0	0	0	0	0	0	0	0
BC-0302417640	0	0	0	0	0	0	0	0	0	0	0	0	0	0	0	0	0	0	0	0	0	0	0	0	0
BC-0302417954	0	0	0	0	0	0	0	0	0	0	0	0	0	0	0	0	0	0	0	0	0	0	0	0	0
BC-0302423214	0	0	0	0	0	0	0	0	0	0	0	0	0	0	0	0	0	0	0	0.00022006	0	0	0	0	0
BC-0306555265	0	0	0	0	0	0	0	0	0	0	0	0	0	0	0	0	0	0	0	0	0	0	0	0	0
BC-0306555270	0.000187651	0	0	0	0	0	0	0	0	0	0	0	0	0	0	0	0	0	5.00402e-05	0.603404	0	0	0	0	0
BC-0306555276	0	0	0	0	0	0	0	0.00107838	0	0	0	0	0	0	0	0	0	0	0	0	0	0	0	0	0
BC-0306555277	0	0	0	0	0	0	0	0	0	0	0	0	0	0	0	0	0	0	0	0	0	0	0	0	0
BC-0306555286	0	0	0	0	0	0	0	0	0	0	0	0	0	0	0	0	0	0	0	0	0	0	0	0	0
BC-0306555297	0	0	0	0	0	0	0	0	0	0	0	0	0	0	0	0	0	0	0	0	0	0	0	0	0
BC-0306555327	0.00025612	0	0	0	0	0	0	0	0	0	0	0	0	0	0	0	0	0	0	0.62462	0	0	0	0	0
BC-0306555980	0	0	0	0	0	0	0	0	0	0	0	0	0	0	0	0	0	0	0	0.0201734	0	0	0	0	0
BC-0306557680	0.000186671	0	0	0	0	0	0	0	0	0	0	0	0	0	0	0	0	0	0	0.575018	0	0	0	0	0
BC-0306557704	0	0	0	0	0	0	0	0	0	0	0	0	0	0	0	0	0	0	0	0	0	0	0	0	0
BC-0306557712	0	0	0	0	0	0	0	0	0	0	0	0	0	0	0	0	0	0	0	0	0	0	0	0	0
BC-0306557721	0	0	0	0	0	0	0	0	0	0	0	0	0	0	0	0	0	0	0	0	0	0	0	0	0
BC-0306557738	0	0	0	0	0	0	0	0	0	0	0	0	0	0	0	0	0	0	0	0	0	0	0	0	0
BC-0306557753	0.0003827	0	0	0	0	0	0	0	5.10267e-05	0	3.827e-05	0	0	0	0	0	0	0	0	0.824266	0	0	0	0	0
BC-0306557769	0.000358882	0	0	0	0	0	0	0	2.44138e-05	0	0	0	0	0	0	0	0	0	0	0.729454	0	0	0	0	0
BC-0306557815	0.000654722	0	0	0	0	0	1.67504e-05	0	0	0	0	0	0	0	0	0	0	0	0	0.950634	0	0	0	0	0
BC-0306557831	0	0	0	0	0	0	0	0	0	0	0	0	0	0	0	0	0	0	0	0	0	0	0	0	0
BC-0306557861	0.000264636	0	0	0	0	0	0	0	0	0	0	0	0	0	0	0	0	0	0	0.695293	0	0	0	0	0
BC-0306557870	0	0	0	0	0	0	0	0	0	0	0	0	0	0	0	0	0	0	0	0	0	0	0	0	0
BC-0306557875	0	0	0	0	0	0	0	0	0	0	0	0	0	0	0	0	0	0	0	0	0	0	0	0	0
BC-0306557890	0	0	0	0	0	0	0	0	0	0	0	0	0	0	0	0	0	0	0	0	0	0	0	0	0
BC-0306557896	0	0	0	0	0	0	0	0	0	0	0	0	0	0	0	0	0	0	0	0.215506	0	0	0	0	0
BC-0306557899	0	0	0	0	0	0	0	0	0	0	0	0	0	0	0	0	0	0	0	0	0	0	0	0	0
BC-0306557904	0.00024924	0	0	0	0	0	0	0	0	0	0	0	0	0	0	0	0	0	0	0.590805	0	0	0	0	0
BC-0306557909	0	0	0	0	0	0	0	0	0	0	0	0	0	0	0	0	0	0	0	0.112122	0	0	0	0	0
BC-0306557911	0	0	0	0	0	0	0	0	0	0	0	0	0	0	0	0	0	0	0	0.0893586	0	0	0	0	0
BC-0306557919	0	0	0	0	0	0	0	0	0	0	0	0	0	0	0	0	0	0	0	0	0	0	0	0	0
BC-0306558046	0	0	0	0	0	0	0	0	0	0	0	0	0	0	0	0	0	0	0	0	0	0	0	0	0
BC-0306558049	0	0	0	0	0	0	0	0	0	0	0	0	0	0	0	0	0	0	0	0	0	0	0	0	0
BC-0306558053	0	0	0	0	0	0	0	0	0	0	0	0	0	0	0	0	0	0	0	0	0	0	0	0	0
BC-0306558054	0	0	0	0	0	0	0	0	0	0	0	0	0	0	0	0	0	0	0	0	0	0	0	0	0
BC-0306558058	0	0	0	0	0	0	0	0	0	0	0	0	0	0	0	0	0	0	0	0	0	0	0	0	0
BC-0306558114	0	0	0	0	0	0	0	0	0	0	0	0	0	0	0	0	0	0	0	0	0	0	0	0	0
BC-0306558332	0	0	0	0	0	0	0	0	0	0	0	0	0	0	0	0	0	0	0	0	0	0	0	0	0
BC-0306558335	0	0	0	0	0	0	0	0	0	0	0	0	0	0	0	0	0	0	0	0	0	0	0	0	0
BC-0306558337	0.000293655	0	0	0	0	0	0	0	0	0	0	0	0	0	0	0	0	0	0	0.594972	0	0	0	0	0
BC-0306558338	0	0	0	0	0	0	0	0	0	0	0	0	0	0	0	0	0	0	0	0	0	0	0	0	0
BC-0306558353	0.000272335	0	0	0	0	0	0	0	0	0	0	0	0	0	0	0	0	0	0	0.852386	0	0	0	0	1.52065e-05
BC-0306558357	0	0	0	0	0	0	0	0	0	0	0	0	0	0	0	0	0	0	0	0	0	0	0	0	0
BC-0306558358	0	0	0	0	0	0	0	0	0	0	0	0	0	0	0	0	0	0	0	0	0	0	0	0	0
BC-0306558360	0	0	0	0	0	0	0	0	0	0	0	0	0	0	0	0	0	0	0	0	0	0	0	0	0
BC-0306558364	0	0	0	0	0	0	0	0	0	0	0	0	0	0	0	0	0	0	0	0.0030998	0	0	0	0	0.00924995
BC-0306558397	0	0	0	0	0	0	0	0	0	0	0	0	0	0	0	0	0	0	0	0	0	0	0	0	0
BC-0306558400	0	0	0	0	0	0	0	0	0	0	0	0	0	0	0	0	0	0	0	0	0	0	0	0	0
BC-0306558516	0	0	0	0	0	0	0	0	0	0	0	0	0	0	0	0	0	0	0	0	0	0	0	0	0
BC-0306558525	0	0	0	0	0	0	0	0	0	0	0	0	0	0	0	0	0	0	0	0	0	0	0	0	0
BC-0306558535	0.000162547	0	0	0	0	0	0	0	0	0	0	0	0	0	0	0	0	0	0	0.325297	0	0	0	0	0
BC-0306558536	0	0	0	0	0	0	0	0	0	0	0	0	0	0	0	0	0	0	0	0	0	0	0	0	0
BC-0306558539	0	0	0	0	0	0	0	0	0	0	0	0	0	0	0	0	0	0	0	0	0	0	0	0	0
BC-0306558564	0.000118964	0	0	0	0	0	0	0	0	0	0	0	0	0	0	0	0	0	0	0	0	0	0	0	0
BC-0306558569	0	0	0	0	0	0	0	0	0	0	0	0	0	0	0	0	0	0	0	0	0	0	0	0	0
BC-0306558577	0	0	0	0	0	0	0	0	0	0	0	0	0	0	0	0	0	0	0	0	0	0	0	0	0
BC-0306558592	0	0	0	0	0	0	0	0	0	0	0	0	0	0	0	0	0	0	0	0	0	0	0	0	0
BC-0306558602	0	0	0	0	0	0	0	0	0	0	0	0	0	0	0	0	0	0	0	0	0	0	0	0	0
BC-0306559403	0	0	0	0	0	0	0	0	0	0	0	0	0	0	0	0	0	0	0	0	0	0	0	0	0
BC-0306559416	0	0	0	0	0	0	0	0	0	0	0	0	0	0	0	0	0	0	0	0	0	0	0	0	0
BC-0306559426	0	0	0	0	0	0	0	0	0	0	0	0	0	0	0	0	0	0	0	0	0	0	0	0	0
BC-0306559444	0	0	0	0	0	0	0	0	0	0	0	0	0	0	0	0	0	0	0	0	0	0	0	0	0
BC-0306559460	0	0	0	0	0	0	0	0	0	0	0	0	0	0	0	0	0	0	0	0	0	0	0	0	0
BC-0306559462	0.000333052	0	0	0	0	0	0	0	0	3.4424e-05	0	0	0	0	0	0	0	0	0	0.929357	0	0	0	0	0
BC-0306559466	0	0	0	0	0	0	0	0	0	0	0	0	0	0	0	0	0	0	0	0	0	0	0	0	0
BC-0306559503	0	0	0	0	0	0	0	0	0	0	0	0	0	0	0	0	0	0	0	0	0	0	0	0	0
BC-0332550682	0.000377105	0	0	0	0	0	0	0	0	3.2094e-05	0	0	0	0	0	0	0	0	0	0.842832	0	0	0	0	0
BC-0332552628	0.000326838	0	0	0	0	0	0	0	2.62425e-05	1.78926e-05	0	0	0	0	0	0	0	0	0	0.906382	0	0	0	0	0
BC-0332566842	0	0	0	0	0	0	0	0	0	0	0	0	0	0	0	0	0	0	0	0.997336	0	0	0	0	0
BC-0332566845	0	0	0	0	0	0	0	0	0	0	0	0	0	0	0	0	0	0	0	0.118707	0	0	0	0	0
BC-0332566860	6.60776e-05	0	0	0	0	0	0	0	0	0	0	0	0	0	0	0	0	0	0	0.0889464	0	0	0	0	0
BC-0332566863	7.14434e-05	0	0	0	0	0	0	0	0	0	0	0	0	0	0	0	0	0	0	0.133835	0	0	0	0	0
BC-0332566874	0	0	0	0	0	0	0	0	0	0	0	0	0	0	0	0	0	0	0	0.241933	0	0	0	0	0
BC-0332566887	0.00163885	0	0	0	0	0	0	0	0	0	0	0	0.000260247	0	0	0	0	0	0	0.746027	0	0	0	0	0
BC-0332566895	0.000328932	0	0	0	0	0	0	0	0	0	0	0	0	0	0	0	9.39805e-05	0	0	0.321061	0	0	0	0	0
BC-0332566901	0	0	0	0	0	0	0	0	0	0	0	0	0	0	0	0	0	0	0	0.110601	0	0	0	0	0
BC-0332566902	0	0	0	0	0	0	0	0	0	0	0	0	0	0	0	0	0	0	0	0.10691	0	0	0	0	0
BC-0332566904	0.000143006	0	0	0	0	0	0	0	0	0	0	0	6.06691e-05	0	0	0	0	0	0	0.137767	0	0	0	0	0
BC-0332567695	0	0	0	0	0	0	0	0	0	0.00027492	0	0	0	0	0	0	0	0	0	0.086167	0	0	0	0	0
BC-0332567697	0	0	0	0	0	0	0	0	0	0	0	0	0	0	0	0	0	0	0	0	0	0	0	0	0
BC-0332567698	0	0	0	0	0	0	0	0	0	0	0	0	0	0	0	0	0	0	0	0.171725	0	0	0	0	0
BC-0332567704	0	0	0	0	0	0	0	0	0	0	0	0	0	0	0	0	0	0	0	0	0	0	0	0	0
BC-0332567717	0	0	0	0	0	0	0	0	0	0	0	0	0	0	0	0	0	0	0	0.00154886	0	0	0	0	0.00514722
BC-0332567719	0	0	0	0	0	0	0	0	0	0	0	0	0	0	0	0	0	0	0	0.108861	0	0	0	0	0
BC-0332567727	0.000922318	0	0	0	0	0	0	0	0	0	0	0	0	0	0	0	0	0	0	0.849038	0	0	0	0	0
BC-0332567728	0	0	0	0	0	0	0	0	0	0	0	0	0	0	0	0	0	0	0	0.061884	0	0	0	0	0
BC-0332567730	0.00033293	0	0	0	0	0	0	0	0	0	0	0	0	0	0	0	0	0	0	0.2871	0	0	0	0	0
BC-0332567733	0	0	0	0	0	0	0	0	0	0	0	0	0	0	0	0	0	0	0	0	0	0	0	0	0
BC-0332567744	0.000434783	0	0	0	0	0	0	0	0	0	0	0	0	0	0	0	0	0	0	0.582761	0	0	0	0	0
BC-0332567746	0	0	0	0	0	0	0	0	0	0	0	0	0	0	0	0	0	0	0	0	0	0	0	0	0
BC-0332567749	0	0	0	0	0	0	0	0	0	0	0	0	8.35401e-05	0	0	0	0	0	0	0.0483363	0	0	0	0	0
BC-0332567755	0	0	0	0	0	0	0	0	0	0	0	0	0	0	0	0	0	0	0	0.319764	0	0	0	0	0
BC-0332567757	0	0	0	0	0	0	0	0	0	0	0	0	0	0	0	0	0	0	0	0.73139	0	0	0	0	0
BC-0332567759	0	0	0	0	0	0	0	0	0	5.79512e-05	0	0	0	0	0	0	0	0	0	0.000162263	0	0	0	0	0
BC-0332567776	0.000325316	0	0	0	0	0	0	0	0	0	0	0	0	0	0	0	0	0	0	0.292445	0	0	0	0	0
BC-0332567781	0.000568689	0	0	0	0	0	0	0	0	0	0	0	0	0	0	0	0	0	0	0.896634	0	0	0	0	0
BC-0332567785	0	0	0	0	0	0	0	0	0	0	0	0	0	0	0	0	0	0	0	0	0	0	0	0	0
BC-0332568281	0	0	0	0	0	0	0	0	0	0	0	0	0	0	0	0	0	0	0	0	0	0	0	0	0
BC-0332568293	0	0	0	0	0	0	0	0	0	0	0	0	0	0	0	0	0	0	0	0.000119329	0	0	0	0	0
BC-0332568303	0	0	0	0	0	0	0	0	0	0	0	0	0	0	0	0	0	0	0	0	0	0	0	0	0
BC-0332568310	0	0	0	0	0	0	0	0	0	0	0.000189837	0	0	0	0	0	0	0	0	0	0	0	0	0	0
BC-0332568311	0	0	0	0	0	0	0	0	0	0	0	0	0	0	0	0	0	0	0	0	0	0	0	0	0
BC-0332568325	0	0	0	0	0	0	0	0	0	0	0	0	0	0	0	0	0	0	0	0	0	0	0	0	0
BC-0332568330	0	0	0	0	0	0	0	0	0	0	0	0	0	0	0	0	0	0	0	0.00075829	0	0	0	0	0
BC-0332568357	0	0	0	0	0	0	0	0	0	0	0	0	0	0	0	0	0	0	0	0	0	0	0	0	0
BC-0332569424	0.000182141	0	0	0	0	0	0	0	0	0	0	0	0	0	0	0	0	0	0	0.171402	0	0	0	0	0
BC-0332569429	0.000162526	0	0	0	0	0	0	0	0	0	0	0	0	0	0	0	0	0	0	0.297567	0	0	0	0	0
BC-0332569430	0	0	0	0	0	0	0	0	0	0	0	0	0	0	0	0	0	0	0	0	0	0	0	0	0
BC-0332569431	0	0	0	0	0	0	0	0	0	0	0	0	0	0	0	0	0	0	0	0.853556	0	0	0	0	0
BC-0332569432	0	0	0	0	0	0	0	0	0	0	0	0	0	0	0	0	0	0	0	0	0	0	0	0	0.00052546
BC-0332569433	0	0	0	0	0	0	0	0	0	0	0	0	0	0	0	0	0	0	0	0.0424996	0	0	0	0	0
BC-0332569434	0	0	0	0	0	0	0	0	0	0	0	0	0	0	0	0	0	0	0	0.148614	0	0	0	0	0
BC-0332569435	0	0	0	0	0	0	0	0	0	0	0	0	0	0	0	0	0	0	0	0.000157102	0	0	0	0	0
BC-0332569442	0	0	0	0	0	0	0	0	0	0	0	0	0	0	0	0	0	0	0	0.0244712	0	0	0	0	0
BC-0332569443	0	0	0	0	0	0	0	0	0	0	0	0	0	0	0	0	0	0	0	0.170405	0	0	0	0	0.00012067
BC-0332569446	0	0	0	0	0	0	0	0	0	0	0	0	0	0	0	0	0	0	0	0.299332	0	0	0	0	0
BC-0332569454	0	0	0	0	0	0	0	0	0	0	0	0	0	0	0	0	0	0	0	0.0369423	0	0	0	0	0
BC-0332569460	0	0	0	0	0	0	0	0	0	0	0	0	0	0	0	0	0	0	0	0.114756	0	0	0	0	0
BC-0332569461	0.000117002	0	0	0	0	0	0	0	0	0	0	0	0	0	0	0	0	0	0	0.297615	0	0	0	0	0
BC-0332569464	0.000105164	0	0	0	0	0	0	0	0	0	0	0	0	0	0	0	0	0	0	0.282726	0	0	0	0	0
BC-0332569468	0	0	0	0	0	0	0	0	0	0	0	0	0	0	0	0	0	0	0	0	0	0	0	0	0
BC-0332569469	0	0	0	0	0	0	0	0	0	0	0	0	0	0	0	0	0	0	0	0	0	0	0	0	0
BC-0332569470	0	0	0	0	0	0	0	0	0	0	0	0	0	0	0	0	0	0	0	0.104037	0	0	0	0	0
BC-0332569471	0	0	0	0	0	0	0	0	0	0	0	0	0	0	0	0	0	0	0	0.000125437	0	0	0	0	0
BC-0332569475	0	0	0	0	0	0	0	0	0.000109414	0	0	0	0	0	0	0	0	0	0	0.0941734	0	0	0	0	0
BC-0332569477	0	0	0	0	0	0	0	0	0	0	0	0	0	0	0	0	0	0	0	0	0	0	0	0	0
BC-0332569479	0	0	0	0	0	0	0	0	0	0	0	0	0	0	0	0	0	0	0	0.00107619	0	0	0	0	0
BC-0332569485	0	0	0	0	0	0	0	0	0	0	0	0	0	0	0	0	0	0	0	0.0401805	0	0	0	0	0
BC-0332569491	0	0	0	0	0	0	0	0	0	0	0	0	0	0	0	0	0	0	0	0.00062567	0	0	0	0	0
BC-0332569492	0	0	0	0	0	0	0	0	0	0	0	0	7.63557e-05	0	0	0	0	0	0	0.300719	0	0	0	0	0
BC-0332569494	0	0	0	0	0	0	0	0	0	0	0	0	0	0	0	0	0	0	0	0	0	0	0	0	0
BC-0332569497	0	0	0	0	0	0	0	0	0	0.000103353	0	0	0	0	0	0	0	0	0	0	0	0	0	0	0
BC-0332569499	0	0	0	0	0	0	0	0	0	0	0	0	0	0	0	0	0	0	0	0.216496	0	0	0	0	0.000107138
BC-0332569501	0.000103884	0	0	0	0	0	0	0	0.000111876	0	0	0	0	0	0	0	0	0	0	0.258672	0	0	0	0	0
BC-0332569503	0	0	0	0	0	0	0	0	0	8.08077e-05	0	0	0	0	0	0	0	0	0	0	0	0	0	0	0
BC-0332569510	0	0	0	0	0	0	0	0	0	0	0	0	0	0	0	0	0	0	0	0.0732883	0	0	0	0	0
BC-0332569887	0.000237164	0	0	0	0	0	0	0	0	0	0	0	0	0	0	0	0	0	0	0.516812	0	0	0	0	0
BC-0332569986	0	0	0	0	0	0	0	0	0	5.793e-05	0	0	0	0	0	0	0	0	0	0	0	0	0	0	0
BC-0332569991	0.000347805	0	0	0	0	0	0	0	0	0	0	0	0	0	0	0	0	0	0	0.714582	0	0	0	0	0
BC-0332569995	0	0	0	0	0	0	0	0	0	0	0	0	0	0	0	0	0	0	0	0	0	0	0	0	0
BC-0332570011	0	0	0	0	0	0	0	0	0	0	0	0	0	0	0	0	0	0	0	0	0	0	0	0	0
BC-0332570020	0.000253801	0	0	0	0	0	0	0	1.29679e-05	0	0	0	0	0	0	0	0	0	4.07563e-05	0.897787	0	0	0	0	0
BC-0332570037	0.000411064	0	0	0	0	0	0	0	5.53e-05	0	0	0	0	0	0	0	0	0	0	0.77979	0	0	0	0	0
BC-0332570045	0.00034881	0	0	0	0	0	0	0	7.44412e-05	0	0	0	0	0	0	0	0	0	0	0.768428	0	0	0	0	0
BC-0332570054	0	0	0	0	0	0	0	0	0	0	0	0	0	0	0	0	0	0	0	0	0	0	0	0	0
BC-0332570062	0	0	0	0	0	0	0	0	0	0	0	0	0	0	0	0	0	0	0	0	0	0	0	0	0
BC-0332570064	0	0	0	0	0	0	0	0	0	0	0	0	0	0	0	0	0	0	0	0	0	0	0	0	0
BC-0332570133	0	0	0	0	0	0	0	0.000157828	0	0	0	0	0	0	0	0	0	0	0	0	0	0	0	0	0
BC-0332570156	0.000348229	0	0	0	0	0	0	0	6.20236e-05	0	2.09236e-05	0	0	0	0	0	0	0	0	0.925105	0	0	0	0	0
BC-0332570158	0	0	0	0	0	0	0	0	0	0	0	0	0	0	0	0	0	0	0	0	0	0	0	0	0
BC-0332570176	0	0	0	0	0	0	0	0	0	0	0	0	0	0	0	0	0	0	0	0.000799877	0	0	0	0	0
BC-0332570379	0	0	0	0	0	0	0	0	0	0	0	0	0	0	0	0	0	0	0	0	0	0	0	0	0
BC-0332570383	0	0	0	0	0	0	0	0	0	0	0	0	0	0	0	0	0	0	0	0	0	0	0	0	0
BC-0332570389	0	0	0	0	0	0	0	0	0	0	0	0	0	0	0	0	0	0	0	0	0	0	0	0	0
BC-0332570393	0	0	0	0	0	0	0	0	0	0	0	0	0	0	0	0	0	0	0	0	0	0	0	0	0
BC-0332570398	0	0	0	0	0	0	0	0	0	0	0	0	0	0	0	0	0	0	0	0	0	0	0	0	0
BC-0332570415	0	0	0	0	0	0	0	0	0	0	0	0	0	0	0	0	0	0	0	0	0	0	0	0	0
BC-0332570440	0	0	0	0	0	0	0	0	0	0	0	0	0	0	0	0	0	0	0	0.000101297	0	0	0	0	0
BC-0332570441	0	0	0	0	0	0	0	0	0	0	0	0	0.000115804	0	0	0	0	0	0	0	0	0	0	0	0
BC-0332570454	0	0	0	0	0	0	0	0	0	0	0	0	0	0	0	0	0	0	0	0	0	0	0	0	0
BC-0332570465	0.000368983	0	0	0	0	0	0	0	6.96681e-05	0	2.5803e-05	0	0	0	0	0	0	0	0	0.803895	0	0	0	0	0
BC-0332570922	0.000228403	0	0	0	0	0	0	0	4.27042e-05	0	0	0	0	0	0	0	0	0	0	0.947115	0	0	0	0	0
BC-0332570959	0	0	0	0	0	0	0	0	0	0	0	0	0	0	0	0	0	0	0	0.00109998	0	0	0	0	0
BC-0332570979	0	0	0	0	0	0	0	0	0	0	0	0	0	0	0	0	0	0	0	0	0	0	0	0	0
BC-0332570987	0.000238279	0	0	0	0	0	0	0	3.11319e-05	0	0	0	0	0	0	0	0	0	0	0.86338	0	0	0	0	0
BC-0332570988	0.000362236	0	0	0	0	0	0	0	0	0	0	0	0	0	0	0	0	0	0	0.82355	0	0	0	0	0
BC-0332571009	0	0	0	0	0	0	0	0	0	0	0	0	0	0	0	0	0	0	0	0	0	0	0	0	0
BC-0332571010	0	0	0	5.05709e-05	0	0	0	0	0	0	0	0	0	0	0	0	0	0	0	5.5628e-05	0	0	0	0	0
BC-0332571038	0.000358049	0	0	0	0	0	0	0	2.15424e-05	0	0	0	0	0	0	0	0	0	2.82279e-05	0.928366	0	0	0	1.18854e-05	0
BC-0332571073	0.000337074	0	0	0	0	0	0	0	1.21066e-05	0	0	0	0	0	0	0	0	0	2.23017e-05	0.945384	0	0	0	0	0
BC-0332571347	0.000297501	0	0	0	0	0	0	0	0	0	0	0	0	0	0	0	0	0	0	0.934265	0	0	0	0	0
BC-0332571351	0.000184018	0	0	0	0	0	0	0	0	0	0	0	0	0	0	0	0	0	0	0.557216	0	0	0	0	0
BC-0332571358	0	0	0	0	0	0	0	0	0	0	0	0	0	0	0	0	0	0	0	0	0	0	0	0	0
BC-0332571403	0.000231982	0	0	0	0	0	0	0	0	0	0	0	0	0	0	0	0	0	0	0.523264	0	0	0	0	0
BC-0332571423	0.000601958	0	0	0	0	0	0	0	0	0	0	0	0	0	0	0	0	0	0	0.838313	0	0	0	0	0
BC-0332571621	0	0	0	0	0	0	0	0	0	0	0	0	0	0	0	0	0	0	0	0.000190036	0	0	0	0	0
BC-0332571626	0.000338067	0	0	0	0	0	0	0	5.31248e-05	0	0	0	0	0	0	0	0	0	0	0.863002	0	0	0	0	0
BC-0332571639	0.000364158	0	0	0	0	0	0	0	0	0	0	0	0	0	0	0	0	0	2.31737e-05	0.881226	0	0	0	0	0
BC-0332571644	0	0	0	0	0	0	0	0	0	0	0	0	0	0	0	0	0	0	0	0	0	0	0	0	0
BC-0332571647	0.000113662	0	0	0	0	0	0	0	0	0	0	0	0	0	0	0	0	0	0	0.530213	0	0	0	0	0
BC-0332571672	0	0	0	0	0	0	0	0	0	0	0	0	0	0	0	0	0	0	0	8.46054e-05	0	0	0	0	0
BC-0332571674	0	0	0	0	0	0	0	0	0	0	0	0	0	0	0	0	0	0	0	0	0	0	0	0	0
BC-0332571691	0.000556587	0	0	0	0	0	0	0	0	0	0	0	0	0	0	0	0	0	0	0.91814	0	0	0	0	0
BC-0332571693	0.000343912	0	0	0	0	0	0	0	3.70683e-05	0	0	0	0	0	0	0	0	0	0	0.668327	0	0	0	0	0
BC-0332571701	0.000405288	0	0	0	0	0	0	0	1.09084e-05	0	0	0	0	0	0	0	0	0	0	0.955567	0	0	0	0	0
BC-0332571705	0	0	0	0	0	0	0	0	0	0	0	0	0	0	0	0	0	0	0	0	0	0	0	0	0
BC-0332571710	0	0	0	0	0	0	0	0	0	0	0	0	0	0	0	0	0	0	0	0	0	0	0	0	0
BC-0332571810	0.000546998	0	0	0	0	0	2.5898e-05	0	3.76699e-05	0	0	0	0	0	0	0	0	0	0	0.911247	0	0	0	0	0
BC-0332572207	0	0	0	0	0	0	0	0	0	0	0	0	0	0	0	0	0	0	0	0	0	0	0	0	0
BC-0332572280	0	0	0	0	0	0	0	0	0	0	0	0	0	0	0	0	0	0	0	0	0	0	0	0	0
BC-0332572325	0	0	0	0	0	0	0	0	0	0	0	0	0	0	0	0	0	0	0	0	0	0	0	0	0
BC-0332572340	0.000446812	0	0	0	0	0	0	0	0.000100773	0	0	0	0	0	0	0	0	0	2.45267e-05	0.95849	0	0	0	0	0
BC-0332572503	0.000475178	0	0	0	0	0	0	0	2.29925e-05	0	0	0	0	0	0	0	0	0	0	0.862441	0	0	0	0	0
BC-0332572519	0	0	0	0	0	0	0	0	0	0.000471	0	0	0	0	0	0	0	0	0	0	0	0	0	0	0
BC-0332572535	0	0	0	0	0	0	0	0	0	0.000459721	0	0	0	0	0	0	0	0	0	0	0	0	0	0	0
BC-0332572536	0.000395265	0	0	2.26675e-05	0	0	0	0	0	0	0	0	0	0	0	0	0	0	0	0.788923	0	0	0	0	0
BC-0332572537	0.000222279	0	0	0	0	0	0	0	0	0	0	0	0	0	0	0	0	0	0	0.41719	0	0	0	0	0
BC-0332572541	0	0	0	0	0	0	0	0	0	0	0	0	0	0	0	0	0	0	0	0	0	0	0	0	0
BC-0332572565	0	0	0	0	0	0	0	0	0	0	0	0	0	0	0	0	0	0	0	0	0	0	0	0	0
BC-0332572605	0.00028325	0	0	0	0	0	0	0	8.19317e-05	0	2.80909e-05	0	0	0	0	0	0	0	0	0.893074	0	0	0	0	0
BC-0332572628	0.000185152	0	0	0	0	0	0	0	0	0	0	0	0	0	0	0	0	0	0	0.660617	0	0	0	0	0
BC-0332572632	0.000276188	0	0	0	0	0	0	0	4.24904e-05	0	0	0	0	0	0	0	0	0	0	0.936763	0	0	0	0	0
BC-0332572666	0.000520528	0	0	0	0	0	0	0	0	0	0	0	0	0	0	0	0	0	0	0.87428	0	0	0	0	0
BC-0332572828	0	0	0	0	0	0	0	0	0	0	0	0	0	0	0	0	0	0	0	0.10755	0	0	0	0	0
BC-0332572836	0	0	0	0	0	0	0	0	0	0	0	0	0	0	0	0	0	0	0	0	0	0	0	0	0
BC-0332572866	0	0	0	0	0	0	0	0	0	0.000224169	0	0	0	0	0	0	0	0	0	0	0	0	0	0	0
BC-0332572883	0	0	0	0	0	0	0	0	0	0.000465381	0	0	0	0	0	0	0	0	0	0	0	0	0	0	0
BC-0332572891	0	0	0	0	0	0	0	0	0	0.000374657	0	0	0	0	0	0	0	0	0	0	0	0	0	0	0
BC-0332572924	0	0	0	0	0	0	0	0	0	0	0	0	0	0	0	0	0	0	0	0	0	0	0	0	0
BC-0332572950	0	0	0	0	0	0	0	0	0	0	0	0	0	0	0	0	0	0	0	0	0	0	0	0	0
BC-0332573415	0	0	0	0	0	0	0	0	0	2.91301e-05	0	0	0	0	0	0	0	0	0	0.00631395	0	0	0	0	0
BC-0332573440	0.00059936	0	0	0	0	0	0	0	2.44637e-05	0	0	0	0	0	0	0	0	0	0	0.840761	0	0	0	0	0
BC-0332573446	0	0	0	0	0	0	0	0	0	0	0	0	0	0	0	0	0	0	0	0	0	0	0	0	0
BC-0332573472	0.000297184	0	0	0	0	0	0	0	4.30701e-05	0	0	0	0	0	0	0	0	0	3.15848e-05	0.933297	0	0	0	0	0
BC-0332573488	0.000267195	0	0	0	0	0	0	0	0.000118862	0	0	0	0	0	0	0	0	0	0	0.889391	0	0	0	0	0
BC-0332573521	0.000370251	0	0	0	0	0	0	0	0	0	0	0	0	0	0	0	1.12507e-05	0	0	0.912914	0	0	0	0	0
BC-0332573540	0.000453661	0	0	0	0	0	0	0	0	0	2.20224e-05	0	0	0	0	0	0	0	0	0.954948	0	0	0	0	0
BC-0332573566	0	0	0	0	0	0	0	0	0	0	0	0	0	0	0	0	0	0	0	0	0	0	0	0	0
BC-0332573585	0	0	0	0	0	0	0	0	0	0	0	0	0	0	0	0	0	0	0	0.000813988	0	0	0	0	0
BC-0332573586	0.000627832	0	0	0	0	0	0	0	2.08286e-05	1.56214e-05	0	0	0	0	0	0	0	0	0	0.94934	0	0	0	0	0
BC-0332573607	5.64254e-05	0	0	0	0	0	0	0.000818169	0	0	0	0	0	0	0	0	0	0	0	0.142083	0	0	0	0	0
BC-0332573613	0	0	0	0	0	0	0	0	0	0	0	0	0	0	0	0	0	0	0	0	0	0	0	0	0
BC-0332573619	0.000290953	0	0	0	0	0	2.91601e-05	0	8.16484e-05	0	0	0	0	0	0	0	0	0	0	0.959793	0	0	0	0	2.65681e-05
BC-0332573829	0	0	0	0	0	0	0	0	0	0	0	0	0	0	0	0	0	0	0	0.0106059	0	0	0	0	0
BC-0332573832	0	0	0	0	0	0	0	0	0	0.000332319	0	0	0	0	0	0	0	0	0	0	0	0	0	0	0
BC-0332573839	0	0	0	0	0	0	0	0	0	0	0	0	0	0	0	0	0	0	0	0	0	0	0	0	0
BC-0332573844	0	0	0	0	0	0	0	0	0	0	0	0	0	0	0	0	0	0	0	0	0	0	0	0	0
BC-0332573845	0	0	0	0	0	0	0	0	0	0	0	0	0	0	0	0	0	0	0	0	0	0	0	0	0
BC-0332573847	0	0	0	0	0	0	0	0	0	0	0	0	0	0	0	0	0	0	0	0	0	0	0	0	0
BC-0332573854	0	0	0	0	0	0	0	0	0	0	0	0	0	0	0	0	0	0	0	0.000211842	0	0	0	0	0
BC-0332573856	0	0	0	0	0	0	0	0	0	0	0	0	0	0	0	0	0	0	0	0	0	0	0	0	5.41546e-05
BC-0332573857	0	0	0	0	0	0	0	0	0	0.000911609	0	0	0	0	0	0	0	0	0	0.000313148	0	0	0	0	0
BC-0332573862	0	0	0	0	0	0	0	0	0	0	0	0	0	0	0	0	0	0	0	0.00388394	0	0	0	0	0
BC-0332573865	0	0	0	0	0	0	0	0	0	0	0	0	0	0	0	0	0	0	0	0	0	0	0	0	0
BC-0332573894	0	0	0	0	0	0	0	0	0	0	0	0	0	0	0	0	0	0	0	0	0	0	0	0	0
BC-0332574692	0.000437341	0	0	0	0	0	0	0	4.46044e-05	0	0	0	0	0	0	0	0	0	0	0.943654	0	0	0	0	0
BC-0332574694	0	0	0	0	0	0	0	0	0	0	0	0	0	0	0	0	0	0	0	0	0	0	0	0	0
BC-0332574707	0	0	0	0	0	0	0	0	0	0	0	0	0	0	0	0	0	0	0	0	0	0	0	0	0
BC-0332574715	0	0	0	0	0	0	0	0	0	0.000238514	0	0	0	0	0	0	0	0	0	0	0	0	0	0	0
BC-0332574716	0	0	0	0	0	0	0	0	0	9.25462e-05	0	0	0	0	0	0	0	0	0	0	0	0	0	0	0
BC-0332574726	0	0	0	0	0	0	0	0	0	0	0	0	0	0	0	0	0	0	0	0	0	0	0	0	0
BC-0332574727	0	0	0	0	0	0	0	0	0	0.00152204	0	0	0	0	0	0	0	0	0	0	0	0	0	0	0
BC-0332574731	0	0	0	0	0	0	0	0	0	0.000533691	0	0	0	0	0	0	0	0	0	0	0	0	0	0	0
BC-0332574742	0	0	0	0	0	0	0	0	0	5.55364e-05	0	0	0	0	0	0	0	0	0	0	0	0	0	0	0
BC-0332574748	0	0	0	0	0	0	0	0	0	7.13453e-05	0	0	0	0	0	0	0	0	0	0	0	0	0	0	0
BC-0332574750	0	0	0	0	0	0	0	0	0	0	0	0	0	0	0	0	0	0	0	0	0	0	0	0	0
BC-0332574754	0	0	0	0	0	0	0	0	0	0.000143526	0	0	0	0	0	0	0	0	0	0	0	0	0	0	0
BC-0332574759	0	0	0	0	0	0	0	0	0	0.00149289	0	0	0	0	0	0	0	0	0	0	0	0	0	0	0
BC-0332574763	0	0	0	0	0	0	0	0	0	0.000427696	0	0	0	0	0	0	0	0	0	0	0	0	0	0	0
BC-0332574765	0	0	0	0	0	0	0	0	0	0	0	0	0	0	0	0	0	0	0	0	0	0	0	0	0
BC-0332574768	0	0	0	0	0	0	0	0	0	0.00073812	0	0	0	0	0	0	0	0	0	0	0	0	0	0	0
BC-0332574771	0	0	0	0	0	0	0	0	0	0	0	0	0	0	0	0	0	0	0	0	0	0	0	0	0
BC-0332574907	0	0	0	0	0	0	0	0	0	0	0	0	0	0	0	0	0	0	0	0	0	0	0	0	0
BC-0332574925	0	0	0	0	0	0	0	0	0	0.000138599	0	0	0	0	0	0	0	0	0	0	0	0	0	0	0
BC-0332574938	0	0	0	0	0	0	0	0	0	0.000323423	0	0	0	0	0	0	0	0	0	0	0	0	0	0	0
BC-0332574962	0	0	0	0	0	0	0	0	0	0.000333475	0	0	0	0	0	0	0	0	0	0	0	0	0	0	0
BC-0332574978	0	0	0	0	0	0	0	0	0	0	0	0	0	0	0	0	0.000319675	0	0	0	0	0	0	0	0
BC-0332575167	0	0	0	0	0	0	0	0	0	0	0	0	0	0	0	0	0	0	0	0	0	0	0	0	0
BC-0332575171	0	0	0	0	0	0	0	0	0	0	0	0	0	0	0	0	0	0	0	0	0	0	0	0	0
BC-0332575173	0	0	0	0	0	0	0	0	0	0	0	0	0	0	0	0	0	0	0	0	0	0	0	0	0
BC-0332575189	0	0	0	0	0	0	0	0	0	0	0	0	0	0	0	0	0	0	0	0	0	0	0	0	0
BC-0332575196	0	0	0	0	0	0	0	0	0	8.05283e-05	0	0	0	0	0	0	0	0	0	0	0	0	0	0	0
BC-0332575197	0	0	0	0	0	0	0	0	0	0	0	0	0	0	0	0	0	0	0	0	0	0	0	0	0
BC-0332575203	0	0	0	0	0	0	0	0	0	0	0	0	0	0	0	0	0	0	0	0	0	0	0	0	0
BC-0332575206	0	0	0	0	0	0	0	0	0	0	0	0	0	0	0	0	0	0	0	0	0	0	0	0	0
BC-0332575209	0	0	0	0	0	0	0	0	0	0	0	0	0	0	0	0	0	0	0	0	0	0	0	0	0
BC-0332575212	0	0	0	0	0	0	0	0	0	0	0	0	0	0	0	0	0	0	0	0	0	0	0	0	0
BC-0332575216	0	0	0	0	0	0	0	0	0	0	0	0	0	0	0	0	0	0	0	0	0	0	0	0	0
BC-0332575220	0.00041581	0	0	0	0	0	0	0	6.06653e-05	0	0	0	0	0	0	0	0	0	0	0.827688	0	0	0	0	0
BC-0332575222	0	0	0	0	0	0	0	0	0	3.64706e-05	0	0	0	0	0	0	0	0	3.64706e-05	3.64706e-05	0	0	0	0	0
BC-0332575225	0.00033425	0	0	0	0	0	0	0	0	0	3.27696e-05	0	0	0	0	0	0	0	0	0.768968	0	0	0	0	0
BC-0332575231	0	0	0	0	0	0	0	0	0	0.000218681	0	0	0	0	0	0	0	0	0	0	0	0	0	0	0
BC-0332575232	0	0	0	0	0	0	0	0	0	0.000842802	0	0	0	0	0	0	0	0	0	0	0	0	0	0	0
BC-0332575236	0	0	0	0	0	0	0	0	0	0	0	0	0	0	0	0	0	0	0	0	0	0	0	0	0
BC-0332575243	0	0	0	0	0	0	0	0	0	0	0	0	0	0	0	0	0	0	0	0	0	0	0	0	0
BC-0332575258	0.000323521	0	0	0	0	0	0	0	0	0	2.80105e-05	0	0	0	0	0	0	0	0	0.761227	0	0	0	0	0
BC-0332575299	0.000653852	0	0	0	0	0	3.20067e-05	0	1.42887e-05	0	0	0	0	0	0	0	0	0	0	0.936149	0	0	0	0	0
BC-0332575393	0.000386438	0	0	0	0	0	0	0	4.5591e-05	0	0	0	0	0	0	0	0	0	0	0.929669	0	0	0	0	0
BC-0332575395	0.000503473	0	0	0	0	0	0	0	0	3.32719e-05	2.63664e-05	0	0	0	0	0	0	0	0	0.944355	0	0	0	0	0
BC-0332575612	0.000678054	0	0	0	0	0	1.2338e-05	0	2.9504e-05	0	0	0	0	0	0	0	0	0	3.54047e-05	0.946622	0	0	0	0	0
BC-0332605259	0.000467282	0	0	0	2.29647e-05	0	0	0	7.38864e-05	0	0	0	0	0	0	0	0	0	0	0.927008	0	0	0	0	0
BC-0332607079	0	0	0	0	0	0	0	0	0	0	0	0	0	0	0	0	0	0	0	0	0	0	0	0	0
BC-0332607088	0	0	0	0	0	0	0	0	0	0	0	0	0	0	0	0	0	0	0	0	0	0	0	0	0
BC-0332607140	0.000325866	0	0	0	0	0	0	0	0	0	0	0	0	0	0	0	0	0	0	0.952774	0	0	0	1.79319e-05	0
BC-0332607151	0	0	0	0	0	0	0	0	0	0	0	0	0	0	0	0	0	0	0	0	0	0	0	0	0
BC-0332607153	0	0	0	0	0	0	0	0	0	0	0	0	0	0	0	0	0	0	0	0.00195632	0	0	0	0	0
BC-0332608790	0	0	0	0	0	0	0	0	0	0	0	0	0	0	0	0	0	0	0	0	0	0	0	0	0
BC-0332609036	0.000380563	0	0	0	0	0	0	0	3.24561e-05	0	0	0	0	0	0	0	0	0	0	0.890972	0	0	0	0	0
BC-0332609380	0.000533679	0	0	0	0	0	0	0	3.92989e-05	0	9.43174e-06	0	0	0	0	0	0	0	0	0.952508	0	0	0	0	0
BC-0332613589	0	0	0	0	0	0	0	0	0	0	0	0	0	0	0	0	0	0	0	0	0	0	0	0	0
BC-0332613618	0	0	0	0	0	0	0	0	0	0	0	0	0	0	0	0	0	0	0	0	0	0	0	0	0
BC-0332613654	0	0	0	0	0	0	0	0	0	0	0	0	0	0	0	0	0	0	0	0	0	0	0	0	0
BC-0332613779	0	0	0	0	0	0	0	0	0	0	0	0	0	0	0	0	0	0	0	0	0	0	0	0	0
BC-0332613790	0	0	0	0	0	0	0	0	0	0	0	0	0	0	0	0	0	0	0	0	0	0	0	0	0
BC-0332613802	0	0	0	0	0	0	0	0	0	0	0	0	0	0	0	0	0	0	0	0	0	0	0	0	0
BC-0332613810	0	0	0	0	0	0	0	0	0	0	0	0	0	0	0	0	0	0	0	0	0	0	0	0	0
BC-0332613811	0	0	0	0	0	0	0	0	0	0	0	0	0	0	0	0	0	0	0	0.000160331	0	0	0	0	0
BC-0332613813	0	0	0	0	0	0	0	0	0	0	0	0	0	0	0	0	0	0	0	0	0	0	0	0	0
BC-0332613821	0	0	0	0	0	0	0	0	0	0	0	0	0	0	0	0	0	0	0	0	0	0	0	0	0
BC-0332613830	0	0	0	0	0	0	0	0	0	0	0	0	0	0	0	0	0	0	0	0	0	0	0	0	0
BC-0332613845	0	0	0	0	0	0	0	0	0	0	0	0	0	0	0	0	0	0	0	0	0	0	0	0	0
BC-0332613853	0	0	0	0	0	0	0	0	0	0	0	0	0	0	0	0	0	0	0	0.000169812	0	0	0	0	0
BC-0332613860	0	0	0	0	0	0	0	0	0	0	0	0	0	0	0	0	0	0	0	0.0002592	0	0	0	0	0
BC-0332613947	0.000450578	0	0	0	0	0	0	0	0	0	0	0	0	0	0	0	0	0	0	0.93502	0	0	0	0	0
BC-0332614728	0	0	0	0	0	0	0	0	0	0	0	0	0	0	0	0	0	0	0	0.992584	0	0	0	0	0
BC-0332614764	0	0	0	0	0	0	0	0	0	0	0	0	0	0	0	0	0	0	0	0	0	0	0	0	0
BC-0332614780	0	0	0	0	0	0	0	0	0	0	0	0	0	0	0	0	0	0	0	0	0	0	0	0	0
BC-0332614786	0	0	0	0	0	0	0	0	0	0	0	0	0	0	0	0	0	0	0	2.70636e-05	0	0	0	0	0
BC-0332614796	0	0	0	0	0	0	0	0	0	0	0	0	0	0	0	0	0	0	0	0	0	0	0	0	0
BC-0332614800	0	0	0	0	0	0	0	0	0	0	0	0	0	0	0	0	0	0	0	0	0	0	0	0	0
BC-0332614805	0	0	0	0	0	0	0	0	0	0	0	0	0	0	0	0	0	0	0	0	0	0	0	0	0
BC-0332615144	0	0	0	0	0	0	0	0	0	0	0	0	0	0	0	0	0	0	0	0.0051161	0	0	0	0	0.015978
BC-0332615161	0.000730473	0	0	0	0	0	0	0	1.98858e-05	0	1.4583e-05	0	0	0	0	0	0	0	1.32572e-05	0.944464	0	0	0	0	0
BC-0332615189	0.00032195	0	0	0	0	0	9.61043e-06	0	0	0	8.23752e-06	0	0	0	0	0	0	0	0	0.928162	0	0	0	0	0
BC-0332634806	0	0	0	0	0	0	0	0	0	0	0	0	0	0	0	0	0	0	0	0	0	0	0	0	0
BC-0332635871	0	0	0	0	0	0	0	0	0	0	0	0	0	0	0	0	0	0	0	0	0	0	0	0	0
BC-0332755255	0	0	0	0	0	0	0	0	0	0	0	0	0	0	0.000102314	0	0	0	0	0	0	0	0	0	0
BC-0332756636	0	0	0	0	0	0	0	0	0	0	0	0	0	0	0	0	0	0	0	0	0	0	0	0	0
BC-0332758498	0	0	0	0	0	0	0	0	0	0	0	0	0	0	0	0	0	0	0	0	0	0	0	0	0
BC-0332758516	0	0	0	0	0	0	0	0	0	0	0	0	0	0	0	0	0	0	0	0	0	0	0	0	0
BC-0332758524	0	0	0	0	0	0	0	0	0	0	0	0	0	0	0	0	0	0	0	0	0	0	0	0	0
BC-0332758526	0.000134362	0	0	0	0	0	0	0	0	0	0	0	0	0	0	0	0	0	0	0	0	0	0	0	0
BC-0332760505	0	0	0	0	0	0	0	0	2.92649e-05	2.43874e-05	0	0	0	0	0	0	0	0	0	0.00454906	0	0	0	0	0
BC-0332761757	0.000280146	0	0	0	0	0	0	0	2.72709e-05	0	0	0	0	0	0	0	0	0	0	0.948477	0	0	0	0	0
BC-0332761794	0.000373153	0	0	0	0	0	0	0	5.66455e-05	2.69066e-05	0	0	0	0	0	0	0	0	0	0.944375	0	0	0	0	0
BC-0332763054	0	0	0	0	0	0	0	0	0	0	0	0	0	0	0	0	0	0	0	0	0	0	0	0	0
BC-0332766376	0.000649383	0	0	0	0	0	0	0	2.32495e-05	0	0	0	0	0	0	0	0	0	4.89041e-05	0.942829	0	0	0	0	0
BC-0332766553	0	0	0	0	0	0	0	0	9.46668e-05	0	0	0	0	0	0	0	0	0	0	0.0107404	0	0	0	0	0
BC-0332766577	0	0	0	0	0	0	0	0	8.44871e-05	0	0	0	0	7.92067e-05	0	0	0	0	0	0.0142202	0	0	0	0	0
BC-0332767065	0.00012845	0	0	0	0	0	0	0	0	0	0	0	0	0	0	0	0.000197615	0	0	0.00109676	0	0	0	0	0
BC-0332767076	0	0	0	0	0	0	0	0	0	0	0	0	0	0	0	0	0	0	0	9.6752e-05	0	0	0	0	0
BC-0332767104	0	0	0	0	0	0	0	0	0	0	0	0	0	0	0	0	0	0	0	0	0	0	0	0	0
BC-0332767131	0	0	0	0	0	0	0	0	0.00010124	0	0	0	0	0	0	0	0	0	0	0.0196221	0	0	0	0	0
BC-0332767142	0	0	0	0	0	0	0	0	8.68938e-05	0	0	0	0	0	0	0	0	0	0	0.0129037	0	0	0	0	0
BC-0332767281	0	0	0	0	0	0	0	0	0	0	0	0	0	0	0	0	0	0	0	0.0143693	0	0	0	0	0
BC-0332767787	0.000412678	0	0	0	0	0	0	0	5.42997e-05	0	0	0	0	0	0	0	0	0	0	0.901924	0	0	0	0	0
BC-0332767798	0	0	0	0	0	0	0	0	6.18232e-05	0	0	0	8.65525e-05	0	0	0	0	0	0	0.00988244	0	0	0	0	0
BC-0332767854	0	0	0	0	0	0	0	0	1.68072e-05	0	0	0	0	0	0	0	0	0	0	0.00392087	0	0	0	0	0
BC-0332767877	0	0	0	0	0	0	0	0	0	0	0	0	0	0	0	0	0	0	0	0.000469582	0	0	0	0	0
BC-0332769064	0	0	0	0	0	0	0	0	0	0	0	0	0	0	0	0	0	0	0	0	0	0	0	0	0
BC-0332769390	0.000136356	0	0	0	0	0	0	0	1.6528e-05	0	0	0	0	0	0	0	0	0	0	0.947638	0	0	0	0	0
BC-0332769475	0	0	0	0	0	0	0	0	0	0	0	0	0	0	0	0	0	0	0	0.0122545	0	0	0	0	0
BC-0332771096	0.000328986	0	0	0	0	0	0	0	3.67395e-05	0	0	0	0	0	0	0	0	0	0	0.905965	0	0	0	0	0
BC-0332771732	0.000352552	0	0	0	0	0	0	0	8.36411e-05	0	0	0	0	0	0	0	0	0	2.51823e-05	0.939205	0	0	0	0	0
BC-0332771833	0.000418515	0	0	0	0	0	0	0	3.63926e-05	0	5.38307e-05	0	0	0	0	0	0	0	0	0.924399	0	0	0	3.03272e-05	0
BC-0332772768	0.000415209	0	0	0	0	0	0	0	0	0	0	0	0	0	0	0	0	0	3.28786e-05	0.915059	0	0	0	0	0
BC-0332772981	0	0	0	0	0	0	0	0	0	0	0	0	0	0	0	0	0	0	0	0.00024515	0	0	0	0	0
BC-0332772990	0	0	0	0	0	0	0	0	0	0	0	0	0	0	0	0	0	0	0	0	0	0	0	0	0
BC-0332772991	0	0	0	0	0	0	0	0	0	0	0	0	0	0	0	0	0	0	0	0	0	0	0	0	0
BC-0332772999	0	0	0	0	5.04728e-05	0	0	0	0	0	0	0	0	0	0	0	0	0	0	0	0	0	0	0	0
BC-0332773005	0	0	0	0	0	0	0	0	0	0	0	0	0	0	0	0	0	0	0	0	0	0	0	0	0
BC-0332773006	0	0	0	0	0	0	0	0	0	0	0	0	0	0	0	0	0	0	0	0	0	0	0	0	0
BC-0332773007	0	0	0	0	0	0	0	0	0	0	0	0	0	0	0	0	0	0	0	0	0	0	0	0	0
BC-0332773014	0	0	0	0	0	0	0	0	0	0	0	0.000658428	0	0	0	0	0	0	0	0	0	0	0	0	0
BC-0332773015	0	0	0	0	0	0	0	0	0	0	0	0	0	0	0	0.000128898	0	0	0	0	0	0	0	0	0
BC-0332773019	0	0	0	0	0	0	0	0	0	0	0	0	0	0	0	0	0	0	0	0	0	0	0	0	0
BC-0332773031	0	0	0	0	0	0	0	0	0	0	0	0	0	0	0	0	0	0	0	0	0	0	0	0	0
BC-0332773045	0	0	0	0	0	0	0	0	0	0	0	0	0	0	0	0	0	0	0	0.000266278	0	0	0	0	0
BC-0332773055	0	0	0	0	0	0	0	0	0	0	0	0	0	0	0	0	0	0	0	0	0	0	0	0	0
BC-0332773183	0.000280329	0	0	0	0	0	0	0	2.84117e-05	0	0	0	0	0	0	0	0	0	0	0.952486	0	0	0	0	0
BC-0332773196	0	0	0	0	0	0	0	0	0	0	0	0	0	0	0	0	0	0	0	0	0	0	0	0	0
BC-0332773198	0	0	0	0	0	0	0	0	0	0	0	0	0	0	0	0	0	0	0	0	0	0	0	0	0
BC-0332773205	0	0	0	0	0	0	0	0	0	0	0	0	8.18679e-05	0	0	0	0	0	0	0	0	0	0	0	0
BC-0332773227	0	0	0	0	0	0	0	0	0	0	0	0	0	0	0	0	0	0	0	0	0	0	0	0	0
BC-0332773235	0	0	0	0	0	0	0	0	0	0	0	0	0	0	0	0	0	0	0	0	0	0	0	0	0
BC-0332773251	0	0	0	7.08396e-05	0	0	0	0	0	0	0	0	0	0	0	0	0	0	0	0	0	0	0	0	0
BC-0332773254	0	0	0	0	0	0	0	0	0	0	0	0	0	0	0	0	0.000136189	0	0	0	0	0	0	0	0
BC-0332773255	0	0	0	0	0	0	0	0	0	0	0	0	0	0	0	0	0	0	0	0	0	0	0	0	0
BC-0332773258	0	0	0	0	0	0	0	0	0	0	0	0	0	0	0	0	0	0	0	0	0	0	0	0	0
BC-0332773263	0	0	0	0	0	0	0	0	0	0	0	0	0	0	0	0	0	0	0	0	0	0	0	0	0
BC-0332773270	0	0	0	0	0	0	0	0	0	0	0	0	0	0	0	0	0	0	0	0.000116064	0	0	0	0	0
BC-0332773280	0.000226805	0	0	0	0	0	0	0	0	0	0	0	0	0	0	0	0	0	0	0	0	0	0	0	0
BC-0332773302	0.000495691	0	0	0	0	0	0	0	1.69757e-05	0	0	0	0	0	0	0	0	0	0	0.765666	0	0	0	0	0
BC-0332773384	0	0	0	0	0	0	0	0	0	0	0	0	0	0	0	0	0	0	0	0	0	0	0	0	0
BC-0332773387	0	0	0	0	0	0	0	0	0	0	0	0	0	0	0	0	0	0	0	0	0	0	0	0	0
BC-0332773393	0	0	0	0	0	0	0	0	0	0	0	0	0	0	0	0	0	0	0	0	0	0	0	0	0
BC-0332773401	0	0	0	0	0	0	0	0	0	0	0	0	0	0	0	0	0	0	0	0	0	0	0	0	0
BC-0332773415	0.000343084	0	0	0	0	0	0	0	3.83987e-05	3.25555e-05	0	0	0	0	0	0	0	0	0	0.905922	0	0	0	0	0
BC-0332773417	0	0	0	0	0	0	0	0	0	0	0	0	0	0	0	0	0	0	0	0	0	0	0	0	0
BC-0332773424	0	0	0	0	0	0	0	0	0	0	0	0	0	0	0	0	0	0	0	0	0	0	0	0	0
BC-0332773522	0	0	0	0	0	0	0	0	0	0	0	0	0	0	0	0	0	0	0	0	0	0	0	0	0
BC-0332773669	0	0	0	0	0	0	0	0	0.00020589	0	0	0	0	0	0	0	0	0	0	0	0	0	0	0	0
BC-0332773697	0	0	0	0	0	0	0	0	0	0	0	0	0	0	0	0	0	0	0	0.000103652	0	0	0	0	0
BC-0332773725	0	0	0	0	0	0	0	0	0	0	0	0	0	0	0	0	0	0	0.000100415	0	0	0	0	0	0
BC-0332773896	0	0	0	0	0	0	0	0	0	0	0	0	0	0	0	0	0	0	0	0	0	0	0	0	0
BC-0332773976	0	0	0	0	0	0	0	0	0	0	0	0	0	0	0	0	0	0	0	0.0040107	0	0	0	0	0
BC-0332774012	0	0	0	0	0	0	0	0	0	0	0	0	0	0	0	0	0	0	0.000165717	0	0	0	0	0	0
BC-0332774013	0	0	0	0	0	0	0	0	0	0	0	0	0	0	0	0	0	0	0	0	0	0	0	0	0
BC-0332774015	0	0	0	0	0	0	0	0	0	0	0	0	0	0	0	0	0	0	0	0	0	0	0	0	0
BC-0332774048	0.000478858	0	0	0	0	0	0	0	5.78372e-05	0	0	0	0	0	0	0	0	0	0	0.927332	0	0	0	0	0
BC-0332774165	0	0	0	0	0	0	0	0	0	0	0	0	0	0	0	0	0	0	0	0	0	0	0	0	0
BC-0332774167	0	0	0	0	0	0	0	0	0	0	0	0	0	0	0	0	0	0	0	0	0	0	0	0	0
BC-0332774173	0	0	0	0	0	0	0	0	0	0	0	0	0	0	0	0	0	0	0	0	0	0	0	0	0
BC-0332774174	0	0	0	0	0	0	0	0	0	0	0	0	0	0	0	0	0	0	0	0	0	0	0	0	0
BC-0332774182	0	0	0	0	0	0	0	0	0	0	0	0	0	0	0	0	0	0	0	0	0	0	0	0	0
BC-0332774198	0	0	0	0	0	0	0	0	0	0	0	0	0	0	0	0	0	0	0	0	0	0	0	0	0
BC-0332774201	0	0	0	0	0	0	0	0	0	0	0	0	0	0	0	0	0	0	0	0	0	0	0	0	0
BC-0332774207	0	0	0	0	0	0	0	0	0	0	0	0	0	0	0	0	0	0	0	0	0	0	0	0	0
BC-0332774208	0	0	0	0	0	0	0	0	0	0	0	0	0	0	0	0	0	0	0	0	0	0	0	0	0
BC-0332774209	0	0	0	0	0	0	0	0	0	0	0	0	0	0	0	0	0	0	0	0	0	0	0	0	0
BC-0332780254	0	0	0	0	0	0	0	0	0	0	0	0	0	0	0	0	0	0	0	0.000127695	0	0	0	0	0
BC-0338266589	0.000175273	0	0	0	0	0	0	0	0	0	0	0	0	0	0	0	0	0	0	0.0249676	0	0	0	0	0
BC-0338275832	0	0	0	0	0	0	0	0	0	0	0	0	0	0	0	0	0	0	0	0.00737055	0	0	0	0	0
BC-0338275852	0.000405125	0	0	0	0	0	0	0	0	0	0	0	0	0	0	0	0	0	0	0.959135	0	0	0	0	0
BC-0338275856	0	0	0	0	0	0	0	0	0	0	0	0	0	0	0	0	0	0	0	0.0295371	0	0	0	0	0
BC-0338275864	0	0	0	0	0	0	0	0	0	0	0	0	0	0	0	0	0	0	0	0.00568125	0	0	0	0	0
BC-0338275885	7.8634e-05	0	0	0	0	0	0	0	3.85844e-05	0	0	0	2.39321e-05	0	0	0	0	0	0	0.943426	0	0	0	0	0
BC-0338275887	0	0	0	0	0	0	0	0	0	0	0	0	0	0	0	0	0	0	0	0.0860221	0	0	0	0	0
BC-0338275888	0	0	0	0	0	0	0	0	0	0	0	0	0	0	0	0	0	0	0	0.0828461	0	0	0	0	0
BC-0338275904	0	0	0	0	0	0	0	0	0	0	0	0	0	0	0	0	0	0	0	0.00244084	0	0	0	0	0
BC-0338276128	0	0	0	0	0	0	0	0	0	0	0	0	0	0	0	0	0	0	0	0.00212821	0	0	0	0	0
BC-0338276132	0	0	0	0	0	0	0	0	0	0	0	0	0	0	0	0	0	0	0	0.0186433	0	0	0	0	0
BC-0338276147	0	0	0	0	0	0	0	0	0	0	0	0	0	0	0	0	0	0	0	0.197895	0	0	0	0	0
BC-0338276149	0.000124337	0	0	0	0	0	0	0	0	0	0	0	0	0	0	0	0	0	0	0.0789693	0	0	0	0	0
BC-0338276158	0	0	0	0	0	0	0	0	0	0	0	0	0	0	0	0	0	0	0	0.00609756	0	0	0	0	0
BC-0338276167	0.000202129	0	0	0	0	0	0	0	0	0	0	0	0	0	0	0	0	0	0	0.130427	0	0	0	0	0
BC-0338276169	0	0	0	0	0	0	0	0	0	0	0	0	0	0	0	0	0	0	0	0.00155218	0	0	0	0	0
BC-0338278314	0	0	0	0	0	0	0	0	0	0	0	0	0.000335161	0	0	0	0	0	0	0	0	0	0	0	0
BC-0338278315	0	0	0	0	0	0	0	0	0	0	0	0	0	0	0	0	0	0	0	0	0	0	0	0	0
BC-0338278316	0	0	0	0	0	0	0	0	0	0	0	0	0	0	0	0	0	0	0	0	0	0	0	0	0
BC-0338278328	0	0	0	0	0	0	0	0	0	0	0	0	0	0	0	0	0	0	0	0	0	0	0	0	0
BC-0338278342	0	0	0	0	0	0	0	0	0	0	0	0	0	0	0	0	0	0	0	0	0	0	0	0	0
BC-0338278349	0	0	0	0	0	0	0	0	0	0	0	0	0	0	0	0	0	0	0	0	0	0	0	0	0
BC-0338278359	0	0	0	0	0	0	0	0	0	0	0	0	0	0	0	0	0	0	0	0	0	0	0	0	0
BC-0338278368	0	0	0	0	0	0	0	0	0	0	0	0	0	0	0	0	0	0	0	0	0	0	0	0	0
BC-0338278392	0	0	0	0	0	0	0	0	0	0	0	0	0	0	0	0	0	0	0	0	0	0	0	0	0
BC-0338278398	0	0	0	0	0	0	0	0	0	0	0	0	0	0	0	0	0	0.00014766	0	0	0	0	0	0	0.000246099
BC-0338279183	0	0	0	0	0	0	0	0	0	0	0	0	0	0	0	0	0	0	0	0	0	0	0	0	0
BC-0338279222	0	0	0	0	0	0	0	0	0	0	0	0	0	0	0	0	0	0	0	0	0	0	0	0	0
BC-0338282494	0.000426477	0	0	0	0	0	0	0	0	0	0	0	0	0	0	0	0	0	0	0.230347	0	0	0	0	0
BC-0338282500	0	0	0	0	0	0	0	0	0	0	0	0	0	0	0	0	0	0	0	0.00552456	0	0	0	0	0
BC-0338282508	0	0	0	0	0	0	0	0	0	0	0	6.72821e-05	0	0	0	0	0	0	0	0.149272	0	0	0	0	0
BC-0338300753	0	0	0	0	0	0	0	0	0	0	0	0	0	0	0	0	0	0	0	0	0	0	0	0	0.00039615
BC-0338300929	0	0	0	0	0	0	0	0	0	0	0	0	0	0	0	0	0	0	0	0	0	0	0	0	0
BC-0338300937	0	0	0	0	0	0	0	0	0	0	0	0	0	0	0.000181308	0	0	0	0	0	0	0	0	0	0
BC-0338301042	0	0	0	0	0	0	0	0	0	0	0	0	0	0	0	0	0	0	0	0	0	0	0	0	0
BC-0338302380	0	0.000217152	0	0	0	0	0	0	0	0	0	0	0	0	0	0	0	0	0	0	0	0	0	0	0
BC-0338302381	0	0	0	0	0	0	0	0	0	0	0	0	0	0	0	0	0	0	0	0	0	0	0	0	0
BC-0338302386	0	0	0	0	0	0	0	0	0	0	0	0	0	0	0	0	0	0	0	0	0	0	0	0	0
BC-0338302393	0	0	0	0	0	0	0	0	0	0	0	0	0	0	0	0	0	0	0	0	0	0	0	0	0
BC-0338302411	0	0	0	0	0	0	0	0	0	0	0	0	0	0	0	0	0	0	0	0	0	0	0	0	0
BC-0338302412	0	0	0	0	0	0	0	0	0	0	0	0	0	0	0	0	0	0	0	0	0	0	0	0	0
BC-0338302415	0	0	0	0	0	0	0	0	0	0	0	0	0	0	0	0	0	0	0	0	0	0	0	0	0
BC-0338302416	0	0	0	0	0	0	0	0	0	0	0	0	0	0	0	0	0	0	0	0	0	0	0	0	0
BC-0338302417	0	0	0	0	0	0	0	0	0	0	0	0	0	0	0	0	0	0	0	0	0	0	0	0	0
BC-0338302420	0	0	0	0	0	0	0	0	0	0	0	0	0	0	0	0	0	0	0	0	0	0	0	0	0
BC-0338302422	0	0	0	0	0	0	0	0	0	0	0	0	0	0	0	0	0	0	0	0	0	0	0	0	0
BC-0338302435	0	0	0	0	0	0	0	0	0	0	0	0	0	0	0	0	0	0	0	0	0	0	0	0	0
BC-0338302437	0	0	0	0	0	0	0	0	0	0	0	0	0	0	0	0	0	0	0	0	0	0	0	0	0
BC-0338302445	0	0	0	0	0	0	0	0	0	0	0	0	0	0	0	0	0	0	0	0	0	0	0.000365033	0	0
BC-0338302451	0	0	0	0	0	0	0	0	0	0	0	0	0	0	0	0	0	0	0	0	0	0	0	0	0
BC-0338302462	0	0	0	0	0	0	0	0	0	0	0	0	0	0	0	0	0	0	0	0	0	0	0	0	0
BC-0338302463	0	0	0	0	0	0	0	0	0	0.000214909	0	0	0	0	0	0	0	0	0	0	0	0	0	0	0
BC-0338302473	0	0	0	0	0	0	0	0	0	0	0	0	0	0	0	0	0	0	0	0	0	0	0	0	0
BC-0338302572	0	0	0	0	0	0	0	0	0	0	0	0	0	0	0	0	0	0	0	0	0	0	0	0	0
BC-0338302573	0	0	0	0	0	0	0	0	6.06365e-05	0	0	0	0	0	0	0	0	0	0	0	0	0	0	0	0
BC-0338302582	0	0	0	0	0	0	0	0	0	0	0	0	0	0	0	0	0	0	0	0	0	0	0	0	0
BC-0338302583	0	0	0	0	0	0	0	0	0	0	0	0	0	0	0	0	0	0	0	0	0	0	0	0	0
BC-0338302597	0	0	0	0	0	0	0	0	0	0	0	0	0	0	0	0	0	0	0	0	0	0	0	0	0
BC-0338302607	0	0	0	0	0	0	0	0	0	0	0	0	0	0	0	0	0	0	0	0	0	0	0	0	0
BC-0338302611	0	0	0	0	0	0	0	0	0	0	0	0	0	0	0	0	0	0	0	0	0	0	0	0	0
BC-0338302614	0	0	0	0	0	0	0	0	0	0	0	0	0	0	0	0	0	0	0	0	0	0	0	0	0
BC-0338302615	0	0	0	0	0	0	0	0	0	0	0	0	0	0	0	0	0	0	0	0	0	0	0	0	0
BC-0338302616	0	0	0	0	0	0	0	0	0	0	0	0	0	0	0	0	0	0	0	0	0	0	0	0	0
BC-0338302619	0	0	0	0	0	0	0	0	0	0	0	0	0	0	0	0	0	0	0	0	0	0	0	0	0
BC-0338302621	0	0	0	0	0	0	0	0	0	0	0	0	0	0	0	0	0	0	0	0	0	0	0	0	0.000292559
BC-0338302628	0	0	0	0	0	0	0	0	0	0	0	0	0	0	0	0	0	0	0	0	0	0	0	0	0
BC-0338302635	0	0	0	0	0	0	0	0	0	0	0	0	0	0	0	0	0	0	0	0	0	0	0	0	0
BC-0338302642	0	0	0	0	0	0	0	0	0	0	0	0	0	0	0	0	0	0	0	0	0	0	0	0	0
BC-0338302644	0	0	0	0	0	0	0	0	0	0	0	0	0	0	0	0	0	0	0	0	0	0	0	0	0
BC-0338302646	0	0	0	0	0	0	0	0	0	0	0	0	0	0	0	0	0	0	0	0	0	0	0	0	0
BC-0338302650	0	0	0.000329723	0	0	0	0	0	0	0	0	0	0	0	0	0	0	0	0	0.00012212	0	0	0	0	0
BC-0338302651	0	0	0	0	0	0	0	0	0	0	0	0	0	0	0	0	0	0	0	0	0	0	0	0	0
BC-0338302652	0	0	0	0	0	0	0	0	0	0	0	0	0	0	0	0	0	0	0	0	0	0	0	0	0
BC-0338302657	0	0	0	0	0	0	0	0	0	0	0	0	0	0	0	0	0	0	0	0	0	0	0	0	0
BC-0338302739	0	0	0	0	0	0	0	0	0	0	0	0	0	0	0	0	0	0	0	0.364954	0	0	0	0	0
BC-0338302761	0	0	0	0	0	0	0	0	0.000504615	0	0	0	0	0	0	0	0	0	0	0.756407	0	0	0	0	0
BC-0338305465	0	0	0	0	0	0	0	0	0	0	0	0	0	0	0	0	0	0	0	0	0	0	0	0	0
BC-0338305525	0	0	0	0	0	0	0	0	0	0	0	0	0	0	0	0	0	0	0	0	0	0	0	0	0
BC-0338311298	0	0	0	0	0	0	0	0	0	0	0	0	0	0	0	0	0	0	0	0	0	0	0	0	0
BC-0338312231	0	0	0	0	0	0	0	0	0	0	0	0	0	0	0	0	0	0	0	0.0127206	0	0	0	0	0
BC-0338312232	0	0	0	0	0	0	0	0	0	0	0	0	0	0	0	0	0	0	0	0.0185952	0	0	0	0	0
BC-0338313252	0	0	0	0	0	0	0	0	0	0	0	0	0	0	0	0	0	0	0	0	0	0	0	0	0
BC-0338313260	0	0	0	0	0	0	0	0	0	0	0	0	0	0	0	0	0	0	0	0	0	0	0	0	0
BC-0338313271	0	0	0	0	0	0	0	0	0	0	0	0	0	0	0	0	0	0	0	0	0	0	0	0	0.00169267
BC-0338313285	0	0	0	0	0	0	0	0	0	0	0	0	0	0	0	0	0	0	0	0	0	0	0	0	0
BC-0338313769	0	0	0	0	0	0	0	0	0	0	0	0	0	0	0	0	0	0	0	0	0	0	0	0	0
BC-0338313772	0	0	0	0	0	0	0	0	0	0	0	0	0	0	0	0	0	0	0	0	0	0	0	0	0
BC-0338314157	0	0	0	0	0	0	0	0	3.08399e-05	0	0	0	0	0	0	0	0	0	0	0.00851182	0	0	0	0	0
BC-0338314170	0	0	0	0	0	0	0	0	0.0001095	0	0	0	0	0	0	0	0	0	0	0.0192889	0	0	0	0	0
BC-0338314296	0	0	0	0	0	0	0	0	0	0	0	0	0	0	0	0	0	0	0	0	0	0	0	0	0
BC-0338314310	0	0	0	0	0	0	0	0	0	0	0	0	0	0	0	0	0	0	0	0	0	0	0	0	0
BC-0338314329	0	0	0	0	0	0	0	0	0	0	0	0	0	0	0	0	0	0	0	0	0	0	0	0	0
BC-0338314341	0	0	0	0	0	0	0	0	0	0	0	0	0	0	0	0	0	0	0	0.000949542	0	0	0	0	0
BC-0338314349	0	0	0	0	0	0	0	0	0	0	0	0	0	0	0	0	0	0	0	0	0	0	0	0	0.00038977
BC-0338314351	0	0	0	0	0	0	0	0	0	0	0	0	0	0	0	0	0	0	0	0	0	0	0	0	0
BC-0338314358	0	0	0	0	0	0	0	0	0	0	0	0	0	0	0	0	0	0	0	0	0	0	0	0	0
BC-0338314950	0	0	0	0	0	0	0	0	0	0	0	0	0	0	0	0	0	0	0	0	0	0	0	0	0
BC-0338314958	0	0	0	0	0	0	0	0	0	0	0	0	0	0	0	0	0	0	0	0	0	0	0	0	0
BC-0338314965	0.000354244	0	0	0	0	0	3.17118e-05	0	0	0	0	0	0	0	0	0	0	0	0	0.942049	0	0	0	0	0
BC-0338314973	0	0	0	0	0	0	0	0	0	0	0	0	0	0	0	0	0	0	0	0	0	0	0	0	0
BC-0338314980	0	0	0	0	0	0	0	0	0	0	0	0	0	0	0	0	0	0	0	0	0	0	0	0	0
BC-0338314996	0	0	0	0	0	0	0	0	0	0	0	0	0	0	0	0	0	0	0	0	0	0	0	0	0
BC-0338314999	0	0	0	0	0	0	0	0	0	0	0	0	0	0	0	0	0	0	0	0	0	0	0	0	0
BC-0338315714	0	0	0	0	0	0	0	0	0	0	0	0	0	0	0	0	0	0	0	0	0	0	0	0	0
BC-0338315762	0	0	0	0	0	0	0	0	0	0	0	0	0	0	0	0	0	0	0	0	0	0	0	0	0
BC-0338316278	0	0	0	0	0	0	0	0	3.00582e-05	0.000486943	0	0	0	0	0	0	0	0	0	0.0077971	0	0	0	0	0
BC-0338317165	0	0	0	0	0	0	0	0	0	0	0	0	0	0	0	0	0	0	0	0	0	0	0	0	0
BC-0338317185	0	0	0	0	0	0	0	0	0	0	0	0	0	0	0	0	0	0	0	0	0	0	0	0	0
BC-0338317186	0	0	0	0	0	0	0	0	0	0	0	0	0	0	0	0	0	0	0	0	0	0	0	0	0
BC-0338317191	0	0	0	0	0	0	0	0	0	0	0	0	0	0	0	0	0	0	0	0	0	0	0	0	0
BC-0338317203	0	0	0	0	0	0	0	0	0	0	0	0	0	0	0	0	0	0	0	0	0	0	0	0	0
BC-0338317214	0	0	0	0	0	0	0	0	0	0	0	0	0	0	0	0	0	0	0	0	0	0	0	0	0
BC-0338317218	0	0	0	0	0	0	0	0	0	0	0	0	0	0	0	0	0.00029988	0	0	0	0	0	0	0	0
BC-0338317219	0	0	0	0	0	0	0	0	0	0	0	0	0	0	0	0	0	0	0	0	0	0	0	0	0
BC-0338317236	0	0	0	0	0	0	0	0	0	0	0	0	0	0	0	0	0	0	0	0	0	0	0	0	0
BC-0338318878	0.000347037	0	0	0	0	0	0	0	2.91628e-05	0	0	0	0	0	0	0	2.21637e-05	0	0	0.952311	0	0	0	0	0
BC-0338318897	0	0	0	0	0	0	0	0	0	0	0	0	0	0	0	0	0	0	0	0	0	0	0	0	0
BC-0338318900	0	0	0	0	0	0	0	0	0	0	0	0	0	0	0	0	0	0	0	0	0	0	0	0	0
BC-0338318919	0	0	0	0	0	0	0	0	0	0	0	0	0	0	0	0	0	0	0	0	0	0	0	0	0
BC-0338318926	0	0	0	0	0	0	0	0	0	0	0	0	0	0	0	0	0	0	0	0	0	0	0	0	0
BC-0338318958	0	0	0	0	0	0	0	0	0	0	0	0	0	0	0	0	0	0	0	0	0	0	0	0	0
BC-0338318962	0	0	0	0	0	0	0	0	0	0	0	0	0	0	0	0	0	0	0	0	0	0	0	0	0
BC-0338319001	0	0	0	0	0	0	0	0	0	0	0	0	0	0	0	0	0	0	0	0	0	0	0	0	0
BC-0338319003	0	0	0	0	0	0	0	0	0	0	0	0	0	0	0	0	0	0	0	5.82809e-05	0	0	0	0	0
BC-0338319004	0	0	0	0	0	0	0	0	0	0	0	0	0	0	0	0	0	0	0	0	0	0	0	0	0
BC-0338319007	0	0	0	0	0	0	0	0	0	0	0	0	0.000120496	0	0	0	0	0	0	0	0	0	0	0	0
BC-0338319012	0	0	0	0	0	0	0	0	0	0	0	0	0	0	0	0	0	0	0	0	0	0	0	0	0
BC-0338319017	0	0	0	0	0	0	0	0	0	0	0	0	0	0	0	0	0	0	0	0	0	0	0	0	0
BC-0338319023	0	0	0	0	0	0	0	0	0	0	0	0	0	0	0	0	0	0	0	0	0	0	0	0	0
BC-0338319030	0	0	0	0	0	0	0	0	0	0	0	0	0	0	0	0	0	0	0	0.07322	0	0	0	0	0
BC-0338319031	0	0	0	0	0	0	0	0	0	0	0	0	0	0	0	0	0	0	0	0	0	0	0	0	0
BC-0338319032	0	0	0	0	0	0	0	0	0	0	0	0	0	0	0	0	0	0	0	0.000224688	0	0	0	0	0
BC-0338319035	0	0	0	0	0	0	0	0	0	0	0	0	0	0	0	0	0	0	0	0	0	0	0	0	0
BC-0338319048	0	0	0	0	0	0	0	0	0	0	0	0	0	0	0	0	0	0	0	0	0	0	0	0	0
BC-0338319146	0	0	0	0	0	0	0	0	0	0	0	0	0	0	0	0	0	0	0	0	0	0	0	0	0
BC-0338319293	0	0	0	0	0	0	0	0	0	0	0	0	0	0	0	0	0	0	0	0	0	0	0	0	0
BC-0338319325	0.000246042	0	0	0	0	0	0	0	0	0	0	0	0	0	0	0	0	0	2.58991e-05	0.78867	0	0	0	0	0
BC-0338319363	0	0	0	0	0	0	0	0	0	0	0	0	0	0	0	0	0	0	0	0	0	0	0	0	0
BC-0338319389	0	0	0	0	0	0	0	0	0	0	0	0	0	0	0	0	0	0	0	0	0	0	0	0	0
BC-0338319390	0	0	0	0	0	0	0	0	0	0	0	0	0	0	0	0	0	0	0	0	0	0	0	0	0
BC-0338319612	0	0	0	0	0	0	0	0	0	0	0	0	0	0	0	0	0	0	0	0	0	0	0	0	0
BC-0338320008	0	0	0	0	0	0	0	0	0	0	0	0	0	0	0	0	0	0	0	0	0	0	0	0	0
BC-0338320013	0	0	0	0	0	0	0	0	0	0	0	0	0	0	0	0	0	0	0	0	0	0	0	0	0
BC-0338320218	0	0	0	0	0	0	0	0	0	0	0	0	0	0	0	0	0	0	0	0	0	0	0	0	0
BC-0338336566	0	0	0	0	0	0	0	0	0	0	0	0	0	0	0	0	0	0	0	0	0	0	0	0	0
BC-0338336600	0	0	0	0	0	0	0	0	0	0	0	0	0	0	0	0	0	0	0	0	0	0	0	0	0
BC-0338336980	0.000610348	0	0	0	0	0	0	0	2.31883e-05	0	0	0	0	0	0	0	0	0	2.81572e-05	0.928766	0	0	0	0	0
BC-0338339218	0	0	0	0	0	0	0	0	0	0	0	0	0	0	0	0	0	0	0	0	0	0	0	0	0
BC-0338339224	0	0	0	0	0	0	0	0	0	0	0	0	0	0	0	0	0	0	0	0	0	0	0.0011788	0	0
BC-0338339229	0	0	0	0	0	0	0	0	0	0	0	0	0	0	0	0	0	0	0	0	0	0	0	0	0
BC-0338339230	0	0	0	0	0	0	0	0	0	0	0	0	0	0	0	0	0	0	0	0	0	0	0	0	0
BC-0338339235	0	0	0	0	0	0	0	0	0	0	0	0	0	0	0	0	0	0	0	0	0	0	0	0	0
BC-0338339248	0	0	0	0	0	0	0	0	0	0	0	0	0	0	0	0	0	0	0	0	0	0	0	0	0
BC-0338339257	0	0	0	0	0	0	0	0	0	0	0	0	0	0	0	0	0	0	0	0	0	0	0	0	0
BC-0338339276	0	0	0	0	0	0	0	0	0	0	0	0	0	0	0	0	0	0	0	0	0	0	0	0	0
BC-0338339286	0	0	0	0	0	0	0	0	0	0	0	0	0	0	0	0	0	0	0	0	0	0	0	0	0
BC-0338339289	0	0	0	0	0	0	0	0	0	0	0	0	0	0	0	0	0	0	0	0	0	0	0	0	0.00032381
BC-0338339295	0	0	0	0	0	0	0	0	0	0	0	0	0	0	0	0	0	0	0	0	0	0	0	0	0
BC-0338339296	0	0	0	0	0	0	0	0	0	0	0	0	0	0	0	0	0	0	0	0	0	0	0	0	0
BC-0338339329	0	0	0	0	0	0	0	0	0	0	0	0	0	0	0	0	0	0	0	0	0	0	0	0	0
BC-0338339332	0	0	0	0	0	0	0	0	0	0	0	0	0	0	0	0	0	0	0	0	0	0	0	0	0
BC-0338339338	0	0	0	0	0	0	0	0	0	0	0	0	0	0	0	0	0	0	0	0	0	0	0	0	0
BC-0338339346	0	0	0	0	0	0	0	0	0	0	0	0	0	0	0	0	0	0	0	0	0	0	0	0	0
BC-0338339347	0	0	0	0	0	0	0	0	0	0	0	0	0	0	0	0	0	0	0	0	0	0	0	0	0
BC-0338339362	0	0	0	0	0	0	0	0	0	0	0	0	0	0	0	0	0	0	0	0	0	0	0	0	0
BC-0338339366	0	0	0	0	0	0	0	0	0	0	0	0	0	0	0	0	0	0	0	0	0	0	0	0	0.00148512
BC-0338339374	0	0	0	0	0	0	0	0	0	0	0	0	0	0	0	0	0	0	0	0	0	0	0	0	0
BC-0338339381	0	0	0	0	0	0	0	0	0	0	0	0	0	0	0	0	0	0	0	0	0	0	0	0	0
BC-0338339382	0	0	0	0	0	0	0	0	0	0	0	0	0	0	0	0	0	0	0	0	0	0	0	0	0
BC-0338339385	0	0	0	0	0	0	0	0	0	0	0	0	0	0	0	0	0	0	0	0	0	0	0	0	0
BC-0338339453	0	0	0	0	0	0	0	0	0	0	0	0	0	0	0	0	0	0	0	0	0	0	0	0	0
BC-0338339469	0	0	0	0	0	0	0	0	0	0	0	0	0	0	0	0	0	0	0	0	0	0	0	0	0
BC-0338339475	0	0	0	0	0	0	0	0	0	0	0	0	0	0	0	0	0	0	0	0	0	0	0	0	0
BC-0338339479	0	0	0	0	0	0	0	0	0	0	0	0	0	0	0	0	0	0	0	0	0	0	0	0	0
BC-0338339485	0	0	0	0	0	0	0	0	0	0	0	0	0	0	0	0	0	0	0	0	0	0	0	0	0
BC-0338339488	0	0	0	0	0	0	0	0	0	0	0	0	0	0	0	0	0	0	0	0	0	0	0	0	0
BC-0338339711	0	0	0	0	0	0	0	0	0	0	0	0	0	0	0	0	0	0	0	0	0	0	0	0	0
BC-0345232846	0	0	0	0	0	0	0	0	0	0	0	0	0	0	0	0	0	0	0	0	0	0	0	0	0
BC-0345232869	0	0	0	0	0	0	0	0	0	0	0	0	0	0	0	0	0	0	0	0	0	0	0	0	0
BC-0345235109	0	0	0	0	0	0	0	0	0	0	0	0	0	0	0	0	0	0	0	0	0	0	0	0	0
BC-0345235111	0	0	0	0	0	0	0	0	0	0	0	0	0	0	0	0	0	0	0	0.0018982	0	0	0	0	0
BC-0345235119	0	0	0	0	0	0	0	0	0	0	0	0	0	0	0	0	0	0	0	0	0	0	0	0	0
BC-0345235121	0	0	0	0	0	0	0	0	0	0	0	0	0	0	0	0	0	0	0	0	0	0	0	0	0
BC-0345235127	0	0	0	0	0	0	0	0	0	0	0	0	0	0	0	0	0	0	0	0	0	0	0	0	0
BC-0345235128	0	0	0	0	0	0	0	0	0	0	0	0	0	0	0	0	0	0	0	0	0	0	0	0	0
BC-0345235136	0	0	0	0	0	0	0	0	0	0	0	0	0	0	0	0	0	0	0	0	0	0	0	0	0
BC-0345235145	0	0	0	0	0	0	0	0	0	0	0	0	0	0	0	0	0	0	0	0	0	0	0	0	0
BC-0345235152	0	0	0	0	0	0	0	0	0	0	0	0	0	0	0	0	0	0	0	0	0	0	0	0	0
BC-0345235158	0	0	0	0	0	0	0	0	0	0	0	0	0	0	0	0	0	0	0	0	0	0	0	0	0
BC-0345235162	0.000147263	0	0	0	0	0	0	0	0	0	0	0	0	0	0	0	0	0	0	0	0	0	0	0	0
BC-0345235170	0	0	0	0	0	0	0	0	0	0	0	0	0	0	0	0	0	0	0	0	0	0	0	0	0
BC-0345235174	0	0	0	0	0	0	0	0	0	0	0	0	0	0	0	0	0	0	0	0	0	0	0	0	0
BC-0345235178	0	0	0	0	0	0	0	0	0	0	0	0	0	0	0	0	0	0	0	0	0	0	0	0	0
BC-0345235181	0	0	0	0	0	0	0	0	0	0	0	0	0	0	0	0	0	0	0	0	0	0	0	0	0
BC-0345235182	0	0	0	0	0	0	0	0	0	0	0	0	0	0	0	0	0	0	0	0	0	0	0	0	0
BC-0345235185	0	0	0	0	0	0	0	0	0	0	0	0	0	0	0	0	0	0	0	0	0	0	0	0	0
BC-0345235186	0	0	0	0	0	0	0	0	0	0	0	0	8.51209e-05	0	0	0	0	0	0	0	0	0	0	0	0
BC-0345250127	0	0	0	0	0	0	0	0	0	0	0	0	0	0	0	0	0	0	0	0	0	0	0	0	0
BC-0345257166	0	0	0	0	0	0	0	0	0	0	0	0	0	0	0	0	0	0	0	0	0	0	0	0	0
BC-0345269801	0	0	0	0	0	0	0	0	0	0	0	0	0	0	0	0	0	0	0	0	0	0	0	0	0
BC-0345269826	0	0	0	0	0	0	0	0	0	0	0	0	0	0	0	0	0	0	0	0.873073	0	0	0	0	0
BC-0345270195	0	0	0	0.00605862	0	0	0	0	0	0	0	0	0	0	0	0	0	0	0	0	0	0	0	0	0
BC-0345270217	0	0	0	0	0	0	0	0	0	0	0	0	0	0	0	0	0	0	0	0	0	0	0.000511893	0	0
BC-0345270222	0	0	0	0	0	0	0	0	0	0	0	0	0	0	0	0	0	0	0	0	0	0	0	0	0
BC-0345270816	0	0	0	0	0	0	0	0	0	0	0	0	0	0	0	0	0	0	0	0	0	0	0	0	0
BC-0345270821	0	0	0	0	0	0	0	0	0.00287479	0	0	0	0.00111797	0	0	0	0	0	0	0	0	0	0	0	0
BC-0345270823	0	0	0	0	0	0	0	0	0	0	0	0	0	0	0	0	0	0	0	0.000777015	0	0	0	0	0
BC-0345270830	0	0	0	0	0	0	0	0	0	0	0	0	0	0	0	0	0	0	0	0	0	0	0	0	0
BC-0345270831	0	0	0	0.00015801	0	0	0	0	0	0	0	0	0	0	0	0	0	0	0	0	0	0	0	0	0
BC-0345270838	0	0	0	0	0	0	0	0	0	0	0	0	0	0	0	0	0	0	0	0	0	0	0	0	0
BC-0345270839	0.000422081	0	0	0	0	0	0	0	0.000126236	0	0	0	0	8.41572e-06	0	0	0	0	5.6968e-05	0.957363	0	0	0	0	0
BC-0345270848	0.000396613	0	0	0	0	0	0.000226636	0	0	0	0	0	0	0	0	0	0	0	0	0.713859	0	0	0	0	0
BC-0345270855	0	0	0	0	0	0	0	0	0	0	0	0	0	0	0	0	0	0	0	0	0	0	0	0	0
BC-0345270857	0	0	0	0	0	0	0	0	0	0	0	0	0	0	0	0	0	0	0	0	0	0	0	0	0
BC-0345270861	0	0	0	0	0	0	0	0	0	0	0	0	0	0	0	0	0	0	0	0	0	0	0	0	0
BC-0345270867	0.000412366	0	0	0	0	0	0	0	0	0	0	0	0	0	0	0	0	0	0.000103091	0.65032	0	0	0	0	0.000322161
BC-0345270868	0	0	0	0	0	0	0	0	0	0	0	0	0	0	0	0	0	0	0	0	0	0	0	0	0
BC-0345270878	0	0	0	0	0	0	0	0	0	0	0	0	0	0	0	0	0	0	0	0	0	0	0	0	0
BC-0345270889	0.000432343	0	0	0	0	0	0	0	5.69872e-05	0	3.64718e-05	0	0	0	0	0	1.36769e-05	0	0	0.950482	0	0	0	0	0
BC-0345270890	0	0	0	0	0	0	0	0	0	0.00287455	0	0	0	0	0	0	0	0	0	0.000256768	0	0	0	0	0
BC-0345270893	0	0	0	0	0	0	0	0	0	0	0	0	0	0	0	0	0	0	0	0.847317	0	0	0	0	0
BC-0345271617	0.000437078	0	0	0.000335432	0	0	0	0	0	0	0	0	0	0	0	0	0	0	0.000406585	0.677695	0	0	0	0	0
BC-0345271649	0	0	0	0	0	0	0	0	0	6.72556e-05	0	0	0	0	0	0	0	0	0	0	0	0	0	0	0
BC-0345271661	0	0	0	0	0	0	0	0	0	0	0	0	0	0	0	0	0	0	0	0	0	0	0	0	0
BC-0345272052	0	0	0	0	0	0	0	0	0	0	0	0	0	0	0	0	0	0	0	0.000299116	0	0	0	0	0
BC-0345272061	0	0	0	0	0	0	0	0	0	0	0	0	0	0	0	0	0	0	0	0	0	0	0	0	0
BC-0345272068	0	0	0	0	0	0	0	0	0	0	0	0	0	0	0	0	0	0	0	7.80439e-05	0	0	0	0	0
BC-0345272079	0	0	0	0	0	0	0	0	0	0	0	0	0	0	0	0	0	0	0	0	0	0	0	0	0
BC-0345272081	0	0	0	0	0	0	0	0	0	0	0	0	0	0	0	0	0	0	0	0	0	0	0	0	0
BC-0345272101	0	0	0	0	0	0	0	0	0	0	0	0	0	0	0	0	0.00133333	0	0	0	0	0	0	0	0
BC-0345272119	0	0	0	0	0	0	0	0	0	0	0	0	0	0	0	0	0	0	0	0	0	0	0	0	0
BC-0345272136	0	0	0	0	0	0	0	0	0	0	0	0	0	0	0	0	0	0	0	0	0	0	0	0	0
BC-0345272138	0	0	0	0	0	0	0	0	0	0	0	0	0	0	0	0	0	0	0	0	0	0	0	0	0
BC-0345272342	0	0	0	0	0	0	0	0	0	0	0	0	0	0	0	0	0	0	0	0	0	0	0	0	0
BC-0345272349	0	0	0	0	0	0	0	0	0	0	0	0	0	0	0	0	0	0	0	0	0	0	0	0	0
BC-0345272351	0	0	0	0	0	0	0	0	0	0	0	0	0	0	0	0	0	0	0	0	0	0	0	0	0
BC-0345272364	0	0	0	0	0	0	0	0	0	0	0	0	0	0	0	0	0	0	0	0	5.25102e-05	0	0	0	0
BC-0345272370	0	0	0	0	0	0	0	0	0	0	0	0	0	0	0	0	0	0	0	0	0	0	0	0	0
BC-0345272371	0	0	0	0	0	0	0	0	0	0	0	0	0	0	0	0	0	0	0	0	0	0	0	0	0
BC-0345272374	0	0	0	0	0	0	0	0	0	0	0	0	0	0	0	0	0	0	0	0	0	0	0	0	0
BC-0345272379	0	0	0	0	0	0	0	0	0	0	0	0	0	0	0	0	0	0	0	0	0	0	0	0	0
BC-0345272383	0	0	0	0	0	0	0	0	0	0	0	0	0	0	0	0	0	0	0	0	0	0	0	0	0
BC-0345272388	0	0	0	0	0	0	0	0	0.000123512	0	0	0	0	0	0	0	0	0	0	0	0	0	0	0	0
BC-0345272391	0	0	0	0	0	0	0	0	0	0	0	0	0	0	0	0	0	0	0	0	0	0	0	0	0
BC-0345272396	0	0	0	0	0	0	0	0	0	0	0.000247557	0	0	0	0	0	0	0	0	0	0	0	0	0	0
BC-0345272399	0	0	0	0	0	0	0	0	0	0	0	0	0	0	0	0	0	0	0	0	0	0	0	0	0
BC-0345272402	0	0	0	0	0	0	0	0	0	0	0	0	0	0	0	0	0	0	0	0	0	0	0	0	0
BC-0345272410	0	0	0	0	0	0	0	0	0	0	0	0	0	0	0	0	0	0	0	0	0	0	0	0	0
BC-0345272425	0	0	0	0	0	0	0	0	0	0	0	0	0	0	0	0	0	0	0	4.41665e-05	0	0	0	0	0
BC-0345272427	0	0	0	0	0	0	0	0	0	0	0	0	0	0	0	0	0	0	0	0	0	0	0	0	0
BC-0345272478	0	0	0	0	0	0	0	0	0	0	0	0	0	0	0	0	0	0	0	0	0	0	0	0	0
BC-0345272561	0	0	0	0	0	0	0	0	0	0	0	0	0	0	0	0	0	0	0	0	0	0	0	0	0
BC-0345272577	0	0	0	0	0	0	0	0	0	0	0	0	0	0	0	0	0	0	0	7.31149e-05	0	0	0	0	0
BC-0345272582	0	0	0	0	0	0	0	0	0	0	0	0	0	0	0	0	0	0	0	0.487811	0	0	0	0	0
BC-0345272595	0	0	0	0	0	0	0	0	0	0	0	0	0	0	0	0	0	0	0	0	0	0	0	0	0
BC-0345272609	0	0	0	0	0	0	0	0	0	0	0	0	0	0	0	0	0	0	0	2.03738e-05	0	0	0	0	0
BC-0345273202	0	0	0	0	0	0	0	0	0	0	0	0	0	0	0	0	0	0	0	0.772382	0	0	0	0	0
BC-0345273215	0	0	0	0	0	0	0	0	0	0	0	0	0	0	0	0	0	0	0	4.86108e-05	0	0	0	0	0
BC-0345273217	0	0	0	0	0	0	0	0	0	0.000237109	0	0	0	0	0	0	0	0	0	0	0	0	0	0	0
BC-0345273271	0	0	0	0	0	0	0	0	0	0	0	0	0	0	0	0	0	0	0	0	0	0	0	0	0
BC-0345273701	0	0	0	0	0	0	0	0	0	0	0	0	0	0	0	0	0	0	0	0	0	0	0	0	0
BC-0345273737	0	0	0	0	0	0	0	0	0	0	0	0	0	0	0	0	0	0	0	0	0	0	0	0	0
BC-0345278401	0	0	0	0	0	0	0	0	0	0	0	0	0	0	0	0	0	0	0	0	0	0	0	0	0
BC-0345278406	0	0	0	0	0	0	0	0	0	0	0	0	0	0	0	0	0	0	0	0.695173	0	0	0	0	0
BC-0345278438	0	0	0	0	0	0	0	0	0	0	0	0	0	0	0	0	0	0	0	0	0	0	0	0	0
BC-0345278447	0.000939174	0	0	0	0	0	0.000273702	0	0	0	0	0	0	0	0	0	0	0	0	0.717019	0	0	0	0	0
BC-0345278463	0	0	0	0	0	0	0	0	0	0	0	0	0	0	0	0	0	0	0	0	0	0	0	0	0
BC-0345278475	0	0	0	0	0	0	0	0	0	0	0	0	0	0	0	0	0	0	0	0.866955	0	0	0	0	0
BC-0345278481	0	0	0	0	0	0	0	0	0	0	0	0	0.000786737	0	0	0	0.000585255	0	0	0	0	0	0	0	0
BC-0345296158	0	0	0	0	0	0	0	0	0	0	0	0	0	0	0	0	0	0	0	0	0	0	0	0	0
BC-0345296163	0	0	0	0	0	0	0	0	0	0	0	0	0	0	0	0	0	0	0	0	0	0	0	0	0.00425331
BC-0345296222	0	0	0	0	0	0	0	0	0	0	0	0	0	0	0	0	0	0	0	0	0	0	0	0	0
BC-0345296437	0	0	0	0	0	0	0	0	0	0	0	0	0	0	0	0	0	0	0	0	0	0	0	0	0
BC-0345296467	0.000325064	0	0	0	0	0	0	0	0	0	0	0	0	0	0	0	0	0	0	0.74093	0	0	0	0	0
BC-0345296473	0	0	0	0	0	0	0	0	0	0	0	0	0	0	0	0	0	0	0	0	0	0	0	0	0
BC-0345296480	0.000165735	0	0	0	0	0	0	0	0	0	0	0	0	0	0	0	0	0	0	0.396647	0	0	0	0	0
BC-0345296493	0	0	0	0	0	0	0	0	0	0	0	0	0	0	0	0	0	0	0	0	0	0	0	0	0
BC-0345296503	0	0	0	0	0	0	0	0	0	0	0	0	0	0	0	0	0	0	0	0.000151954	0	0	0	0	0
BC-0345296507	0	0	0	0	0	0	0	0	0	0	0	0	0	0	0	0	0	0	0	0	0	0	0	0	0
BC-0345296511	0	0	0	0	0	0	0	0	0	0	0	0	0	0	0	0	0	0	0	0	0	0	0	0	0
BC-0345296518	0	0	0	0	0	0	0	0	0	0	0	0	0	0	0	0	0	0	0	0	0	0	0	0	0
BC-0345296636	0	0	0	0	0	0	0	0	0	0	0	0	0	0	0	0	0	0	0	0.000519356	0	0	0	0	0
BC-0345296639	0	0	0	0	0	0	0	0	0	0	0	0	0	0	0	0	0	0	0	0	0	0	0	0	0
BC-0345296647	0	0	0	0	0	0	0	0	0	0	0	0	0	0	0	0	0	0	0	0	0	0	0	0	0
BC-0345296652	0	0	0	0	0	0	0	0	0	0	0	0	0	0	0	0	0	0	0	0.883458	0	0	0	0	0
BC-0345296658	0	0	0	0	0	0	0	0	0	0	0	0	0	0	0	0	0	0	0	0.152092	0	0	0	0	0
BC-0345296661	0	0	0	0	0	0	0	0	0	0	0	0	0	0	0	0	0	0	0	0.00145574	0	0	0	0	0
BC-0345296676	0	0	0	0	0	0	0	0	0	0	0	0	0	0	0	0	0	0	0	0.870125	0	0	0	0	0
BC-0345296678	0	0	0	0	0	0	0	0	0	0	0	0	0	0	0	0	0	0	0	0.00042127	0	0	0	0	0
BC-0345296681	0	0	0	0	0	0	0	0	0	0	0	0	0	0	0	0	0	0	0	0.659193	0	0	0	0	0
BC-0345296686	0	0	0	0	0	0	0	0	0	0	0	0	0	0	0	0	0	0	0	0	0	0	0	0	0.00272204
BC-0345296690	0	0	0	0	0	0	0	0	0	0	0	0	0	0	0	0	0	0	0	0	0	0	0	0	0
BC-0345296697	0	0	0	0	0	0	0	0	0	0	0	0	0	0	0	0	0	0	0	0	0	0	0	0	0
BC-0345296702	0	0	0	0	0	0	0	0	0	0	0	0	0	0	0	0	0	0	0	0	0	0	0	0	0
BC-0345296709	0	0	0	0	0	0	0	0	0	0	0	0	0	0	0	0.000409417	0	0	0	0	0	0	0	0	0
BC-0345296711	0.00020432	0	0	0	0	0	0	0	0	0	0	0	0	0	0	0	0	0	0.000408639	0.748139	0	0	0	0	0
BC-0345296714	0.000521289	0	0	0	0	0	0	0	0	0	0	0	0	0	0	0	0	0	0	0.622794	0	0	0	0	0
BC-0345297432	0	0	0	0	0	0	0	0	0	0	0	0	0	0	0	0	0	0	0	0	0	0	0	0	0
BC-0345297676	0	0	0	0	0	0	0	0	0	0	0	0	0	0	0	0	0	0	0	0	0	0	0	0	0
BC-0345297689	0	0	0	0	0	0	0	0	0	0	0	0	0	0	0	0	0	0	0	0	0	0	0	0	0
BC-0345297690	0	0	0	0	0	0	0	0	0	0	0	0	0	0	0	0	0	0	0	0	0	0	0	0	0
BC-0345297693	0	0	0	0	0	0	0	0	0	0	0	0	0	0	0	0	0	0	0	0.000124678	0	0	0	0	0
BC-0345297694	0	0	0	0	0	0	0	0	0	0	0	0	0	0	0	0	0	0	0	0.000247543	0	0	0	0	0
BC-0345297698	0	0	0	0	0	0	0	0	0	0	0	0	0	0	0	0	0	0	0	0	0	0	0	0	0
BC-0345297701	0	0	0	0	0	0	0	0	0	0	0	0	0	0	0	0	0	0	0	0	0	0	0	0	0
BC-0345297707	0	0	0	0	0	0	0	0	0.000606526	0	0	0	0	0	0	0	0	0	0	0	0	0	0	0	0
BC-0345297714	0	0	0	0	0	0	0	0	0	0	0	0	0	0	0	0	0	0	0	0.724716	0	0	0	0	0
BC-0345297715	0.000162388	0	0	0	0	0	0	0	0	0	0	0	0	0	0	0	0	0	0	0.617318	0	0	0	0	0
BC-0345297718	0	0	0	0	0	0	0	0	0	0	0	0	0	0	0	0	0	0	0	0.000431414	0	0	0	0	0
BC-0345297724	0	0	0	0	0	0	0	0	0	0	0	0	0	0	6.55242e-05	0	0	0	0	0	0	0	0	0	0
BC-0345297727	0	0	0	0	0	0	0	0	0.00324984	0	0	0	0	0	0	0	0	0	0	0.00150602	0	0	0	0	0
BC-0345297736	0	0	0	0	0	0	0	0	0	0	0	0	0	0	0	0	0	0	0	0	0	0	0	0	0
BC-0345297755	0	0	0	0	0	0	0	0	0	0	0	0	0	0	0	0	0	0	0	0.71129	0	0	0	0	0
BC-0345297763	0.000519626	0	0	0	0	0	0	0	0	0	0	0	0	0	0	0	0	0	0	0.614091	0	0	0	0	0
BC-0345298339	0	0	0	0	0	0	0	0	0	0	0	0	0	0	0	0	0	0	0	0	0	0	0	0	0
BC-0345298860	0	0	0	0	0	0	0	0	0	0	0	0	0	0	0	0	0	0	0	0	0	0	0	0	0
BC-0345298877	0	0	0	0	0	0	0	0	0	0	0	0	0.000186265	0	0	0	0	0	0	0	0	0	0	0	0
BC-0345299115	0	0	0	0	0	0	0	0	0	0	0	0	0	0	0	0	0	0	0	0	0	0	0	0	0
BC-0345299117	0	0	0	0	0	0	0	0	0	0	0	0	0	0	0	0	0	0	0	0	0	0	0	0	0
BC-0345299118	0	0	0	0	0	0	0	0	0	0	0	0	0	0	0	0	0	0	0	0	0	0	0	0	0
BC-0345299128	0	0	0	0	0	0	0	0	0	0	0	0	0	0	0	0	0	0	0	0	0	0	0	0	0
BC-0345299134	0.000697134	0	0	0	0	0	0	0	0	0	0	0	0	0	0	0	0	0	0	0.671037	0	0	0	0	0
BC-0345299135	0	0	0	0	0	0	0	0	0	0.00031915	0	0	0	0	0	0	0	0	0	0	0	0	0	0	0
BC-0345299136	0	0	0	0	0	0	0	0	0.00696398	0	0	0	0	0	0	0	0	0	0	0.00106922	0	0	0	0	0
BC-0345299138	0	0	0	0	0	0	0	0	0	0	0	0.00227531	0	0	0	0	0	0	0	0	0	0	0	0	0
BC-0345299144	0.000754057	0	0	0	0	0	0	0	0	0	0	0	0	0	0	0	0	0	0	0.729862	0	0	0	0	0
BC-0345299148	0	0	0	0	0	0	0	0	0	0	0	0	0	0	0	0	0	0	0	0	0	0	0	0	0.00399023
BC-0345299155	0	0	0	0	0	0	0	0	0	0	0	0	0	0	0	0	0	0	0	0	0	0	0	0	0
BC-0345299159	0	0	0	0	0	0	0	0	0	0	0	0	0	0	0	0	0	0	0	0	0	0	0	0	0
BC-0345299161	0	0	0	0	0	0	0	0	0	0	0	0	0	0	0	0	0	0	0	0.00294811	0	0	0	0	0
BC-0345299165	0	0	0	0	0	0	0	0	0	0	0	0	0	0	0	0	0	0	0	0	0	0	0	0	0
BC-0345299166	0	0	0	0	0	0	0	0	0	0	0	0	0	0	0	0	0	0	0	0.0002292	0	0	0	0	0
BC-0345299168	0	0	0	0	0	0	0	0	0	0	0	0	0	0	0	0	0	0	0	0.000121539	0	0	0	0	0
BC-0345299174	0	0	0	0	0	0	0	0	0	0	0	0	0	0	0	0	0	0	0	0	0	0	0	0	0
BC-0345299179	0	0	0	0	0	0	0	0	0	0	0	0	0	0	0	0	0	0	0	0	0	0	0	0	0
BC-0345299188	0.00121518	0	0	0	0	0	0	0	0	0	0	0	0	0	0	0	0	0	0	0.674476	0	0	0	0	0
BC-0345299189	0	0	0	0	0	0	0	0	0	0	0	0	0.00455984	0	0	0	0	0	0	0	0	0	0	0	0
BC-0345299190	0	0	0	0	0	0	0	0	0.00328746	0	0	0	0.00261882	0	0	0	0	0	0	0	0	0	0	0	0
BC-0345299193	0	0	0	0	0	0	0	0	0	0	0	0	0	0	0	0	0	0	0	0	0	0	0	0	0
BC-0345299197	0	0	0	0	0	0	0	0	0	0	0	0	0	0	0	0	0	0	0	0.67949	0	0	0	0	0.00034829
BC-0345299198	0	0	0	0	0	0	0	0	0	0	0	0	0	0	0	0	0	0	0	0	0	0	0	0	0.000966645
BC-0345299203	0	0	0	0	0	0	0	0	0	0	0	0	0	0	0	0	0	0	0	0	0	0	0	0	0
BC-0345299206	0	0	0	0	0	0	0	0	0	0	0	0	0	0	0	0	0	0	0	5.83689e-05	0	0	0	0	0
BC-0345299289	0	0	0	0	0	0	0	0	0	0	0	0	0	0	0	0	0	0	0	0	0	0	0	0	0
BC-0345299303	0	0	0	0	0	0	0	0	0	0	0	0	0	0	0	0	0	0	0	0	0	0	0	0	0
BC-0345299304	0	0	0	0	0	0	0	0	0	0	0	0	0	0	0	0	0	0	0	0	0	0	0	0	0
BC-0345299506	0	0	0	0	0	0	0	0	0	0	0	0	0	0	0	0	0	0	0	0	0	0	0	0	0
BC-0345299508	0	0	0	0	0	0	0	0	0	0	0	0	0	0	0	0	0	0	0	0	0	0	0	0	0.000788453
BC-0345299509	0.00147416	0	0	0	0	0	0	0	0	0	0	0	0	0	0	0	0	0	0	0.853689	0	0	0	0	0
BC-0345299575	0	0	0	0	0	0	0	0	0	0	0	0	0	0	0	0	0	0	0	0	0	0	0	0	0
BC-0345299577	0	0	0	0	0	0	0	0	0	0	0	0	0	0	0	0	0	0	0	0	0	0	0	0	0
BC-0345300199	0	0	0	0	0	0	0	0	0	0	0	0	0	0	0	0	0	0	0	0	0	0	0	0	0
BC-0345300257	0	0	0	0.000313093	0	0	0	0	0	0	0	0	0	0	0	0	0	0	0	0	0	0	0	0	0
BC-0345300460	0	0	0	0	0	0	0	0	0	0	0	0	0	0	0	0	0	0	0	0	0	0	0	0	0
BC-0345300461	0	0	0	0	0	0	0	0	0	0	0	0	0	0	0	0	0	0	0	0	0	0	0	0	0
BC-0345300480	0	0	0	0	0	0	0	0	0	0	0	0	0	0	0	0	0	0	0	0	0	0	0	0	0
BC-0345300488	0	0	0	0	0	0	0	0	0	0	0	0	0	0	0	0	0	0	0	0	0	0	0	0	0
BC-0345300517	0	0	0	0	0	0	0	0	0	0	0	0	0	0	0	0	0	0	0	0	0	0	0	0	0
BC-0345300519	0.000124111	0	0	0	0	0	0	0	0	0	0	0	0	0	0	0	0	0	0	0	0	0	0	0	0
BC-0345300532	0.000539373	0	0	0	0	0	0	0	0	0	0	0	0	0	0	0	0	0	0	0.723723	0	0	0	0	0
BC-0345300547	0	0	0	0	0	0	0	0	0	0.000159702	0	0	0	0	0	0	0	0	0	0.000117115	0	0	0	0	0
BC-0345309196	0	0	0	0	0	0	0	0	0	0	0	0	0	0	0	0	0	0	0	0	0	0	0	0	0
BC-0345309204	0	0	0	0	0	0	0	0	5.71999e-05	0	0	0	0	0	0	0	0	0	0	0	0	0	0.000118213	0	0
BC-0345309205	0	0	0	0	0	0	0	0	0	0.000199384	0	0	0	0	0	0	0	0	0	0	0	0	0	0	0
BC-0345309207	0	0	0	0	0	0	0	0	0	0	0	0	0	0	0	0	0	0	0	0	0	0	0	0	0
BC-0345309214	0	0	0	0	0	0	0	0	0	0	0	0	0	0	0	0	0	0	0	0	0	0	0	0	0
BC-0345309218	0	0	0	0	0	0	0	0	0	0	0	0	0	0	0	0	0	0	0	0	0	0	0	0	0
BC-0345309221	0	0	0	0	0	0	0	0	0	0	0	0	0	0	0	0	0	0	0	0	0	0	0	0	0
BC-0345309228	0	0	0	0	0	0	0	0	0	0	0	0	0	0	0	0	0	0	0	0	0	0	0	0	0
BC-0345309230	0	0	0	0	0	0	0	0	0	0	0	0	0	0	0	0	0	0	0	0	0	0	0	0	0
BC-0345309235	0	0	0	0	0	0	0	0	0	0	0	0	0	0	0	0	0	0	0	0	0	0	0	0	0
BC-0345309237	0.000359813	0	0	0	0	0.000151921	0	0	0	0	0	0	0	0	0	0	0	0	0	0	0	0	0	0	0
BC-0345309239	0	0	0	0	0	0	0	0	0	0	0	0	0	0	0	0	0	0	0	0	0	0	0	0	5.66089e-05
BC-0345309245	0	0	0	0	0	0	0	0	0	0	0	0	0	0	0	0	0	0	0	0	0	0	0	0	0
BC-0345309255	0	0	0	0	0	0	0	0	0	0	0	0	0	0	0	0	5.71111e-05	0	0	0	0	0	0	0	0
BC-0345309264	0	0	0	0	0	0	0	0	0	0	0	0	0	0	0	0	0	0	0	0	0	0	0	0	0
BC-0345309269	0	0	0	0	0	0	0	0	0	0	0	0	0	0	0	0	0	0	0	0	0	0	0	0	0
BC-0345309272	0	0	0	0	0	0	0	0	0	0	0	0	0	0	0	0	0	0	0	0	0	0	0	0	0
BC-0345309274	0	0	0	0	0	0	0	0	0	0	0	0	0	0	0	0	0	0	0	0	0	0	0	0	0
BC-0345309278	0	0	0	0	0	0	0	0	0	0	0	0	0	0	0	0	0	0	0	0	0	0	0	0	0
BC-0345309285	0	0	0	0	0	0	0	0	0	0	0	0	0	0	0	0	0	0	0	0	0	0	0	0	0
BC-0345309286	0	0	0	0	0	0	0	0	0	0	0	0	0	0	0	0	0	0	0	0	0	0	0	0	0
BC-0345311509	0	0	0	0	0	0	0	0	0	0	0	0	0	0	0	0	0	0	0	0	0	0.000143021	0	0	0
BC-0345312290	0	0	0	0	0	0	0	0	0	0	0	0	0	0	0	0	0	0	0	0	0	0	0	0	0
BC-0345312309	0	0	0	0	0	0	0	0	0	0	0	0	0	0	0	0	0	0	0	0.000315897	0	0	0	0	0
BC-0345312359	0	0	0	0	0	0	0	0	0	0	0	0	0	0	0	0	0	0	0	0	0	0	0	0	0
BC-0345312844	0	0	0	9.69035e-05	0	0	0	0	0	0	0	0	0	0	0	0	0	0	0	0.000158569	0	0	0	0	0
BC-0345312856	0	0	0	0	0	0	0	0	0	0	0	0	0	0	0	0	0	0	0	0	0	0	0	0	0
BC-0345312858	0	0	0	0	0	0	0	0	0	0	0	0	0	0	0	0	0	0	0	0	0	0	0	0	0
BC-0345312861	0	0	0	0	0	0	0	0	0	0	0	0	0	0	0	0	0	0	0	0	0	0	0	0	0
BC-0345312862	0	0	0	0	0	0	0	0	0	0	0	0	0	0	0	0	0	0	0	0	0	0	0	0	0
BC-0345312863	0	0	0	0	0	0	0	0	0	0	0	0	0	0	0	0	0	0	0	0	0	0	0	0	0
BC-0345312866	0	0	0	0	0	0	0	0	0	2.37552e-05	0	0	0	0	0	0	0	0	0	0	0	0	3.4553e-05	0	0
BC-0345312867	0	0	0	0	0	0	0	0	0	0	0	0	0	0	0	0	0	0	0	0	0	0	0	0	0
BC-0345312868	0	0	0	0	0	0	0	0	0	0	0	0	0	0	0	0	0	0	0	0	0	0	0	0	0
BC-0345312870	0	0	0	0	0	0	0	0	0	0	0	0	0	0	0	0	0	0	0	0	0	0	0	0	0
BC-0345312871	0	0	0	0	0	0	0	0	0	0	0	0	0	0	0	0	0	0	0	0	0	0	0	0	0
BC-0345312873	0	0	0	0	0	0	0	0	0	0.000113719	0	0	0	0	0	0	0	0	0	0	0	0	0	0	0
BC-0345312881	0	0	0	0	0	0	0	0	0	0	0	0	0	0	0	0	0	0	0	0	0	0	0	0	0
BC-0345312891	0	0	0	0	0	0	0	0	0	0	0	0	0	0	0	0	0	0	0	0	0	0	7.53604e-05	0	0
BC-0345312899	0	0	0	0	0	0	0	0	0	0	0	0	0	0	0	0	0	0	0	0	0	0	0	0	0
BC-0345312901	0	0	0	0	0	0	0	0	0	0.000204003	0	0	0	0	0	0	0	0	0	0	0	0	0	0	0
BC-0345312913	0	0	0	0	0	0	0	0	0	0	0	0	0	0	0	0	0	0	0	0	0	0	0	0	0
BC-0345312915	0	0	0	0	0	0	0	0	0	0	0	0	0	0	0	0	0	0	0	0	0	0	0	0	0
BC-0345312916	0	0	0	0	0	0	0	0	0	0	0	0	0	0	0	0	0	0	0	0	0	0	0	0	0
BC-0345312919	0	0	0	0	0	0	0	0	0	0	0	0	0	0	0	0	0	0	0	0	0	0	0	0	0
BC-0345312923	0	0	0	0	0	0	0	0	0	0	0	0	0	0	0	0	0	0	0	0	0	0	0	0	0
BC-0345312926	0	0	0	0	0	0	0	0	0	0	0	0	0	0	0	0	0	0	0	0	0	0	0	0	0
BC-0345312929	0	0	0	0	0	0	0	0	0	0	0	0	0	0	0	0	0	0	0	0.166206	0	0	0	0	0
BC-0345312934	0	0	0	0	0	0	0	0	0	9.30146e-05	0	0	0	0	0	0	0	0	0	0	0	0	0	0	0
BC-0345312936	0	0	0	0	0	0	0	0	0	0	0	0	0	0	0	0	0	0	0	0	0	0	0	0	0
BC-0345316120	0	0	0	0	0	0	0	0	0	0	0	0	0	0	0	0	0	0	0	0	0	0	0	0	0
BC-0345317873	0	0	0	0	0	0	0	0	0	0	0	0	0	0	0	0	0	0	0	0	0	0	0	0	0
BC-0345317899	0	0	0	0	0	0	0	0	0	0	0	0	0	0	0	0	0	0	0	0	0	0	0	0	0
BC-0345317903	0	0	0	0	0	0	0	0	0	0	0	0	0	0	0	0	0	0	0	0	0	0	0	0	0
BC-0345317930	0	0	0	0	0	0	0	0	0	0	0	0	0	0	0	0	0	0	0	0	0	0	0	0	0
BC-0345317940	0	0	0	0	0	0	0	0	0	0	0	0	0	0	0	0	0	0	0	0	0	0	0	0	0
BC-0345317954	0	0	0	0	0	0	0	0	0	0	0	0	0	0	0	0	0	0	0	0	0	0	0	0	0
BC-0345317962	0	0	0	0	0	0	0	0	0	0	0	0	0	0	0	0	0	0	0	0	0	0	0	0	0
BC-0345317968	0	0	0	0	0	0	0	0	0	0	0	0	0	0	0	0	0	0	0	0	0	0	0	0	0
BC-0345317985	0	0	0	0	0	0	0	0	0	0	0	0	0	0	0	0	0	0	0	0	0	0	0	0	0
BC-0345317990	0	0	0	0	0	0	0	0	0	0	0	0	0	0	0	0	0	0	0	0	0	0	0	0	0
BC-0345318017	0	0	0	0	0	0	0	0	0	0	0	0	0	0	0	0	0	0	0	0	0	0	0	0	0.000248529
BC-0345318022	0	0	0	0	0	0	0	0	0	0	0	0	0	0	0	0	0	0	0	0	0	0	0	0	0
BC-0345318028	0	0	0.000998643	0	0	0	0	0	0	0	0	0	0	0	0	0	0	0	0	0.000508743	0	0	0	0	0.00109285
BC-0345318041	0	0	0	0	0	0	0	0	0	0	0	0	0	0	0	0	0	0	0	0	0	0	0	0	0
BC-0345318049	0	0	0	0	0	0	0	0	0	0	0	0	0	0	0	0	0	0	0	0.000136687	0	0	0	0	0
BC-0345318055	0	0	0	0	0	0	0	0	0	0	0	0	0	0	0	0	0	0	0	0	0	0	0	0	0
BC-0345318072	0	0	0	0	0	0	0	0	0	0	0	0	0	0	0	0	0	0	0	0	0	0	0	0	0
BC-0345318090	0	0	0	0	0	0	0	0	0	0	0	0	0	0	0	0	0	0	0	0	0	0	0	0	0
BC-0345318091	0	0	0	0	0	0	0	0	0	0	0	0	0	0	0	0	0	0	0	0	0	0	0	0	0
BC-0345318096	0	0	0	0	0	0	0	0	0	0	0	0	0	0	0	0	0	0	0	0	0	0	0	0	0
BC-0345318103	0	0	0	0	0	0	0	0	0	0	0	0	0	0	0	0.000335058	0	0	0	0.000434335	0	0	0	0	0
BC-0345318110	0	0	0	0	0	0	0	0	0	0	0	0	0	0	0	0	0	0	0	0	0	0	0	0	0
BC-0345318266	0	0	0	0	0	0	0	0	0	0	0	0	0	0	0	0	0	0	0	0	0	0	0	0	0
BC-0345318279	0	0	0	0	0	0	0	0	0	0	0	0	0	0	0	0	0	0	0	0	0	0	0	0	0
BC-0345318285	0	0	0	0	0	0	0	0	0	0	0	0	0	0	0	0	0	0	0	0	0	0	0	0	0
BC-0345318289	0	0	0	0	0	0	0	0	0	0	0	0	0	0	0	0	0	0	0	0	0	0	0	0	0
BC-0345318293	0	0	0	0	0	0	0	0	0	0	0	0	0	0	0	0	0	0	0	0.00091878	0	0	0	0	0
BC-0345318324	0	0	0	0	0	0	0	0	0	0	0	0	0	0	0	0	0	0	0	0	0	0	0	0	0
BC-0345318354	0	0	0	0	0	0	0	0	0	0	0	0	0	0	0	0	0	0	0	0	0	0	0	0	0
BC-0345318355	0	0	0	0	0	0	0	0	0	0	0	0	0	0	0	0	0	0	0	0	0	0	0	0	0
BC-0345318362	0	0	0	0	0	0	0	0	0	0	0	0	0	0	0	0	0	0	0	0	0	0	0	0	0
BC-0345318425	0	0	0	0	0	0	0	0	0	0	0	0	0	0	0	0	0	0	0	0	0	0	0	0	0
BC-0345318435	0	0	0	0	0	0	0	0	0	0	0	0	0	0	0	0	0	0	0	0.000205182	0	0	0	0	0
BC-0345318445	0	0	0	0	0	0	0	0	0	0	0	0	0	0	0	0	0	0	0	0.000106382	0	0	0	0	0
BC-0345318450	0	0	0	0	0	0	0	0	0	0	0	0	0	0	0	0	0	0	0	0	0	0	0	0	0
BC-0345318467	0	0	0	0	0	0	0	0	0	0	0	0	0	0	0	0	0	0	0	0	0	0	0	0	0
BC-0345318498	0	0	0	0	0	0	0	0	0	0	0	0	0	0	0	0	0	0	0	0	0	0	0	0	0
BC-0345318501	0	0	0	0	0	0	0	0	0	0	0	0	0	0	0	0	0	0	0	0	0	0	0	0	0
BC-0345318502	0	0	0	0	0	0	0	0	0	0	0	0	0	0	0	0	0	0	0	0	0	0	0	0	0
BC-0345318704	0	0	0	0	0	0	0	0	0	0	0	0	0	0	0	0	0	0	0	0	0	0	0	0	0
BC-0345318725	0	0	0	0	0	0	0	0	0	0	0	0	0	0	0	0	0	0	0	0	0	0	0	0	0
BC-0345318730	0	0	0	0	0	0	0	0	0	0	0	0	0	0	0	0	0	0	0	0.000273607	0	0	0	0	0
BC-0345318737	0	0	0	0	0	0	0	0	0	0	0	0	0	0	0	0	0	0	0	0	0	0	0	0	0
BC-0345318742	0	0	0	0	0	0	0	0	0	0	0	0	0	0	0	0	0	0	0	0	0	0	0	0	0
BC-0345318759	0	0	0	0	0	0	0	0	0	0	0	0	0	0	0	0	0	0	0	0	0	0	0	0	0
BC-0345318769	0	0	0	0	0	0	0	0	0	0	0	0	0	0	0	0	0	0	0	0	0	0	0	0	0
BC-0345318772	0	0	0	0	0	0	0	0	0	0	0	0	0	0	0	0	0	0	0	0	0	0	0	0	0
BC-0345318773	0	0	0	0	0	0	0	0	0	0	0	0	0	0	0	0	0	0	0	0	0	0	0	0	0
BC-0345318776	0	0	0	0	0	0	0	0	0	0	0	0	0.000349182	0	0	0	0	0	0	0	0	0	0	0	0
BC-0345318779	0	0	0	0	0	0	0	0	0	0	0	0	0	0	0	0	0	0	0	0	0	0	0	0	0
BC-0345318784	0	0	0	0	0	0	0	0	0	0	0	0	0	0	0	0	0	0	0	0	0	0	0	0	0
BC-0345318788	0	0	0	0	0	0	0	0	0	0	0	0	0	0	0	0	0	0	0	0	0	0	0	0	0
BC-0345318789	0	0	0	0	0	0	0	0	0	0	0	0	0	0	0	0	0	0	0	6.29986e-05	0	0	0	0	0
BC-0345318790	0	0	0	0	0	0	0	0	0	0	0	0	0	0	0	0	0	0	0	0	0	0	0	0	0
BC-0345320543	0	0	0	0	0	0	0	0	0	0	0	0	0	0	0	0	0	0	0	0	0	0	0	0	0
BC-0345320552	0	0	0	0	0	0	0	0	0	0	0	0	0	0	0	0	0	0	0	0	0	0	0	0	0
BC-0345320606	0	0	0	0	0	0	0	0	0	0	0	0	0	0	0	0	0	0	0	0	0	0	0	0	0
BC-0345320612	0	0	0	0	0	0	0	0	0	0	0	0	0	0	0	0	0	0	0	0	0	0	0	0	0
BC-0345320613	0	0	0	0	0	0	0	0	0	0	0	0	9.90016e-05	0	0	0	0	0	0	0.000213234	0	0	0	0	0
BC-0345320614	0	0	0	0	0	0	0	0	0	0	0	0	0	0	0	0	0	0	0	0	0	0	0	0	0
BC-0345320616	0	0	0	0	0	0	0	0	0	0	0	0	0	0	0	0	0	0	0	0	0	0	0	0	0
BC-0345320623	0	0	0	0	0	0	0	0	0	0	0	0	0	0	0	0	0	0	0	0	0	0	0	0	0
BC-0345320648	0	0	0	0	0	0	0	0	0	0	0	0	0	0	0	0	0	0	0	0	0	0	0	0	0
BC-0345320656	0	0	0	0	0	0	0	0	0	5.2793e-05	0	0	0	0	0	0	0	0	0	0	0	0	0	0	0
BC-0345320665	0	0	0	0	0	0	0	0	0	0	0	0	0	0	0	0	0	0	0	0	0	0	0	0	0
BC-0345320670	0	0	0	0	0	0	0	0	0	0	0	0	0	0	0	0	0	0	0	0	0	0	0	0	0
BC-0345320671	0	0	0	0	0	0	0	0	0	0	0	0	0	0	0	0	0	0	0	0	0	0	0	0	0
BC-0345320807	0	0	0	0	0	0	0	0	0	0	0	0	0	0	0	0	0	0	0	0	0	0	0	0	0
BC-0345320811	0	0	0	0	0	0	0	0	0	0.000148489	0	0	0	0	0	0	0	0	0	0	0	0	0	0	0
BC-0345320813	0	0	0	0	0	0	0	0	0	0	0	0	0.000932482	0	0	0	0	0	0	0	0	0	0	0	0
BC-0345321107	0	0	0	0	0	0	0	0	0	0	0	0	0	0	0	0	0	0	0	0.00012761	0	0	0	0	0
BC-0345321115	0	0	0	0	0	0	0	0	0	0	0	0	0	0	0	0	0	0	0	0.0156664	0	0	0	0	0
BC-0345321116	0.000224377	0	0	0	0	0	0	0	0	0	0	0	0	0	0	0	0	0	0	0.736009	0	0	0	0	0.000105589
BC-0345321123	0	0	4.9581e-05	0	0	0	0	0	0	0	0	0	0	0	0	0	0	0	0	0	0	0	0	0	0
BC-0345321130	0	0	0	0	0	0	0	0	0	0	0	0	0	0	0	0	0	0	0	0.0281335	0	0	0	0	0
BC-0345321145	0	0	0	0	0	0	0	0	0	0	0	0	0	0	0	0	0	0	0	0	0	0	0	0	0
BC-0345321146	0	0	0	0	0	0	0	0	0	0	0	0	0	0	0	0	0	0	0	0.0511293	0	0	0	0	0
BC-0345321147	0	0	0	0	0	0	0	0	0	0	0	0	0	0	0	0	0	0	0	0	0	0	0	0	0
BC-0345321161	0	0	0	0	0	0	0	0	0	0	0	0	0	0	0	0	0	0	0	0.000894172	0	0	0	0	0
BC-0345321168	0	0	0	0	0	0	0	0	0	0	0	0	0	0	0	0	0	0	0	0	0	0	0	0	0
BC-0345321175	0	0	0	0	0	0	0	0	0	0	0	0	0	0	0	0	0	0	0	0	0	0	6.66085e-05	0	0
BC-0345321179	0	0	0	0	0	0	0	0	0	0	0	0	0	0	0	0	0	0	0	0.00773915	0	0	0	0	0
BC-0345321383	0	0	0	0	0	0	0	0	0	0	0	0	0	0	0	0	0	0	0	0.177209	0	0	0	0	0
BC-0345321396	0	0	0	0	0	0	0	0	0	0	0	0	0	0	0	0	0	0	0	0.000163642	0	0	0	0	0
BC-0345321871	0	0	0	0	0	0	0	0	0	0	0	0	0	0	0	0	0	0	0	0.0115268	0	0	0	0	0
BC-0345321877	0	0	0	0	0	0	0	0	0	0	0	0	0	0	0	0	0	0	0	0	0	0	0	0	0
BC-0345321897	0	0	0	0	0	0	0	0	0	0	0	0	0	0	0	0	0	0	0	0.278184	0	0	0	0	0
BC-0345321909	0	0	0	0	0	0	0	0	0	0	0	0	0	0	0	0	0	0	0	0.000305348	0	0	0	0	0
BC-0345321914	0	0	0	0	0	0	0	0	0	0	0	0	0	0	0	0	0	0	0	0.00565261	0	0	0	0	0
BC-0345321917	0.000114532	0	0	0	0	0	0	0	0	0	0	0	0	0	0	0	0	0	0	0.243693	0	0	0	0	0
BC-0345321927	0	0	0	0	0	0	0	0	0	0	0	0	0	0	0	0	0	0	0	0.0108992	0	0	0	0	0
BC-0345321935	0	0	0	0	0	0	0	0	0	0	0	0	0	0	0	0	0	0	0	0.000820981	0	0	0	0	0
BC-0345321975	0	0	0	0	0	0	0	0	0	0.000639623	0	0	0	0	0	0	0	0	0	0	0	0	0	0	0
BC-0345322011	0	0	0	0	0	0	0	0	0	0	0	0	0	0	0	0	0	0	0	0	0	0	0	0	0
BC-0345322057	0	0	0	0	0	0	0	0	0	0	0	0	0	0	0	0	0	0	0	0	0	0	0	0	0
BC-0345322084	0	0	0	0	0	0	0	0	0	0	0	0	0	0	0	0	0	0	0	0	0	0	0	0	0
BC-0345322110	0	0	0	0	0	0	0	0	0	0	0	0	0	0	0	0	0	0	0	0	0	0	0	0	0
BC-0345322158	0	0	0	0	0	0	0	0	0	0	0	0	0	0	0	0	0	0	0	0.00307603	0	0	0	0	0
BC-0345322163	0	0	0	0	0	0	0	0	0	0	0	0	0	0	0	0	0	0	0	0.0468113	0	0	0	0	0
BC-0345322170	0	0	0	0	0	0	0	0	0	0	0	0	0	0	0	0	0	0	0	0.000958116	0	0	0	0	0
BC-0345322176	0	0	0	0	0	0	0	0	0	0	0	0	0	0	0	0	0	0	0	0	0	0	0	0	0
BC-0345322178	0	0	0	0	0	0	0	0	0	0	0	0	0	0	0	0	0	0	0	0.0029258	0	0	0	0	0
BC-0345322183	0	0	0	0	0	0	0	0	0	0	0	0	0	0	0	0	0	0	0	0.0206369	0	0	0	0	0
BC-0345322184	0	0	0	0	0	0	0	0	0	0	0	0	0	0	0	0	0	0	0	0	0	0	0	0	0
BC-0345322185	0	0	0	0	0	0	0	0	0	0	0	0	0	0	0	0	0	0	0	0.0368303	0	0	0	0	6.52168e-05
BC-0345322190	0	0	0	0	0	0	0	0	0	9.18077e-05	0	0	0	0	0	0	0	0	0	0.00579409	0	0	0	0	0
BC-0345322192	1.70115e-05	0	0	0	0	0	0	0	0	0	0	0	0	0	0	0	0	0	0	0.0164698	0	0	0	0	0
BC-0345322196	0	0	0	0	0	0	0	0	0	0	0	0	0	0	0	0	0	0	0	0.194483	0	0	0	0	0
BC-0345322199	0	0	0	0	0	0	0	0	0	0	0	0	0	0	0	0	0	0	0	0	0	0	0	0	0
BC-0345322200	0	0	0	0	0	0	0	0	0	0	0	0	0	0	0	0	0	0	0	0.00375511	0	0	0	0	0
BC-0345322219	0	0	0	0	0	0	0	0	0	0	0	0	0	0	0	0	0	0	0	0.0112769	0	0	0	0	0
BC-0345322220	7.53667e-05	0	0	0	0	0	0	0	0	0	0	0	0	0	0	0	0	0	0	0.0385588	0	0	0	0	0
BC-0345322222	0	0	0	0	0	0	0	0	0	0	0	0	0	0	0	0	0	0	0	0.00346538	0	0	0	0	0
BC-0345322224	0	0	0	0	0	0	0	0	0	0	0	0	0	0	0	0	0	0	0	0.000709711	0	0	0	0	0
BC-0345322226	0	0	0	0	0	0	0	0	0	0	0	0	0	0	0	0	0	0	0	0.039606	0	0	0	0	0
BC-0345322437	0	0	0	0	0	0	0	0	0	0	0	0	0.000132828	0	0	0	0	0	0	0	0	0	0	0	0.000149026
BC-0345322452	0	0	0	0	0	0	0	0	0	0	0	0	0	0	0	0	0	0	0	0	0	0	0	0	0
BC-0345325526	0	0	0	0	0	0	0	0	0	0	0	0	0	0	0	0	0	0	0	0	0	0	0	0	0
BC-0345325529	4.7763e-05	0	0	0	0	0	0	0	0	0	0	0	0	0	0	0	0	0	0	0	0	0	0	0	0
BC-0345325566	0	0	0	0	0	0	0	0	0	0	0	0	0	0	0	0	0	0	0	0	0	0	0	0	0
BC-0345328326	0	0	0	0	0	0	0	0	0	0.000268719	0	0	0	0	0	0	0	0	0	0.0570118	0	0	0	0	0
BC-0345328367	0	0	0	0	0	0	0	0	0	0	0	0	0	0	0	0	0	0	0	0.075466	0	0	0	0	0
BC-0345597488	0	0	0	0	0	0	0	0	0	0	0	0	0	0	0	0	0	0	0	0	0	0	0	0	0
BC-0345597661	0	0	0	0	0	0	0	0	0	0	0	0	0	0	0	0	0	0	0	0	0	0	0	0	0
BC-0345597676	0	0	0	0	0	0	0	0	0	0	0	0	0	0	0	0	0	0	0	0	0	0	0	0	0
BC-0345601580	0.000614326	0	0	0	0	0	0	0	0.000992999	0	0	0	0	0	0	0	0	0	0	0.884011	0	0	0	0	0
BC-0345602211	0	0	0	0	0	0	0	0	0	0	0	0	0.00123197	0	0	0	0	0	0	0	0	0	0	0	0
BC-0345602252	0	0	0	0	0	0	0	0	0	0	0	0	0	0	0	0	0	0	0	0	0	0	0	0	0
BC-0345603447	0	0	0	0	0	0	0	0	0	0	0	0	0	0	0	0	0	0	0	0	0	0	0	0	0
BC-0345603463	0	0	0	0	0	0	0	0	0	0	0	0	0	0	0	0	0	0	0	0	0	0	0	0	0
BC-0345603479	0	0	0	0	0	0	0	0	0	0	0	0	0	0	0	0	0	0	0	0	0	0	0	0	0
BC-0345603490	0	0	0	0	0	0	0	0	0	0	0	0	0	0	0	0	0	0	0	0.00189957	0	0	0	0	0
BC-0345603493	0	0	0	0	0	0	0	0	0	0	0	0	0	0	0	0	0	0	0	0	0	0	0	0	0
BC-0345603498	0	0	0	0	0	0	0	0	0	0	0	0	0	0	0	0	0	0	0	0	0	0	0	0	0
BC-0345603510	0	0	0	0	0	0	0	0	0	0	0	0	0	0	0	0	0	0	0	0	0	0	0	0	0
BC-0345603546	0	0	0	0	0	0	0	0	0	0	0	0	0	0	0	0	0	0	0	0	0	0	0	0	0
BC-0345603571	0	0	0	0	0	0	0	0	0	0	0	0	0	0	0	0	0	0	0	0	0	0	0	0	0
BC-0345603576	0	0	0	0	0	0	0	0	0	0	0	0	0	0	0	0	0	0	0	0	0	0	0	0	0
BC-0345603596	0	0	0	0	0	0	0	0	0	0	0	0	0	0	0	0	0	0	0	0	0	0	0	0	0
BC-0345604096	0	0	0	0	0	0	0	0	0	0	0	0	0	0	0	0	0	0	0	0	0	0	0	0	0
BC-0345604110	0	0	0	0	0	0	0	0	0	0	0	0	0	0	0	0	0	0	0	0	0	0	0	0	0
BC-0345604117	0	0	0	0	0	0	0	0	0	0	0	0	0	0	0	0	0	0	0	0	0	0	0	0	0
BC-0345604118	0	0	0	0	0	0	0	0	0	0	0	0	0	0	0	0	0	0	0	0	0	0	0	0	0
BC-0345604141	0	0	0	0	0	0	0	0	0	0	0	0	0	0	0	0	0	0	0	0	0	0	0	0	0
BC-0345604148	0	0	0	0	0	0	0	0	0	0	0	0	0	0	0	0	0	0	0	0	0	0	6.61491e-05	0	0
BC-0345604163	0	0	0	0.000999563	0	0	0	0	0	0	0	0	0	0	0	0	0	0	0	0.000437309	0	0	0	0	0
BC-0345606405	0	0	0	0	0	0	0	0	0	0	0	3.26955e-05	0	0	0	0	0	0	0	6.26664e-05	0	0	0	0	0
BC-0345606420	0	0	0	0	0	0	0	0	0	0	0	0	0	0	0	0	0	0	0	0	0	0	0	0	0
BC-0345607294	0	0	0	0	0	0	0	0	0	0	0	0	0	0	0	0	0	0	0	0.105316	0	0	0	0	0
BC-0345649017	0	0	0	0	0	0	0	0	0	0	0	0	0	0	0	0	0	0	0	0.0707455	0	0	0	0	0
BC-0345649055	0	0	0	0	0	0	0	0	0	0	0	0	0	0	0	0	0	0	0	0.133712	0	0	0	0	0
BC-0345649092	0	0	0	0	0	0	0	0	0	0	0	0	0	0	0	0	0	0	0	0	0	0	0	0	0
BC-0345649095	0	0	0	0	0	0	0	0	0	0	0	0	0	0	0	0	0	0	0	0.219109	0	0	0	0	0
BC-0345649106	8.58152e-05	0	0	0	0	0	0	0	0	0	0	0	0	0	0	0	0	0	0	0.287616	0	0	0	0	0
BC-0345649107	0	0	0	0	0	0	0	0	0	0	0	0	0	0	0	0	0	0	0	0.17449	0	0	0	0	0
BC-0345649213	0	0	0	0	0	0	0	0	0	0	0	0	0	0	0	0	0	0	0.000427078	0.000628057	0	0	0	0	0
BC-0345649216	0	0	0	0	0	0	0	0	0	0	0	0	0	0	0	0	0	0	0	0.000152604	0	0	0	0	0
BC-0345649268	0	0	0	0	0	0	0	0	0	0	0	0	0	0	0	0	0	0	0	0.11979	0	0	0	0	0
BC-0345649277	0	0	0	0	0	0	0	0	0	0	0	0	0.000155416	0	0	0	0	0	0	0	0	0	0	0	0
BC-0345649292	0	0	0	0	0	0	0	0	0	0	0	0	0	0	0	0	0	0	0	0.166478	0	0	0	0	0.000163298
BC-0345649295	0	0	0	0	0	0	0	0	0	0	0	0	0	0	0	0	0	0	0	0	0	0	0	0	0
BC-0345649297	0	0	0	0	0	0	0	0	0	0	0	0	0	0	0	0	0	0	0	0.00448447	0	0	0	0	0
BC-0345649324	0	0	0	0	0	0	0	0	0	0	0	0	0	0	0	0	0	0	0	0	0	0	0	0	0
BC-0345649338	0	0	0	0	0	0	0	0	0	0	0	0	0	0	0	0	0	0	0	0	0	0	0	0	0
BC-0345649339	0	0	0	0	0	0	0	0	0	0	0	0	0	0	0	0	0	0	0	0.000226693	0	0	0	0	0
BC-0345649341	0.000470075	0	0	0	0	0	0	0	0	1.16934e-05	0	0	0	0	0	0	0	0	0	0.904198	0	0	0	0	0
BC-0345649347	0	0	0	0	0	0	0	0	0	0	0	0	0	0	0	0	0	0	0	9.8024e-05	0	0	0	0	0
BC-0345649356	0	0	0	0	0	0	0	0	0	0	0	0	0	0	0	0	0	0	0	0	0	0	0	0	0
BC-0345649368	0	0	0	0	0	0	0	0	0	0	0	0	0	0	0	0	0	0	0	0.00358759	0	0	0	0	0
BC-0345649409	0	0	0	0	0	0	0	0	0	0	0	0	0	0	0	0	0.00647815	0	0	0.00384042	0	0	0	0	0
BC-0345649424	0.000530255	0	0	0	0	0	0	0	0	0	0	0.000219677	0	0	0	0	0	0	0	0.747712	0	0	0	0	0
BC-0345649444	0	0	0	0	0	0	0	0	0	0	0	0	0	0	0	0	0	0	0	5.16447e-05	0	0	0	0	0
BC-0345649477	0	0	0	0	0	0	0	0	0	0	0	0	0	0	0	0	0	0	0	0.000557828	0	0	0	0	0
BC-0345649514	0	0	0	0	0	0	0	0	0	0	0	0	0	0	0	0	0	0	0	0.0743544	0	0	0	0	0
BC-0345649520	0	0	0	0	0	0	0	0	0	0	0	0	0	0	0	0	0	0	0	0.315757	0	0	0	0	0
BC-0345649523	0.000441224	0	0	0	0	0	0	0	0	0	0	0	0	0	0	0	0	0	0	0.776036	0	0	0	0	0
BC-0345649530	0	0	0	0	0	0	0	0	0	0	0	0	0	0	0	0	0	0	0	0	0	0	0	0	0
BC-0345649544	0	0	0	0	0	0	0	0	0	0	0	0	0	0	0	0	0	0	0	0	0	0	0	0	0
BC-0345649550	0	0	0	0	0	0	0	0	0	6.2468e-05	0	0	0	0	0	0	0	0	0	0.0520171	0	0	0	0	0
BC-0345649555	0	0	0	0	0	0	0	0	0	0	0	0	0	0	0	0	0	0	0	0	0	0	0	0	0
BC-0345649581	0	0	0	0	0	0	0	0	0	0	0	0	0	0	0	0	0	0	0	0	0	0	0	0	6.8403e-05
BC-0345649588	0	0	0	0	0	0	0	0	0	0	0	0	0	0	0	0	0	0	0	4.94562e-05	0	0	0	0	0.00110864
BC-0345649603	0	0	0	0	0	0	0	0	0	0	0	0	0	0	0	0	0	0	0	0.824588	0	0	0	0	0
BC-0345649608	0	0	0	0	0	0	0	0	6.44523e-05	0	0	0	0	0	0	0	0	0	0	0	0	0	0	0	0
BC-0345649620	0	0	0	0	0	0	0	0	0	0	0	0	0	0	0	0	0	0	0	0	0	0	0	0	0
BC-0345649625	0.000380244	0	0	0	0	0	0	0	0	0	0	0	0	0	0	0	0	0	0	0.705696	0	0	0	0	0
BC-0345649629	0.000236076	0	0	0	0	0	0	0	0	0	0	0	0	0	0	0	0	0	0	0.713931	0	0	0	0	0
BC-0345649632	0	0	0	0	0	0	0	0	0	0	0	0	0	0	0	0	0	0	0	0.00120409	0	0	0	0	0.000244073
BC-0345649635	0	0	0	0	0	0	0	0	0	0	0	0	0	0	0	0	0	0	0	0.000715345	0	0	0	0	0
BC-0345649640	0.000371207	0	1.50704e-05	0	0	0	1.26908e-05	0	6.2661e-05	0	0	0	0	0	0	0	0	0	0	0.959562	0	0	0	0	0
BC-0345649642	0	0	0	0	0	0	0	0	0	0	0	0	0	0	0	0	0	0	0	0.677306	0	0	0	0	0
BC-0345649643	0	0	0	0	0	0	0	0	0	0	0	0	0	0	0	0	0	0	0	0	0	0	0	0	0
BC-0345649649	0.000369339	0	0	0	0	0	0	0	0	0	2.17258e-05	0	0	0	0	0	0	0	1.56909e-05	0.941211	0	0	0	0	0
BC-0345649650	0	0	0	0	0	0	0	0	0	0	0	0	0	0	0	0	0	0	0	0	0	0	0	0	0
BC-0345649658	0	0	0	0	0	0	0	0	0	0	0	0	0	0	0	0	0	0	0	0.801469	0	0	0	0	0
BC-0345649664	0.000400258	0	0	0	0	0	0	0	0	0	0	0	2.99259e-05	0	0	0	0	0	0	0.941772	0	0	0	0	0
BC-0345649665	0.000220866	0	0	0	0	0	0	0	0.000370889	0	0	0	0	0	0	0	0	0	0	0.823657	0	0	0	0	0
BC-0345649675	0	0	0	0	0	0	0	0	0	0	0	0	0	0	0	0	0	0	0	0	0	0	0	0	0
BC-0345649691	0	0	0	0	0	0	0	0	0.00206746	0	0	0	0	0	0	0	0	0	0	0	0	0	0	0	0
BC-0345649693	0.000856601	0	0	0	0	0	0	0	0	0	0	0	0	0	0	0	0	0	0	0.7075	0	0	0	0	0
BC-0345649717	0	0	0	0	0	0	0	0	0	0	0	0	0	0	0	0	0	0	0	0	0	0	0	0	0
BC-0345649718	0	0	0	0	0	0	0	0	0	0	0	0	0	0	0	0	0	0	0	0.867383	0	0	0	0	0
BC-0345649720	0	0	0	0	0	0	0	0	0	0	0	0	0	0	0	0	0	0	0	0	0	0	0	0	0
BC-0345649726	0	0	0	0	0	0	0	0	0	0	0	0	0	0	0	0	0	0	0	0	0	0	0	0	0
BC-0345649728	0	0	0	0	0	0	0	0	0.00113579	0	0	0	0	0	0	0	0	0	0	0	0	0	0	0	0
BC-0345649735	0	0	0	0	0	0	0	0	0	0	0	0	0	0	0	0	0	0	0	0.720323	0	0	0	0	0
BC-0345649756	0.00129451	0	0	0	0	0	0	0	0	0	0	0	0	0	0	0	0	0	0	0.697941	0	0	0	0	0
BC-0345649786	0	0	0	0	0	0	0	0	0	0	0	0	0	0	0	0	0	0	0	0.194223	0	0	0	0	0
BC-0345649806	0	0	0	0	0	0	0	0	0	0	0	0	0	0	0	0	0	0	0	0	0	0	0	0	0
BC-0345649824	0.00010354	0	0	0	0	0	0	0	0	0.00152548	0	0	0	0	0	0	0	0	0	0.0731197	0	0	0	0	0
BC-0345649836	0	0	0	0	0	0	0	0	0	0	0	0	0	0	0	0	0	0	0	0	0	0	0	0	0
BC-0345649851	0	0	0	0	0	0	0	0	0	0	0	0	0	0	0	0	0	0	0	0.0223266	0	0	0	0	0
BC-0345649882	0.000429489	0	0	0	0	0	0	0	0	0	0	0	0	0	0	0	0	0	0	0.279043	0	0	0	0	0
BC-0345649907	0	0	0	0	0	0	0	0	0	0	0	0	0	0	0	0	0	0	0	0.238393	0	0	0	0	0
BC-0345649930	0	0	0	0	0	0	0	0	0	0	0	0	0	0	0	0	0	0	0	0.231546	0	0	0	0	0
BC-0345649934	0	0	0	0	0	0	0	0	0	0	0	0	0	0	0	0	0	0	0	0.0718824	0	0	0	0	0
BC-0345650012	0	0	0	0	0	0	0	0	0	0	0	0	0	0	0	0	0	0	0	0.000475397	0	0	0	0	0
BC-0345650067	0	0	0	0	0	0	0	0	0	0	0	0	0	0	0	0	0	0	0	0	0	0	0	0	0.00402299
BC-0345650138	0	0	0	0	0	0	0	0	0	0	0	0	0	0	0	0	0	0	0	0	0	0	0	0	0
BC-0345650174	0	0	0	0	0	0	0	0	0	0	0	0	0	0	0	0	0	0	0	0	0	0	0	0	0
BC-0345650188	0	0	0	0	0	0	0	0	0	0	0	0	0	0	0	0	0	0	0	0	0	0	0	0	0
BC-0345650219	0.000864254	0	0	0	0	0	0	0	0	0	0	0	0.000214081	0	0	0	0	0	0	0.734251	0	0	0	0	0
BC-0345650272	0	0	0	0	0	0	0	0	0	0	0	0	0	0	0	0	0	0	0	0	0	0	0	0	0
BC-0345650275	0	0	0	0	0	0	0	0	0	0	0	0	0	0	0	0	0	0	0	0.0158265	0	0	0	0	0
BC-0345650283	0	0	0	0	0	0	0	0	0	0	0	0	0	0	0	0	0	0	0	0	0	0	0	0	0
BC-0345650299	0	0	0	0	0	0	0	0	0	0	0	0	0	0	0	0	0	0	0	0	0	0	0	0	0
BC-0345650302	0	0	0	0	0	0	0	0	0	0	0	0	0	0	0	0	0	0	0	0.216087	0	0	0	0	0
BC-0345650305	0	0	0	0	0	0	0	0	0	0	0	0	0	0	0	0	0	0	0	0	0	0	0	0	0
BC-0345650325	9.01536e-05	0	0	0	0	0	0	0	0.000139328	0	0	0	0	0	0	0	0	0	0	0.221852	0	0	0	0	0
BC-0345650330	0	0	0	0	0	0	0	0	0	0	0	0	0	0	0	0	0	0	0	0.0700243	0	0	0	0	0
BC-0345650336	0	0	0	0	0	0	0	0	0	0	0	0	0	0	0	0	0	0	0	0.0431346	0	0	0	0	0
BC-0345650341	0	0	0	0	0	0	0	0	0	0.000225488	0	0	0	0	0	0	0	0	0	0.0705476	0	0	0	0	0
BC-0345650345	0	0	0	0	0	0	0	0	0	0	0	0	0	0	0	0	0	0	0	0	0	0	0	0	0
BC-0345650346	0	0	0	0	0	0	0	0	0	0	0	0	0	0	0	0	0	0	0	0.0979683	0	0	0	0	0
BC-0345650350	0	0	0	0	0	0	0	0	0	0	0	0	0	0	0	0	0	0	0	0	0	0	0	0	0
BC-0345650352	0	0	0	0	0	0	0	0	0	0	0	0	0	0	0	0	0	0	0	0.0423898	0	0	0	0	0
BC-0345650553	0	0	0	0	0	0	0	0	0	0	0	0	0	0	0	0	0	0	0	0.0975958	0	0	0	0	0
BC-0345650560	0	0	0	0	0	0	0	0	0	0	0	0	0	0	0	0	0	0	0	0	0	0	0	0	0
BC-0345650562	0	0	0	0	0	0	0	0	0	0	0	0	0	0	0	0	0	0	0	0.0157813	0	0	0	0	0
BC-0345650576	0	0	0	0	0	0	0	0	0	0	0	0	0	0	0	0	0	0	0	0.132759	0	0	0	0	0
BC-0345650593	0	0	0	0	0	0	0	0	0	0	0	0	0	0	0	0	0	0	0	0.106507	0	0	0	0	0
BC-0345650602	0	0	0	0	0	0	0	0	0	0	0	0	0	0	0	0	0	0	0	0.0895577	0	0	0	0	0
BC-0345650623	0	0	0	0	0	0	0	0	0	0	0	0	0	0	0	0	0	0	0	0.0393584	0	0	0	0	0
BC-0345650629	0.000319931	0	0	0	0	0	0	0	0	0	0	0	0	0	0	0	0	0	0	0.177276	0	0	0	0	0
BC-0345650631	0	0	0	0	0	0	0	0	0	0	0	0	0	0	0	0	0	0	0	0.0477436	0	0	0	0	0
BC-0345650697	0	0	0	0	0	0	0	0	0	0	0	0	0	0	0	0	0	0	0	0	0	0	0	0	0
BC-0345650708	0.00087249	0	0	0	0	0	0	0	0	0	0	0	0	0	0	0	0	0	0	0.860695	0	0	0	0	0
BC-0345650726	0.000496737	0	0	0	0	0	0	0	0	0	0	0	0	0	0	0	0	0	0	0.676569	0	0	0	0	0
BC-0345650854	0	0	0	0	0	0	0	0	0	0	0	0	0	0	0	0	0	0	0	0	0	0	0	0	0
BC-0345650934	0.000299445	0	0	0	0	0	0	0	0	0	0	0	0	0	0	0	0	0	0	0.710962	0	0	0.00024621	0	0
BC-0345650957	0	0	0	0	0	0	0	0	0	0	0	0	0	0	0	0	0	0	0	0	0	0	0	0	0
BC-0345650987	0	0	0	0	0	0	0	0	0	0	0	0	0	0	0	0	0	0	0	0.881739	0	0	0	0	0
BC-0345651009	0	0	0	0	0	0	0	0	0	0	0	0	0	0	0	0	0	0	0	0.256221	0	0	0	0	0
BC-0345651039	0	0	0	0	0	0	0	0	0	0	0	0	0	0	0	0	0	0	0	0.103427	0	0	0	0	0
BC-0345651058	0.000173581	0	0	0	0	0	0	0	0	0	0	0	0.000173581	0	0	0	0	0	0	0.473659	0	0	0	0	0.00018226
BC-0345651059	0	0	0	0	0	0	0	0	0	0	0	0	0	0	0	0	0	0	0	0.0554111	0	0	0	0	0
BC-0345651066	0	0	0	0	0	0	0	0	0	0	0	0	0	0	0	0	0	0	0	9.56508e-05	0	0	0	0	0
BC-0345651079	0	0	0	0	0	0	0	0	0	0	0	0	0	0	0	0	0	0	0	0.0296118	0	0	0	0	0
BC-0345651141	0	0	0	0	0	0	0	0	0	0	0	0	0	0	0	0	0	0	0	0	0	0	0	0	0
BC-0345651155	0	0	0	0	0	0	0	0	0	0	0	0	0	0	0	0	0	0	0	0	0	0	0	0	0
BC-0345651165	0	0	0	0	0	0	0	0	0	0	0	0	0	0	0	0	0	0	0	0	0	0	0	0	0
BC-0345651186	0	0	0	0	0	0	0	0	0	0	0	0	0	0	0	0	0	0	0	0	0	0	0	0	0
BC-0345651269	0	0	0	0	0	0	0	0	0	0	0	0	0	0	0	0	0	0	0	0	0	0	0	0	0
BC-0345651345	0	0	0	0	0	0	0	0	0	0	0	0	0	0	0	0	0	0	0	0.000124893	0	0	0	0	0
BC-0345651372	0	0	0	0	0	0	0	0	0	0	0	0	0	0	0	0	0	0	0	0	0	0	0	0	0
BC-0345651403	0	0	0	0	0	0	0	0	0	0	0	0	0	0	0	0	0	0	0	0	0	0	0	0	0
BC-0345651526	0	0	0	0	0	0	0	0	0	0	0	0	0	0	0	0	0	0	0	0	0	0	0	0	0
BC-0345651531	0	0	0	0	0	0	0	0	0	0	0	0	0	0	0	0	0	0	0	0	0	0	0	0	0
BC-0345651537	0	0	0	0	0	0	0	0	0	0	0	0	0	0	0	0	0	0	0	0	0	0	0	0	0
BC-0345651539	0	0	0	0	0	0	0	0	0	0	0	0	0	0	0	0	0	0	0	0	0	0	0	0	0
BC-0345651570	0	0	0	0	0	0	0	0	0.0038289	0	0	0	0	0	0	0	0	0	0	0	0	0	0	0	0
BC-0345651576	0	0	0	0	0	0	0	0	0	0	0	0	0	0	0	0	0	0	0	0	0	0	0	0	0
BC-0345651588	0	0	0	0	0	0	0	0	0	0	0	0	0	0	0	0	0	0	0	0	0	0	0	0	0
BC-0345651597	0	0	0	0	0	0	0	0	0	0	0	0	0	0	0	0	0	0	0	0	0	0	0	0	0
BC-0345651720	0	0	0	0	0	0	0	0	0	0	0	0	0	0	0	0	0	0	0	0	0	0	0	0	0
BC-0345651818	0	0	0	0	0	0	0	0	0	0	0	0	0	0	0	0	0	0	0	0	0	0	0	0	0
BC-0345651825	0	0	0	0	0	0	0	0	0	0	0	0	0	0	0	0	0	0	0	0	0	0	0	0	0
BC-0345651850	0	0	0	0	0	0	0	0	0	0	0	0	0	0	0	0	0	0	0	0	0	0	0	0	0
BC-0345651856	0	0	0	0	0	0	0	0	0	0	0	0	0	0	0	0	0	0	0	0	0	0	0	0	0
BC-0345651869	0	0	0	0	0	0	0	0	0	0	0	0	0	0	0	0	0	0	0	0	0	0	0	0	0
BC-0345651876	0	0	0	0	0	0	0	0	0	0	0	0	0	0	0	0	0	0	0	0	0	0	0	0	0
BC-0345651950	0	0	0	0	0	0	0	0	0	0	0	0	0	0	0	0	0	0	0	0	0	0	0	0	0
BC-0345651964	0	0	0	0	0	0	0	0	0	0	0	0	0	0	0	0	0	0	0	0	0	0	0	0	0
BC-0345651987	0	0	0	0	0	0	0	0	0	0	0	0	0	0	0	0	0	0	0	0.000164062	0	0	0	0	0
BC-0345652068	0	0	0	0	0	0	0	0	0	0	0	0	0	0	0	0	0	0	0	0.862395	0	0	0	0	0
BC-0345652252	0	0	0	0	0	0	0	0	0	0	0	0	0	0	0	0	0	0	0	0	0	0	0	0	0
BC-0345652283	0	0	0	0	0	0	0	0	0	0	0	0	0	0	0	0	0	0	0	0.081957	0	0	0	0	0
BC-0345652484	0	0	0	0	0	0	0	0	0	0	0	0	0	0	0	0	0	0	0	0	0	0	0	0	0
BC-0345652487	0.000113276	0	0	0	0	0	0	0	0	0	0	0	0	0	0	0	0	0	0	0.0174184	0	0	0	0	0
BC-0345653386	0	0	0	0	0	0	0	0	0	0	0	0	0	0	0	0	0	0	0	0	0	0	0	0	0
BC-0345653412	0	0	0	0	0	0	0	0	0	0	0	0	0	0	0	0	0	0	0	0	0	0	0	0	0
BC-0345653724	8.84998e-05	0	0	0	0	0	0	0	0	0	0	0	0	0	0	0	0	0	0	0.409418	0	0	0	0	0
BC-0345653812	0	0	0	0	0	0	0	0	0	0	0	0	0	0	0	0	0	0	0	0.123593	0	0	0	0	0
BC-0345653831	0	0	0	0	0	0	0	0	0	0	0	0	0	0	0	0	0	0	0	8.12079e-05	0	0	0	0	0
BC-0345653865	0	0	0	0	0	0	0	0	0	0	0	0	0	0	0	0	0	0	0	0	0	0	0	0	0
BC-0345653908	0	0	0	0	0	0	0	0	0	0	0	0	0	0	0	0	0	0	0	0	0	0	0	0	0
BC-0345653925	0	0	0	0	0	0	0	0	0	0	0	0	0	0	0	0	0	0	0	0	0	0	0	0	0
BC-0345653936	0	0	0	0	0	0	0	0	0	0	0	0	0	0	0	0	0	0	0	0	0	0	0	0	0
BC-0345653944	0	0	0	0	0	0	0	0	0.001447	0	0	0	0	0	0	0	0	0	0	0	0	0	0	0	0
BC-0345653996	0	0	0	0	0	0	0	0	0	0	0	0	0	0	0	0	0	0	0	0	0	0	0	0	0
BC-0345653997	0	0	0	0	0	0	0	0	0	0	0	0	0	0	0	0	0	0	0	0	0	0	0	0	0
BC-0345654105	0	0	0	0	0	0	0	0	0	0	0	0	0	0	0	0	0	0	0	0	0	0	0	0	0
BC-0345654113	0	0	0	0	0	0	0	0	0	0	0	0	0	0	0	0	0.000119937	0	0	0	0	0	0	0	0
BC-0345654126	0	0	0	0	0	0	0	0	0	0	0	0	0	0	0	0	0	0	0	0	0	0	7.92934e-05	0	0
BC-0345654139	0	0	0	0	0	0	0	0	0	0	0	0	0	0	0	0	0	0	0	0	0	0	0	0	0
BC-0345654141	0	0	0	0	0	0	0	0	0	0	0	0	0	0	0	0	0	0	0	0	0	0	0	0	0
BC-0345654150	0	0	0	0	0	0	0	0	0	0	0	0	0	0	0	0	0	0	0	0	0	0	0	0	0
BC-0345654171	0	0	0	0	0	0	0	0	0	0	0	0	0	0	0	0	0	0	0	0	0	0	0	0	0
BC-0345654181	0	0	0	0	0	0	0	0	0	0	0	0	0	0	0	0	0	0	0	0	0	0	0	0	0
BC-0345654190	0	0	0	0	0	0	0	0	0.000402353	0	0	0	0	0	0	0	0	0	0	0	0	0	0	0	0.00029262
BC-0345654269	0	0	0	0	0	0	0	0	0	0	0	0	0	0	0	0	0	0	0	0	0	0	0	0	0
BC-0345654285	0	0	0	0	0	0	0	0	0	0	0	0	0.000150465	0	0	0	0	0	0	0	0	0	0	0	0
BC-0345654302	0	0	0	0	0	0	0	0	0	0	0	0	0	0	0	0	0	0	0	0	0	0	0	0	0
BC-0345654304	0	0	0	0	0	0	0	0	0	0	0	0	0	0	0	0	0	0	0	0	0	0	0	0	0.000282283
BC-0345654316	0	0	0	0	0	0	0	0	0	0	0	0	0	0	0	0	0	0	0	0	0	0	0	0	0
BC-0345654319	0	0	0	0	0	0	0	0	0	0	0	0	0	0	0	0	0	0	0	0	0	0	0	0	0
BC-0345654325	0	0	0	0	0	0	0	0	0	0	0	0	0	0	0	0	0	0	0	0	0	0	0	0	0
BC-0345654356	0	0	0	4.7536e-05	0	0	0	0	0	0	0	0	0	0	0	0	0	0	0	0	0	0	0	0	0
BC-0345654370	0	0	0	0	0	0	0	0	0	0	0	0	0	0	0	0	0	0	0	0	0	0	0	0	0
BC-0345654378	0	0	0	0	0	0	0	0	0	0	0	0	0.00569665	0	0	0	0	0	0	0	0	0	0	0	0
BC-0345679858	0	0	0	0	0	0	0	0	0	0	0	0	0	0	0	0	0	0	0	0	0	0	0	0	0
BC-0345685028	0	0	0	0	0	0	0	0	0	0	0	0	0	0	0	0	0	0	0	0	0	0	0	0	0
BC-0345685031	0	0	0	0	0	0	0	0	0	0	0	0	0	0	0	0	0	0	0	0	0	0	0	0	0
BC-0345685075	0	0	0	0	0	0	0	0	0	0	0	0	0	0	0	0	0	0	0	0	0	0	0	0	0
BC-0345685103	0	0	0	0	0	0	0	0	0	0	0	0	0	0	0	0	0	0	0	0	0	0	0	0	0
BC-0345685878	0	0	0	0	0	0	0	0	0	0	0	0	0	0	0	0	0	0	0	0	0	0	0	0	0
BC-0345686433	0	0	0	0	0	0	0	0	0	0	0	0	0	0	0	0	0	0	0	0	0	0	0	0	0
BC-0345689525	0	0	0	0	0	0	0	0	0	0	0	0	0	0	0	0	0	0	0	0	0	0	0	0	0
BC-0345690871	0	0	0	0	0	0	0	0	0	0	0	0	0	0	0	0	0	0	0	0	0	0	0	0	0
BC-0345690979	0	0	0	0	0	0	0	0	0	0	0	0	0	0	0	0	0	0	0	0	0	0	0	0	0
BC-0345690988	0	0	0	0	0	0	0	0	0	0	0	0	0	0	0	0	0	0	0	0	0	0	0	0	0
BC-0345693685	0	0	0	0	0	0	0	0	0	0	0	0	0	0	0	0	0	0	0	0	0	0	0	0	0
BC-0345694964	0	0	0	0	0	0	0	0	0	0	0	0	0	0	0	0	0	0	0	0	0	0	0	0	0
BC-0345696152	0	0	0	0	0	0	0	0	0	0	0	0	0	0	0	0	0	0	0	0	0	0	0	0	0
BC-0345696172	0	0	0	0	0	0	0	0	0	0	0	0	0	0	0	0	0	0	0	0.977881	0	0	0	0	0
BC-0345696173	0	0	0	0	0	0	0	0	0	0	0	0	0	0	0	0	0	0	0	0	0	0	0	0	0
BC-0345698091	0	0	0	0	0	0	0	0	0	0	0	0	0	0	0	0	0	0	0	0	0	0	0	0	0
BC-0345698107	0	0	0	0	0	0	0	0	0	0	0	0	0	0	0	0	0	0	0	0	0	0	0	0	0
BC-0345698157	0	0	0	0	0	0	0	0	0	0	0	0	0	0	0	0	0	0	0	0	0	0	0	0	0
BC-0345698160	0	0	0	0	0	0	0	0	0	0	0	0	0	0	0	0	0	0	0	0	0	0	0	0	0
BC-0345698162	0	0	0	0	0	0	0	0	0	0	0	0	0	0	0	0	0	0	0	0	0	0	0	0	0
BC-0345699321	0	0	0	0	0	0	0	0	0	0	0	0.000107928	0	0	0	0	0	0	0	0	0	0	0	0	0
BC-0345700560	0	0	0	0	0	0	0	0	0	0	0	0	0	0	0	0	0	0	0	0	0	0	0	0	0
BC-0345702199	0	0	0	0	0	0	0	0	0	0	0	0	0	0	0	0	0	0	0	0	0	0	0	0	0
BC-0345702204	0	0	0	0	0	0	0	0	0	0	0	0	0	0	0	0	0	0	0	0	0	0	0	0	0
BC-0345702211	0	0	0	0	0	0	0	0	0	0	0	0	0	0	0	0	0	0	0	0	0	0	0	0	0
BC-0345712655	0	0	0	0	0	0	0	0	0	0	0	0	0	0	0	0	0	0	0	0	0	0	0	0	0
BC-0345719382	0	0	0	0	0	0	0	0	0	0	0	0	0	0	0	0	0	0	0	0	0	0	0	0	0
BC-0345719421	0	0	0	0	0	0	0	0	0	4.36491e-05	0	0	0	0	0	0	0	0	0	0	0	0	0	0	0
BC-0345722559	0	0	0	0	0	0	0	0	0	0	0	0	0	0	0	0	0	0	0	0	0	0	0	0	0
BC-0345723321	0	0	0	0	0	0	0	0	0	4.30538e-05	0	0	0	0	0	0	0	0	0	0	0	0	0	0	9.68711e-05
BC-0345723322	0	0	0	6.5937e-05	0	0	0	0	0	0	0	0	0	0	0	0	0	0	0	0	0	0	0	0	0
BC-0345723609	0	0	0	0	0	0	0	0	0	0	0	0	0	0	0	0	0	0	0	0	0	0	0	0	0
BC-0345723616	0	0	0	0	0	0	0	0	0	0	0	0	0	0	0	0	0	0	0	0	0	0	0	0	0
BC-0345723627	0	0	0	0	0	0	0	0	0	0.0004977	0	0	0	0	0	0	0	0	0	0	0	0	0	0	0
BC-0345723629	0	0	0	0	0	0	0	0	0	0	0	0	0	0	0	0	0	0	0	0	0	0	0	0	0
BC-0345723630	0	0	0	0	0	0	0	0	0	0	0	0	0	0	0	0	0	0	0	0	0	0	0	0	0
BC-0345723632	0	0	0	0	0	0	0	0	0	0	0	0	0	0	0	0	0	0	0	0	0	0	0	0	0
BC-0345723644	0	0	0	0	0	0	0	0	0	0	0	0	0	0	0	0	0	0	0	0	0	0	0	0	0
BC-0345723647	0	0	0	0	0	0	0	0	0	0	0	0	0	0	0	0	0	0	0	0	0	0	0	0	0
BC-0345723648	0	0	0	0	0	0	0	0	0	0	0	0	0	0	0	0	0	0	0	0	0	0	0	0	0
BC-0345723651	0	0	0	0	0	0	0	0	0	0	0	0	0	0	0	0	0	0	0	0.000166142	0	0	0	0	0
BC-0345723654	0	0	0	0	0	0	0	0	0	0	0	0	0	0	0	0	0	0	0	0	0	0	0	0	0
BC-0345723655	0	0	0	0	0	0	0	0	0	0	0	0	0	0	0	0	0	0	0	0	0	0	0	0	0
BC-0345723658	0	0	0	0	0	0	0	0	0	0	0	0	0	0	0	0	0	0	0	0	0	0	0	0	0
BC-0345723659	0	0	0	0	0	0	0	0	0	0	0	0	0	0	0	0	0	0	0	0	0	0	0	0	0
BC-0345723660	0	0	0	0	0	0	0	0	0	0	0	0	0	0	0	0	0	0	0	0	0	0	0	0	0
BC-0345723661	0	0	0	0	0	0	0	0	0	0	0	0	0	0	0	0	0	0	0	0	0	0	0	0	0
BC-0345723662	0.00014453	0	0	0	0	0	0	0	0	0	0	0	0	0	0	0	0	0	0	0.251978	0	0	0	0	0
BC-0345723665	0	0	0	0	0	0	0	0	0	0	0	0	0	0	0	0	0	0	0	0	0	0	0	0	0
BC-0345723668	0	0	0	0	0	0	0	0	0	0	0	0	0	0	0	0	0	0	0	0	0	0	0	0	0
BC-0345723670	0	0	0	0.000413593	0	0	0	0	0	0	0	0	0	0	0	0	0	0	0	0	0	0	0	0	0
BC-0345723673	0	0	0	0	0	0	0	0	0	0	0	0	0	0	0	0	0	0	0	0	0	0	0	0	0
BC-0345723677	0	0	0	0	0	0	0	0	0	0	0	0	0	0	0	0	0	0	0	0	0	0	0	0	0
BC-0345723678	0	0	0	0	0	0	0	0	0	0	0	0	0	0	0	0	0	0	0	0	0	0	0	0	0
BC-0345723680	0	0	0	0	0	0	0	0	0	0	0	0	0	0	0	0	0	0	0	7.45229e-05	0	0	0	0	0
BC-0345723681	0	0	0	0	0	0	0	0	0	0	0	0	0	0	0	0	0	0	0	0	0	0	0	0	0
BC-0345723683	0	0	0	0	0	0	0	0	0	0	0	0	0	0	0	0	0	0	0	0	0	0	0	0	0
BC-0345723687	0	0	0	0	0	0	0	0	0	0	0	0	0	0	0	0	0	0	0	0	0	0	0	0	0
BC-0345723689	0	0	0	0	0	0	0	0	0	0	0	0	0	0	0	0	0	0	0	0	0	0	0	0	0
BC-0345723693	0	0	0	0	0	0	0	0	0	0	0	0	0	0	0	0	0	0	0	0	0	0	0	0	0
BC-0345723694	0	0	0	0	0	0	0	0	0	0	0	0	0	0	0	0	0	0	0	0	0	0	0	0	0
BC-0345723695	0.0003342	0	0	0	0	0	0	0	4.1775e-05	0	0	0	0	0	0	0	0	0	0	0.765146	0	0	0	0	0
BC-0345723696	0	0	0	0	0	0	0	0	0	0	0	0	0	0	0	0	0	0	0	0	0	0	0	0	0
BC-0345723698	0	0	0	0	0	0	0	0	0	0	0	0	0	0	0	0	0	0	0	0	0	0	0	0	0
BC-0345723699	0	0	0	0	0	0	0	0	0	0	0	0	0	0	0	0	0	0	0	0	0	0	0	0	0
BC-0345723766	0	0	0	0	0	0	0	0	0	0	0	0	0	0	0	0	0	0	0	0	0	0	0	0	0
BC-0345724469	0	0	0	0	0	0	0	0	0	0	0	0	0	0	0	0	0	0	0	0	0	0	0	0	0
BC-0345724473	0.000248304	0	0	0	0	0	0	0	0	0	0	0	0	0	0	0	0	0	0	0.550108	0	0	0	0	0
BC-0345724475	0.000131547	0	0	0	0	0	0	0	0	0	0	0	0	0	0	0	0	0	0	0.377796	0	0	0	0	0
BC-0345724478	0	0	0	0	0	0	0	0	0	0	0	0	0	0	0	0	0	0	0	0	0	0	0	0	0
BC-0345724481	0	0	0	0	0	0	0	0	0	0.000245344	0	0	0	0	0	0	0	0	0	0	0	0	0	0	0
BC-0345724482	0	0	0	0	0	0	0	0	0	0	0	0	0	0	0	0	0	0	0	0	0	0	0	0	0
BC-0345724483	0	0	0	0	0	0	0	0	0	0	0	0	0	0	0	0	0	0	0	0	0	0	0	0	0
BC-0345724489	0	0	0	0	0	0	0	0	0	0	0	0	0	0	0	0	0	0	0	0.0159499	0	0	0	0	0
BC-0345724490	0	0	0	0	0	0	0	0	0	0.000127228	0	0	0	0	0	0	0	0	0	0	0	0	0	0	0
BC-0345724491	0	0	0	0	0	0	0	0	0	0	0	0	0	0	0	0	0	0	0	0	0	0	0	0	0
BC-0345724493	0	0	0	0	0	0	0	0	0	0	0	0	0	0	0	0	0	0	0	0	0	0	0	0	0
BC-0345724494	0.000194223	0	0	0	0	0	0	0	0	8.05313e-05	0	0	0	0	0	0	0	0	0	0.535732	0	0	0	0	0
BC-0345724496	0.000202423	0	0	0	0	0	0	0	0	0	0	0	0	0	0	0	0	0	4.45332e-05	0.441769	0	0	0	0	0
BC-0345724500	0	0	0	0	0	0	0	0	0	0	0	0	0	0	0	0	0	0	0	0	0	0	0	0	0
BC-0345724507	0	0	0	0	0	0	0	0	0	0	0	0	0	0	0	0	0	0	0	0	0	0	0	0	0
BC-0345724511	0	0	0	0	0	0	0	0	0	0	0	0	0	0	0	0	0	0	0	0.0233302	0	0	0	0	0
BC-0345724512	0	0	0	0	0	0	0	0	0	0	0	0	0	0	0	0	0	0	0	0	0	0	0	0	0
BC-0345724513	0	0	0	0.000239517	0	0	0	0	0	0	0	0	0	0	0	0	0	0	0	0	0	0	0	0	0
BC-0345724514	0	0	0	0	0	0	0	0	0	0	0	0	0	0	0	0	0	0	0	0	0	0	0	0	0
BC-0345724521	0.000165474	0	0	0	0	0	0	0	0	0	0	0	0	0	0	0	0	0	0	0.521704	0	0	0	0	0
BC-0345724525	0	0	0	0	0	0	0	0	0	0	0	0	0	0	0	0	0	0	0	0	0	0	0	0	0
BC-0345724526	0	0	0	0	0	0	0	0	0	0	0	0	0	0	0	0	0	0	0	0	0	0	0	0	0
BC-0345724530	0	0	0	0	0	0	0	0	0	0	0	0	0	0	0	0	0	0	0	0	0	0	0	0	0
BC-0345724531	0	0	0	0	0	0	0	0	0	0	0	0	0	0	0	0	0	0	0	0	0	0	0	0	0
BC-0345724534	0.000286699	0	0	0	0	0	0	0	8.04156e-05	0	0	0	0	0	0	0	0	0	0	0.552847	0	0	0	0	0
BC-0345724539	0	0	0	0	0	0	0	0	0	0	0	0	0	0	0	0	0	0	0	0	0	0	0	0	0
BC-0345724542	0	0	0	0	0	0	0	0	0	0	0	0	0	0	0	0	0	0	0	0	0	0	0	0	0
BC-0345730613	0	0	0	0	0	0	0	0	0	0	0	0	0	0	0	0	0	0	0	0	0	0	0	0	0
BC-0345730631	0	0	0	0	0	0	0	0	0	0	0	0	0	0	0	0	0	0	0	0	0	0	0	0	0
BC-0345730633	0	0	0	0	0	0	0	0	0	0	0	0	0	0	0	0	0	0	0	0	0	0	0	0	0
BC-0345730634	0	0	0	0	0	0	0	0	0	0	0	0	0	0	0	0	0	0	0	0	0	0	0	0	0
BC-0345730637	0	0	0	0	0	0	0	0	0	0	0	0	0	0	0	0	0	0	0	0	0	0	0	0	0
BC-0345730639	0	0	0	0	0	0	0	0	0	0	0	0	0	0	0	0	0	0	0	0	0	0	0	0	0
BC-0345730641	0	0	0	0	0	0	0	0	0	0	0	0	0	0	0	0	0	0	0	0	0	0	0	0	0
BC-0345730646	0	0	0	0	0	0	0	0	0	0	0	0	0	0	0	0	0	0	0	0	0	0	0	0	0
BC-0345730647	0	0	0	0	0	0	0	0	0	0	0	0	0	0	0	0	0	0	0	0	0	0	0	0	0
BC-0345730700	0	0	0	0.000208138	0	0	0	0	0	0	0	0	0	0	0	0	0	0	0	0	0	0	0	0	0
BC-0345730818	0	0	0	0	0	0	0	0	0	0	0	0	0	0	0	0	0	0	0	0.000210359	0	0	0	0	0
BC-0345730829	0	0	0	0	0	0	0	0	0	0	0	0	0	0	0	0	0	0	0	0	0	0	0	0	0
BC-0345731294	0	0	0	0	0	0	0	0	0	0	0	0	0	0	0	0	0	0	0	0	0	0	0	0	0
BC-0345731381	0	0	0	0	0	0	0	0	0	0	0	0	0	0	0	0	0	0	0	0	0	0	0	0	0
BC-0345731388	0	0	0	0	0	0	0	0	0	0	0	0	0	0	0	0	0	0	0	0	0	0	0	0	0
BC-0345731404	0	0	0	0	0	0	0	0	0	0	0	0	0	0	0	0	0	0	0	9.53918e-05	0	0	0	0	0
BC-0345731405	0	0	0	0	0	0	0	0	0	0	0	0	0	0	0	0	0	0	0	0	0	0	0	0	0
BC-0345731414	0	0	0	0	0	0	0	0	0.001066	0	0	0	0	0	0	0	0	0	0	0	0	0	0	0	0.000423264
BC-0345731431	0	0	0	0	0	0	0	0	0	0	0	0	0	0	0	0	0	0	0	0.0207925	0	0	0	0	0
BC-0345731435	0	0	0	0	0	0	0	0	0	0	0	0	0.000474303	0	0	0	0	0	0	0	0	0	0	0	0
BC-0345731488	0	0	0	0	0	0	0	0	0	0	0	0	0	0	0	0	0	0	0	0	0	0	0	0	0
BC-0345731594	0	0	0	0	0	0	0	0	0	0	0	0	0	0	0	0	0	0	0	0	0	0	0	0	0
BC-0345731600	0	0	0	0	0	0	0	0	0	0	0	0	0	0	0	0	0	0	0	0	0	0	0	0	0
BC-0345731776	0	0	0	0	0	0	0	0	0	0	0	0	0	0	0	0	0	0	0	0	0	0	0	0	0
BC-0345731813	0	0	0	0	0	0	0	0	0	0	0	0	0	0	0	0	0	0	0	0	0	0	0	0	0
BC-0345731814	0	0	0	0	0	0	0	0	0	0	0	0	0	0	0	0	0	0	0	0	0	0	0	0	0
BC-0345731834	0	0	0	0	0	0	0	0	0	0	0	0	0	0	0	0	0	0	0	0	0	0	0	0	0
BC-0345731839	0	0	0	0.000166645	0	0	0	0	0.000111096	0	0	0	0	0	0	9.02659e-05	0	0	0	0	0	0	0	0	0
BC-0345732070	0	0	0	8.46182e-05	0	0	0	0	0	0	0	0	0	0	0	0	0	0	0	0	0	0	0	0	0
BC-0345732080	0	0	0	0	0	0	0	0	0	0	0	0	0	0	0	0	0	0	0	0	0	0	0	0	0
BC-0345732081	0	0	0	0	0	0	0	0	0	0	0	0	0	0	0	0	0	0	0	0	0	0	0	0	0
BC-0345732144	0	0	0	0	0	0	0	0	0	0	0	0	0	0	0	0	0	0	0	0	0	0	0	0	0
BC-0345732147	0	0	0	0	0	0	0	0	0	0	0	0	0	0	0	0	0	0	0	0	0	0	0	0	0
BC-0345792160	0	0	0	0	0	0	0	0	0	0	0	0	0	0	0	0	0	0	0	8.23791e-05	0	0	0	0	0.000263613
BC-0345792195	0	0	0	0	0	0	0	0	0	0	0	0	0	0	0	0	0	0	0	0.0138118	0	0	0	0	0
BC-0345792199	0	0	0	0	0	0	0	0	0	0	0	0	0	0	0	0	0	0	0	0.0188727	0	0	0	0	0
BC-0345792216	0	0	0	0	0	0	0	0	0	0	0	0	0	0	0	0	0	0	0	0.0148375	0	0	0	0	0
BC-0345793796	0	0	0	0	0	0	0	0	0	0	0	0	0	0	0	0	0	0	0	0	0	0	0	0	0
BC-0345793844	0	0	0	0	0	0	0	0	0	0	0	0	0	0	0	0	0	0	0	0.107223	0	0	0	0	0
BC-0345794078	0	0	0	0	0	0	0	0	0	8.2991e-05	0	0	0	0	0	0	0	0	0	0.00929499	0	0	0	0	0
BC-0345794085	0	0	0	0	0	0.000222176	0	0	0	0	0	0	0	0	0	0	0	0	0	0	0	0	0	0	0
BC-0345794089	0	0	0	0	0	0	0	0	0	0	0	0	0	0	0	0	0	0	0	0.0968752	0	0	0	0	0
BC-0345794106	0	0	0	0	0	0	0	0	0	0	0	0	0	0	0	0	0	0	0	0	0	0	0	0	0
BC-0345794107	0	0	0	0	0	0	0	0	0	0	0	0	0	0	0	0	0	0	0	0.0750134	0	0	0	0	0
BC-0345794110	0	0	0	0	0	0	0	0	0	0	0	0	0	0	0	0	0	0	0	0.150893	0	0	0	0	0
BC-0345794125	0	0	0	0	0	0	0	0	0	0	0	0	0	0	0	0	0	0	0	0.0199298	0	0	0	0	0
BC-0345795864	0	0	0	0	0	0	0	0	0	0	0	0	0	0	0	0	0	0	0	0.00800309	0	0	0	0	0
BC-0345795896	0	0	0	0	0	0	0	0	0	0	0	0	0	0	0	0	0	0	0	0.00258727	0	0	0	0	0
BC-0345796581	0	0	0	0	0	0	0	0	0	0	0	0	0	0	0	0	0	0	0	0.0200932	0	0	0	0	0
BC-0345796619	0.000169029	0	0	0	0	0	0	0	0.00014598	0	0	0	0	0	0	0	0	0	0	0.282417	0	0	0	0	0
BC-0345797157	0	0	0	0	0	0	0	0	0	0	0	0	0	0	0	0	0	0	0	0.0383716	0	0	0	0	0
BC-0345797185	0	0	0	0	0	0	0	0	0	0	0	0	0	0	0	0	0	0	0	0.0238298	0	0	0	0	0
BC-0345797312	0	0	0	0	0	0	0	0	0	0	0	0	0	0	0	0	0	0	0	0.00311485	0	0	0	0	0
BC-0345797317	0	0	0	0	0	0	0	0	0	0	0	0	0	0	0	0	0	0	0	0.00137938	0	0	0	0	0
BC-0345797632	0	0	0	0	0	0	0	0	0	0	0	0	0	0	0	0	0	0	0	0.0447277	0	0	0	0	0
BC-0345797636	0	0	0	0	0	0	0	0	0	0	0	0	0	0	0	0	0	0	0	0.0151592	0	0	0	0	0.000164662
BC-0345797641	0	0	0	0	0	0	0	0	0	0	0	0	0	0	0	0	0	0	0	0.0142129	0	0	0	0	0
BC-0345797645	0.000373767	0	0	0	0	0	0	0	0	0	0.000354808	0	0	0	0	0	0	0	0	0.774174	0	0	0	0	0.00026272
BC-0345797686	0	0	0	0	0	0	0	0	0	0	0	0	0	0	0	0	0	0	0	0.00420433	0	0	0	0	0
BC-0345797802	0.000184654	0	0	0	0	0	0	0	0	0	0	0	0	0	0	0	0	0	0	0.20544	0	0	0	0	0
BC-0345797815	0	0	0	0	0	0	0	0	0	0	0	0	0	0	0	0	0	0	0	0.082414	0	0	0	0	0
BC-0345797817	0	0	0	0	0	0	0	0	0	0	0	0	0	0	0	0	0	0	0	0.075613	0	0	0	0	0
BC-0345797839	0	0	0	0	0	0	0	0	0	0	0	0	0	0	0	0	0	0	0	0.0334256	0	0	0	0	0
BC-0345798087	0	0	0	0	0	0	0	0	0	0	0	0	0	0	0	0	0	0	0	0.0248512	0	0	0	0	0
BC-0345798171	0	0	0	0	0	0	0	0	0	0	0	0	0	0	0	0	0	0	0	0.00534456	0	0	0	0	0
BC-0345798178	0	0	0	0	0	0	0	0	0	0	0	0	0	0	0	0	0	0	0	0	0	0	0	0	0
BC-0345798179	0	0	0	0	0	0	0	0	0	0	0	0	0	0	0	0	0	0	0	0.00738165	0	0	0	0	0
BC-0345798187	0	0	0	0	0	0	0	0	0	0	0	0	0	0	0	0	0	0	0	0.0026096	0	0	0	0	0
BC-0345798197	0	0	0	0	0	0	0	0	0	0	0	0	0	0	0	0	0	0	0	0.00715187	0	0	0	0	0
BC-0345798199	0	0	0	0	0	0	0	0	0	0	0	0	0	0	0	0	0	0	0	0	0	0	0	0	0
BC-0345798203	0	0	0	0	0	0	0	0	0	0	0	0	0	0	0	0	0	0	0	0	0	0	0	0	0
BC-0345798205	0	0	0	0	0	0	0	0	0	0	0	0	0	0	0	0	0	0	0	0.000407828	0	0	0	0	0
BC-0345798211	0	0	0	0	0	0	0	0	0	0	0	0	0	0	0	0	0	0	0	0	0	0	0	0	0
BC-0345798216	0	0	0	0	0	0	0	0	0	0	0	0	0	0	0	0	0	0	0	0	0	0	0	0	0
BC-0345798219	0	0	0	0	0	0	0	0	0	0	0	0	0	0	0	0	0	0	0	0.0153503	0	0	0	0	0
BC-0345798224	0	0	0	0	0	0	0	0	0	0	0	0	0	0	0	0	0	0	0	0.0125905	0	0	0	0	0
BC-0345798229	0	0	0	0	0	0	0	0	0	0	0	0	0	0	0	0	0	0	0	0	0	0	0	0	0
BC-0345798748	0	0	0	0	0	0	0	0	0	0	0	0	0	0	0	0	0	0	0	0	0	0	0	0	0
BC-0345798781	0.000527438	0	0	0	0	0	0	0	0.000281737	0	0	0	0	0	0	0	0	0	0.000311221	0.692533	0	0	0	0	0
BC-0345798782	0	0	0	0	0	0	0	0	0	0	0	0	0	0	0	0	0	0	0	0.015292	0	0	0	0	0
BC-0345798786	0	0	0	0	0	0	0	0	0	0	0	0	0	0	0	0	0	0	0	0	0	0	0	0	0
BC-0345798795	0	0	0	0	0	0	0	0	0	0	0	0	0	0	0	0	0	0	0	0.0149178	0	0	0	0	0
BC-0345798812	0	0	0	0	0	0	0	0	0	0	0	0	0	0	0	0	0	0	0	0.10038	0	0	0	0	0
BC-0345798819	0	0	0	0	0	0	0	0	0	0	0	0	0	0	0	0	0	0	0	0.00870741	0	0	0	0	0
BC-0345798830	0	0	0	0	0	0	0	0	0	0	0	0	0	0	0	0	0	0	0	0.0408045	0	0	0	0	0
BC-0345798832	0	0	0	0	0	0	0	0	0	0	0	0	0	0	0	0	0	0	0	0.0289532	0	0	0	0	0
BC-0345798833	0	0	0	0	0	0	0	0	0	0	0	0	0	0	0	0	0	0	0	0.0156229	0	0	0	0	0
BC-0345798878	0	0	0	0	0	0	0	0	0	0.000190392	0	0	0	0	0	0	0	0	0	0.0301453	0	0	0	0	0
BC-0345798888	0	0	0	0	0	0	0	0	0	0	0	0	0	0	0	0	0	0	0	0	0	0	0	0	0
BC-0345798900	0	0	0	0	0	0	0	0	0	0.000109812	0	0	0	0	0	0	0	0	0	0.0438911	0	0	0	0	0
BC-0345798902	0	0	0	0	0	0	0	0	0	0	0	0	0	0	0	0	0	0	0	0	0	0	0	0	0
BC-0345798931	0	0	0	0	0	0	0	0	0	0	0	0	0	0	0	0	0	0	0	0.0718381	0	0	0	0	0
BC-0345798938	0	0	0	0	0	0	0	0	0	0	0	0	0	0	0	0	0	0	0	0.0432419	0	0	0	0	0
BC-0345798943	0	0	0	0	0	0	0	0	0	0	0	0	0	0	0	0	0	0	0	0.0165639	0	0	0	0	0
BC-0345798952	0	0	0	0	0	0	0	0	0	0	0	0	0	0	0	0	0	0	0	0.0324273	0	0	0	0	0
BC-0345798961	0	0	0	0	0	0	0	0	0	6.09723e-05	0	0	0	0	0	0	0	0	0	0.0101763	0	0	0	0	0
BC-0345798972	0	0	0	0	0	0	0	0	0	0	0	0	0	0	0	0	0	0	0	0.00425498	0	0	0	0	0
BC-0345798991	0	0	0	0	0	0	0	0	0	0	0	0	0	0	0	0	0	0	0	0.0736034	0	0	0	0	0
BC-0345798992	0	0	0	0	0	0	0	0	0	0	0	0	0	0	0	0	0	0	0	0.0240234	0	0	0	0	0
BC-0345799000	0	0	0	0	0	0	0	0	0	0	0	0	0	0	0	0	0	0	0	0	0	0	0	0	0
BC-0345799013	0	0	0	0	0	0	0	0	0	0	0	0	0	0	0	0	0	0	0	0.0512723	0	0	0	0	0
BC-0345799025	0	0	0	0	0	0	0	0	0	0	0	0	0	0	0	0	0	0	0	0.0106763	0	0	0	0	0
BC-0345799029	0.000735596	0	0	0	0	0	0	0	0	0	0	0	0	0	0	0	0	0	0	0.328203	0	0	0	0	0
BC-0345799128	0	0	0	0	0	0	0	0	0	0	0	0	0	0	0	0	0	0	0	0.092238	0	0	0	0	0
BC-0345799145	0	0	0	0	0	0	0	0	0	0	0	0	0	0	0	0	0	0	0	0	0	0	0	0	0
BC-0345799166	0	0	0	0	0	0	0	0	0	0	0	0	0	0	0	0	0	0	0	0	0	0	0	0	0
BC-0345799183	0	0	0	0	0	0	0	0	0	0	0	0	0	0	0	0	0	0	0	0.00185221	0	0	0	0	0
BC-0345805764	0	0	0	0	0	0	0	0	0	0	0	0	0	0	0	0	0	0	0	0	0	0	0	0	0
BC-0345805782	0.000213591	0	0	0	0	0	0	0	0	0	0	0	0	0	0	0	0	0	0	0.465662	0	0	0	0	0
BC-0345805783	0	0	0	0	0	0	0	0	0	0	0	0	0	0	0	0	0	0	0	0.153172	0	0	0	0	6.32992e-05
BC-0345805806	0	0	0	0	0	0	0	0	0	0	0	0	0	0	0	0	0	0	0	0	0	0	0	0	0
BC-0345807110	0	0	0	0	0	0	0	0	0	0	0	0	0	0	0	0	0	0	0	0.0123018	0	0	0	0	0
BC-0361053712	0	0	0	0	0	0	0	0	0	0	0	0	0	0	0	0	0	0	0	0.00388273	0	0	0	0	0
BC-0361053718	0	0	0	0	0	0	0	0	0	0	0	0	0	0	0	0	0	0	0	0.0592605	0	0	0	0	0
BC-0361053744	0	0	0	0	0	0	0	0	0	0	0	0	0	0	0	0	0	0	0	0.121953	0	0	0	0	0
BC-0361053753	0	0	0	0	0	0	0	0	0	0	0	0	0	0	0	0	0	0	0	0.00172335	0	0	0	0	0
BC-0361054258	0.000761455	0	0	0	0	0	0	0	0	0	0	0	0	0	0	0	0	0	0	0.280038	0	0	0	0	0
BC-0361054290	0	0	0	0	0	0	0	0	0	0	0	0	0	0	0	0	0	0	0	0.109666	0	0	0	0	0
BC-0361056946	0	0	0	0	0	0	0	0	0.000139048	0	0	0	0	0	0	0	0	0	0	0.160247	0	0	0	0	0
BC-0361057008	0	0	0	0	0	0	0	0	0	0	0	0	0	0	0	0	0	0	0	0.0165386	0	0	0	0	0
BC-0361057023	0	0	0	0	0	0	0	0	0	0	0	0	0	0	0	0	0	0	0	0.0137201	0	0	0	0	0
BC-0361057038	0	0	0	0	0	0	0	0	0	0	0	0	0	0	0	0	0	0	0	0.0255173	0	0	0	0	0
BC-0361057076	0	0	0	0	0	0	0	0	0	0	0	0	0	0	0	0	0	0	0	0.0265313	0	0	0	0	0
BC-0361057091	0	0	0	0	0	0	0	0	0	0	0	0	0	0	0	0	0	0	0	0.192805	0	0	0	0	0
BC-0361078455	0.000413416	0	0	0	0	0	0	0	0.000145461	0	0	0	0	0	0	0	0	0	0	0.27669	0	0	0	0	0
BC-0361078892	0	0	0	0	0	0	0	0	0	0	0	0	0	0	0	0	0	0	0	0.0708901	0	0	0	0	0
BC-0361082863	0	0	0	0	0	0	0	0	0	0	0	0	0	0	0	0	0	0	0	0.0716646	0	0	0	0	0
BC-0361099242	0	0	0	0	0	0	0	0	0	0	0	0	0	0	0	0	0	0	0	0.00250606	0	0	0	0	0
BC-0361099254	0	0	0	0	0	0	0	0	0	0	0	0	0	0	0	0	0	0	0	0	0	0	0	0	0
BC-0361099260	0	0	0	0	0	0	0	0	0	0	0	0	0	0	0	0	0	0	0	0.000180987	0	0	0	0	0
BC-0361099262	0	0	0	0	0	0	0	0	0	0	0	0	0	0	0	0	0	0	0	0	0	0	0	0	0
BC-0361099832	0	0	0	0	0	0	0	0	0	0	0	0	0	0	0	0	0	0	0	0	0	0	0	0	0
BC-0361099948	0	0	0	0	0	0	0	0	0	0	0	0	0	0	0	0	0	0	0	0	0	0	0	0	0
BC-0361100844	0	0	0	0	0	0	0	0	0	0	0	0	0	0	0	0	0	0	0	0	0	0	0	0	0
BC-0361100856	0	0	0	0	0	0	0	0	0	0	0	0	0	0	0	0	0	0	0	0	0	0	0	0	0
BC-0361102984	0	0	0	0	0	0	0	0	0	0	0	0	0	0	0	0	0	0	0	0	0	0	0	0	0
BC-0361124410	0	0	0	0	0	0	0	0	0	0	0	0	0	0	0	0	0.000499336	0	0	0	0	0	0	0	0
negative_control_MetaCoV_BC-00181049R_2020-05-20	0	0	0	0	0	0	0	0	0	0	0	0	0	0	0	0	0	0	0	0	0	0	0	0	0
negative_control_MetaCoV_BC-01263416R_2020-05-22	0	0	0	0	0	0	0	0	0	0	0	0	0	0	0	0	0	0	0	0	0	0	0	0	0
neg_control_MetaCoV_BC-01315667R_2020-05-26	0	0	0	0	0	0	0	0	0	0	0	0	0	0	0	0	0	0	0	0	0	0	0	0	0
Neg_run1Poland	0	0	0	0	0	0	0	0	0	0	0	0	0	0	0	0	0	0	0	2.84738e-05	0	0	0	0	0
pos_control_MetaCoV_BC-01315667R_2020-05-26	0	0	0	0	0	0	0	0	0	0	0	0	0	0	0	0	0	0	0	0	0	0	0	0	0
positive_control_MetaCoV_BC-00181049R_2020-05-20	0	0	0	0	0	0	0	0	0	0	0	0	0	0	0	0	0	0	0	0	0	0	0	0	0
Positive_control_MetaCoV_BC-01263416R_2020-05-22	0	0	0	0	0	0	0	0	0	0	0	0	0	0	0	0	0	0	0	0	0	0	0	0	0
positive_control_MetaCoV_BC-01319924R_2020-06-19	0	0	0	0	0	0	0	0	0	0	0	0	0	0	0	0	0	0	0	0.000490173	0	0	0	0	0
Pos_run1Poland	0	0	0	0	0	0	0	0	0	0	0	0	0	0	0	0	0	0	0	0	0	0	0	0	0
SRR17481175	0	0	0	0	0	0	0	0	0	0	0	0	0	0	0	0	0	0	0	0	0	0	0	0	0
SRR17481176	0	0	0	0	0	0	0	0	0	0	0	0	0	0	0	0	0	0	0	0	0	0	0	0	0
SRR17481177	0	0	0	0	0	0	0	0	0	0	0	0	0	0	0	0	0	0	0	0	0	0	0	0	0
SRR17481178	0	0	0	0	0	0	0	0	0	0	0	0	0	0	0	0	0	0	0	0	0	0	0	0	0
SRR17481179	0	0	0	0	0	0	0	0	0	0	0	0	0	0	0	0	0	0	0	0	0	0	0	0	0
SRR17481180	0	0	0	0	0	0	0	0	0	0	0	0	0	0	0	0	0	0	0	0	0	0	0	0	0
SRR17481181	0	0	0	0	0	0	0	0	0	0	0	0	0	0	0	0	0	0	0	0	0	0	0	0	0
SRR17481182	0	0	0	0	0	0	0	0	0	0	0	0	0	0	0	0	0	0	0	0	0	0	0	0	0
SRR17481183	0	0	0	0	0	0	0	0	0	0	0	0	0	0	0	0	0	0	0	0	0	0	0	0	0
SRR17481184	0	0	0	0	0	0	0	0	0	0	0	0	0	0	0	0	0	0	0	0	0	0	0	0	0
SRR17481187	0	0	0	0	0	0	0	0	0	0.000464792	0	0	0	0	0	0	0	0	0	0	0	0	0	0	0
SRR17481188	0	0	0	0	0	0	0	0	0	0	0	0	0	0	0	0	0	0	0	0	0	0	0	0	0
SRR17481189	0	0	0	0	0	0	0	0	0	0	0	0	0	0	0	0	0	0	0.00132943	0	0	0	0	0	0
SRR17481190	0	0	0	0	0	0	0	0	0	0	0	0	0	0	0	0	0	0	0	0	0	0	0	0	0
SRR17481195	0	0	0	0	0	0	0	0	0	0	0	0	0	0	0	0	0	0	0	2.0584e-05	0	0	0	0	0
SRR17481198	0	0	0	0	0	0	0	0	0	0	0	0	0	0.00146154	0	0	0	0	0	0	0	0	0	0	0
SRR17481199	0	0	0	0	0	0	0	0	0	0	0	0	0	0	0	0	0	0	0	0	0	0	0	0	0
SRR17481200	0	0	0	0	0	0	0	0	0	0	0	0	0	0	0	0	0	0	0	0	0	0	0	0	0
SRR17481201	0	0	0	0	0	0	0	0	0	0	0	0	0	0	0	0	0	0	0	0	0	0	0	0	0
SRR17481202	0	0	0	0	0	0	0	0	0	0	0	0	0	0	0	0	0	0	0	0	0	0	0	0	0
SRR17481203	0	0	0	0	0	0	0	0	0	0	0	0	0	0	0	0	0	0	0	0	0	0	0	0	0
SRR17481204	0	0	0	0	0	0	0	0	0	0	0	0	0	0	0	0	0	0	0	0	0	0	0	0	0
SRR17481206	0	0	0	0	0	0	0	2.06577e-06	0	0	0	0	0	0	0	0	0	0	0	1.7559e-05	0	0	0	0	0
SRR17481212	0	0	0	0	0	0	0	0	0	0	0	0	0.000575284	0	0	0	0	0	0	0	0	0	0	0	0
SRR17481213	0	0	0	0	0	0	0	0	0	0	0	0	0	0	0	0	0	0	0	0	0	0	0	0	0
SRR17481214	0	0	0	0	0	0	0	0	0	0	0	0	0	0	0	0	0	0	0	0	0	0	0	0	0
SRR17481215	0	0	0	0	0	0	0	0	0	0	0	0	0	0	0	0	0	0	0	0	0	0	0	0	0
SRR17481216	0	0	0	0	0	0	0	0	0	0	0	0	0	0	0	0	0	0	0	0	0	0	0	0	0
SRR17481217	0	0	0	0	0	0	0	0	0	0	0	0	0	0	0	0	0	0	0	0	0	0	0	0	0
SRR17481218	0	0	0	0	0	0	0	0	0	0	0	0	0	0	0	0	0	0	0	0	0	0	0	0	0
SRR17481219	0	0	0	0	0	0	0	0	0	0	0	0	0	0	0	0	0	0	0	0	0	0	0	0	0
SRR17481220	0	0	0	0	0	0	0	0	0	0	0	0	0	0	0	0	0	0	0	0	0	0	0	0	0
SRR17481221	0	0	0	0	0	0	0	0	0	0	0	0	0	0	0	0	0	0	0	0	0	0	0	0	0
SRR17481222	0	0	0	0	0	0	0	0	0	0	0	0	0	0	0	0	0	0	0	0	0	0	0	0	0
SRR17481223	0	0	0	0	0	0	0	0	0	0	0	0	0	0	0	0	0	0	0	0	0	0	0	0	0
SRR17481224	0	0	0	0	0	0	0	0	0	0	0	0	0	0	0	0	0	0	0	0	0	0	0	0	0
SRR17481225	0	0	0	0	0	0	0	0	0	0	0	0	0	0	0	0	0.000401768	0	0	0	0	0	0	0	0
SRR17481226	0	0	0	0	0	0	0	0	0	0	0	0	0	0	0	0	0	0	0	0	0	0	0	0	0
SRR17481227	0.0013964	0	0	0	0	0	0	0	0	0	0	0	0	0	0	0	0	0	0	0	0	0	0	0	0
SRR17481228	0	0	0	0	0	0	0	0	0	0	0	0	0	0	0	0	0	0	0	0	0	0	0	0	0
SRR17481229	0.00142886	0	0	0	0	0	0	0	0	0	0	0	0	0	0	0	0	0	0	0	0	0	0	0	0
SRR17481230	0	0	0	0	0	0	0	0	0	0	0	0	0	0	0	0	0	0	0	0	0	0	0	0	0
SRR17481231	0	0	0	0	0	0	0	0	0	0	0	0	0	0	0	0	0	0	0	0	0	0	0	0	0
SRR17481232	0	0	0	0	0	0	0	0	0	0	0	0	0	0	0	0	0	0	0	0	0	0	0	0	0
SRR17481233	0	0	0	0	0	0	0	0	0.000350977	0	0	0	0	0	0	0	0	0	0	0	0	0	0	0	0
SRR17481234	0	0	0	0	0	0	0	0	0	0	0	0	0	0	0	0	0	0	0	0	0	0	0	0	0
SRR17481235	0	0	0	0	0	0	0	0	0	0	0	0	0	0	0	0	0	0	0	0	0	0	0	0	0
SRR17481236	0	0	0	0	0	0	0	0	0	0	0	0	0	0	0	0	0	0	0	0	0	0	0	0	0
SRR17481237	0	0	0	0	0	0	0	0	0	0	0	0	0	0	0	0	0	0	0	0	0	0	0	0	0
SRR17481238	0	0	0	0	0	0	0	0	0	0	0	0	0	0	0	0	0	0	0	0	0	0	0	0	0
SRR17481239	0	0	0	0	0	0	0	0	0	0	0	0	0	0	0	0	0	0	0	0	0	0	0	0	0
SRR17481240	0	0	0	0	0	0	0	0	0	0	0	0	0	0	0	0	0	0	0	0	0	0	0	0	0
SRR17481241	0	0	0	0	0	0	0	0	0	0	0	0	0	0	0	0	0	0	0	0	0	0	0	0	0
SRR17481242	0	0	0	0	0	0	0	0	0.000294374	0	0	0	0	0	0	0	0	0	0	0	0	0	0	0	0
SRR17481243	0	0	0	0	0	0	0	0	0	0	0	0	0	0	0	0	0	0	0	0	0	0	0	0	0
SRR17481244	0	0	0	0	0	0	0	0	0	0	0	0	0	0	0	0	0	0	0	0	0	0	0	0	0
SRR17481245	0	0	0	0	0	0	0	0	0	0	0	0	0	0	0	0	0	0	0	0	0	0	0	0	0
SRR17481246	0	0	0	0	0	0	0	0	0	0	0	0	0	0	0	0	0	0	0	0	0	0	0	0	0
SRR17481247	0	0	0	0	0	0	0	0	0	0	0	0	0	0	0	0	0	0	0	0	0	0	0	0	0
SRR17481248	0	0	0	0	0	0	0	0	0	0	0	0	0	0	0	0	0	0	0	0	0	0	0	0	0
SRR17481249	0	0	0	0	0	0	0	0	0	0	0	0	0	0	0	0	0	0	0	0	0	0	0	0	0
SRR17481250	0	0	0	0	0	0	0	0	0	0	0	0	0	0	0	0	0	0	0	0	0	0	0	0	0
SRR17481251	0	0	0	0	0	0	0	0	0	0	0	0	0	0	0	0	0	0	0	0	0	0	0	0	0
SRR17497039	0	0	0	0	0	0	0	0	0	0	0	0	0	0	0	0	0	0	0	0	0	0	0	0	0
SRR17497040	0	0	0	0	0	0	0	0	0	0	0	0	0	0	0	0	0	0	0	0	0	0	0	0	0
SRR17497041	0	0	0	0	0	0	0	0	0	0	0	0	0	0	0	0	0	0	0	0	0	0	0	0	0
SRR17497042	0	0	0	0	0	0	0	0	0	0	0	0	0	0	0	0	0	0	0	0	0	0	0	0	0
SRR17497043	0	0	0	0	0	0	0	0	0	0	0	0	0	0	0	0	0	0	0	0	0	0	0	0	0
SRR17497045	0	0	0	0	0	0	0	0	0	0	0	0	0	0	0	0	0	0	0	0	0	0	0	0	0
SRR17497046	0	0	0	0	0	0	0	0	0.000112167	0	0	0	0	0	0	0	0	0	0	0	0	0	0	0	0
SRR17497047	0	0	0	0	0	0	0	0	0	0	0	0	0	0	0	0	0	0	0	0	0	0	0	0	0
SRR17497048	0	0	0	0	0	0	0	0	0	0	0	0	0	0	0	0	0	0	0	0	0	0	0	0	0
SRR17497049	0	0	0	0	0	0	0	0	0	0	0	0	0	0	0	0	0	0	0	0	0	0	0	0	0
SRR17497050	0	0	0	0	0	0	0	0	0	0	0	0	0	0	0	0	0	0	0	0	0	0	0	0	0
SRR17497051	0	0	0	0	0	0	0	0	0	0	0	0	0	0	0	0	0	0	0	0	0	0	0	0	0
SRR17497052	0	0	0	0	0	0	0	0	0	0	0	0	0	0	0	0	0	0	0	0	0	0	0	0	0
SRR17497053	0	0	0	0	0	0	0	0	3.95159e-05	0	0	0	0	0	0	0	0	0	0	0	0	0	0	0	0
SRR17497054	0	0	0	0	0	0	0	0	0	0	0	0	0	0	0	0	0	0	0	0	0	0	0	0	0
SRR17497055	0	0	0	0	0	0	0	0	0	0	0	0	0	0	0	0	0	7.59363e-05	0	0	0	0	0	0	0
SRR17497056	0	0	0	0	0	0	0	0	3.97121e-05	0	0	0	0	0	0	0	0	0	0	0	0	0	0	0	0
SRR17497057	0	0	0	0	0	0	0	0	0	0	0	0	4.95616e-05	0	0	0	0	0	0	0	0	0	0	0	0
SRR17497058	0	0	0	0	0	0	0	0	0	0	0	0	7.45101e-05	0	0	0	0	0	0	0	0	0	0	0	0
SRR17497059	0	0	0	0	0	0	0	0	0	0	0	0	0.000105773	0	0	5.47102e-05	4.01208e-05	0	0	0	0	0	0	0	0
SRR17497060	0	0	0	0	0	0	0	0	0	0	0	0	0	0	0	0	0	0	0	0	0	0	0	0	0
SRR17497061	0	0	0	0	0	0	0	0	0	0	0	0	0	0	0	0	0	0	0	0	0	0	0	0	0
SRR17497062	0	0	0	0	0	0	0	0	0	0	0	0	0	0	0	0	9.88872e-06	0	0	0	0	0	0	0	0
SRR17497063	0.000349773	0	0	0	0	0	0.000349773	0	0.000349773	0	0	0	0	0	0	0	0	0	0	0	0	0	0	0	0
SRR17497064	0	0	0	0	0	0	0	0	0	0	0	0	0	0	0	0	0	0	0	0	0	0	0	0	0
SRR17497065	0	0	0	0	0	0	0	0	0	0	0	0	0	0	0	0	0	0	0	0	0	0	0	0	0
SRR17497066	0	0	0	0	0	0	0	0	0	0	0	0	0	0	0	7.74973e-05	6.01e-05	0	0	0	0	0	0	0	0
SRR17497067	0	0	0	0	0	0	0	0	1.76599e-05	0	0	0	0	0	0	0	0	0	0	0	0	0	0	0	0
SRR17497068	0	0	0	0	0	0	0	0	0	0	0	0	0	0	0	0	0	0	0	0	0	0	0	0	0
SRR17497069	0	0	0	0	0	0	0	0	0	0	0	0	0	0	0	0	0	0	0	0	0	0	0	0	0
SRR17497070	0	0	0	0	0	0	0	0	0	0	0	0	0	0	0	0	0	0	0	0	0	0	0	0	0
SRR17497071	0	0	0	0	0	0	0	0	0	0	0	0	0	0	0	0	0	0	0	0	0	0	0	0	0
SRR17497072	0	0	0	0	0	0	0	0	0	0	0	0	0	0	0	0	0	0	0	1.66459e-05	0	0	0	0	0
SRR17497073	0	0	0	0	0	0	0	0	0	0	0	0	0	0	0	0	0	0	0	0	0	0	0	0	0
SRR17497074	0	0	0	0	0	0	0	0	0	0	0	0	0	0	0	0	0	0	0	0	0	0	0	0	0
SRR17497075	0	0	0	0	0	0	0	0	0	0	0	0	0	0	0	0	0	0	0	0	0	0	0	0	0
SRR17497076	0	0	0	0	0	0	0	0	0	0	0	0	0	0	0	0	0	0	0	0	0	0	0	0	0
SRR17497077	0	0	0	0	0	0	0	0	0	0	0	0	0	0	0	0	0	0.00308145	0	0	0	0	0	0	0
SRR17497078	0	0	0	0	0	0	0	0	0	0	0	0	0	0	0	0	0	0	0	0	0	0	0	0	0
SRR17497079	0	0	0	0	0	0	0	0	0	0	0	0	0	0	0	0	0	0	0	0	0	0	0	0	0
SRR17497080	0	0	0	0	0	0.00234101	0	0	0	0	0	0	0	0	0	0	0	0	0	0	0	0	0	0	0
SRR17497081	0	0	0	0	0	0	0	0	0	0	0	0	0	0	0	0	0	0	0	0	0	0	0	0	0
SRR17497082	0	0	0	0	0	0	0	0	0	0	0	0	0	0	0	0	0	0	0	0	0	0	0	0	0
SRR17497083	0	0	0	0	0	0	0	0	0	0	0	0	0	0	0	0	0	0	0	0	0	0	0	0	0
SRR17497084	0	0	0	0	0	0	0	0	0.000144667	0	0	0	0	0	0	0	0	0	0	0	0	0	0	0	0.000506334
SRR17497085	0	0	0	0	0	0	0	0	0	0	0	0	0	0	0	0	0	0	0	0	0	0	0	0	0
SRR17497086	0	0	0	0	0	0	0	0	0	0	0	0	0	0	0	0	0	0	0	0	0	0	0	0	0
SRR17497087	0	0	0	0	0	0	0	0	0	0	0	0	0	0	0	0	0	0	0	0	0	0	0	0	0
SRR17497088	0	0	0	0	0	0	0	0	0	0	0	0	0	0	0	0	0	0	0	0	0	0	0	0	0
SRR17497089	0	0	0	0	0	0	0	0	0	0	0	0	0	0	0	0	0	0	0	0	0	0	0	0	0
SRR17497090	0	0	0	0	0	0	0	0	0	0	0	0	0	0	0	0	0	0	0	0	0	0	0	0	0
SRR17497092	0	0	0	0	0	0	0	0	0	0	0	0	0	0	0	0	0	0	0	0	0	0	0	0	0
SRR17497094	0	0	0	0	0	0	0	0	0	0	0	0	0	0	0	0	0	0	0	0	0	0	0	0	0
SRR17497095	0	0	0	0	0	0	0	0	0	0	0	0	0	0	0	0	0	0	0	0	0	0	0.00198845	0	0
SRR17497096	0	0	0	0	0	0	0	0	0	0	0	0	0	0	0	0	0	0	0	0	0	0	0	0	0
SRR17497097	0	0	0	0	0	0	0	0	7.47848e-05	0	0	0	0	0	0	0	0	0	0	6.15875e-05	0	0	0	0	0
SRR17497098	0	0	0	0	0	0	0	0	0.000285463	0	0	0	0	0	0	0	0	0	0	0	0	0	0	0	0
SRR17497099	0	0	0	0	0	0	0	0	0.000165541	0	0	0	0	0	0	0	0	0	0	0	0	0	0	0	0
SRR17497100	0	0	0	0	0	0	0	0	0.000373972	0	0	0	0	0	0	0	0	0	0	0	0	0	0	0	0
SRR17497101	0	0	0	0	0	0	0	0	0	0	0	0	0	0	0	0	0	0	0	0	0	0	0	0	0
SRR17497102	0	0	0	0	0	0	0	0	0	0	0	0	0	0	0	0	0	0	0	0	0	0	0	0	0
SRR17497103	0	0	0	0	0	0	0	0	0	0	0	0	0	0	0	0	0	0	0	0	0	0	0	0	0
SRR17497104	0	0	0	0	0	0	0	0	0	0	0	0	0	0	0	0	0	0	0	0	0	0	0	0	0
SRR17497105	0	0	0	0	0	0	0	0	0	0	0	0	0	0	0	0	0	0	0	0	0	0	0	0	0
SRR17497106	0	0	0	0	0	0	0	0	0	0	0	0	0	0	0	0	0	0	0	0	0	0	0	0	0
SRR17497107	0	0	0	0	0	0	0	0	0	0	0	0	0	0	0	0	0	0	0	0	0	0	0	0	0
SRR17497108	0	0	0	0	0	0	0	0	0	0	0	0	0	5.96168e-05	0	0	0.00010731	0	0	0	0	0	0	0	0
SRR17497109	0	0	0	0	0	0	0	0	1.78072e-05	0	0	0	0	0	0	0	0	0	0	0	0	0	0	0	0
SRR17497110	0	0	0	0	0	0	0	0	4.54428e-05	0	0	0	0	0	0	0	0	0	0	0	0	0	0	0	0
SRR17497111	0	0	0	0	0	0	0	0	0	0	0	0	0	0	0	0	0	0	0	0	0	0	0	0	0
SRR17497112	0	0	0	0	0	0	0	0	0	0	0	0	0	0	0	0	0	0	0	0	0	0	0	0	0
SRR17497113	0	0	0	0	0	0	0	0	0	0	0	0	0	0	0	0	0	0	0	0	0	0	0	0	0
SRR17497114	0	0	0	0	0	0	0	0	0	0	0	0	0	0	0	0	0	0	0	0	0	0	0	0	0
SRR17497115	0	0	0	0	0	0	0	0	0	0	0	0	0	0	0	0	0	0	0	0	0	0	0	0	0
SRR17497116	0	0	0	0	0	0	0	0	0	0	0	0	0	0	0	0	0	0	0	0.00177974	0	0	0	0	0
SRR17497117	0	0	0	0	0	0	0	0	0	0	0	0	0	0	0	0	0	0	0	0	0	0	0	0	0
SRR17497118	0	0	0	0	0	0	0	0	0	0	0	0	0	0	0	0	0	0	0	0	0	0	0	0	0
SRR17497119	0	0	0	0	0	0	0	0	0	0	0	0	0	0	0	0	0	0	0	0	0	0	0	0	0
SRR17497120	0	0	0	0	0	0	0	0	0	0	0	0	0	0	0	0	0	0	0	0	0	0	0	0	0
SRR17497121	0	0	0	0	0	0	0	0	0	0	0	0	0	0	0	0	0	0	0	0	0	0	0	0	0
SRR17497122	0	0	0	0	0	0	0	0	0	0	0	0	0	0	0	0	0	0	0	0	0	0	0	0	0
SRR17497123	0	0	0	0	0	0	0	0	0	0	0	0	0	0	0	0	0	0	0	0	0	0	0	0	0
SRR17497124	0	0	0	0	0	0	0	0	0	0	0	0	0	0	0	0	0	0	0	0	0	0	0	0	0
SRR17497125	0	0	0	0	0	0	0	0	0	0	0	0	0	0	0	0	0	0	0	0	0	0	0	0	0
SRR17497126	0	0	0	0	0	0	0	0	0	0	0	0	0	0	0	0	0	0	0	0	0	0	0	0	0
SRR17497127	0	0	0	0	0	0	0	0	0	0	0	0	0	0	0	0	0	0	0	0	0	0	0	0	0
SRR17509909	0	0	0	0	0	0	0	0	0	0	0	0	0	0	0	0	0	0	0	0	0	0	0	0	0
SRR17509910	0	0	0	0	0	0	0	0	0	0	0	0	0	0	0	0	0	0	0	0	0	0	0	0	0
SRR17509911	0	0	0	0	0	0	0	0	0	0	0	0	0	0	0	0	0	0	0	5.67132e-05	0	0	0	0	0
[truncated: 937 more rows]
